# Supplementary material for: Michelson Interferometer for Passive Atmospheric Sounding Institute of Meteorology and Climate Research/Instituto de Astrofísica de Andalucía version 8 retrieval of nitric oxide and lower-thermospheric temperature
Source: Copernicus journal article supplement (doi:10.5194/amt-16-2167-2023), 2023-04-25
Supplement: Supplementary file 1 [file amt-16-2167-2023-supplement.pdf]

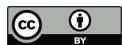

*Supplement of*

**Michelson Interferometer for Passive Atmospheric Sounding Institute of Meteorology and Climate Research/Instituto de Astrofísica de Andalucía version 8 retrieval of nitric oxide and lower-thermospheric temperature**

**Bernd Funke et al.**

*Correspondence to:* Bernd Funke (bernd@iaa.es)

The copyright of individual parts of the supplement might differ from the article licence.

## Contents

|           |                                                                                                                                             |            |
|-----------|---------------------------------------------------------------------------------------------------------------------------------------------|------------|
|           | <b>S1 NO error contribution profile plots and tabulated values for FR NOM data (V8H_NO_61)</b>                                              | <b>4</b>   |
|           | <b>S2 NO error contribution profile plots and tabulated values for RR NOM data (V8R_NO_261)</b>                                             | <b>38</b>  |
|           | <b>S3 NO error contribution profile plots and tabulated values for RR MA data (V8R_NO_561)</b>                                              | <b>72</b>  |
| <b>5</b>  | <b>S4 NO error contribution profile plots and tabulated values for RR UA data (V8R_NOwT_662) at low solar activity conditions</b>           | <b>106</b> |
|           | <b>S5 NO error contribution profile plots and tabulated values for RR UA data (V8R_NOwT_662) at high solar activity conditions</b>          | <b>141</b> |
| <b>10</b> | <b>S6 Temperature error contribution profile plots and tabulated values for RR UA data (V8R_TwNO_662) at low solar activity conditions</b>  | <b>175</b> |
|           | <b>S7 Temperature error contribution profile plots and tabulated values for RR UA data (V8R_TwNO_662) at high solar activity conditions</b> | <b>209</b> |

This document serves as reference for the definition of the representative atmospheres used for the calculation of nitric oxide error budgets, as listed in Tab. S1, and as collection of the respective error budgets for NO and NO+T retrievals for different measurement modes and periods:

- Nominal measurement mode (NOM) NO errors for the FR period (V8H\_NO\_61, 2002-2004), which are listed in tables S2–S35 and depicted in figures S1–S34,
- Nominal measurement mode (NOM) NO errors for the RR period (V8R\_NO\_261, 2005-2012), which are listed in tables S36–S69 and depicted in figures S35–S68.
- 20 – Middle Atmosphere measurement mode (MA) NO errors for the RR period (V8R\_NO\_561, 2005-2012), which are listed in tables S70–S103 and depicted in figures S69–S102.
- Upper Atmosphere measurement mode (UA) NO errors at low solar activity for the RR period (V8R\_NOwT\_662, 2005-2012), which are listed in tables S104–S137 and depicted in figures S103–S136.
- 25 – Upper Atmosphere measurement mode (UA) NO errors at high solar activity for the RR period (V8R\_NOwT\_662, 2005-2012), which are listed in tables S138–S171 and depicted in figures S137–S170.
- Upper Atmosphere measurement mode (UA) temperature errors at low solar activity for the RR period (V8R\_TwNO\_662, 2005-2012), which are listed in tables S172–S205 and depicted in figures S171–S204.
- 30 – Upper Atmosphere measurement mode (UA) temperature errors at high solar activity for the RR period (V8R\_TwNO\_662, 2005-2012), which are listed in tables S206–S239 and depicted in figures S205–S238.

The errors are presented as relative errors in percent for NO, regardless of whether they are additive or multiplicative errors. They were calculated with the average NO profile that was calculated from the single geolocations which contribute to the respective representative atmospheres.

**Table S1.** Labels and definitions of the representative atmospheric conditions which were used to calculate the error budget. Daytime atmospheres are defined by solar zenith angles  $< 90^\circ$ . Nighttime atmospheres are defined by solar zenith angles  $> 95^\circ$  for NOM observations,  $> 98^\circ$  for MA observations, and  $> 100^\circ$  for UA observations.

| representative atmosphere label   | month(s) used | latitude range                        |
|-----------------------------------|---------------|---------------------------------------|
| Northern polar winter day         | Jan, Feb      | $65^\circ\text{N} - 90^\circ\text{N}$ |
| Northern polar winter night       | Jan, Feb      | $65^\circ\text{N} - 90^\circ\text{N}$ |
| Northern polar spring day         | Apr           | $65^\circ\text{N} - 90^\circ\text{N}$ |
| Northern polar spring night       | Apr           | $65^\circ\text{N} - 90^\circ\text{N}$ |
| Northern polar summer day         | Jul, Aug      | $65^\circ\text{N} - 90^\circ\text{N}$ |
| Northern polar summer night       | Jul, Aug      | $65^\circ\text{N} - 90^\circ\text{N}$ |
| Northern polar autumn day         | Oct           | $65^\circ\text{N} - 90^\circ\text{N}$ |
| Northern polar autumn night       | Oct           | $65^\circ\text{N} - 90^\circ\text{N}$ |
| Northern midlatitude winter day   | Jan, Feb      | $40^\circ\text{N} - 60^\circ\text{N}$ |
| Northern midlatitude winter night | Jan, Feb      | $40^\circ\text{N} - 60^\circ\text{N}$ |
| Northern midlatitude spring day   | Apr           | $40^\circ\text{N} - 60^\circ\text{N}$ |
| Northern midlatitude spring night | Apr           | $40^\circ\text{N} - 60^\circ\text{N}$ |
| Northern midlatitude summer day   | Jul, Aug      | $40^\circ\text{N} - 60^\circ\text{N}$ |
| Northern midlatitude summer night | Jul, Aug      | $40^\circ\text{N} - 60^\circ\text{N}$ |
| Northern midlatitude autumn day   | Oct           | $40^\circ\text{N} - 60^\circ\text{N}$ |
| Northern midlatitude autumn night | Oct           | $40^\circ\text{N} - 60^\circ\text{N}$ |
| Tropics day                       | Apr           | $20^\circ\text{S} - 20^\circ\text{N}$ |
| Tropics night                     | Apr           | $20^\circ\text{S} - 20^\circ\text{N}$ |
| Southern midlatitude winter day   | Jul, Aug      | $40^\circ\text{S} - 60^\circ\text{S}$ |
| Southern midlatitude winter night | Jul, Aug      | $40^\circ\text{S} - 60^\circ\text{S}$ |
| Southern midlatitude spring day   | Oct           | $40^\circ\text{S} - 60^\circ\text{S}$ |
| Southern midlatitude spring night | Oct           | $40^\circ\text{S} - 60^\circ\text{S}$ |
| Southern midlatitude summer day   | Jan, Feb      | $40^\circ\text{S} - 60^\circ\text{S}$ |
| Southern midlatitude summer night | Jan, Feb      | $40^\circ\text{S} - 60^\circ\text{S}$ |
| Southern midlatitude autumn day   | Apr           | $40^\circ\text{S} - 60^\circ\text{S}$ |
| Southern midlatitude autumn night | Apr           | $40^\circ\text{S} - 60^\circ\text{S}$ |
| Southern polar winter day         | Jul, Aug      | $65^\circ\text{S} - 90^\circ\text{S}$ |
| Southern polar winter night       | Jul, Aug      | $65^\circ\text{S} - 90^\circ\text{S}$ |
| Southern polar spring day         | Oct           | $65^\circ\text{S} - 90^\circ\text{S}$ |
| Southern polar spring night       | Oct           | $65^\circ\text{S} - 90^\circ\text{S}$ |
| Southern polar summer day         | Jan, Feb      | $65^\circ\text{S} - 90^\circ\text{S}$ |
| Southern polar summer night       | Jan, Feb      | $65^\circ\text{S} - 90^\circ\text{S}$ |
| Southern polar autumn day         | Apr           | $65^\circ\text{S} - 90^\circ\text{S}$ |
| Southern polar autumn night       | Apr           | $65^\circ\text{S} - 90^\circ\text{S}$ |

**Table S2.** Nitric oxide error budget for Northern polar winter day. All uncertainties are  $1\sigma$ .

| altitude (km) | mean target (ppmv) | NLTE (%) | interf (%) | ILS (%) | shift (%) | offset (%) | gain (%) | spectro (%) | T+LOS (%) | noise (%) | random (%) | syst (%) | total (%) |
|---------------|--------------------|----------|------------|---------|-----------|------------|----------|-------------|-----------|-----------|------------|----------|-----------|
| 30            | 0.00               | 17.91    | 0.19       | 7.26    | 1.11      | 7.45       | 2.35     | 11.26       | 1.83      | 39.64     | 44.26      | 13.36    | 46.23     |
| 40            | 0.01               | 11.65    | 0.08       | 2.02    | 0.74      | 5.76       | 3.76     | 10.68       | 2.08      | 33.07     | 35.83      | 10.77    | 37.41     |
| 50            | 0.01               | 25.81    | 0.08       | 1.23    | 0.99      | 5.12       | 2.65     | 10.90       | 2.96      | 40.44     | 47.12      | 15.63    | 49.65     |
| 60            | 0.04               | 58.32    | 0.09       | 1.61    | 0.68      | 9.86       | 2.51     | 9.62        | 2.72      | 51.15     | 65.61      | 43.80    | 78.89     |
| 70            | 0.25               | 61.87    | 0.13       | 2.11    | 0.69      | 9.42       | 2.72     | 8.17        | 0.20      | 33.44     | 52.64      | 48.40    | 71.51     |
| 80            | 1.09               | 46.03    | 0.11       | 1.55    | 0.60      | 7.83       | 1.52     | 9.30        | 0.43      | 27.85     | 39.05      | 39.02    | 55.20     |
| 90            | 10.34              | 39.11    | 0.11       | 2.77    | 0.84      | 7.42       | 2.73     | 12.18       | 0.16      | 25.84     | 46.93      | 14.65    | 49.16     |
| 100           | 49.51              | 28.75    | 0.08       | 3.08    | 0.45      | 5.91       | 1.99     | 10.96       | 0.08      | 21.50     | 34.47      | 16.40    | 38.18     |
| 110           | 190.23             | 34.53    | 0.10       | 3.41    | 0.53      | 3.94       | 1.63     | 10.60       | 6.70      | 15.71     | 32.78      | 23.49    | 40.33     |
| 120           | 415.64             | 35.66    | 0.05       | 2.63    | 0.33      | 3.53       | 1.07     | 7.67        | 10.48     | 10.72     | 27.66      | 28.47    | 39.69     |
| 130           | 505.60             | 55.57    | 0.03       | 2.71    | 0.12      | 2.84       | 0.91     | 9.06        | 4.38      | 6.44      | 40.95      | 39.62    | 56.98     |
| 140           | 505.93             | 52.01    | 0.03       | 2.45    | 0.22      | 1.96       | 0.94     | 10.65       | 2.13      | 5.34      | 44.57      | 29.59    | 53.50     |
| 150           | 511.74             | 56.33    | 0.03       | 2.31    | 0.28      | 2.31       | 1.15     | 12.57       | 1.42      | 6.25      | 51.53      | 26.99    | 58.17     |

**S1 NO error contribution profile plots and tabulated values for FR NOM data (V8H\_NO\_61)**

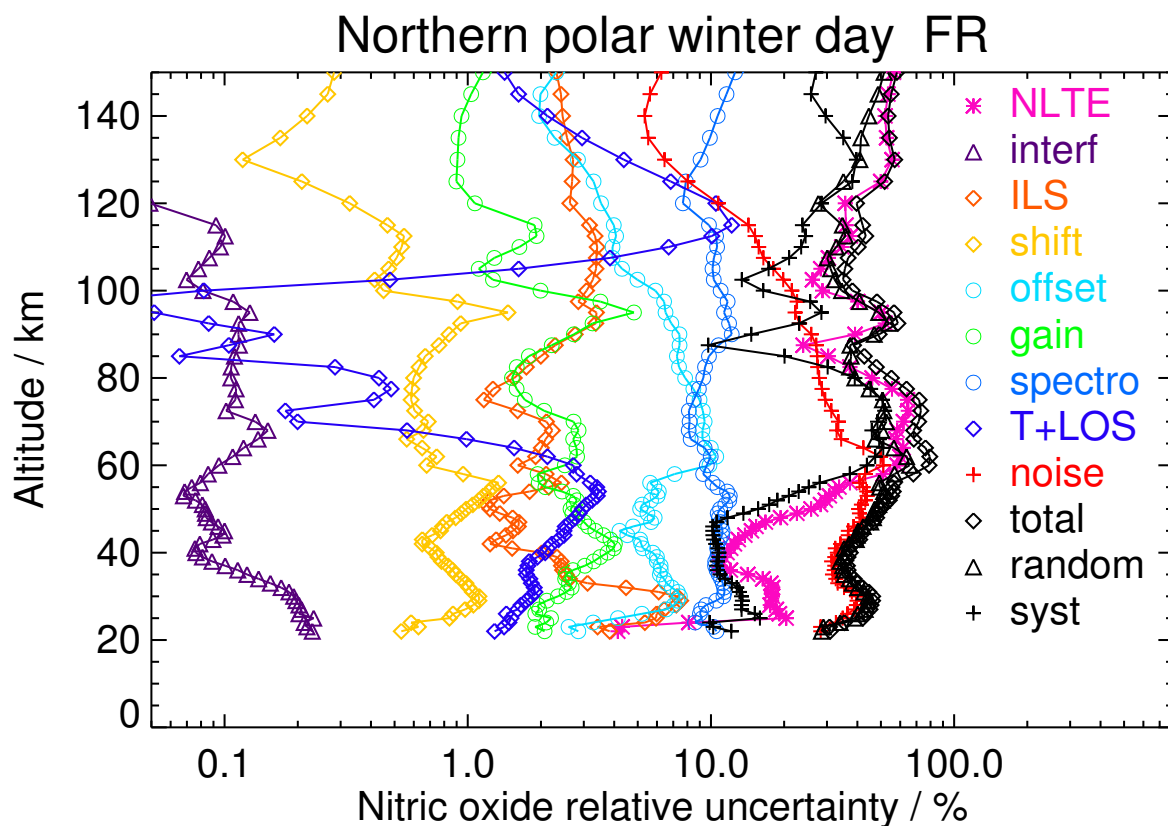

**Figure S1.** V8H\_NO\_61 Northern polar winter day

**Table S3.** Nitric oxide error budget for Northern polar winter night. All uncertainties are  $1\sigma$ .

| altitude (km) | mean target (ppmv) | NLTE (%) | interf (%) | ILS (%) | shift (%) | offset (%) | gain (%) | spectro (%) | T+LOS (%) | noise (%) | random (%) | syst (%) | total (%) |
|---------------|--------------------|----------|------------|---------|-----------|------------|----------|-------------|-----------|-----------|------------|----------|-----------|
| 30            | 0.00               | 3.01     | 0.23       | 0.35    | 1.13      | 4.39       | 0.47     | 1.36        | 0.80      | 42.77     | 43.01      | 3.35     | 43.14     |
| 40            | 0.00               | 35.56    | 0.77       | 0.87    | 0.79      | 10.14      | 15.31    | 7.88        | 3.56      | 64.88     | 75.20      | 15.26    | 76.73     |
| 50            | 0.00               | 8.33     | 0.09       | 3.04    | 1.32      | 2.05       | 2.77     | 15.49       | 1.06      | 14.70     | 21.97      | 8.15     | 23.43     |
| 60            | 0.06               | 15.99    | 0.09       | 0.66    | 0.45      | 10.57      | 4.58     | 13.54       | 4.59      | 51.39     | 54.86      | 15.00    | 56.88     |
| 70            | 0.19               | 31.63    | 0.12       | 1.30    | 0.65      | 11.53      | 4.62     | 12.51       | 1.89      | 42.64     | 49.83      | 25.54    | 56.00     |
| 80            | 1.10               | 29.36    | 0.14       | 1.36    | 0.87      | 10.76      | 1.95     | 10.26       | 0.11      | 35.80     | 43.30      | 22.29    | 48.70     |
| 90            | 6.50               | 25.82    | 0.14       | 1.78    | 0.92      | 9.97       | 2.19     | 12.37       | 0.53      | 33.22     | 43.79      | 10.69    | 45.07     |
| 100           | 45.04              | 25.29    | 0.14       | 1.81    | 0.87      | 8.41       | 2.04     | 13.44       | 0.96      | 26.86     | 36.01      | 18.03    | 40.27     |
| 110           | 190.91             | 37.07    | 0.09       | 1.94    | 0.39      | 4.96       | 1.67     | 11.03       | 6.41      | 15.86     | 32.47      | 27.67    | 42.66     |
| 120           | 301.29             | 30.36    | 0.05       | 2.25    | 0.22      | 3.34       | 1.10     | 9.29        | 7.58      | 9.87      | 24.14      | 24.45    | 34.36     |
| 130           | 251.51             | 42.91    | 0.05       | 2.41    | 0.11      | 3.04       | 1.08     | 9.92        | 4.15      | 7.38      | 34.18      | 29.32    | 45.03     |
| 140           | 232.59             | 32.51    | 0.04       | 1.93    | 0.10      | 2.03       | 0.92     | 11.01       | 2.52      | 6.18      | 26.07      | 23.48    | 35.09     |
| 150           | 213.59             | 37.38    | 0.04       | 1.06    | 0.14      | 2.63       | 0.85     | 10.88       | 1.46      | 7.66      | 29.39      | 26.86    | 39.82     |

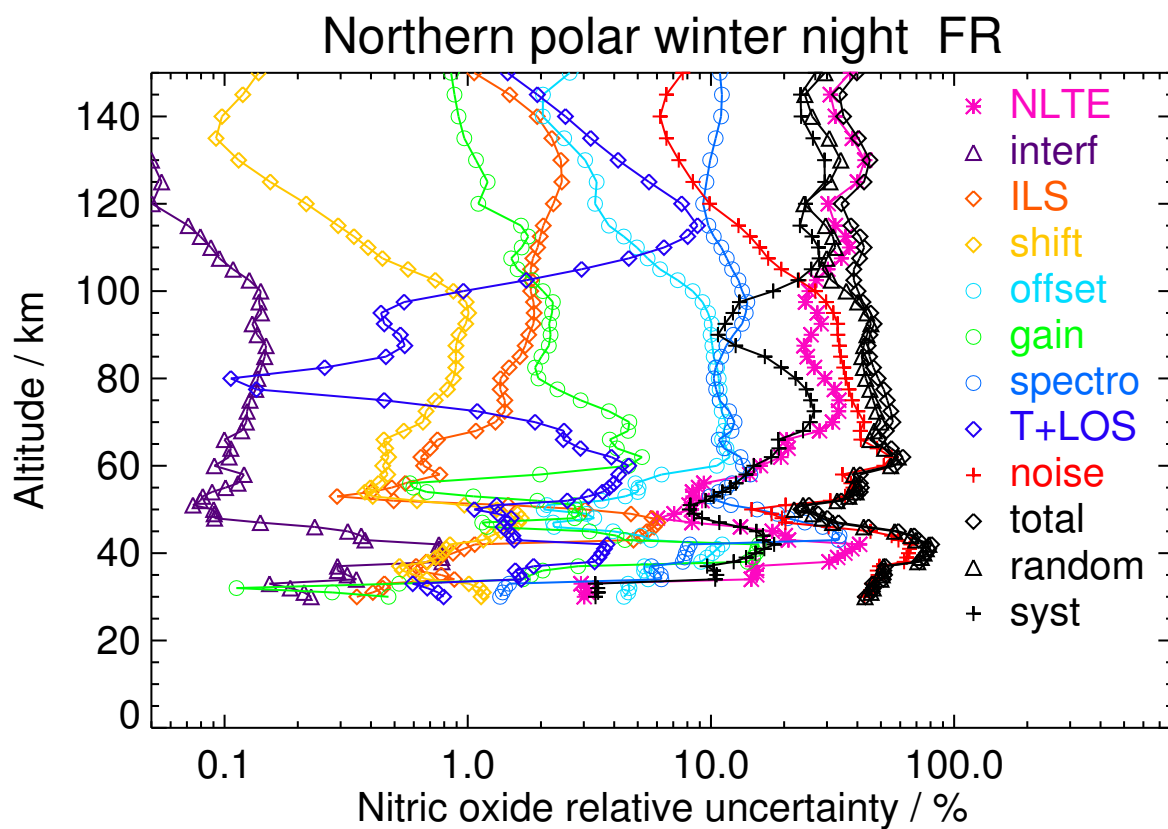

**Figure S2.** V8H\_NO\_61 Northern polar winter night

**Table S4.** Nitric oxide error budget for Northern polar spring day. All uncertainties are  $1\sigma$ .

| altitude (km) | mean target (ppmv) | NLTE (%) | interf (%) | ILS (%) | shift (%) | offset (%) | gain (%) | spectro (%) | T+LOS (%) | noise (%) | random (%) | syst (%) | total (%) |
|---------------|--------------------|----------|------------|---------|-----------|------------|----------|-------------|-----------|-----------|------------|----------|-----------|
| 20            | 0.00               | 7.53     | 0.12       | 7.99    | 0.64      | 2.85       | 1.45     | 9.94        | 1.44      | 20.97     | 23.15      | 11.66    | 25.92     |
| 30            | 0.00               | 8.96     | 0.09       | 2.45    | 0.65      | 3.61       | 1.71     | 10.72       | 2.11      | 23.15     | 24.51      | 12.54    | 27.53     |
| 40            | 0.01               | 4.61     | 0.03       | 2.06    | 0.38      | 2.04       | 2.31     | 9.16        | 1.20      | 12.93     | 13.64      | 10.09    | 16.96     |
| 50            | 0.01               | 9.43     | 0.05       | 0.48    | 0.71      | 1.95       | 1.92     | 9.22        | 0.82      | 22.06     | 23.35      | 11.15    | 25.88     |
| 60            | 0.00               | 76.47    | 0.10       | 0.96    | 0.72      | 9.08       | 1.45     | 10.97       | 1.99      | 58.61     | 80.06      | 55.53    | 97.43     |
| 90            | 0.53               | 71.99    | 0.11       | 0.70    | 0.09      | 12.69      | 1.33     | 8.09        | 0.87      | 42.49     | 49.22      | 69.25    | 84.96     |
| 100           | 11.49              | 71.14    | 0.11       | 2.06    | 0.70      | 10.08      | 1.71     | 10.36       | 0.21      | 35.76     | 47.63      | 65.48    | 80.97     |
| 110           | 85.22              | 69.98    | 0.07       | 2.06    | 0.34      | 6.55       | 1.68     | 9.95        | 8.79      | 22.88     | 42.01      | 62.31    | 75.15     |
| 120           | 222.86             | 36.93    | 0.03       | 2.63    | 0.34      | 2.97       | 1.12     | 9.22        | 7.97      | 10.74     | 27.36      | 29.94    | 40.56     |
| 130           | 392.02             | 48.17    | 0.03       | 2.54    | 0.16      | 3.06       | 0.70     | 8.85        | 4.45      | 7.57      | 27.30      | 41.79    | 49.92     |
| 140           | 570.72             | 34.01    | 0.02       | 1.89    | 0.12      | 1.86       | 0.72     | 9.41        | 2.77      | 5.33      | 22.17      | 28.24    | 35.90     |
| 150           | 652.69             | 40.40    | 0.02       | 1.03    | 0.15      | 1.91       | 0.83     | 10.04       | 1.55      | 5.99      | 31.92      | 27.53    | 42.15     |

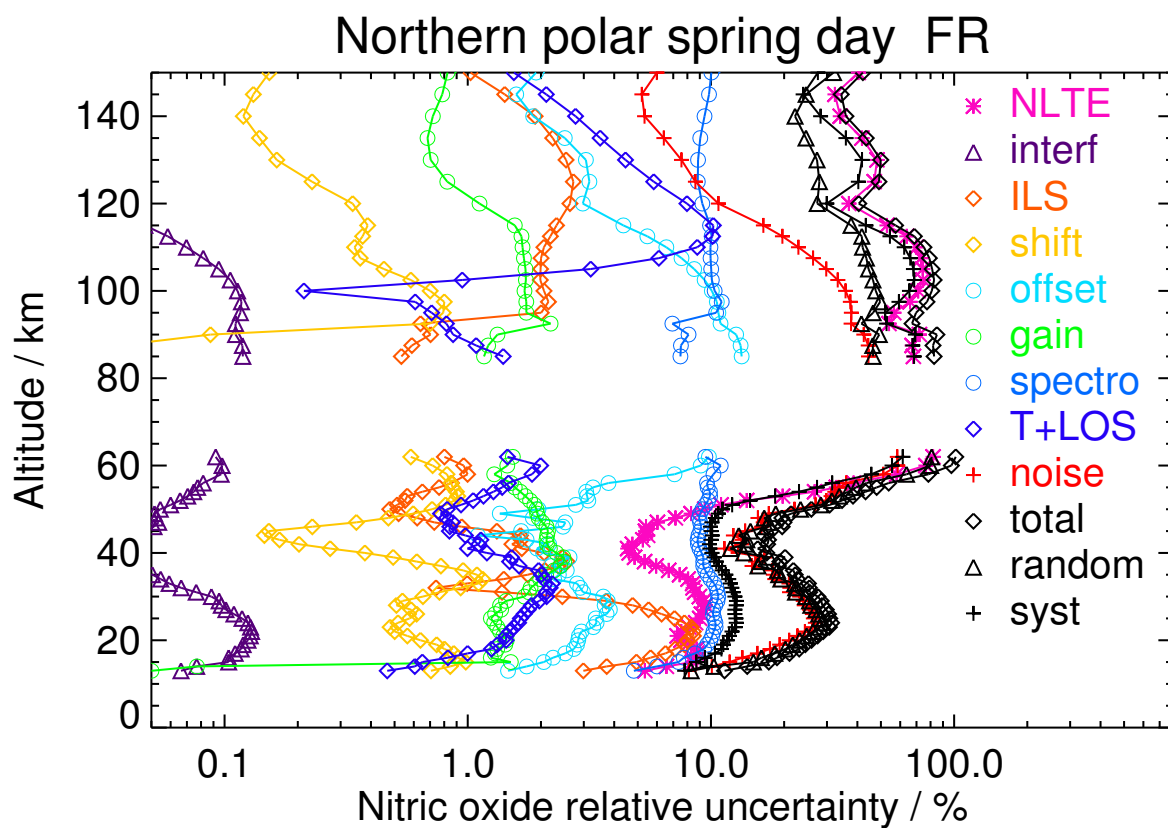

**Figure S3.** V8H\_NO\_61 Northern polar spring day

**Table S5.** Nitric oxide error budget for Northern polar spring night. All uncertainties are  $1\sigma$ .

| altitude (km) | mean target (ppmv) | NLTE (%) | interf (%) | ILS (%) | shift (%) | offset (%) | gain (%) | spectro (%) | T+LOS (%) | noise (%) | random (%) | syst (%) | total (%) |
|---------------|--------------------|----------|------------|---------|-----------|------------|----------|-------------|-----------|-----------|------------|----------|-----------|
| 30            | 0.00               | 17.67    | 0.28       | 9.84    | 2.97      | 3.77       | 6.88     | 6.27        | 1.17      | 28.84     | 35.83      | 8.26     | 36.77     |
| 40            | 0.00               | 48.49    | 0.15       | 5.50    | 2.97      | 4.31       | 12.30    | 17.45       | 0.98      | 25.79     | 58.15      | 12.21    | 59.42     |
| 50            | 0.00               | 29.33    | 0.14       | 0.85    | 0.84      | 3.02       | 3.61     | 13.64       | 1.25      | 29.09     | 38.48      | 20.89    | 43.79     |
| 60            | 0.02               | 29.67    | 0.07       | 3.35    | 1.06      | 5.35       | 2.69     | 12.54       | 1.74      | 29.69     | 39.72      | 19.81    | 44.39     |
| 100           | 14.24              | 79.05    | 0.15       | 1.48    | 1.36      | 10.67      | 2.10     | 12.52       | 0.98      | 36.67     | 54.72      | 69.85    | 88.73     |
| 110           | 151.84             | 80.12    | 0.10       | 1.26    | 0.81      | 6.67       | 1.78     | 12.36       | 9.84      | 21.22     | 49.62      | 68.61    | 84.67     |
| 120           | 512.69             | 44.10    | 0.04       | 2.36    | 0.28      | 2.63       | 1.12     | 9.02        | 8.96      | 9.10      | 31.56      | 34.74    | 46.94     |
| 130           | 673.94             | 49.80    | 0.04       | 2.63    | 0.24      | 2.48       | 1.08     | 11.58       | 4.56      | 6.25      | 28.83      | 43.10    | 51.85     |
| 140           | 703.12             | 43.25    | 0.04       | 1.81    | 0.18      | 1.64       | 1.16     | 12.27       | 2.48      | 5.44      | 32.43      | 31.82    | 45.43     |
| 150           | 654.39             | 64.68    | 0.04       | 0.94    | 0.25      | 2.54       | 1.24     | 12.54       | 1.12      | 7.40      | 44.46      | 49.28    | 66.37     |

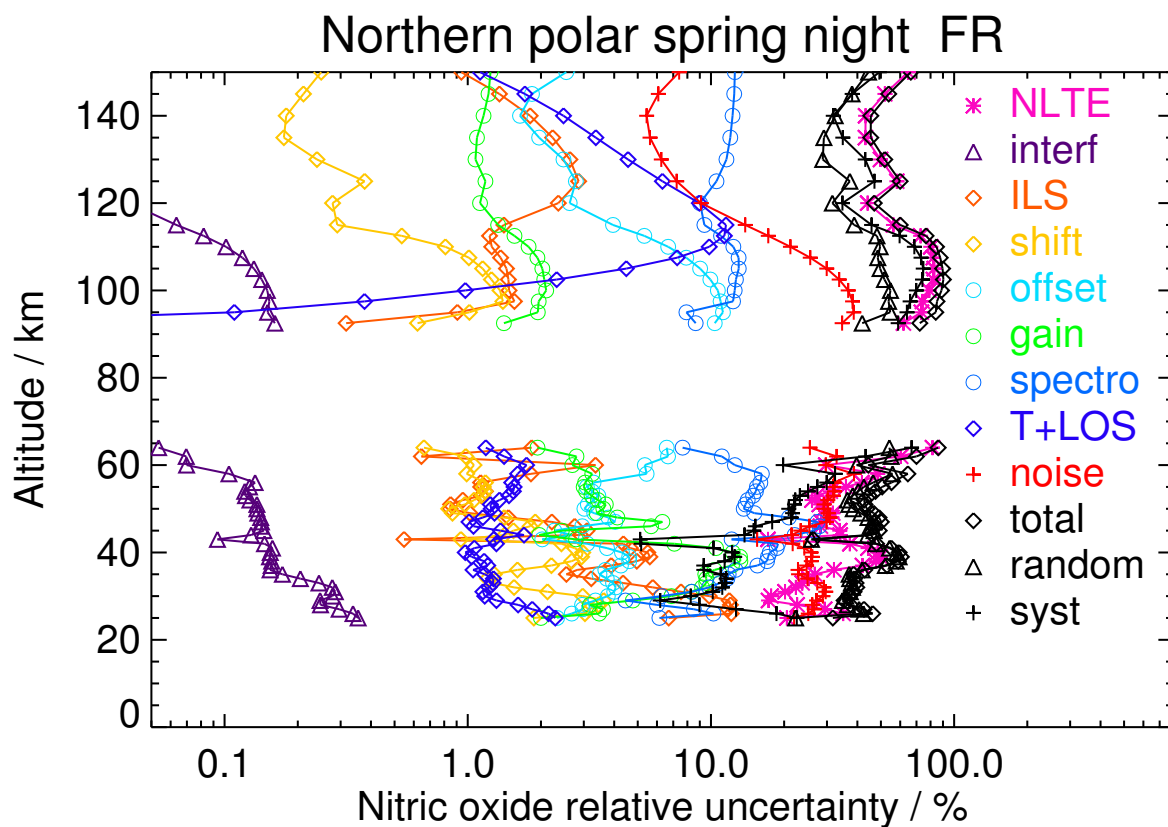

**Figure S4.** V8H\_NO\_61 Northern polar spring night



**Table S6.** Nitric oxide error budget for Northern polar summer day. All uncertainties are  $1\sigma$ .

| altitude (km) | mean target (ppmv) | NLTE (%) | interf (%) | ILS (%) | shift (%) | offset (%) | gain (%) | spectro (%) | T+LOS (%) | noise (%) | random (%) | syst (%) | total (%) |
|---------------|--------------------|----------|------------|---------|-----------|------------|----------|-------------|-----------|-----------|------------|----------|-----------|
| 20            | 0.00               | 6.00     | 0.14       | 11.40   | 1.26      | 2.85       | 1.53     | 9.26        | 1.62      | 21.23     | 22.79      | 14.06    | 26.78     |
| 30            | 0.01               | 9.39     | 0.06       | 3.57    | 0.60      | 2.86       | 1.63     | 9.13        | 2.52      | 21.51     | 22.66      | 12.27    | 25.78     |
| 40            | 0.01               | 5.04     | 0.03       | 2.61    | 0.84      | 2.17       | 2.65     | 8.76        | 1.70      | 14.39     | 15.22      | 10.00    | 18.21     |
| 50            | 0.01               | 6.89     | 0.03       | 0.49    | 0.51      | 0.89       | 2.09     | 8.56        | 0.69      | 9.49      | 11.24      | 9.52     | 14.73     |
| 60            | 0.01               | 45.63    | 0.08       | 2.52    | 0.90      | 6.84       | 1.74     | 11.64       | 1.42      | 43.31     | 54.52      | 34.34    | 64.43     |
| 90            | 0.73               | 76.25    | 0.12       | 0.91    | 1.47      | 10.41      | 0.83     | 8.03        | 0.78      | 39.80     | 55.88      | 66.73    | 87.04     |
| 100           | 17.67              | >100     | 0.10       | 1.62    | 1.13      | 8.56       | 1.00     | 9.51        | 1.81      | 31.52     | 67.81      | 83.31    | >100      |
| 110           | 72.43              | 99.06    | 0.04       | 2.03    | 0.44      | 4.71       | 1.21     | 8.75        | 8.17      | 16.90     | 77.33      | 65.50    | >100      |
| 120           | 226.11             | 41.44    | 0.03       | 2.40    | 0.38      | 2.53       | 0.89     | 7.95        | 7.08      | 9.19      | 30.68      | 31.41    | 43.91     |
| 130           | 632.40             | 73.94    | 0.03       | 3.48    | 0.38      | 2.78       | 1.24     | 10.80       | 5.63      | 7.56      | 53.07      | 53.65    | 75.46     |
| 140           | 1060.95            | 51.86    | 0.02       | 2.78    | 0.35      | 1.80       | 1.24     | 12.39       | 4.10      | 5.63      | 39.35      | 36.82    | 53.89     |
| 150           | 1289.58            | 50.69    | 0.02       | 2.12    | 0.39      | 1.67       | 1.38     | 13.93       | 2.63      | 5.56      | 41.36      | 33.16    | 53.01     |

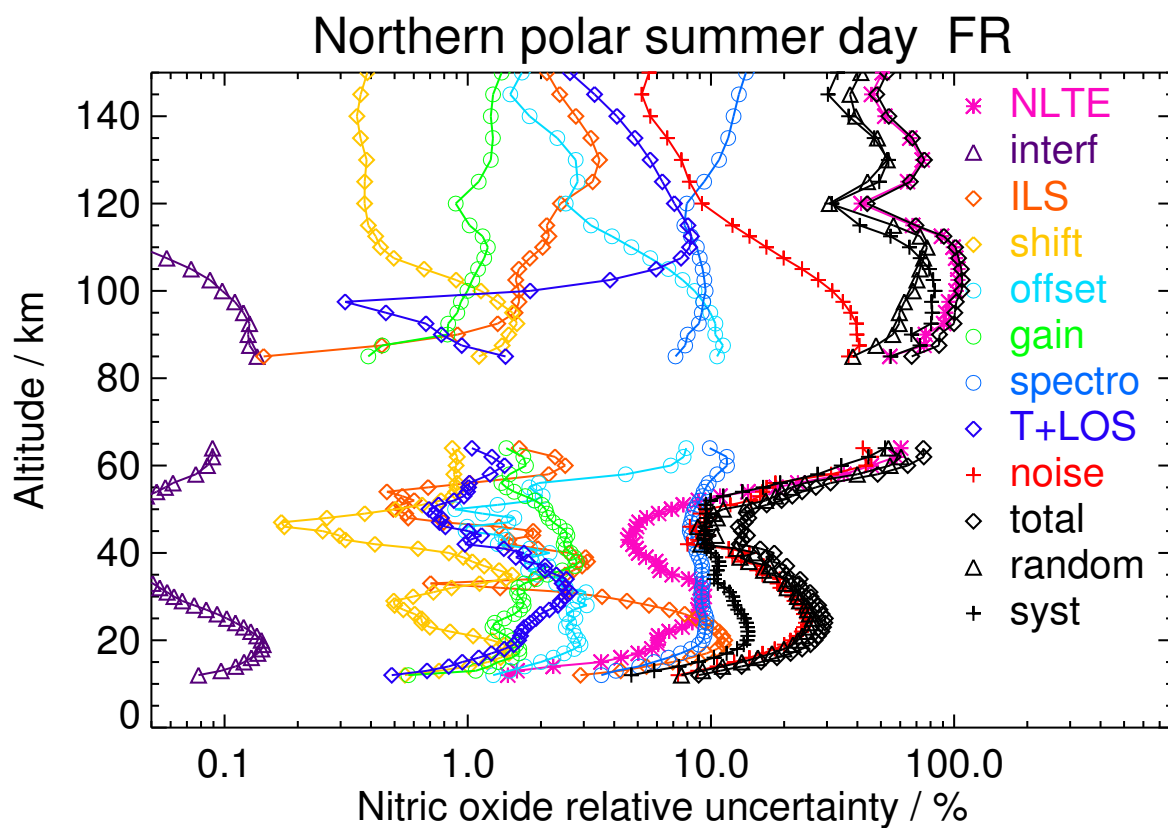

**Figure S5.** V8H\_NO\_61 Northern polar summer day

**Table S7.** Nitric oxide error budget for Northern polar summer night. All uncertainties are  $1\sigma$ .

| altitude (km) | mean target (ppmv) | NLTE (%) | interf (%) | ILS (%) | shift (%) | offset (%) | gain (%) | spectro (%) | T+LOS (%) | noise (%) | random (%) | syst (%) | total (%) |
|---------------|--------------------|----------|------------|---------|-----------|------------|----------|-------------|-----------|-----------|------------|----------|-----------|
| 30            | 0.00               | 19.75    | 0.31       | 6.82    | 0.71      | 4.20       | 4.89     | 9.58        | 1.98      | 33.77     | 40.05      | 10.54    | 41.41     |
| 40            | 0.00               | 19.54    | 0.10       | 1.93    | 0.95      | 3.10       | 3.65     | 6.53        | 1.49      | 22.35     | 29.99      | 7.38     | 30.88     |
| 50            | 0.00               | 11.97    | 0.10       | 2.44    | 1.59      | 2.75       | 5.26     | 18.36       | 1.42      | 19.69     | 27.87      | 11.69    | 30.22     |
| 60            | 0.01               | 26.82    | 0.13       | 2.02    | 0.81      | 7.73       | 2.78     | 12.67       | 1.63      | 49.07     | 54.45      | 19.95    | 57.99     |
| 90            | 1.48               | 41.75    | 0.13       | 1.08    | 0.71      | 9.07       | 1.12     | 10.24       | 0.79      | 30.85     | 43.12      | 32.03    | 53.72     |
| 100           | 32.26              | 59.59    | 0.11       | 0.79    | 0.69      | 7.79       | 1.64     | 10.66       | 2.92      | 26.09     | 41.20      | 52.16    | 66.46     |
| 110           | 151.11             | 78.41    | 0.07       | 1.02    | 0.24      | 4.49       | 1.72     | 9.57        | 12.99     | 14.77     | 63.83      | 50.75    | 81.55     |
| 120           | 392.23             | 49.59    | 0.05       | 3.15    | 0.26      | 2.92       | 0.83     | 11.10       | 9.20      | 8.74      | 37.09      | 37.24    | 52.56     |
| 130           | 501.06             | 58.71    | 0.06       | 3.05    | 0.16      | 2.76       | 0.98     | 11.06       | 4.99      | 7.37      | 42.29      | 43.33    | 60.55     |
| 140           | 568.00             | 32.97    | 0.05       | 1.91    | 0.29      | 1.77       | 0.94     | 10.82       | 3.11      | 6.04      | 23.94      | 26.18    | 35.47     |
| 150           | 578.11             | 46.88    | 0.05       | 0.87    | 0.35      | 2.45       | 0.81     | 10.28       | 1.75      | 7.36      | 31.51      | 37.08    | 48.66     |

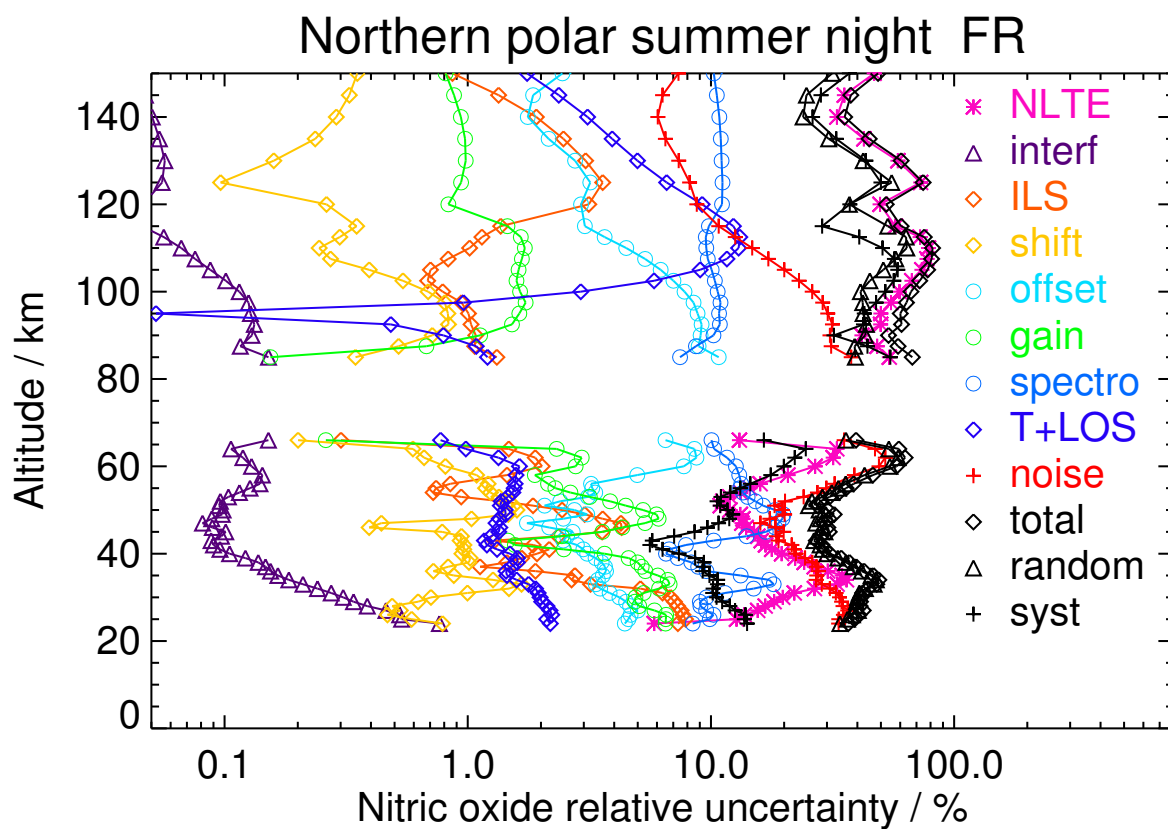

**Figure S6.** V8H\_NO\_61 Northern polar summer night

**Table S8.** Nitric oxide error budget for Northern polar autumn day. All uncertainties are  $1\sigma$ .

| altitude (km) | mean target (ppmv) | NLTE (%) | interf (%) | ILS (%) | shift (%) | offset (%) | gain (%) | spectro (%) | T+LOS (%) | noise (%) | random (%) | syst (%) | total (%) |
|---------------|--------------------|----------|------------|---------|-----------|------------|----------|-------------|-----------|-----------|------------|----------|-----------|
| 20            | 0.00               | 7.36     | 0.15       | 4.12    | 0.50      | 2.85       | 3.13     | 5.99        | 1.13      | 22.32     | 24.06      | 6.78     | 25.00     |
| 30            | 0.00               | 20.49    | 0.29       | 6.36    | 1.58      | 6.59       | 5.38     | 15.10       | 2.16      | 34.73     | 42.66      | 12.42    | 44.43     |
| 40            | 0.01               | 46.99    | 0.16       | 3.73    | 1.28      | 5.63       | 3.53     | 18.42       | 2.25      | 33.90     | 57.94      | 20.12    | 61.33     |
| 50            | 0.01               | >100     | 0.13       | 1.47    | 1.98      | 4.93       | 3.31     | 9.67        | 4.85      | 42.75     | >100       | 35.67    | >100      |
| 60            | 0.01               | 52.16    | 0.10       | 1.72    | 0.66      | 8.39       | 2.79     | 13.21       | 2.65      | 57.42     | 69.47      | 38.15    | 79.25     |
| 70            | 0.09               | 23.20    | 0.12       | 0.40    | 0.18      | 7.21       | 0.54     | 7.17        | 0.17      | 24.32     | 25.37      | 24.29    | 35.12     |
| 80            | 0.24               | 96.45    | 0.09       | 1.83    | 0.62      | 9.83       | 1.89     | 8.54        | 0.81      | 34.73     | 79.16      | 66.48    | >100      |
| 90            | 3.30               | 66.34    | 0.09       | 1.06    | 0.86      | 8.51       | 2.16     | 17.34       | 0.22      | 31.66     | 72.88      | 21.70    | 76.05     |
| 100           | 23.34              | 67.56    | 0.07       | 1.76    | 0.95      | 7.14       | 1.56     | 11.19       | 0.33      | 25.86     | 61.92      | 39.77    | 73.60     |
| 110           | 113.47             | 81.28    | 0.07       | 1.20    | 0.45      | 5.08       | 1.42     | 7.53        | 5.37      | 17.91     | 64.22      | 54.02    | 83.91     |
| 120           | 412.47             | 54.17    | 0.04       | 2.64    | 0.16      | 2.83       | 1.95     | 11.30       | 9.62      | 9.32      | 44.25      | 36.09    | 57.10     |
| 130           | 590.33             | >100     | 0.05       | 5.18    | 0.39      | 2.70       | 3.01     | 14.74       | 4.81      | 6.82      | >100       | 62.65    | >100      |
| 140           | 716.73             | >100     | 0.05       | 13.24   | 0.31      | 1.51       | 2.38     | 25.19       | 2.15      | 4.83      | >100       | 40.27    | >100      |
| 150           | 733.73             | 96.47    | 0.04       | 8.84    | 0.80      | 1.93       | 2.34     | 31.80       | 1.65      | 6.02      | 94.93      | 37.86    | >100      |

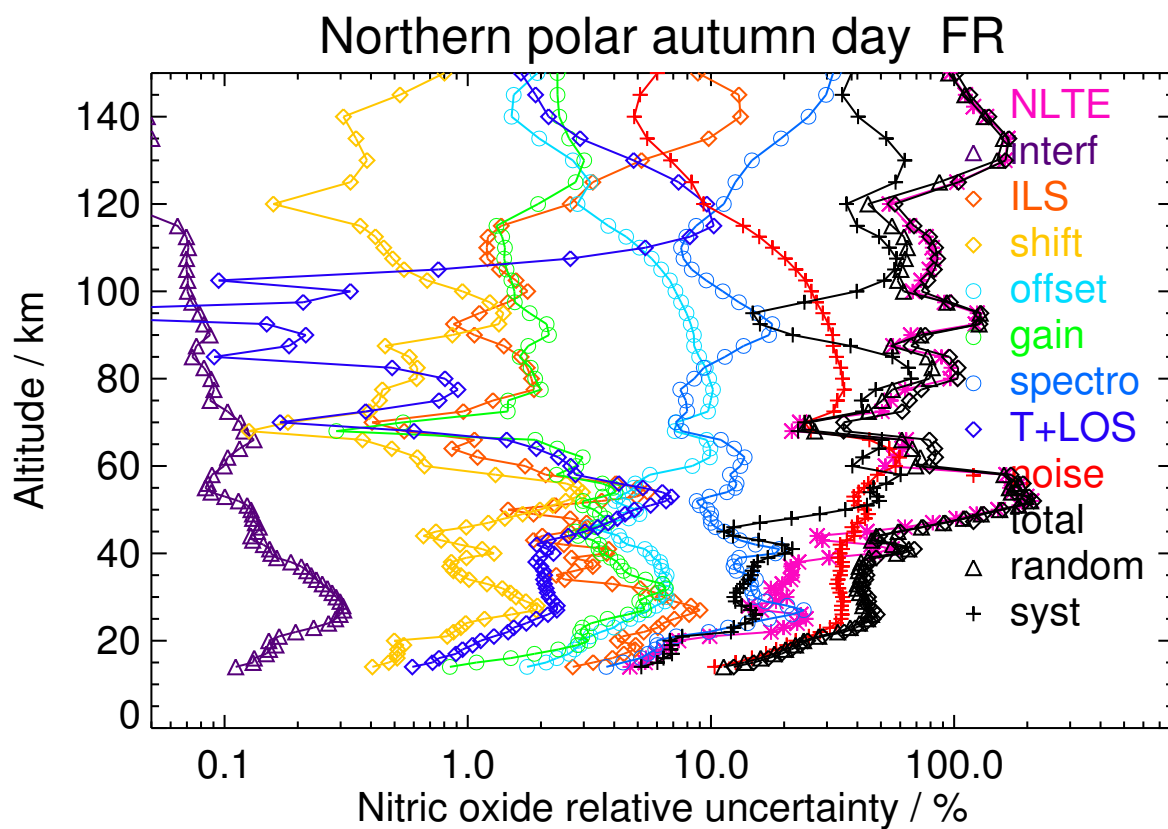

**Figure S7.** V8H\_NO\_61 Northern polar autumn day

**Table S9.** Nitric oxide error budget for Northern polar autumn night. All uncertainties are  $1\sigma$ .

| altitude (km) | mean target (ppmv) | NLTE (%) | interf (%) | ILS (%) | shift (%) | offset (%) | gain (%) | spectro (%) | T+LOS (%) | noise (%) | random (%) | syst (%) | total (%) |
|---------------|--------------------|----------|------------|---------|-----------|------------|----------|-------------|-----------|-----------|------------|----------|-----------|
| 30            | 0.00               | 43.90    | 0.22       | 3.45    | 1.84      | 9.57       | 4.01     | 5.63        | 2.22      | 49.56     | 53.85      | 40.54    | 67.40     |
| 40            | 0.00               | 19.63    | 0.17       | 2.81    | 0.69      | 7.11       | 3.29     | 10.53       | 2.02      | 44.86     | 49.95      | 9.31     | 50.81     |
| 50            | 0.01               | 29.94    | 0.08       | 7.62    | 2.42      | 5.40       | 3.23     | 28.15       | 3.46      | 33.96     | 49.36      | 22.84    | 54.38     |
| 60            | 0.06               | 79.96    | 0.10       | 3.63    | 1.09      | 5.35       | 3.51     | 10.07       | 3.80      | 29.74     | 74.64      | 43.33    | 86.30     |
| 70            | 0.29               | 76.74    | 0.10       | 3.21    | 0.52      | 7.20       | 2.66     | 9.12        | 1.93      | 27.61     | 66.94      | 48.24    | 82.51     |
| 80            | 0.69               | 92.75    | 0.19       | 2.16    | 0.86      | 8.77       | 3.75     | 14.00       | 0.18      | 30.85     | 98.19      | 14.33    | 99.23     |
| 90            | 9.15               | 98.55    | 0.17       | 1.52    | 0.72      | 8.11       | 4.42     | 12.47       | 0.98      | 24.05     | 74.99      | 70.08    | >100      |
| 100           | 49.74              | 68.08    | 0.10       | 1.84    | 0.80      | 6.58       | 3.29     | 16.65       | 0.43      | 20.66     | 72.49      | 11.91    | 73.47     |
| 110           | 199.76             | >100     | 0.10       | 1.65    | 0.72      | 5.48       | 1.88     | 12.00       | 9.40      | 16.81     | >100       | 85.70    | >100      |
| 120           | 699.24             | 99.74    | 0.07       | 4.99    | 0.58      | 2.57       | 2.00     | 15.90       | 10.11     | 8.28      | 94.32      | 38.87    | >100      |
| 130           | 872.89             | 95.85    | 0.05       | 4.80    | 0.61      | 2.46       | 1.64     | 15.32       | 3.62      | 6.18      | 76.74      | 60.14    | 97.50     |
| 140           | 728.35             | 47.90    | 0.05       | 2.64    | 0.40      | 1.67       | 1.40     | 14.22       | 2.00      | 5.63      | 39.17      | 31.79    | 50.44     |
| 150           | 667.41             | 66.02    | 0.05       | 1.35    | 0.28      | 2.15       | 1.41     | 14.41       | 1.20      | 6.68      | 51.45      | 44.43    | 67.98     |

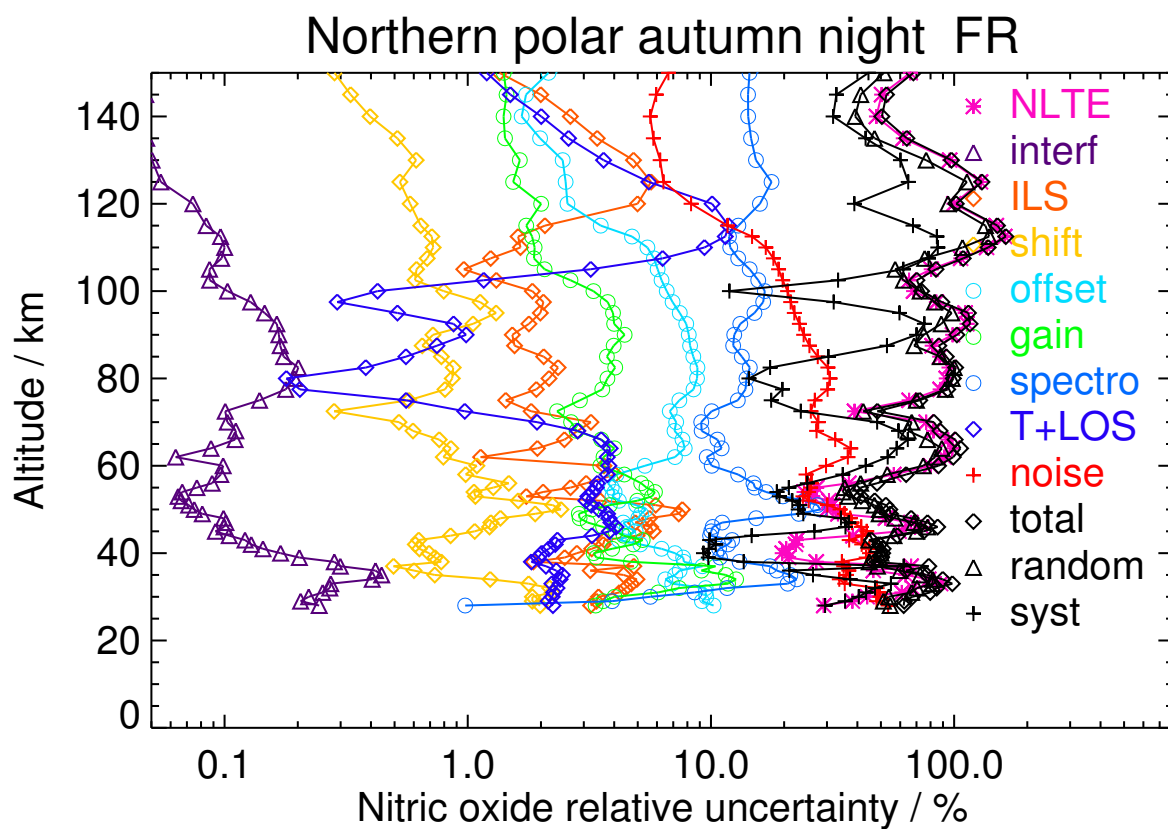

**Figure S8.** V8H\_NO\_61 Northern polar autumn night

**Table S10.** Nitric oxide error budget for Northern midlatitude winter day. All uncertainties are  $1\sigma$ .

| altitude (km) | mean target (ppmv) | NLTE (%) | interf (%) | ILS (%) | shift (%) | offset (%) | gain (%) | spectro (%) | T+LOS (%) | noise (%) | random (%) | syst (%) | total (%) |
|---------------|--------------------|----------|------------|---------|-----------|------------|----------|-------------|-----------|-----------|------------|----------|-----------|
| 20            | 0.00               | 5.94     | 0.19       | 5.02    | 0.47      | 4.07       | 1.91     | 7.04        | 0.95      | 24.78     | 25.73      | 9.13     | 27.30     |
| 30            | 0.00               | 10.75    | 0.19       | 3.27    | 0.71      | 5.61       | 2.12     | 12.10       | 1.82      | 30.52     | 32.48      | 13.76    | 35.27     |
| 40            | 0.01               | 8.13     | 0.05       | 2.19    | 0.58      | 3.60       | 2.91     | 10.11       | 1.45      | 22.01     | 23.58      | 11.19    | 26.10     |
| 50            | 0.01               | 10.47    | 0.06       | 0.68    | 0.70      | 2.48       | 2.44     | 10.85       | 1.75      | 26.27     | 27.77      | 12.75    | 30.56     |
| 60            | 0.02               | 28.33    | 0.10       | 1.70    | 0.84      | 9.33       | 4.07     | 15.86       | 2.21      | 50.27     | 55.97      | 23.68    | 60.77     |
| 70            | 0.09               | 56.05    | 0.16       | 1.35    | 0.46      | 10.06      | 6.35     | 12.32       | 0.24      | 31.75     | 52.53      | 41.05    | 66.67     |
| 80            | 0.52               | 48.79    | 0.12       | 1.93    | 0.36      | 8.30       | 2.72     | 9.83        | 0.56      | 27.77     | 45.06      | 36.03    | 57.70     |
| 90            | 3.78               | 24.03    | 0.12       | 2.07    | 0.47      | 7.84       | 3.58     | 8.90        | 0.21      | 27.35     | 36.15      | 13.29    | 38.52     |
| 100           | 15.24              | 30.79    | 0.10       | 1.97    | 0.42      | 7.30       | 3.03     | 8.49        | 0.18      | 26.37     | 35.75      | 22.45    | 42.22     |
| 110           | 89.96              | 39.71    | 0.05       | 2.65    | 0.22      | 4.22       | 1.01     | 8.38        | 6.37      | 16.00     | 33.59      | 29.00    | 44.38     |
| 120           | 170.09             | 42.36    | 0.05       | 2.97    | 0.38      | 4.77       | 1.48     | 10.46       | 9.61      | 14.77     | 37.26      | 29.32    | 47.41     |
| 130           | 236.67             | 40.70    | 0.04       | 2.75    | 0.42      | 3.29       | 2.05     | 12.07       | 6.05      | 8.75      | 32.41      | 29.79    | 44.02     |
| 140           | 273.14             | 38.50    | 0.05       | 2.16    | 0.33      | 1.83       | 2.28     | 12.36       | 3.52      | 5.35      | 32.66      | 24.96    | 41.10     |
| 150           | 293.54             | 33.84    | 0.06       | 1.18    | 0.26      | 2.14       | 2.25     | 11.84       | 1.78      | 6.35      | 25.22      | 26.53    | 36.60     |

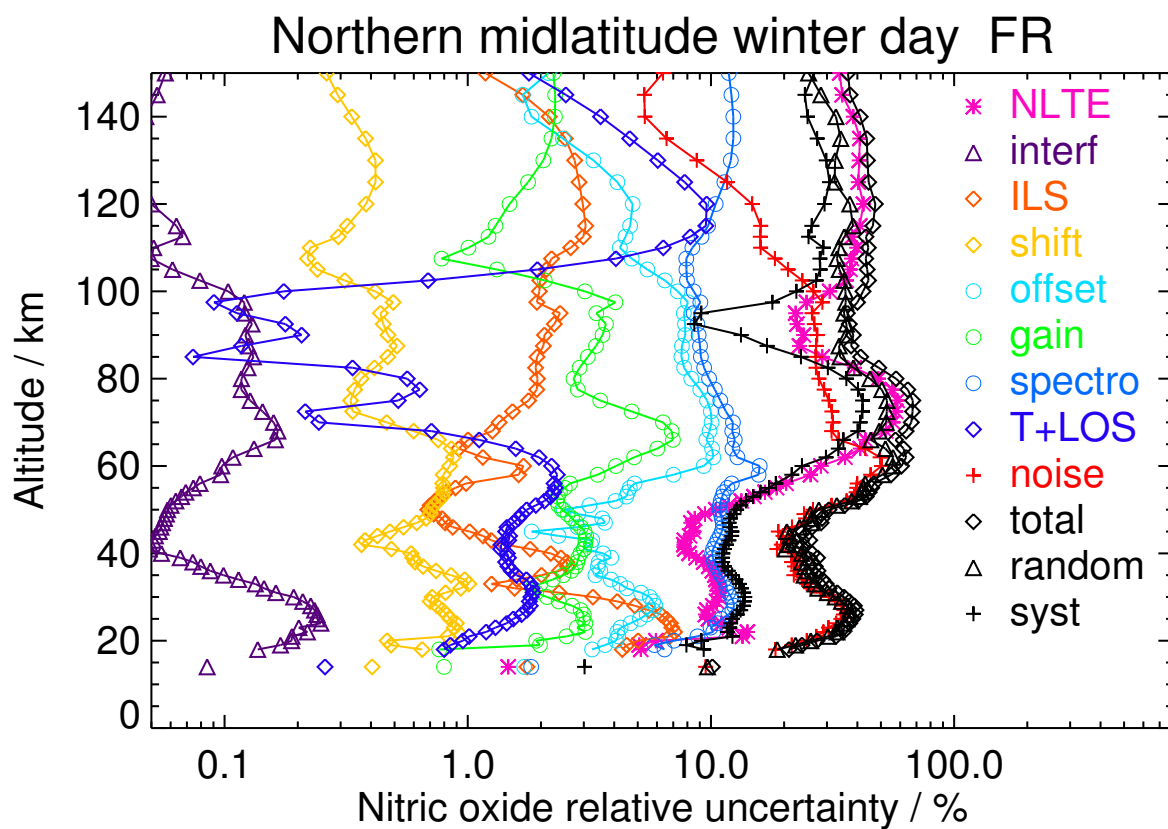

**Figure S9.** V8H\_NO\_61 Northern midlatitude winter day

**Table S11.** Nitric oxide error budget for Northern midlatitude winter night. All uncertainties are  $1\sigma$ .

| altitude (km) | mean target (ppmv) | NLTE (%) | interf (%) | ILS (%) | shift (%) | offset (%) | gain (%) | spectro (%) | T+LOS (%) | noise (%) | random (%) | syst (%) | total (%) |
|---------------|--------------------|----------|------------|---------|-----------|------------|----------|-------------|-----------|-----------|------------|----------|-----------|
| 60            | 0.01               | 21.39    | 0.14       | 0.55    | 0.97      | 13.29      | 3.27     | 14.72       | 2.21      | 73.92     | 78.04      | 15.52    | 79.57     |
| 70            | 0.05               | 23.53    | 0.15       | 1.23    | 0.99      | 13.53      | 9.28     | 22.11       | 0.79      | 54.10     | 63.00      | 16.50    | 65.13     |
| 80            | 0.40               | 19.35    | 0.25       | 2.44    | 0.73      | 10.23      | 4.05     | 25.19       | 0.30      | 36.28     | 46.71      | 16.45    | 49.52     |
| 90            | 3.31               | 13.49    | 0.32       | 2.76    | 0.64      | 8.54       | 6.88     | 16.17       | 0.61      | 32.40     | 36.93      | 16.07    | 40.28     |
| 100           | 9.72               | 15.85    | 0.17       | 1.92    | 0.27      | 8.44       | 2.91     | 11.09       | 2.08      | 28.75     | 32.35      | 15.55    | 35.90     |
| 110           | 38.74              | 17.85    | 0.11       | 1.91    | 0.27      | 5.75       | 1.95     | 10.14       | 7.50      | 20.09     | 26.42      | 14.96    | 30.36     |
| 120           | 66.23              | 21.29    | 0.05       | 1.80    | 0.14      | 3.80       | 1.16     | 9.51        | 6.56      | 11.45     | 21.02      | 17.18    | 27.15     |
| 130           | 63.00              | 22.92    | 0.04       | 1.64    | 0.16      | 3.26       | 1.15     | 9.83        | 4.73      | 9.66      | 19.87      | 18.90    | 27.43     |
| 140           | 63.33              | 22.72    | 0.04       | 1.46    | 0.20      | 3.13       | 0.94     | 9.81        | 3.68      | 10.33     | 19.30      | 19.32    | 27.31     |
| 150           | 66.15              | 22.97    | 0.05       | 1.25    | 0.22      | 3.61       | 0.86     | 9.49        | 2.83      | 11.82     | 20.16      | 19.35    | 27.94     |

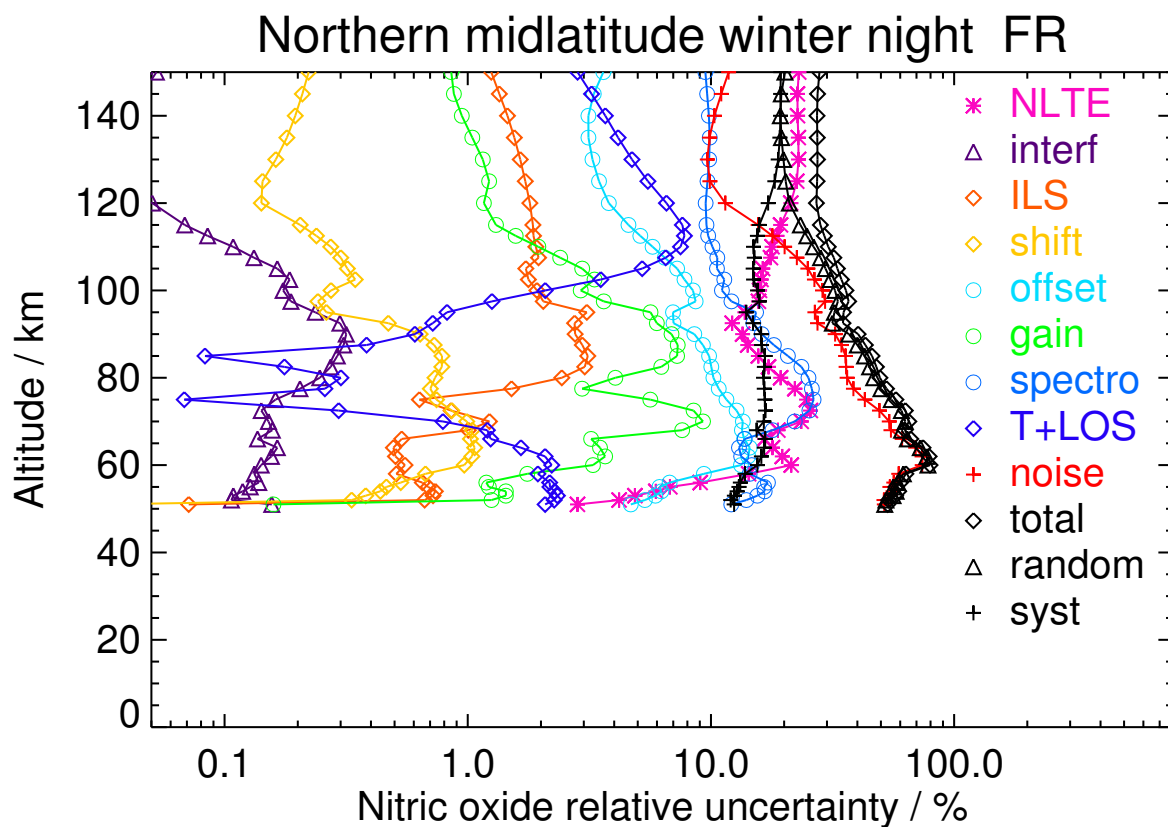

**Figure S10.** V8H\_NO\_61 Northern midlatitude winter night

**Table S12.** Nitric oxide error budget for Northern midlatitude spring day. All uncertainties are  $1\sigma$ .

| altitude (km) | mean target (ppmv) | NLTE (%) | interf (%) | ILS (%) | shift (%) | offset (%) | gain (%) | spectro (%) | T+LOS (%) | noise (%) | random (%) | syst (%) | total (%) |
|---------------|--------------------|----------|------------|---------|-----------|------------|----------|-------------|-----------|-----------|------------|----------|-----------|
| 20            | 0.00               | 10.02    | 0.17       | 8.25    | 1.35      | 3.57       | 2.47     | 7.26        | 1.30      | 24.64     | 27.45      | 9.87     | 29.16     |
| 30            | 0.00               | 19.57    | 0.20       | 4.13    | 1.21      | 4.81       | 4.17     | 10.44       | 1.98      | 27.36     | 34.68      | 10.04    | 36.11     |
| 40            | 0.01               | 10.97    | 0.05       | 3.21    | 0.85      | 2.31       | 3.01     | 12.21       | 1.39      | 14.19     | 16.61      | 14.91    | 22.32     |
| 50            | 0.01               | 26.66    | 0.06       | 0.37    | 0.79      | 2.24       | 3.38     | 12.22       | 0.83      | 21.11     | 31.67      | 17.92    | 36.38     |
| 60            | 0.01               | >100     | 0.09       | 5.56    | 1.74      | 9.90       | 3.17     | 34.75       | 2.12      | 58.02     | >100       | 99.43    | >100      |
| 90            | 0.68               | 76.38    | 0.12       | 1.95    | 1.05      | 13.01      | 1.38     | 6.99        | 0.37      | 46.84     | 59.05      | 69.05    | 90.85     |
| 100           | 7.99               | >100     | 0.10       | 1.40    | 0.88      | 11.13      | 1.05     | 7.14        | 0.29      | 38.97     | 74.43      | 81.47    | >100      |
| 110           | 53.38              | >100     | 0.06       | 1.32    | 0.63      | 7.25       | 1.11     | 7.75        | 8.54      | 25.32     | 81.53      | 69.90    | >100      |
| 120           | 179.82             | 94.58    | 0.04       | 2.37    | 0.65      | 3.15       | 2.18     | 11.00       | 9.79      | 11.81     | 85.98      | 43.94    | 96.56     |
| 130           | 389.62             | 69.33    | 0.05       | 2.74    | 0.90      | 2.42       | 3.46     | 16.23       | 5.90      | 7.92      | 61.46      | 37.63    | 72.06     |
| 140           | 615.66             | 97.83    | 0.06       | 3.02    | 1.63      | 1.81       | 5.29     | 28.03       | 3.73      | 5.99      | 93.41      | 41.51    | >100      |
| 150           | 863.10             | >100     | 0.08       | 6.13    | 3.10      | 2.36       | 9.20     | 50.95       | 2.21      | 6.09      | >100       | 50.68    | >100      |

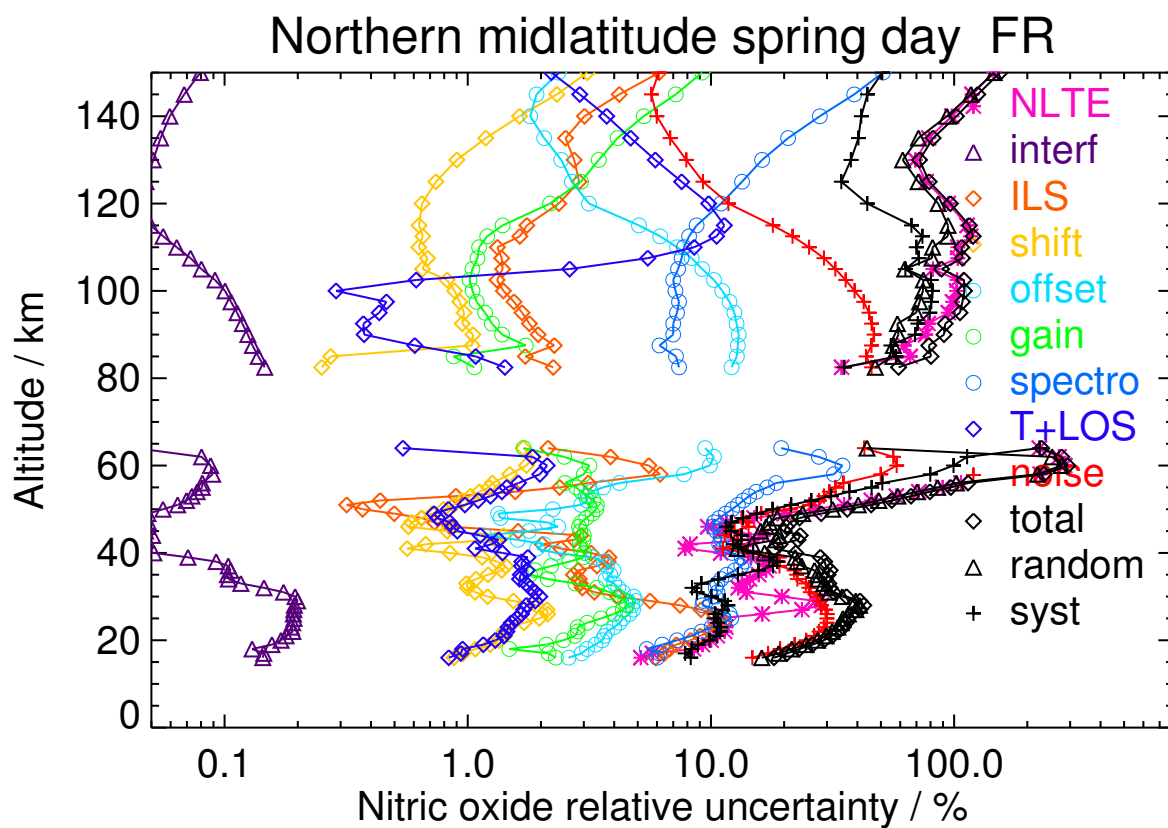

**Figure S11.** V8H\_NO\_61 Northern midlatitude spring day

**Table S13.** Nitric oxide error budget for Northern midlatitude spring night. All uncertainties are  $1\sigma$ .

| altitude (km) | mean target (ppmv) | NLTE (%) | interf (%) | ILS (%) | shift (%) | offset (%) | gain (%) | spectro (%) | T+LOS (%) | noise (%) | random (%) | syst (%) | total (%) |
|---------------|--------------------|----------|------------|---------|-----------|------------|----------|-------------|-----------|-----------|------------|----------|-----------|
| 60            | 0.00               | 65.11    | 0.18       | 1.05    | 0.93      | 14.17      | 1.79     | 11.45       | 4.63      | 94.98     | >100       | 40.08    | >100      |
| 90            | 0.71               | 46.89    | 0.17       | 1.14    | 0.52      | 12.23      | 1.46     | 11.40       | 0.13      | 40.83     | 51.54      | 38.62    | 64.41     |
| 100           | 5.70               | 78.83    | 0.17       | 0.96    | 0.52      | 11.13      | 2.08     | 11.13       | 1.02      | 35.73     | 72.11      | 50.46    | 88.01     |
| 110           | 47.30              | 67.80    | 0.11       | 1.27    | 0.37      | 6.96       | 1.47     | 10.25       | 7.88      | 23.57     | 58.91      | 43.60    | 73.29     |
| 120           | 174.94             | 35.54    | 0.04       | 2.28    | 0.23      | 3.01       | 0.85     | 10.53       | 8.44      | 10.52     | 30.99      | 24.71    | 39.63     |
| 130           | 227.14             | 46.51    | 0.04       | 2.76    | 0.10      | 2.85       | 0.80     | 11.68       | 5.91      | 7.75      | 39.69      | 28.90    | 49.10     |
| 140           | 268.32             | 33.75    | 0.04       | 2.24    | 0.11      | 1.84       | 0.82     | 11.65       | 4.10      | 6.18      | 28.89      | 22.45    | 36.59     |
| 150           | 266.97             | 36.83    | 0.04       | 1.52    | 0.18      | 2.12       | 0.85     | 11.74       | 2.69      | 7.39      | 31.94      | 23.32    | 39.55     |

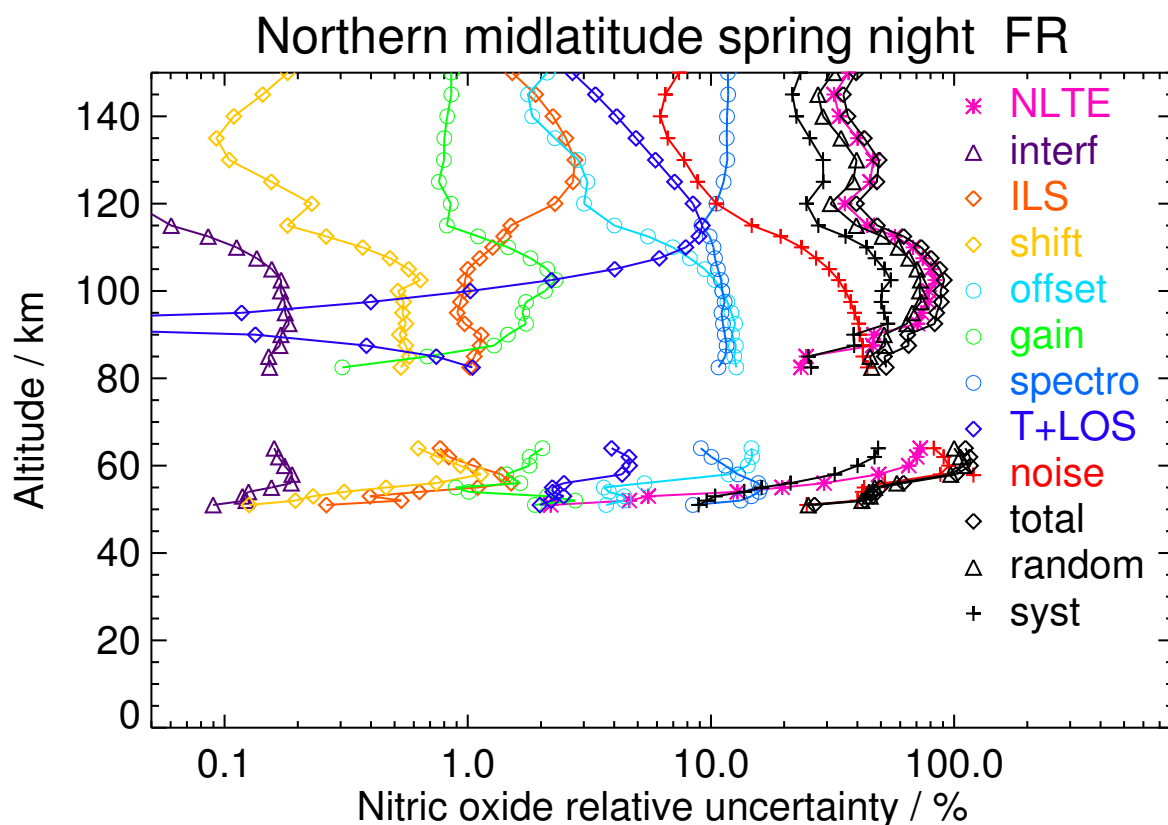

**Figure S12.** V8H\_NO\_61 Northern midlatitude spring night



**Table S14.** Nitric oxide error budget for Northern midlatitude summer day. All uncertainties are  $1\sigma$ .

| altitude (km) | mean target (ppmv) | NLTE (%) | interf (%) | ILS (%) | shift (%) | offset (%) | gain (%) | spectro (%) | T+LOS (%) | noise (%) | random (%) | syst (%) | total (%) |
|---------------|--------------------|----------|------------|---------|-----------|------------|----------|-------------|-----------|-----------|------------|----------|-----------|
| 20            | 0.00               | 6.02     | 0.26       | 7.43    | 1.24      | 3.57       | 3.19     | 6.68        | 1.54      | 24.63     | 25.97      | 9.75     | 27.74     |
| 30            | 0.00               | 10.02    | 0.12       | 4.21    | 0.81      | 4.15       | 2.68     | 10.66       | 1.99      | 26.24     | 28.62      | 11.43    | 30.82     |
| 40            | 0.01               | 5.88     | 0.03       | 2.66    | 0.56      | 2.27       | 2.93     | 10.34       | 1.69      | 15.18     | 15.98      | 11.87    | 19.90     |
| 50            | 0.01               | 4.20     | 0.04       | 0.32    | 0.46      | 1.22       | 3.03     | 9.33        | 0.71      | 13.33     | 14.10      | 9.75     | 17.14     |
| 60            | 0.01               | 29.96    | 0.11       | 0.95    | 0.79      | 9.81       | 1.91     | 9.18        | 1.15      | 58.67     | 62.54      | 24.82    | 67.28     |
| 80            | 0.03               | 54.78    | 0.11       | 1.43    | 0.79      | 11.69      | 0.38     | 7.82        | 0.85      | 38.81     | 40.55      | 55.35    | 68.61     |
| 90            | 1.04               | 60.19    | 0.13       | 0.96    | 0.89      | 11.24      | 1.63     | 7.03        | 0.78      | 39.39     | 51.25      | 52.24    | 73.18     |
| 100           | 15.59              | 48.88    | 0.10       | 0.76    | 0.54      | 8.98       | 1.18     | 6.26        | 0.81      | 30.64     | 38.15      | 44.67    | 58.74     |
| 110           | 65.65              | 54.99    | 0.05       | 1.02    | 0.35      | 5.30       | 1.52     | 7.98        | 10.72     | 18.03     | 43.28      | 41.06    | 59.66     |
| 120           | 136.48             | 34.85    | 0.04       | 1.89    | 0.51      | 3.21       | 2.63     | 11.65       | 9.67      | 10.58     | 27.94      | 28.22    | 39.71     |
| 130           | 260.79             | 51.68    | 0.04       | 2.49    | 0.61      | 3.63       | 3.42     | 12.06       | 6.77      | 9.52      | 36.96      | 40.22    | 54.63     |
| 140           | 416.97             | 43.35    | 0.04       | 1.92    | 0.52      | 2.60       | 3.18     | 11.59       | 4.93      | 6.99      | 31.01      | 33.85    | 45.91     |
| 150           | 514.60             | 31.90    | 0.04       | 0.83    | 0.42      | 1.53       | 2.60     | 10.55       | 3.12      | 5.03      | 20.76      | 27.25    | 34.26     |

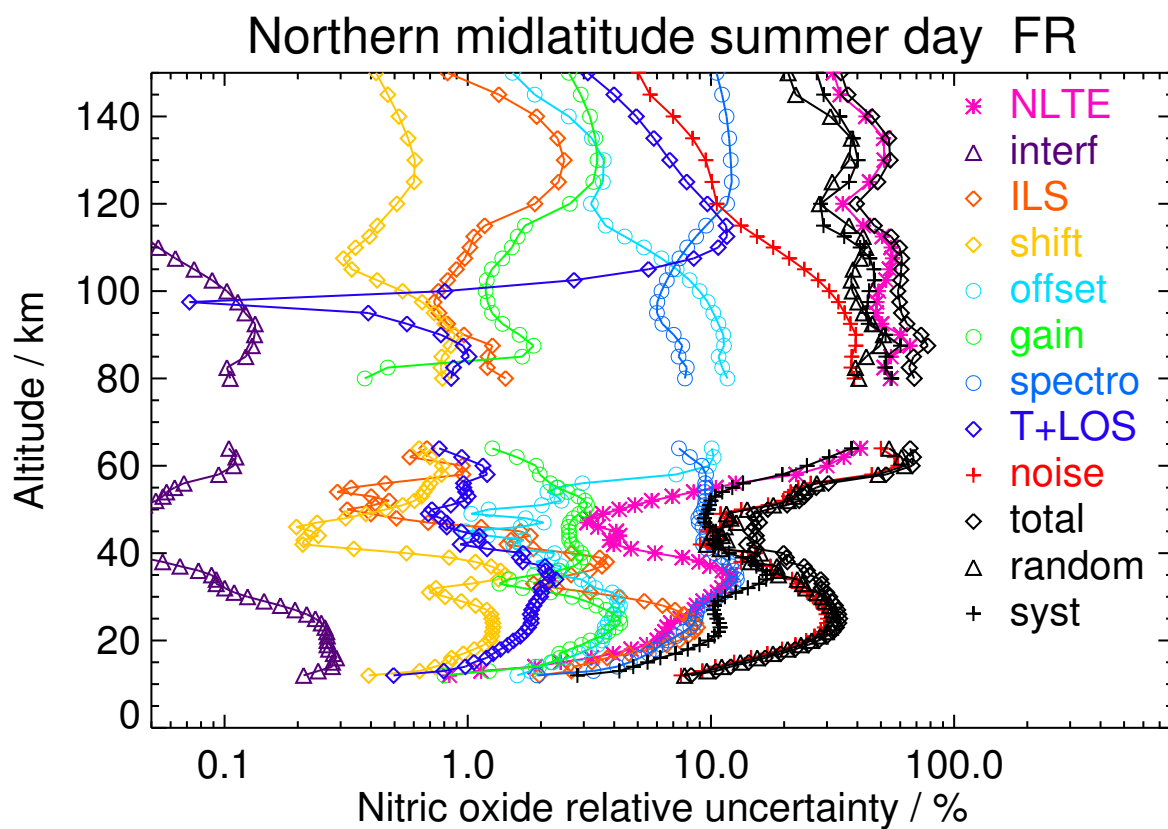

**Figure S13.** V8H\_NO\_61 Northern midlatitude summer day

**Table S15.** Nitric oxide error budget for Northern midlatitude summer night. All uncertainties are  $1\sigma$ .

| altitude (km) | mean target (ppmv) | NLTE (%) | interf (%) | ILS (%) | shift (%) | offset (%) | gain (%) | spectro (%) | T+LOS (%) | noise (%) | random (%) | syst (%) | total (%) |
|---------------|--------------------|----------|------------|---------|-----------|------------|----------|-------------|-----------|-----------|------------|----------|-----------|
| 60            | 0.01               | 65.72    | 0.13       | 2.13    | 0.97      | 11.34      | 2.93     | 12.98       | 2.90      | 75.39     | 98.78      | 23.77    | >100      |
| 90            | 0.36               | 14.82    | 0.12       | 1.10    | 0.64      | 11.00      | 0.52     | 12.69       | 1.05      | 43.74     | 45.12      | 19.54    | 49.17     |
| 100           | 11.09              | 71.80    | 0.15       | 0.67    | 0.74      | 9.56       | 2.31     | 11.93       | 3.05      | 31.65     | 65.59      | 45.87    | 80.04     |
| 110           | 65.91              | 85.87    | 0.09       | 1.16    | 0.52      | 5.34       | 1.75     | 9.25        | 12.91     | 18.34     | 77.17      | 45.17    | 89.42     |
| 120           | 215.64             | 51.65    | 0.05       | 1.60    | 0.45      | 2.68       | 1.63     | 11.71       | 9.40      | 8.85      | 47.98      | 26.12    | 54.63     |
| 130           | 355.76             | 88.66    | 0.06       | 4.02    | 0.46      | 2.63       | 3.11     | 15.10       | 6.13      | 6.94      | 78.99      | 44.35    | 90.59     |
| 140           | 413.61             | 69.16    | 0.05       | 3.42    | 0.42      | 1.77       | 1.91     | 16.52       | 4.05      | 5.89      | 64.11      | 31.88    | 71.60     |
| 150           | 413.05             | 83.36    | 0.05       | 2.76    | 0.59      | 2.34       | 2.09     | 16.80       | 2.41      | 7.40      | 77.01      | 37.13    | 85.49     |

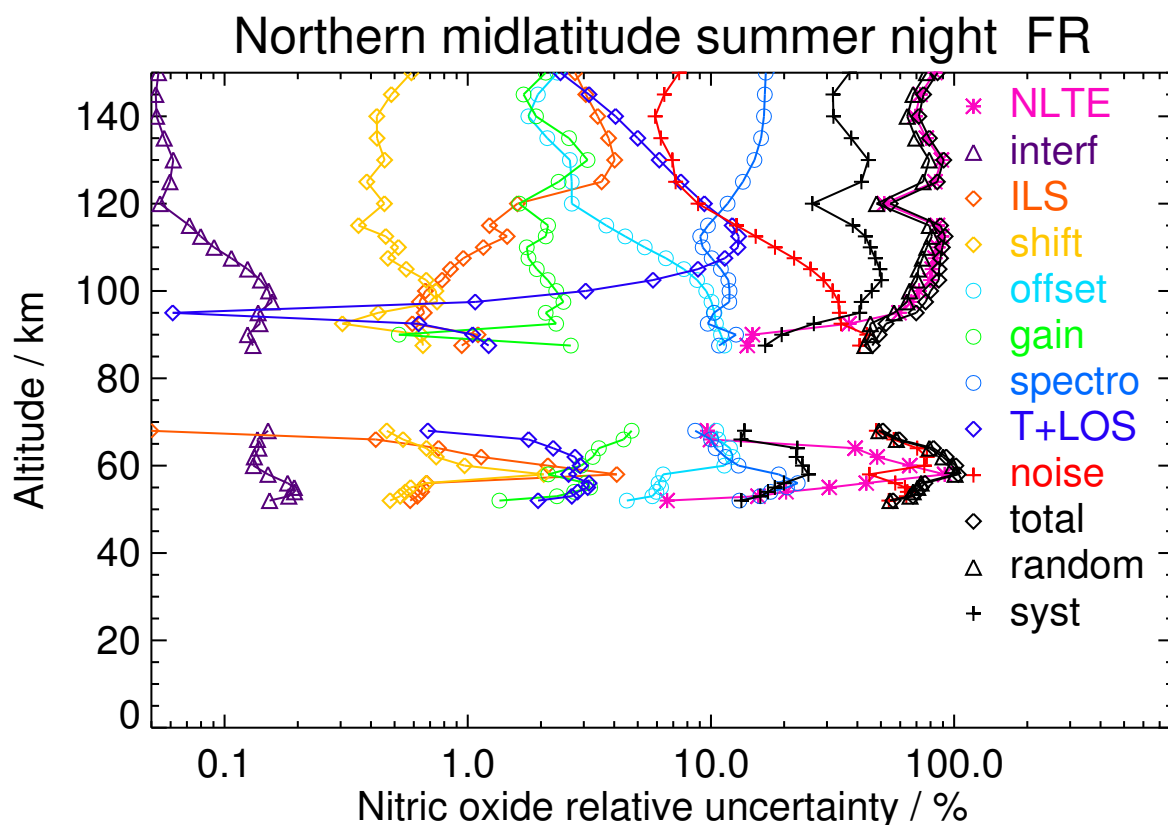

**Figure S14.** V8H\_NO\_61 Northern midlatitude summer night

**Table S16.** Nitric oxide error budget for Northern midlatitude autumn day. All uncertainties are  $1\sigma$ .

| altitude (km) | mean target (ppmv) | NLTE (%) | interf (%) | ILS (%) | shift (%) | offset (%) | gain (%) | spectro (%) | T+LOS (%) | noise (%) | random (%) | syst (%) | total (%) |
|---------------|--------------------|----------|------------|---------|-----------|------------|----------|-------------|-----------|-----------|------------|----------|-----------|
| 20            | 0.00               | 4.14     | 0.21       | 5.52    | 0.62      | 3.42       | 4.90     | 6.08        | 1.42      | 24.62     | 25.78      | 8.03     | 27.00     |
| 30            | 0.00               | 9.44     | 0.14       | 3.93    | 0.76      | 4.43       | 1.98     | 11.85       | 1.71      | 29.14     | 30.57      | 13.66    | 33.48     |
| 40            | 0.01               | 8.29     | 0.03       | 2.79    | 0.54      | 2.67       | 3.30     | 11.42       | 1.54      | 19.65     | 20.40      | 14.06    | 24.78     |
| 50            | 0.01               | 8.95     | 0.04       | 0.63    | 0.47      | 1.73       | 2.55     | 9.86        | 0.84      | 20.42     | 21.82      | 11.35    | 24.60     |
| 60            | 0.01               | 49.10    | 0.06       | 3.14    | 1.35      | 7.68       | 4.31     | 14.84       | 1.97      | 46.81     | 66.96      | 20.76    | 70.11     |
| 80            | 0.11               | 62.66    | 0.10       | 2.24    | 0.50      | 12.75      | 1.80     | 8.92        | 0.84      | 51.42     | 70.76      | 42.60    | 82.60     |
| 90            | 1.71               | 27.53    | 0.09       | 2.35    | 0.50      | 11.09      | 2.31     | 8.30        | 0.40      | 43.57     | 46.65      | 26.15    | 53.48     |
| 100           | 5.91               | 93.37    | 0.08       | 0.83    | 0.36      | 10.36      | 0.81     | 8.91        | 0.30      | 38.40     | 78.70      | 64.70    | >100      |
| 110           | 32.54              | 77.59    | 0.06       | 1.09    | 0.34      | 6.79       | 1.13     | 9.78        | 3.72      | 27.26     | 69.91      | 45.09    | 83.19     |
| 120           | 98.00              | 44.50    | 0.04       | 2.31    | 0.55      | 3.24       | 1.90     | 12.13       | 7.40      | 13.81     | 41.19      | 26.39    | 48.92     |
| 130           | 187.01             | 52.50    | 0.03       | 3.30    | 0.57      | 2.63       | 2.56     | 13.69       | 5.15      | 8.91      | 48.05      | 27.65    | 55.44     |
| 140           | 262.53             | 35.24    | 0.03       | 2.32    | 0.50      | 1.76       | 2.77     | 13.69       | 3.57      | 6.20      | 30.63      | 23.63    | 38.69     |
| 150           | 315.14             | 33.68    | 0.03       | 1.43    | 0.40      | 1.70       | 2.79     | 13.23       | 2.30      | 6.19      | 28.72      | 23.25    | 36.95     |

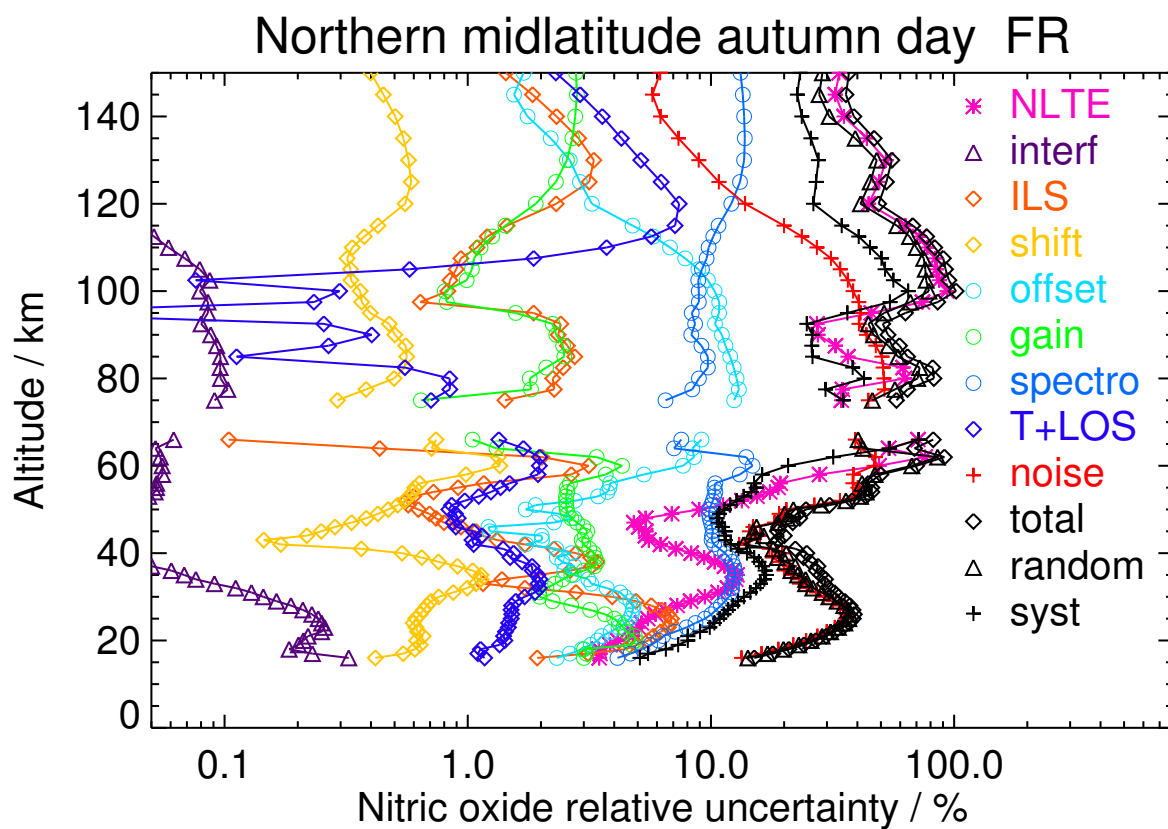

**Figure S15.** V8H\_NO\_61 Northern midlatitude autumn day

**Table S17.** Nitric oxide error budget for Northern midlatitude autumn night. All uncertainties are  $1\sigma$ .

| altitude (km) | mean target (ppmv) | NLTE (%) | interf (%) | ILS (%) | shift (%) | offset (%) | gain (%) | spectro (%) | T+LOS (%) | noise (%) | random (%) | syst (%) | total (%) |
|---------------|--------------------|----------|------------|---------|-----------|------------|----------|-------------|-----------|-----------|------------|----------|-----------|
| 50            | 0.01               | 10.73    | 0.14       | 1.59    | 1.17      | 3.47       | 6.05     | 15.55       | 2.37      | 38.83     | 41.68      | 13.61    | 43.85     |
| 60            | 0.01               | 22.29    | 0.10       | 1.35    | 0.65      | 8.95       | 1.62     | 9.45        | 3.02      | 66.52     | 69.63      | 16.02    | 71.45     |
| 70            | 0.01               | 15.79    | 0.14       | 1.05    | 0.54      | 12.47      | 3.17     | 9.77        | 0.95      | 64.61     | 66.86      | 14.70    | 68.46     |
| 80            | 0.05               | 14.47    | 0.12       | 1.28    | 0.52      | 11.71      | 2.72     | 10.35       | 0.34      | 52.21     | 54.73      | 13.89    | 56.47     |
| 90            | 3.71               | >100     | 0.18       | 2.85    | 0.69      | 7.82       | 2.52     | 32.14       | 0.97      | 27.54     | >100       | 37.89    | >100      |
| 100           | 23.54              | 60.26    | 0.17       | 2.07    | 1.04      | 7.57       | 3.35     | 33.45       | 0.58      | 25.98     | 72.20      | 16.90    | 74.15     |
| 110           | 107.46             | 64.24    | 0.08       | 1.46    | 0.37      | 5.37       | 2.35     | 15.11       | 6.27      | 19.19     | 57.49      | 38.66    | 69.28     |
| 120           | 602.95             | >100     | 0.07       | 7.08    | 1.91      | 2.01       | 2.41     | 27.07       | 8.03      | 8.12      | >100       | 25.36    | >100      |
| 130           | 353.84             | 78.89    | 0.04       | 4.74    | 0.36      | 2.07       | 2.57     | 16.08       | 5.02      | 6.43      | 73.16      | 35.07    | 81.13     |
| 140           | 314.90             | 50.15    | 0.05       | 2.67    | 0.20      | 1.62       | 1.32     | 16.22       | 2.60      | 6.39      | 47.20      | 24.68    | 53.27     |
| 150           | 256.13             | 72.53    | 0.06       | 1.59    | 0.20      | 2.55       | 1.23     | 15.78       | 1.57      | 9.10      | 66.20      | 34.97    | 74.87     |

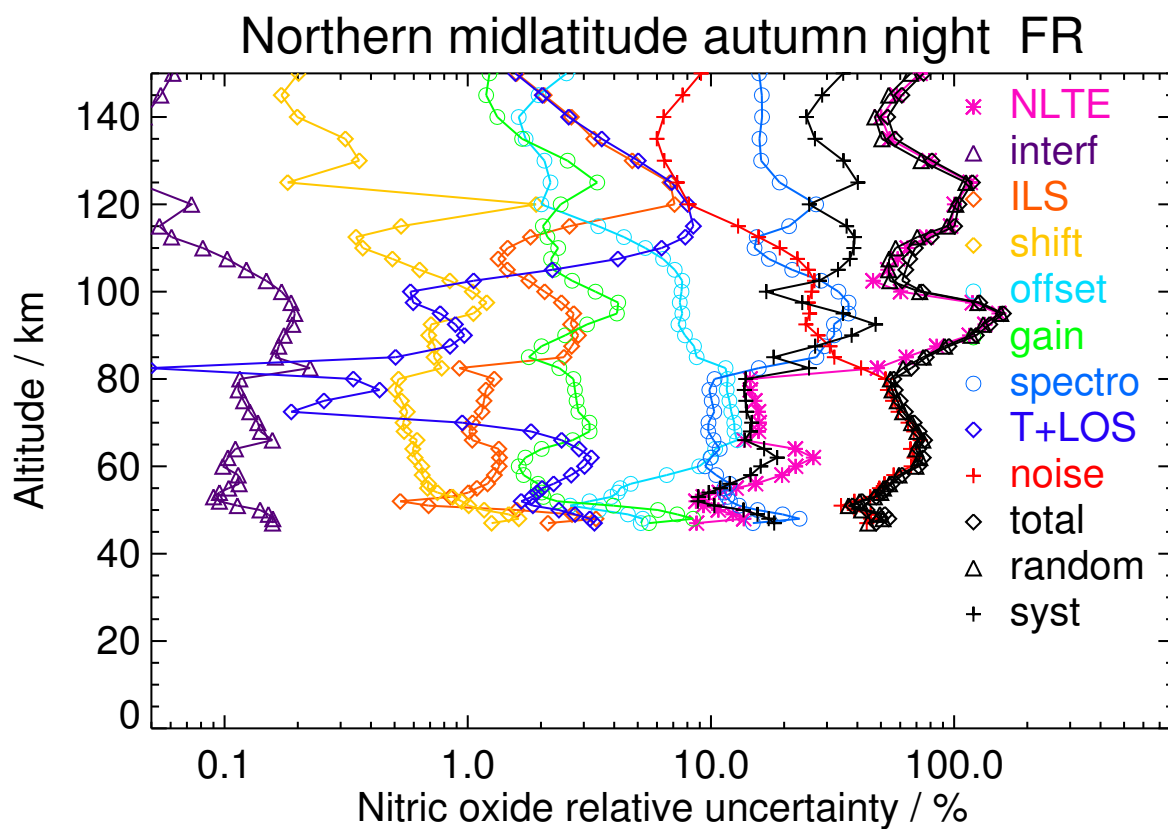

**Figure S16.** V8H\_NO\_61 Northern midlatitude autumn night

**Table S18.** Nitric oxide error budget for Tropics day. All uncertainties are  $1\sigma$ .

| altitude (km) | mean target (ppmv) | NLTE (%) | interf (%) | ILS (%) | shift (%) | offset (%) | gain (%) | spectro (%) | T+LOS (%) | noise (%) | random (%) | syst (%) | total (%) |
|---------------|--------------------|----------|------------|---------|-----------|------------|----------|-------------|-----------|-----------|------------|----------|-----------|
| 20            | 0.00               | 6.72     | 0.34       | 2.16    | 0.65      | 3.23       | 3.28     | 8.17        | 1.82      | 23.72     | 24.89      | 9.21     | 26.54     |
| 30            | 0.00               | 8.66     | 0.18       | 3.72    | 0.44      | 4.24       | 6.57     | 13.14       | 2.36      | 28.51     | 29.70      | 16.10    | 33.78     |
| 40            | 0.01               | 4.54     | 0.04       | 1.51    | 0.36      | 1.45       | 2.30     | 8.93        | 1.19      | 8.88      | 9.34       | 10.16    | 13.80     |
| 50            | 0.01               | 2.44     | 0.04       | 0.28    | 0.44      | 1.94       | 2.51     | 9.13        | 0.74      | 16.61     | 16.97      | 9.39     | 19.40     |
| 60            | 0.00               | 28.26    | 0.13       | 1.63    | 0.71      | 9.98       | 2.56     | 7.73        | 3.34      | 63.58     | 65.40      | 27.27    | 70.86     |
| 100           | 5.15               | 48.78    | 0.11       | 1.41    | 0.39      | 10.52      | 1.78     | 7.90        | 0.18      | 40.77     | 48.20      | 43.56    | 64.97     |
| 110           | 24.60              | 35.85    | 0.08       | 1.82    | 0.44      | 7.28       | 1.86     | 8.76        | 6.70      | 29.68     | 35.46      | 33.02    | 48.45     |
| 120           | 51.73              | 25.56    | 0.04       | 2.21    | 0.47      | 4.19       | 2.27     | 9.52        | 9.56      | 15.59     | 22.16      | 24.79    | 33.25     |
| 130           | 97.90              | 25.25    | 0.03       | 2.00    | 0.29      | 3.15       | 1.79     | 9.70        | 5.97      | 8.80      | 16.49      | 24.29    | 29.36     |
| 140           | 151.51             | 21.94    | 0.03       | 1.54    | 0.17      | 1.93       | 1.33     | 9.65        | 3.95      | 5.74      | 12.36      | 21.87    | 25.12     |
| 150           | 188.52             | 22.22    | 0.03       | 0.99    | 0.18      | 1.81       | 0.99     | 9.34        | 2.41      | 6.26      | 12.14      | 22.00    | 25.12     |

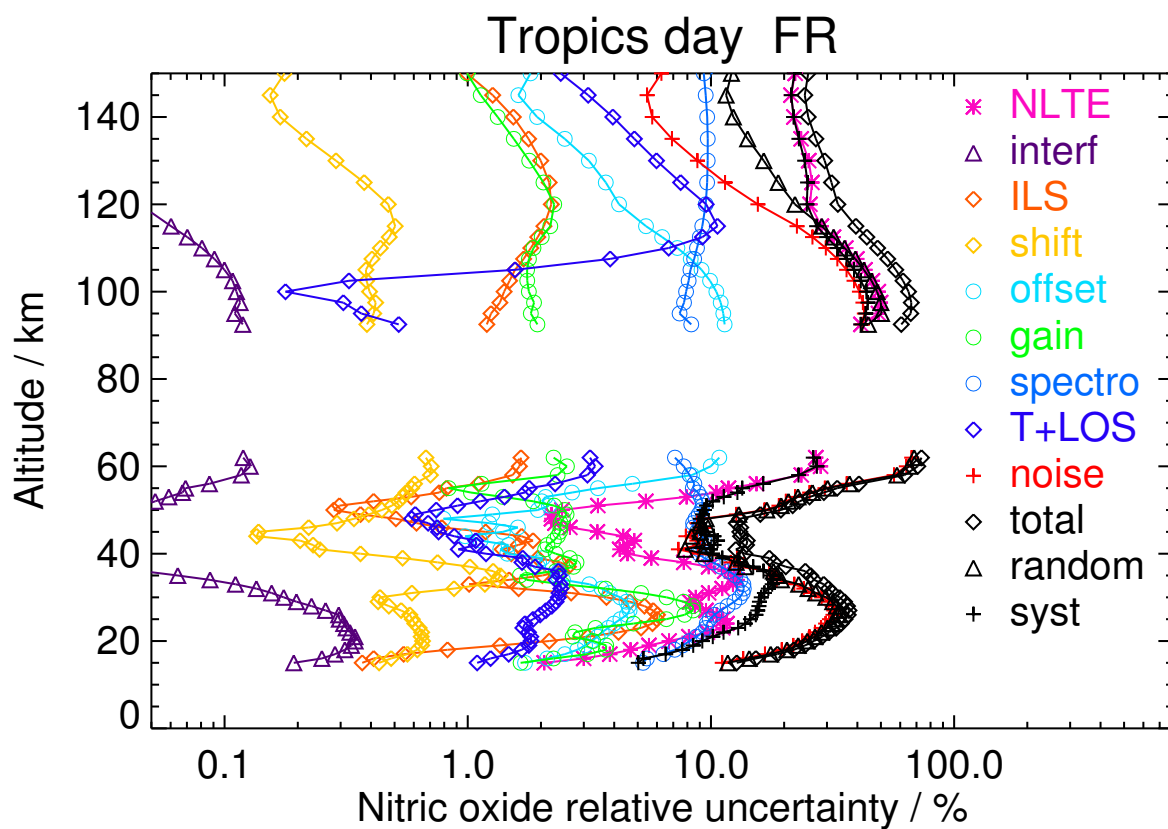

**Figure S17.** V8H\_NO\_61 Tropics day

**Table S19.** Nitric oxide error budget for Tropics night. All uncertainties are  $1\sigma$ .

| altitude (km) | mean target (ppmv) | NLTE (%) | interf (%) | ILS (%) | shift (%) | offset (%) | gain (%) | spectro (%) | T+LOS (%) | noise (%) | random (%) | syst (%) | total (%) |
|---------------|--------------------|----------|------------|---------|-----------|------------|----------|-------------|-----------|-----------|------------|----------|-----------|
| 60            | 0.00               | 9.02     | 0.21       | 0.54    | 1.16      | 12.13      | 2.47     | 15.07       | 4.49      | 82.66     | 84.76      | 11.53    | 85.54     |
| 100           | 2.64               | 21.45    | 0.18       | 0.86    | 0.76      | 12.23      | 2.15     | 9.91        | 0.47      | 44.62     | 48.30      | 19.28    | 52.01     |
| 110           | 16.51              | 17.55    | 0.13       | 0.96    | 0.53      | 8.00       | 1.37     | 9.13        | 5.63      | 29.43     | 32.96      | 16.43    | 36.83     |
| 120           | 39.26              | 15.54    | 0.05       | 1.19    | 0.22      | 3.19       | 1.05     | 8.86        | 8.60      | 11.02     | 17.17      | 15.28    | 22.98     |
| 130           | 50.53              | 16.63    | 0.04       | 1.23    | 0.21      | 2.34       | 1.22     | 8.72        | 6.33      | 7.73      | 14.04      | 16.24    | 21.47     |
| 140           | 59.55              | 17.01    | 0.04       | 1.17    | 0.32      | 2.67       | 1.17     | 8.38        | 5.02      | 9.86      | 14.76      | 16.55    | 22.18     |
| 150           | 58.56              | 17.29    | 0.05       | 1.05    | 0.40      | 3.33       | 1.16     | 7.84        | 3.93      | 12.07     | 16.32      | 16.40    | 23.14     |

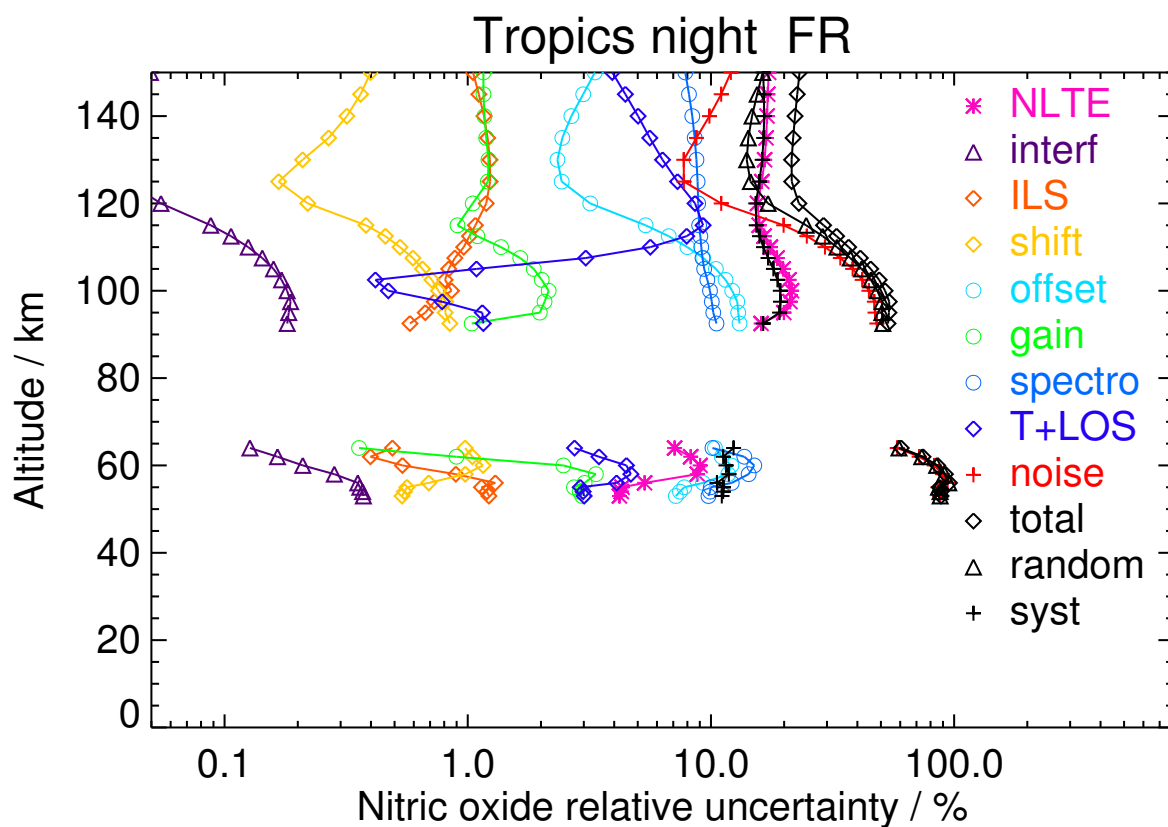

**Figure S18.** V8H\_NO\_61 Tropics night

**Table S20.** Nitric oxide error budget for Southern midlatitude winter day. All uncertainties are  $1\sigma$ .

| altitude (km) | mean target (ppmv) | NLTE (%) | interf (%) | ILS (%) | shift (%) | offset (%) | gain (%) | spectro (%) | T+LOS (%) | noise (%) | random (%) | syst (%) | total (%) |
|---------------|--------------------|----------|------------|---------|-----------|------------|----------|-------------|-----------|-----------|------------|----------|-----------|
| 20            | 0.00               | 10.27    | 0.18       | 7.85    | 0.39      | 3.36       | 3.55     | 11.96       | 1.41      | 21.78     | 26.64      | 10.03    | 28.47     |
| 30            | 0.01               | 13.96    | 0.32       | 10.87   | 1.38      | 7.07       | 4.58     | 12.32       | 2.01      | 35.59     | 40.73      | 12.23    | 42.53     |
| 40            | 0.01               | 12.65    | 0.09       | 3.00    | 1.00      | 4.06       | 3.11     | 11.04       | 2.19      | 22.97     | 26.39      | 12.42    | 29.16     |
| 50            | 0.01               | 9.81     | 0.05       | 0.94    | 0.69      | 2.08       | 2.93     | 10.70       | 1.60      | 16.44     | 20.02      | 9.86     | 22.31     |
| 60            | 0.02               | 31.42    | 0.05       | 2.51    | 0.86      | 6.16       | 1.79     | 12.77       | 1.69      | 37.69     | 47.75      | 18.48    | 51.20     |
| 70            | 0.04               | 34.98    | 0.06       | 1.59    | 0.29      | 7.50       | 2.23     | 8.42        | 0.07      | 25.57     | 35.07      | 27.97    | 44.86     |
| 80            | 0.20               | 69.37    | 0.06       | 1.17    | 0.29      | 8.59       | 3.26     | 9.68        | 1.21      | 28.14     | 60.75      | 45.76    | 76.06     |
| 90            | 2.32               | 54.27    | 0.07       | 2.08    | 0.53      | 7.59       | 3.33     | 11.09       | 0.11      | 26.55     | 49.45      | 37.43    | 62.02     |
| 100           | 12.02              | 71.66    | 0.09       | 1.63    | 0.38      | 7.71       | 4.03     | 9.37        | 0.32      | 26.28     | 53.82      | 55.65    | 77.42     |
| 110           | 66.01              | 59.76    | 0.06       | 1.60    | 0.32      | 4.35       | 3.29     | 9.07        | 6.32      | 16.01     | 51.23      | 36.85    | 63.11     |
| 120           | 172.45             | 54.26    | 0.05       | 2.38    | 0.39      | 3.83       | 2.19     | 10.04       | 8.11      | 12.14     | 49.22      | 29.34    | 57.30     |
| 130           | 341.82             | 83.05    | 0.02       | 3.87    | 0.27      | 2.78       | 1.00     | 13.87       | 5.14      | 7.48      | 72.83      | 43.50    | 84.83     |
| 140           | 455.13             | 88.22    | 0.03       | 5.12    | 0.15      | 1.65       | 1.27     | 17.53       | 3.01      | 5.34      | 83.89      | 33.47    | 90.32     |
| 150           | 496.26             | 82.70    | 0.03       | 2.19    | 0.38      | 1.86       | 1.30     | 18.47       | 1.51      | 6.78      | 76.37      | 37.50    | 85.08     |

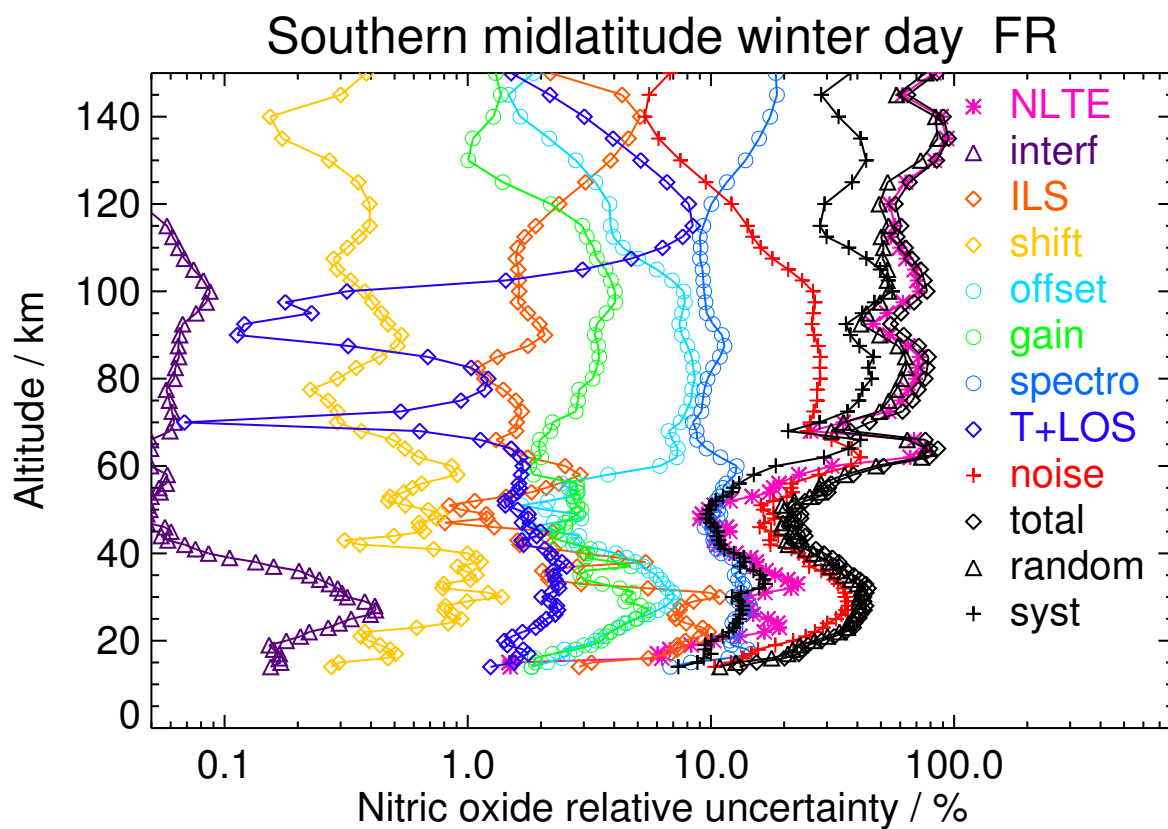

**Figure S19.** V8H\_NO\_61 Southern midlatitude winter day

**Table S21.** Nitric oxide error budget for Southern midlatitude winter night. All uncertainties are  $1\sigma$ .

| altitude (km) | mean target (ppmv) | NLTE (%) | interf (%) | ILS (%) | shift (%) | offset (%) | gain (%) | spectro (%) | T+LOS (%) | noise (%) | random (%) | syst (%) | total (%) |
|---------------|--------------------|----------|------------|---------|-----------|------------|----------|-------------|-----------|-----------|------------|----------|-----------|
| 50            | 0.00               | 22.11    | 0.20       | 1.28    | 0.68      | 4.82       | 3.15     | 14.61       | 2.17      | 53.23     | 56.07      | 20.76    | 59.80     |
| 60            | 0.02               | 44.89    | 0.11       | 3.77    | 1.84      | 7.54       | 10.87    | 27.72       | 3.43      | 43.31     | 65.70      | 23.40    | 69.74     |
| 70            | 0.07               | 46.23    | 0.13       | 1.15    | 0.27      | 8.94       | 5.54     | 13.17       | 0.91      | 35.70     | 53.90      | 28.16    | 60.81     |
| 80            | 0.31               | 60.19    | 0.12       | 1.73    | 0.46      | 9.66       | 2.23     | 14.10       | 0.99      | 31.43     | 59.22      | 37.50    | 70.09     |
| 90            | 2.83               | 39.93    | 0.12       | 1.87    | 0.56      | 9.70       | 2.54     | 14.71       | 0.41      | 34.17     | 49.33      | 25.50    | 55.53     |
| 100           | 10.46              | 66.13    | 0.14       | 1.44    | 0.41      | 8.81       | 4.57     | 15.39       | 3.37      | 28.84     | 56.85      | 48.18    | 74.53     |
| 110           | 59.16              | 56.72    | 0.11       | 2.20    | 0.47      | 5.15       | 5.57     | 16.36       | 10.67     | 18.36     | 52.27      | 35.58    | 63.23     |
| 120           | 153.75             | 62.12    | 0.12       | 2.83    | 0.90      | 4.25       | 6.68     | 14.22       | 9.31      | 13.48     | 57.27      | 33.48    | 66.34     |
| 130           | 254.81             | 58.41    | 0.10       | 2.59    | 0.39      | 2.76       | 4.46     | 12.22       | 5.48      | 7.96      | 52.60      | 30.37    | 60.73     |
| 140           | 315.26             | 39.17    | 0.09       | 2.10    | 0.19      | 1.88       | 3.61     | 13.63       | 3.35      | 6.32      | 33.86      | 25.40    | 42.33     |
| 150           | 339.80             | 68.02    | 0.08       | 1.46    | 0.18      | 2.75       | 2.73     | 16.18       | 1.94      | 8.16      | 60.91      | 35.57    | 70.54     |

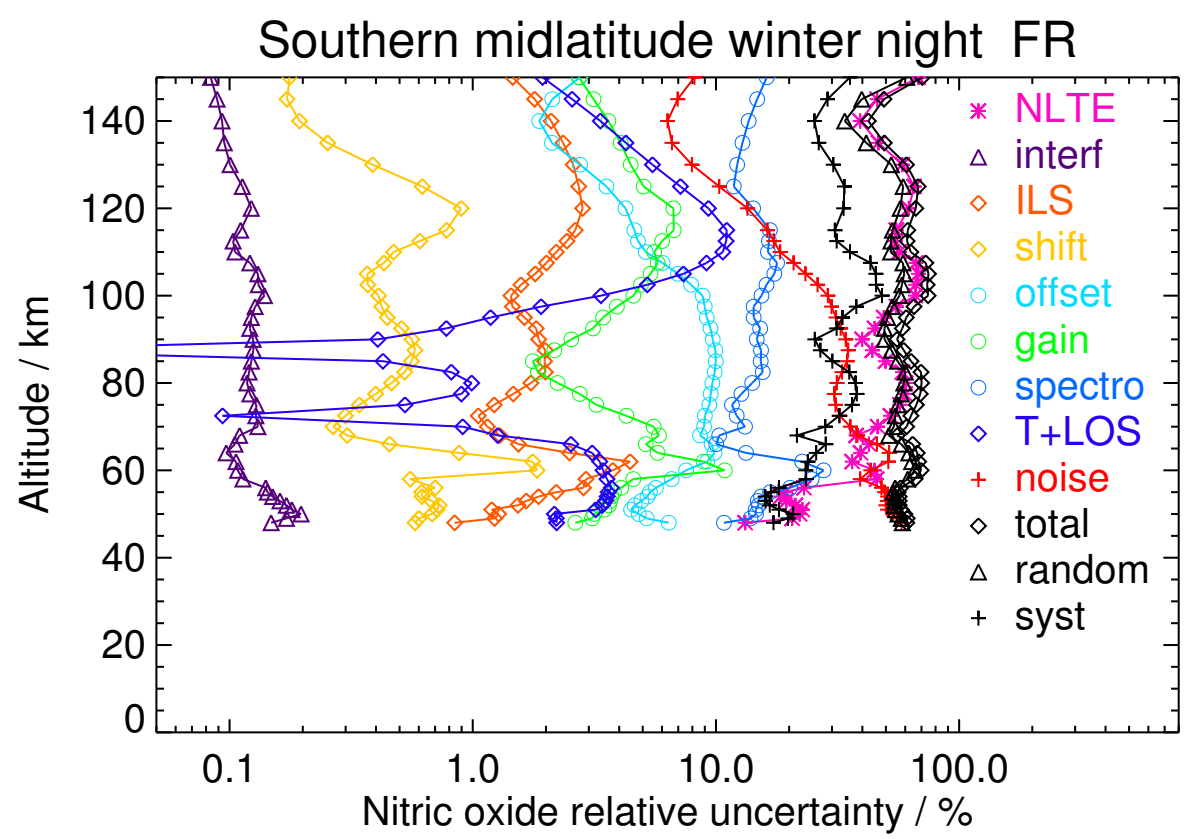

**Figure S20.** V8H\_NO\_61 Southern midlatitude winter night



**Table S22.** Nitric oxide error budget for Southern midlatitude spring day. All uncertainties are  $1\sigma$ .

| altitude (km) | mean target (ppmv) | NLTE (%) | interf (%) | ILS (%) | shift (%) | offset (%) | gain (%) | spectro (%) | T+LOS (%) | noise (%) | random (%) | syst (%) | total (%) |
|---------------|--------------------|----------|------------|---------|-----------|------------|----------|-------------|-----------|-----------|------------|----------|-----------|
| 20            | 0.00               | 21.67    | 0.22       | 7.27    | 1.46      | 2.92       | 6.34     | 12.82       | 2.25      | 22.95     | 32.96      | 13.52    | 35.63     |
| 30            | 0.01               | 23.67    | 0.14       | 5.44    | 1.08      | 3.32       | 2.53     | 11.77       | 2.11      | 23.32     | 32.13      | 16.22    | 35.99     |
| 40            | 0.01               | 9.88     | 0.04       | 2.93    | 0.87      | 2.24       | 2.56     | 9.16        | 1.64      | 14.70     | 16.83      | 11.75    | 20.53     |
| 50            | 0.01               | 29.59    | 0.06       | 3.71    | 2.44      | 2.22       | 2.12     | 9.28        | 2.01      | 16.89     | 32.37      | 15.23    | 35.78     |
| 60            | 0.02               | 34.52    | 0.08       | 9.47    | 3.68      | 6.22       | 2.74     | 18.19       | 2.08      | 38.14     | 51.62      | 21.60    | 55.96     |
| 70            | 0.02               | >100     | 0.10       | 2.71    | 1.17      | 8.50       | 2.59     | 9.65        | <0.01     | 33.19     | 34.29      | >100     | >100      |
| 90            | 3.83               | >100     | 0.10       | 7.28    | 8.12      | 4.60       | 3.85     | 13.80       | 0.04      | 17.64     | >100       | 74.41    | >100      |
| 100           | 17.45              | 81.91    | 0.09       | 8.10    | 1.91      | 6.55       | 2.35     | 19.69       | <0.01     | 24.36     | 83.27      | 29.56    | 88.36     |
| 110           | 85.52              | >100     | 0.11       | 9.17    | 2.29      | 5.21       | 2.42     | 12.15       | 17.75     | 18.66     | >100       | >100     | >100      |
| 120           | 209.89             | 58.61    | 0.04       | 3.01    | 1.24      | 2.53       | 1.33     | 11.24       | 11.38     | 9.58      | 52.38      | 32.53    | 61.66     |
| 130           | 386.82             | >100     | 0.05       | 4.87    | 1.73      | 2.38       | 0.78     | 10.48       | 4.81      | 6.70      | 84.58      | 62.38    | >100      |
| 140           | 709.47             | >100     | 0.06       | 7.75    | 0.65      | 1.92       | 1.30     | 15.56       | 2.61      | 5.57      | >100       | 61.26    | >100      |
| 150           | 1000.92            | 90.67    | 0.06       | 6.34    | 1.48      | 1.48       | 1.87     | 29.21       | 1.77      | 5.61      | 87.35      | 39.09    | 95.69     |

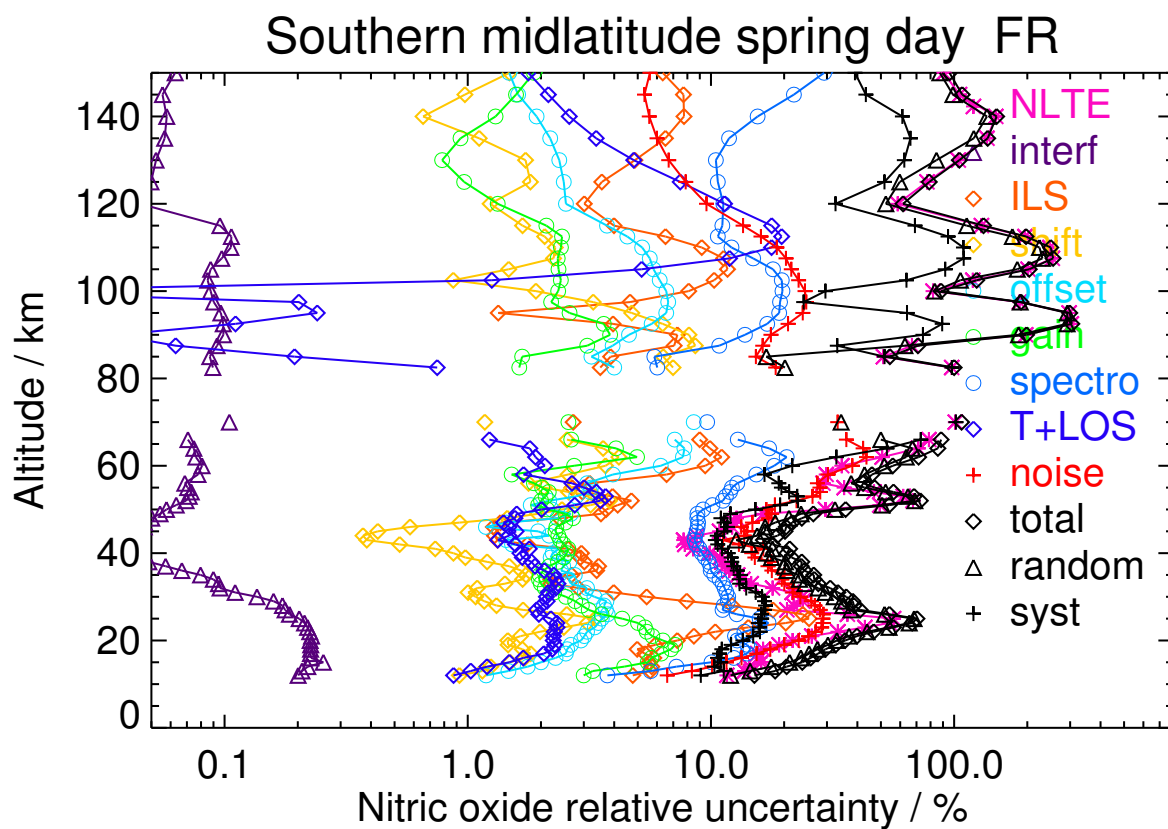

**Figure S21.** V8H\_NO\_61 Southern midlatitude spring day

**Table S23.** Nitric oxide error budget for Southern midlatitude spring night. All uncertainties are  $1\sigma$ .

| altitude (km) | mean target (ppmv) | NLTE (%) | interf (%) | ILS (%) | shift (%) | offset (%) | gain (%) | spectro (%) | T+LOS (%) | noise (%) | random (%) | syst (%) | total (%) |
|---------------|--------------------|----------|------------|---------|-----------|------------|----------|-------------|-----------|-----------|------------|----------|-----------|
| 60            | 0.04               | 29.83    | 0.19       | 2.87    | 1.42      | 5.45       | 7.31     | 16.67       | 2.17      | 29.93     | 43.12      | 17.38    | 46.49     |
| 80            | 0.13               | 25.36    | 0.13       | 0.72    | 0.58      | 9.98       | 1.34     | 6.13        | 0.14      | 38.85     | 40.12      | 26.13    | 47.88     |
| 90            | 0.77               | 70.61    | 0.14       | 1.91    | 1.10      | 10.03      | 1.37     | 8.72        | 0.17      | 36.16     | 79.54      | 12.27    | 80.48     |
| 100           | 12.13              | 82.03    | 0.13       | 1.76    | 0.98      | 7.94       | 1.69     | 8.93        | 0.43      | 27.76     | 86.50      | 12.95    | 87.46     |
| 110           | 82.34              | 55.24    | 0.12       | 0.75    | 1.38      | 4.89       | 2.37     | 9.58        | 7.80      | 17.79     | 54.16      | 24.89    | 59.60     |
| 120           | 283.20             | >100     | 0.09       | 5.84    | 0.35      | 2.39       | 4.02     | 21.39       | 8.84      | 8.45      | >100       | 34.37    | >100      |
| 130           | 296.54             | 53.29    | 0.12       | 2.82    | 1.89      | 2.03       | 3.42     | 17.88       | 4.32      | 6.64      | 49.93      | 27.52    | 57.01     |
| 140           | 277.00             | 94.85    | 0.11       | 2.86    | 0.66      | 1.71       | 3.13     | 13.74       | 2.74      | 6.48      | 91.43      | 29.95    | 96.21     |
| 150           | 250.74             | 85.06    | 0.10       | 2.21    | 0.56      | 2.52       | 3.05     | 14.17       | 1.71      | 8.29      | 75.92      | 42.01    | 86.76     |

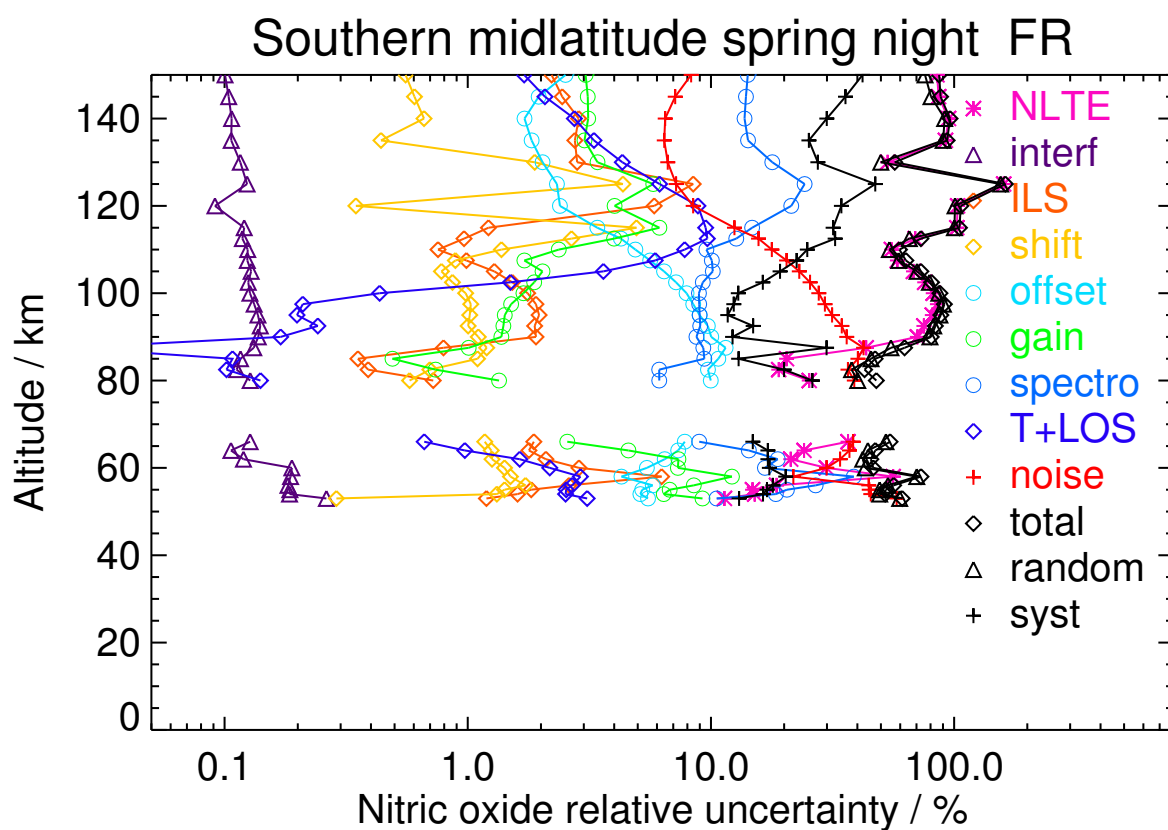

**Figure S22.** V8H\_NO\_61 Southern midlatitude spring night

**Table S24.** Nitric oxide error budget for Southern midlatitude summer day. All uncertainties are  $1\sigma$ .

| altitude<br>(km) | mean target<br>(ppmv) | NLTE<br>(%) | interf<br>(%) | ILS<br>(%) | shift<br>(%) | offset<br>(%) | gain<br>(%) | spectro<br>(%) | T+LOS<br>(%) | noise<br>(%) | random<br>(%) | syst<br>(%) | total<br>(%) |
|------------------|-----------------------|-------------|---------------|------------|--------------|---------------|-------------|----------------|--------------|--------------|---------------|-------------|--------------|
| 20               | 0.00                  | 9.25        | 0.15          | 12.42      | 1.09         | 3.08          | 5.68        | 8.39           | 1.91         | 23.07        | 24.89         | 16.42       | 29.82        |
| 30               | 0.01                  | 9.17        | 0.09          | 2.14       | 0.46         | 2.26          | 2.34        | 11.25          | 2.62         | 19.77        | 20.79         | 13.84       | 24.98        |
| 40               | 0.01                  | 4.64        | 0.03          | 2.53       | 0.66         | 1.58          | 2.91        | 8.68           | 1.28         | 9.56         | 10.12         | 10.26       | 14.42        |
| 50               | 0.01                  | 3.59        | 0.05          | 0.42       | 0.55         | 0.82          | 2.74        | 8.72           | 0.65         | 9.13         | 9.64          | 9.41        | 13.47        |
| 60               | 0.01                  | 38.78       | 0.10          | 3.02       | 1.71         | 9.12          | 2.64        | 10.65          | 1.30         | 52.98        | 60.47         | 29.51       | 67.29        |
| 90               | 1.68                  | 40.22       | 0.13          | 0.93       | 1.09         | 10.75         | 4.55        | 6.28           | 0.69         | 39.19        | 46.08         | 34.76       | 57.72        |
| 100              | 14.42                 | 59.64       | 0.12          | 1.42       | 1.26         | 9.23          | 2.33        | 9.24           | 0.99         | 33.38        | 43.90         | 54.08       | 69.65        |
| 110              | 64.81                 | 76.64       | 0.08          | 1.12       | 0.46         | 6.14          | 1.44        | 8.65           | 10.16        | 20.13        | 51.31         | 62.17       | 80.61        |
| 120              | 125.58                | 35.30       | 0.04          | 1.78       | 0.54         | 2.78          | 1.29        | 8.21           | 8.95         | 10.02        | 27.87         | 27.03       | 38.82        |
| 130              | 226.56                | 57.18       | 0.04          | 3.16       | 0.35         | 3.47          | 1.05        | 8.93           | 6.34         | 8.90         | 33.63         | 48.59       | 59.09        |
| 140              | 385.26                | 56.97       | 0.04          | 3.31       | 0.19         | 2.97          | 0.68        | 9.58           | 4.61         | 7.29         | 35.84         | 46.34       | 58.58        |
| 150              | 487.23                | 38.03       | 0.03          | 2.33       | 0.24         | 1.68          | 0.71        | 9.67           | 2.95         | 4.98         | 23.65         | 31.98       | 39.77        |

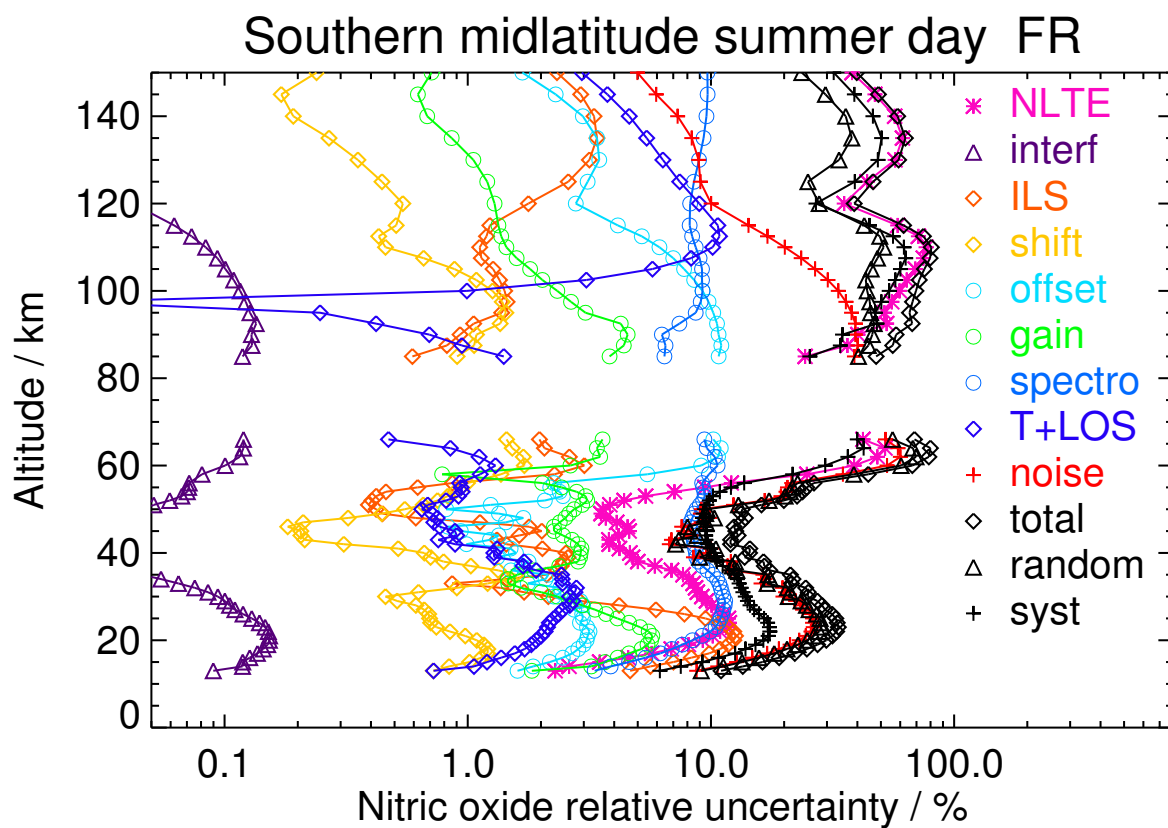

**Figure S23.** V8H\_NO\_61 Southern midlatitude summer day

**Table S25.** Nitric oxide error budget for Southern midlatitude summer night. All uncertainties are  $1\sigma$ .

| altitude (km) | mean target (ppmv) | NLTE (%) | interf (%) | ILS (%) | shift (%) | offset (%) | gain (%) | spectro (%) | T+LOS (%) | noise (%) | random (%) | syst (%) | total (%) |
|---------------|--------------------|----------|------------|---------|-----------|------------|----------|-------------|-----------|-----------|------------|----------|-----------|
| 40            | 0.00               | 4.59     | 0.21       | 0.39    | 0.56      | 3.80       | 4.84     | 3.43        | 1.25      | 33.21     | 33.75      | 6.05     | 34.29     |
| 50            | 0.00               | 2.07     | 0.12       | 0.50    | 0.25      | 2.46       | 0.41     | 3.62        | 0.79      | 20.90     | 21.16      | 3.71     | 21.48     |
| 60            | 0.00               | 23.42    | 0.22       | 1.34    | 0.67      | 11.09      | 2.25     | 9.46        | 1.34      | 72.78     | 75.27      | 20.02    | 77.89     |
| 100           | 9.04               | 55.73    | 0.24       | 0.88    | 0.87      | 10.27      | 5.66     | 11.87       | 3.24      | 34.07     | 53.29      | 41.43    | 67.50     |
| 110           | 38.65              | 40.32    | 0.12       | 1.20    | 0.35      | 6.77       | 2.32     | 9.39        | 8.19      | 23.83     | 38.54      | 30.27    | 49.00     |
| 120           | 90.19              | 27.30    | 0.10       | 1.77    | 0.44      | 3.22       | 4.20     | 9.19        | 7.98      | 11.66     | 22.80      | 23.26    | 32.57     |
| 130           | 126.14             | 34.51    | 0.10       | 1.93    | 0.25      | 2.94       | 4.61     | 10.02       | 6.08      | 8.16      | 25.51      | 27.89    | 37.80     |
| 140           | 166.58             | 32.69    | 0.08       | 1.74    | 0.15      | 2.12       | 3.57     | 10.30       | 4.61      | 6.85      | 23.35      | 26.80    | 35.54     |
| 150           | 178.28             | 32.76    | 0.06       | 1.30    | 0.32      | 2.10       | 2.61     | 9.98        | 3.25      | 7.64      | 23.21      | 26.77    | 35.43     |

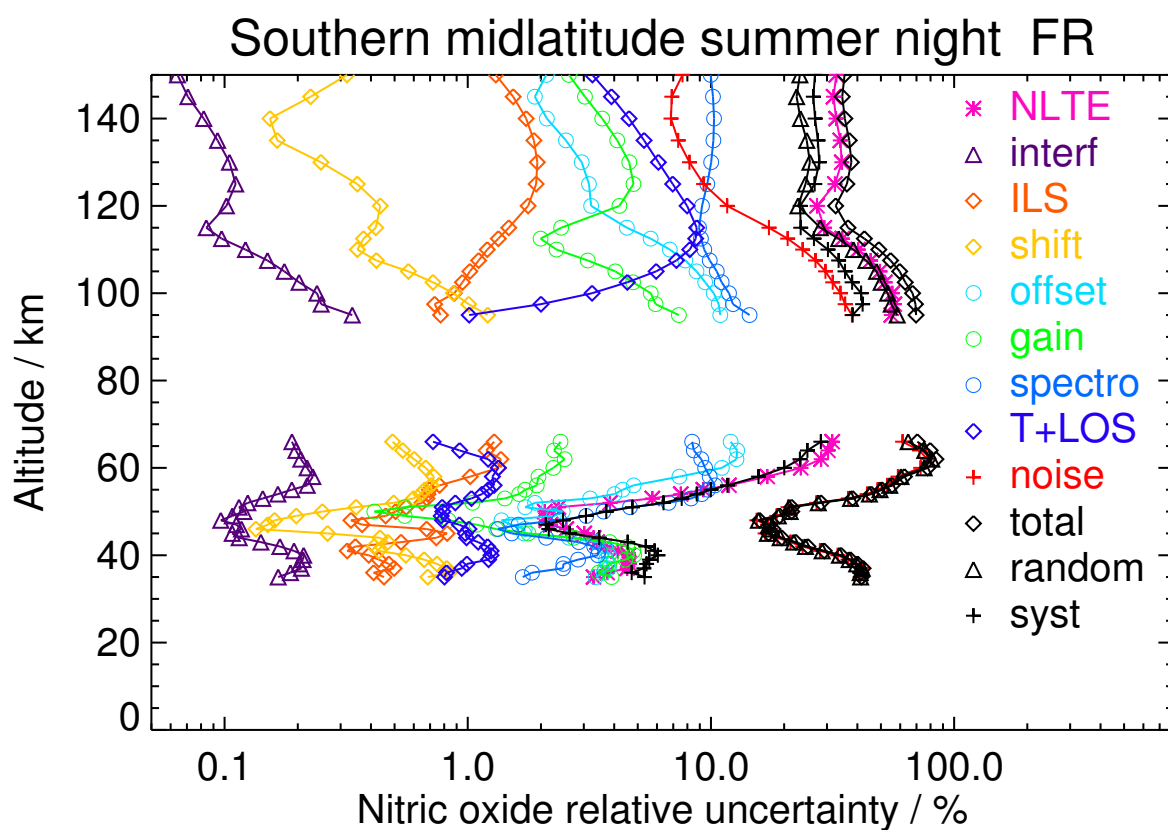

**Figure S24.** V8H\_NO\_61 Southern midlatitude summer night

**Table S26.** Nitric oxide error budget for Southern midlatitude autumn day. All uncertainties are  $1\sigma$ .

| altitude (km) | mean target (ppmv) | NLTE (%) | interf (%) | ILS (%) | shift (%) | offset (%) | gain (%) | spectro (%) | T+LOS (%) | noise (%) | random (%) | syst (%) | total (%) |
|---------------|--------------------|----------|------------|---------|-----------|------------|----------|-------------|-----------|-----------|------------|----------|-----------|
| 20            | 0.00               | 6.24     | 0.22       | 5.50    | 0.45      | 3.57       | 7.60     | 7.95        | 1.86      | 24.45     | 26.05      | 11.20    | 28.36     |
| 30            | 0.00               | 15.01    | 0.17       | 3.50    | 0.75      | 5.13       | 3.91     | 13.03       | 2.17      | 28.77     | 31.80      | 16.46    | 35.80     |
| 40            | 0.01               | 10.73    | 0.05       | 3.06    | 0.51      | 3.02       | 3.22     | 10.40       | 1.51      | 18.72     | 21.22      | 12.43    | 24.60     |
| 50            | 0.01               | 7.88     | 0.06       | 0.56    | 0.73      | 1.80       | 1.90     | 9.24        | 1.08      | 21.64     | 23.25      | 9.17     | 24.99     |
| 60            | 0.01               | 35.89    | 0.04       | 1.98    | 2.43      | 7.50       | 8.51     | 26.44       | 2.27      | 37.63     | 57.08      | 16.98    | 59.55     |
| 70            | 0.04               | 78.79    | 0.28       | 3.14    | 0.41      | 10.73      | 6.67     | 4.85        | 0.16      | 37.55     | 39.09      | 79.27    | 88.38     |
| 80            | 0.12               | 96.88    | 0.11       | 1.98    | 0.42      | 12.34      | 2.64     | 10.03       | 0.70      | 42.94     | 83.04      | 67.81    | >100      |
| 90            | 1.41               | 75.39    | 0.09       | 1.40    | 0.47      | 10.27      | 2.09     | 11.63       | 0.48      | 36.22     | 65.06      | 54.87    | 85.11     |
| 100           | 10.50              | 70.28    | 0.08       | 1.02    | 0.41      | 8.38       | 2.36     | 9.74        | 0.09      | 28.63     | 53.99      | 54.93    | 77.02     |
| 110           | 66.67              | 53.50    | 0.05       | 1.33    | 0.29      | 4.99       | 2.10     | 9.21        | 7.88      | 17.34     | 43.17      | 38.44    | 57.80     |
| 120           | 176.79             | 35.51    | 0.04       | 2.34    | 0.29      | 3.35       | 1.07     | 9.33        | 8.35      | 11.17     | 28.75      | 27.09    | 39.50     |
| 130           | 231.54             | 45.76    | 0.03       | 2.85    | 0.17      | 2.86       | 1.17     | 11.95       | 4.62      | 7.28      | 34.59      | 33.65    | 48.26     |
| 140           | 256.25             | 34.63    | 0.03       | 2.27    | 0.21      | 1.80       | 1.39     | 12.59       | 2.74      | 6.08      | 26.87      | 26.28    | 37.59     |
| 150           | 267.82             | 38.25    | 0.04       | 1.39    | 0.31      | 2.28       | 1.43     | 12.24       | 1.53      | 7.63      | 28.58      | 29.42    | 41.02     |

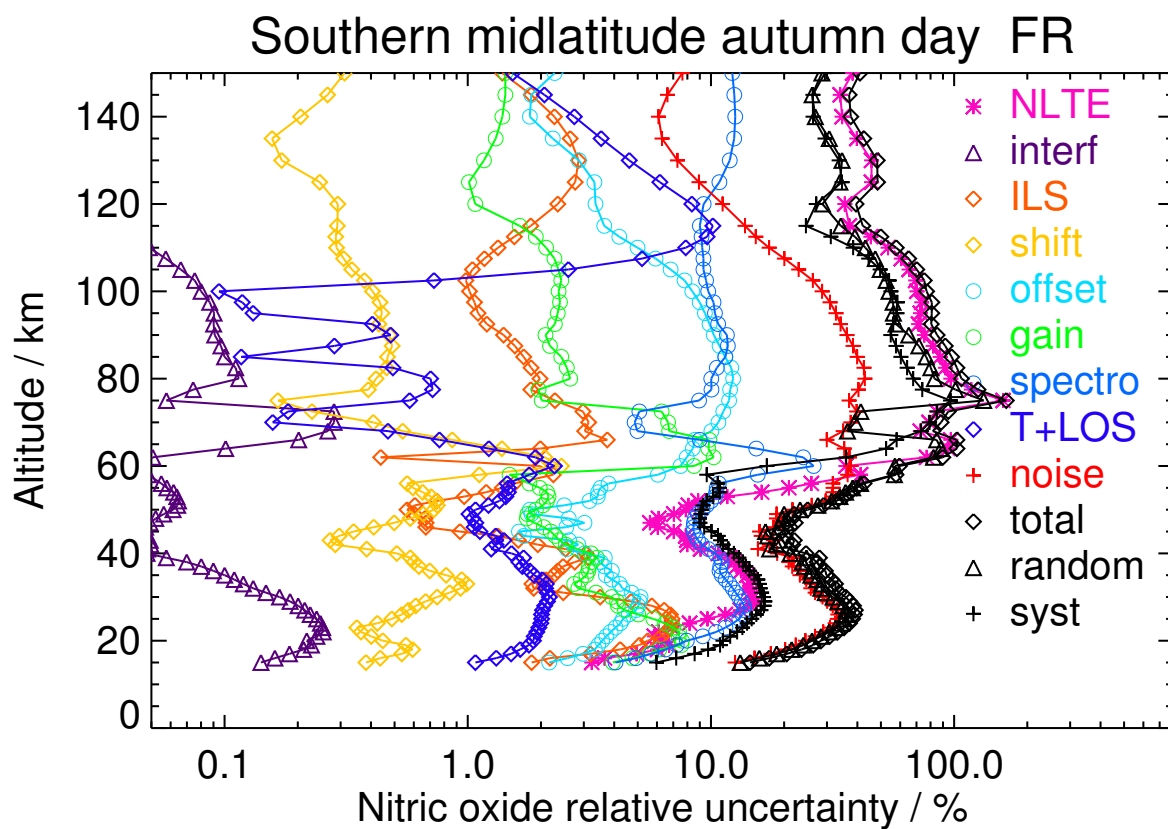

**Figure S25.** V8H\_NO\_61 Southern midlatitude autumn day

**Table S27.** Nitric oxide error budget for Southern midlatitude autumn night. All uncertainties are  $1\sigma$ .

| altitude (km) | mean target (ppmv) | NLTE (%) | interf (%) | ILS (%) | shift (%) | offset (%) | gain (%) | spectro (%) | T+LOS (%) | noise (%) | random (%) | syst (%) | total (%) |
|---------------|--------------------|----------|------------|---------|-----------|------------|----------|-------------|-----------|-----------|------------|----------|-----------|
| 60            | 0.01               | 32.14    | 0.23       | 0.93    | 0.64      | 13.73      | 8.80     | 10.22       | 4.44      | 80.55     | 85.03      | 26.13    | 88.96     |
| 70            | 0.04               | 23.02    | 0.13       | 0.53    | 0.53      | 11.20      | 3.54     | 18.49       | 0.80      | 47.69     | 54.03      | 19.15    | 57.32     |
| 80            | 0.19               | 29.92    | 0.19       | 0.75    | 0.28      | 11.81      | 8.38     | 12.36       | 0.54      | 39.05     | 47.86      | 22.20    | 52.76     |
| 90            | 2.06               | 15.23    | 0.12       | 0.84    | 0.58      | 10.74      | 3.88     | 9.01        | 1.00      | 34.89     | 38.05      | 14.66    | 40.78     |
| 100           | 9.05               | 33.87    | 0.11       | 0.87    | 0.51      | 9.20       | 2.94     | 11.26       | 0.76      | 30.08     | 42.23      | 22.14    | 47.68     |
| 110           | 38.19              | 44.63    | 0.10       | 1.01    | 0.24      | 5.95       | 3.75     | 11.96       | 9.93      | 20.30     | 45.83      | 24.40    | 51.92     |
| 120           | 78.42              | 32.61    | 0.14       | 1.61    | 0.42      | 3.50       | 7.22     | 13.20       | 10.08     | 12.77     | 34.07      | 20.19    | 39.61     |
| 130           | 97.63              | 41.19    | 0.16       | 1.92    | 0.43      | 2.72       | 8.08     | 13.78       | 5.81      | 9.12      | 39.76      | 22.35    | 45.61     |
| 140           | 104.06             | 34.78    | 0.15       | 1.39    | 0.31      | 2.22       | 7.03     | 13.36       | 3.60      | 8.22      | 33.75      | 19.65    | 39.05     |
| 150           | 99.60              | 46.53    | 0.14       | 0.72    | 0.21      | 2.95       | 6.12     | 12.89       | 2.28      | 9.36      | 43.54      | 23.99    | 49.71     |

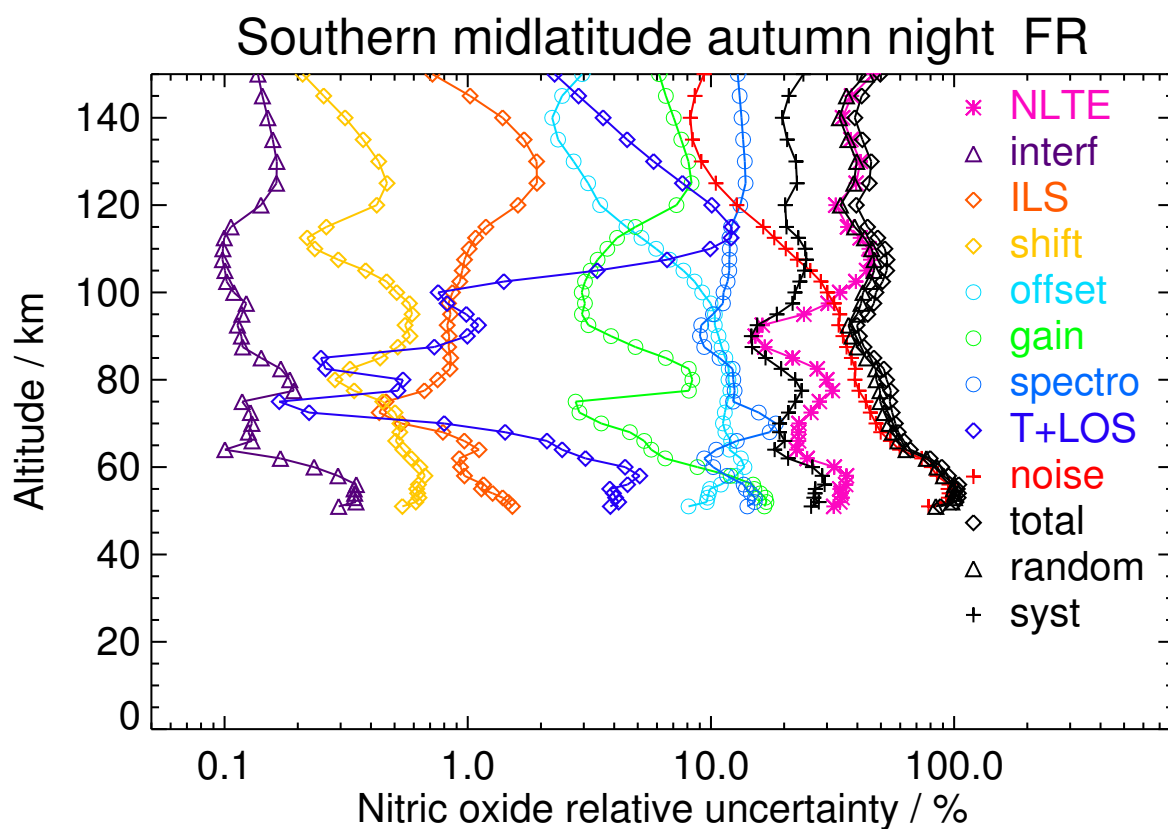

**Figure S26.** V8H\_NO\_61 Southern midlatitude autumn night

**Table S28.** Nitric oxide error budget for Southern polar winter day. All uncertainties are  $1\sigma$ .

| altitude (km) | mean target (ppmv) | NLTE (%) | interf (%) | ILS (%) | shift (%) | offset (%) | gain (%) | spectro (%) | T+LOS (%) | noise (%) | random (%) | syst (%) | total (%) |
|---------------|--------------------|----------|------------|---------|-----------|------------|----------|-------------|-----------|-----------|------------|----------|-----------|
| 30            | 0.01               | 25.11    | 0.11       | 5.72    | 1.10      | 6.56       | 1.90     | 11.39       | 2.20      | 36.31     | 44.71      | 12.84    | 46.52     |
| 40            | 0.01               | 6.57     | 0.03       | 1.80    | 0.59      | 2.89       | 3.07     | 9.93        | 2.53      | 17.25     | 19.27      | 9.78     | 21.61     |
| 50            | 0.01               | 11.00    | 0.04       | 1.12    | 0.62      | 2.29       | 1.88     | 9.36        | 2.14      | 16.39     | 19.96      | 9.69     | 22.19     |
| 60            | 0.03               | 23.93    | 0.05       | 1.12    | 0.55      | 6.75       | 4.86     | 14.68       | 3.05      | 38.86     | 43.75      | 21.55    | 48.77     |
| 70            | 0.16               | 72.10    | 0.06       | 2.41    | 0.35      | 9.54       | 1.73     | 11.06       | 0.07      | 34.21     | 66.87      | 46.04    | 81.19     |
| 80            | 0.88               | 44.06    | 0.06       | 0.91    | 0.43      | 8.71       | 1.11     | 9.58        | 1.14      | 28.14     | 39.08      | 37.11    | 53.89     |
| 90            | 11.79              | 87.23    | 0.06       | 1.75    | 1.06      | 6.78       | 1.56     | 13.63       | 0.05      | 23.46     | 88.13      | 25.12    | 91.64     |
| 100           | 54.69              | 33.20    | 0.05       | 1.77    | 0.37      | 4.89       | 0.78     | 8.02        | 0.20      | 17.26     | 36.73      | 11.98    | 38.63     |
| 110           | 232.17             | 27.41    | 0.04       | 2.36    | 0.23      | 3.55       | 1.10     | 8.92        | 9.30      | 14.02     | 26.98      | 20.13    | 33.66     |
| 120           | 412.52             | 39.29    | 0.03       | 2.66    | 0.20      | 3.78       | 0.92     | 8.30        | 10.99     | 11.28     | 31.23      | 30.13    | 43.39     |
| 130           | 574.46             | 62.03    | 0.02       | 2.81    | 0.29      | 2.45       | 0.65     | 9.71        | 4.06      | 6.57      | 52.97      | 34.79    | 63.37     |
| 140           | 695.18             | 50.05    | 0.01       | 2.93    | 0.19      | 1.62       | 0.77     | 12.91       | 1.75      | 5.35      | 45.27      | 25.80    | 52.11     |
| 150           | 805.13             | 60.93    | 0.01       | 2.02    | 0.36      | 2.04       | 0.98     | 16.43       | 1.52      | 6.21      | 54.36      | 32.81    | 63.50     |

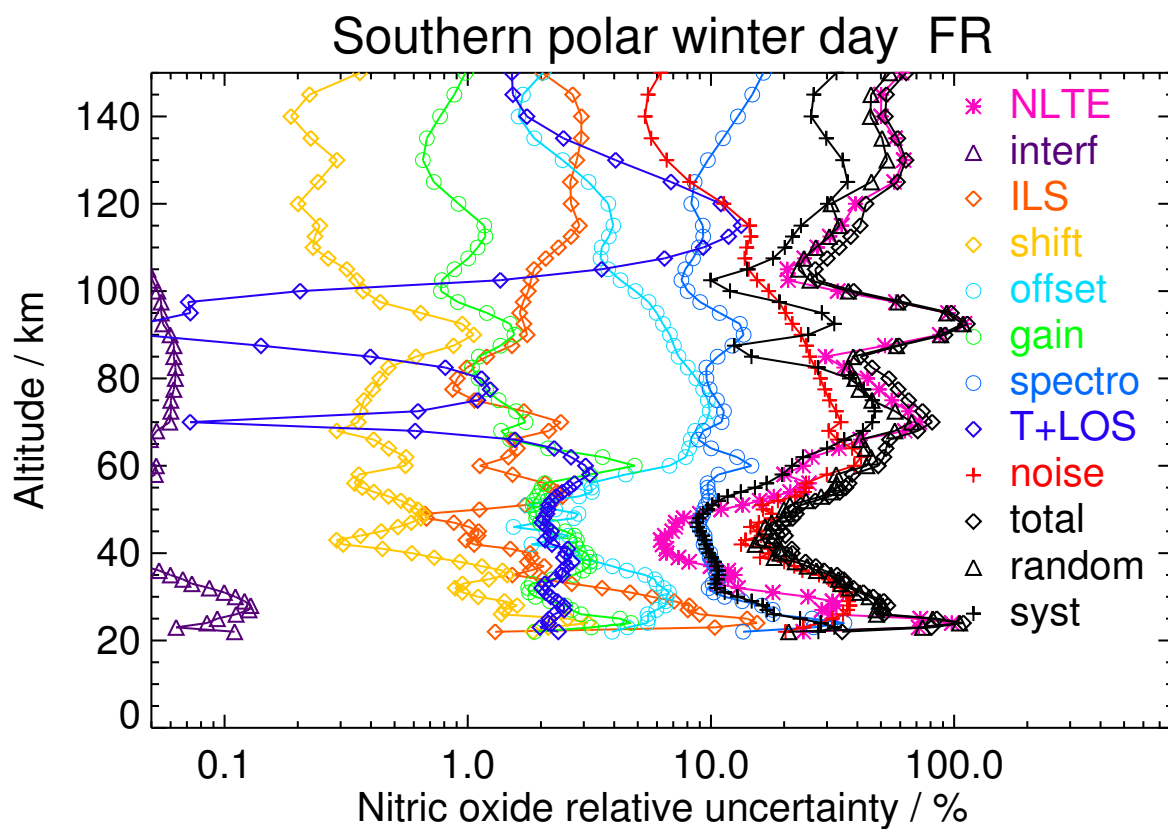

**Figure S27.** V8H\_NO\_61 Southern polar winter day

**Table S29.** Nitric oxide error budget for Southern polar winter night. All uncertainties are  $1\sigma$ .

| altitude (km) | mean target (ppmv) | NLTE (%) | interf (%) | ILS (%) | shift (%) | offset (%) | gain (%) | spectro (%) | T+LOS (%) | noise (%) | random (%) | syst (%) | total (%) |
|---------------|--------------------|----------|------------|---------|-----------|------------|----------|-------------|-----------|-----------|------------|----------|-----------|
| 50            | 0.01               | 16.42    | 0.10       | 0.69    | 0.96      | 3.85       | 1.46     | 12.34       | 2.34      | 35.51     | 38.34      | 15.39    | 41.31     |
| 60            | 0.03               | 47.66    | 0.12       | 3.75    | 0.59      | 8.60       | 4.48     | 10.60       | 6.25      | 49.99     | 60.51      | 36.99    | 70.92     |
| 70            | 0.37               | 51.61    | 0.12       | 2.67    | 0.69      | 11.47      | 7.73     | 13.80       | 4.54      | 40.13     | 54.96      | 40.79    | 68.44     |
| 80            | 1.82               | 35.11    | 0.14       | 1.40    | 0.48      | 9.26       | 1.52     | 7.49        | 0.99      | 30.83     | 45.84      | 15.17    | 48.28     |
| 90            | 16.08              | 45.71    | 0.19       | 1.31    | 0.63      | 8.96       | 2.53     | 7.71        | 1.87      | 27.71     | 45.68      | 30.37    | 54.86     |
| 100           | 43.07              | 31.58    | 0.15       | 0.72    | 0.32      | 6.95       | 1.74     | 7.54        | 1.21      | 21.80     | 35.91      | 17.13    | 39.79     |
| 110           | 139.62             | 32.73    | 0.12       | 1.38    | 0.35      | 5.22       | 1.54     | 9.57        | 8.71      | 17.73     | 33.59      | 21.37    | 39.81     |
| 120           | 331.87             | 37.79    | 0.07       | 1.99    | 0.30      | 3.71       | 1.65     | 10.31       | 10.42     | 10.87     | 30.29      | 29.39    | 42.21     |
| 130           | 471.98             | 34.10    | 0.08       | 1.61    | 0.28      | 2.52       | 1.28     | 8.78        | 5.21      | 6.46      | 26.92      | 24.39    | 36.33     |
| 140           | 522.89             | 30.24    | 0.08       | 1.31    | 0.21      | 1.87       | 1.00     | 8.60        | 3.04      | 5.77      | 25.22      | 20.03    | 32.20     |
| 150           | 518.31             | 35.01    | 0.07       | 0.96    | 0.14      | 2.58       | 0.83     | 8.41        | 1.62      | 7.00      | 26.11      | 25.97    | 36.83     |

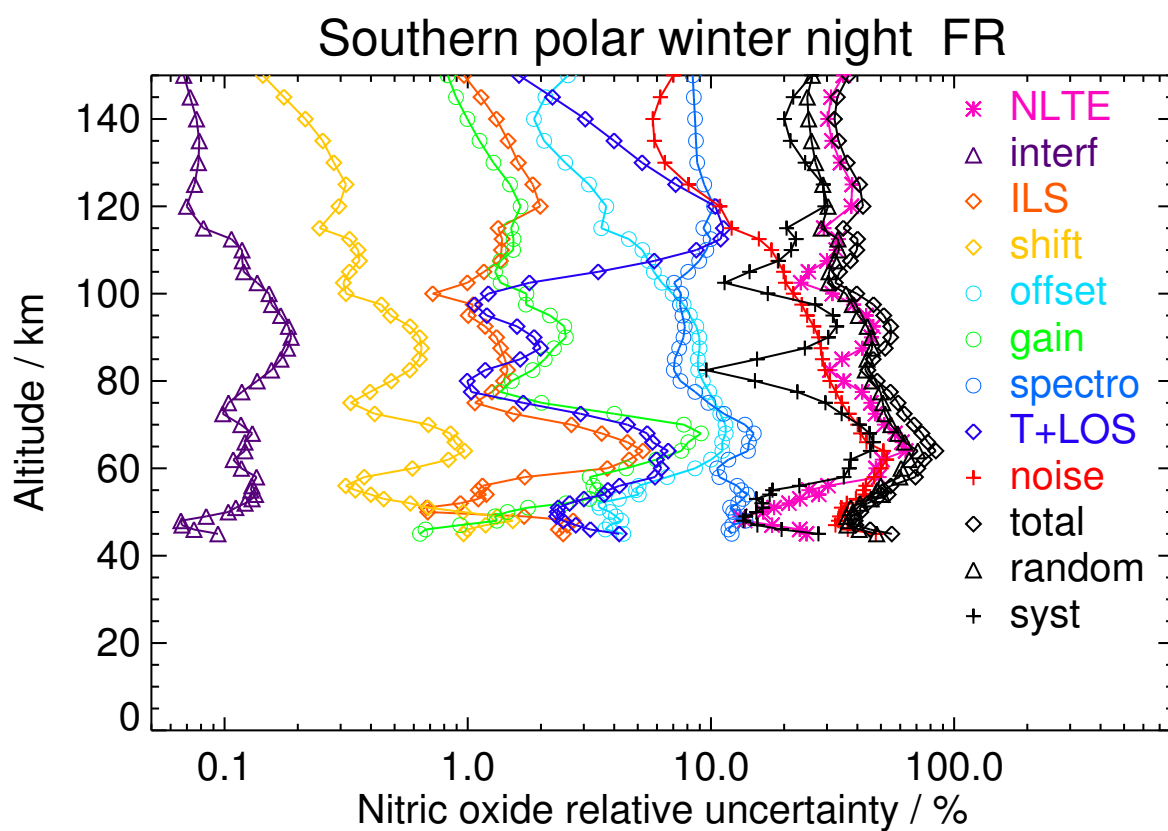

**Figure S28.** V8H\_NO\_61 Southern polar winter night



**Table S30.** Nitric oxide error budget for Southern polar spring day. All uncertainties are  $1\sigma$ .

| altitude (km) | mean target (ppmv) | NLTE (%) | interf (%) | ILS (%) | shift (%) | offset (%) | gain (%) | spectro (%) | T+LOS (%) | noise (%) | random (%) | syst (%) | total (%) |
|---------------|--------------------|----------|------------|---------|-----------|------------|----------|-------------|-----------|-----------|------------|----------|-----------|
| 20            | 0.00               | 11.14    | 0.43       | 3.18    | 0.75      | 2.47       | 3.51     | 8.05        | 2.78      | 22.16     | 24.54      | 10.73    | 26.78     |
| 30            | 0.01               | 3.78     | 0.07       | 1.26    | 0.79      | 1.59       | 2.13     | 9.44        | 1.99      | 13.46     | 14.38      | 9.54     | 17.26     |
| 40            | 0.01               | 2.95     | 0.03       | 1.93    | 0.36      | 1.06       | 2.06     | 8.23        | 0.82      | 7.08      | 7.81       | 8.69     | 11.68     |
| 50            | 0.01               | 8.26     | 0.06       | 0.68    | 0.85      | 2.01       | 1.69     | 8.89        | 0.84      | 13.96     | 15.73      | 10.17    | 18.73     |
| 60            | 0.01               | 31.16    | 0.10       | 3.60    | 1.45      | 6.32       | 1.63     | 12.46       | 1.80      | 43.02     | 50.36      | 22.40    | 55.11     |
| 90            | 1.32               | 41.89    | 0.14       | 0.77    | 1.58      | 10.74      | 1.41     | 9.36        | 0.12      | 41.38     | 59.87      | 9.51     | 60.62     |
| 100           | 25.39              | 39.00    | 0.16       | 0.71    | 1.39      | 9.13       | 1.83     | 10.34       | 0.45      | 34.72     | 49.70      | 21.27    | 54.06     |
| 110           | 131.73             | 91.69    | 0.09       | 1.20    | 0.74      | 5.93       | 1.27     | 9.60        | 9.70      | 20.54     | 56.20      | 76.78    | 95.15     |
| 120           | 265.44             | 51.44    | 0.03       | 2.51    | 0.54      | 2.22       | 1.37     | 10.04       | 8.95      | 8.43      | 43.96      | 31.29    | 53.96     |
| 130           | 446.86             | 80.27    | 0.03       | 3.97    | 0.52      | 2.62       | 1.07     | 11.44       | 5.00      | 7.26      | 57.41      | 58.14    | 81.71     |
| 140           | 604.77             | 58.02    | 0.03       | 3.19    | 0.21      | 1.83       | 1.20     | 11.80       | 3.00      | 5.41      | 43.53      | 40.79    | 59.66     |
| 150           | 632.98             | 43.74    | 0.02       | 1.30    | 0.34      | 1.61       | 0.99     | 10.42       | 1.58      | 5.35      | 33.96      | 30.08    | 45.37     |

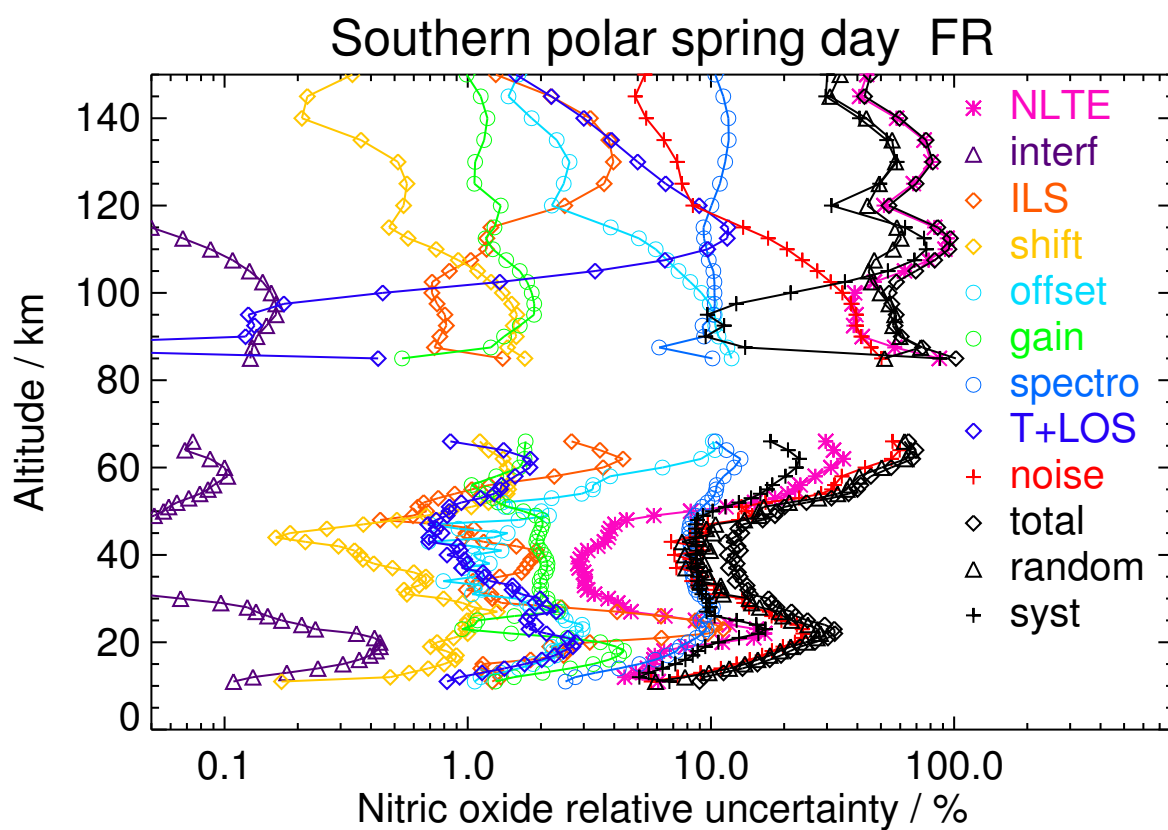

**Figure S29.** V8H\_NO\_61 Southern polar spring day

**Table S31.** Nitric oxide error budget for Southern polar spring night. All uncertainties are  $1\sigma$ .

| altitude (km) | mean target (ppmv) | NLTE (%) | interf (%) | ILS (%) | shift (%) | offset (%) | gain (%) | spectro (%) | T+LOS (%) | noise (%) | random (%) | syst (%) | total (%) |
|---------------|--------------------|----------|------------|---------|-----------|------------|----------|-------------|-----------|-----------|------------|----------|-----------|
| 30            | 0.00               | 8.66     | 0.37       | 3.23    | 0.82      | 5.64       | 2.44     | 5.08        | 1.15      | 30.20     | 31.52      | 8.34     | 32.60     |
| 40            | 0.00               | 3.96     | 0.10       | 0.73    | 0.22      | 1.13       | 0.35     | 3.76        | 0.97      | 12.91     | 13.78      | 3.09     | 14.12     |
| 50            | 0.00               | 18.74    | 0.17       | 1.93    | 1.29      | 3.27       | 2.10     | 12.04       | 1.38      | 26.57     | 32.36      | 13.33    | 35.00     |
| 60            | 0.02               | 28.06    | 0.23       | 4.27    | 1.11      | 6.52       | 9.05     | 31.45       | 1.97      | 39.60     | 55.18      | 21.17    | 59.10     |
| 70            | 0.02               | 14.71    | 0.22       | 0.33    | 1.00      | 10.07      | 0.40     | 6.88        | 0.28      | 37.74     | 39.08      | 16.24    | 42.32     |
| 90            | 1.50               | 49.29    | 0.31       | 1.90    | 1.64      | 11.77      | 4.13     | 15.87       | 0.15      | 44.32     | 66.18      | 20.69    | 69.34     |
| 100           | 23.55              | 55.88    | 0.27       | 1.30    | 1.39      | 9.37       | 3.84     | 15.88       | 0.43      | 34.61     | 62.30      | 28.26    | 68.41     |
| 110           | 117.25             | 77.94    | 0.11       | 0.92    | 1.09      | 5.73       | 1.34     | 13.99       | 10.49     | 19.70     | 69.68      | 44.15    | 82.49     |
| 120           | 217.81             | 48.78    | 0.09       | 2.45    | 0.73      | 2.59       | 1.87     | 10.60       | 8.28      | 9.88      | 43.51      | 27.96    | 51.72     |
| 130           | 258.44             | 45.78    | 0.12       | 2.05    | 0.40      | 2.32       | 2.27     | 11.26       | 4.07      | 7.15      | 34.74      | 33.14    | 48.01     |
| 140           | 293.33             | 36.86    | 0.11       | 1.48    | 0.23      | 1.74       | 2.09     | 11.86       | 2.47      | 6.36      | 27.17      | 28.59    | 39.44     |
| 150           | 292.79             | 50.27    | 0.10       | 1.04    | 0.36      | 2.42       | 1.85     | 11.89       | 1.42      | 8.14      | 37.34      | 36.79    | 52.42     |

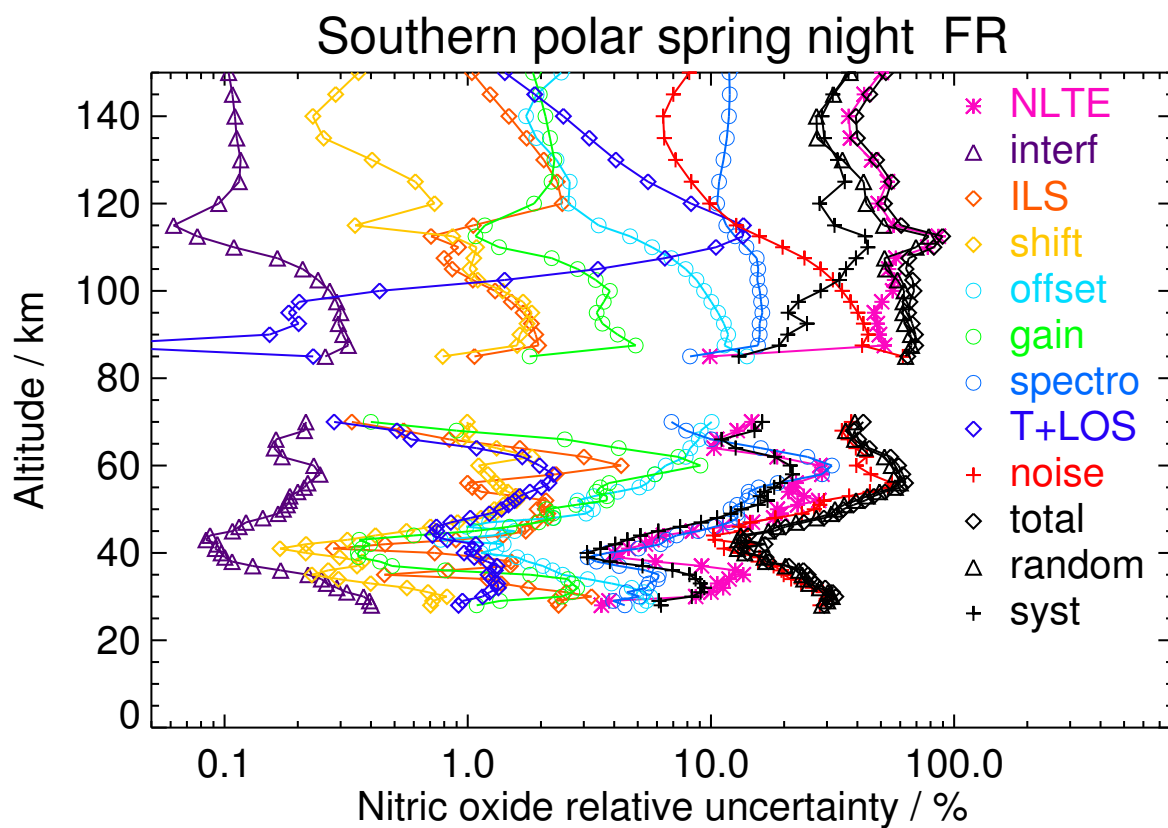

**Figure S30.** V8H\_NO\_61 Southern polar spring night

**Table S32.** Nitric oxide error budget for Southern polar summer day. All uncertainties are  $1\sigma$ .

| altitude (km) | mean target (ppmv) | NLTE (%) | interf (%) | ILS (%) | shift (%) | offset (%) | gain (%) | spectro (%) | T+LOS (%) | noise (%) | random (%) | syst (%) | total (%) |
|---------------|--------------------|----------|------------|---------|-----------|------------|----------|-------------|-----------|-----------|------------|----------|-----------|
| 20            | 0.00               | 5.62     | 0.13       | 11.25   | 0.90      | 2.19       | 2.74     | 10.36       | 2.21      | 19.29     | 20.54      | 15.30    | 25.61     |
| 30            | 0.01               | 6.91     | 0.07       | 2.29    | 0.47      | 2.04       | 0.97     | 9.16        | 2.73      | 17.85     | 18.71      | 10.88    | 21.64     |
| 40            | 0.01               | 3.41     | 0.03       | 2.89    | 0.70      | 1.24       | 2.80     | 8.48        | 1.09      | 7.36      | 7.94       | 9.70     | 12.53     |
| 50            | 0.01               | 3.91     | 0.04       | 0.36    | 0.40      | 0.79       | 2.28     | 8.32        | 0.59      | 6.61      | 7.21       | 9.10     | 11.61     |
| 60            | 0.01               | 38.33    | 0.09       | 7.79    | 1.08      | 5.83       | 3.46     | 17.00       | 1.82      | 34.76     | 48.79      | 26.41    | 55.48     |
| 90            | 0.50               | 37.34    | 0.15       | 0.35    | 1.44      | 10.36      | 0.99     | 8.27        | 0.50      | 38.41     | 39.81      | 38.25    | 55.21     |
| 100           | 15.69              | 46.05    | 0.13       | 1.20    | 1.36      | 9.47       | 1.45     | 8.06        | 3.76      | 33.73     | 40.09      | 42.73    | 58.59     |
| 110           | 60.63              | 75.67    | 0.08       | 1.29    | 0.57      | 6.23       | 1.23     | 8.00        | 6.07      | 20.59     | 41.77      | 67.44    | 79.33     |
| 120           | 141.58             | 36.54    | 0.04       | 2.26    | 0.55      | 2.49       | 1.65     | 8.88        | 6.21      | 8.94      | 28.42      | 27.18    | 39.33     |
| 130           | 307.38             | 60.80    | 0.04       | 3.62    | 0.50      | 3.24       | 1.54     | 9.90        | 5.79      | 8.63      | 36.87      | 50.69    | 62.68     |
| 140           | 566.15             | 58.60    | 0.04       | 3.37    | 0.39      | 2.80       | 1.39     | 10.40       | 4.88      | 7.62      | 38.02      | 46.90    | 60.38     |
| 150           | 750.31             | 49.43    | 0.03       | 2.75    | 0.25      | 1.90       | 1.00     | 10.78       | 3.56      | 5.95      | 39.58      | 32.45    | 51.18     |

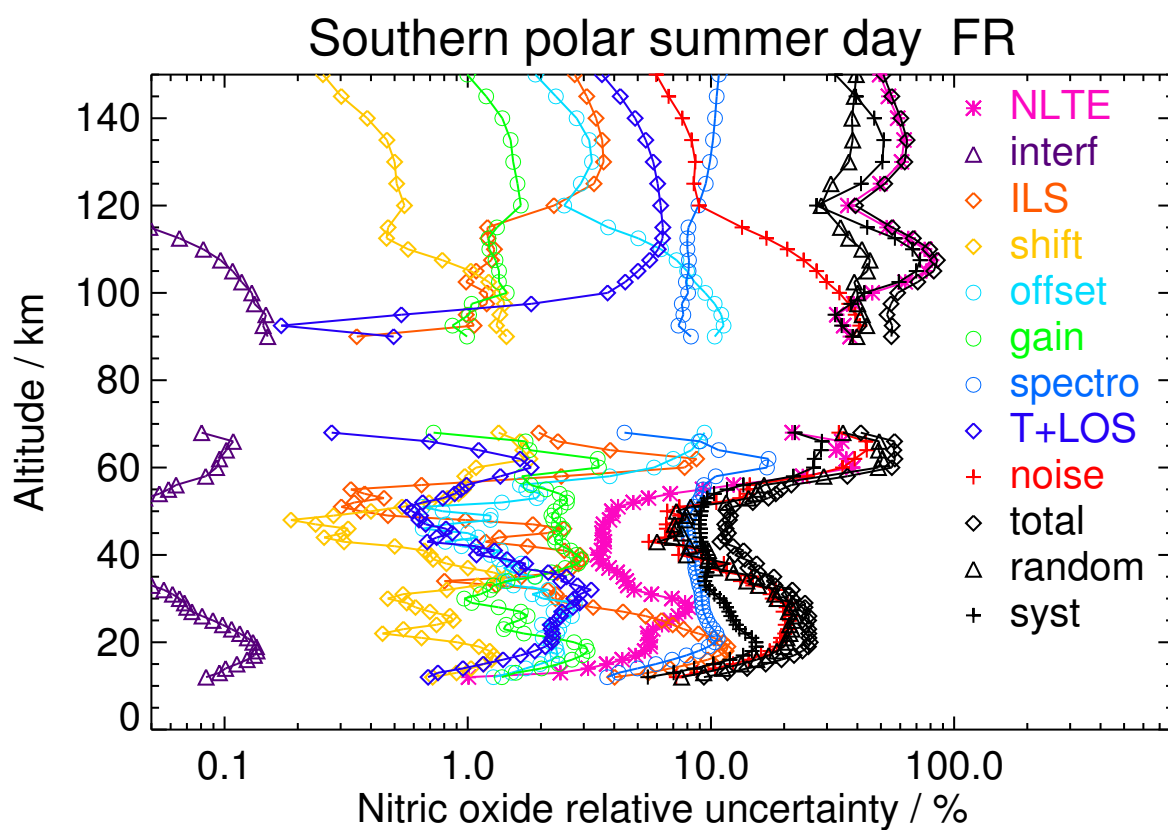

**Figure S31.** V8H\_NO\_61 Southern polar summer day

**Table S33.** Nitric oxide error budget for Southern polar summer night. All uncertainties are  $1\sigma$ .

| altitude (km) | mean target (ppmv) | NLTE (%) | interf (%) | ILS (%) | shift (%) | offset (%) | gain (%) | spectro (%) | T+LOS (%) | noise (%) | random (%) | syst (%) | total (%) |
|---------------|--------------------|----------|------------|---------|-----------|------------|----------|-------------|-----------|-----------|------------|----------|-----------|
| 30            | 0.00               | 23.39    | 0.21       | 3.18    | 1.23      | 5.07       | 2.82     | 8.97        | 1.30      | 32.07     | 40.70      | 6.84     | 41.27     |
| 40            | 0.00               | 19.60    | 0.08       | 0.95    | 0.84      | 2.46       | 3.38     | 7.65        | 1.75      | 17.43     | 27.04      | 6.11     | 27.72     |
| 50            | 0.00               | 9.22     | 0.07       | 0.75    | 0.74      | 1.63       | 3.04     | 11.97       | 0.78      | 14.97     | 19.79      | 8.61     | 21.58     |
| 60            | 0.01               | 48.19    | 0.11       | 2.12    | 0.75      | 8.50       | 2.48     | 12.93       | 1.49      | 51.80     | 65.01      | 32.13    | 72.52     |
| 100           | 11.54              | 61.28    | 0.16       | 1.41    | 1.04      | 10.75      | 2.12     | 10.13       | 4.02      | 35.83     | 54.14      | 48.48    | 72.67     |
| 110           | 50.61              | 71.38    | 0.10       | 1.17    | 0.42      | 7.24       | 1.28     | 9.34        | 9.51      | 23.48     | 52.75      | 55.65    | 76.68     |
| 120           | 140.45             | 35.68    | 0.09       | 1.88    | 0.55      | 2.81       | 2.47     | 10.01       | 7.48      | 10.67     | 29.51      | 26.27    | 39.51     |
| 130           | 260.21             | 54.91    | 0.10       | 2.87    | 0.55      | 2.92       | 3.01     | 12.09       | 5.20      | 8.31      | 40.51      | 40.52    | 57.30     |
| 140           | 379.09             | 44.34    | 0.08       | 2.47    | 0.34      | 2.10       | 2.77     | 12.69       | 3.78      | 6.72      | 33.32      | 33.08    | 46.95     |
| 150           | 428.79             | 42.22    | 0.07       | 1.67    | 0.15      | 1.82       | 2.35     | 12.68       | 2.45      | 6.34      | 31.84      | 31.42    | 44.73     |

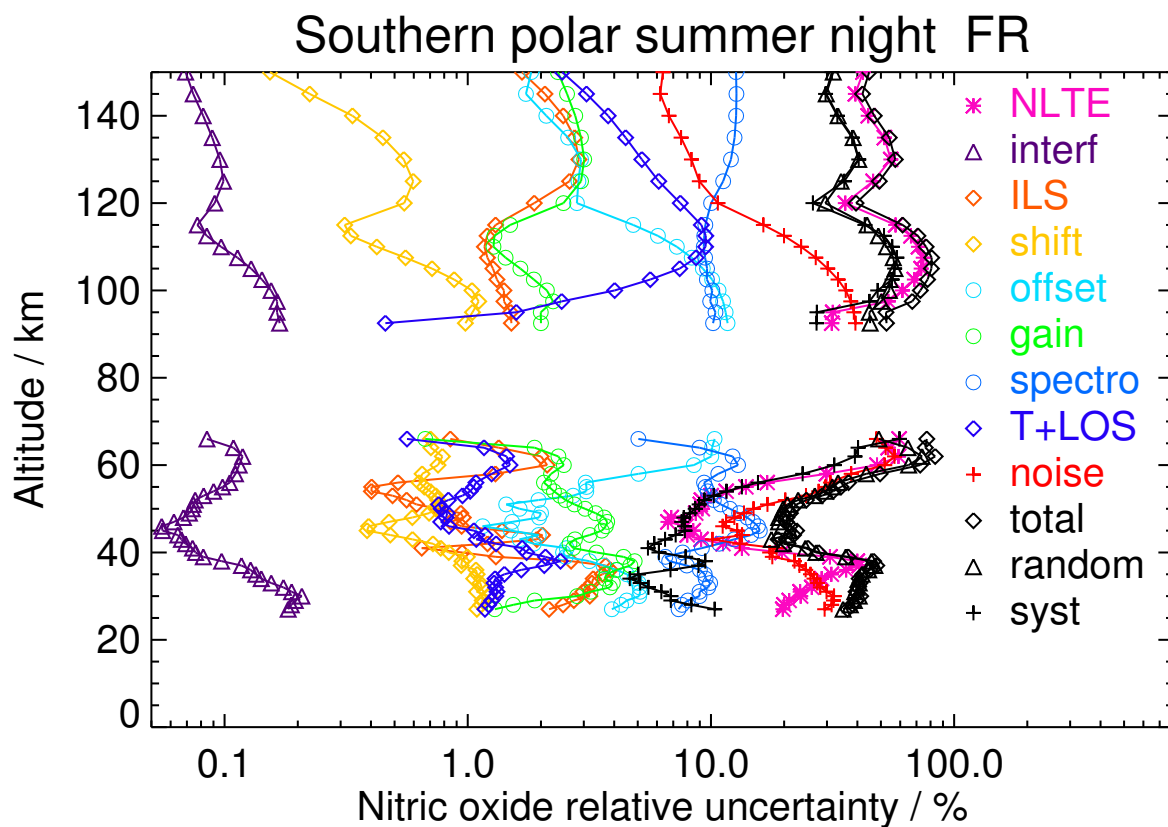

**Figure S32.** V8H\_NO\_61 Southern polar summer night

**Table S34.** Nitric oxide error budget for Southern polar autumn day. All uncertainties are  $1\sigma$ .

| altitude (km) | mean target (ppmv) | NLTE (%) | interf (%) | ILS (%) | shift (%) | offset (%) | gain (%) | spectro (%) | T+LOS (%) | noise (%) | random (%) | syst (%) | total (%) |
|---------------|--------------------|----------|------------|---------|-----------|------------|----------|-------------|-----------|-----------|------------|----------|-----------|
| 20            | 0.00               | 5.02     | 0.16       | 7.91    | 0.35      | 3.96       | 0.42     | 7.62        | 1.50      | 25.40     | 27.14      | 8.53     | 28.45     |
| 30            | 0.01               | 15.06    | 0.13       | 3.90    | 0.71      | 7.40       | 3.09     | 11.54       | 1.62      | 34.91     | 37.55      | 15.84    | 40.76     |
| 40            | 0.01               | 11.07    | 0.09       | 4.01    | 0.61      | 4.48       | 3.76     | 12.02       | 1.68      | 29.56     | 32.17      | 12.61    | 34.56     |
| 50            | 0.01               | 16.46    | 0.07       | 1.22    | 0.90      | 2.68       | 1.61     | 10.34       | 1.50      | 33.22     | 35.87      | 14.46    | 38.67     |
| 60            | 0.01               | 50.66    | 0.07       | 1.19    | 0.54      | 9.59       | 1.54     | 10.07       | 2.18      | 62.81     | 71.93      | 39.25    | 81.94     |
| 70            | 0.06               | 30.24    | 0.19       | 1.02    | 0.37      | 12.75      | 4.30     | 9.38        | 0.40      | 42.55     | 44.44      | 31.94    | 54.73     |
| 80            | 0.27               | 61.37    | 0.08       | 1.20    | 0.42      | 12.42      | 1.71     | 8.94        | 0.87      | 40.94     | 53.37      | 53.24    | 75.38     |
| 90            | 3.75               | 37.64    | 0.08       | 1.87    | 0.58      | 11.12      | 1.69     | 11.77       | 0.45      | 39.24     | 49.16      | 28.44    | 56.80     |
| 100           | 26.87              | 45.82    | 0.07       | 1.62    | 0.49      | 8.88       | 1.62     | 10.84       | 0.09      | 30.87     | 41.95      | 38.66    | 57.04     |
| 110           | 141.41             | 53.28    | 0.05       | 1.50    | 0.34      | 5.18       | 1.75     | 10.01       | 9.40      | 17.91     | 41.75      | 40.46    | 58.14     |
| 120           | 286.20             | 35.68    | 0.03       | 2.17    | 0.17      | 3.48       | 1.02     | 8.43        | 9.09      | 10.88     | 26.36      | 29.47    | 39.54     |
| 130           | 373.61             | 42.16    | 0.02       | 2.38    | 0.09      | 2.90       | 0.69     | 9.48        | 3.79      | 6.84      | 26.82      | 34.99    | 44.08     |
| 140           | 413.66             | 30.24    | 0.02       | 1.78    | 0.08      | 1.68       | 0.69     | 10.16       | 1.84      | 5.57      | 21.66      | 24.28    | 32.54     |
| 150           | 424.29             | 43.82    | 0.02       | 1.12    | 0.12      | 2.67       | 0.69     | 10.62       | 0.97      | 7.77      | 31.22      | 33.59    | 45.86     |

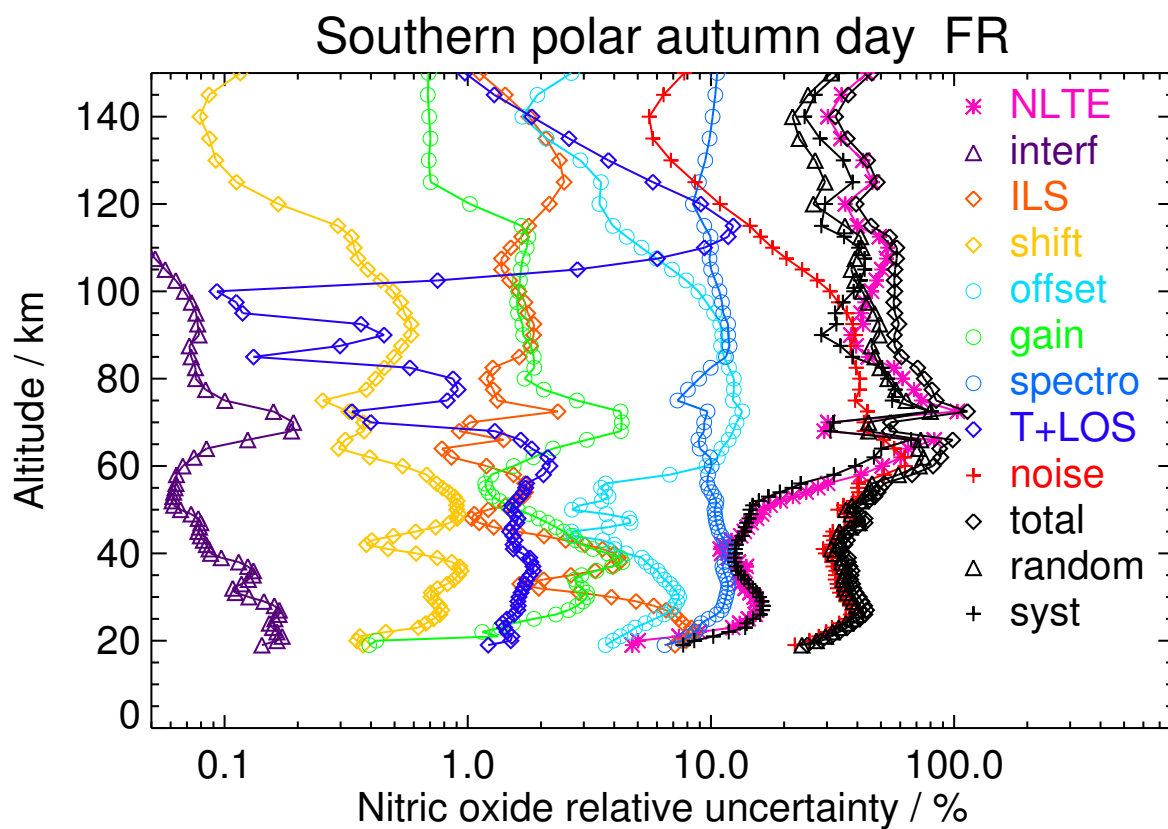

**Figure S33.** V8H\_NO\_61 Southern polar autumn day

**Table S35.** Nitric oxide error budget for Southern polar autumn night. All uncertainties are  $1\sigma$ .

| altitude (km) | mean target (ppmv) | NLTE (%) | interf (%) | ILS (%) | shift (%) | offset (%) | gain (%) | spectro (%) | T+LOS (%) | noise (%) | random (%) | syst (%) | total (%) |
|---------------|--------------------|----------|------------|---------|-----------|------------|----------|-------------|-----------|-----------|------------|----------|-----------|
| 30            | 0.00               | 21.31    | 0.53       | 1.40    | 1.23      | 9.71       | 2.28     | 5.62        | 1.67      | 49.23     | 50.22      | 22.19    | 54.91     |
| 40            | 0.00               | 66.41    | 0.12       | 1.05    | 1.26      | 12.79      | 1.27     | 11.13       | 2.18      | 68.45     | 82.85      | 50.28    | 96.91     |
| 50            | 0.00               | 32.39    | 0.14       | 1.16    | 1.65      | 5.26       | 2.19     | 17.30       | 2.53      | 34.16     | 44.95      | 23.19    | 50.58     |
| 60            | 0.02               | 79.68    | 0.09       | 2.53    | 0.58      | 10.07      | 2.71     | 8.77        | 4.90      | 57.85     | 84.85      | 52.09    | 99.56     |
| 70            | 0.26               | 72.96    | 0.12       | 0.92    | 0.51      | 8.54       | 1.83     | 10.29       | 2.58      | 32.56     | 66.18      | 46.84    | 81.08     |
| 80            | 0.83               | 59.44    | 0.19       | 1.84    | 0.54      | 10.30      | 5.06     | 10.17       | 0.54      | 33.94     | 66.71      | 21.79    | 70.18     |
| 90            | 14.47              | 54.53    | 0.26       | 1.08    | 0.64      | 7.41       | 5.25     | 9.76        | 1.28      | 22.89     | 54.92      | 25.73    | 60.65     |
| 100           | 55.81              | 35.38    | 0.18       | 0.74    | 0.34      | 7.06       | 4.69     | 9.08        | 0.51      | 21.27     | 37.86      | 20.65    | 43.12     |
| 110           | 179.64             | 73.05    | 0.08       | 1.00    | 0.44      | 5.96       | 2.70     | 11.04       | 10.76     | 18.40     | 62.51      | 45.26    | 77.17     |
| 120           | 411.99             | 50.57    | 0.08       | 3.00    | 0.31      | 3.12       | 2.46     | 12.07       | 10.12     | 9.33      | 43.51      | 32.00    | 54.01     |
| 130           | 554.89             | 53.31    | 0.06       | 2.55    | 0.18      | 2.50       | 1.64     | 10.61       | 3.21      | 5.85      | 40.12      | 37.49    | 54.91     |
| 140           | 532.90             | 32.46    | 0.07       | 1.38    | 0.23      | 1.67       | 2.01     | 10.64       | 1.49      | 5.31      | 24.80      | 24.31    | 34.73     |
| 150           | 485.70             | 61.16    | 0.06       | 0.81    | 0.21      | 3.01       | 1.91     | 10.51       | 1.11      | 7.69      | 45.08      | 43.50    | 62.65     |

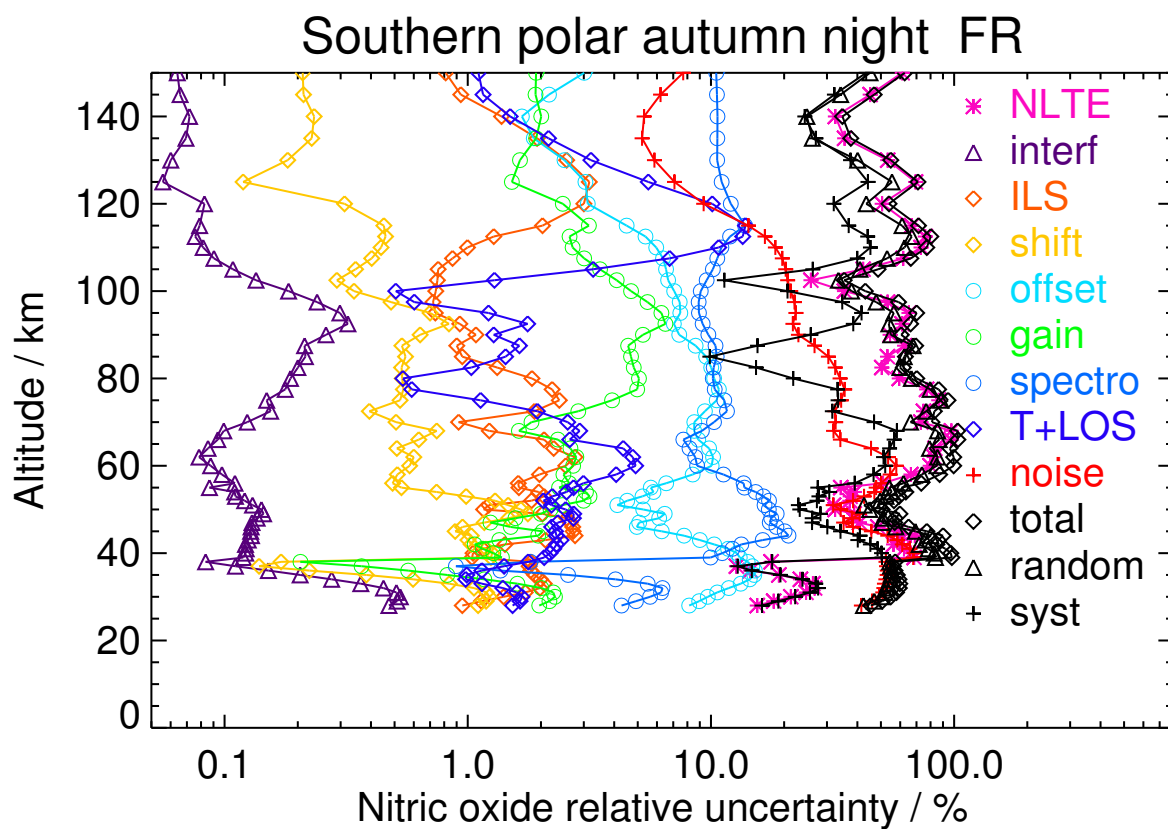

**Figure S34.** V8H\_NO\_61 Southern polar autumn night

**Table S36.** Nitric oxide error budget for Northern polar winter day. All uncertainties are  $1\sigma$ .

| altitude (km) | mean target (ppmv) | NLTE (%) | interf (%) | ILS (%) | shift (%) | offset (%) | gain (%) | spectro (%) | T+LOS (%) | noise (%) | random (%) | syst (%) | total (%) |
|---------------|--------------------|----------|------------|---------|-----------|------------|----------|-------------|-----------|-----------|------------|----------|-----------|
| 30            | 0.00               | 4.84     | 0.16       | 1.14    | 0.38      | 0.76       | 2.11     | 12.19       | 0.89      | 26.54     | 27.28      | 11.83    | 29.73     |
| 40            | 0.01               | 8.20     | 0.28       | 1.59    | 0.33      | 0.99       | 2.06     | 10.86       | 1.07      | 33.96     | 34.39      | 12.84    | 36.71     |
| 50            | 0.01               | 7.43     | 0.91       | 1.84    | 0.46      | 1.28       | 0.81     | 10.60       | 1.58      | 55.95     | 56.39      | 11.28    | 57.51     |
| 60            | 0.01               | 10.04    | 1.89       | 1.12    | 1.21      | 2.38       | 2.46     | 10.88       | 1.71      | 64.62     | 65.56      | 10.88    | 66.45     |
| 70            | 0.06               | 7.80     | 2.10       | 1.73    | 1.24      | 2.13       | 1.70     | 10.21       | 0.11      | 41.73     | 42.69      | 10.00    | 43.85     |
| 80            | 0.34               | 6.32     | 1.59       | 2.18    | 0.83      | 1.97       | 2.55     | 10.29       | 0.33      | 34.01     | 35.02      | 9.74     | 36.35     |
| 90            | 1.80               | 6.95     | 1.23       | 1.82    | 0.71      | 1.53       | 2.84     | 8.80        | 0.19      | 26.61     | 26.70      | 11.71    | 29.15     |
| 120           | 30.64              | 20.83    | 1.29       | 1.47    | 1.03      | 1.73       | 2.77     | 11.22       | 4.57      | 23.01     | 28.90      | 17.03    | 33.55     |
| 130           | 46.23              | 21.84    | 1.60       | 1.20    | 1.19      | 1.85       | 3.67     | 10.79       | 4.27      | 25.11     | 31.08      | 17.29    | 35.56     |
| 140           | 66.13              | 20.55    | 1.74       | 1.02    | 1.17      | 1.80       | 3.80     | 9.83        | 3.86      | 25.84     | 30.79      | 16.64    | 35.00     |
| 150           | 87.18              | 18.69    | 1.78       | 0.87    | 1.10      | 1.72       | 3.70     | 8.74        | 3.39      | 25.49     | 29.43      | 15.59    | 33.30     |

**S2 NO error contribution profile plots and tabulated values for RR NOM data (V8R\_NO\_261)**

40

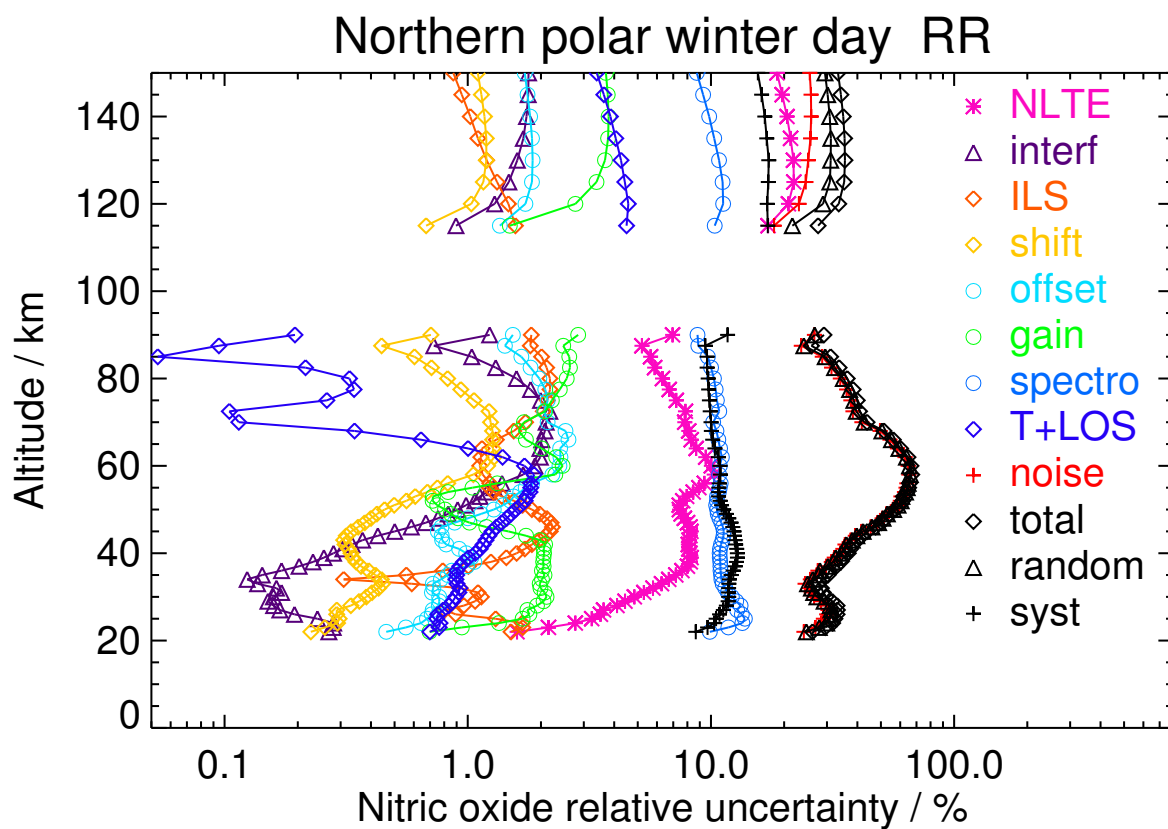

**Figure S35.** V8R\_NO\_261 Northern polar winter day

**Table S37.** Nitric oxide error budget for Northern polar winter night. All uncertainties are  $1\sigma$ .

| altitude (km) | mean target (ppmv) | NLTE (%) | interf (%) | ILS (%) | shift (%) | offset (%) | gain (%) | spectro (%) | T+LOS (%) | noise (%) | random (%) | syst (%) | total (%) |
|---------------|--------------------|----------|------------|---------|-----------|------------|----------|-------------|-----------|-----------|------------|----------|-----------|
| 30            | 0.00               | 0.40     | 0.61       | 2.66    | 0.14      | 0.88       | 4.30     | 1.39        | 0.94      | 32.76     | 32.81      | 5.16     | 33.21     |
| 40            | 0.00               | 2.22     | 0.27       | 1.15    | 0.32      | 1.26       | 5.60     | 4.75        | 0.55      | 32.65     | 33.37      | 3.85     | 33.59     |
| 50            | 0.00               | 11.68    | 3.32       | 3.02    | 1.75      | 2.54       | 8.64     | 11.29       | 1.74      | 72.41     | 74.20      | 10.46    | 74.93     |
| 60            | 0.01               | 11.49    | 2.48       | 0.70    | 1.52      | 2.64       | 1.85     | 18.09       | 2.48      | 62.19     | 64.59      | 13.44    | 65.98     |
| 70            | 0.04               | 8.36     | 3.51       | 1.90    | 2.25      | 3.05       | 3.83     | 13.03       | 1.70      | 66.77     | 67.49      | 13.78    | 68.89     |
| 80            | 0.18               | 11.01    | 5.13       | 1.88    | 3.61      | 2.98       | 6.77     | 17.33       | 0.23      | 62.47     | 64.09      | 17.72    | 66.49     |
| 90            | 1.37               | 12.62    | 4.39       | 2.18    | 3.37      | 2.52       | 9.07     | 15.97       | 1.71      | 48.72     | 49.93      | 20.53    | 53.98     |
| 100           | 15.87              | 20.23    | 3.88       | 2.97    | 3.03      | 2.30       | 8.52     | 15.04       | 3.12      | 44.45     | 47.15      | 22.56    | 52.27     |
| 110           | 31.95              | 24.30    | 3.52       | 2.58    | 1.89      | 1.07       | 5.62     | 16.77       | 7.71      | 21.59     | 33.93      | 17.37    | 38.11     |
| 120           | 43.99              | 31.19    | 0.94       | 1.96    | 0.80      | 0.69       | 1.53     | 16.60       | 8.24      | 12.97     | 33.91      | 18.50    | 38.63     |
| 130           | 53.77              | 33.36    | 2.46       | 2.01    | 1.47      | 0.91       | 2.58     | 15.99       | 6.68      | 15.93     | 36.43      | 18.97    | 41.07     |
| 140           | 64.69              | 31.92    | 2.99       | 2.08    | 1.49      | 0.97       | 3.00     | 14.85       | 5.75      | 17.33     | 35.56      | 18.26    | 39.98     |
| 150           | 82.01              | 27.73    | 2.91       | 1.91    | 1.31      | 0.96       | 2.97     | 12.71       | 4.92      | 17.21     | 31.41      | 16.97    | 35.70     |

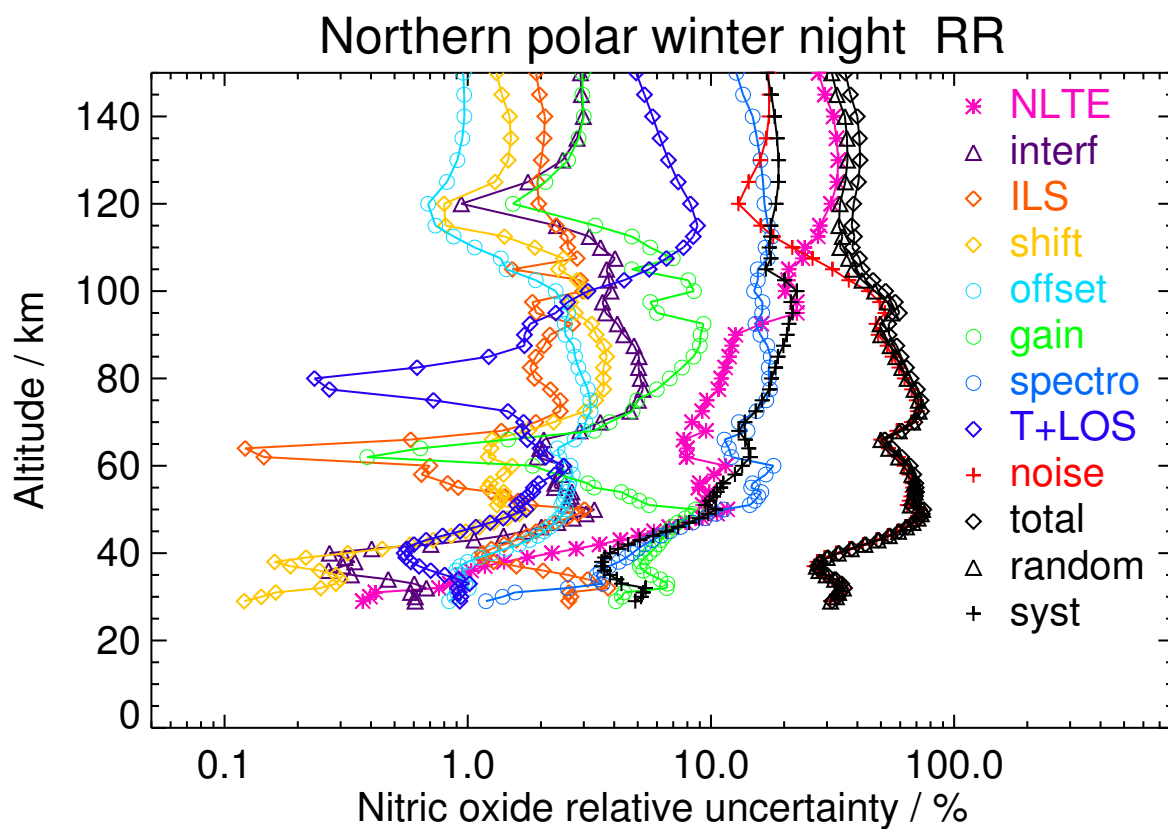

**Figure S36.** V8R\_NO\_261 Northern polar winter night



**Table S38.** Nitric oxide error budget for Northern polar spring day. All uncertainties are  $1\sigma$ .

| altitude (km) | mean target (ppmv) | NLTE (%) | interf (%) | ILS (%) | shift (%) | offset (%) | gain (%) | spectro (%) | T+LOS (%) | noise (%) | random (%) | syst (%) | total (%) |
|---------------|--------------------|----------|------------|---------|-----------|------------|----------|-------------|-----------|-----------|------------|----------|-----------|
| 20            | 0.00               | 4.02     | 0.26       | 0.78    | 0.33      | 0.53       | 0.58     | 8.70        | 1.05      | 24.30     | 24.62      | 8.88     | 26.17     |
| 30            | 0.01               | 9.17     | 0.42       | 1.34    | 1.21      | 1.74       | 1.34     | 10.99       | 1.29      | 36.64     | 37.21      | 13.15    | 39.47     |
| 40            | 0.01               | 6.56     | 0.16       | 2.47    | 0.52      | 0.88       | 2.23     | 11.46       | 1.20      | 28.07     | 28.99      | 11.64    | 31.24     |
| 50            | 0.01               | 2.11     | 0.07       | 2.71    | 0.26      | 0.38       | 2.65     | 12.79       | 1.61      | 20.45     | 21.79      | 11.34    | 24.56     |
| 60            | 0.00               | 16.48    | 0.59       | 2.01    | 0.58      | 2.20       | 1.03     | 10.75       | 3.40      | 63.21     | 64.54      | 15.47    | 66.37     |
| 70            | 0.01               | 9.49     | 0.92       | 2.31    | 1.12      | 2.73       | 1.35     | 8.88        | 0.36      | 53.82     | 53.91      | 13.26    | 55.52     |
| 80            | 0.09               | 19.73    | 0.66       | 2.28    | 1.04      | 2.95       | 2.10     | 6.50        | 1.61      | 53.08     | 53.40      | 20.47    | 57.19     |
| 90            | 1.05               | 25.46    | 0.64       | 2.14    | 1.06      | 2.55       | 2.04     | 8.26        | 0.68      | 49.65     | 51.23      | 23.97    | 56.56     |
| 100           | 6.92               | 39.18    | 0.81       | 1.85    | 1.03      | 2.24       | 1.79     | 7.62        | 0.29      | 44.21     | 49.10      | 33.92    | 59.67     |
| 110           | 51.01              | 32.57    | 0.77       | 1.78    | 0.56      | 1.55       | 1.47     | 8.50        | 10.03     | 31.35     | 38.86      | 26.74    | 47.17     |
| 120           | 125.17             | 27.79    | 0.46       | 1.98    | 0.18      | 0.93       | 0.99     | 10.58       | 8.75      | 13.78     | 25.17      | 22.87    | 34.01     |
| 130           | 227.57             | 28.85    | 0.11       | 2.14    | 0.27      | 0.68       | 0.99     | 11.79       | 5.16      | 7.38      | 21.62      | 24.32    | 32.54     |
| 140           | 340.98             | 30.73    | 0.27       | 2.21    | 0.23      | 0.59       | 1.15     | 12.03       | 3.50      | 8.57      | 23.19      | 25.38    | 34.38     |
| 150           | 425.91             | 32.37    | 0.41       | 2.16    | 0.19      | 0.72       | 1.27     | 11.58       | 2.39      | 11.08     | 25.38      | 25.95    | 36.30     |

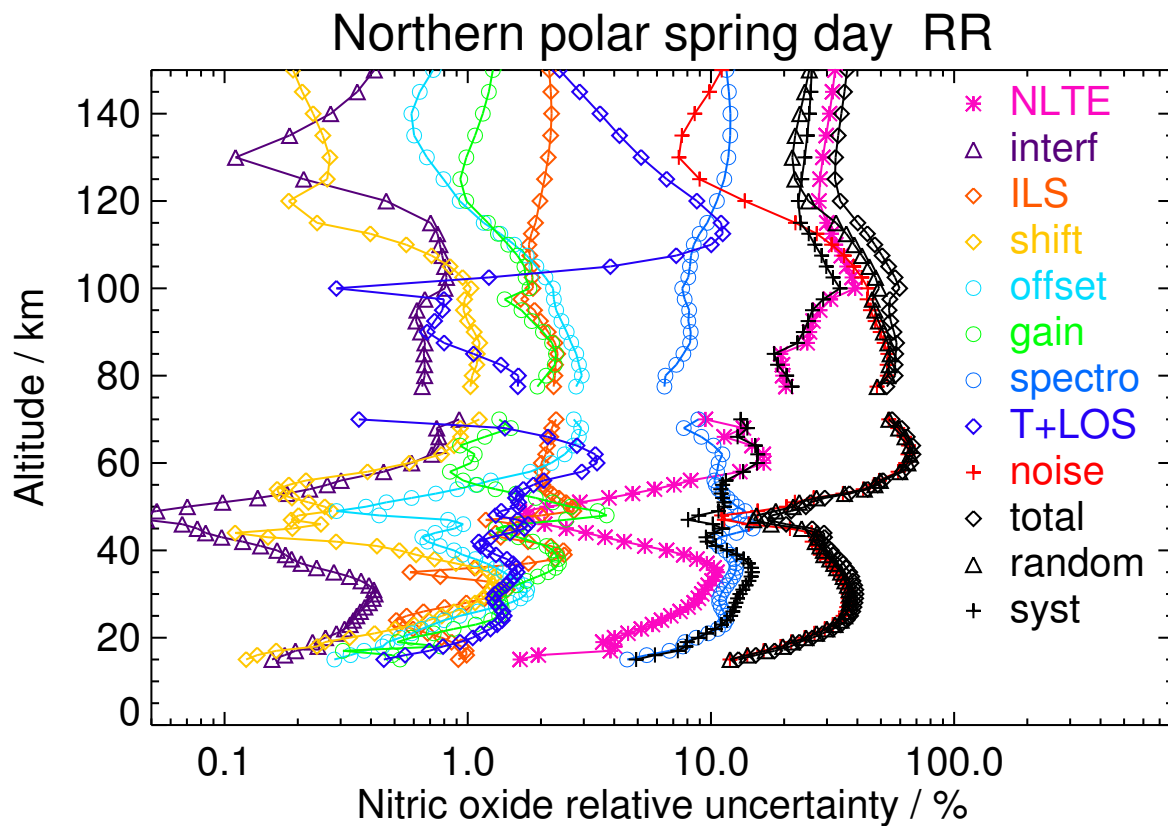

**Figure S37.** V8R\_NO\_261 Northern polar spring day

**Table S39.** Nitric oxide error budget for Northern polar spring night. All uncertainties are  $1\sigma$ .

| altitude (km) | mean target (ppmv) | NLTE (%) | interf (%) | ILS (%) | shift (%) | offset (%) | gain (%) | spectro (%) | T+LOS (%) | noise (%) | random (%) | syst (%) | total (%) |
|---------------|--------------------|----------|------------|---------|-----------|------------|----------|-------------|-----------|-----------|------------|----------|-----------|
| 30            | 0.00               | 2.47     | 0.50       | 0.42    | 0.63      | 1.23       | 6.24     | 6.48        | 1.25      | 41.08     | 41.52      | 7.39     | 42.17     |
| 40            | 0.00               | 5.05     | 0.22       | 0.71    | 0.50      | 1.01       | 0.97     | 8.70        | 0.71      | 33.30     | 34.54      | 4.54     | 34.84     |
| 50            | 0.01               | 3.13     | 0.10       | 1.65    | 0.16      | 0.70       | 3.75     | 16.71       | 1.03      | 20.63     | 25.72      | 8.46     | 27.07     |
| 60            | 0.00               | 9.31     | 0.64       | 1.77    | 0.55      | 2.15       | 1.33     | 10.53       | 2.60      | 71.20     | 71.81      | 11.29    | 72.69     |
| 90            | 0.66               | 18.85    | 0.66       | 0.12    | 1.24      | 2.82       | 1.67     | 12.48       | 0.19      | 42.15     | 42.26      | 22.67    | 47.96     |
| 100           | 7.04               | 23.79    | 0.85       | 1.98    | 1.09      | 2.22       | 2.07     | 13.96       | 1.28      | 42.04     | 44.43      | 23.89    | 50.44     |
| 110           | 36.79              | 24.03    | 0.82       | 2.02    | 0.67      | 1.25       | 1.55     | 14.04       | 9.61      | 27.47     | 36.03      | 18.23    | 40.38     |
| 120           | 74.87              | 24.92    | 0.38       | 1.94    | 0.17      | 0.88       | 0.90     | 12.42       | 8.81      | 14.98     | 26.86      | 19.00    | 32.90     |
| 130           | 91.06              | 25.14    | 0.28       | 1.88    | 0.32      | 0.91       | 0.91     | 11.20       | 6.32      | 13.40     | 24.53      | 19.51    | 31.34     |
| 140           | 112.12             | 24.56    | 0.47       | 1.80    | 0.33      | 0.88       | 1.12     | 10.30       | 5.03      | 14.46     | 24.19      | 19.08    | 30.81     |
| 150           | 128.22             | 23.16    | 0.59       | 1.67    | 0.30      | 0.90       | 1.24     | 9.22        | 4.01      | 15.20     | 23.44      | 18.00    | 29.56     |

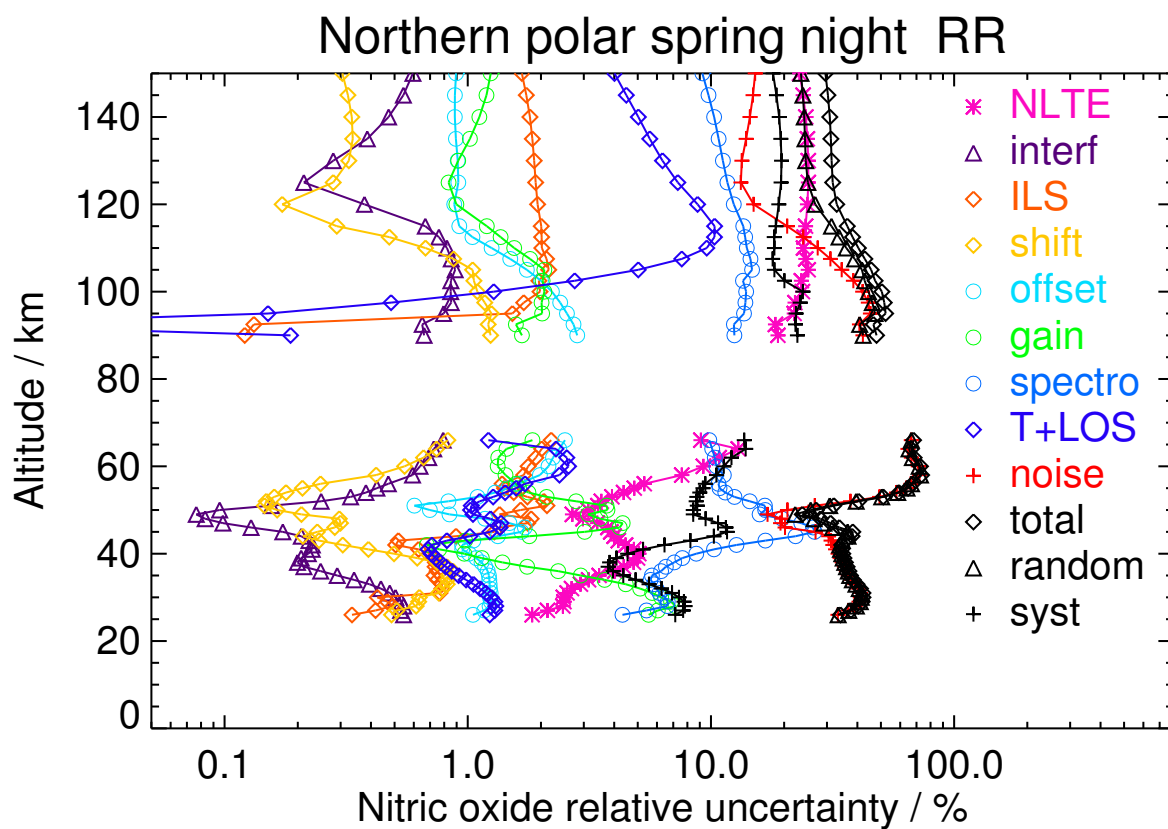

**Figure S38.** V8R\_NO\_261 Northern polar spring night

**Table S40.** Nitric oxide error budget for Northern polar summer day. All uncertainties are  $1\sigma$ .

| altitude (km) | mean target (ppmv) | NLTE (%) | interf (%) | ILS (%) | shift (%) | offset (%) | gain (%) | spectro (%) | T+LOS (%) | noise (%) | random (%) | syst (%) | total (%) |
|---------------|--------------------|----------|------------|---------|-----------|------------|----------|-------------|-----------|-----------|------------|----------|-----------|
| 20            | 0.00               | 1.33     | 0.20       | 1.42    | 0.20      | 0.34       | 0.82     | 10.00       | 1.27      | 17.62     | 17.89      | 9.84     | 20.42     |
| 30            | 0.01               | 4.48     | 0.18       | 2.14    | 0.42      | 0.65       | 1.45     | 9.32        | 1.38      | 17.53     | 17.83      | 10.28    | 20.58     |
| 40            | 0.01               | 2.34     | 0.12       | 0.99    | 0.28      | 0.40       | 1.93     | 8.66        | 0.80      | 13.58     | 13.72      | 9.06     | 16.44     |
| 50            | 0.01               | 1.13     | 0.10       | 1.19    | 0.07      | 0.15       | 1.68     | 8.23        | 0.52      | 20.87     | 21.03      | 8.20     | 22.57     |
| 60            | 0.00               | 5.40     | 0.75       | 1.26    | 1.00      | 1.88       | 1.72     | 8.82        | 1.13      | 57.75     | 57.95      | 9.68     | 58.76     |
| 100           | 11.73              | 15.17    | 1.56       | 2.19    | 2.00      | 1.90       | 3.98     | 9.94        | 2.72      | 36.16     | 37.73      | 15.85    | 40.92     |
| 110           | 46.28              | 17.47    | 1.43       | 1.92    | 0.86      | 1.33       | 2.71     | 10.15       | 9.76      | 25.19     | 28.83      | 17.95    | 33.96     |
| 120           | 92.29              | 20.59    | 0.35       | 1.58    | 0.42      | 0.76       | 1.00     | 10.51       | 8.35      | 10.25     | 18.04      | 19.71    | 26.71     |
| 130           | 155.85             | 22.67    | 0.65       | 1.45    | 0.78      | 0.88       | 2.39     | 10.43       | 6.84      | 11.48     | 19.27      | 20.97    | 28.47     |
| 140           | 245.66             | 23.38    | 1.02       | 1.40    | 0.85      | 1.00       | 3.03     | 10.17       | 5.89      | 14.57     | 21.46      | 21.22    | 30.18     |
| 150           | 311.75             | 22.99    | 1.21       | 1.33    | 0.82      | 1.08       | 3.31     | 9.57        | 4.98      | 16.46     | 22.49      | 20.64    | 30.53     |

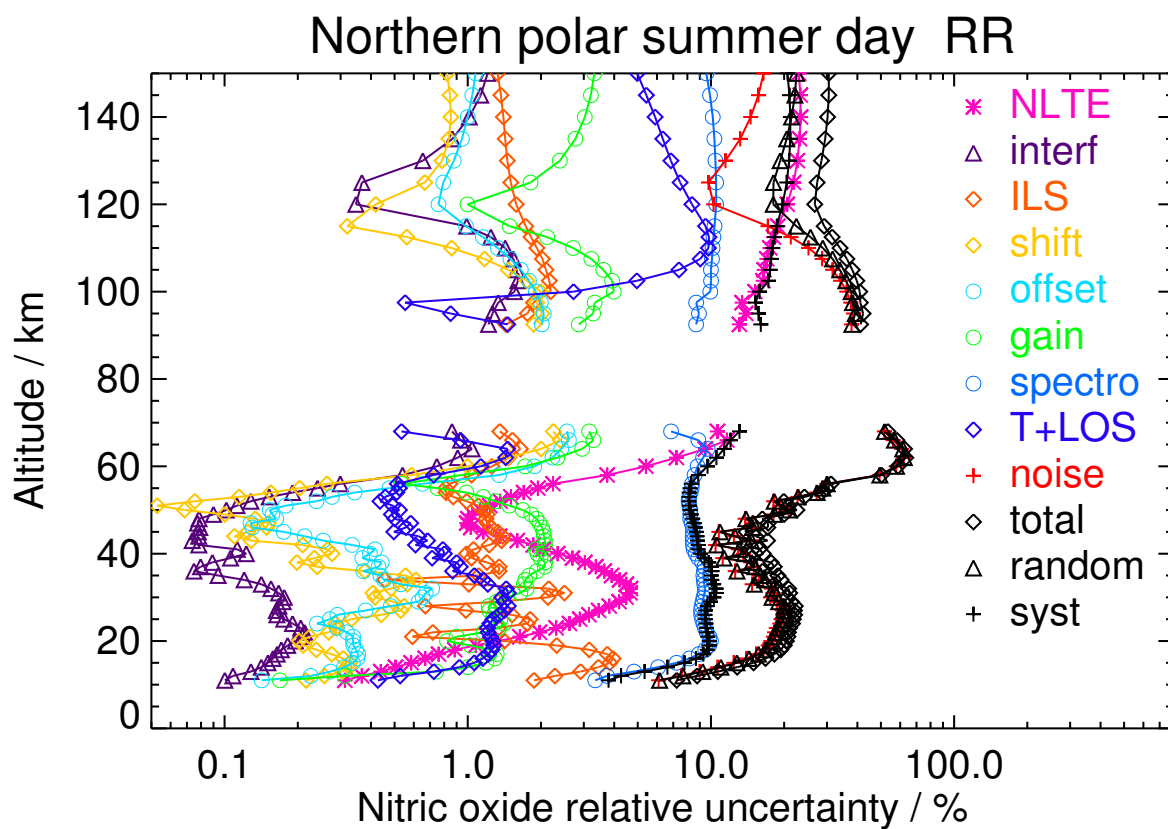

**Figure S39.** V8R\_NO\_261 Northern polar summer day

**Table S41.** Nitric oxide error budget for Northern polar summer night. All uncertainties are  $1\sigma$ .

| altitude (km) | mean target (ppmv) | NLTE (%) | interf (%) | ILS (%) | shift (%) | offset (%) | gain (%) | spectro (%) | T+LOS (%) | noise (%) | random (%) | syst (%) | total (%) |
|---------------|--------------------|----------|------------|---------|-----------|------------|----------|-------------|-----------|-----------|------------|----------|-----------|
| 30            | 0.00               | 1.42     | 0.21       | 0.95    | 0.20      | 0.58       | 2.98     | 1.40        | 0.99      | 27.85     | 27.98      | 2.76     | 28.12     |
| 40            | 0.00               | 1.86     | 0.20       | 0.32    | 0.26      | 0.62       | 1.93     | 2.14        | 0.51      | 25.16     | 25.37      | 1.42     | 25.41     |
| 50            | 0.00               | 1.95     | 0.23       | 1.36    | 0.13      | 0.54       | 1.98     | 12.83       | 0.66      | 29.16     | 30.82      | 8.68     | 32.02     |
| 60            | 0.01               | 14.69    | 0.56       | 1.26    | 0.98      | 1.80       | 3.07     | 10.49       | 1.78      | 52.22     | 54.79      | 8.32     | 55.42     |
| 90            | 0.66               | 29.30    | 0.71       | 1.73    | 1.74      | 2.48       | 1.82     | 11.60       | 1.01      | 38.07     | 43.13      | 24.48    | 49.59     |
| 100           | 6.15               | 17.48    | 1.23       | 2.22    | 1.42      | 1.83       | 2.71     | 12.13       | 3.25      | 33.84     | 37.32      | 15.31    | 40.34     |
| 110           | 32.31              | 18.58    | 1.10       | 1.84    | 0.60      | 1.07       | 1.47     | 12.65       | 12.15     | 21.90     | 30.24      | 15.04    | 33.77     |
| 120           | 78.99              | 22.86    | 0.71       | 1.79    | 0.24      | 0.80       | 0.83     | 11.54       | 9.10      | 11.95     | 24.91      | 16.31    | 29.78     |
| 130           | 94.72              | 27.20    | 0.40       | 2.26    | 0.38      | 0.85       | 1.04     | 12.21       | 6.57      | 12.99     | 27.46      | 18.82    | 33.29     |
| 140           | 116.02             | 28.45    | 0.70       | 2.35    | 0.43      | 0.93       | 1.30     | 11.80       | 5.46      | 14.54     | 28.86      | 19.12    | 34.62     |
| 150           | 131.07             | 27.08    | 0.87       | 2.24    | 0.42      | 0.97       | 1.44     | 10.71       | 4.58      | 15.26     | 27.87      | 18.28    | 33.33     |

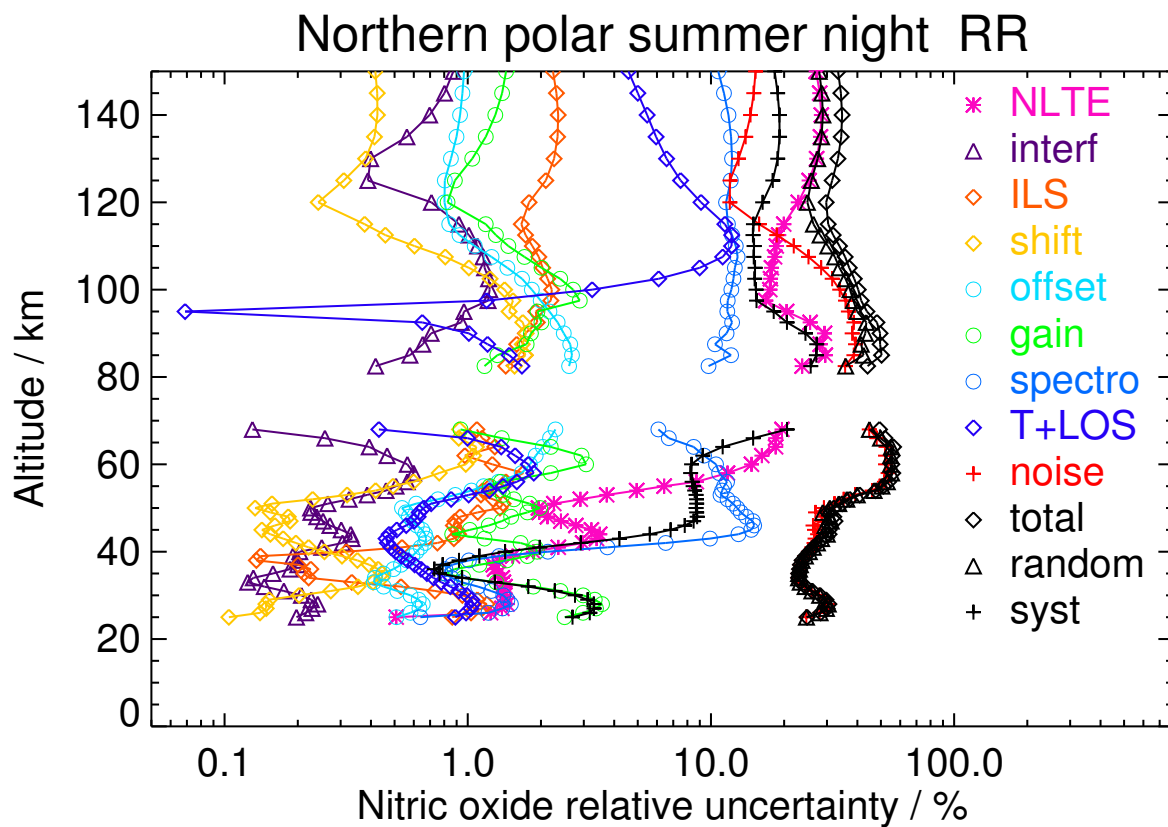

**Figure S40.** V8R\_NO\_261 Northern polar summer night

**Table S42.** Nitric oxide error budget for Northern polar autumn day. All uncertainties are  $1\sigma$ .

| altitude (km) | mean target (ppmv) | NLTE (%) | interf (%) | ILS (%) | shift (%) | offset (%) | gain (%) | spectro (%) | T+LOS (%) | noise (%) | random (%) | syst (%) | total (%) |
|---------------|--------------------|----------|------------|---------|-----------|------------|----------|-------------|-----------|-----------|------------|----------|-----------|
| 20            | 0.00               | 1.40     | 0.19       | 1.34    | 0.13      | 0.56       | 1.32     | 8.84        | 0.87      | 21.90     | 22.73      | 6.92     | 23.76     |
| 30            | 0.00               | 9.56     | 0.16       | 1.02    | 0.35      | 1.10       | 3.26     | 11.67       | 1.22      | 27.00     | 27.59      | 14.49    | 31.16     |
| 40            | 0.00               | 6.90     | 0.18       | 1.81    | 0.30      | 0.88       | 2.62     | 11.88       | 0.93      | 31.36     | 31.97      | 12.71    | 34.41     |
| 50            | 0.00               | 4.42     | 0.30       | 1.70    | 0.08      | 0.92       | 1.82     | 10.85       | 1.50      | 48.29     | 48.78      | 9.98     | 49.79     |
| 60            | 0.01               | 18.12    | 0.99       | 1.30    | 0.54      | 2.27       | 1.61     | 12.85       | 2.88      | 61.72     | 64.35      | 13.47    | 65.74     |
| 70            | 0.04               | 33.66    | 1.50       | 2.06    | 1.01      | 2.83       | 1.22     | 7.85        | 0.23      | 52.09     | 57.95      | 23.81    | 62.65     |
| 80            | 0.18               | 26.33    | 1.38       | 1.83    | 1.23      | 2.77       | 2.12     | 7.25        | 0.99      | 50.20     | 53.59      | 20.34    | 57.32     |
| 90            | 0.52               | 15.27    | 1.24       | 1.51    | 0.67      | 2.43       | 2.05     | 11.73       | 0.38      | 51.65     | 51.73      | 19.42    | 55.26     |
| 100           | 11.40              | 15.33    | 0.77       | 1.21    | 0.58      | 1.76       | 1.18     | 7.51        | 0.41      | 34.70     | 35.34      | 15.92    | 38.76     |
| 110           | 69.70              | 13.37    | 0.73       | 1.34    | 0.21      | 1.11       | 0.74     | 8.05        | 4.89      | 22.66     | 24.10      | 14.29    | 28.02     |
| 120           | 70.60              | 22.33    | 0.42       | 1.91    | 0.32      | 0.97       | 1.00     | 11.94       | 7.79      | 13.28     | 24.26      | 17.21    | 29.74     |
| 130           | 101.44             | 25.73    | 0.25       | 1.91    | 0.41      | 0.93       | 1.36     | 11.98       | 5.82      | 12.52     | 25.17      | 19.21    | 31.66     |
| 140           | 133.82             | 26.44    | 0.43       | 1.86    | 0.39      | 0.89       | 1.47     | 11.52       | 4.68      | 14.05     | 26.05      | 19.47    | 32.52     |
| 150           | 164.68             | 25.68    | 0.55       | 1.72    | 0.35      | 0.92       | 1.48     | 10.57       | 3.77      | 15.32     | 25.92      | 18.84    | 32.04     |

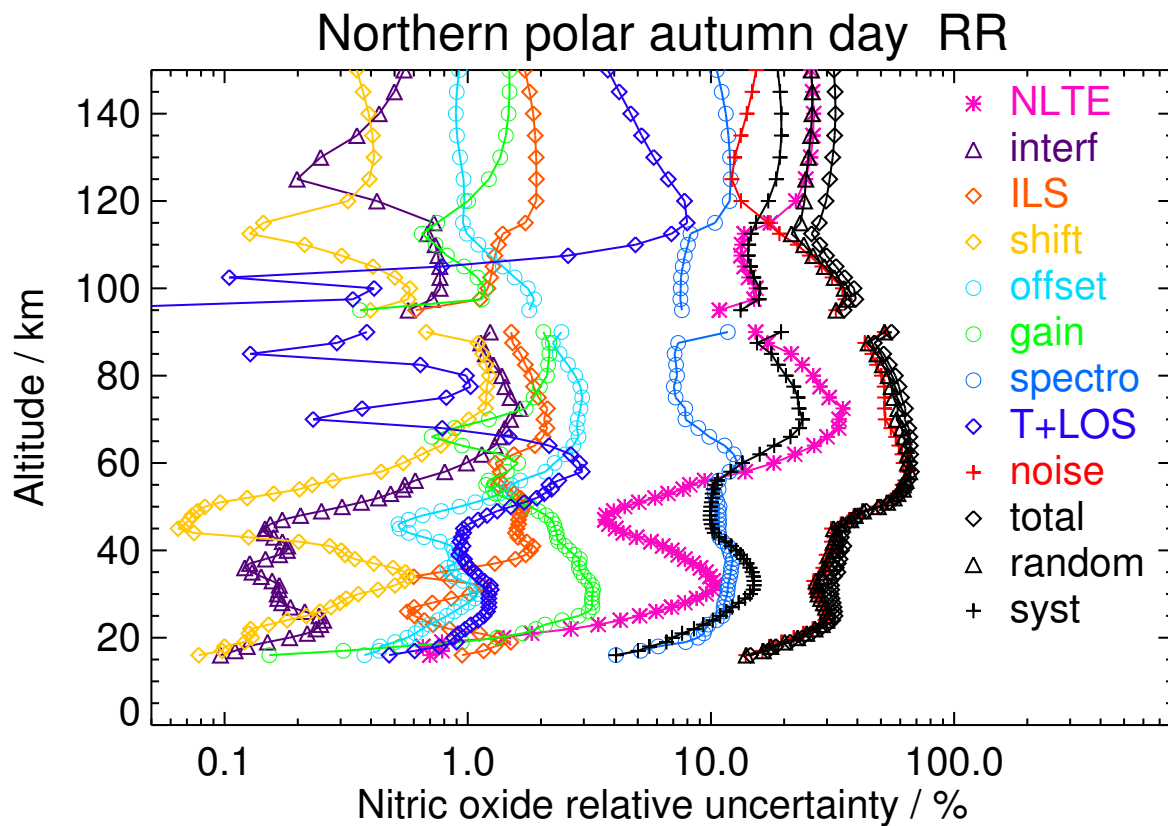

**Figure S41.** V8R\_NO\_261 Northern polar autumn day

**Table S43.** Nitric oxide error budget for Northern polar autumn night. All uncertainties are  $1\sigma$ .

| altitude (km) | mean target (ppmv) | NLTE (%) | interf (%) | ILS (%) | shift (%) | offset (%) | gain (%) | spectro (%) | T+LOS (%) | noise (%) | random (%) | syst (%) | total (%) |
|---------------|--------------------|----------|------------|---------|-----------|------------|----------|-------------|-----------|-----------|------------|----------|-----------|
| 50            | 0.00               | 3.81     | 0.51       | 0.98    | 0.43      | 1.10       | 0.45     | 10.52       | 3.06      | 63.04     | 63.51      | 8.87     | 64.12     |
| 60            | 0.01               | 7.18     | 0.46       | 0.47    | 0.63      | 1.86       | 2.59     | 11.22       | 3.85      | 51.60     | 52.94      | 7.99     | 53.54     |
| 80            | 0.14               | 23.88    | 0.81       | 0.47    | 0.79      | 2.45       | 0.62     | 7.94        | 0.46      | 43.49     | 46.51      | 19.22    | 50.32     |
| 90            | 0.42               | 13.48    | 0.60       | 1.51    | 0.26      | 1.62       | 0.57     | 13.90       | 1.77      | 38.43     | 38.52      | 19.43    | 43.14     |
| 100           | 24.18              | 15.57    | 0.63       | 0.53    | 0.64      | 1.54       | 0.47     | 6.70        | 1.09      | 26.72     | 27.90      | 15.09    | 31.72     |
| 110           | 68.70              | 27.29    | 1.02       | 1.33    | 0.45      | 1.15       | 0.97     | 9.63        | 8.68      | 22.55     | 34.47      | 15.43    | 37.77     |
| 120           | 118.59             | 31.58    | 0.83       | 2.27    | 0.16      | 0.78       | 1.00     | 13.75       | 8.97      | 12.59     | 34.29      | 16.04    | 37.86     |
| 130           | 127.48             | 33.97    | 0.19       | 2.63    | 0.20      | 0.70       | 1.05     | 14.42       | 6.31      | 10.54     | 34.88      | 17.45    | 39.00     |
| 140           | 140.08             | 35.40    | 0.55       | 2.59    | 0.18      | 0.68       | 1.06     | 13.62       | 4.91      | 12.23     | 36.03      | 17.96    | 40.26     |
| 150           | 147.93             | 35.90    | 0.80       | 2.35    | 0.18      | 0.79       | 1.01     | 12.09       | 3.89      | 13.67     | 36.45      | 17.77    | 40.56     |

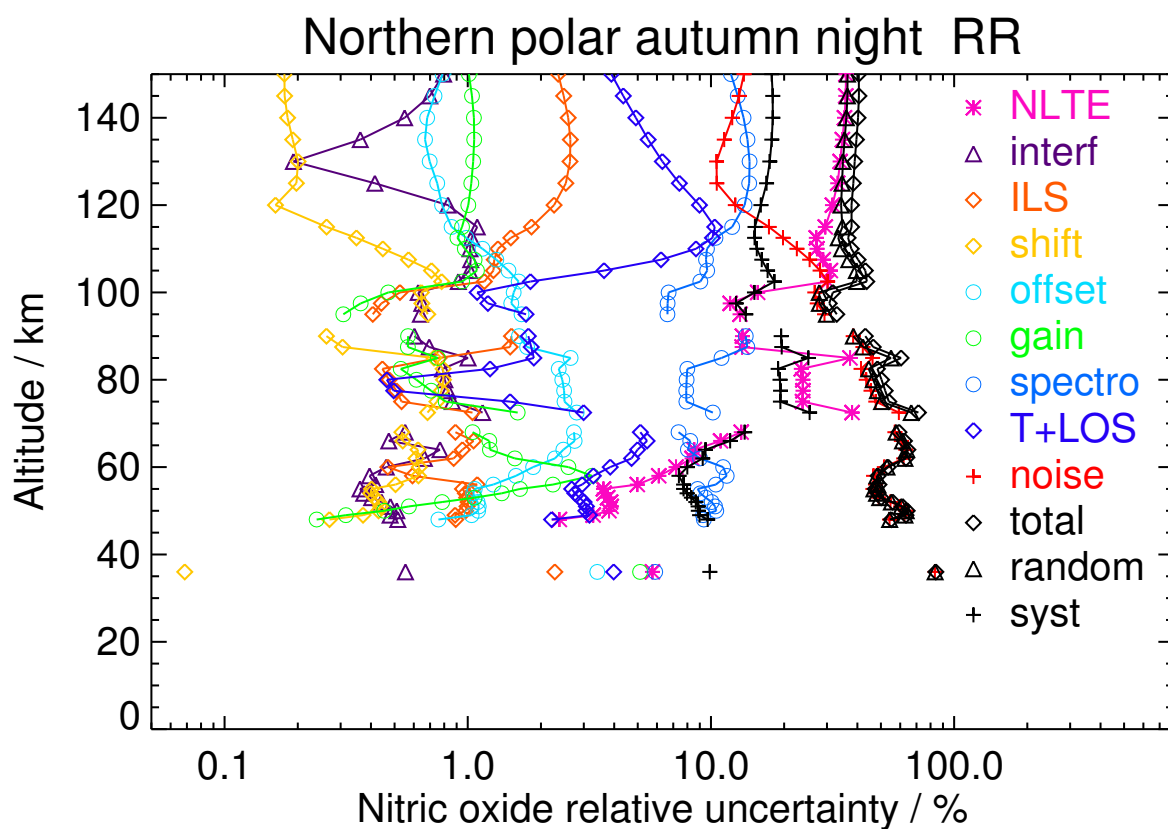

**Figure S42.** V8R\_NO\_261 Northern polar autumn night

**Table S44.** Nitric oxide error budget for Northern midlatitude winter day. All uncertainties are  $1\sigma$ .

| altitude (km) | mean target (ppmv) | NLTE (%) | interf (%) | ILS (%) | shift (%) | offset (%) | gain (%) | spectro (%) | T+LOS (%) | noise (%) | random (%) | syst (%) | total (%) |
|---------------|--------------------|----------|------------|---------|-----------|------------|----------|-------------|-----------|-----------|------------|----------|-----------|
| 20            | 0.00               | 0.93     | 0.20       | 0.66    | 0.23      | 0.51       | 2.29     | 8.33        | 0.91      | 23.25     | 23.57      | 7.88     | 24.86     |
| 30            | 0.00               | 6.93     | 0.11       | 2.43    | 0.44      | 0.85       | 2.15     | 11.64       | 1.26      | 20.35     | 20.94      | 13.12    | 24.71     |
| 40            | 0.01               | 4.82     | 0.12       | 1.26    | 0.19      | 0.60       | 2.20     | 9.89        | 0.74      | 20.00     | 20.31      | 10.77    | 22.99     |
| 50            | 0.01               | 2.31     | 0.25       | 1.26    | 0.14      | 0.64       | 1.32     | 9.32        | 0.85      | 33.24     | 33.49      | 8.98     | 34.67     |
| 60            | 0.00               | 7.06     | 1.21       | 1.77    | 1.10      | 2.45       | 2.08     | 9.54        | 2.49      | 66.29     | 66.77      | 9.97     | 67.51     |
| 70            | 0.01               | 10.22    | 1.55       | 1.93    | 1.48      | 2.86       | 3.30     | 11.08       | 0.24      | 56.08     | 57.08      | 11.89    | 58.30     |
| 80            | 0.08               | 9.71     | 1.47       | 1.81    | 1.44      | 2.99       | 3.43     | 10.89       | 0.60      | 54.86     | 55.66      | 12.34    | 57.02     |
| 90            | 0.68               | 7.14     | 0.94       | 1.29    | 1.00      | 2.17       | 2.18     | 10.03       | 0.33      | 39.34     | 39.85      | 11.15    | 41.38     |
| 120           | 15.26              | 12.64    | 0.45       | 0.67    | 0.51      | 1.27       | 1.72     | 8.57        | 5.94      | 17.62     | 21.08      | 11.85    | 24.18     |
| 130           | 24.60              | 13.29    | 0.68       | 0.54    | 0.77      | 1.55       | 2.59     | 7.62        | 5.35      | 21.40     | 24.07      | 12.34    | 27.05     |
| 140           | 46.99              | 12.56    | 0.80       | 0.46    | 0.83      | 1.61       | 3.00     | 6.84        | 4.82      | 22.86     | 24.74      | 12.30    | 27.63     |
| 150           | 74.13              | 11.77    | 0.84       | 0.41    | 0.83      | 1.58       | 3.20     | 6.25        | 4.22      | 22.76     | 24.28      | 11.75    | 26.97     |

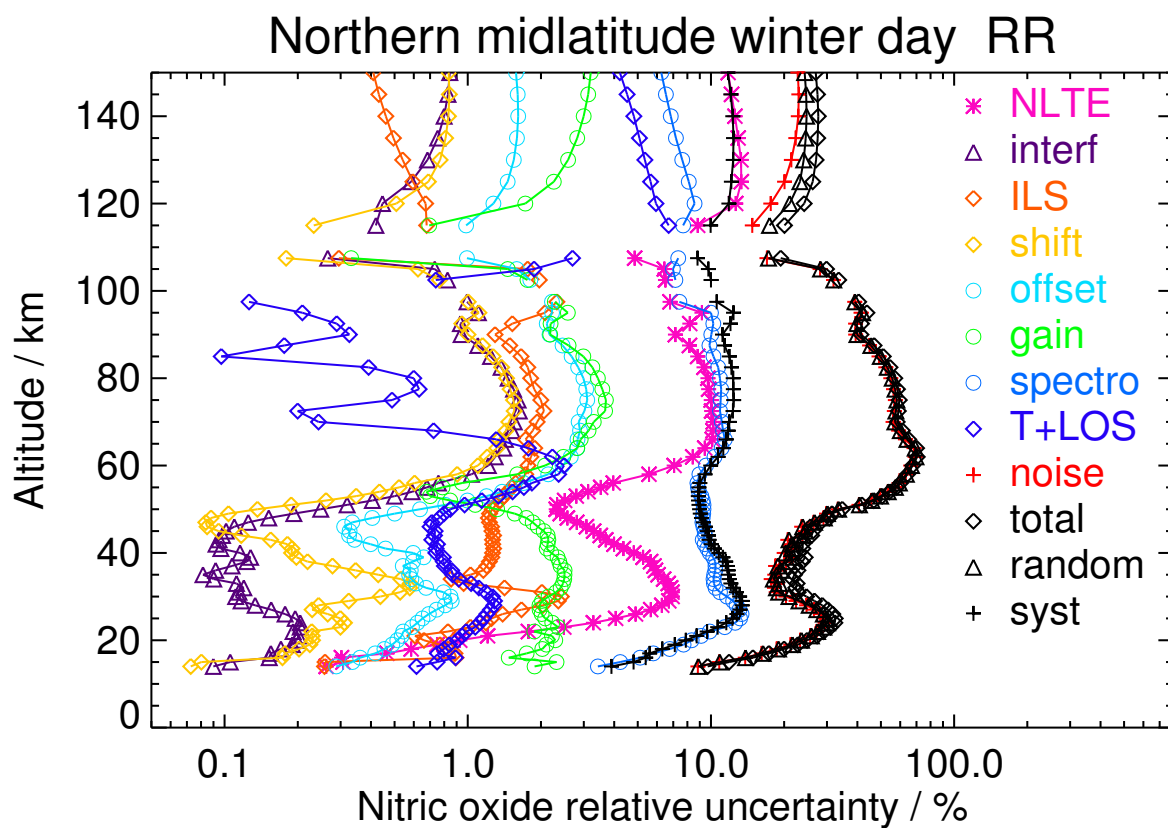

**Figure S43.** V8R\_NO\_261 Northern midlatitude winter day

**Table S45.** Nitric oxide error budget for Northern midlatitude winter night. All uncertainties are  $1\sigma$ .

| altitude (km) | mean target (ppmv) | NLTE (%) | interf (%) | ILS (%) | shift (%) | offset (%) | gain (%) | spectro (%) | T+LOS (%) | noise (%) | random (%) | syst (%) | total (%) |
|---------------|--------------------|----------|------------|---------|-----------|------------|----------|-------------|-----------|-----------|------------|----------|-----------|
| 60            | 0.00               | 5.51     | 1.24       | 0.33    | 1.33      | 1.83       | 3.38     | 11.37       | 5.56      | 79.02     | 79.26      | 13.06    | 80.33     |
| 70            | 0.01               | 4.82     | 0.85       | 0.83    | 0.92      | 2.11       | 2.11     | 12.87       | 1.02      | 60.35     | 60.80      | 12.10    | 61.99     |
| 80            | 0.06               | 5.50     | 0.96       | 0.97    | 0.96      | 2.00       | 3.24     | 15.44       | 0.43      | 47.96     | 49.32      | 12.39    | 50.85     |
| 90            | 0.66               | 5.62     | 0.77       | 0.64    | 0.68      | 1.48       | 3.81     | 14.47       | 0.82      | 37.28     | 38.52      | 12.89    | 40.62     |
| 100           | 2.45               | 10.60    | 0.58       | 2.33    | 0.51      | 1.35       | 3.70     | 10.26       | 2.93      | 33.77     | 33.94      | 15.37    | 37.26     |
| 110           | 5.86               | 9.76     | 0.50       | 1.91    | 0.36      | 0.95       | 3.84     | 9.26        | 8.32      | 28.40     | 30.95      | 10.88    | 32.81     |
| 120           | 11.45              | 9.41     | 0.56       | 1.77    | 0.58      | 0.90       | 1.97     | 6.91        | 8.11      | 26.72     | 28.70      | 10.03    | 30.40     |
| 130           | 13.28              | 8.56     | 0.73       | 1.55    | 0.68      | 0.96       | 1.39     | 5.89        | 7.35      | 25.22     | 26.92      | 8.94     | 28.36     |
| 140           | 16.81              | 7.90     | 0.74       | 1.41    | 0.65      | 0.93       | 1.22     | 5.31        | 6.66      | 23.51     | 24.96      | 8.36     | 26.32     |
| 150           | 22.08              | 7.38     | 0.71       | 1.29    | 0.59      | 0.88       | 1.08     | 4.86        | 5.78      | 21.57     | 22.68      | 8.17     | 24.11     |

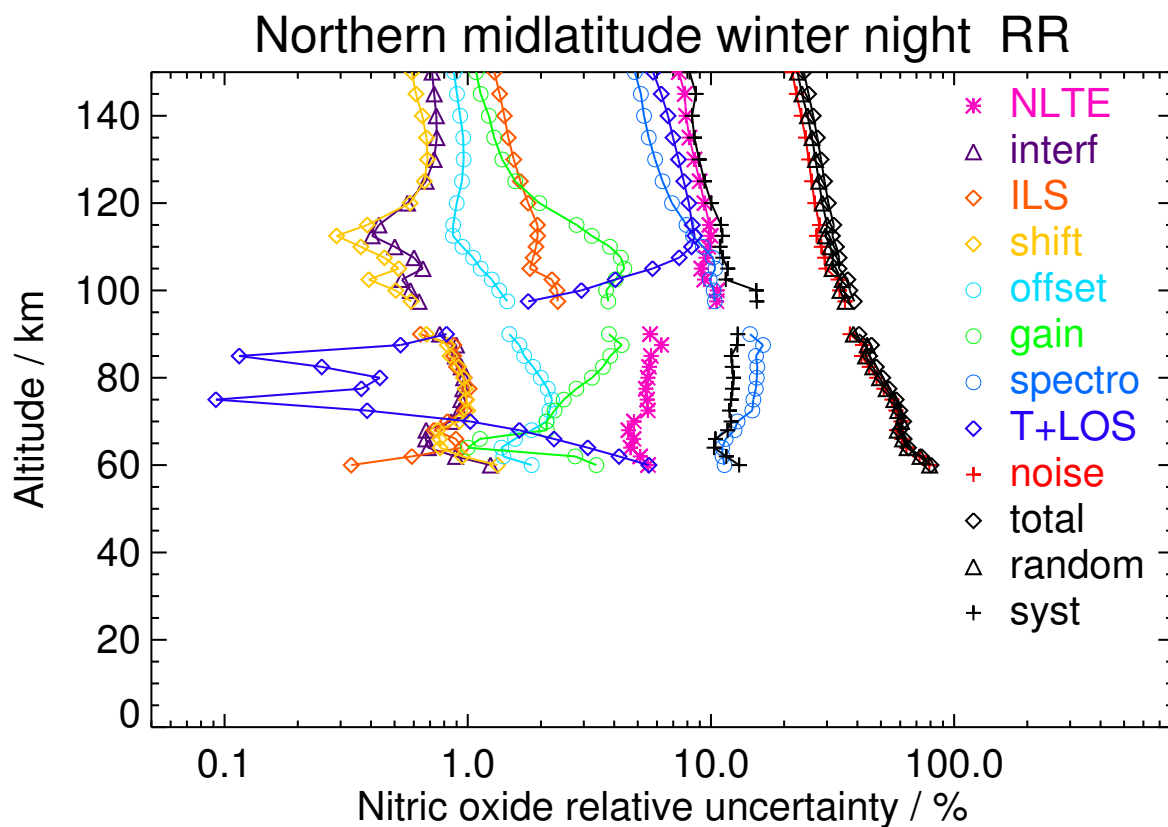

**Figure S44.** V8R\_NO\_261 Northern midlatitude winter night



**Table S46.** Nitric oxide error budget for Northern midlatitude spring day. All uncertainties are  $1\sigma$ .

| altitude (km) | mean target (ppmv) | NLTE (%) | interf (%) | ILS (%) | shift (%) | offset (%) | gain (%) | spectro (%) | T+LOS (%) | noise (%) | random (%) | syst (%) | total (%) |
|---------------|--------------------|----------|------------|---------|-----------|------------|----------|-------------|-----------|-----------|------------|----------|-----------|
| 20            | 0.00               | 1.48     | 0.20       | 1.20    | 0.22      | 0.48       | 2.21     | 8.52        | 1.11      | 22.27     | 22.63      | 8.16     | 24.06     |
| 30            | 0.00               | 11.44    | 0.21       | 1.43    | 0.44      | 1.02       | 2.06     | 12.58       | 1.44      | 23.56     | 24.31      | 16.21    | 29.22     |
| 40            | 0.01               | 4.88     | 0.09       | 1.15    | 0.28      | 0.55       | 2.51     | 10.00       | 0.83      | 16.26     | 16.70      | 10.86    | 19.92     |
| 50            | 0.01               | 1.77     | 0.15       | 1.10    | 0.05      | 0.42       | 1.62     | 8.92        | 0.62      | 28.69     | 28.87      | 8.77     | 30.17     |
| 60            | 0.00               | 10.08    | 0.98       | 1.81    | 0.87      | 2.27       | 1.20     | 8.06        | 2.84      | 64.16     | 64.64      | 11.11    | 65.59     |
| 80            | 0.04               | 11.85    | 1.63       | 2.74    | 1.70      | 3.27       | 3.75     | 9.31        | 1.06      | 58.67     | 59.18      | 14.35    | 60.90     |
| 90            | 0.55               | 14.77    | 1.33       | 1.78    | 1.44      | 2.79       | 2.51     | 9.89        | 0.39      | 50.42     | 51.42      | 15.34    | 53.66     |
| 100           | 4.93               | 18.65    | 1.16       | 1.76    | 1.13      | 2.38       | 2.06     | 7.26        | 0.34      | 43.19     | 43.86      | 18.93    | 47.77     |
| 110           | 26.91              | 17.97    | 1.12       | 1.98    | 0.70      | 1.70       | 1.83     | 7.42        | 8.79      | 32.25     | 34.91      | 17.00    | 38.83     |
| 120           | 32.52              | 19.15    | 0.60       | 1.78    | 0.18      | 0.88       | 0.82     | 10.01       | 8.64      | 14.98     | 22.37      | 16.44    | 27.76     |
| 130           | 62.39              | 19.58    | 0.19       | 1.36    | 0.48      | 0.81       | 1.77     | 9.90        | 6.66      | 10.78     | 18.68      | 17.29    | 25.45     |
| 140           | 105.94             | 19.20    | 0.32       | 1.15    | 0.53      | 0.83       | 2.20     | 9.32        | 5.54      | 11.42     | 17.93      | 17.38    | 24.97     |
| 150           | 147.09             | 18.59    | 0.46       | 1.00    | 0.52      | 0.88       | 2.39     | 8.64        | 4.55      | 12.61     | 17.95      | 16.91    | 24.66     |

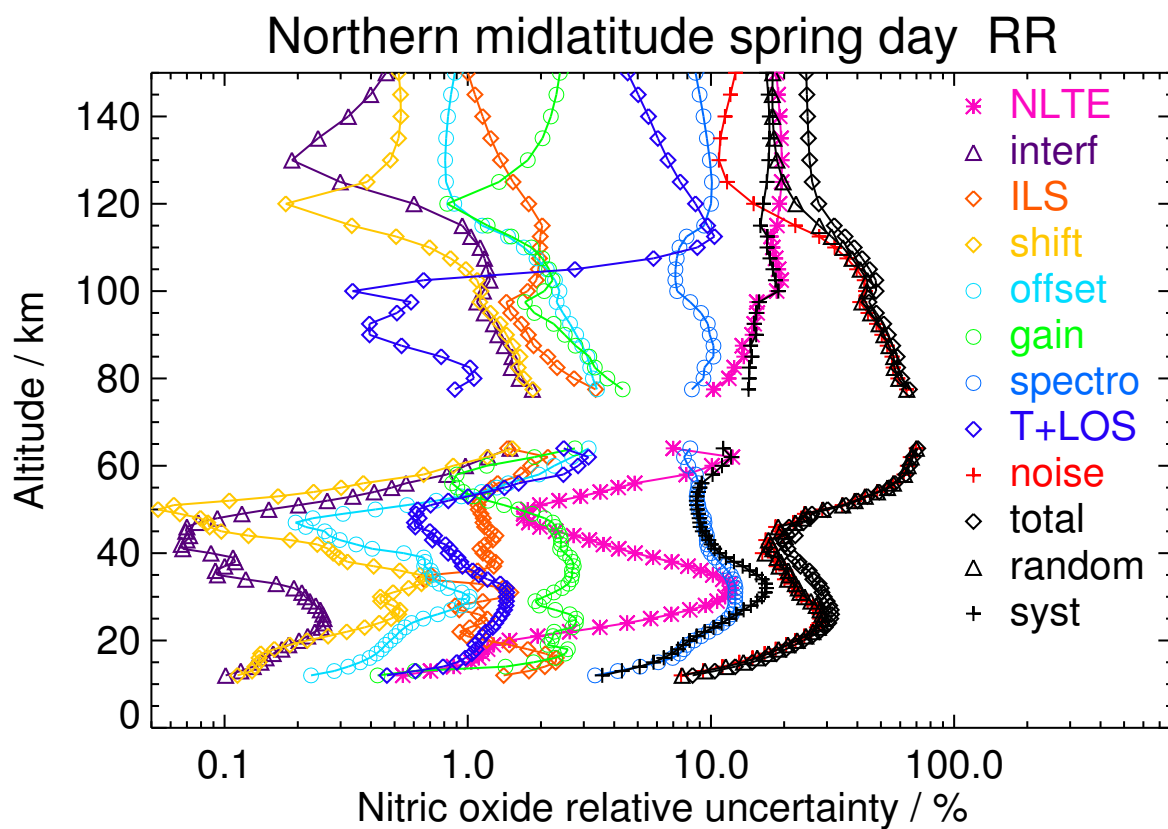

**Figure S45.** V8R\_NO\_261 Northern midlatitude spring day

**Table S47.** Nitric oxide error budget for Northern midlatitude spring night. All uncertainties are  $1\sigma$ .

| altitude (km) | mean target (ppmv) | NLTE (%) | interf (%) | ILS (%) | shift (%) | offset (%) | gain (%) | spectro (%) | T+LOS (%) | noise (%) | random (%) | syst (%) | total (%) |
|---------------|--------------------|----------|------------|---------|-----------|------------|----------|-------------|-----------|-----------|------------|----------|-----------|
| 60            | 0.00               | 7.32     | 1.47       | 1.03    | 1.08      | 2.25       | 2.98     | 12.59       | 5.88      | 98.83     | 99.41      | 12.25    | >100      |
| 80            | 0.02               | 7.11     | 1.36       | 1.86    | 1.28      | 2.26       | 3.46     | 11.00       | 0.77      | 53.72     | 53.98      | 12.97    | 55.51     |
| 90            | 0.31               | 8.13     | 0.93       | 1.88    | 0.86      | 1.85       | 3.73     | 10.89       | 0.10      | 41.51     | 41.82      | 13.45    | 43.93     |
| 100           | 2.78               | 10.90    | 0.99       | 1.23    | 0.94      | 2.12       | 3.82     | 9.94        | 1.09      | 38.30     | 38.41      | 15.27    | 41.33     |
| 110           | 8.49               | 12.64    | 0.59       | 1.58    | 0.39      | 1.00       | 3.08     | 9.73        | 8.32      | 22.85     | 26.24      | 13.07    | 29.31     |
| 120           | 15.38              | 12.55    | 0.45       | 1.66    | 0.49      | 0.82       | 1.69     | 8.17        | 8.67      | 22.46     | 25.69      | 12.26    | 28.47     |
| 130           | 21.13              | 11.69    | 0.65       | 1.47    | 0.63      | 1.03       | 1.32     | 7.21        | 7.68      | 23.03     | 25.55      | 11.43    | 27.99     |
| 140           | 28.79              | 10.89    | 0.73       | 1.36    | 0.64      | 1.06       | 1.24     | 6.63        | 6.85      | 22.75     | 24.84      | 10.73    | 27.06     |
| 150           | 35.40              | 10.02    | 0.74       | 1.24    | 0.60      | 1.03       | 1.17     | 6.02        | 5.92      | 21.49     | 23.26      | 9.86     | 25.27     |

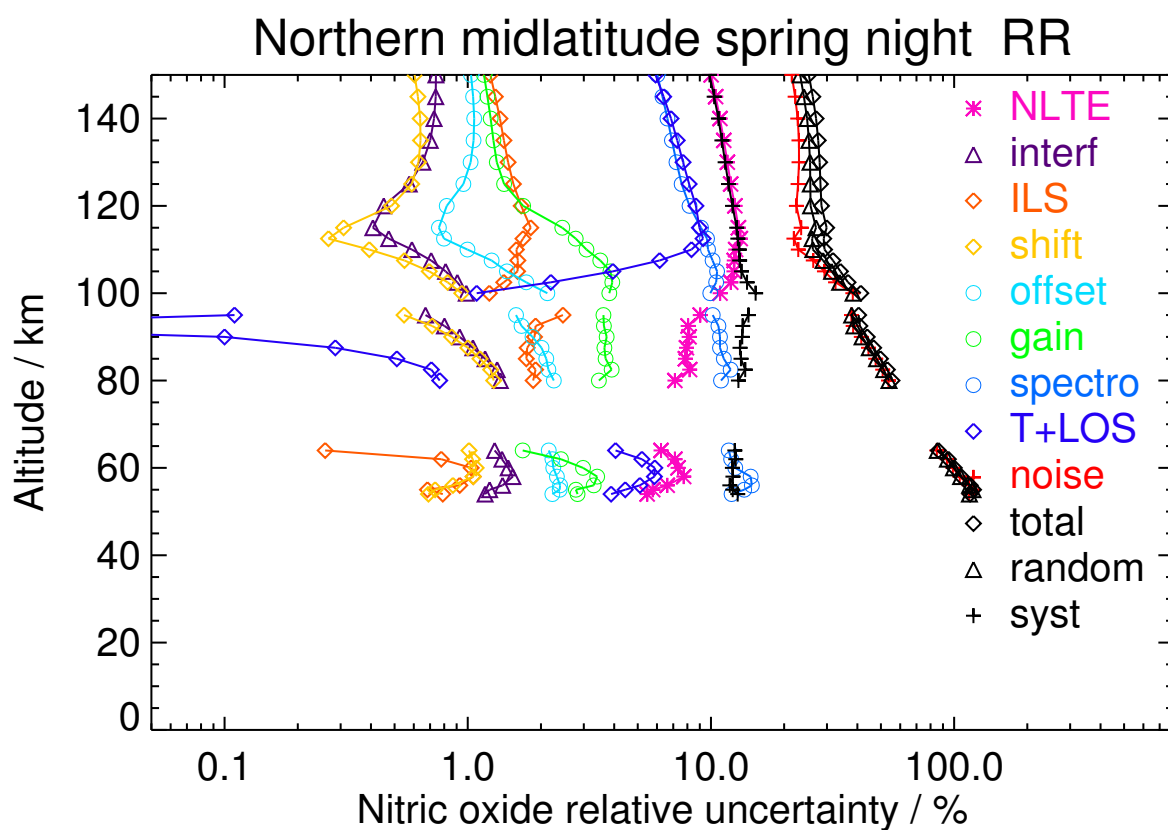

**Figure S46.** V8R\_NO\_261 Northern midlatitude spring night

**Table S48.** Nitric oxide error budget for Northern midlatitude summer day. All uncertainties are  $1\sigma$ .

| altitude (km) | mean target (ppmv) | NLTE (%) | interf (%) | ILS (%) | shift (%) | offset (%) | gain (%) | spectro (%) | T+LOS (%) | noise (%) | random (%) | syst (%) | total (%) |
|---------------|--------------------|----------|------------|---------|-----------|------------|----------|-------------|-----------|-----------|------------|----------|-----------|
| 20            | 0.00               | 2.81     | 0.49       | 2.58    | 0.24      | 0.58       | 8.08     | 10.49       | 2.29      | 22.80     | 23.64      | 12.50    | 26.75     |
| 30            | 0.00               | 11.24    | 0.23       | 1.55    | 0.33      | 0.89       | 1.26     | 12.98       | 1.57      | 23.10     | 23.53      | 16.80    | 28.91     |
| 40            | 0.01               | 5.29     | 0.09       | 0.88    | 0.25      | 0.53       | 2.63     | 9.69        | 0.91      | 13.91     | 14.21      | 11.07    | 18.01     |
| 50            | 0.01               | 1.90     | 0.08       | 0.76    | 0.06      | 0.24       | 1.76     | 8.27        | 0.63      | 19.29     | 19.44      | 8.38     | 21.17     |
| 60            | 0.00               | 8.77     | 0.88       | 1.23    | 0.90      | 2.24       | 1.35     | 8.15        | 1.68      | 63.71     | 64.09      | 10.39    | 64.92     |
| 90            | 0.44               | 14.27    | 1.33       | 1.78    | 1.53      | 2.98       | 3.41     | 8.81        | 0.91      | 52.17     | 52.95      | 15.10    | 55.06     |
| 100           | 3.30               | 14.64    | 1.29       | 1.57    | 1.22      | 2.44       | 2.53     | 9.46        | 1.00      | 43.20     | 44.18      | 15.38    | 46.78     |
| 110           | 14.81              | 18.15    | 1.18       | 1.30    | 0.62      | 1.74       | 1.38     | 8.69        | 9.10      | 30.92     | 33.97      | 17.27    | 38.11     |
| 120           | 32.23              | 20.70    | 0.61       | 1.33    | 0.27      | 0.99       | 2.91     | 9.17        | 8.55      | 14.57     | 21.55      | 18.58    | 28.45     |
| 130           | 70.02              | 23.34    | 0.28       | 1.41    | 0.63      | 0.96       | 4.25     | 9.67        | 6.93      | 10.52     | 20.61      | 19.85    | 28.61     |
| 140           | 127.63             | 24.14    | 0.40       | 0.99    | 0.67      | 0.98       | 4.14     | 9.57        | 5.88      | 11.17     | 21.14      | 20.15    | 29.21     |
| 150           | 174.87             | 24.68    | 0.57       | 0.50    | 0.62      | 1.00       | 3.74     | 9.14        | 4.87      | 12.43     | 22.28      | 19.76    | 29.78     |

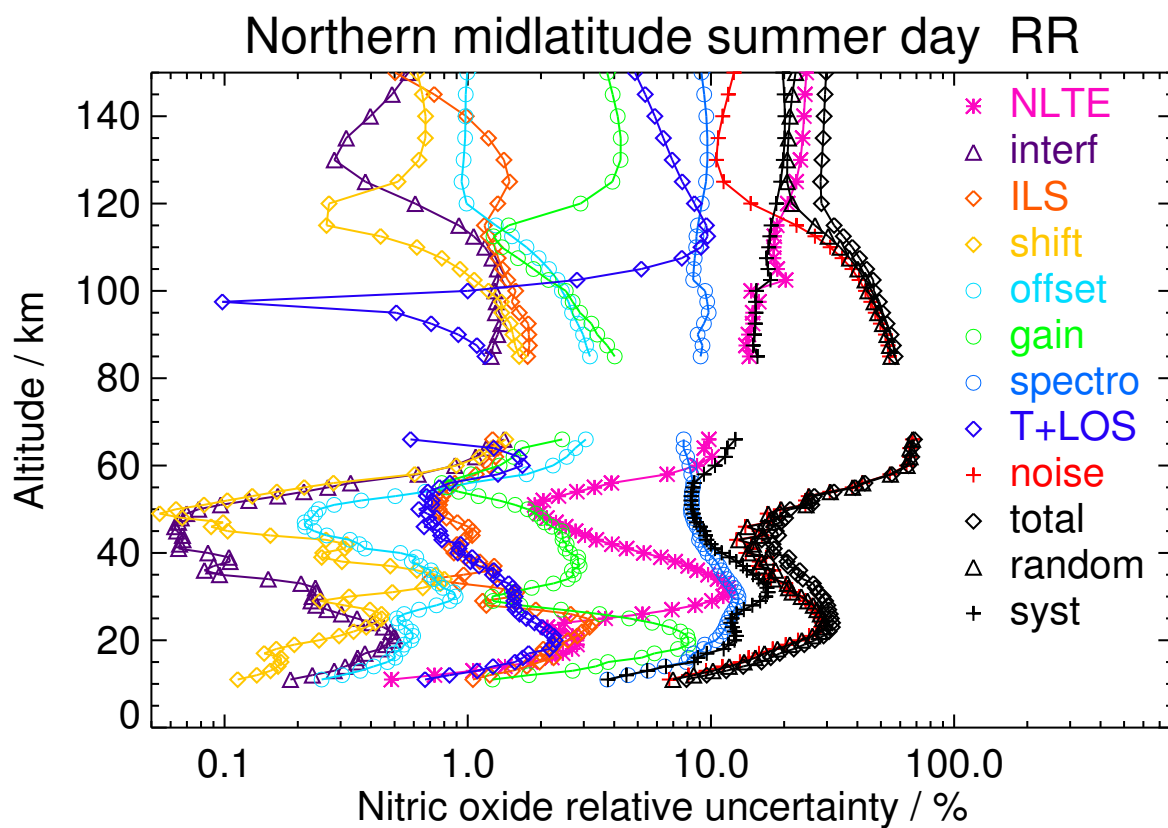

**Figure S47.** V8R\_NO\_261 Northern midlatitude summer day

**Table S49.** Nitric oxide error budget for Northern midlatitude summer night. All uncertainties are  $1\sigma$ .

| altitude (km) | mean target (ppmv) | NLTE (%) | interf (%) | ILS (%) | shift (%) | offset (%) | gain (%) | spectro (%) | T+LOS (%) | noise (%) | random (%) | syst (%) | total (%) |
|---------------|--------------------|----------|------------|---------|-----------|------------|----------|-------------|-----------|-----------|------------|----------|-----------|
| 60            | 0.00               | 8.98     | 1.34       | 1.55    | 0.86      | 2.56       | 6.13     | 17.59       | 4.69      | 94.42     | 95.51      | 15.96    | 96.83     |
| 90            | 0.30               | 10.09    | 0.68       | 1.49    | 0.73      | 1.72       | 3.98     | 12.34       | 0.66      | 36.19     | 36.26      | 16.48    | 39.83     |
| 100           | 3.22               | 11.25    | 0.88       | 0.84    | 0.76      | 1.48       | 3.24     | 11.42       | 2.79      | 28.74     | 28.94      | 16.36    | 33.24     |
| 110           | 7.00               | 14.33    | 0.44       | 1.19    | 0.26      | 0.90       | 2.04     | 9.19        | 10.05     | 23.03     | 26.62      | 14.80    | 30.46     |
| 120           | 17.16              | 14.16    | 0.56       | 0.99    | 0.54      | 1.03       | 1.20     | 7.82        | 9.70      | 22.00     | 25.44      | 14.02    | 29.05     |
| 130           | 24.43              | 12.97    | 0.79       | 0.86    | 0.63      | 1.16       | 1.23     | 6.86        | 8.46      | 21.93     | 24.64      | 12.85    | 27.79     |
| 140           | 32.83              | 11.85    | 0.83       | 0.79    | 0.61      | 1.14       | 1.23     | 6.19        | 7.52      | 21.07     | 23.30      | 11.87    | 26.15     |
| 150           | 39.96              | 10.72    | 0.81       | 0.72    | 0.56      | 1.07       | 1.18     | 5.57        | 6.48      | 19.60     | 21.39      | 10.89    | 24.00     |

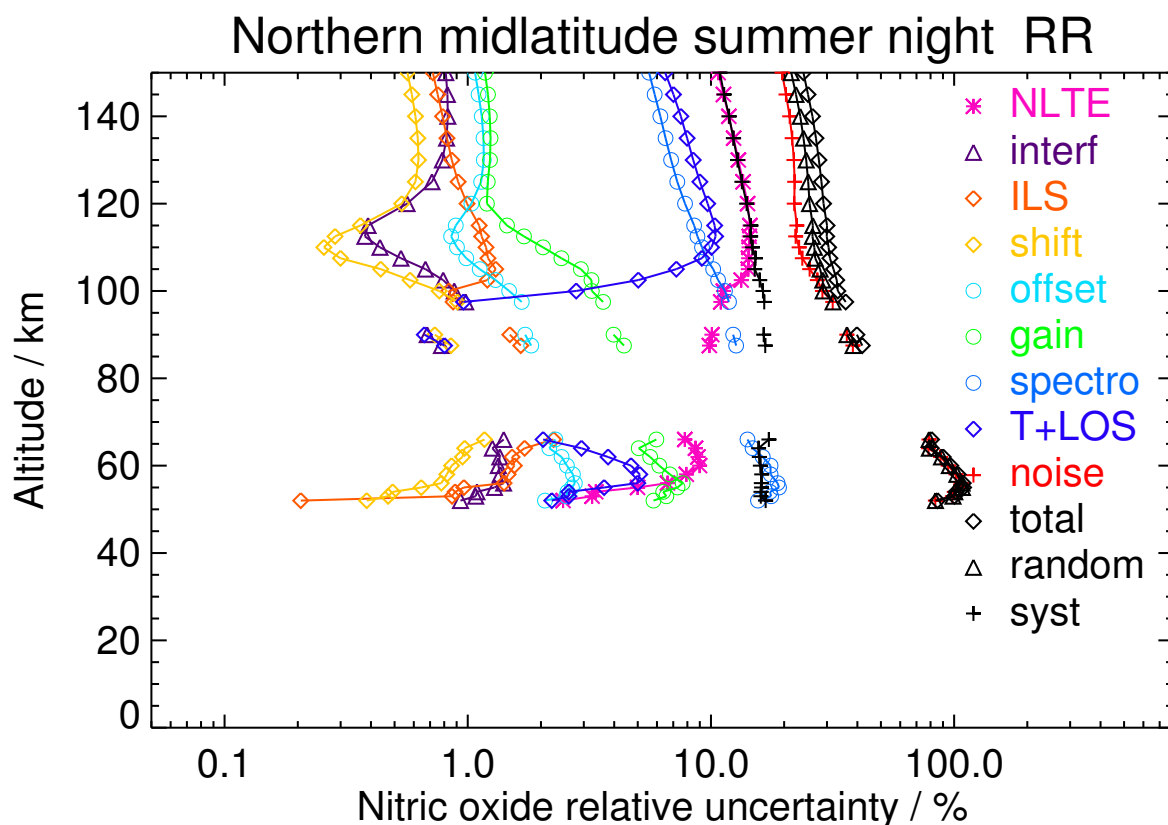

**Figure S48.** V8R\_NO\_261 Northern midlatitude summer night

**Table S50.** Nitric oxide error budget for Northern midlatitude autumn day. All uncertainties are  $1\sigma$ .

| altitude (km) | mean target (ppmv) | NLTE (%) | interf (%) | ILS (%) | shift (%) | offset (%) | gain (%) | spectro (%) | T+LOS (%) | noise (%) | random (%) | syst (%) | total (%) |
|---------------|--------------------|----------|------------|---------|-----------|------------|----------|-------------|-----------|-----------|------------|----------|-----------|
| 20            | 0.00               | 2.11     | 0.35       | 1.90    | 0.22      | 0.50       | 5.73     | 8.54        | 1.75      | 23.84     | 24.41      | 9.46     | 26.18     |
| 30            | 0.00               | 11.29    | 0.25       | 1.14    | 0.40      | 0.98       | 2.04     | 13.13       | 1.61      | 25.97     | 26.53      | 16.72    | 31.36     |
| 40            | 0.01               | 6.84     | 0.08       | 1.24    | 0.32      | 0.70       | 2.93     | 9.83        | 1.05      | 16.83     | 17.10      | 12.09    | 20.94     |
| 50            | 0.01               | 2.48     | 0.11       | 1.02    | 0.05      | 0.37       | 1.60     | 8.87        | 0.70      | 25.08     | 25.23      | 9.02     | 26.80     |
| 60            | 0.00               | 5.72     | 0.74       | 1.36    | 0.59      | 2.02       | 1.22     | 9.23        | 2.18      | 61.68     | 61.95      | 9.86     | 62.73     |
| 80            | 0.04               | 9.69     | 1.09       | 1.25    | 0.90      | 2.90       | 1.99     | 10.84       | 0.78      | 53.77     | 54.55      | 11.99    | 55.85     |
| 90            | 0.45               | 8.35     | 0.87       | 1.17    | 0.80      | 2.50       | 1.73     | 9.65        | 0.38      | 48.21     | 48.67      | 11.42    | 49.99     |
| 100           | 3.30               | 9.59     | 0.87       | 0.68    | 0.62      | 2.44       | 0.73     | 6.66        | 0.27      | 43.67     | 43.76      | 11.71    | 45.30     |
| 110           | 12.48              | 8.31     | 0.56       | 0.65    | 0.29      | 1.27       | 0.62     | 7.53        | 3.73      | 24.33     | 25.11      | 10.19    | 27.10     |
| 120           | 12.91              | 11.92    | 0.16       | 0.69    | 0.21      | 1.09       | 1.38     | 7.70        | 7.33      | 19.59     | 21.71      | 13.08    | 25.35     |
| 130           | 25.19              | 12.37    | 0.35       | 0.54    | 0.39      | 1.31       | 2.00     | 7.14        | 6.86      | 20.45     | 22.31      | 13.33    | 25.99     |
| 140           | 47.45              | 12.10    | 0.45       | 0.51    | 0.45      | 1.38       | 2.36     | 6.72        | 6.25      | 21.17     | 22.67      | 13.15    | 26.21     |
| 150           | 72.61              | 11.50    | 0.50       | 0.53    | 0.48      | 1.37       | 2.57     | 6.23        | 5.51      | 20.91     | 22.16      | 12.53    | 25.46     |

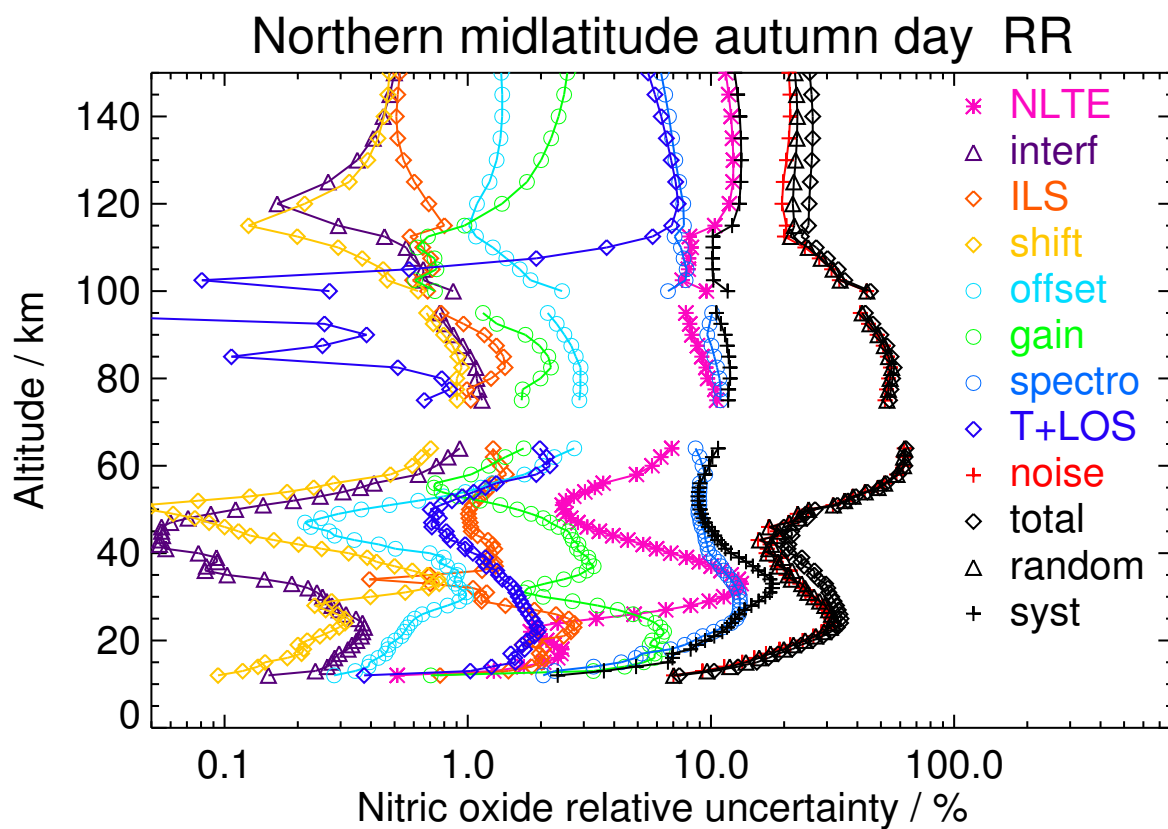

**Figure S49.** V8R\_NO\_261 Northern midlatitude autumn day

**Table S51.** Nitric oxide error budget for Northern midlatitude autumn night. All uncertainties are  $1\sigma$ .

| altitude (km) | mean target (ppmv) | NLTE (%) | interf (%) | ILS (%) | shift (%) | offset (%) | gain (%) | spectro (%) | T+LOS (%) | noise (%) | random (%) | syst (%) | total (%) |
|---------------|--------------------|----------|------------|---------|-----------|------------|----------|-------------|-----------|-----------|------------|----------|-----------|
| 60            | 0.00               | 8.95     | 1.10       | 2.06    | 0.53      | 2.19       | 5.78     | 13.30       | 5.41      | 95.82     | 96.14      | 16.36    | 97.53     |
| 90            | 0.14               | 6.60     | 0.53       | 2.15    | 0.28      | 1.50       | 4.34     | 9.16        | 1.14      | 49.65     | 49.85      | 11.65    | 51.19     |
| 100           | 1.00               | 11.00    | 0.53       | 1.57    | 0.30      | 1.49       | 2.64     | 10.69       | 0.95      | 35.19     | 35.24      | 15.63    | 38.55     |
| 110           | 5.20               | 9.25     | 0.29       | 1.15    | 0.13      | 0.90       | 1.29     | 8.65        | 6.67      | 30.39     | 31.64      | 11.45    | 33.65     |
| 120           | 9.58               | 12.20    | 0.48       | 1.27    | 0.41      | 1.02       | 1.60     | 8.73        | 7.65      | 31.56     | 33.77      | 12.03    | 35.85     |
| 130           | 12.99              | 11.39    | 0.62       | 1.14    | 0.49      | 1.11       | 1.76     | 7.81        | 6.97      | 29.71     | 31.69      | 11.13    | 33.59     |
| 140           | 16.94              | 10.40    | 0.65       | 1.06    | 0.49      | 1.11       | 1.73     | 7.06        | 6.32      | 28.37     | 30.01      | 10.39    | 31.76     |
| 150           | 20.24              | 9.35     | 0.63       | 0.97    | 0.46      | 1.06       | 1.63     | 6.31        | 5.56      | 26.24     | 27.60      | 9.49     | 29.19     |

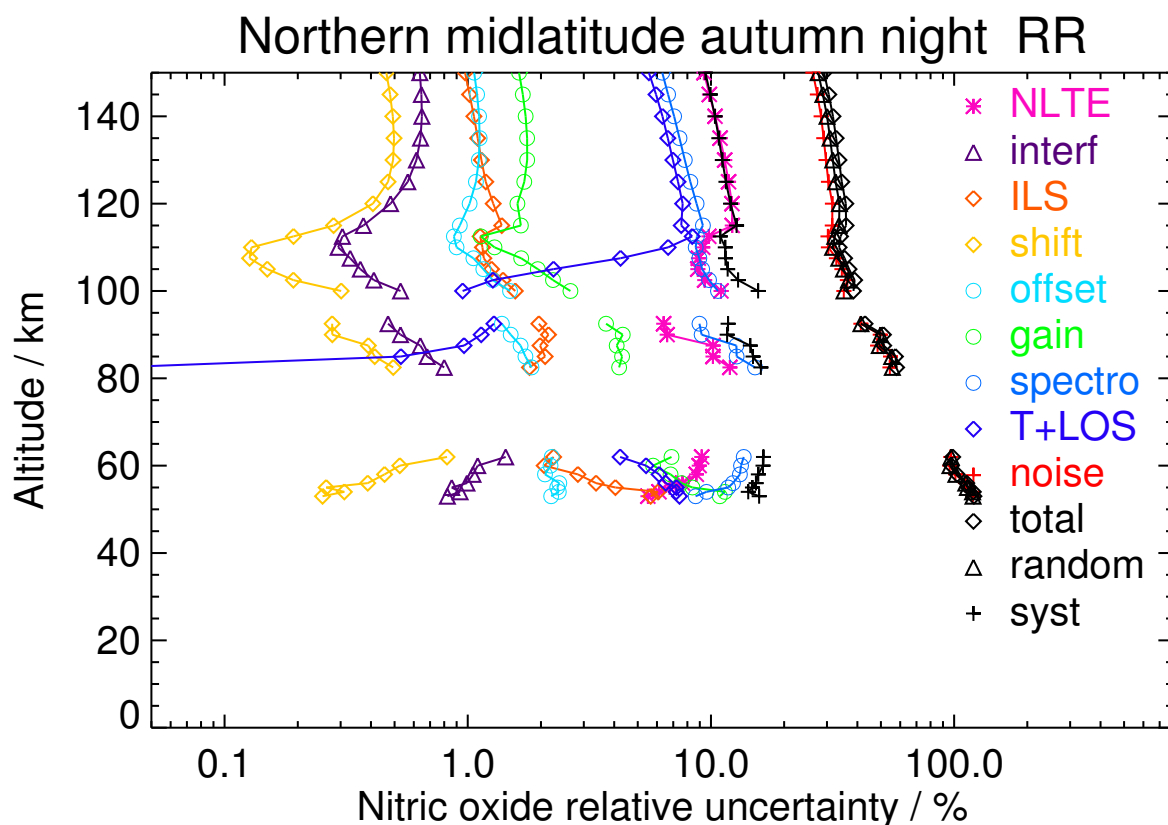

**Figure S50.** V8R\_NO\_261 Northern midlatitude autumn night

**Table S52.** Nitric oxide error budget for Tropics day. All uncertainties are  $1\sigma$ .

| altitude (km) | mean target (ppmv) | NLTE (%) | interf (%) | ILS (%) | shift (%) | offset (%) | gain (%) | spectro (%) | T+LOS (%) | noise (%) | random (%) | syst (%) | total (%) |
|---------------|--------------------|----------|------------|---------|-----------|------------|----------|-------------|-----------|-----------|------------|----------|-----------|
| 20            | 0.00               | 1.93     | 0.72       | 2.32    | 0.37      | 0.79       | 4.25     | 11.36       | 2.19      | 25.39     | 26.10      | 11.22    | 28.41     |
| 30            | 0.00               | 9.85     | 0.23       | 3.15    | 0.59      | 1.12       | 1.82     | 14.72       | 1.60      | 31.41     | 31.96      | 17.21    | 36.30     |
| 40            | 0.01               | 4.73     | 0.06       | 1.03    | 0.33      | 0.50       | 2.60     | 9.30        | 1.02      | 11.87     | 12.25      | 10.44    | 16.10     |
| 50            | 0.01               | 1.68     | 0.08       | 1.18    | 0.06      | 0.26       | 1.75     | 9.11        | 0.68      | 23.03     | 23.23      | 9.05     | 24.93     |
| 60            | 0.00               | 6.65     | 0.52       | 1.58    | 0.83      | 2.37       | 1.26     | 8.95        | 2.00      | 64.10     | 64.36      | 10.31    | 65.18     |
| 90            | 0.23               | 8.89     | 0.68       | 0.97    | 1.52      | 3.09       | 2.80     | 10.64       | 0.73      | 47.98     | 48.17      | 14.02    | 50.16     |
| 100           | 2.47               | 10.95    | 0.64       | 1.58    | 1.27      | 2.63       | 2.92     | 9.78        | 0.14      | 43.54     | 43.99      | 14.02    | 46.17     |
| 110           | 11.03              | 9.76     | 0.44       | 1.15    | 0.69      | 1.65       | 1.66     | 9.07        | 5.69      | 28.24     | 29.19      | 12.77    | 31.86     |
| 120           | 17.67              | 14.76    | 0.12       | 1.16    | 0.14      | 0.89       | 0.64     | 9.26        | 7.98      | 14.13     | 17.21      | 16.54    | 23.87     |
| 130           | 37.53              | 16.10    | 0.14       | 0.96    | 0.38      | 1.02       | 1.12     | 9.10        | 6.78      | 12.39     | 15.73      | 17.24    | 23.34     |
| 140           | 67.58              | 16.10    | 0.22       | 0.88    | 0.46      | 1.09       | 1.42     | 8.71        | 5.90      | 13.13     | 16.00      | 17.04    | 23.37     |
| 150           | 92.88              | 15.39    | 0.27       | 0.79    | 0.48      | 1.08       | 1.58     | 8.08        | 5.02      | 13.60     | 15.91      | 16.24    | 22.73     |

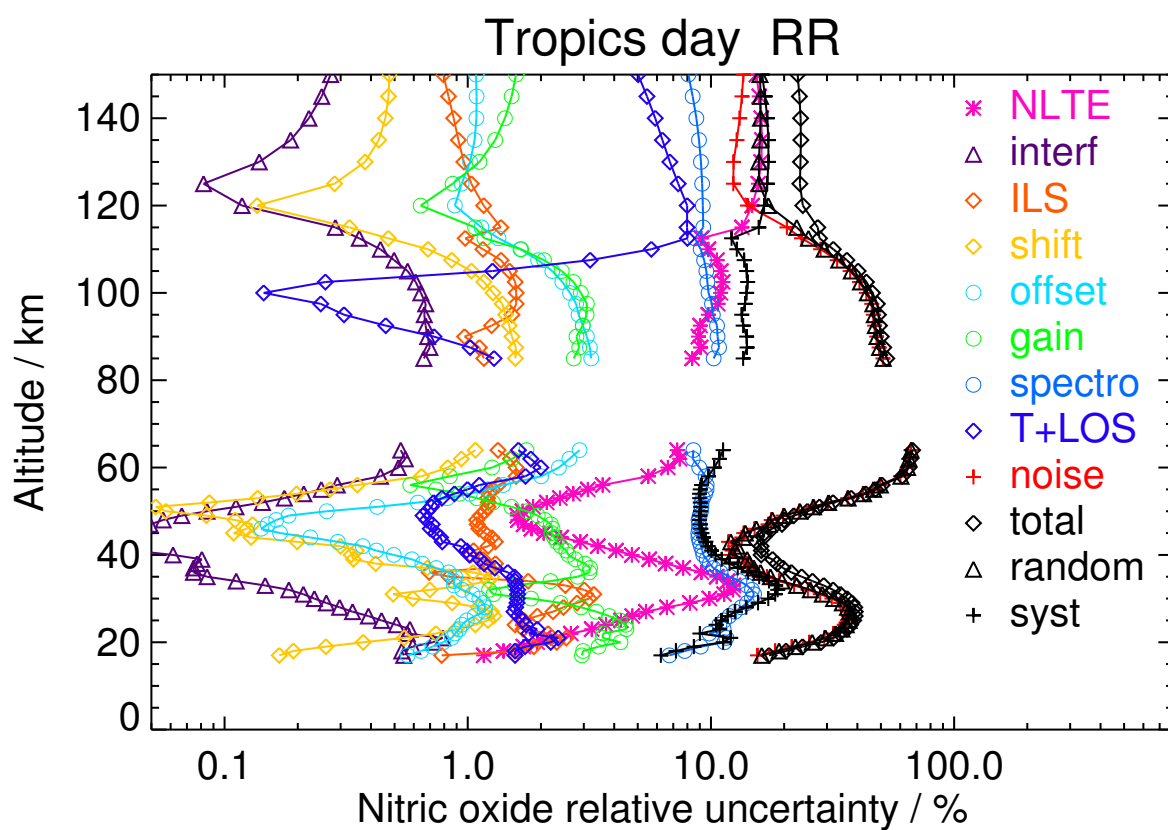

**Figure S51.** V8R\_NO\_261 Tropics day

**Table S53.** Nitric oxide error budget for Tropics night. All uncertainties are  $1\sigma$ .

| altitude (km) | mean target (ppmv) | NLTE (%) | interf (%) | ILS (%) | shift (%) | offset (%) | gain (%) | spectro (%) | T+LOS (%) | noise (%) | random (%) | syst (%) | total (%) |
|---------------|--------------------|----------|------------|---------|-----------|------------|----------|-------------|-----------|-----------|------------|----------|-----------|
| 60            | 0.00               | 8.31     | 0.72       | 1.75    | 0.67      | 2.38       | 4.38     | 11.87       | 6.72      | 75.12     | 75.68      | 14.17    | 76.99     |
| 100           | 0.90               | 9.10     | 0.47       | 1.14    | 0.38      | 1.41       | 3.09     | 11.51       | 0.44      | 35.73     | 36.12      | 14.17    | 38.80     |
| 110           | 5.10               | 12.00    | 0.38       | 1.53    | 0.22      | 1.00       | 2.77     | 10.20       | 4.91      | 29.00     | 30.43      | 14.09    | 33.53     |
| 120           | 10.46              | 12.60    | 0.32       | 1.58    | 0.39      | 1.00       | 1.81     | 9.00        | 8.49      | 27.27     | 29.56      | 13.74    | 32.60     |
| 130           | 14.79              | 11.52    | 0.33       | 1.42    | 0.47      | 1.08       | 1.33     | 7.99        | 7.73      | 25.53     | 27.50      | 12.54    | 30.22     |
| 140           | 19.78              | 10.62    | 0.33       | 1.32    | 0.47      | 1.07       | 1.14     | 7.31        | 6.97      | 24.06     | 25.76      | 11.62    | 28.26     |
| 150           | 21.92              | 9.66     | 0.31       | 1.21    | 0.44      | 1.01       | 0.99     | 6.62        | 6.03      | 22.06     | 23.46      | 10.67    | 25.77     |

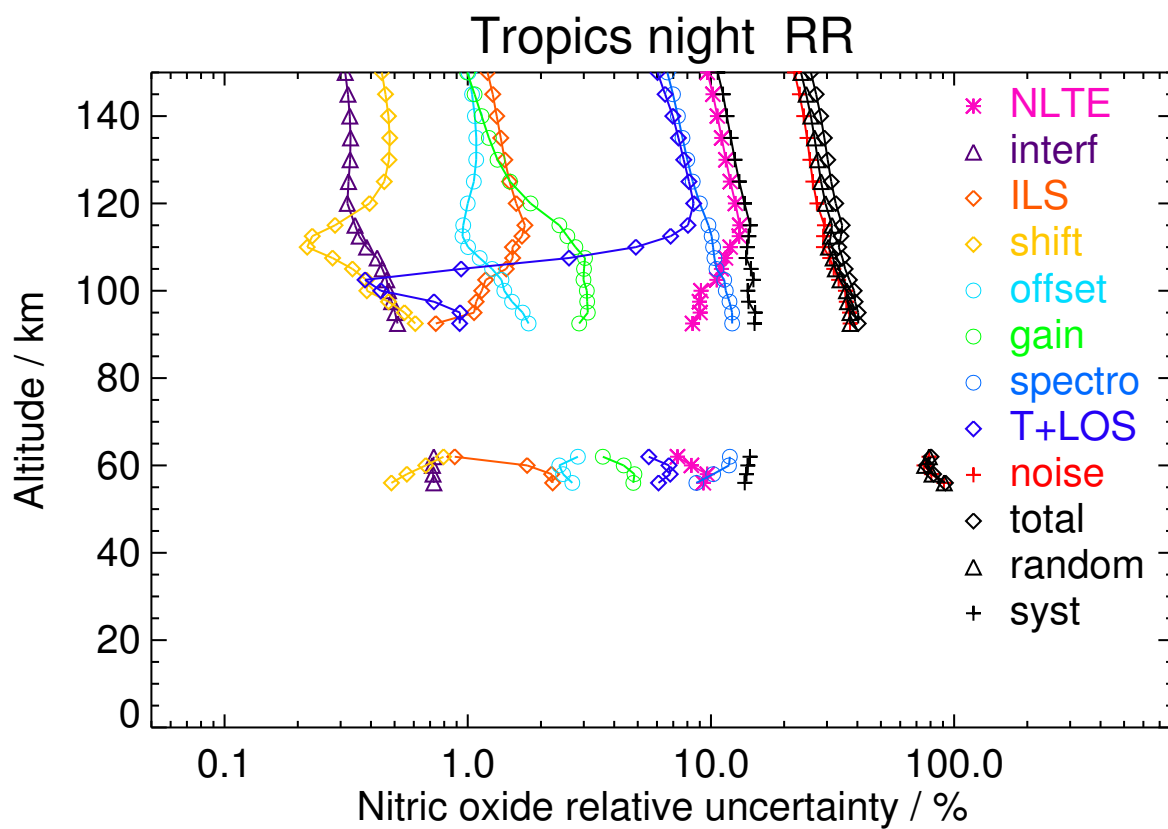

**Figure S52.** V8R\_NO\_261 Tropics night



**Table S54.** Nitric oxide error budget for Southern midlatitude winter day. All uncertainties are  $1\sigma$ .

| altitude (km) | mean target (ppmv) | NLTE (%) | interf (%) | ILS (%) | shift (%) | offset (%) | gain (%) | spectro (%) | T+LOS (%) | noise (%) | random (%) | syst (%) | total (%) |
|---------------|--------------------|----------|------------|---------|-----------|------------|----------|-------------|-----------|-----------|------------|----------|-----------|
| 20            | 0.00               | 2.90     | 0.19       | 0.99    | 0.17      | 0.71       | 0.99     | 8.28        | 0.75      | 25.38     | 25.79      | 7.67     | 26.91     |
| 30            | 0.01               | 14.23    | 0.74       | 1.92    | 0.93      | 1.86       | 5.88     | 24.25       | 2.62      | 39.13     | 43.29      | 22.31    | 48.70     |
| 40            | 0.01               | 13.30    | 0.14       | 2.27    | 0.30      | 1.04       | 2.50     | 12.05       | 1.28      | 31.32     | 32.92      | 15.30    | 36.30     |
| 50            | 0.01               | 2.25     | 0.13       | 0.71    | 0.10      | 0.58       | 1.18     | 8.39        | 0.93      | 33.87     | 34.11      | 7.88     | 35.01     |
| 60            | 0.01               | 6.71     | 0.28       | 1.16    | 0.29      | 1.69       | 1.88     | 14.67       | 2.03      | 51.74     | 53.51      | 9.25     | 54.30     |
| 70            | 0.02               | 16.04    | 0.40       | 1.92    | 0.47      | 2.16       | 1.73     | 12.08       | 0.06      | 45.13     | 47.89      | 12.58    | 49.51     |
| 80            | 0.08               | 19.15    | 0.46       | 1.41    | 0.67      | 2.45       | 2.36     | 12.10       | 1.12      | 44.55     | 48.09      | 14.17    | 50.13     |
| 90            | 0.93               | 15.15    | 0.37       | 1.22    | 0.60      | 2.12       | 2.10     | 11.19       | 0.11      | 38.41     | 40.91      | 12.94    | 42.91     |
| 100           | 7.12               | 13.58    | 0.36       | 1.28    | 0.53      | 1.62       | 1.96     | 11.92       | 0.34      | 29.52     | 32.22      | 12.98    | 34.73     |
| 110           | 43.17              | 13.24    | 0.27       | 1.54    | 0.19      | 0.91       | 1.25     | 11.86       | 6.27      | 17.02     | 21.97      | 12.94    | 25.49     |
| 120           | 58.55              | 24.90    | 0.14       | 2.19    | 0.28      | 1.21       | 2.09     | 14.00       | 7.68      | 15.27     | 29.49      | 15.78    | 33.44     |
| 130           | 72.53              | 27.97    | 0.28       | 2.16    | 0.35      | 1.31       | 2.01     | 13.12       | 6.14      | 18.01     | 32.25      | 16.95    | 36.43     |
| 140           | 79.90              | 24.23    | 0.37       | 1.77    | 0.35      | 1.35       | 2.07     | 10.80       | 5.19      | 20.10     | 29.71      | 16.18    | 33.83     |
| 150           | 99.99              | 20.12    | 0.40       | 1.41    | 0.35      | 1.36       | 2.02     | 8.74        | 4.40      | 20.79     | 26.82      | 14.90    | 30.68     |

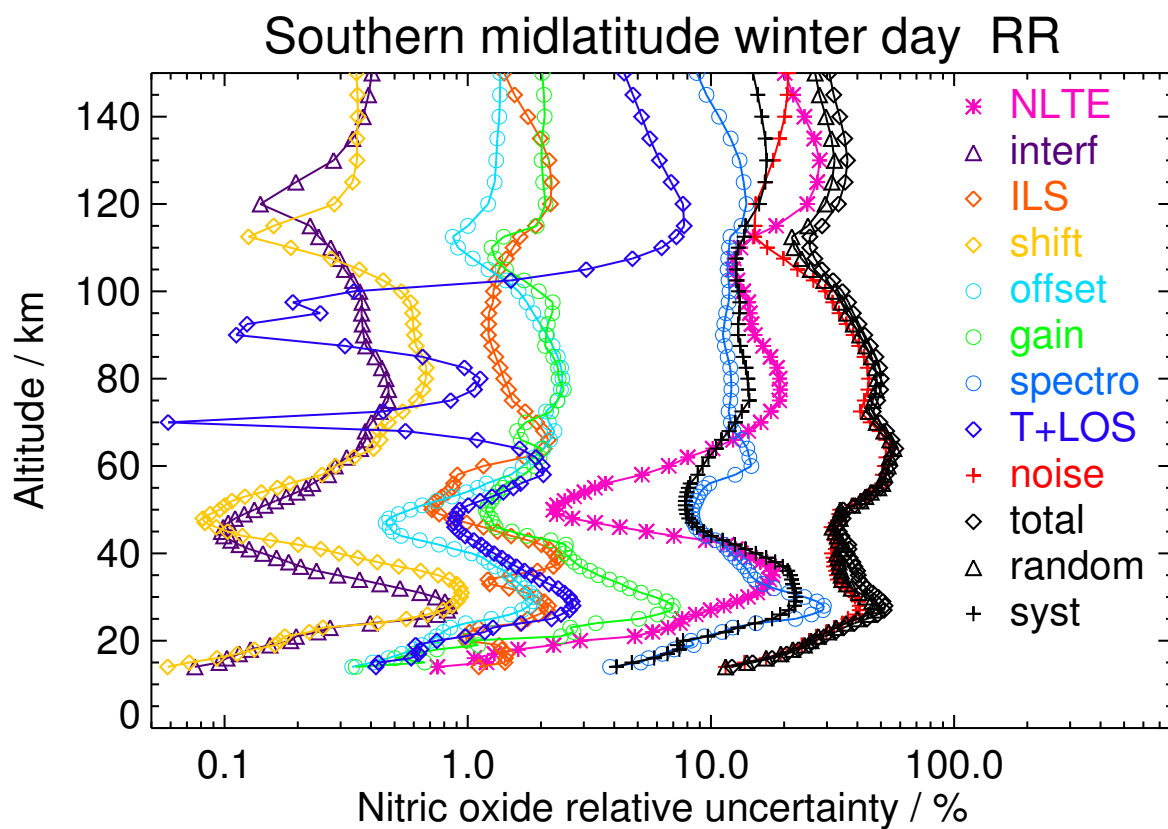

**Figure S53.** V8R\_NO\_261 Southern midlatitude winter day

**Table S55.** Nitric oxide error budget for Southern midlatitude winter night. All uncertainties are  $1\sigma$ .

| altitude (km) | mean target (ppmv) | NLTE (%) | interf (%) | ILS (%) | shift (%) | offset (%) | gain (%) | spectro (%) | T+LOS (%) | noise (%) | random (%) | syst (%) | total (%) |
|---------------|--------------------|----------|------------|---------|-----------|------------|----------|-------------|-----------|-----------|------------|----------|-----------|
| 50            | 0.00               | 1.53     | 0.18       | 0.22    | 0.15      | 0.99       | 0.46     | 7.68        | 1.47      | 55.29     | 55.32      | 7.85     | 55.87     |
| 60            | 0.00               | 3.39     | 0.44       | 0.97    | 0.29      | 2.13       | 2.59     | 11.09       | 3.48      | 77.46     | 78.00      | 8.61     | 78.48     |
| 70            | 0.02               | 5.73     | 0.40       | 1.01    | 0.41      | 1.93       | 2.14     | 12.42       | 0.77      | 61.42     | 62.14      | 10.43    | 63.01     |
| 80            | 0.07               | 7.55     | 0.43       | 1.00    | 0.53      | 2.09       | 1.89     | 15.99       | 0.81      | 46.66     | 48.89      | 10.48    | 50.00     |
| 90            | 0.78               | 5.45     | 0.26       | 0.61    | 0.30      | 1.77       | 0.82     | 10.84       | 0.43      | 36.40     | 37.00      | 10.38    | 38.42     |
| 100           | 5.84               | 4.68     | 0.17       | 0.32    | 0.21      | 1.52       | 0.46     | 8.73        | 2.80      | 24.78     | 25.39      | 8.84     | 26.88     |
| 110           | 10.85              | 9.07     | 0.17       | 1.04    | 0.09      | 0.77       | 0.88     | 8.78        | 7.28      | 19.39     | 22.44      | 9.34     | 24.30     |
| 120           | 16.68              | 11.65    | 0.26       | 1.05    | 0.33      | 1.09       | 0.97     | 7.99        | 7.21      | 22.77     | 25.91      | 10.09    | 27.81     |
| 130           | 18.89              | 12.03    | 0.33       | 1.01    | 0.38      | 1.22       | 1.19     | 7.45        | 6.32      | 23.28     | 26.24      | 9.89     | 28.04     |
| 140           | 20.38              | 12.05    | 0.34       | 0.99    | 0.37      | 1.19       | 1.26     | 7.16        | 5.64      | 22.25     | 25.12      | 9.82     | 26.97     |
| 150           | 29.27              | 11.76    | 0.31       | 0.93    | 0.32      | 1.13       | 1.33     | 6.77        | 4.84      | 20.61     | 22.83      | 10.73    | 25.23     |

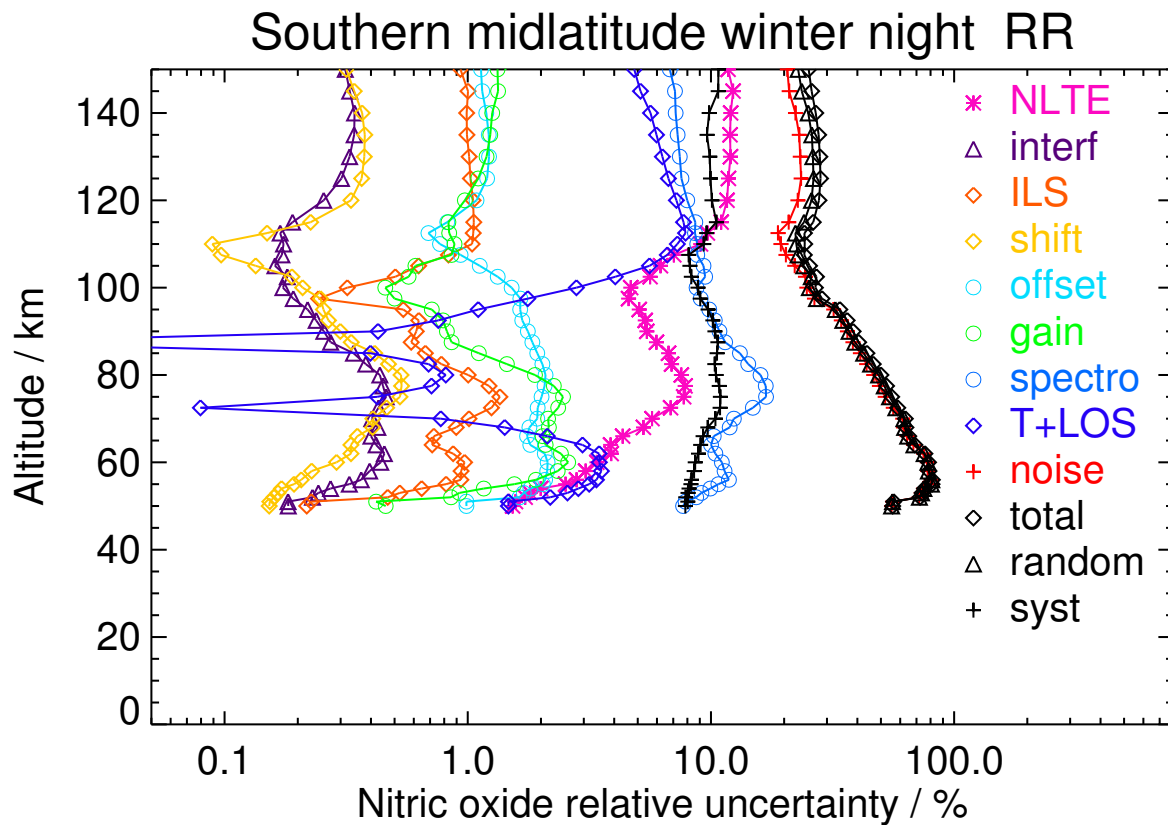

**Figure S54.** V8R\_NO\_261 Southern midlatitude winter night

**Table S56.** Nitric oxide error budget for Southern midlatitude spring day. All uncertainties are  $1\sigma$ .

| altitude (km) | mean target (ppmv) | NLTE (%) | interf (%) | ILS (%) | shift (%) | offset (%) | gain (%) | spectro (%) | T+LOS (%) | noise (%) | random (%) | syst (%) | total (%) |
|---------------|--------------------|----------|------------|---------|-----------|------------|----------|-------------|-----------|-----------|------------|----------|-----------|
| 20            | 0.00               | 2.16     | 0.25       | 2.04    | 0.27      | 0.56       | 2.67     | 10.59       | 1.16      | 20.23     | 21.87      | 7.80     | 23.22     |
| 30            | 0.00               | 8.49     | 0.24       | 1.75    | 0.57      | 0.82       | 2.20     | 12.45       | 1.36      | 22.15     | 22.91      | 14.28    | 26.99     |
| 40            | 0.01               | 5.61     | 0.11       | 1.43    | 0.24      | 0.57       | 1.99     | 9.93        | 0.90      | 17.20     | 17.57      | 11.16    | 20.81     |
| 50            | 0.01               | 1.98     | 0.17       | 1.14    | 0.11      | 0.40       | 1.18     | 8.51        | 0.68      | 25.68     | 25.83      | 8.48     | 27.19     |
| 60            | 0.00               | 9.50     | 0.99       | 1.36    | 1.09      | 2.28       | 1.69     | 9.34        | 2.58      | 66.11     | 66.48      | 12.12    | 67.57     |
| 90            | 0.32               | 18.66    | 1.71       | 1.87    | 1.81      | 3.06       | 3.99     | 10.15       | 0.04      | 55.72     | 56.17      | 20.86    | 59.92     |
| 100           | 2.88               | 19.96    | 1.63       | 2.17    | 1.61      | 2.59       | 3.31     | 10.00       | 0.01      | 46.16     | 47.09      | 20.96    | 51.55     |
| 110           | 23.89              | 18.36    | 1.39       | 1.91    | 0.94      | 1.78       | 2.11     | 9.84        | 9.90      | 31.91     | 34.55      | 19.24    | 39.55     |
| 120           | 51.58              | 18.44    | 0.64       | 1.50    | 0.13      | 0.87       | 0.91     | 10.07       | 9.48      | 13.34     | 18.79      | 18.99    | 26.71     |
| 130           | 92.71              | 19.65    | 0.19       | 1.28    | 0.36      | 0.75       | 1.21     | 9.63        | 6.70      | 8.72      | 14.18      | 20.06    | 24.57     |
| 140           | 153.55             | 19.99    | 0.47       | 1.23    | 0.41      | 0.77       | 1.49     | 9.16        | 5.25      | 10.02     | 14.25      | 20.32    | 24.82     |
| 150           | 211.68             | 19.74    | 0.67       | 1.18    | 0.40      | 0.82       | 1.67     | 8.52        | 4.10      | 11.83     | 15.13      | 19.89    | 24.99     |

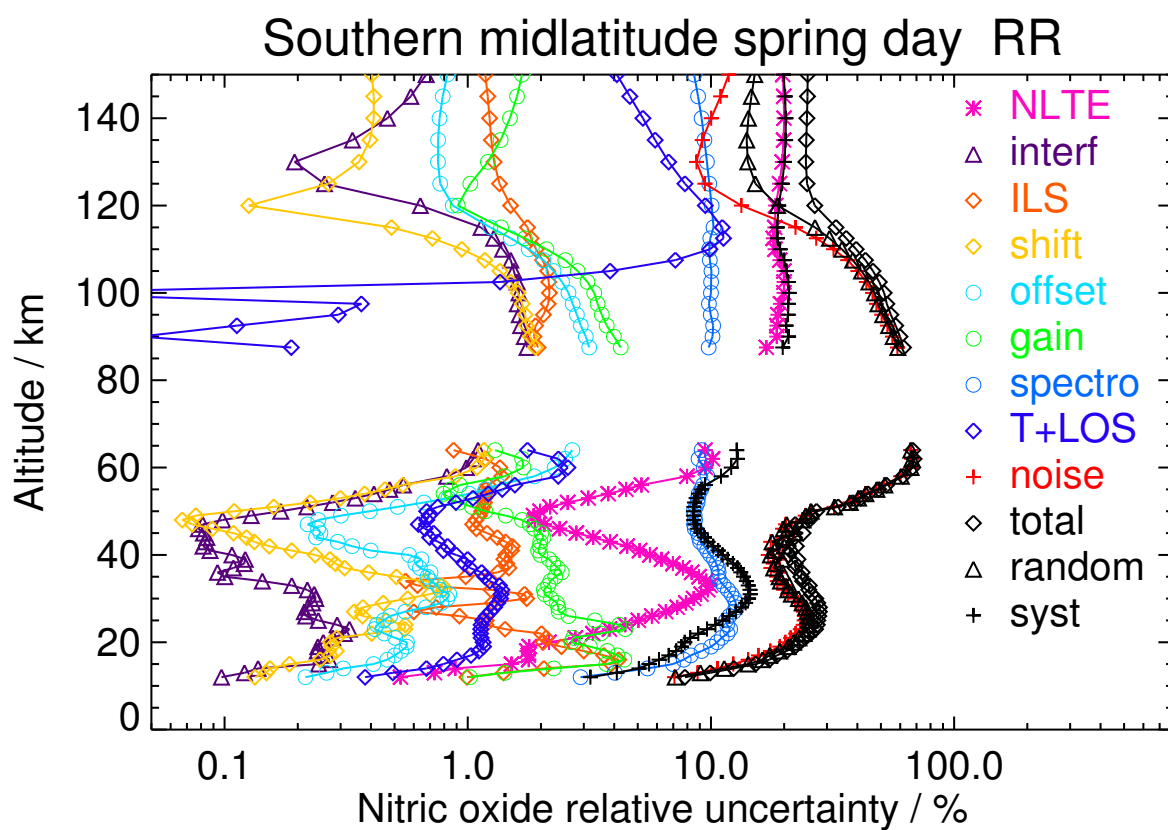

**Figure S55.** V8R\_NO\_261 Southern midlatitude spring day

**Table S57.** Nitric oxide error budget for Southern midlatitude spring night. All uncertainties are  $1\sigma$ .

| altitude (km) | mean target (ppmv) | NLTE (%) | interf (%) | ILS (%) | shift (%) | offset (%) | gain (%) | spectro (%) | T+LOS (%) | noise (%) | random (%) | syst (%) | total (%) |
|---------------|--------------------|----------|------------|---------|-----------|------------|----------|-------------|-----------|-----------|------------|----------|-----------|
| 60            | 0.00               | 8.16     | 2.88       | 1.11    | 1.95      | 2.77       | 5.23     | 15.78       | 3.99      | 92.42     | 93.60      | 12.69    | 94.46     |
| 90            | 0.13               | 7.11     | 1.07       | 1.91    | 1.11      | 2.12       | 4.14     | 8.71        | 0.30      | 44.37     | 44.54      | 11.79    | 46.08     |
| 100           | 2.12               | 12.29    | 1.14       | 2.20    | 1.23      | 1.94       | 3.64     | 11.87       | 0.75      | 35.61     | 36.41      | 16.11    | 39.82     |
| 110           | 6.99               | 13.45    | 0.75       | 2.08    | 0.50      | 0.98       | 3.30     | 10.46       | 10.07     | 23.00     | 27.39      | 13.70    | 30.62     |
| 120           | 14.92              | 14.53    | 0.41       | 1.69    | 0.46      | 0.69       | 1.64     | 8.79        | 8.45      | 19.13     | 23.14      | 14.02    | 27.06     |
| 130           | 21.44              | 14.11    | 0.69       | 1.50    | 0.64      | 0.84       | 1.53     | 7.90        | 7.16      | 18.77     | 22.29      | 13.20    | 25.91     |
| 140           | 28.67              | 13.67    | 0.80       | 1.43    | 0.66      | 0.86       | 1.69     | 7.45        | 6.28      | 18.37     | 21.68      | 12.49    | 25.02     |
| 150           | 34.29              | 13.00    | 0.85       | 1.36    | 0.64      | 0.83       | 1.78     | 6.98        | 5.36      | 17.29     | 20.45      | 11.58    | 23.50     |

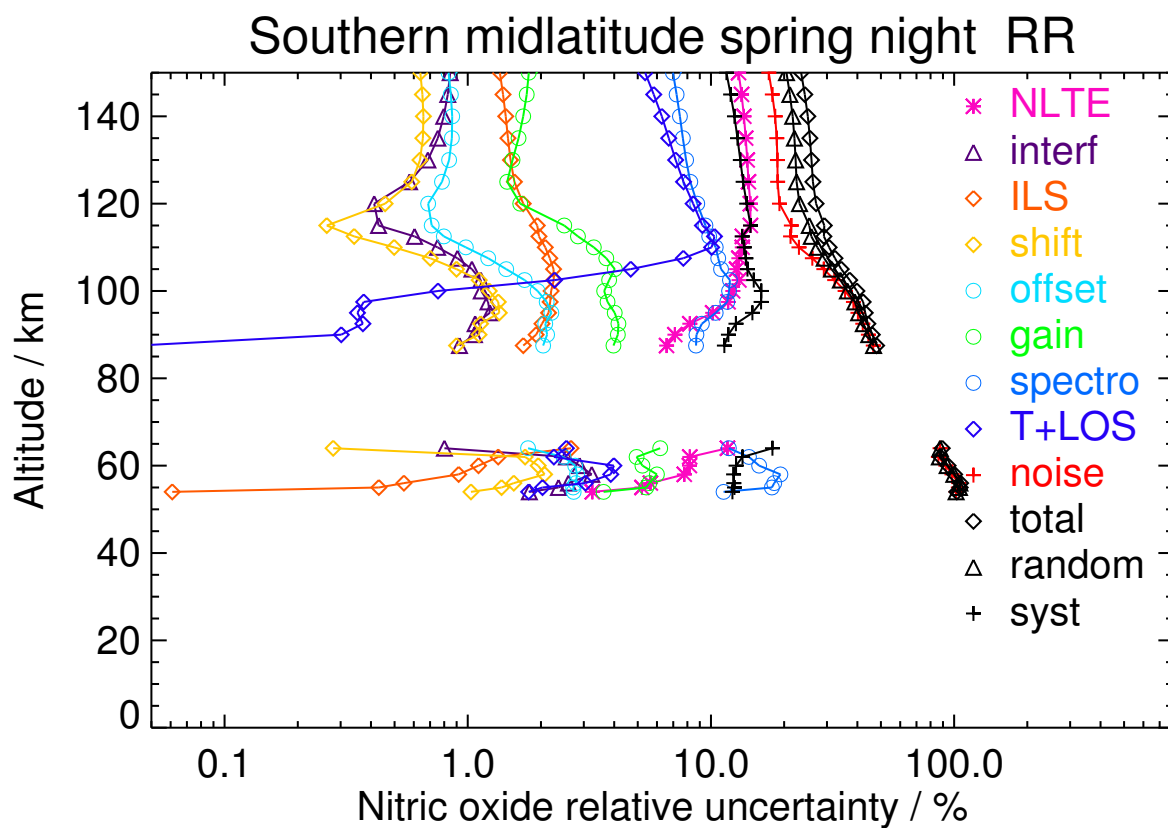

**Figure S56.** V8R\_NO\_261 Southern midlatitude spring night

**Table S58.** Nitric oxide error budget for Southern midlatitude summer day. All uncertainties are  $1\sigma$ .

| altitude (km) | mean target (ppmv) | NLTE (%) | interf (%) | ILS (%) | shift (%) | offset (%) | gain (%) | spectro (%) | T+LOS (%) | noise (%) | random (%) | syst (%) | total (%) |
|---------------|--------------------|----------|------------|---------|-----------|------------|----------|-------------|-----------|-----------|------------|----------|-----------|
| 20            | 0.00               | 2.56     | 0.29       | 2.54    | 0.40      | 0.53       | 7.58     | 10.92       | 2.20      | 22.18     | 23.07      | 12.44    | 26.21     |
| 30            | 0.01               | 7.83     | 0.23       | 2.02    | 0.47      | 0.76       | 1.72     | 10.88       | 1.75      | 20.54     | 20.99      | 13.12    | 24.75     |
| 40            | 0.01               | 3.25     | 0.10       | 1.16    | 0.29      | 0.45       | 2.16     | 8.76        | 0.92      | 11.82     | 12.06      | 9.42     | 15.30     |
| 50            | 0.01               | 1.29     | 0.11       | 1.27    | 0.08      | 0.21       | 1.49     | 8.38        | 0.57      | 18.09     | 18.23      | 8.42     | 20.08     |
| 60            | 0.00               | 9.21     | 0.87       | 1.70    | 1.07      | 2.13       | 2.07     | 9.33        | 1.54      | 62.17     | 62.64      | 11.34    | 63.66     |
| 70            | 0.01               | 8.38     | 1.42       | 0.92    | 1.72      | 2.83       | 1.03     | 8.18        | 0.13      | 50.55     | 50.68      | 11.78    | 52.03     |
| 90            | 0.51               | 9.49     | 1.42       | 1.46    | 1.73      | 2.79       | 2.37     | 8.92        | 0.72      | 47.67     | 47.93      | 12.87    | 49.63     |
| 100           | 9.11               | 25.68    | 1.23       | 1.47    | 1.35      | 2.23       | 1.06     | 9.73        | 1.32      | 37.68     | 39.61      | 24.86    | 46.77     |
| 110           | 28.98              | 25.37    | 1.66       | 1.94    | 0.73      | 1.71       | 1.50     | 10.32       | 10.69     | 28.92     | 35.38      | 21.47    | 41.39     |
| 120           | 63.07              | 26.43    | 0.92       | 1.80    | 0.23      | 0.97       | 1.01     | 10.49       | 8.93      | 13.16     | 23.81      | 22.39    | 32.68     |
| 130           | 123.05             | 28.98    | 0.21       | 1.59    | 0.36      | 0.75       | 0.85     | 10.21       | 6.41      | 7.56      | 21.60      | 24.08    | 32.35     |
| 140           | 223.31             | 29.88    | 0.58       | 1.49    | 0.34      | 0.71       | 0.96     | 9.82        | 5.02      | 8.74      | 22.03      | 24.69    | 33.09     |
| 150           | 301.20             | 29.91    | 0.86       | 1.39    | 0.29      | 0.80       | 1.11     | 9.15        | 3.86      | 11.14     | 22.81      | 24.54    | 33.50     |

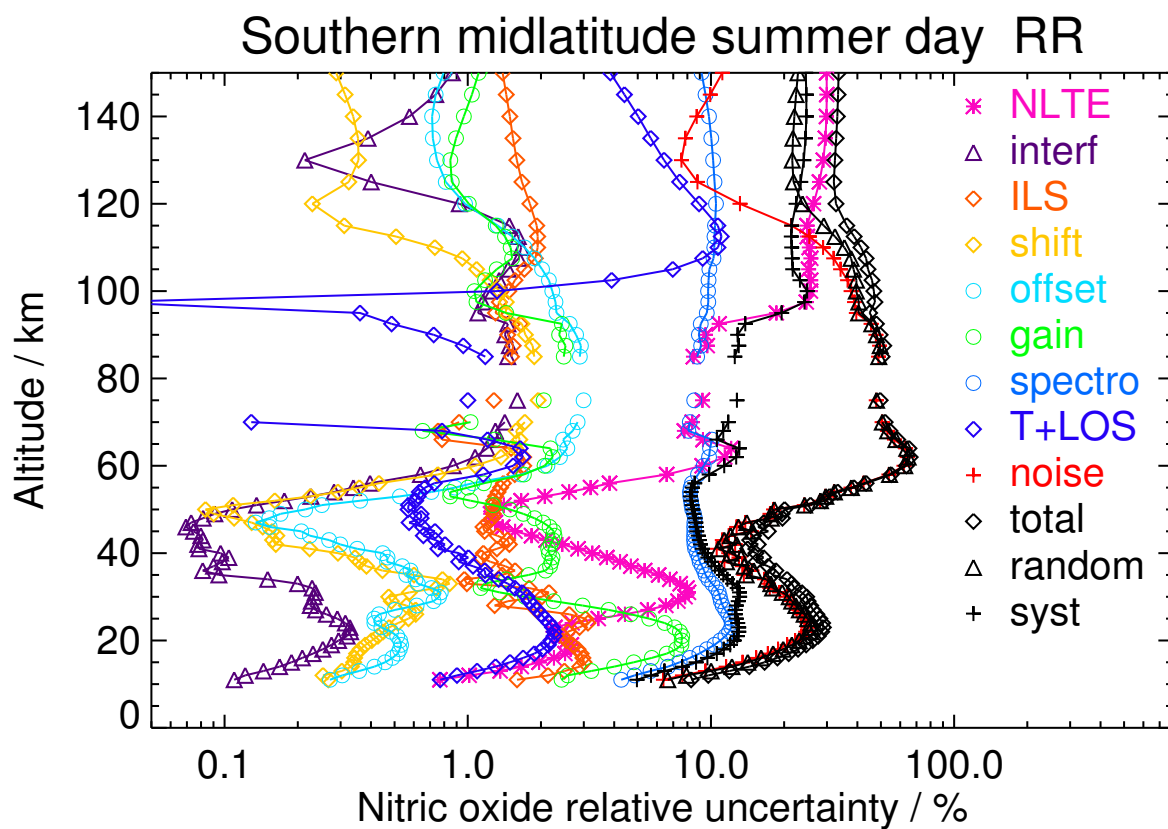

**Figure S57.** V8R\_NO\_261 Southern midlatitude summer day

**Table S59.** Nitric oxide error budget for Southern midlatitude summer night. All uncertainties are  $1\sigma$ .

| altitude (km) | mean target (ppmv) | NLTE (%) | interf (%) | ILS (%) | shift (%) | offset (%) | gain (%) | spectro (%) | T+LOS (%) | noise (%) | random (%) | syst (%) | total (%) |
|---------------|--------------------|----------|------------|---------|-----------|------------|----------|-------------|-----------|-----------|------------|----------|-----------|
| 30            | 0.00               | 1.39     | 0.50       | 1.86    | 0.57      | 0.59       | 2.04     | 3.53        | 0.94      | 31.80     | 32.00      | 3.30     | 32.17     |
| 40            | 0.00               | 0.83     | 0.26       | 0.81    | 0.25      | 0.46       | 2.03     | 2.31        | 0.54      | 18.82     | 19.06      | 1.46     | 19.12     |
| 50            | 0.00               | 1.44     | 0.23       | 0.76    | 0.13      | 0.46       | 1.89     | 11.02       | 0.48      | 25.71     | 27.41      | 6.15     | 28.09     |
| 60            | 0.00               | 6.42     | 1.42       | 1.47    | 1.12      | 2.53       | 3.64     | 10.32       | 1.97      | 80.07     | 80.55      | 10.01    | 81.17     |
| 100           | 3.59               | 11.48    | 1.93       | 1.41    | 1.87      | 2.09       | 2.50     | 7.56        | 3.46      | 37.87     | 38.53      | 13.07    | 40.68     |
| 110           | 9.70               | 16.43    | 1.37       | 1.59    | 0.87      | 1.17       | 2.55     | 8.52        | 7.53      | 24.85     | 27.20      | 17.03    | 32.09     |
| 120           | 21.81              | 17.51    | 0.49       | 1.32    | 0.42      | 0.97       | 2.85     | 7.77        | 7.42      | 17.97     | 21.53      | 17.10    | 27.50     |
| 130           | 30.69              | 18.10    | 0.80       | 1.24    | 0.69      | 1.04       | 4.77     | 8.19        | 6.44      | 17.37     | 22.09      | 16.61    | 27.64     |
| 140           | 42.39              | 18.39    | 1.14       | 1.19    | 0.77      | 1.06       | 5.70     | 8.66        | 5.70      | 17.53     | 23.12      | 15.98    | 28.10     |
| 150           | 51.30              | 17.95    | 1.37       | 1.14    | 0.75      | 1.04       | 6.07     | 8.70        | 4.90      | 17.11     | 23.02      | 15.04    | 27.50     |

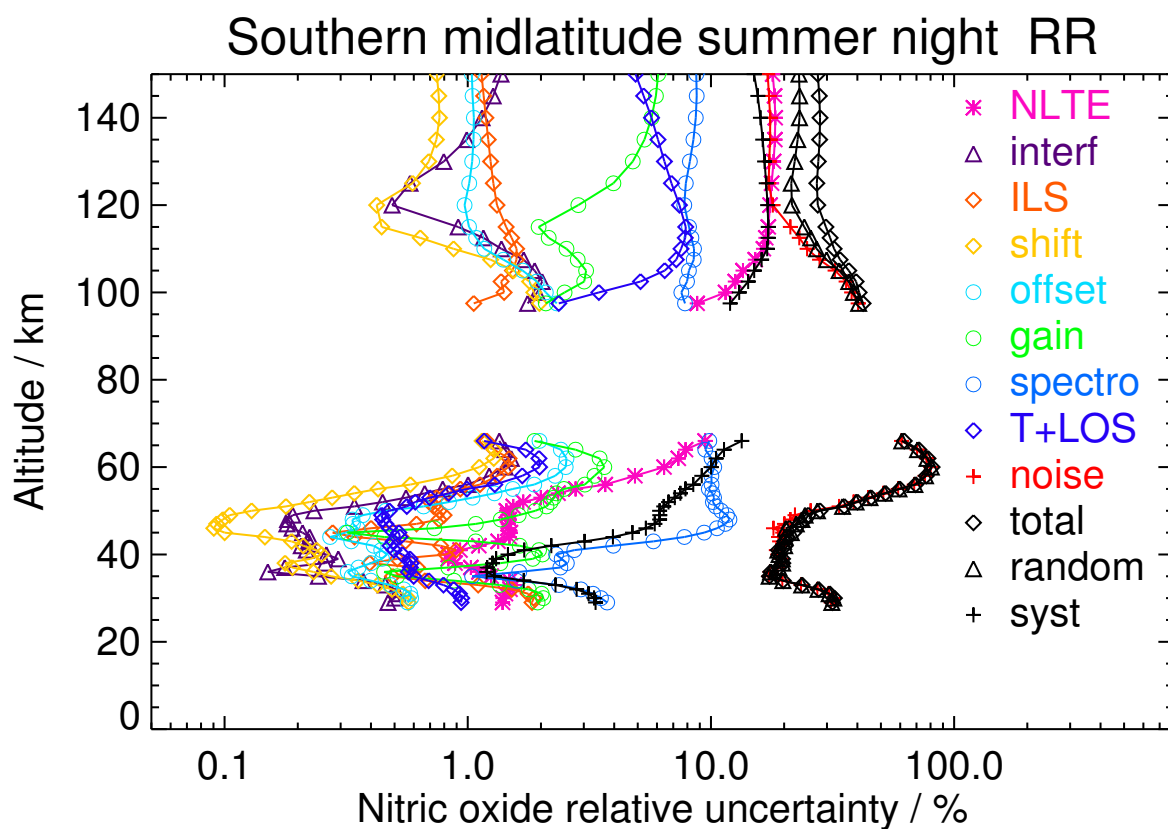

**Figure S58.** V8R\_NO\_261 Southern midlatitude summer night

**Table S60.** Nitric oxide error budget for Southern midlatitude autumn day. All uncertainties are  $1\sigma$ .

| altitude (km) | mean target (ppmv) | NLTE (%) | interf (%) | ILS (%) | shift (%) | offset (%) | gain (%) | spectro (%) | T+LOS (%) | noise (%) | random (%) | syst (%) | total (%) |
|---------------|--------------------|----------|------------|---------|-----------|------------|----------|-------------|-----------|-----------|------------|----------|-----------|
| 20            | 0.00               | 1.83     | 0.21       | 1.20    | 0.17      | 0.56       | 3.71     | 9.78        | 1.20      | 24.31     | 24.80      | 9.59     | 26.59     |
| 30            | 0.01               | 12.03    | 0.22       | 1.61    | 0.66      | 1.10       | 2.21     | 14.39       | 1.72      | 24.02     | 25.13      | 17.59    | 30.67     |
| 40            | 0.01               | 7.26     | 0.10       | 1.77    | 0.27      | 0.75       | 2.54     | 10.41       | 1.04      | 20.74     | 21.27      | 12.25    | 24.55     |
| 50            | 0.01               | 2.92     | 0.16       | 1.50    | 0.14      | 0.55       | 1.07     | 8.83        | 0.92      | 32.00     | 32.27      | 8.57     | 33.39     |
| 60            | 0.00               | 11.77    | 0.56       | 1.91    | 0.86      | 2.24       | 3.22     | 9.20        | 2.56      | 62.90     | 63.87      | 11.28    | 64.86     |
| 70            | 0.02               | 5.29     | 0.67       | 1.24    | 1.18      | 2.58       | 4.76     | 11.35       | 0.23      | 51.79     | 51.89      | 13.41    | 53.59     |
| 80            | 0.08               | 21.29    | 0.66       | 0.96    | 1.09      | 2.81       | 2.84     | 10.17       | 1.01      | 44.09     | 45.83      | 20.48    | 50.20     |
| 90            | 1.16               | 20.84    | 0.69       | 1.00    | 0.98      | 2.37       | 2.06     | 9.99        | 0.67      | 37.93     | 40.73      | 18.09    | 44.56     |
| 100           | 6.86               | 18.42    | 0.78       | 1.26    | 0.74      | 1.95       | 2.13     | 9.32        | 0.11      | 32.42     | 33.77      | 18.64    | 38.58     |
| 110           | 44.83              | 15.10    | 0.73       | 1.40    | 0.36      | 1.27       | 1.26     | 9.36        | 8.23      | 21.52     | 24.28      | 16.21    | 29.20     |
| 120           | 49.45              | 25.67    | 0.43       | 2.42    | 0.28      | 0.95       | 1.46     | 14.28       | 8.48      | 12.57     | 27.91      | 17.97    | 33.20     |
| 130           | 73.67              | 29.99    | 0.27       | 2.41    | 0.35      | 0.90       | 1.50     | 14.23       | 6.32      | 11.13     | 29.47      | 20.15    | 35.70     |
| 140           | 96.18              | 29.96    | 0.52       | 2.20    | 0.38      | 0.90       | 2.01     | 13.31       | 5.14      | 12.89     | 29.37      | 20.36    | 35.74     |
| 150           | 119.55             | 28.31    | 0.64       | 1.95    | 0.38      | 0.95       | 2.41     | 11.96       | 4.21      | 14.36     | 28.22      | 19.57    | 34.34     |

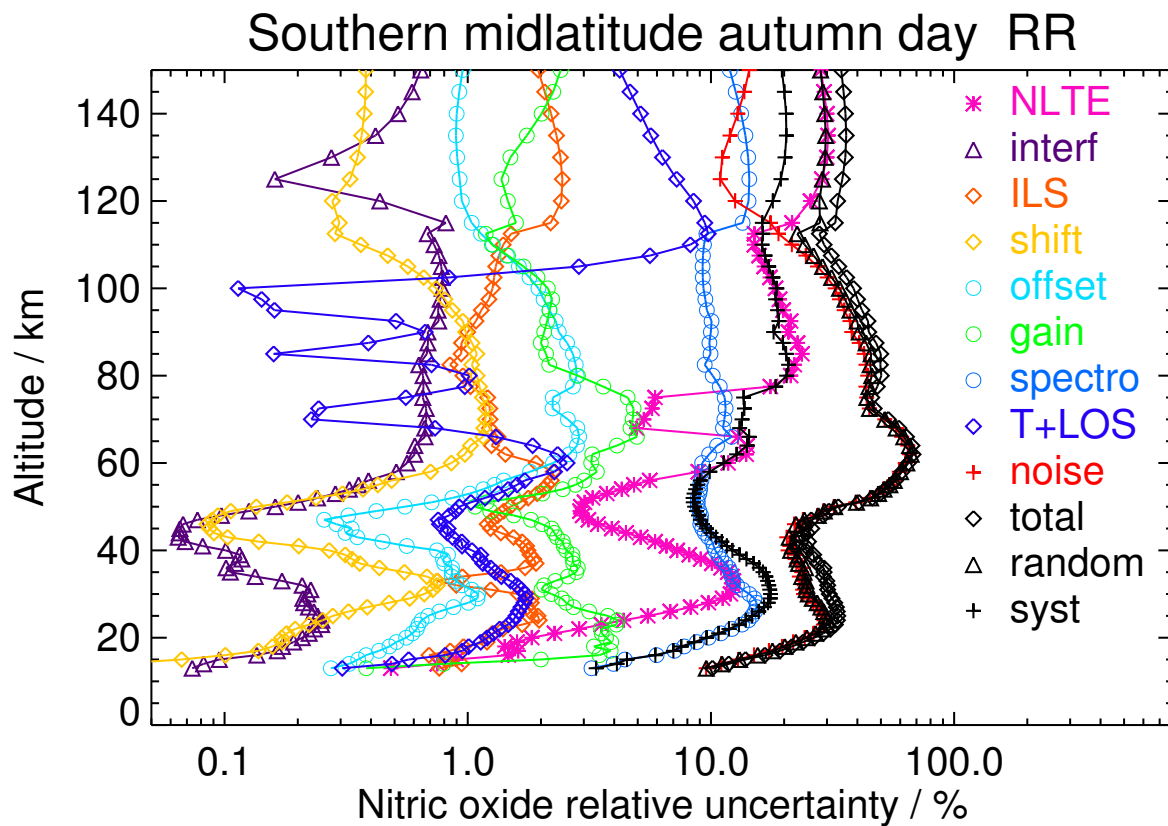

**Figure S59.** V8R\_NO\_261 Southern midlatitude autumn day

**Table S61.** Nitric oxide error budget for Southern midlatitude autumn night. All uncertainties are  $1\sigma$ .

| altitude (km) | mean target (ppmv) | NLTE (%) | interf (%) | ILS (%) | shift (%) | offset (%) | gain (%) | spectro (%) | T+LOS (%) | noise (%) | random (%) | syst (%) | total (%) |
|---------------|--------------------|----------|------------|---------|-----------|------------|----------|-------------|-----------|-----------|------------|----------|-----------|
| 60            | 0.01               | 12.78    | 0.74       | 1.62    | 0.99      | 3.00       | 4.91     | 11.75       | 2.88      | 85.58     | 86.60      | 13.03    | 87.58     |
| 80            | 0.09               | 32.54    | 1.34       | 0.58    | 1.82      | 3.14       | 2.74     | 15.74       | 0.56      | 57.91     | 65.36      | 20.30    | 68.44     |
| 90            | 2.00               | 28.56    | 1.00       | 1.19    | 1.38      | 2.44       | 5.10     | 18.94       | 1.43      | 44.04     | 51.98      | 21.21    | 56.14     |
| 100           | 10.68              | 25.55    | 0.86       | 1.68    | 0.90      | 1.66       | 3.68     | 18.31       | 0.74      | 31.66     | 39.00      | 22.15    | 44.86     |
| 110           | 16.11              | 27.27    | 0.90       | 2.00    | 0.53      | 1.26       | 1.20     | 17.56       | 7.49      | 23.38     | 38.36      | 13.84    | 40.78     |
| 120           | 23.88              | 33.76    | 0.37       | 2.27    | 0.37      | 0.76       | 2.65     | 17.33       | 7.29      | 15.23     | 37.98      | 17.19    | 41.69     |
| 130           | 32.28              | 37.12    | 0.39       | 2.37    | 0.51      | 0.87       | 4.02     | 17.65       | 5.79      | 14.94     | 40.42      | 18.32    | 44.38     |
| 140           | 38.34              | 38.97    | 0.62       | 2.49    | 0.54      | 0.89       | 4.57     | 18.11       | 4.96      | 15.80     | 42.36      | 18.85    | 46.36     |
| 150           | 44.34              | 36.67    | 0.72       | 2.35    | 0.51      | 0.89       | 4.51     | 16.85       | 4.23      | 15.94     | 39.85      | 18.42    | 43.91     |

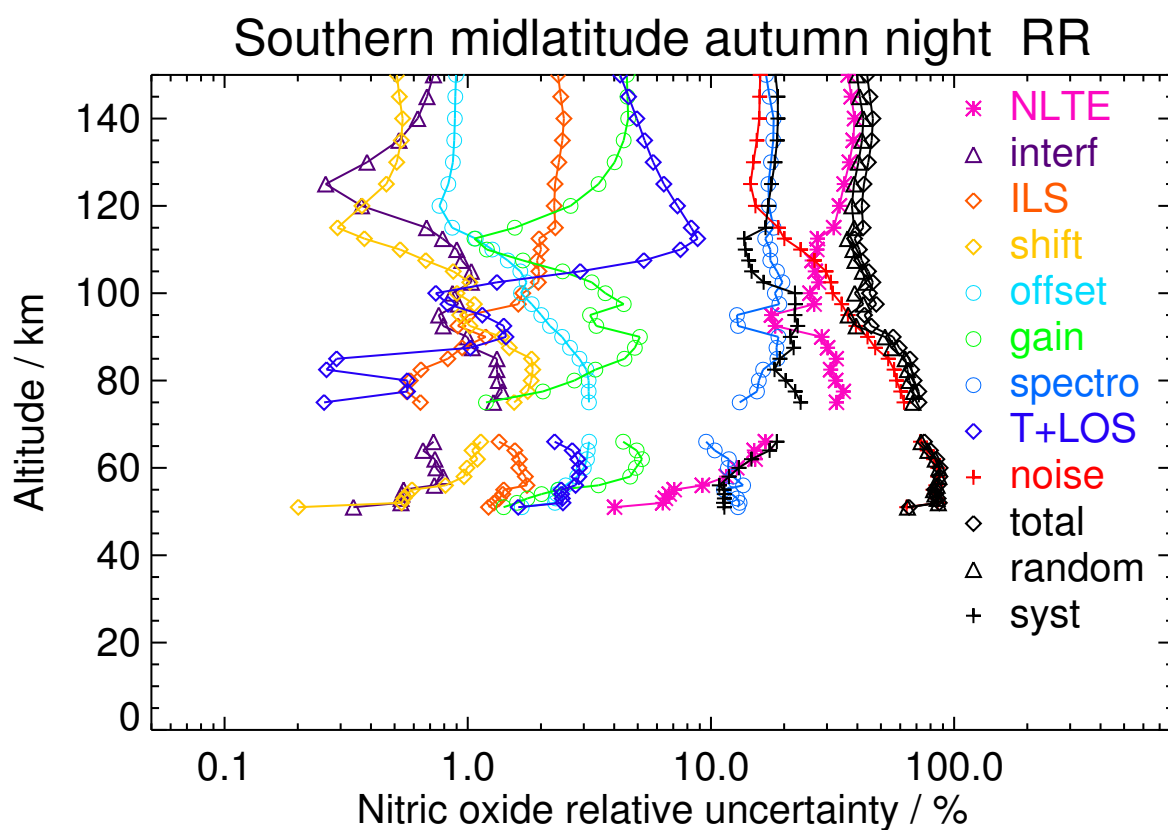

**Figure S60.** V8R\_NO\_261 Southern midlatitude autumn night



**Table S62.** Nitric oxide error budget for Southern polar winter day. All uncertainties are  $1\sigma$ .

| altitude (km) | mean target (ppmv) | NLTE (%) | interf (%) | ILS (%) | shift (%) | offset (%) | gain (%) | spectro (%) | T+LOS (%) | noise (%) | random (%) | syst (%) | total (%) |
|---------------|--------------------|----------|------------|---------|-----------|------------|----------|-------------|-----------|-----------|------------|----------|-----------|
| 30            | 0.00               | 9.88     | 0.39       | 2.06    | 0.79      | 1.78       | 2.22     | 12.09       | 1.60      | 42.06     | 43.59      | 11.32    | 45.04     |
| 40            | 0.00               | 5.51     | 0.20       | 1.28    | 0.32      | 0.98       | 1.37     | 9.32        | 1.18      | 30.51     | 31.02      | 9.60     | 32.47     |
| 50            | 0.00               | 2.89     | 0.21       | 1.23    | 0.08      | 0.65       | 1.20     | 8.65        | 1.17      | 35.23     | 35.55      | 8.11     | 36.46     |
| 60            | 0.01               | 8.16     | 0.64       | 1.08    | 0.34      | 2.25       | 1.18     | 9.90        | 2.68      | 64.14     | 64.81      | 9.68     | 65.52     |
| 70            | 0.04               | 14.58    | 0.80       | 1.18    | 0.53      | 2.66       | 2.15     | 10.80       | 0.06      | 51.20     | 52.87      | 13.02    | 54.45     |
| 80            | 0.22               | 17.05    | 0.84       | 1.73    | 0.70      | 2.60       | 1.78     | 11.10       | 1.12      | 44.39     | 46.77      | 14.59    | 48.99     |
| 90            | 2.41               | 13.68    | 0.65       | 1.45    | 0.63      | 1.81       | 1.16     | 10.26       | 0.10      | 29.18     | 31.27      | 13.19    | 33.94     |
| 100           | 11.60              | 13.30    | 0.66       | 1.38    | 0.64      | 1.77       | 1.20     | 9.83        | 0.37      | 30.48     | 32.06      | 13.52    | 34.79     |
| 110           | 63.82              | 12.65    | 0.62       | 1.04    | 0.20      | 1.00       | 0.82     | 9.48        | 6.41      | 18.40     | 21.47      | 13.11    | 25.16     |
| 120           | 126.06             | 18.33    | 0.34       | 1.42    | 0.26      | 1.02       | 1.83     | 9.24        | 7.01      | 11.85     | 20.42      | 14.15    | 24.85     |
| 130           | 141.45             | 22.05    | 0.37       | 1.51    | 0.28      | 1.04       | 1.30     | 9.72        | 5.26      | 13.50     | 22.50      | 17.02    | 28.21     |
| 140           | 148.12             | 22.44    | 0.63       | 1.51    | 0.26      | 1.03       | 1.19     | 9.13        | 4.16      | 15.23     | 23.27      | 17.31    | 29.00     |
| 150           | 162.63             | 22.01    | 0.77       | 1.48    | 0.24      | 1.08       | 1.18     | 8.28        | 3.32      | 16.24     | 23.54      | 16.71    | 28.87     |

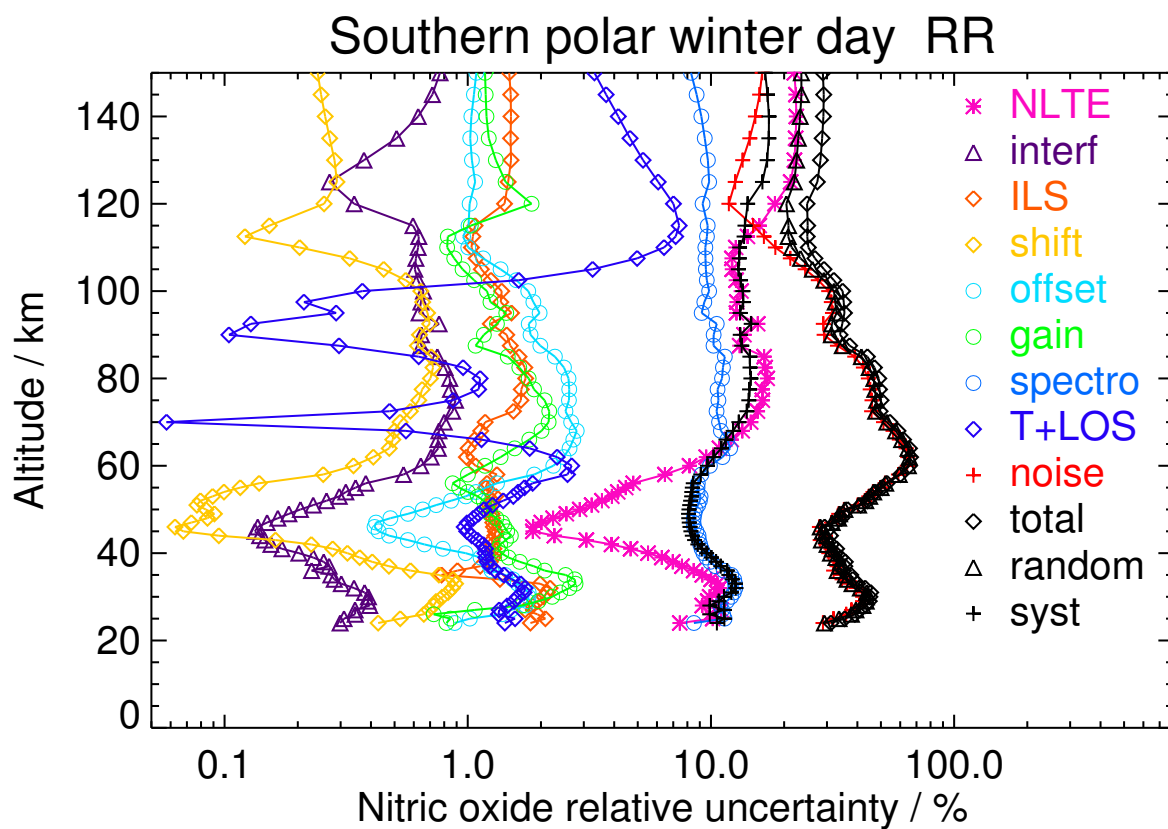

**Figure S61.** V8R\_NO\_261 Southern polar winter day

**Table S63.** Nitric oxide error budget for Southern polar winter night. All uncertainties are  $1\sigma$ .

| altitude (km) | mean target (ppmv) | NLTE (%) | interf (%) | ILS (%) | shift (%) | offset (%) | gain (%) | spectro (%) | T+LOS (%) | noise (%) | random (%) | syst (%) | total (%) |
|---------------|--------------------|----------|------------|---------|-----------|------------|----------|-------------|-----------|-----------|------------|----------|-----------|
| 50            | 0.00               | 6.56     | 0.47       | 0.53    | 0.15      | 1.90       | 1.67     | 9.56        | 1.30      | 69.52     | 69.78      | 10.28    | 70.54     |
| 60            | 0.00               | 11.33    | 1.61       | 1.08    | 0.78      | 3.28       | 1.90     | 11.91       | 5.14      | 95.53     | 96.29      | 13.05    | 97.17     |
| 70            | 0.05               | 4.66     | 0.77       | 0.39    | 0.39      | 1.82       | 0.68     | 12.46       | 3.96      | 54.96     | 55.67      | 10.91    | 56.73     |
| 80            | 0.24               | 5.74     | 0.53       | 0.83    | 0.35      | 2.10       | 0.83     | 12.35       | 1.68      | 41.09     | 41.97      | 11.03    | 43.40     |
| 90            | 1.69               | 5.80     | 0.22       | 0.27    | 0.17      | 1.38       | 0.85     | 9.59        | 3.30      | 23.30     | 23.61      | 11.17    | 26.12     |
| 100           | 11.80              | 8.65     | 0.75       | 0.51    | 0.50      | 1.82       | 1.15     | 9.23        | 2.63      | 31.32     | 31.89      | 11.67    | 33.96     |
| 110           | 39.19              | 17.62    | 1.01       | 1.37    | 0.36      | 1.35       | 1.20     | 9.07        | 7.20      | 25.47     | 28.91      | 16.25    | 33.16     |
| 120           | 61.52              | 22.01    | 0.28       | 1.76    | 0.17      | 0.77       | 1.07     | 10.78       | 7.63      | 13.38     | 23.47      | 17.10    | 29.04     |
| 130           | 81.11              | 25.38    | 0.42       | 1.92    | 0.28      | 0.79       | 1.38     | 11.39       | 5.89      | 13.04     | 25.77      | 17.91    | 31.38     |
| 140           | 92.83              | 26.32    | 0.64       | 1.95    | 0.28      | 0.85       | 1.35     | 11.28       | 4.93      | 14.52     | 27.26      | 17.86    | 32.59     |
| 150           | 117.48             | 23.80    | 0.72       | 1.74    | 0.24      | 0.89       | 1.18     | 9.87        | 4.07      | 15.07     | 24.69      | 17.43    | 30.22     |

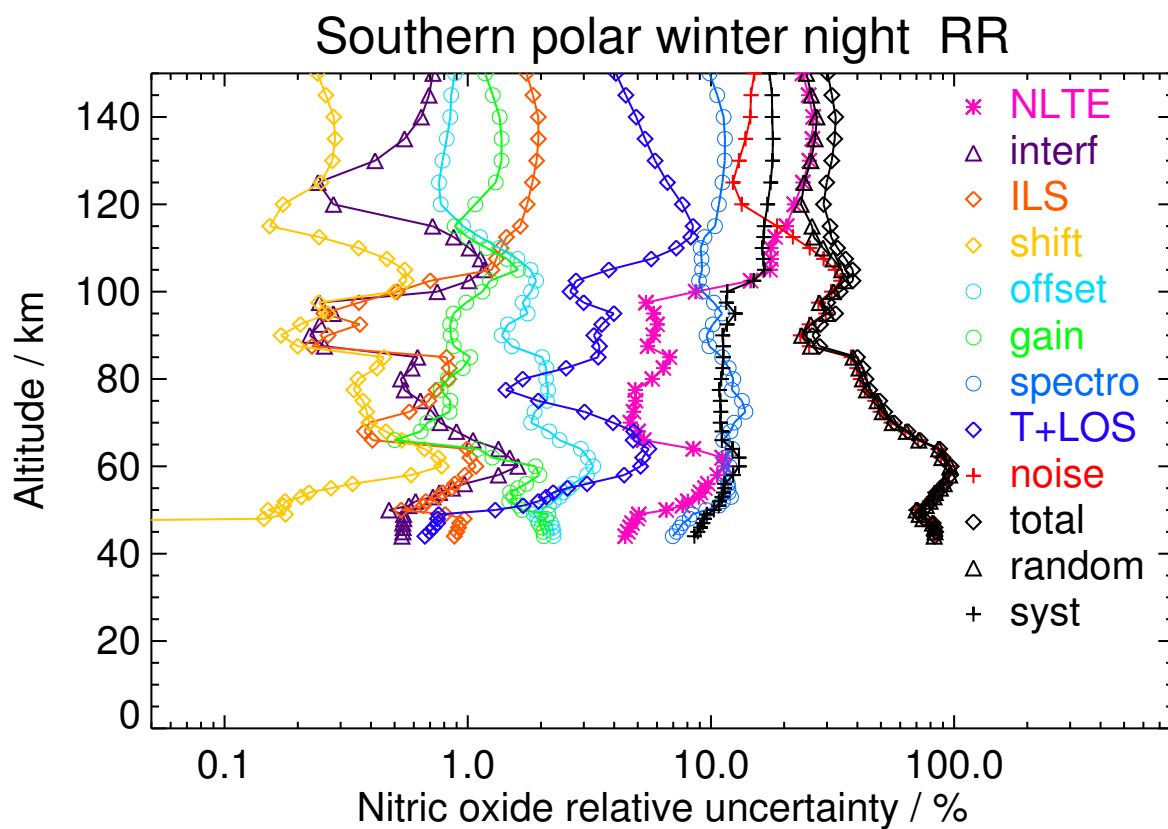

**Figure S62.** V8R\_NO\_261 Southern polar winter night

**Table S64.** Nitric oxide error budget for Southern polar spring day. All uncertainties are  $1\sigma$ .

| altitude (km) | mean target (ppmv) | NLTE (%) | interf (%) | ILS (%) | shift (%) | offset (%) | gain (%) | spectro (%) | T+LOS (%) | noise (%) | random (%) | syst (%) | total (%) |
|---------------|--------------------|----------|------------|---------|-----------|------------|----------|-------------|-----------|-----------|------------|----------|-----------|
| 20            | 0.00               | 2.47     | 0.26       | 1.85    | 0.22      | 0.51       | 2.67     | 10.95       | 1.08      | 17.39     | 19.21      | 8.45     | 20.99     |
| 30            | 0.00               | 5.08     | 0.09       | 1.95    | 0.42      | 0.61       | 2.01     | 10.54       | 1.23      | 17.31     | 18.21      | 10.71    | 21.13     |
| 40            | 0.01               | 3.39     | 0.09       | 1.24    | 0.19      | 0.33       | 1.92     | 9.46        | 0.81      | 14.06     | 14.57      | 9.62     | 17.46     |
| 50            | 0.01               | 1.47     | 0.14       | 1.09    | 0.07      | 0.27       | 1.36     | 8.36        | 0.61      | 24.02     | 24.14      | 8.35     | 25.54     |
| 60            | 0.01               | 9.67     | 1.04       | 1.50    | 1.42      | 2.02       | 1.92     | 10.26       | 2.51      | 62.45     | 63.22      | 11.00    | 64.17     |
| 90            | 0.62               | 13.43    | 1.55       | 1.75    | 2.33      | 2.65       | 4.85     | 9.40        | 0.44      | 50.13     | 50.41      | 16.78    | 53.13     |
| 100           | 7.12               | 13.67    | 1.50       | 1.93    | 1.97      | 2.21       | 4.38     | 9.43        | 1.51      | 41.75     | 42.30      | 16.29    | 45.33     |
| 110           | 32.20              | 16.29    | 1.27       | 1.96    | 1.02      | 1.47       | 2.88     | 9.19        | 9.71      | 27.69     | 30.08      | 17.97    | 35.04     |
| 120           | 53.73              | 20.28    | 0.49       | 1.47    | 0.25      | 0.86       | 0.88     | 8.88        | 7.86      | 12.51     | 16.52      | 20.96    | 26.69     |
| 130           | 85.66              | 21.72    | 0.34       | 0.96    | 0.59      | 0.78       | 1.69     | 8.52        | 5.47      | 9.70      | 13.73      | 22.01    | 25.94     |
| 140           | 133.52             | 21.89    | 0.62       | 0.81    | 0.67      | 0.81       | 2.29     | 8.17        | 4.31      | 11.15     | 14.71      | 21.91    | 26.39     |
| 150           | 178.52             | 21.30    | 0.81       | 0.72    | 0.66      | 0.88       | 2.61     | 7.63        | 3.41      | 12.67     | 15.75      | 21.10    | 26.33     |

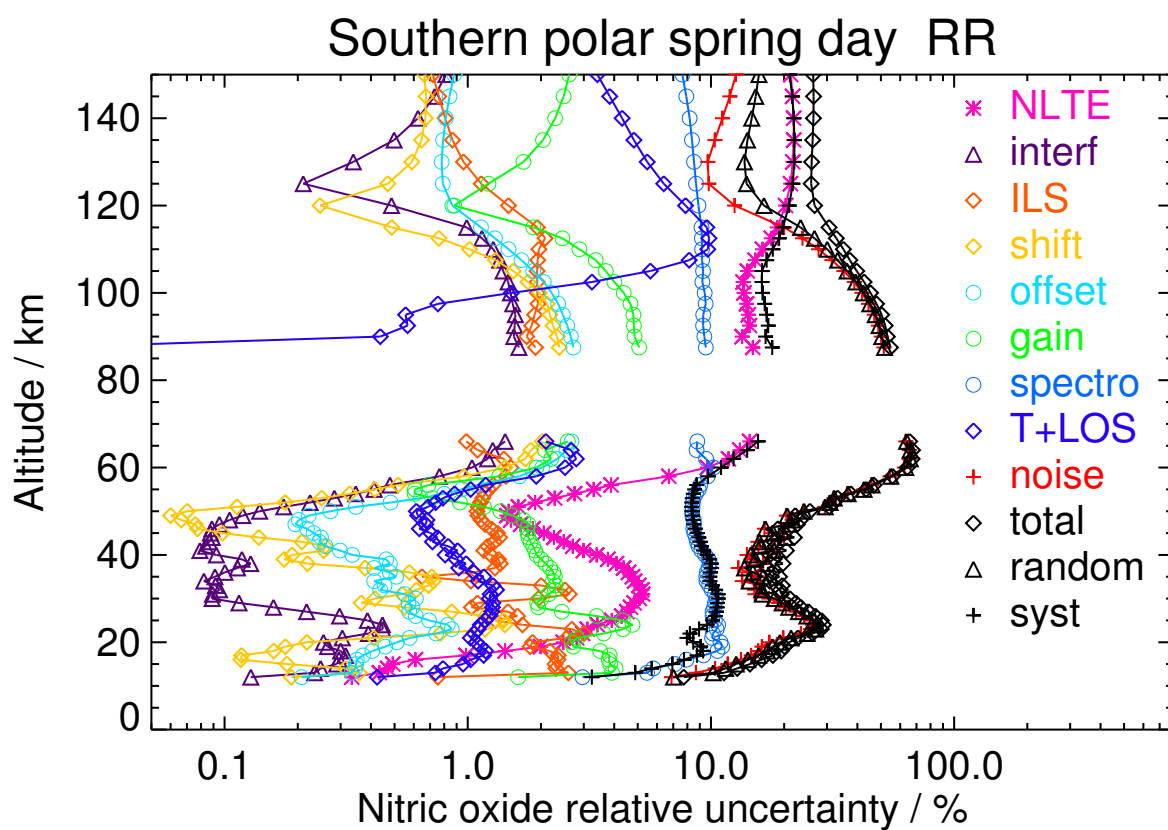

**Figure S63.** V8R\_NO\_261 Southern polar spring day

**Table S65.** Nitric oxide error budget for Southern polar spring night. All uncertainties are  $1\sigma$ .

| altitude (km) | mean target (ppmv) | NLTE (%) | interf (%) | ILS (%) | shift (%) | offset (%) | gain (%) | spectro (%) | T+LOS (%) | noise (%) | random (%) | syst (%) | total (%) |
|---------------|--------------------|----------|------------|---------|-----------|------------|----------|-------------|-----------|-----------|------------|----------|-----------|
| 30            | 0.00               | 2.57     | 0.41       | 3.56    | 0.53      | 0.87       | 5.60     | 4.37        | 1.02      | 26.69     | 27.59      | 4.82     | 28.01     |
| 40            | 0.00               | 3.57     | 0.28       | 0.78    | 0.16      | 0.64       | 2.77     | 3.84        | 0.64      | 22.30     | 22.91      | 3.04     | 23.11     |
| 50            | 0.00               | 3.86     | 0.32       | 1.02    | 0.20      | 0.56       | 1.32     | 10.66       | 0.69      | 31.47     | 32.70      | 7.26     | 33.50     |
| 60            | 0.00               | 10.56    | 1.49       | 2.52    | 1.55      | 2.41       | 2.96     | 16.24       | 2.28      | 70.59     | 72.38      | 12.23    | 73.41     |
| 70            | 0.06               | 11.24    | 1.52       | 2.65    | 1.75      | 2.76       | 1.79     | 9.21        | 0.30      | 50.98     | 51.11      | 14.88    | 53.23     |
| 80            | 0.10               | 10.57    | 1.80       | 0.45    | 1.97      | 2.83       | 3.02     | 10.00       | 0.38      | 48.70     | 48.87      | 14.85    | 51.07     |
| 90            | 0.51               | 9.96     | 1.88       | 2.16    | 2.77      | 2.68       | 5.99     | 11.09       | 0.38      | 49.13     | 49.34      | 16.16    | 51.91     |
| 100           | 8.49               | 14.89    | 1.88       | 2.24    | 2.28      | 2.13       | 5.81     | 11.72       | 0.62      | 40.39     | 41.65      | 17.56    | 45.20     |
| 110           | 33.88              | 39.12    | 1.64       | 1.94    | 1.42      | 1.55       | 4.03     | 8.76        | 8.79      | 28.49     | 43.30      | 25.46    | 50.23     |
| 120           | 71.62              | 45.23    | 1.34       | 1.84    | 0.35      | 0.91       | 2.18     | 10.42       | 7.64      | 13.61     | 43.14      | 23.40    | 49.08     |
| 130           | 142.85             | 48.97    | 0.49       | 2.24    | 0.57      | 0.73       | 1.73     | 14.63       | 5.42      | 7.95      | 46.09      | 24.28    | 52.09     |
| 140           | 232.24             | 51.31    | 0.71       | 2.99    | 0.53      | 0.58       | 2.12     | 17.56       | 3.98      | 8.13      | 48.90      | 25.42    | 55.12     |
| 150           | 286.90             | 69.20    | 1.33       | 3.50    | 0.39      | 0.82       | 2.54     | 18.42       | 2.84      | 11.13     | 66.44      | 29.44    | 72.68     |

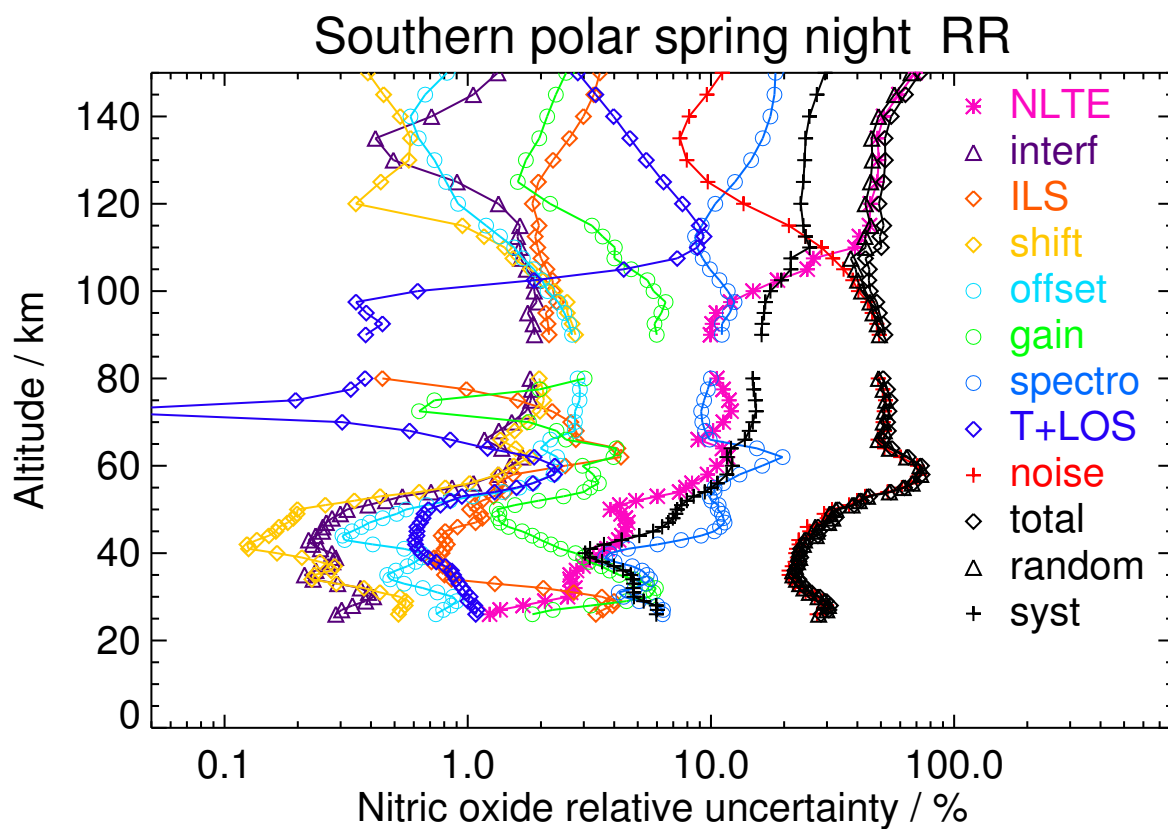

**Figure S64.** V8R\_NO\_261 Southern polar spring night

**Table S66.** Nitric oxide error budget for Southern polar summer day. All uncertainties are  $1\sigma$ .

| altitude (km) | mean target (ppmv) | NLTE (%) | interf (%) | ILS (%) | shift (%) | offset (%) | gain (%) | spectro (%) | T+LOS (%) | noise (%) | random (%) | syst (%) | total (%) |
|---------------|--------------------|----------|------------|---------|-----------|------------|----------|-------------|-----------|-----------|------------|----------|-----------|
| 10            | 0.00               | 0.23     | 0.08       | 0.91    | 0.24      | 0.23       | 1.88     | 3.38        | 0.80      | 5.41      | 5.50       | 3.95     | 6.77      |
| 20            | 0.00               | 1.06     | 0.20       | 1.21    | 0.14      | 0.28       | 3.36     | 12.84       | 1.71      | 17.79     | 18.31      | 12.76    | 22.32     |
| 30            | 0.01               | 3.64     | 0.19       | 2.03    | 0.40      | 0.66       | 1.18     | 9.40        | 1.65      | 17.34     | 17.69      | 9.91     | 20.28     |
| 40            | 0.01               | 2.19     | 0.06       | 1.25    | 0.21      | 0.41       | 2.61     | 9.00        | 0.81      | 9.59      | 9.83       | 9.51     | 13.68     |
| 50            | 0.01               | 1.12     | 0.09       | 1.14    | 0.09      | 0.17       | 1.91     | 8.32        | 0.50      | 17.73     | 17.83      | 8.50     | 19.75     |
| 60            | 0.01               | 4.25     | 0.69       | 1.19    | 0.87      | 1.75       | 1.25     | 8.80        | 1.28      | 57.03     | 57.25      | 8.91     | 57.94     |
| 100           | 10.59              | 15.11    | 1.16       | 2.11    | 1.53      | 1.87       | 2.71     | 7.91        | 5.11      | 32.99     | 34.61      | 15.05    | 37.74     |
| 110           | 22.45              | 19.13    | 1.41       | 2.43    | 0.86      | 1.38       | 2.24     | 9.80        | 9.37      | 24.39     | 28.90      | 18.02    | 34.06     |
| 120           | 42.06              | 21.58    | 0.34       | 1.56    | 0.51      | 0.88       | 1.90     | 10.03       | 8.04      | 12.85     | 19.63      | 20.44    | 28.34     |
| 130           | 69.34              | 22.62    | 0.55       | 1.16    | 0.80      | 1.01       | 3.12     | 9.79        | 6.59      | 13.36     | 19.88      | 21.15    | 29.03     |
| 140           | 116.63             | 22.57    | 0.83       | 1.01    | 0.83      | 1.10       | 3.27     | 9.29        | 5.72      | 15.01     | 20.80      | 20.86    | 29.46     |
| 150           | 159.85             | 21.62    | 0.97       | 0.88    | 0.80      | 1.15       | 3.22     | 8.56        | 4.88      | 15.98     | 20.95      | 19.88    | 28.88     |

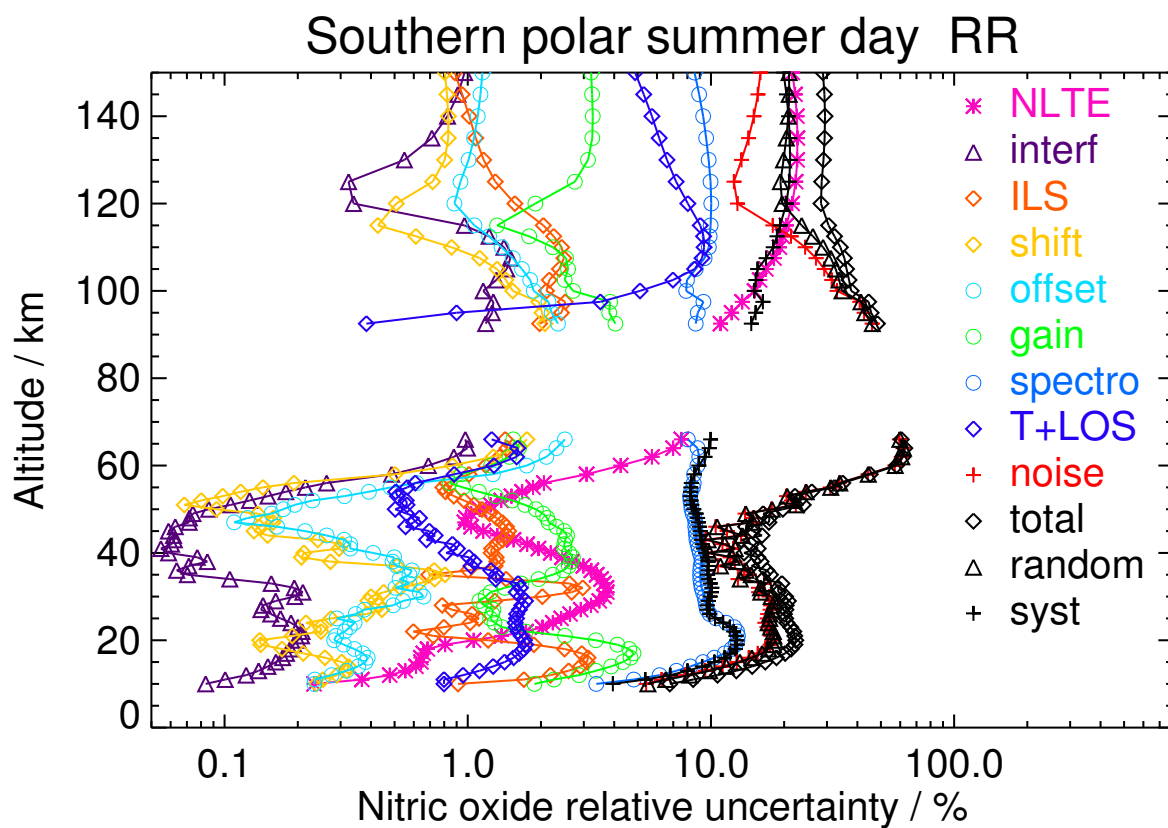

**Figure S65.** V8R\_NO\_261 Southern polar summer day

**Table S67.** Nitric oxide error budget for Southern polar summer night. All uncertainties are  $1\sigma$ .

| altitude (km) | mean target (ppmv) | NLTE (%) | interf (%) | ILS (%) | shift (%) | offset (%) | gain (%) | spectro (%) | T+LOS (%) | noise (%) | random (%) | syst (%) | total (%) |
|---------------|--------------------|----------|------------|---------|-----------|------------|----------|-------------|-----------|-----------|------------|----------|-----------|
| 30            | 0.00               | 0.70     | 0.61       | 3.68    | 0.35      | 0.72       | 2.53     | 5.35        | 1.22      | 32.29     | 32.54      | 5.96     | 33.08     |
| 40            | 0.00               | 1.02     | 0.20       | 0.77    | 0.15      | 0.53       | 2.13     | 2.85        | 0.49      | 19.90     | 20.20      | 1.65     | 20.27     |
| 50            | 0.00               | 1.23     | 0.17       | 0.66    | 0.09      | 0.36       | 1.19     | 9.03        | 0.49      | 24.20     | 25.17      | 6.13     | 25.90     |
| 60            | 0.00               | 4.17     | 0.97       | 0.94    | 0.89      | 1.94       | 2.26     | 8.71        | 1.85      | 66.54     | 66.81      | 8.46     | 67.34     |
| 100           | 3.62               | 14.94    | 1.80       | 2.57    | 2.39      | 2.07       | 4.00     | 10.37       | 4.21      | 37.29     | 40.25      | 12.46    | 42.13     |
| 110           | 10.71              | 18.38    | 1.36       | 2.14    | 1.02      | 1.30       | 2.15     | 11.55       | 9.61      | 27.04     | 33.22      | 14.32    | 36.18     |
| 120           | 17.31              | 20.83    | 0.36       | 1.45    | 0.66      | 1.27       | 3.69     | 10.69       | 7.64      | 21.84     | 28.90      | 16.31    | 33.19     |
| 130           | 25.48              | 21.41    | 0.84       | 1.31    | 0.99      | 1.42       | 4.53     | 10.17       | 6.48      | 22.25     | 29.23      | 16.44    | 33.54     |
| 140           | 37.31              | 21.09    | 1.07       | 1.28    | 1.03      | 1.41       | 4.79     | 9.81        | 5.75      | 22.00     | 28.83      | 15.99    | 32.97     |
| 150           | 47.93              | 19.55    | 1.16       | 1.22    | 0.97      | 1.35       | 4.70     | 9.03        | 4.99      | 21.04     | 27.10      | 14.99    | 30.97     |

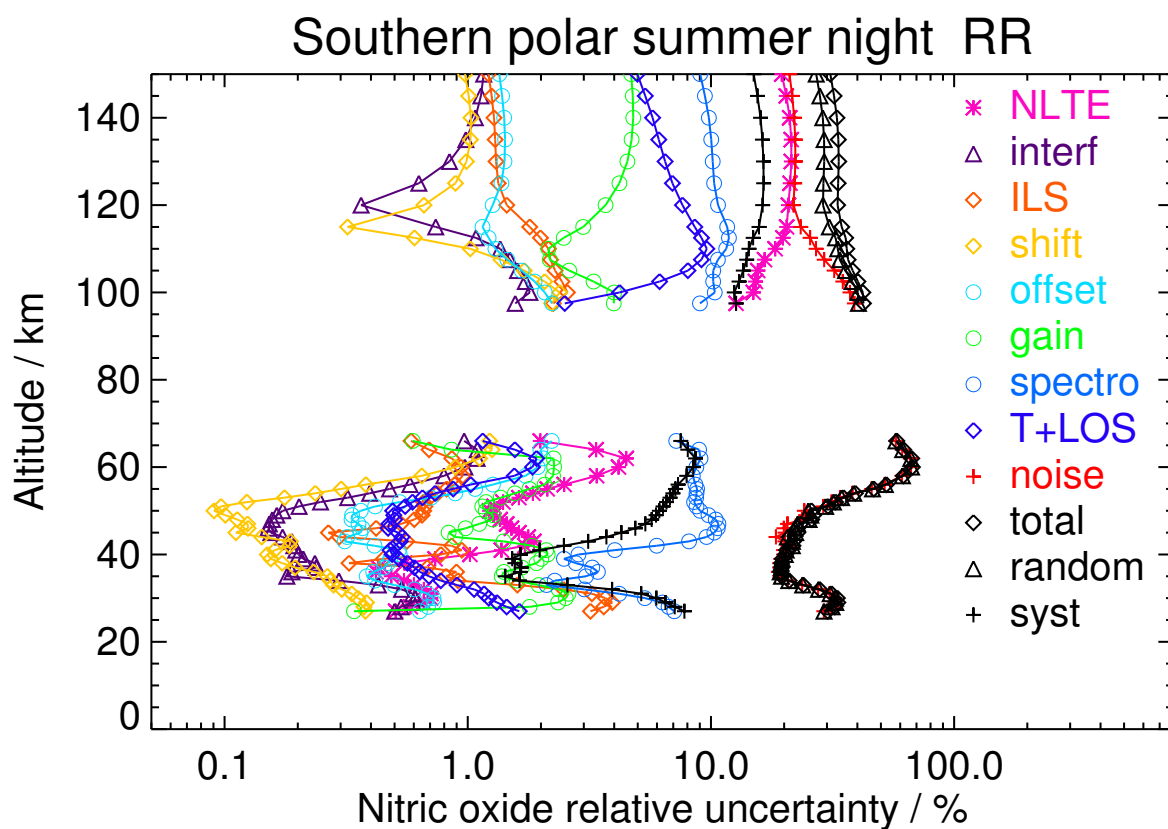

**Figure S66.** V8R\_NO\_261 Southern polar summer night

**Table S68.** Nitric oxide error budget for Southern polar autumn day. All uncertainties are  $1\sigma$ .

| altitude (km) | mean target (ppmv) | NLTE (%) | interf (%) | ILS (%) | shift (%) | offset (%) | gain (%) | spectro (%) | T+LOS (%) | noise (%) | random (%) | syst (%) | total (%) |
|---------------|--------------------|----------|------------|---------|-----------|------------|----------|-------------|-----------|-----------|------------|----------|-----------|
| 20            | 0.00               | 2.15     | 0.18       | 0.87    | 0.21      | 0.58       | 0.85     | 8.66        | 0.83      | 22.28     | 22.45      | 8.65     | 24.06     |
| 30            | 0.01               | 8.85     | 0.34       | 1.35    | 0.70      | 1.30       | 3.42     | 12.62       | 1.75      | 29.70     | 30.53      | 14.38    | 33.75     |
| 40            | 0.00               | 6.82     | 0.24       | 2.44    | 0.34      | 0.98       | 1.43     | 11.02       | 1.31      | 37.05     | 37.43      | 12.28    | 39.39     |
| 50            | 0.00               | 4.20     | 0.36       | 1.38    | 0.18      | 1.11       | 1.21     | 9.06        | 1.66      | 49.82     | 50.17      | 8.49     | 50.88     |
| 60            | 0.01               | 10.13    | 0.94       | 1.12    | 0.60      | 2.63       | 2.32     | 11.39       | 2.69      | 67.32     | 68.23      | 11.45    | 69.18     |
| 70            | 0.04               | 15.27    | 1.25       | 1.65    | 0.89      | 2.90       | 2.55     | 10.60       | 0.23      | 52.64     | 54.15      | 14.30    | 56.01     |
| 80            | 0.19               | 16.43    | 1.26       | 1.64    | 1.02      | 2.89       | 2.66     | 10.92       | 0.80      | 51.30     | 53.03      | 15.15    | 55.15     |
| 90            | 1.48               | 13.91    | 0.88       | 1.40    | 0.85      | 2.13       | 2.03     | 12.00       | 0.59      | 37.52     | 39.05      | 15.26    | 41.92     |
| 100           | 12.49              | 23.24    | 0.90       | 1.26    | 0.75      | 1.91       | 1.78     | 9.50        | 0.11      | 35.08     | 39.32      | 18.00    | 43.25     |
| 110           | 67.07              | 18.07    | 0.82       | 1.50    | 0.28      | 1.27       | 1.56     | 9.07        | 7.64      | 23.12     | 27.51      | 15.87    | 31.76     |
| 120           | 86.16              | 21.54    | 0.31       | 1.79    | 0.23      | 0.94       | 1.90     | 10.68       | 7.21      | 11.27     | 21.74      | 17.09    | 27.65     |
| 130           | 109.53             | 24.61    | 0.41       | 1.80    | 0.31      | 0.93       | 1.83     | 10.96       | 4.80      | 11.82     | 23.08      | 19.06    | 29.94     |
| 140           | 133.56             | 25.47    | 0.59       | 1.75    | 0.30      | 0.92       | 1.76     | 10.69       | 3.68      | 13.52     | 24.38      | 19.30    | 31.09     |
| 150           | 159.18             | 24.99    | 0.68       | 1.61    | 0.28      | 0.98       | 1.62     | 9.84        | 2.89      | 14.61     | 24.53      | 18.66    | 30.82     |

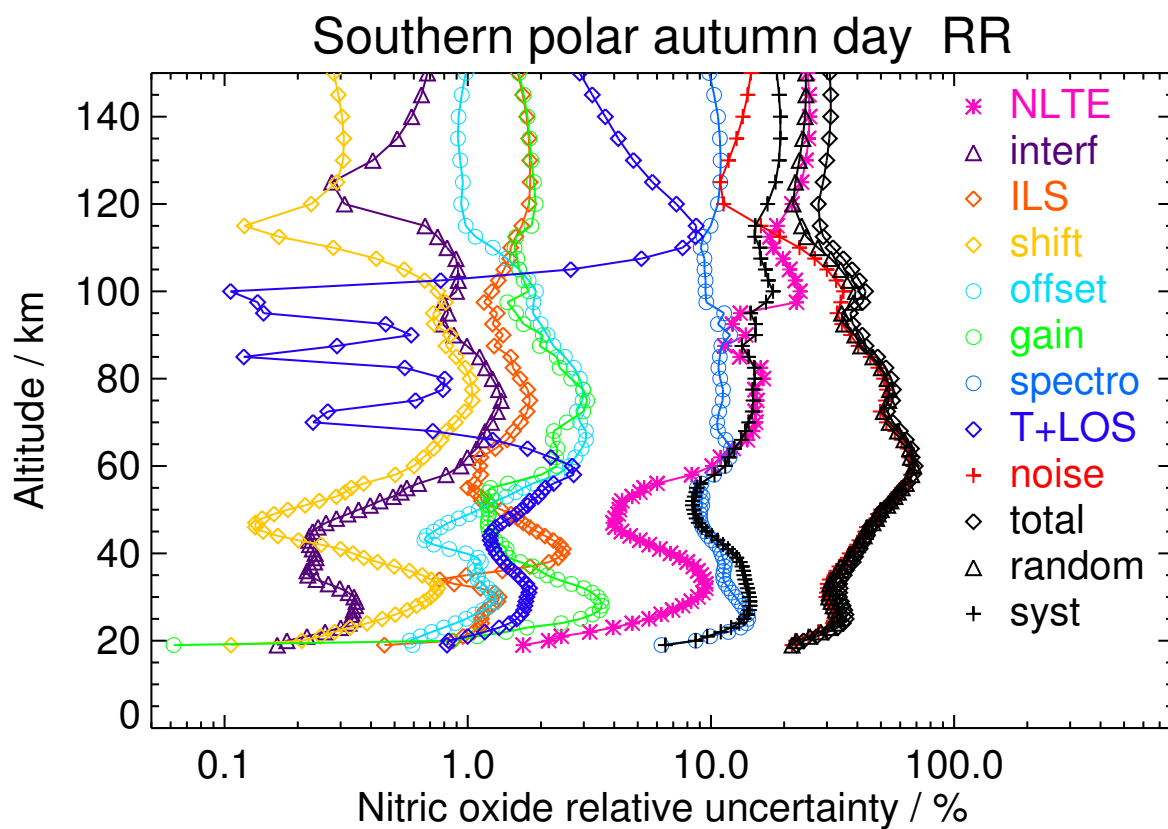

**Figure S67.** V8R\_NO\_261 Southern polar autumn day

**Table S69.** Nitric oxide error budget for Southern polar autumn night. All uncertainties are  $1\sigma$ .

| altitude (km) | mean target (ppmv) | NLTE (%) | interf (%) | ILS (%) | shift (%) | offset (%) | gain (%) | spectro (%) | T+LOS (%) | noise (%) | random (%) | syst (%) | total (%) |
|---------------|--------------------|----------|------------|---------|-----------|------------|----------|-------------|-----------|-----------|------------|----------|-----------|
| 30            | 0.00               | 8.08     | 0.52       | 0.35    | 0.66      | 1.41       | 5.72     | 8.79        | 2.00      | 37.92     | 38.03      | 13.16    | 40.25     |
| 40            | 0.00               | 15.88    | 0.64       | 1.49    | 0.57      | 2.86       | 8.49     | 12.07       | 3.96      | 65.96     | 68.12      | 14.40    | 69.63     |
| 50            | 0.00               | 21.70    | 0.79       | 1.48    | 0.35      | 2.72       | 3.61     | 10.92       | 3.60      | 83.26     | 85.27      | 16.97    | 86.94     |
| 60            | 0.01               | 16.39    | 1.06       | 1.54    | 0.64      | 3.10       | 2.56     | 11.35       | 5.39      | 83.72     | 85.00      | 15.21    | 86.35     |
| 70            | 0.14               | 20.85    | 0.92       | 3.06    | 0.91      | 2.81       | 2.81     | 20.78       | 3.09      | 56.38     | 61.43      | 17.53    | 63.88     |
| 80            | 0.63               | 20.27    | 1.04       | 1.23    | 1.18      | 2.82       | 2.13     | 16.86       | 1.13      | 55.13     | 57.94      | 19.87    | 61.26     |
| 90            | 4.33               | 16.37    | 0.82       | 0.83    | 0.89      | 2.17       | 3.84     | 16.55       | 3.99      | 41.24     | 43.59      | 19.49    | 47.75     |
| 100           | 21.34              | 22.25    | 0.67       | 0.76    | 0.44      | 1.76       | 0.68     | 8.06        | 2.23      | 28.40     | 28.56      | 23.69    | 37.10     |
| 110           | 77.39              | 21.98    | 0.67       | 1.17    | 0.35      | 1.19       | 1.96     | 12.16       | 8.15      | 22.54     | 29.33      | 18.77    | 34.82     |
| 120           | 107.40             | 24.30    | 0.28       | 1.88    | 0.21      | 0.80       | 1.64     | 11.63       | 6.47      | 10.04     | 21.78      | 20.03    | 29.59     |
| 130           | 130.01             | 26.47    | 0.33       | 2.06    | 0.27      | 0.77       | 1.81     | 11.64       | 4.28      | 10.70     | 22.61      | 21.58    | 31.26     |
| 140           | 144.65             | 25.97    | 0.49       | 1.96    | 0.26      | 0.80       | 1.88     | 10.89       | 3.39      | 12.89     | 22.81      | 21.42    | 31.29     |
| 150           | 152.40             | 24.81    | 0.55       | 1.81    | 0.23      | 0.85       | 1.89     | 10.01       | 2.77      | 13.75     | 22.42      | 20.44    | 30.34     |

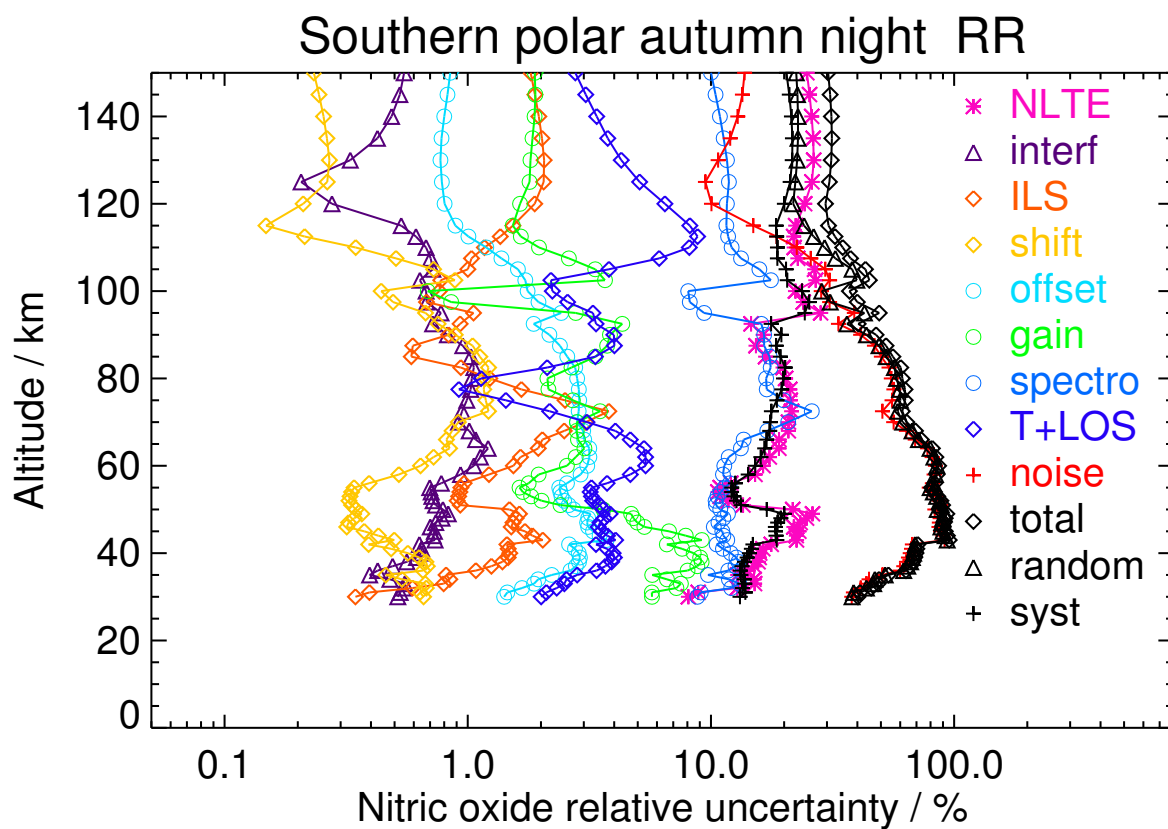

**Figure S68.** V8R\_NO\_261 Southern polar autumn night



**Table S70.** Nitric oxide error budget for Northern polar winter day. All uncertainties are  $1\sigma$ .

| altitude (km) | mean target (ppmv) | NLTE (%) | interf (%) | ILS (%) | shift (%) | offset (%) | gain (%) | spectro (%) | T+LOS (%) | noise (%) | random (%) | syst (%) | total (%) |
|---------------|--------------------|----------|------------|---------|-----------|------------|----------|-------------|-----------|-----------|------------|----------|-----------|
| 30            | 0.00               | 10.47    | 0.64       | 0.67    | 0.58      | 1.40       | 2.77     | 14.00       | 1.73      | 39.98     | 41.28      | 14.63    | 43.79     |
| 40            | 0.01               | 13.25    | 0.25       | 2.35    | 0.48      | 1.50       | 3.34     | 13.24       | 2.06      | 43.68     | 44.83      | 16.53    | 47.78     |
| 50            | 0.01               | 14.20    | 0.26       | 1.75    | 0.43      | 1.09       | 2.28     | 12.70       | 3.21      | 55.96     | 57.36      | 14.99    | 59.28     |
| 60            | 0.02               | 14.70    | 0.36       | 1.84    | 0.38      | 1.63       | 1.41     | 13.08       | 2.86      | 54.62     | 56.37      | 14.48    | 58.20     |
| 70            | 0.11               | 9.81     | 0.23       | 2.04    | 0.27      | 1.39       | 1.12     | 11.98       | 0.20      | 37.03     | 38.45      | 11.83    | 40.23     |
| 80            | 0.55               | 9.51     | 0.23       | 2.21    | 0.16      | 1.32       | 0.91     | 10.87       | 0.54      | 30.89     | 32.14      | 11.74    | 34.22     |
| 90            | 3.31               | 15.10    | 0.22       | 1.69    | 0.24      | 1.86       | 0.74     | 9.07        | 0.38      | 32.34     | 33.62      | 15.28    | 36.93     |
| 100           | 21.55              | 18.04    | 0.18       | 1.15    | 0.24      | 2.50       | 0.63     | 7.62        | 0.26      | 24.74     | 26.15      | 17.88    | 31.68     |
| 110           | 120.50             | 13.11    | 0.29       | 1.44    | 0.08      | 1.67       | 0.67     | 7.25        | 18.90     | 16.57     | 26.06      | 13.51    | 29.35     |
| 120           | 186.88             | 18.04    | 0.21       | 1.81    | 0.07      | 1.28       | 0.62     | 8.40        | 28.62     | 10.13     | 31.56      | 18.10    | 36.38     |
| 130           | 204.28             | 22.99    | 0.13       | 1.94    | 0.08      | 1.16       | 0.67     | 9.53        | 19.80     | 8.05      | 23.55      | 22.96    | 32.89     |
| 140           | 236.66             | 25.81    | 0.22       | 2.00    | 0.11      | 1.07       | 0.78     | 10.11       | 14.59     | 9.14      | 21.01      | 25.09    | 32.72     |
| 150           | 263.59             | 28.67    | 0.30       | 1.99    | 0.15      | 1.19       | 0.92     | 10.24       | 10.62     | 11.18     | 21.50      | 26.62    | 34.22     |

**S3 NO error contribution profile plots and tabulated values for RR MA data (V8R\_NO\_561)**

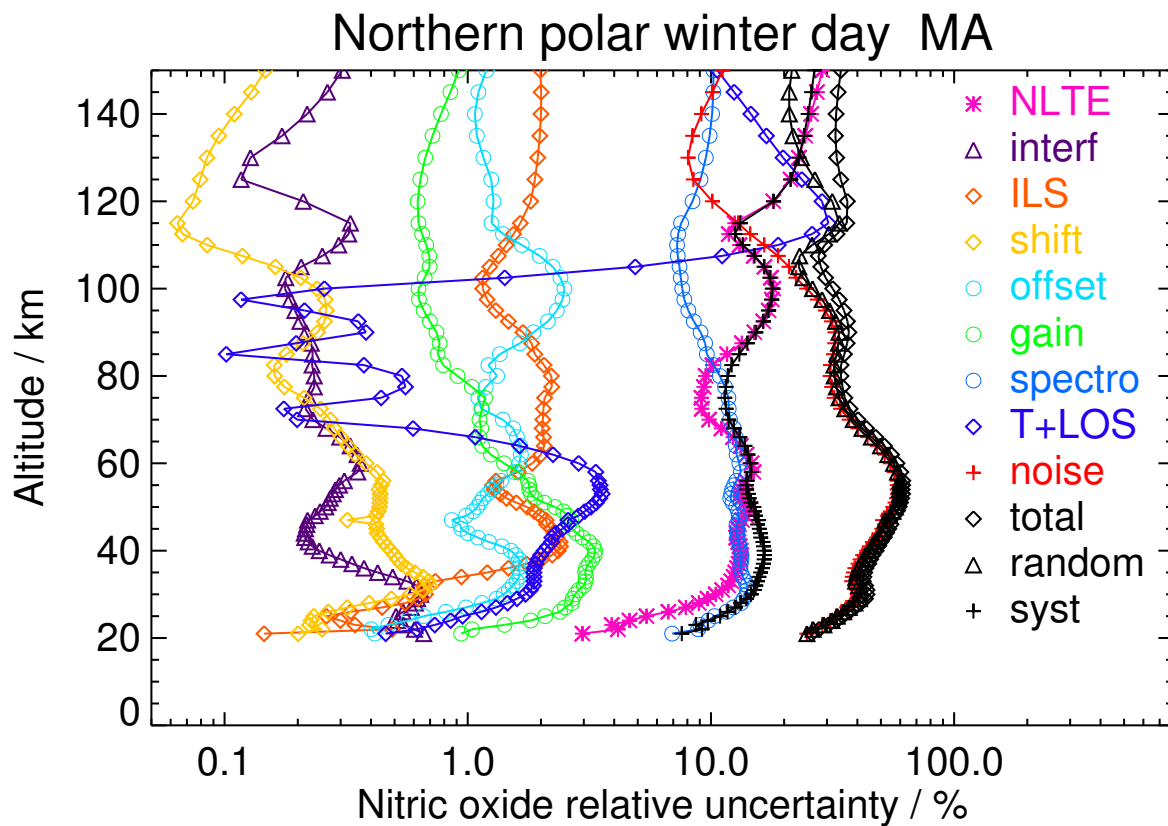

**Figure S69.** V8R\_NO\_561 Northern polar winter day

**Table S71.** Nitric oxide error budget for Northern polar winter night. All uncertainties are  $1\sigma$ .

| altitude (km) | mean target (ppmv) | NLTE (%) | interf (%) | ILS (%) | shift (%) | offset (%) | gain (%) | spectro (%) | T+LOS (%) | noise (%) | random (%) | syst (%) | total (%) |
|---------------|--------------------|----------|------------|---------|-----------|------------|----------|-------------|-----------|-----------|------------|----------|-----------|
| 40            | 0.00               | 3.88     | 2.49       | 1.44    | 1.34      | 3.52       | 13.02    | 8.50        | 2.32      | 80.62     | 81.85      | 9.26     | 82.37     |
| 50            | 0.00               | 9.63     | 0.56       | 2.50    | 0.47      | 1.29       | 2.25     | 17.41       | 4.20      | 54.32     | 57.15      | 10.55    | 58.12     |
| 60            | 0.04               | 16.50    | 0.53       | 2.24    | 0.70      | 2.33       | 2.11     | 11.75       | 4.62      | 48.93     | 52.63      | 8.42     | 53.30     |
| 70            | 0.27               | 13.64    | 0.40       | 2.14    | 0.90      | 3.55       | 1.54     | 11.91       | 2.56      | 37.61     | 41.27      | 8.12     | 42.07     |
| 80            | 0.73               | 30.81    | 0.35       | 2.38    | 0.31      | 2.96       | 2.41     | 13.04       | 0.16      | 37.45     | 48.87      | 12.41    | 50.42     |
| 90            | 4.50               | 14.52    | 0.30       | 1.59    | 0.28      | 2.20       | 0.92     | 9.76        | 1.23      | 37.91     | 39.73      | 13.21    | 41.87     |
| 100           | 22.44              | 19.65    | 0.28       | 1.14    | 0.28      | 2.94       | 0.81     | 8.82        | 2.83      | 33.79     | 36.11      | 17.91    | 40.30     |
| 110           | 111.27             | 20.42    | 0.30       | 1.32    | 0.16      | 2.18       | 0.91     | 8.54        | 20.74     | 23.73     | 34.71      | 16.91    | 38.61     |
| 120           | 203.19             | 19.71    | 0.22       | 1.76    | 0.07      | 0.97       | 0.73     | 9.09        | 28.79     | 10.37     | 33.09      | 17.82    | 37.58     |
| 130           | 200.31             | 23.93    | 0.12       | 1.94    | 0.07      | 1.21       | 0.64     | 9.92        | 19.94     | 9.75      | 26.80      | 21.24    | 34.20     |
| 140           | 214.66             | 25.02    | 0.21       | 1.92    | 0.09      | 1.28       | 0.64     | 9.81        | 15.27     | 11.92     | 25.01      | 21.85    | 33.21     |
| 150           | 227.89             | 25.07    | 0.28       | 1.80    | 0.09      | 1.32       | 0.63     | 9.23        | 11.89     | 13.41     | 24.13      | 21.41    | 32.26     |

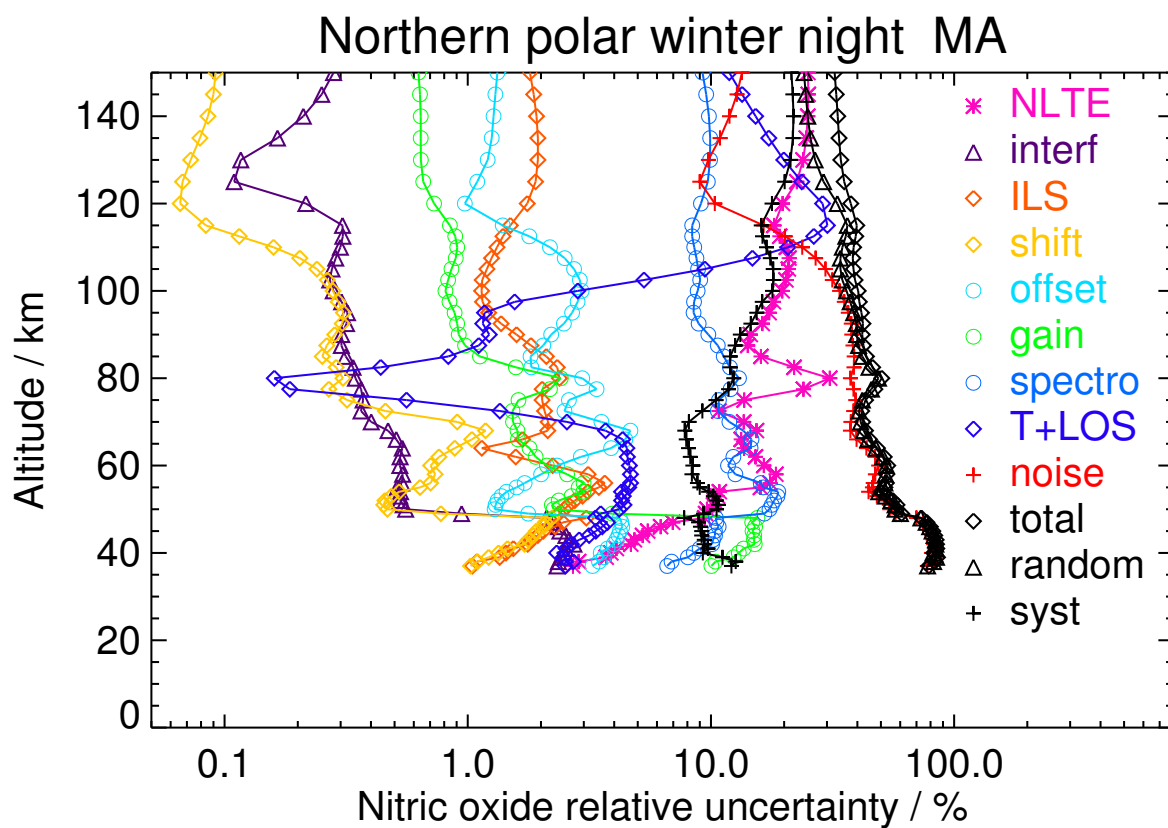

**Figure S70.** V8R\_NO\_561 Northern polar winter night

**Table S72.** Nitric oxide error budget for Northern polar spring day. All uncertainties are  $1\sigma$ .

| altitude<br>(km) | mean target<br>(ppmv) | NLTE<br>(%) | interf<br>(%) | ILS<br>(%) | shift<br>(%) | offset<br>(%) | gain<br>(%) | spectro<br>(%) | T+LOS<br>(%) | noise<br>(%) | random<br>(%) | syst<br>(%) | total<br>(%) |
|------------------|-----------------------|-------------|---------------|------------|--------------|---------------|-------------|----------------|--------------|--------------|---------------|-------------|--------------|
| 20               | 0.00                  | 4.76        | 0.38          | 0.50       | 0.12         | 0.53          | 2.09        | 6.01           | 1.33         | 21.97        | 22.47         | 6.59        | 23.42        |
| 30               | 0.01                  | 9.26        | 0.28          | 1.98       | 0.63         | 1.36          | 3.41        | 10.65          | 1.64         | 34.60        | 35.56         | 12.36       | 37.64        |
| 40               | 0.01                  | 4.43        | 0.16          | 1.51       | 0.42         | 0.75          | 2.17        | 10.77          | 1.09         | 23.93        | 24.83         | 10.05       | 26.78        |
| 50               | 0.01                  | 2.43        | 0.06          | 3.61       | 0.36         | 0.48          | 3.72        | 16.71          | 1.50         | 18.57        | 22.94         | 11.55       | 25.68        |
| 60               | 0.01                  | 14.73       | 0.20          | 1.55       | 0.34         | 1.49          | 1.05        | 10.46          | 2.22         | 49.79        | 51.46         | 12.98       | 53.07        |
| 70               | 0.02                  | 16.93       | 0.18          | 2.32       | 0.30         | 1.99          | 1.14        | 12.45          | 0.24         | 49.28        | 51.48         | 15.19       | 53.67        |
| 80               | 0.06                  | 30.07       | 0.20          | 1.79       | 0.29         | 2.85          | 0.90        | 11.79          | 0.72         | 56.00        | 60.64         | 22.70       | 64.74        |
| 90               | 0.53                  | 34.74       | 0.22          | 1.52       | 0.41         | 3.90          | 0.69        | 9.06           | 0.46         | 51.88        | 57.08         | 27.21       | 63.24        |
| 100              | 5.39                  | 42.73       | 0.21          | 1.28       | 0.41         | 3.86          | 0.62        | 7.90           | 0.30         | 38.20        | 45.00         | 36.61       | 58.01        |
| 110              | 41.01                 | 34.35       | 0.20          | 1.41       | 0.13         | 2.46          | 0.62        | 7.94           | 17.41        | 24.10        | 37.57         | 26.90       | 46.21        |
| 120              | 106.27                | 29.76       | 0.19          | 1.91       | 0.22         | 1.30          | 0.76        | 9.56           | 25.03        | 12.29        | 35.24         | 22.78       | 41.96        |
| 130              | 183.50                | 29.60       | 0.08          | 1.94       | 0.15         | 1.09          | 0.71        | 10.16          | 18.86        | 7.48         | 28.90         | 23.69       | 37.37        |
| 140              | 286.31                | 29.79       | 0.09          | 2.03       | 0.12         | 0.88          | 0.74        | 10.75          | 14.77        | 6.81         | 27.04         | 23.28       | 35.68        |
| 150              | 378.25                | 33.04       | 0.13          | 2.07       | 0.12         | 0.92          | 0.80        | 11.13          | 11.23        | 8.35         | 27.85         | 25.33       | 37.65        |

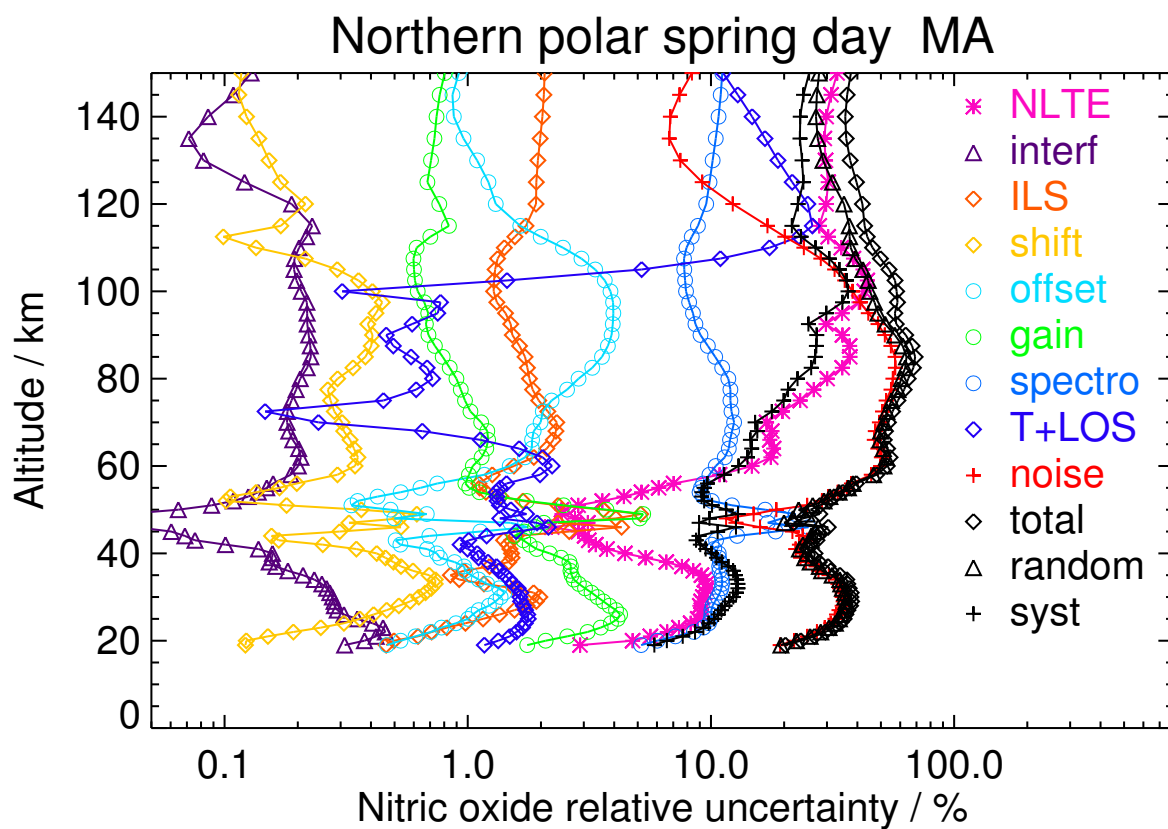

**Figure S71.** V8R\_NO\_561 Northern polar spring day

**Table S73.** Nitric oxide error budget for Northern polar spring night. All uncertainties are  $1\sigma$ .

| altitude (km) | mean target (ppmv) | NLTE (%) | interf (%) | ILS (%) | shift (%) | offset (%) | gain (%) | spectro (%) | T+LOS (%) | noise (%) | random (%) | syst (%) | total (%) |
|---------------|--------------------|----------|------------|---------|-----------|------------|----------|-------------|-----------|-----------|------------|----------|-----------|
| 40            | 0.00               | 3.09     | 0.67       | 0.23    | 0.06      | 0.83       | 0.39     | 1.20        | 0.94      | 43.28     | 43.41      | 1.37     | 43.43     |
| 50            | 0.00               | 5.62     | 0.25       | 0.34    | 0.18      | 0.97       | 1.04     | 10.42       | 1.88      | 36.37     | 37.72      | 6.77     | 38.32     |
| 60            | 0.01               | 11.10    | 0.36       | 1.12    | 0.26      | 2.05       | 1.44     | 12.72       | 1.83      | 54.02     | 55.83      | 9.84     | 56.69     |
| 70            | 0.12               | 1.71     | 0.14       | 0.57    | 0.24      | 1.73       | 0.78     | 8.13        | 0.40      | 41.07     | 41.40      | 6.76     | 41.95     |
| 80            | 0.13               | 3.09     | 0.33       | 1.22    | 0.42      | 2.44       | 0.57     | 9.01        | 0.37      | 53.21     | 53.70      | 6.80     | 54.13     |
| 90            | 0.74               | 31.84    | 0.33       | 0.84    | 0.52      | 3.31       | 1.19     | 9.05        | 0.20      | 44.05     | 51.38      | 20.25    | 55.23     |
| 100           | 4.78               | 33.79    | 0.31       | 1.20    | 0.42      | 3.82       | 1.06     | 9.28        | 1.55      | 38.72     | 45.10      | 26.70    | 52.41     |
| 110           | 37.12              | 24.43    | 0.27       | 1.34    | 0.18      | 2.63       | 0.60     | 8.37        | 17.89     | 27.91     | 36.50      | 21.04    | 42.13     |
| 120           | 79.09              | 25.22    | 0.20       | 1.78    | 0.09      | 1.15       | 0.63     | 10.26       | 23.64     | 12.02     | 32.66      | 19.56    | 38.07     |
| 130           | 111.50             | 27.73    | 0.05       | 2.03    | 0.09      | 1.04       | 0.68     | 11.10       | 19.74     | 7.72      | 30.06      | 21.06    | 36.70     |
| 140           | 145.28             | 27.88    | 0.12       | 2.03    | 0.08      | 1.04       | 0.68     | 10.64       | 16.01     | 9.14      | 27.97      | 21.30    | 35.16     |
| 150           | 168.58             | 28.27    | 0.17       | 1.92    | 0.07      | 1.16       | 0.66     | 9.70        | 12.67     | 11.29     | 27.14      | 21.22    | 34.45     |

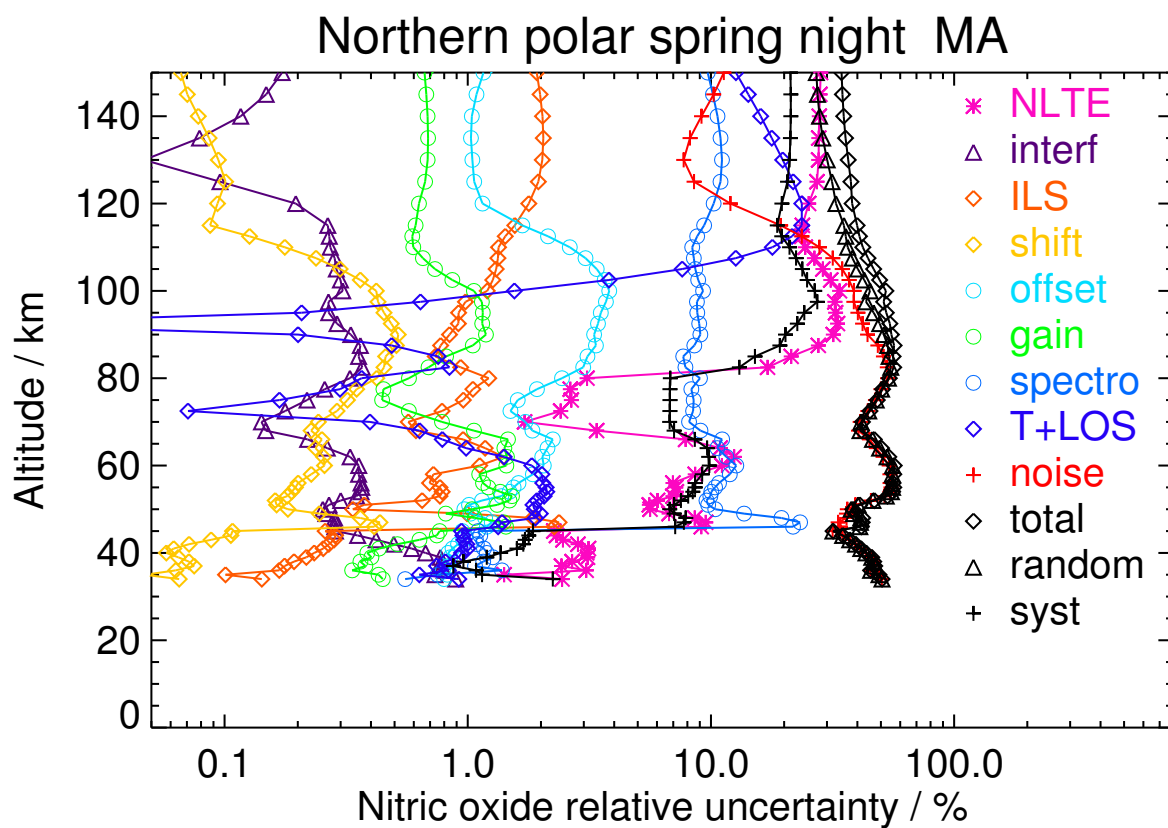

**Figure S72.** V8R\_NO\_561 Northern polar spring night

**Table S74.** Nitric oxide error budget for Northern polar summer day. All uncertainties are  $1\sigma$ .

| altitude (km) | mean target (ppmv) | NLTE (%) | interf (%) | ILS (%) | shift (%) | offset (%) | gain (%) | spectro (%) | T+LOS (%) | noise (%) | random (%) | syst (%) | total (%) |
|---------------|--------------------|----------|------------|---------|-----------|------------|----------|-------------|-----------|-----------|------------|----------|-----------|
| 20            | 0.00               | 1.47     | 0.47       | 0.34    | 0.13      | 0.46       | 2.38     | 7.92        | 1.31      | 19.57     | 19.90      | 7.73     | 21.35     |
| 30            | 0.01               | 4.05     | 0.15       | 2.53    | 0.26      | 0.67       | 2.59     | 9.07        | 1.61      | 17.77     | 18.07      | 10.20    | 20.75     |
| 40            | 0.01               | 2.26     | 0.13       | 0.62    | 0.27      | 0.43       | 1.45     | 8.66        | 0.95      | 15.75     | 15.90      | 8.88     | 18.22     |
| 50            | 0.01               | 1.35     | 0.08       | 1.04    | 0.10      | 0.18       | 1.28     | 8.19        | 0.70      | 18.15     | 18.31      | 8.15     | 20.04     |
| 60            | 0.01               | 6.78     | 0.23       | 1.27    | 0.45      | 1.15       | 0.76     | 9.70        | 3.10      | 41.51     | 42.19      | 9.85     | 43.32     |
| 70            | 0.02               | 13.09    | 0.18       | 1.98    | 0.71      | 1.49       | 1.49     | 13.60       | 0.63      | 38.23     | 40.97      | 12.19    | 42.75     |
| 80            | 0.03               | 15.28    | 0.28       | 1.87    | 0.80      | 2.32       | 0.81     | 11.24       | 1.91      | 40.89     | 41.96      | 16.88    | 45.22     |
| 90            | 0.80               | 26.82    | 0.25       | 1.78    | 0.96      | 2.83       | 1.09     | 11.95       | 3.62      | 35.96     | 42.22      | 19.98    | 46.71     |
| 100           | 20.65              | 17.03    | 0.17       | 1.54    | 0.35      | 2.51       | 0.68     | 8.58        | 3.98      | 24.86     | 27.57      | 15.70    | 31.73     |
| 110           | 53.55              | 16.23    | 0.26       | 1.70    | 0.21      | 1.15       | 0.79     | 8.67        | 23.44     | 13.17     | 29.04      | 14.94    | 32.66     |
| 120           | 80.94              | 22.92    | 0.17       | 1.85    | 0.19      | 1.27       | 0.75     | 9.84        | 26.21     | 9.87      | 31.22      | 20.91    | 37.58     |
| 130           | 141.08             | 26.50    | 0.15       | 2.07    | 0.19      | 1.20       | 0.80     | 11.32       | 24.96     | 9.84      | 32.22      | 22.76    | 39.45     |
| 140           | 234.84             | 28.46    | 0.25       | 2.11    | 0.18      | 1.20       | 0.91     | 11.73       | 23.05     | 11.08     | 32.38      | 23.65    | 40.10     |
| 150           | 311.39             | 30.05    | 0.32       | 2.02    | 0.17      | 1.32       | 1.03     | 11.29       | 20.21     | 12.89     | 31.93      | 24.34    | 40.15     |

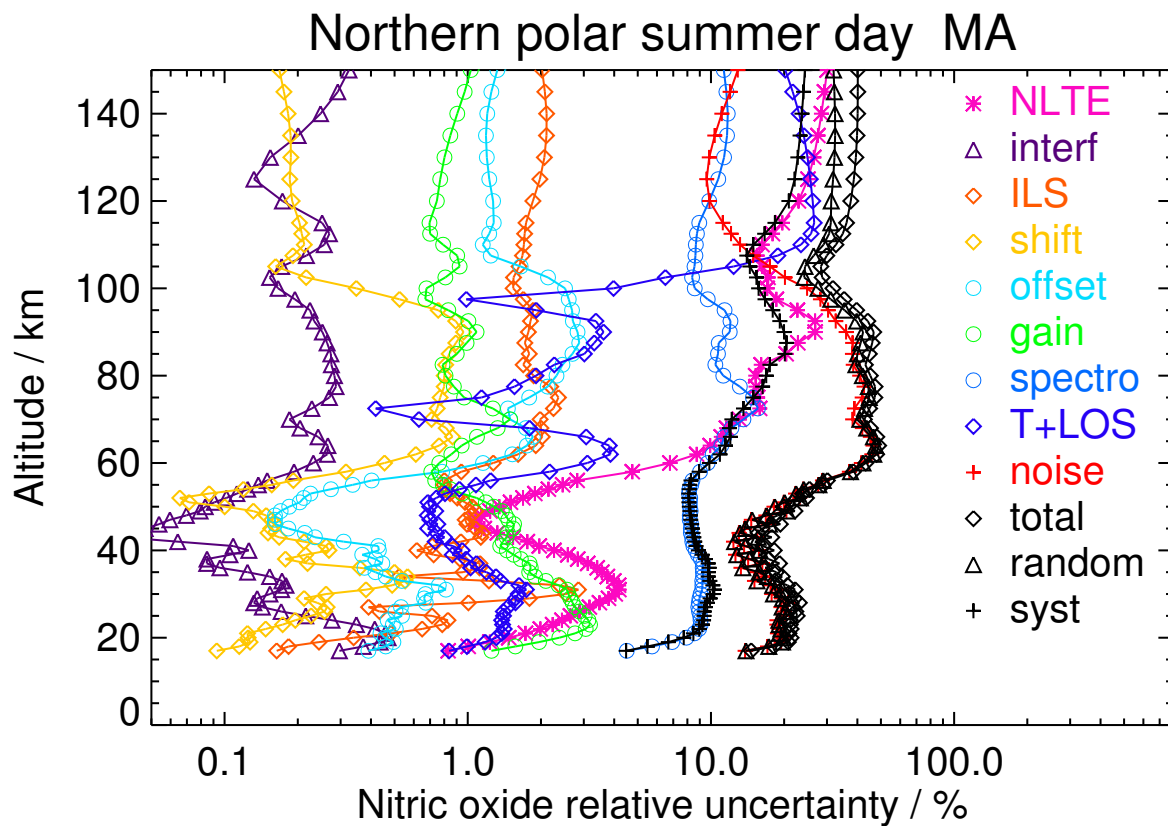

**Figure S73.** V8R\_NO\_561 Northern polar summer day

**Table S75.** Nitric oxide error budget for Northern polar summer night. All uncertainties are  $1\sigma$ .

| altitude (km) | mean target (ppmv) | NLTE (%) | interf (%) | ILS (%) | shift (%) | offset (%) | gain (%) | spectro (%) | T+LOS (%) | noise (%) | random (%) | syst (%) | total (%) |
|---------------|--------------------|----------|------------|---------|-----------|------------|----------|-------------|-----------|-----------|------------|----------|-----------|
| 40            | 0.00               | 2.49     | 0.80       | 0.14    | 0.17      | 0.69       | 0.83     | 1.06        | 1.30      | 42.82     | 42.92      | 1.62     | 42.95     |
| 50            | 0.00               | 4.53     | 0.45       | 0.48    | 0.30      | 1.22       | 2.27     | 3.87        | 2.59      | 39.33     | 39.70      | 4.43     | 39.95     |
| 60            | 0.00               | 8.05     | 0.48       | 0.71    | 0.40      | 2.17       | 1.11     | 9.47        | 3.31      | 60.56     | 61.39      | 8.45     | 61.97     |
| 90            | 0.63               | 21.21    | 0.49       | 0.92    | 0.72      | 3.96       | 0.71     | 7.71        | 1.39      | 47.31     | 49.63      | 17.44    | 52.60     |
| 100           | 11.07              | 19.02    | 0.35       | 1.25    | 0.46      | 3.31       | 0.71     | 9.11        | 4.36      | 32.62     | 36.11      | 15.40    | 39.26     |
| 110           | 50.06              | 14.45    | 0.30       | 1.44    | 0.16      | 1.82       | 0.73     | 9.01        | 25.86     | 19.99     | 34.12      | 14.14    | 36.94     |
| 120           | 86.25              | 19.14    | 0.14       | 1.37    | 0.14      | 1.22       | 0.51     | 8.26        | 24.45     | 9.47      | 29.34      | 16.28    | 33.55     |
| 130           | 101.36             | 23.13    | 0.13       | 1.60    | 0.12      | 1.36       | 0.58     | 9.07        | 20.09     | 10.00     | 28.63      | 17.49    | 33.55     |
| 140           | 131.67             | 23.30    | 0.17       | 1.72    | 0.09      | 1.29       | 0.62     | 9.28        | 16.80     | 11.20     | 27.15      | 17.46    | 32.28     |
| 150           | 160.67             | 25.71    | 0.21       | 1.72    | 0.09      | 1.33       | 0.65     | 8.80        | 13.52     | 12.58     | 27.88      | 17.53    | 32.94     |

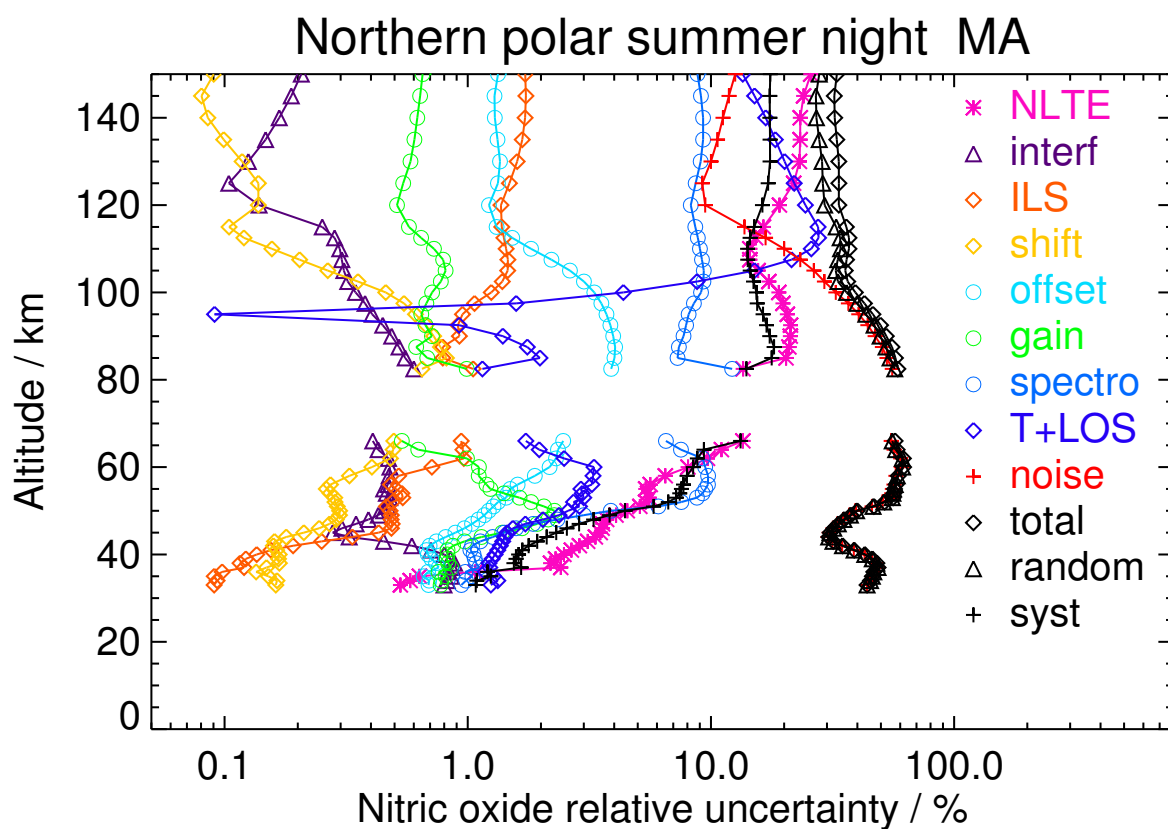

**Figure S74.** V8R\_NO\_561 Northern polar summer night

**Table S76.** Nitric oxide error budget for Northern polar autumn day. All uncertainties are  $1\sigma$ .

| altitude (km) | mean target (ppmv) | NLTE (%) | interf (%) | ILS (%) | shift (%) | offset (%) | gain (%) | spectro (%) | T+LOS (%) | noise (%) | random (%) | syst (%) | total (%) |
|---------------|--------------------|----------|------------|---------|-----------|------------|----------|-------------|-----------|-----------|------------|----------|-----------|
| 20            | 0.00               | 1.87     | 0.43       | 0.13    | 0.11      | 0.48       | 1.34     | 5.24        | 0.70      | 23.21     | 23.28      | 5.50     | 23.92     |
| 30            | 0.01               | 8.27     | 0.17       | 0.86    | 0.32      | 1.06       | 3.97     | 10.77       | 1.43      | 25.68     | 26.22      | 13.26    | 29.38     |
| 40            | 0.01               | 6.11     | 0.14       | 1.63    | 0.29      | 0.89       | 2.35     | 11.05       | 0.87      | 29.09     | 29.58      | 11.83    | 31.86     |
| 50            | 0.00               | 3.85     | 0.14       | 1.40    | 0.09      | 0.75       | 1.49     | 10.09       | 1.07      | 41.14     | 41.52      | 9.56     | 42.60     |
| 60            | 0.00               | 9.23     | 0.25       | 1.81    | 0.08      | 2.21       | 0.96     | 11.79       | 1.23      | 65.86     | 66.58      | 11.79    | 67.62     |
| 70            | 0.01               | 13.89    | 0.32       | 2.17    | 0.15      | 2.55       | 0.79     | 12.50       | 0.09      | 68.59     | 69.63      | 14.77    | 71.18     |
| 80            | 0.05               | 15.12    | 0.42       | 1.92    | 0.21      | 3.20       | 0.72     | 11.20       | 0.43      | 66.69     | 67.56      | 15.87    | 69.40     |
| 90            | 0.58               | 17.36    | 0.48       | 1.83    | 0.25      | 3.86       | 0.72     | 10.60       | 0.35      | 53.40     | 54.87      | 16.52    | 57.31     |
| 100           | 4.39               | 15.61    | 0.46       | 1.68    | 0.21      | 3.92       | 0.64     | 9.66        | 0.54      | 41.57     | 42.66      | 16.23    | 45.65     |
| 110           | 28.68              | 13.57    | 0.34       | 1.51    | 0.10      | 2.48       | 0.57     | 8.98        | 9.58      | 27.85     | 30.22      | 15.08    | 33.78     |
| 120           | 47.03              | 17.79    | 0.12       | 1.72    | 0.05      | 1.04       | 0.59     | 9.68        | 20.50     | 11.35     | 25.41      | 17.83    | 31.04     |
| 130           | 75.66              | 20.93    | 0.11       | 1.78    | 0.08      | 1.32       | 0.61     | 9.75        | 18.42     | 10.73     | 24.34      | 20.01    | 31.51     |
| 140           | 109.31             | 21.66    | 0.19       | 1.75    | 0.10      | 1.47       | 0.63     | 9.51        | 16.14     | 12.76     | 23.98      | 20.35    | 31.45     |
| 150           | 141.77             | 21.13    | 0.24       | 1.65    | 0.10      | 1.52       | 0.62     | 8.91        | 13.76     | 14.15     | 23.08      | 19.70    | 30.35     |

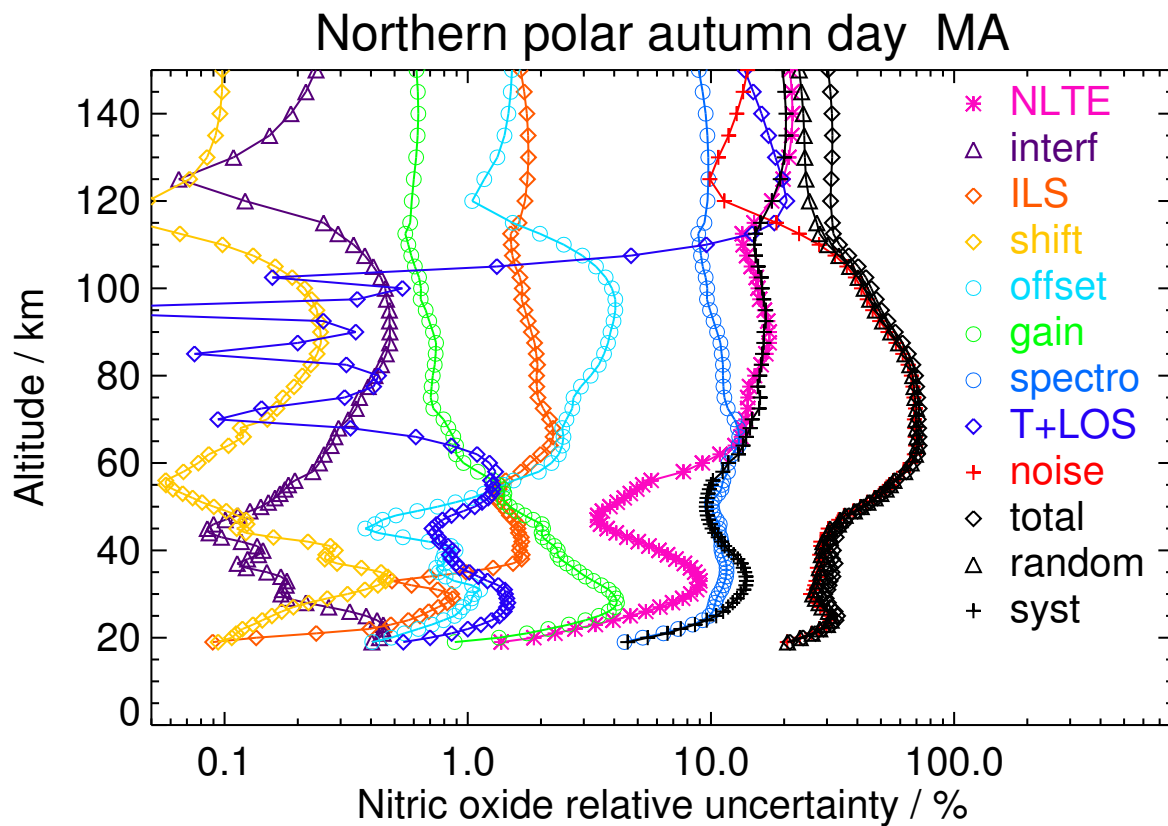

**Figure S75.** V8R\_NO\_561 Northern polar autumn day

**Table S77.** Nitric oxide error budget for Northern polar autumn night. All uncertainties are  $1\sigma$ .

| altitude (km) | mean target (ppmv) | NLTE (%) | interf (%) | ILS (%) | shift (%) | offset (%) | gain (%) | spectro (%) | T+LOS (%) | noise (%) | random (%) | syst (%) | total (%) |
|---------------|--------------------|----------|------------|---------|-----------|------------|----------|-------------|-----------|-----------|------------|----------|-----------|
| 40            | 0.00               | 4.98     | 0.37       | 1.02    | 0.22      | 2.38       | 1.57     | 8.61        | 2.16      | 67.73     | 68.29      | 6.02     | 68.55     |
| 50            | 0.00               | 7.04     | 0.29       | 0.99    | 0.13      | 1.87       | 0.87     | 9.80        | 2.59      | 64.67     | 65.39      | 7.96     | 65.88     |
| 60            | 0.01               | 8.97     | 0.33       | 1.11    | 0.10      | 2.44       | 1.23     | 11.50       | 2.92      | 59.69     | 60.87      | 9.35     | 61.58     |
| 70            | 0.04               | 9.84     | 0.36       | 1.36    | 0.16      | 2.46       | 1.61     | 11.32       | 1.75      | 57.85     | 58.91      | 10.70    | 59.87     |
| 80            | 0.15               | 14.60    | 0.46       | 2.37    | 0.21      | 2.72       | 1.34     | 14.77       | 0.22      | 57.65     | 59.83      | 13.79    | 61.40     |
| 90            | 1.28               | 18.68    | 0.49       | 2.31    | 0.27      | 3.34       | 1.29     | 14.13       | 1.92      | 47.72     | 50.97      | 15.80    | 53.36     |
| 100           | 7.03               | 19.35    | 0.47       | 1.82    | 0.25      | 3.46       | 0.93     | 12.05       | 1.35      | 37.83     | 40.88      | 17.27    | 44.37     |
| 110           | 39.77              | 16.88    | 0.37       | 1.57    | 0.11      | 2.21       | 0.78     | 10.29       | 18.25     | 26.13     | 34.15      | 15.76    | 37.61     |
| 120           | 69.66              | 20.61    | 0.12       | 1.82    | 0.06      | 0.99       | 0.73     | 10.66       | 24.78     | 10.71     | 30.60      | 18.32    | 35.66     |
| 130           | 83.37              | 23.90    | 0.16       | 2.05    | 0.09      | 1.36       | 0.72     | 11.17       | 20.62     | 11.75     | 29.12      | 20.45    | 35.58     |
| 140           | 101.23             | 24.39    | 0.24       | 2.06    | 0.10      | 1.48       | 0.72     | 10.96       | 17.74     | 13.87     | 28.43      | 20.52    | 35.06     |
| 150           | 118.21             | 23.44    | 0.28       | 1.96    | 0.10      | 1.49       | 0.69     | 10.24       | 15.04     | 14.74     | 26.91      | 19.50    | 33.24     |

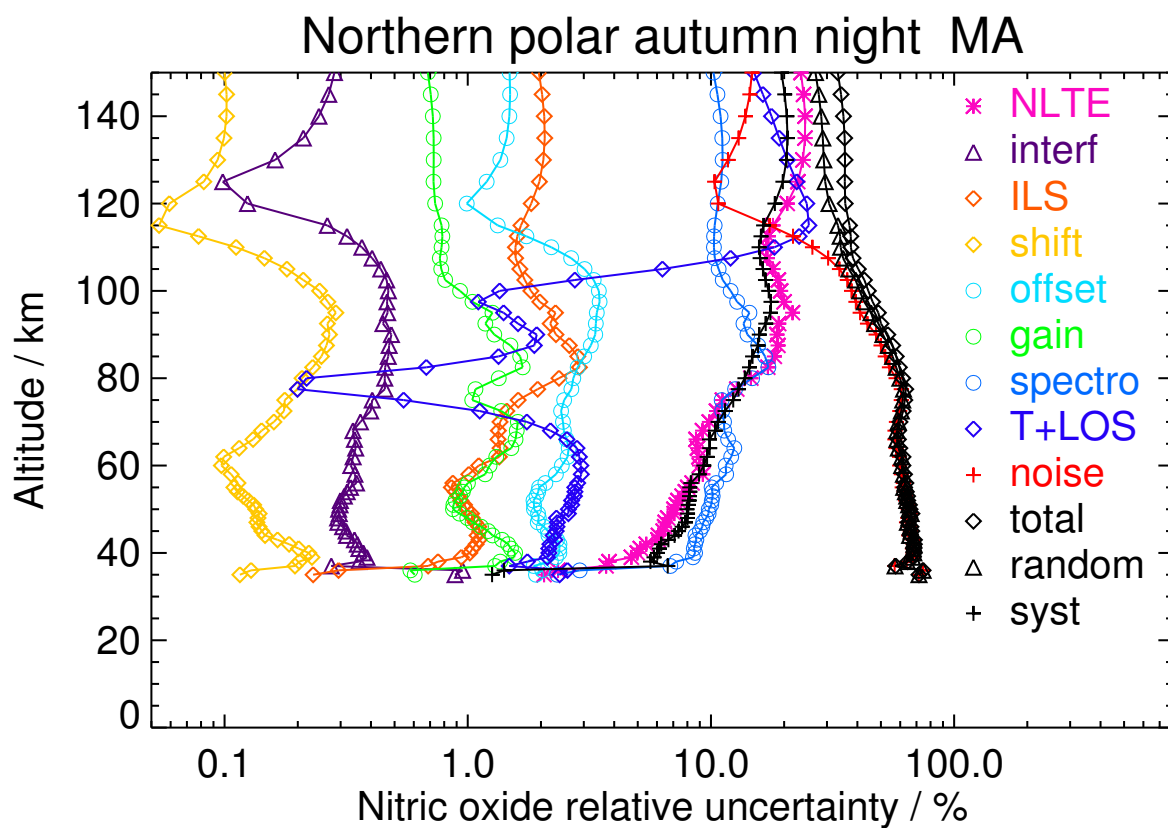

**Figure S76.** V8R\_NO\_561 Northern polar autumn night



**Table S78.** Nitric oxide error budget for Northern midlatitude winter day. All uncertainties are  $1\sigma$ .

| altitude (km) | mean target (ppmv) | NLTE (%) | interf (%) | ILS (%) | shift (%) | offset (%) | gain (%) | spectro (%) | T+LOS (%) | noise (%) | random (%) | syst (%) | total (%) |
|---------------|--------------------|----------|------------|---------|-----------|------------|----------|-------------|-----------|-----------|------------|----------|-----------|
| 20            | 0.00               | 1.95     | 0.85       | 0.22    | 0.11      | 0.48       | 1.50     | 5.71        | 0.59      | 24.51     | 24.64      | 5.80     | 25.31     |
| 30            | 0.00               | 9.25     | 0.22       | 0.71    | 0.39      | 1.04       | 3.29     | 11.83       | 1.29      | 26.38     | 26.94      | 14.47    | 30.58     |
| 40            | 0.01               | 6.88     | 0.07       | 1.65    | 0.21      | 0.67       | 2.33     | 10.57       | 0.99      | 24.26     | 24.64      | 12.25    | 27.52     |
| 50            | 0.01               | 3.71     | 0.11       | 1.19    | 0.07      | 0.63       | 1.76     | 9.48        | 1.06      | 35.75     | 36.08      | 9.27     | 37.26     |
| 60            | 0.01               | 10.87    | 0.26       | 1.52    | 0.11      | 2.35       | 1.30     | 9.62        | 1.59      | 62.37     | 63.22      | 10.77    | 64.13     |
| 70            | 0.02               | 15.80    | 0.33       | 1.94    | 0.20      | 2.76       | 0.96     | 9.72        | 0.14      | 64.31     | 65.59      | 13.83    | 67.03     |
| 80            | 0.07               | 21.22    | 0.35       | 1.64    | 0.22      | 2.96       | 0.93     | 9.57        | 0.42      | 58.19     | 60.37      | 17.20    | 62.77     |
| 90            | 0.73               | 22.75    | 0.31       | 1.36    | 0.27      | 3.40       | 0.68     | 8.55        | 0.28      | 45.28     | 48.19      | 18.25    | 51.52     |
| 100           | 5.73               | 23.19    | 0.26       | 1.19    | 0.29      | 3.29       | 0.59     | 8.06        | 0.28      | 33.20     | 37.62      | 17.39    | 41.45     |
| 110           | 29.82              | 17.09    | 0.26       | 1.41    | 0.13      | 2.20       | 0.56     | 8.03        | 13.54     | 23.49     | 30.02      | 14.05    | 33.15     |
| 120           | 52.40              | 18.93    | 0.18       | 1.99    | 0.07      | 1.15       | 0.66     | 9.89        | 24.25     | 11.65     | 30.93      | 15.12    | 34.43     |
| 130           | 72.77              | 22.95    | 0.07       | 2.15    | 0.12      | 1.13       | 0.81     | 10.72       | 20.33     | 8.48      | 28.46      | 17.98    | 33.67     |
| 140           | 96.21              | 24.00    | 0.08       | 2.07    | 0.15      | 1.11       | 0.90     | 10.54       | 16.64     | 9.01      | 26.31      | 18.95    | 32.43     |
| 150           | 120.34             | 24.32    | 0.13       | 1.90    | 0.15      | 1.17       | 0.95     | 9.84        | 13.25     | 10.69     | 24.82      | 19.19    | 31.37     |

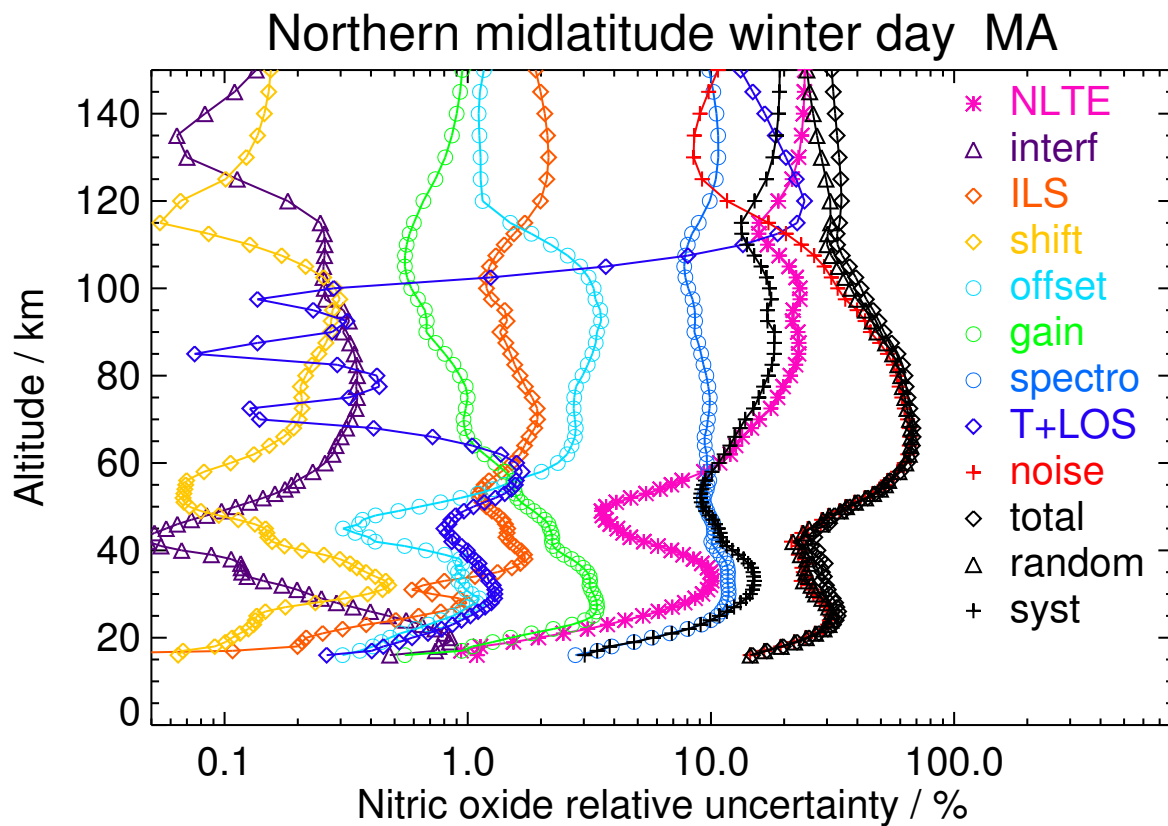

**Figure S77.** V8R\_NO\_561 Northern midlatitude winter day

**Table S79.** Nitric oxide error budget for Northern midlatitude winter night. All uncertainties are  $1\sigma$ .

| altitude (km) | mean target (ppmv) | NLTE (%) | interf (%) | ILS (%) | shift (%) | offset (%) | gain (%) | spectro (%) | T+LOS (%) | noise (%) | random (%) | syst (%) | total (%) |
|---------------|--------------------|----------|------------|---------|-----------|------------|----------|-------------|-----------|-----------|------------|----------|-----------|
| 60            | 0.00               | 3.81     | 0.46       | 0.55    | 0.21      | 3.33       | 1.09     | 7.89        | 2.18      | 84.83     | 85.17      | 6.05     | 85.38     |
| 70            | 0.02               | 3.03     | 0.37       | 0.66    | 0.19      | 2.90       | 0.81     | 7.47        | 0.50      | 71.05     | 71.23      | 6.99     | 71.57     |
| 80            | 0.16               | 26.91    | 0.47       | 1.19    | 0.81      | 2.97       | 0.48     | 4.18        | 0.39      | 65.94     | 70.33      | 12.44    | 71.42     |
| 90            | 1.28               | 27.27    | 0.32       | 0.74    | 0.70      | 3.27       | 0.40     | 4.45        | 0.92      | 47.60     | 53.73      | 12.47    | 55.15     |
| 100           | 8.88               | 27.32    | 0.30       | 0.78    | 0.55      | 3.14       | 0.47     | 8.32        | 3.58      | 33.57     | 42.22      | 13.58    | 44.35     |
| 110           | 23.83              | 30.59    | 0.35       | 2.04    | 0.27      | 1.93       | 1.20     | 12.93       | 23.50     | 21.18     | 44.25      | 12.45    | 45.97     |
| 120           | 38.68              | 32.27    | 0.40       | 2.78    | 0.13      | 1.20       | 1.35     | 13.49       | 28.63     | 11.54     | 45.16      | 12.15    | 46.77     |
| 130           | 31.41              | 35.41    | 0.18       | 2.77    | 0.08      | 1.39       | 0.90     | 14.34       | 21.06     | 13.12     | 43.37      | 14.32    | 45.68     |
| 140           | 31.49              | 36.16    | 0.33       | 2.57    | 0.10      | 1.59       | 0.86     | 13.62       | 17.01     | 15.49     | 42.61      | 14.72    | 45.08     |
| 150           | 33.22              | 34.87    | 0.40       | 2.29    | 0.10      | 1.67       | 0.80     | 12.23       | 13.90     | 16.46     | 40.47      | 14.17    | 42.88     |

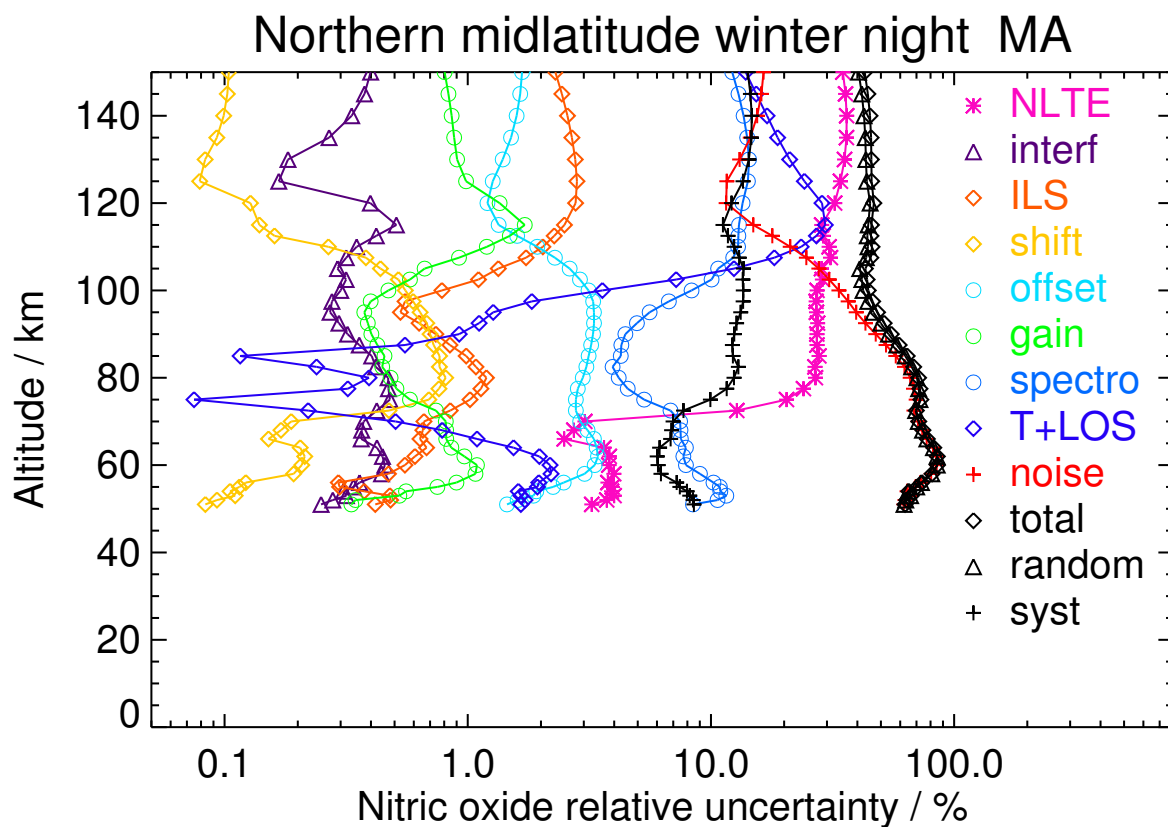

**Figure S78.** V8R\_NO\_561 Northern midlatitude winter night

**Table S80.** Nitric oxide error budget for Northern midlatitude spring day. All uncertainties are  $1\sigma$ .

| altitude (km) | mean target (ppmv) | NLTE (%) | interf (%) | ILS (%) | shift (%) | offset (%) | gain (%) | spectro (%) | T+LOS (%) | noise (%) | random (%) | syst (%) | total (%) |
|---------------|--------------------|----------|------------|---------|-----------|------------|----------|-------------|-----------|-----------|------------|----------|-----------|
| 20            | 0.00               | 1.87     | 0.39       | 0.37    | 0.13      | 0.52       | 1.58     | 5.75        | 0.87      | 24.23     | 24.37      | 5.80     | 25.05     |
| 30            | 0.00               | 11.69    | 0.18       | 1.58    | 0.36      | 1.09       | 3.73     | 13.03       | 1.48      | 24.72     | 25.35      | 17.18    | 30.62     |
| 40            | 0.01               | 4.53     | 0.11       | 0.91    | 0.33      | 0.60       | 2.14     | 10.24       | 0.97      | 17.34     | 17.97      | 10.49    | 20.81     |
| 50            | 0.01               | 1.62     | 0.08       | 1.10    | 0.07      | 0.30       | 1.56     | 9.03        | 0.78      | 23.03     | 23.33      | 8.65     | 24.88     |
| 60            | 0.01               | 9.58     | 0.27       | 1.45    | 0.20      | 2.09       | 1.14     | 9.87        | 1.99      | 58.10     | 58.86      | 10.56    | 59.80     |
| 70            | 0.02               | 27.85    | 0.26       | 2.49    | 0.19      | 1.94       | 1.98     | 12.18       | 0.15      | 53.69     | 59.38      | 17.17    | 61.81     |
| 80            | 0.04               | 23.05    | 0.39       | 1.47    | 0.41      | 3.25       | 0.93     | 9.03        | 0.65      | 59.44     | 62.20      | 17.05    | 64.50     |
| 90            | 0.38               | 27.07    | 0.48       | 1.56    | 0.51      | 4.39       | 1.00     | 7.63        | 0.32      | 55.68     | 57.98      | 23.52    | 62.57     |
| 100           | 3.15               | 34.11    | 0.39       | 1.50    | 0.48      | 4.03       | 0.86     | 7.83        | 0.32      | 41.64     | 48.34      | 25.32    | 54.57     |
| 110           | 20.25              | 27.90    | 0.38       | 1.64    | 0.29      | 2.65       | 0.85     | 8.58        | 13.34     | 28.37     | 37.76      | 20.47    | 42.96     |
| 120           | 46.67              | 23.32    | 0.28       | 1.84    | 0.10      | 1.26       | 0.63     | 9.52        | 22.46     | 13.44     | 31.82      | 17.67    | 36.40     |
| 130           | 85.55              | 24.44    | 0.12       | 1.85    | 0.16      | 1.04       | 0.68     | 9.75        | 20.07     | 7.89      | 28.88      | 18.12    | 34.10     |
| 140           | 141.10             | 22.32    | 0.08       | 1.79    | 0.19      | 0.93       | 0.90     | 9.69        | 17.23     | 7.45      | 24.90      | 18.14    | 30.81     |
| 150           | 190.15             | 22.88    | 0.13       | 1.68    | 0.20      | 0.99       | 1.13     | 9.45        | 14.14     | 9.18      | 23.57      | 18.61    | 30.03     |

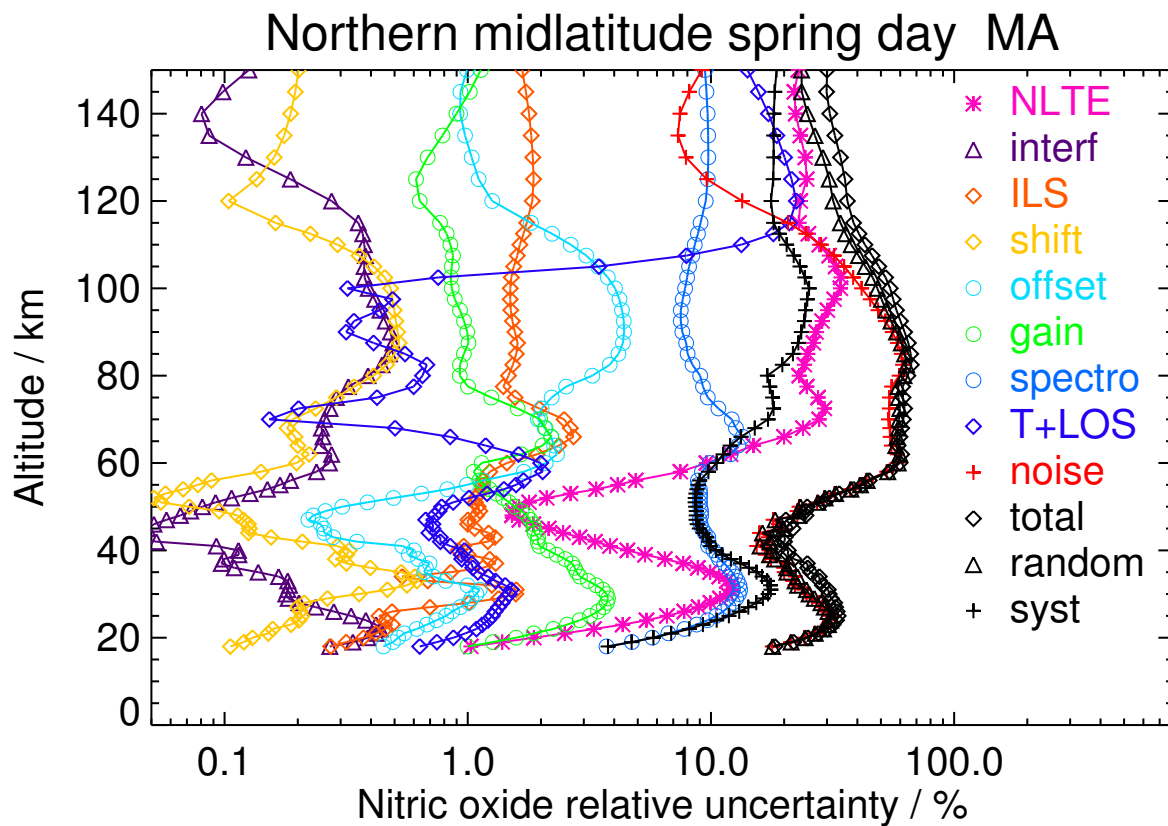

**Figure S79.** V8R\_NO\_561 Northern midlatitude spring day

**Table S81.** Nitric oxide error budget for Northern midlatitude spring night. All uncertainties are  $1\sigma$ .

| altitude (km) | mean target (ppmv) | NLTE (%) | interf (%) | ILS (%) | shift (%) | offset (%) | gain (%) | spectro (%) | T+LOS (%) | noise (%) | random (%) | syst (%) | total (%) |
|---------------|--------------------|----------|------------|---------|-----------|------------|----------|-------------|-----------|-----------|------------|----------|-----------|
| 60            | 0.00               | 7.09     | 0.49       | 0.92    | 0.26      | 2.57       | 1.23     | 9.56        | 2.07      | 67.30     | 68.05      | 7.39     | 68.45     |
| 70            | 0.04               | 4.00     | 0.20       | 0.76    | 0.19      | 2.24       | 0.83     | 12.63       | 0.42      | 47.70     | 48.77      | 8.91     | 49.57     |
| 80            | 0.08               | 6.73     | 0.36       | 1.16    | 0.34      | 1.97       | 1.78     | 14.25       | 0.46      | 45.56     | 47.53      | 8.58     | 48.30     |
| 90            | 0.47               | 15.27    | 0.73       | 1.07    | 0.57      | 3.81       | 0.63     | 8.65        | 0.09      | 55.46     | 56.77      | 13.35    | 58.32     |
| 100           | 3.56               | 26.81    | 0.50       | 1.06    | 0.42      | 3.71       | 0.53     | 9.00        | 1.25      | 39.92     | 45.61      | 18.16    | 49.09     |
| 110           | 23.66              | 31.43    | 0.44       | 1.54    | 0.21      | 2.36       | 0.73     | 10.63       | 16.10     | 26.78     | 41.62      | 18.79    | 45.67     |
| 120           | 56.79              | 31.84    | 0.29       | 2.28    | 0.09      | 1.19       | 0.88     | 13.64       | 23.42     | 12.97     | 40.28      | 17.37    | 43.86     |
| 130           | 75.31              | 33.12    | 0.11       | 2.64    | 0.11      | 1.23       | 0.95     | 14.36       | 20.27     | 10.34     | 38.84      | 17.92    | 42.78     |
| 140           | 93.14              | 33.00    | 0.23       | 2.60    | 0.10      | 1.32       | 0.93     | 13.43       | 17.07     | 12.42     | 37.47      | 17.91    | 41.53     |
| 150           | 104.01             | 31.99    | 0.33       | 2.39    | 0.09      | 1.44       | 0.88     | 11.94       | 14.10     | 14.08     | 35.68      | 17.28    | 39.64     |

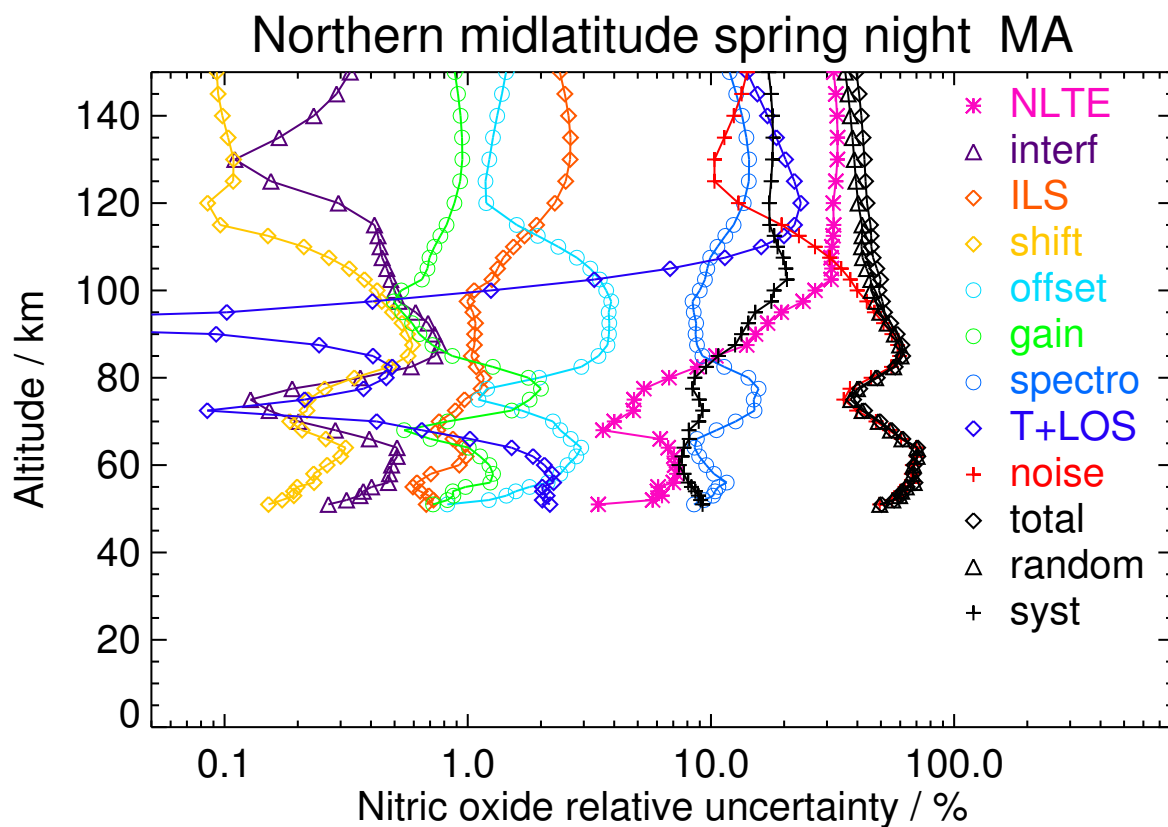

**Figure S80.** V8R\_NO\_561 Northern midlatitude spring night

**Table S82.** Nitric oxide error budget for Northern midlatitude summer day. All uncertainties are  $1\sigma$ .

| altitude (km) | mean target (ppmv) | NLTE (%) | interf (%) | ILS (%) | shift (%) | offset (%) | gain (%) | spectro (%) | T+LOS (%) | noise (%) | random (%) | syst (%) | total (%) |
|---------------|--------------------|----------|------------|---------|-----------|------------|----------|-------------|-----------|-----------|------------|----------|-----------|
| 20            | 0.00               | 1.49     | 0.44       | 0.38    | 0.13      | 0.48       | 2.02     | 6.89        | 0.98      | 23.77     | 23.96      | 6.81     | 24.91     |
| 30            | 0.01               | 7.98     | 0.16       | 2.16    | 0.27      | 0.87       | 3.67     | 11.79       | 1.49      | 20.45     | 20.77      | 14.51    | 25.34     |
| 40            | 0.01               | 3.59     | 0.12       | 0.70    | 0.27      | 0.52       | 1.84     | 9.43        | 0.94      | 16.94     | 17.15      | 9.98     | 19.85     |
| 50            | 0.01               | 1.39     | 0.08       | 0.84    | 0.07      | 0.27       | 1.43     | 8.41        | 0.67      | 20.14     | 20.32      | 8.29     | 21.94     |
| 60            | 0.01               | 8.65     | 0.30       | 1.24    | 0.24      | 1.90       | 0.86     | 9.05        | 2.47      | 55.03     | 55.62      | 10.18    | 56.54     |
| 70            | 0.01               | 14.51    | 0.39       | 1.92    | 0.48      | 2.58       | 1.07     | 9.59        | 0.49      | 57.48     | 57.86      | 16.44    | 60.15     |
| 80            | 0.02               | 21.26    | 0.40       | 1.33    | 0.42      | 3.15       | 0.53     | 7.54        | 1.50      | 54.17     | 56.06      | 17.74    | 58.80     |
| 90            | 0.85               | 25.24    | 0.39       | 1.67    | 0.62      | 3.63       | 0.78     | 9.53        | 1.42      | 45.49     | 49.73      | 18.52    | 53.07     |
| 100           | 9.51               | 17.61    | 0.34       | 1.46    | 0.49      | 3.24       | 0.85     | 7.19        | 1.20      | 32.82     | 34.45      | 16.34    | 38.13     |
| 110           | 34.27              | 15.33    | 0.41       | 1.62    | 0.23      | 1.98       | 0.71     | 7.75        | 21.86     | 22.54     | 32.63      | 14.95    | 35.89     |
| 120           | 60.30              | 21.38    | 0.24       | 1.70    | 0.16      | 1.12       | 0.62     | 8.90        | 24.08     | 9.37      | 28.64      | 19.70    | 34.76     |
| 130           | 107.94             | 26.70    | 0.08       | 1.73    | 0.27      | 1.14       | 1.01     | 9.66        | 20.29     | 8.27      | 27.39      | 23.27    | 35.94     |
| 140           | 176.86             | 29.28    | 0.18       | 1.72    | 0.29      | 1.21       | 1.26     | 9.87        | 17.44     | 10.35     | 27.69      | 24.61    | 37.04     |
| 150           | 236.21             | 30.10    | 0.27       | 1.63    | 0.28      | 1.31       | 1.39     | 9.54        | 14.51     | 12.42     | 27.44      | 24.80    | 36.99     |

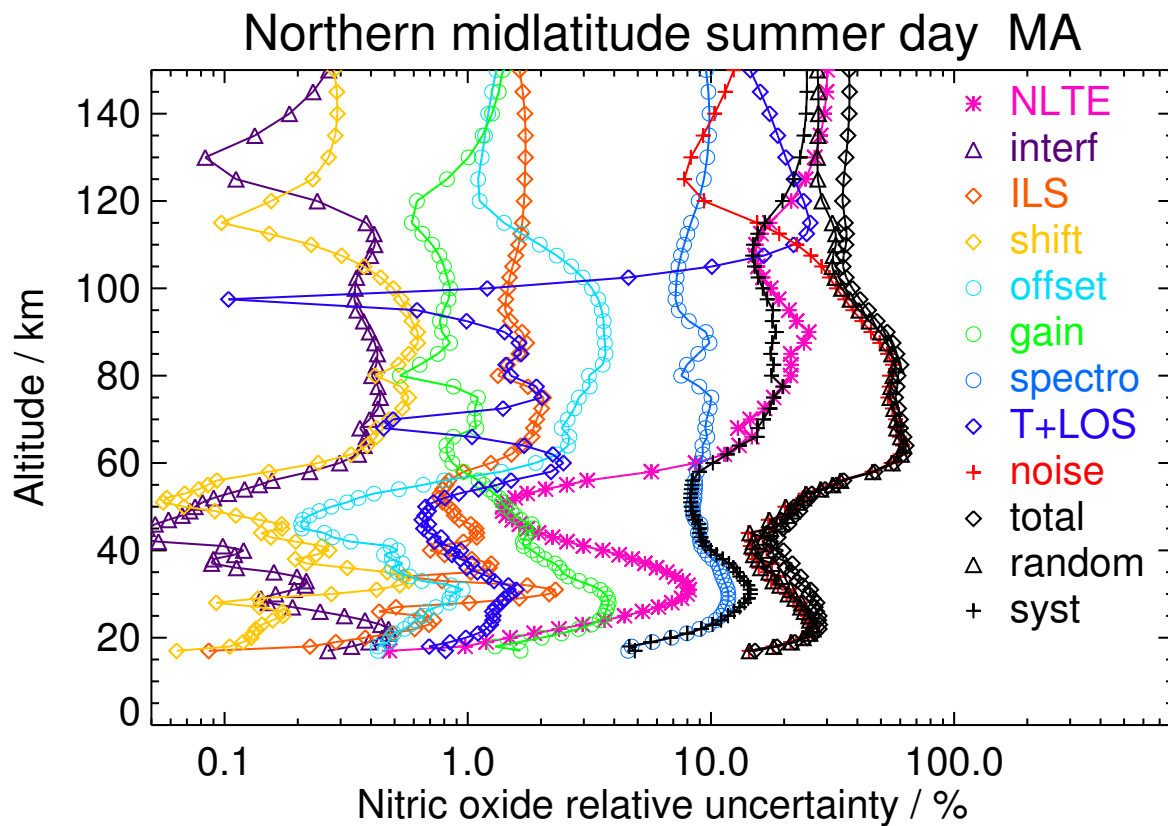

**Figure S81.** V8R\_NO\_561 Northern midlatitude summer day

**Table S83.** Nitric oxide error budget for Northern midlatitude summer night. All uncertainties are  $1\sigma$ .

| altitude (km) | mean target (ppmv) | NLTE (%) | interf (%) | ILS (%) | shift (%) | offset (%) | gain (%) | spectro (%) | T+LOS (%) | noise (%) | random (%) | syst (%) | total (%) |
|---------------|--------------------|----------|------------|---------|-----------|------------|----------|-------------|-----------|-----------|------------|----------|-----------|
| 40            | 0.00               | 1.29     | 0.64       | 0.09    | 0.15      | 0.52       | 0.32     | 0.70        | 1.31      | 37.86     | 37.91      | 1.04     | 37.92     |
| 50            | 0.00               | 2.63     | 0.41       | 0.32    | 0.30      | 1.01       | 2.42     | 3.66        | 2.26      | 34.14     | 34.38      | 4.00     | 34.62     |
| 60            | 0.00               | 5.77     | 0.56       | 0.86    | 0.40      | 2.26       | 1.37     | 8.67        | 1.97      | 61.73     | 62.33      | 6.75     | 62.70     |
| 70            | 0.01               | 6.26     | 0.67       | 1.20    | 0.67      | 2.72       | 0.44     | 7.31        | 0.04      | 62.32     | 62.59      | 8.28     | 63.13     |
| 80            | 0.04               | 14.83    | 0.84       | 1.15    | 1.03      | 3.42       | 0.49     | 6.93        | 1.37      | 60.95     | 62.02      | 12.38    | 63.24     |
| 90            | 1.07               | 15.76    | 0.82       | 1.57    | 1.03      | 3.65       | 0.64     | 9.29        | 0.91      | 47.71     | 49.93      | 11.68    | 51.28     |
| 100           | 9.23               | 14.89    | 0.70       | 1.98    | 0.72      | 3.14       | 1.28     | 10.70       | 3.70      | 31.80     | 34.71      | 13.15    | 37.12     |
| 110           | 27.38              | 18.80    | 0.53       | 1.92    | 0.21      | 1.64       | 0.98     | 10.50       | 22.42     | 18.25     | 32.25      | 16.33    | 36.15     |
| 120           | 44.68              | 27.45    | 0.17       | 1.95    | 0.17      | 1.29       | 0.76     | 10.88       | 25.01     | 10.26     | 34.63      | 20.24    | 40.11     |
| 130           | 55.02              | 29.40    | 0.41       | 1.94    | 0.20      | 1.82       | 0.94     | 10.47       | 22.38     | 15.28     | 35.77      | 20.91    | 41.43     |
| 140           | 71.19              | 27.91    | 0.51       | 1.84    | 0.19      | 1.89       | 1.00     | 9.58        | 19.82     | 16.92     | 33.99      | 20.08    | 39.47     |
| 150           | 84.42              | 25.43    | 0.53       | 1.68    | 0.18      | 1.84       | 0.98     | 8.50        | 16.97     | 17.09     | 30.99      | 18.61    | 36.15     |

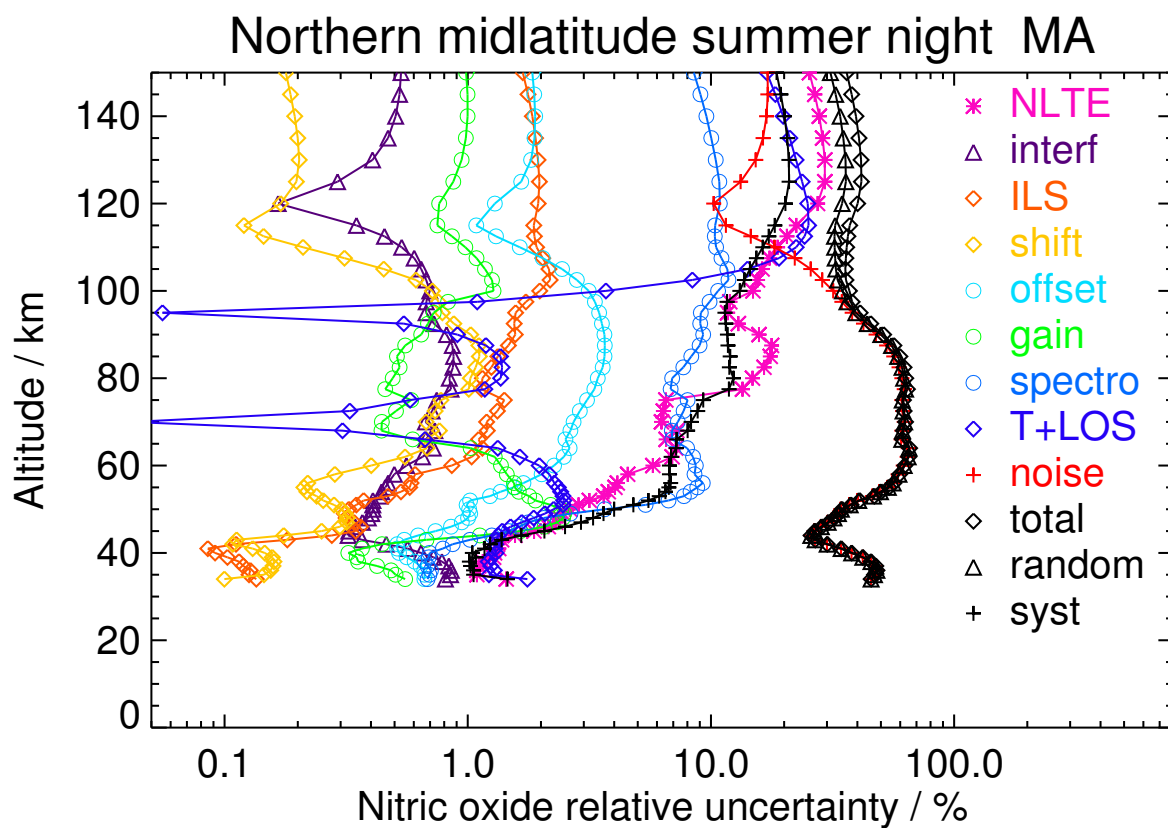

**Figure S82.** V8R\_NO\_561 Northern midlatitude summer night

**Table S84.** Nitric oxide error budget for Northern midlatitude autumn day. All uncertainties are  $1\sigma$ .

| altitude (km) | mean target (ppmv) | NLTE (%) | interf (%) | ILS (%) | shift (%) | offset (%) | gain (%) | spectro (%) | T+LOS (%) | noise (%) | random (%) | syst (%) | total (%) |
|---------------|--------------------|----------|------------|---------|-----------|------------|----------|-------------|-----------|-----------|------------|----------|-----------|
| 20            | 0.00               | 1.50     | 0.36       | 0.10    | 0.17      | 0.46       | 0.99     | 4.66        | 0.71      | 24.17     | 24.24      | 4.78     | 24.70     |
| 30            | 0.01               | 9.47     | 0.17       | 1.72    | 0.35      | 1.04       | 3.80     | 11.66       | 1.51      | 24.73     | 25.18      | 14.97    | 29.29     |
| 40            | 0.01               | 5.67     | 0.10       | 1.23    | 0.36      | 0.70       | 2.42     | 10.36       | 1.10      | 19.61     | 20.07      | 11.42    | 23.09     |
| 50            | 0.01               | 1.79     | 0.07       | 1.16    | 0.08      | 0.37       | 1.58     | 9.14        | 0.78      | 25.24     | 25.49      | 8.87     | 26.99     |
| 60            | 0.00               | 9.71     | 0.19       | 1.74    | 0.13      | 2.08       | 1.02     | 11.51       | 1.30      | 60.35     | 61.46      | 10.09    | 62.28     |
| 70            | 0.01               | 10.90    | 0.23       | 1.66    | 0.20      | 2.58       | 0.59     | 9.24        | 0.09      | 64.79     | 65.38      | 11.71    | 66.42     |
| 80            | 0.04               | 12.98    | 0.34       | 1.64    | 0.30      | 3.46       | 0.69     | 9.37        | 0.42      | 68.22     | 68.98      | 12.92    | 70.18     |
| 90            | 0.50               | 16.38    | 0.36       | 1.86    | 0.32      | 3.82       | 0.81     | 9.76        | 0.35      | 55.57     | 57.05      | 14.69    | 58.91     |
| 100           | 3.91               | 17.84    | 0.30       | 1.92    | 0.29      | 3.49       | 0.85     | 9.51        | 0.47      | 37.84     | 40.28      | 15.34    | 43.10     |
| 110           | 21.48              | 18.64    | 0.31       | 1.85    | 0.18      | 2.70       | 0.72     | 9.26        | 8.17      | 30.09     | 33.70      | 16.77    | 37.64     |
| 120           | 27.40              | 21.55    | 0.19       | 2.24    | 0.04      | 1.18       | 0.72     | 11.73       | 20.38     | 14.32     | 31.26      | 15.88    | 35.06     |
| 130           | 50.39              | 23.03    | 0.05       | 2.11    | 0.12      | 1.09       | 0.75     | 11.37       | 18.86     | 9.72      | 28.69      | 17.11    | 33.40     |
| 140           | 81.41              | 22.70    | 0.10       | 1.93    | 0.15      | 1.24       | 0.78     | 10.48       | 16.51     | 10.79     | 26.81      | 17.35    | 31.94     |
| 150           | 112.07             | 21.60    | 0.16       | 1.72    | 0.16      | 1.36       | 0.80     | 9.45        | 14.12     | 12.61     | 25.21      | 16.86    | 30.33     |

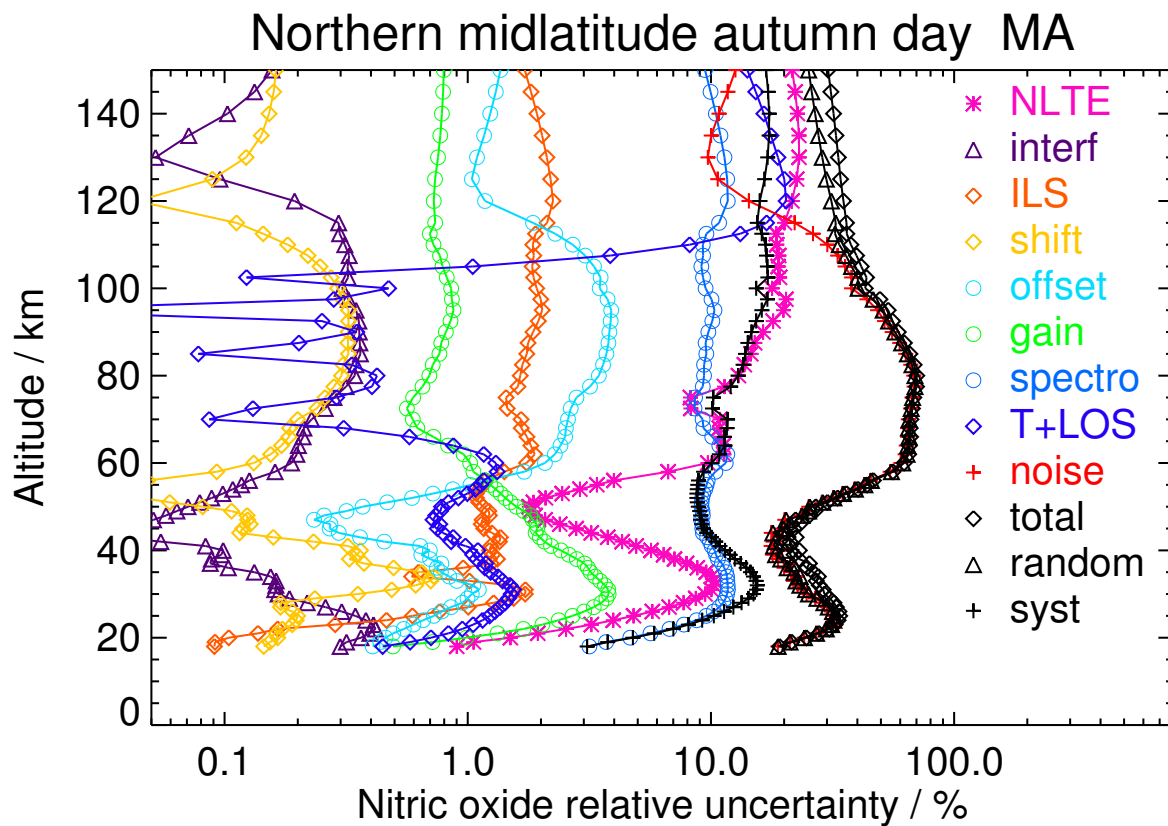

**Figure S83.** V8R\_NO\_561 Northern midlatitude autumn day

**Table S85.** Nitric oxide error budget for Northern midlatitude autumn night. All uncertainties are  $1\sigma$ .

| altitude (km) | mean target (ppmv) | NLTE (%) | interf (%) | ILS (%) | shift (%) | offset (%) | gain (%) | spectro (%) | T+LOS (%) | noise (%) | random (%) | syst (%) | total (%) |
|---------------|--------------------|----------|------------|---------|-----------|------------|----------|-------------|-----------|-----------|------------|----------|-----------|
| 50            | 0.00               | 6.66     | 0.38       | 0.62    | 0.25      | 1.37       | 0.80     | 10.28       | 1.25      | 66.51     | 66.54      | 12.29    | 67.67     |
| 60            | 0.00               | 5.24     | 0.36       | 1.07    | 0.16      | 2.38       | 0.95     | 12.43       | 3.24      | 77.30     | 77.94      | 9.99     | 78.58     |
| 70            | 0.07               | 1.68     | 0.08       | 0.86    | 0.15      | 1.47       | 2.17     | 11.61       | 0.28      | 32.97     | 34.31      | 7.43     | 35.11     |
| 80            | 0.06               | 6.78     | 0.28       | 0.54    | 0.26      | 2.29       | 1.04     | 8.80        | 0.26      | 55.70     | 56.19      | 8.70     | 56.86     |
| 90            | 0.37               | 9.87     | 0.37       | 1.12    | 0.26      | 2.94       | 0.67     | 8.70        | 1.55      | 49.20     | 49.77      | 11.38    | 51.06     |
| 100           | 2.31               | 7.45     | 0.19       | 1.49    | 0.09      | 2.58       | 0.42     | 9.43        | 1.88      | 36.04     | 36.19      | 12.11    | 38.16     |
| 110           | 9.17               | 11.71    | 0.19       | 1.33    | 0.11      | 1.87       | 0.70     | 9.23        | 13.06     | 25.58     | 29.91      | 12.59    | 32.45     |
| 120           | 13.98              | 16.55    | 0.15       | 1.55    | 0.12      | 1.98       | 0.68     | 9.61        | 17.30     | 25.81     | 33.85      | 13.87    | 36.58     |
| 130           | 19.20              | 18.27    | 0.20       | 1.61    | 0.16      | 2.07       | 0.75     | 9.67        | 16.66     | 24.02     | 33.27      | 13.49    | 35.90     |
| 140           | 25.33              | 18.38    | 0.24       | 1.59    | 0.16      | 2.07       | 0.77     | 9.33        | 15.35     | 23.26     | 32.28      | 12.92    | 34.77     |
| 150           | 30.50              | 17.37    | 0.25       | 1.50    | 0.15      | 1.98       | 0.74     | 8.59        | 13.52     | 21.97     | 30.07      | 11.99    | 32.37     |

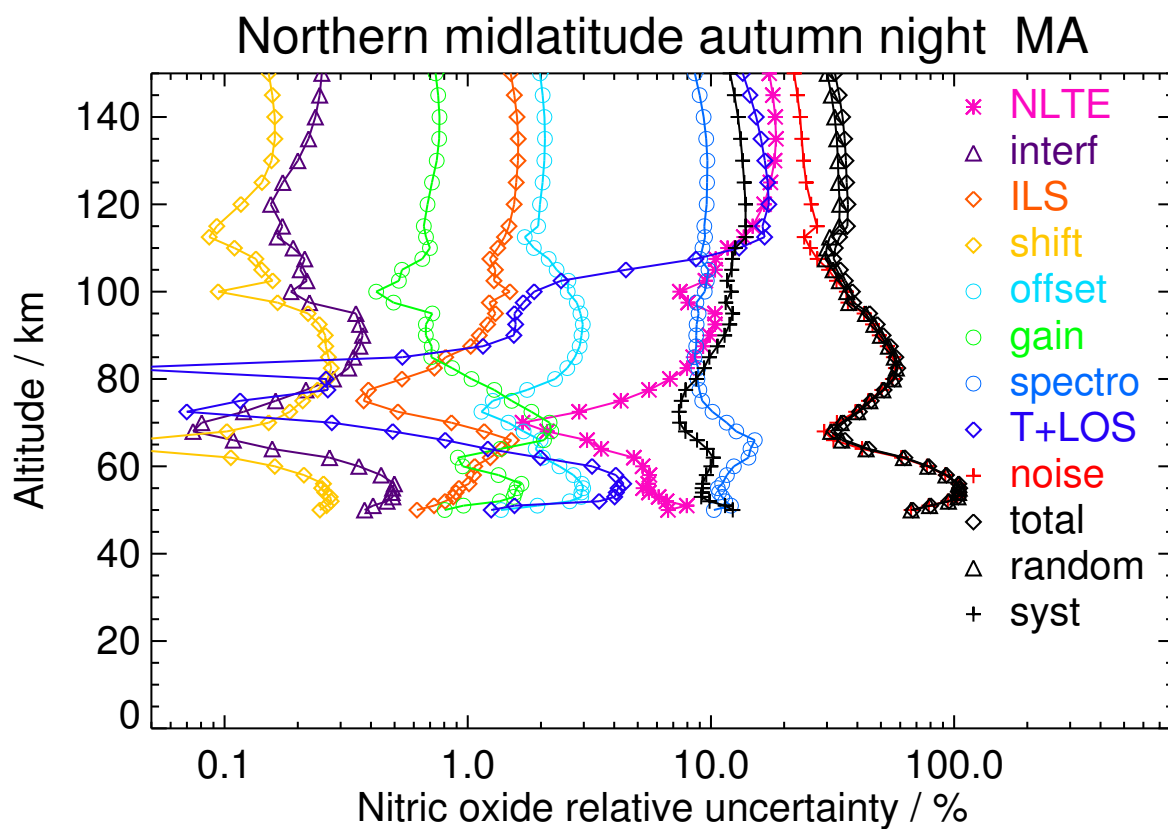

**Figure S84.** V8R\_NO\_561 Northern midlatitude autumn night



**Table S86.** Nitric oxide error budget for Tropics day. All uncertainties are  $1\sigma$ .

| altitude (km) | mean target (ppmv) | NLTE (%) | interf (%) | ILS (%) | shift (%) | offset (%) | gain (%) | spectro (%) | T+LOS (%) | noise (%) | random (%) | syst (%) | total (%) |
|---------------|--------------------|----------|------------|---------|-----------|------------|----------|-------------|-----------|-----------|------------|----------|-----------|
| 20            | 0.00               | 3.22     | 0.12       | 1.47    | 0.09      | 0.84       | 0.22     | 3.99        | 0.55      | 24.45     | 24.66      | 4.42     | 25.05     |
| 30            | 0.00               | 9.70     | 0.18       | 3.04    | 0.27      | 0.98       | 2.02     | 12.62       | 1.36      | 30.09     | 30.59      | 15.46    | 34.28     |
| 40            | 0.01               | 4.24     | 0.09       | 0.75    | 0.37      | 0.55       | 2.11     | 9.44        | 1.12      | 13.81     | 14.16      | 10.20    | 17.45     |
| 50            | 0.01               | 1.26     | 0.07       | 1.24    | 0.08      | 0.22       | 1.52     | 8.99        | 0.67      | 19.87     | 20.03      | 8.97     | 21.95     |
| 60            | 0.00               | 8.36     | 0.18       | 2.01    | 0.32      | 2.33       | 0.56     | 10.49       | 1.18      | 63.21     | 63.68      | 11.50    | 64.71     |
| 70            | 0.01               | 11.87    | 0.20       | 2.67    | 0.44      | 3.17       | 0.69     | 11.14       | 0.02      | 67.85     | 68.34      | 14.70    | 69.91     |
| 80            | 0.02               | 14.45    | 0.26       | 2.66    | 0.56      | 4.15       | 1.15     | 10.35       | 0.56      | 66.27     | 66.74      | 16.71    | 68.80     |
| 90            | 0.37               | 18.02    | 0.27       | 2.57    | 0.59      | 4.60       | 1.31     | 9.93        | 0.66      | 55.99     | 56.89      | 18.77    | 59.91     |
| 100           | 3.86               | 20.45    | 0.26       | 2.40    | 0.53      | 4.26       | 1.24     | 9.06        | 0.25      | 45.12     | 46.80      | 19.29    | 50.62     |
| 110           | 16.34              | 16.63    | 0.22       | 2.29    | 0.32      | 2.79       | 0.94     | 9.16        | 11.85     | 30.63     | 34.33      | 16.57    | 38.12     |
| 120           | 26.12              | 15.42    | 0.11       | 2.03    | 0.06      | 1.07       | 0.60     | 9.54        | 19.79     | 11.61     | 24.34      | 16.40    | 29.34     |
| 130           | 51.32              | 17.97    | 0.04       | 1.79    | 0.15      | 1.15       | 0.63     | 9.45        | 16.32     | 8.19      | 20.38      | 18.31    | 27.40     |
| 140           | 87.91              | 18.72    | 0.07       | 1.63    | 0.18      | 1.24       | 0.72     | 9.06        | 13.72     | 9.57      | 19.07      | 18.80    | 26.78     |
| 150           | 117.73             | 18.59    | 0.11       | 1.46    | 0.19      | 1.26       | 0.78     | 8.41        | 11.30     | 11.21     | 18.27      | 18.44    | 25.96     |

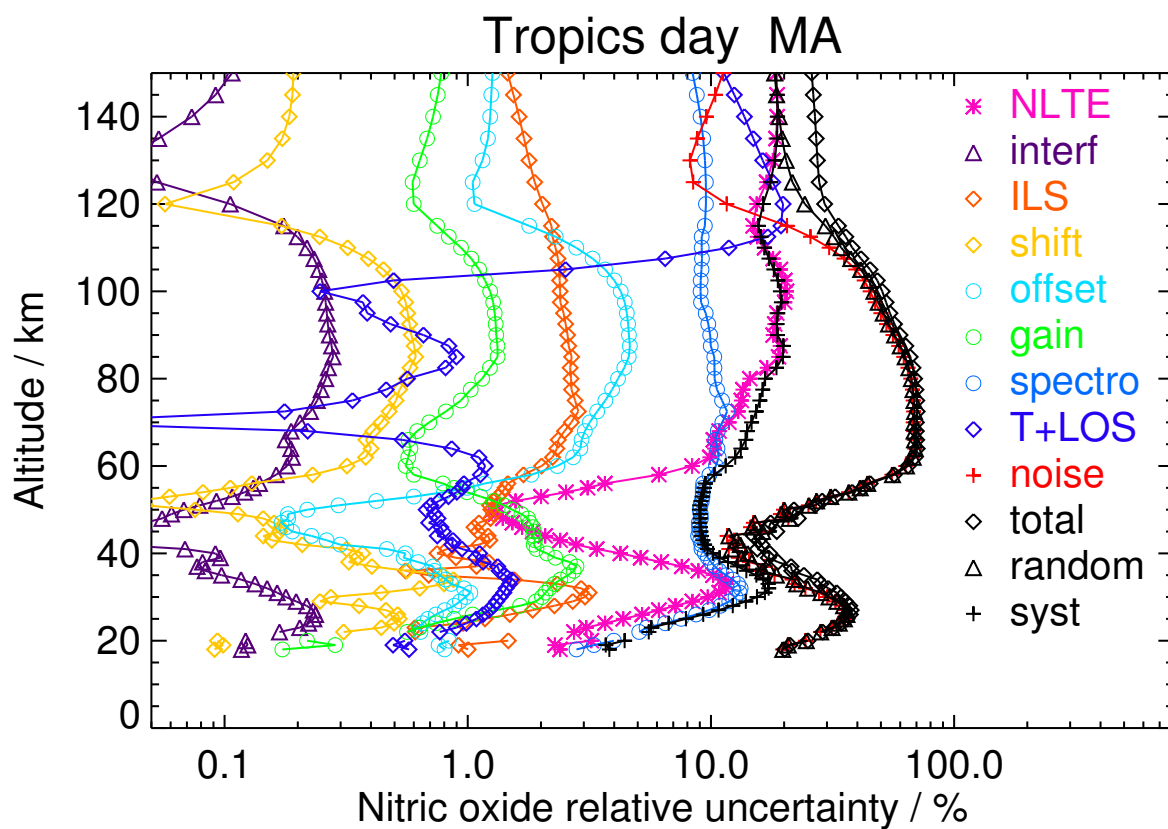

**Figure S85.** V8R\_NO\_561 Tropics day

**Table S87.** Nitric oxide error budget for Tropics night. All uncertainties are  $1\sigma$ .

| altitude (km) | mean target (ppmv) | NLTE (%) | interf (%) | ILS (%) | shift (%) | offset (%) | gain (%) | spectro (%) | T+LOS (%) | noise (%) | random (%) | syst (%) | total (%) |
|---------------|--------------------|----------|------------|---------|-----------|------------|----------|-------------|-----------|-----------|------------|----------|-----------|
| 60            | 0.00               | 6.34     | 0.52       | 2.10    | 0.28      | 2.71       | 2.07     | 12.42       | 2.25      | 80.85     | 81.41      | 11.20    | 82.18     |
| 90            | 0.20               | 10.47    | 0.31       | 2.25    | 0.43      | 3.20       | 0.95     | 10.20       | 0.72      | 46.46     | 47.05      | 13.23    | 48.88     |
| 100           | 1.67               | 12.30    | 0.25       | 2.30    | 0.33      | 2.85       | 0.81     | 10.56       | 0.63      | 35.72     | 36.51      | 14.85    | 39.42     |
| 110           | 7.14               | 13.99    | 0.15       | 2.25    | 0.15      | 1.99       | 0.74     | 10.68       | 9.14      | 26.46     | 29.39      | 15.46    | 33.21     |
| 120           | 12.68              | 14.58    | 0.11       | 2.00    | 0.16      | 2.06       | 0.63     | 9.58        | 17.94     | 23.50     | 30.93      | 15.17    | 34.45     |
| 130           | 17.08              | 13.81    | 0.15       | 1.80    | 0.22      | 2.24       | 0.58     | 8.60        | 16.53     | 23.31     | 29.78      | 14.25    | 33.02     |
| 140           | 22.55              | 12.82    | 0.16       | 1.66    | 0.22      | 2.21       | 0.54     | 7.85        | 14.90     | 22.54     | 28.05      | 13.32    | 31.05     |
| 150           | 25.20              | 11.63    | 0.16       | 1.51    | 0.21      | 2.07       | 0.50     | 7.07        | 12.95     | 20.93     | 25.50      | 12.16    | 28.25     |

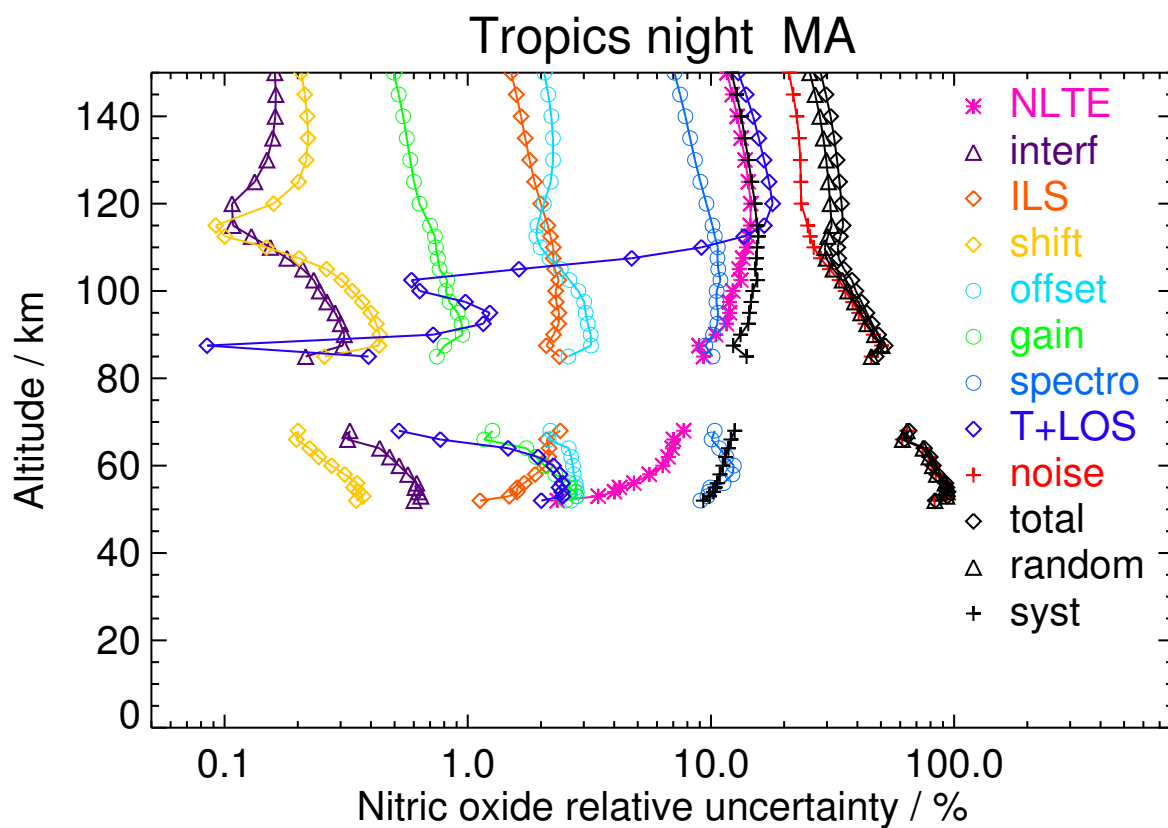

**Figure S86.** V8R\_NO\_561 Tropics night

**Table S88.** Nitric oxide error budget for Southern midlatitude winter day. All uncertainties are  $1\sigma$ .

| altitude (km) | mean target (ppmv) | NLTE (%) | interf (%) | ILS (%) | shift (%) | offset (%) | gain (%) | spectro (%) | T+LOS (%) | noise (%) | random (%) | syst (%) | total (%) |
|---------------|--------------------|----------|------------|---------|-----------|------------|----------|-------------|-----------|-----------|------------|----------|-----------|
| 20            | 0.00               | 2.55     | 0.38       | 0.26    | 0.10      | 0.51       | 1.72     | 5.55        | 0.91      | 23.98     | 24.22      | 5.51     | 24.83     |
| 30            | 0.00               | 14.15    | 0.31       | 1.57    | 0.47      | 1.35       | 4.34     | 13.59       | 1.72      | 30.62     | 32.55      | 17.03    | 36.73     |
| 40            | 0.01               | 8.23     | 0.09       | 2.01    | 0.32      | 0.71       | 2.58     | 12.21       | 1.11      | 25.11     | 26.68      | 12.15    | 29.32     |
| 50            | 0.01               | 1.89     | 0.09       | 1.03    | 0.07      | 0.39       | 1.30     | 8.66        | 1.00      | 30.83     | 31.05      | 8.34     | 32.15     |
| 60            | 0.01               | 6.75     | 0.19       | 1.19    | 0.33      | 1.88       | 0.64     | 8.64        | 2.23      | 56.37     | 56.81      | 9.04     | 57.52     |
| 70            | 0.02               | 11.11    | 0.22       | 1.48    | 0.37      | 2.30       | 0.75     | 8.57        | 0.04      | 57.60     | 58.22      | 11.52    | 59.35     |
| 80            | 0.07               | 13.62    | 0.26       | 1.33    | 0.39      | 2.66       | 0.80     | 8.52        | 0.83      | 53.24     | 53.92      | 13.98    | 55.70     |
| 90            | 0.87               | 17.25    | 0.25       | 1.36    | 0.39      | 3.20       | 0.73     | 8.30        | 0.13      | 44.18     | 45.38      | 16.49    | 48.28     |
| 100           | 8.59               | 17.72    | 0.22       | 1.44    | 0.29      | 3.21       | 0.60     | 8.56        | 0.60      | 33.56     | 35.26      | 16.84    | 39.08     |
| 110           | 45.66              | 15.00    | 0.25       | 1.72    | 0.10      | 1.89       | 0.77     | 9.85        | 21.55     | 21.04     | 32.22      | 14.08    | 35.16     |
| 120           | 75.07              | 18.77    | 0.17       | 1.91    | 0.10      | 1.21       | 0.65     | 10.38       | 31.99     | 10.82     | 36.46      | 16.62    | 40.07     |
| 130           | 100.85             | 20.77    | 0.07       | 1.75    | 0.11      | 1.30       | 0.62     | 9.64        | 24.21     | 9.43      | 29.18      | 18.80    | 34.71     |
| 140           | 135.70             | 21.39    | 0.15       | 1.64    | 0.10      | 1.36       | 0.60     | 9.11        | 19.32     | 11.10     | 25.85      | 19.33    | 32.28     |
| 150           | 173.47             | 21.14    | 0.20       | 1.50    | 0.09      | 1.42       | 0.58     | 8.32        | 15.32     | 12.81     | 23.59      | 19.06    | 30.33     |

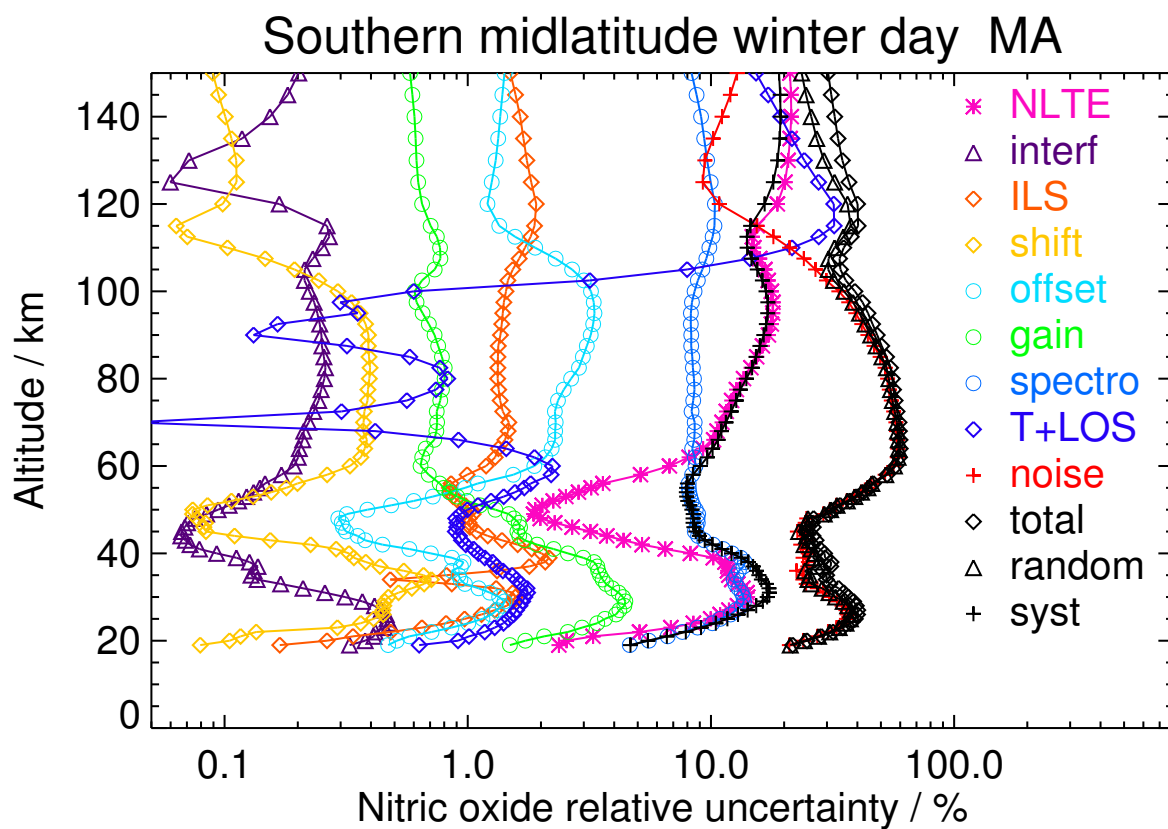

**Figure S87.** V8R\_NO\_561 Southern midlatitude winter day

**Table S89.** Nitric oxide error budget for Southern midlatitude winter night. All uncertainties are  $1\sigma$ .

| altitude (km) | mean target (ppmv) | NLTE (%) | interf (%) | ILS (%) | shift (%) | offset (%) | gain (%) | spectro (%) | T+LOS (%) | noise (%) | random (%) | syst (%) | total (%) |
|---------------|--------------------|----------|------------|---------|-----------|------------|----------|-------------|-----------|-----------|------------|----------|-----------|
| 50            | 0.00               | 5.92     | 0.26       | 1.14    | 0.24      | 1.00       | 0.38     | 11.36       | 1.56      | 49.75     | 50.30      | 10.67    | 51.42     |
| 60            | 0.01               | 8.73     | 0.27       | 0.74    | 0.21      | 2.27       | 1.59     | 12.81       | 2.93      | 57.31     | 58.73      | 9.58     | 59.51     |
| 70            | 0.04               | 12.39    | 0.19       | 1.91    | 0.23      | 2.12       | 1.89     | 15.32       | 0.59      | 53.57     | 56.04      | 11.35    | 57.18     |
| 80            | 0.19               | 13.40    | 0.23       | 2.49    | 0.30      | 2.16       | 1.54     | 16.11       | 0.89      | 50.05     | 52.82      | 12.93    | 54.38     |
| 90            | 1.57               | 14.43    | 0.26       | 1.56    | 0.37      | 2.94       | 0.95     | 10.96       | 0.66      | 43.96     | 45.75      | 13.45    | 47.68     |
| 100           | 11.37              | 19.43    | 0.32       | 1.26    | 0.49      | 3.07       | 0.92     | 10.59       | 5.80      | 33.72     | 38.15      | 14.74    | 40.90     |
| 110           | 43.27              | 15.81    | 0.25       | 1.37    | 0.19      | 1.91       | 0.63     | 9.26        | 29.00     | 22.56     | 38.88      | 13.43    | 41.13     |
| 120           | 73.83              | 20.32    | 0.13       | 1.69    | 0.10      | 1.12       | 0.71     | 9.93        | 31.70     | 11.48     | 37.02      | 16.82    | 40.66     |
| 130           | 89.28              | 24.62    | 0.11       | 1.96    | 0.14      | 1.39       | 0.80     | 10.80       | 24.62     | 12.04     | 33.40      | 19.10    | 38.48     |
| 140           | 101.42             | 27.24    | 0.17       | 2.13    | 0.16      | 1.45       | 0.90     | 11.44       | 19.82     | 13.36     | 32.56      | 19.79    | 38.10     |
| 150           | 110.32             | 28.08    | 0.23       | 2.16    | 0.15      | 1.45       | 0.96     | 11.26       | 15.81     | 14.17     | 31.58      | 19.40    | 37.07     |

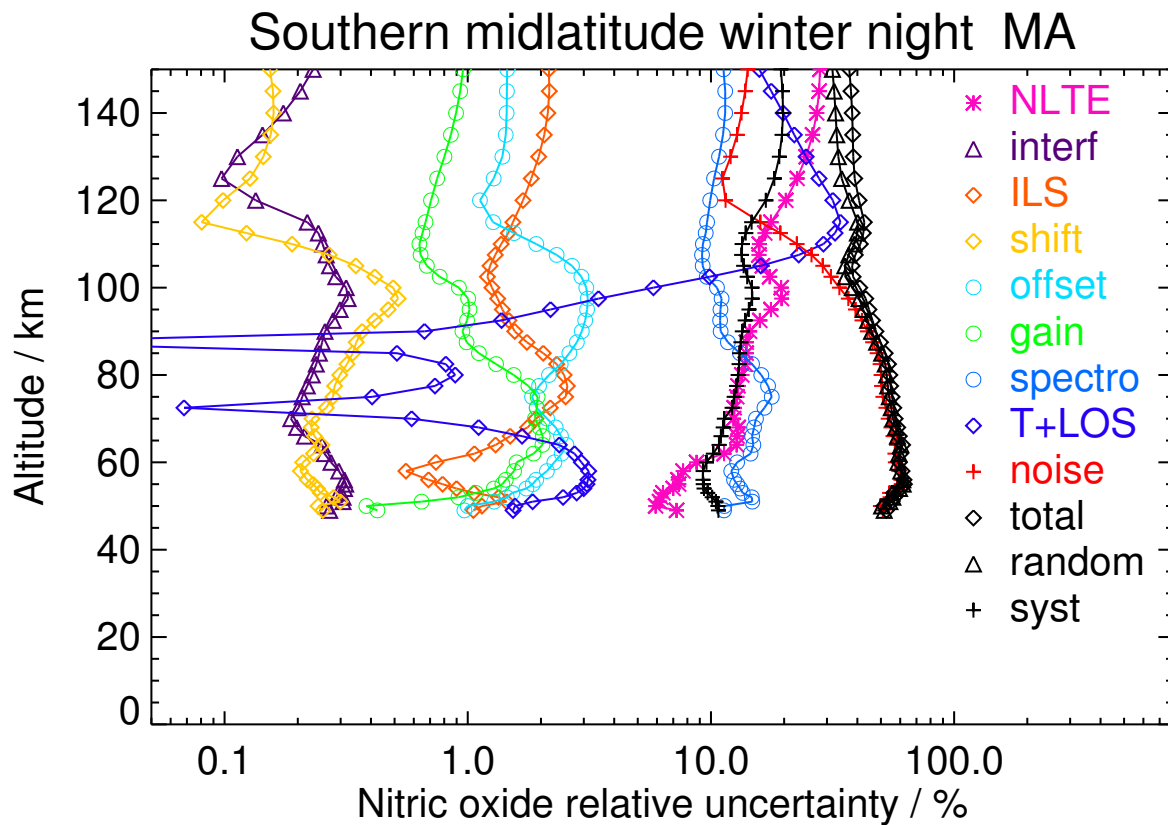

**Figure S88.** V8R\_NO\_561 Southern midlatitude winter night

**Table S90.** Nitric oxide error budget for Southern midlatitude spring day. All uncertainties are  $1\sigma$ .

| altitude (km) | mean target (ppmv) | NLTE (%) | interf (%) | ILS (%) | shift (%) | offset (%) | gain (%) | spectro (%) | T+LOS (%) | noise (%) | random (%) | syst (%) | total (%) |
|---------------|--------------------|----------|------------|---------|-----------|------------|----------|-------------|-----------|-----------|------------|----------|-----------|
| 20            | 0.00               | 1.59     | 0.40       | 0.51    | 0.15      | 0.49       | 1.36     | 5.63        | 0.75      | 23.15     | 23.40      | 5.04     | 23.94     |
| 30            | 0.00               | 8.30     | 0.14       | 1.57    | 0.38      | 0.80       | 3.14     | 10.70       | 1.30      | 21.14     | 21.74      | 13.14    | 25.40     |
| 40            | 0.01               | 4.86     | 0.07       | 1.18    | 0.26      | 0.47       | 1.89     | 9.91        | 0.94      | 19.85     | 20.18      | 10.71    | 22.85     |
| 50            | 0.01               | 1.70     | 0.09       | 1.06    | 0.08      | 0.31       | 1.31     | 8.46        | 0.73      | 27.32     | 27.48      | 8.33     | 28.72     |
| 60            | 0.01               | 9.56     | 0.28       | 1.46    | 0.51      | 1.99       | 0.75     | 10.55       | 1.66      | 57.20     | 58.07      | 10.60    | 59.03     |
| 70            | 0.01               | 25.93    | 0.33       | 2.08    | 0.73      | 2.56       | 1.66     | 9.12        | <0.01     | 61.67     | 64.78      | 19.41    | 67.63     |
| 80            | 0.03               | 29.42    | 0.42       | 1.69    | 0.71      | 3.81       | 1.71     | 8.63        | 0.66      | 64.42     | 66.51      | 26.23    | 71.50     |
| 90            | 0.40               | 26.23    | 0.48       | 1.64    | 0.63      | 4.52       | 1.42     | 8.54        | 0.04      | 58.55     | 60.34      | 23.95    | 64.92     |
| 100           | 3.41               | 25.54    | 0.43       | 1.68    | 0.44      | 4.10       | 1.06     | 8.69        | 0.01      | 43.98     | 46.08      | 23.67    | 51.80     |
| 110           | 20.36              | 23.48    | 0.41       | 1.78    | 0.23      | 2.75       | 0.78     | 9.12        | 16.27     | 29.96     | 37.37      | 20.30    | 42.53     |
| 120           | 46.13              | 21.69    | 0.25       | 1.92    | 0.05      | 1.16       | 0.63     | 9.93        | 24.03     | 12.53     | 30.78      | 19.02    | 36.18     |
| 130           | 83.92              | 23.44    | 0.08       | 1.98    | 0.09      | 1.03       | 0.63     | 10.49       | 20.66     | 7.43      | 27.17      | 20.22    | 33.87     |
| 140           | 143.26             | 24.37    | 0.12       | 1.93    | 0.09      | 1.06       | 0.65     | 10.41       | 17.63     | 8.25      | 25.64      | 20.71    | 32.96     |
| 150           | 200.54             | 25.69    | 0.21       | 1.82    | 0.09      | 1.16       | 0.67     | 10.03       | 14.54     | 10.52     | 25.59      | 20.81    | 32.99     |

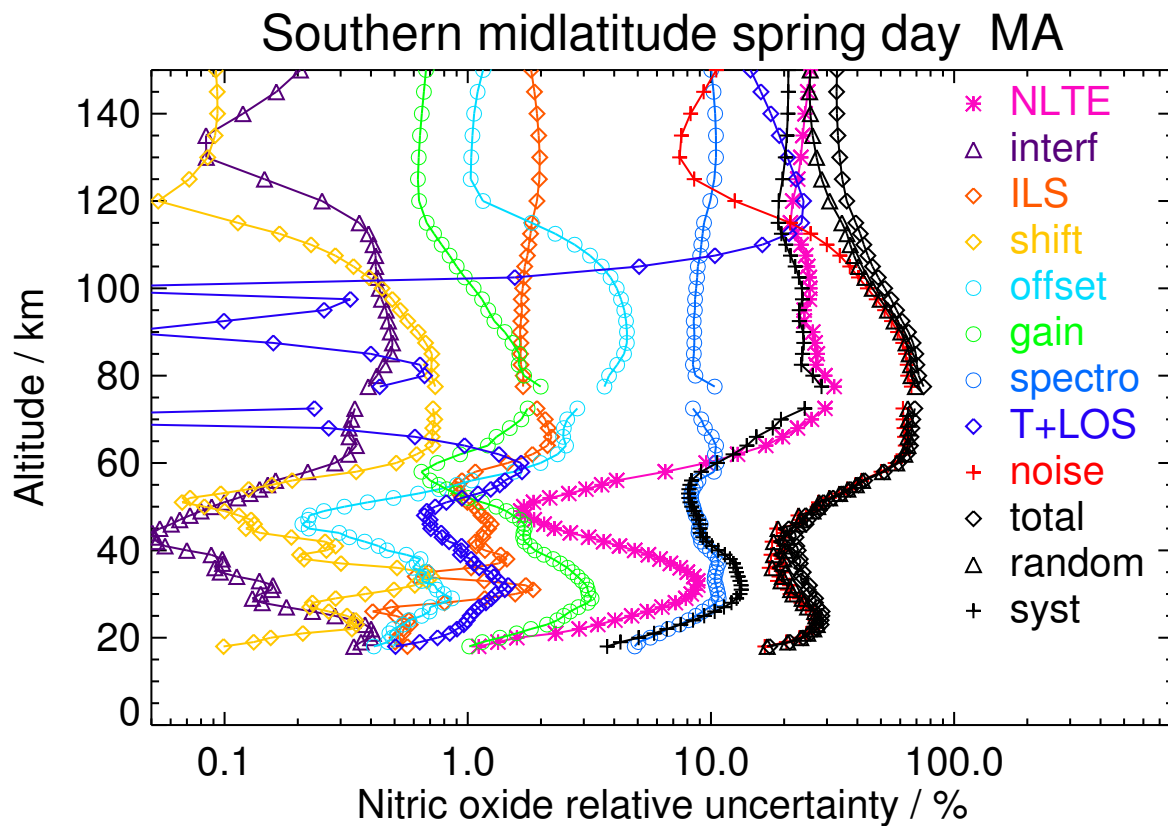

**Figure S89.** V8R\_NO\_561 Southern midlatitude spring day

**Table S91.** Nitric oxide error budget for Southern midlatitude spring night. All uncertainties are  $1\sigma$ .

| altitude (km) | mean target (ppmv) | NLTE (%) | interf (%) | ILS (%) | shift (%) | offset (%) | gain (%) | spectro (%) | T+LOS (%) | noise (%) | random (%) | syst (%) | total (%) |
|---------------|--------------------|----------|------------|---------|-----------|------------|----------|-------------|-----------|-----------|------------|----------|-----------|
| 60            | 0.01               | 6.68     | 0.43       | 1.32    | 0.20      | 2.81       | 2.11     | 14.31       | 2.14      | 73.63     | 74.82      | 9.53     | 75.43     |
| 70            | 0.03               | 12.58    | 0.24       | 2.45    | 0.25      | 1.56       | 2.21     | 15.35       | 0.42      | 46.54     | 49.32      | 11.87    | 50.73     |
| 80            | 0.05               | 11.62    | 0.44       | 1.91    | 0.39      | 2.54       | 1.39     | 12.26       | 0.54      | 53.03     | 54.53      | 11.69    | 55.77     |
| 90            | 0.45               | 17.56    | 0.62       | 1.78    | 0.54      | 3.37       | 0.76     | 11.00       | 0.26      | 50.16     | 52.69      | 13.63    | 54.42     |
| 100           | 4.74               | 20.22    | 0.67       | 1.67    | 0.59      | 3.45       | 0.55     | 10.23       | 0.83      | 36.36     | 40.53      | 14.48    | 43.03     |
| 110           | 17.14              | 14.11    | 0.54       | 1.38    | 0.27      | 1.91       | 0.65     | 9.15        | 24.28     | 23.24     | 35.72      | 11.95    | 37.66     |
| 120           | 24.89              | 21.44    | 0.16       | 1.96    | 0.12      | 1.29       | 0.82     | 11.15       | 23.46     | 13.95     | 32.96      | 15.77    | 36.54     |
| 130           | 34.27              | 23.19    | 0.22       | 2.08    | 0.17      | 1.50       | 0.98     | 11.15       | 19.98     | 13.80     | 31.43      | 16.48    | 35.49     |
| 140           | 45.06              | 23.25    | 0.31       | 2.08    | 0.18      | 1.58       | 1.07     | 10.77       | 17.34     | 14.64     | 30.29      | 16.18    | 34.34     |
| 150           | 53.17              | 21.92    | 0.37       | 1.96    | 0.18      | 1.56       | 1.07     | 9.89        | 14.61     | 14.73     | 28.01      | 15.22    | 31.88     |

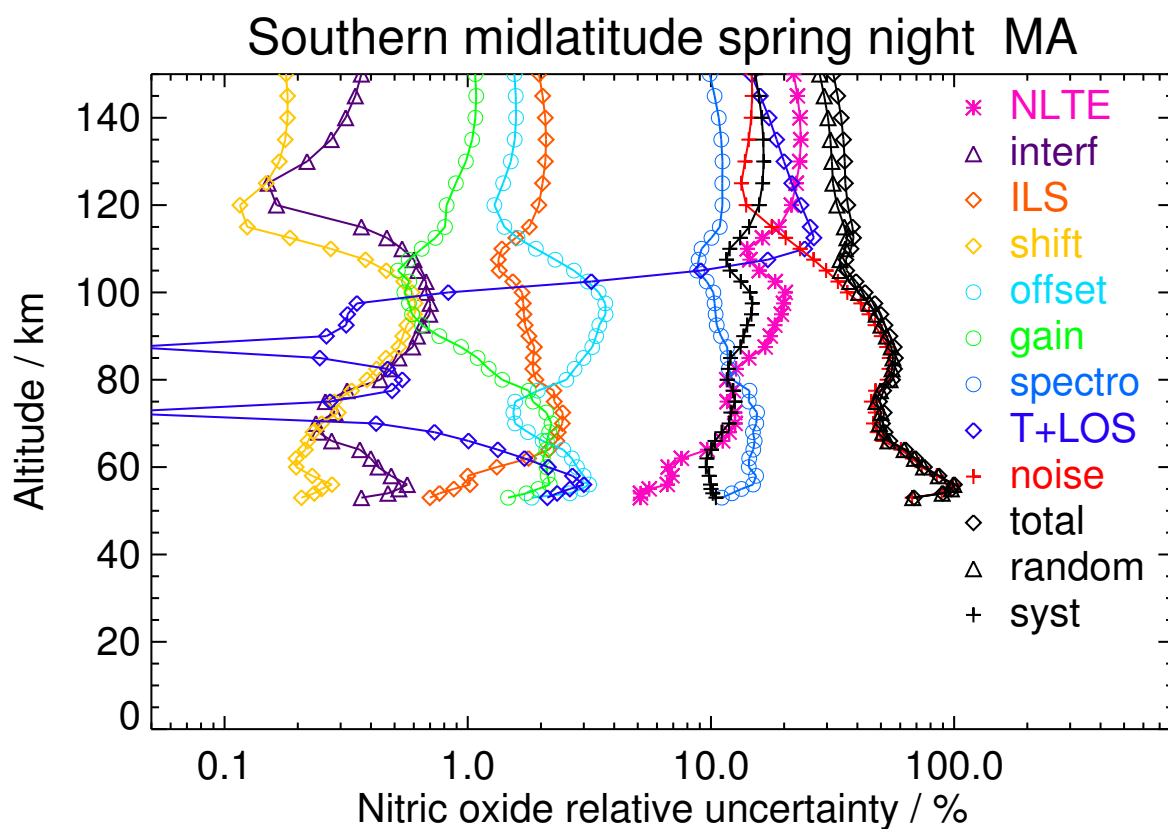

**Figure S90.** V8R\_NO\_561 Southern midlatitude spring night

**Table S92.** Nitric oxide error budget for Southern midlatitude summer day. All uncertainties are  $1\sigma$ .

| altitude (km) | mean target (ppmv) | NLTE (%) | interf (%) | ILS (%) | shift (%) | offset (%) | gain (%) | spectro (%) | T+LOS (%) | noise (%) | random (%) | syst (%) | total (%) |
|---------------|--------------------|----------|------------|---------|-----------|------------|----------|-------------|-----------|-----------|------------|----------|-----------|
| 20            | 0.00               | 1.44     | 0.51       | 0.38    | 0.32      | 0.46       | 0.70     | 4.77        | 1.03      | 23.81     | 23.92      | 4.68     | 24.37     |
| 30            | 0.01               | 7.48     | 0.31       | 2.76    | 0.41      | 0.75       | 2.34     | 10.46       | 1.67      | 20.93     | 21.29      | 12.92    | 24.90     |
| 40            | 0.01               | 3.27     | 0.04       | 0.72    | 0.34      | 0.38       | 1.77     | 8.80        | 1.12      | 13.36     | 13.60      | 9.33     | 16.49     |
| 50            | 0.01               | 1.51     | 0.07       | 0.91    | 0.07      | 0.22       | 1.30     | 8.24        | 0.86      | 18.95     | 19.15      | 8.12     | 20.80     |
| 60            | 0.01               | 10.04    | 0.28       | 1.21    | 0.79      | 1.67       | 1.21     | 8.37        | 2.25      | 51.49     | 52.24      | 10.18    | 53.23     |
| 70            | 0.01               | 25.48    | 0.40       | 2.50    | 1.01      | 2.27       | 1.63     | 11.47       | 0.13      | 53.78     | 57.81      | 18.61    | 60.74     |
| 80            | 0.03               | 33.74    | 0.31       | 1.96    | 0.92      | 2.89       | 1.73     | 11.15       | 1.57      | 52.17     | 55.70      | 30.00    | 63.27     |
| 90            | 0.79               | 35.22    | 0.27       | 1.37    | 0.97      | 3.63       | 1.71     | 9.97        | 0.88      | 46.79     | 52.83      | 27.54    | 59.58     |
| 100           | 8.41               | 34.11    | 0.22       | 1.43    | 0.57      | 3.38       | 0.78     | 10.07       | 1.72      | 33.97     | 41.66      | 26.47    | 49.36     |
| 110           | 38.87              | 29.08    | 0.28       | 2.00    | 0.13      | 2.29       | 0.78     | 9.67        | 26.89     | 21.59     | 40.79      | 21.79    | 46.25     |
| 120           | 73.14              | 28.75    | 0.32       | 2.13    | 0.18      | 1.36       | 0.73     | 9.61        | 28.72     | 11.39     | 36.22      | 23.85    | 43.37     |
| 130           | 116.99             | 31.80    | 0.08       | 1.92    | 0.14      | 1.23       | 0.63     | 9.81        | 21.74     | 7.45      | 30.35      | 26.83    | 40.51     |
| 140           | 190.92             | 32.14    | 0.12       | 1.84    | 0.14      | 1.02       | 0.64     | 9.85        | 17.34     | 7.21      | 27.39      | 27.16    | 38.57     |
| 150           | 260.73             | 33.38    | 0.22       | 1.72    | 0.13      | 1.01       | 0.62     | 9.54        | 13.30     | 9.01      | 26.28      | 27.87    | 38.31     |

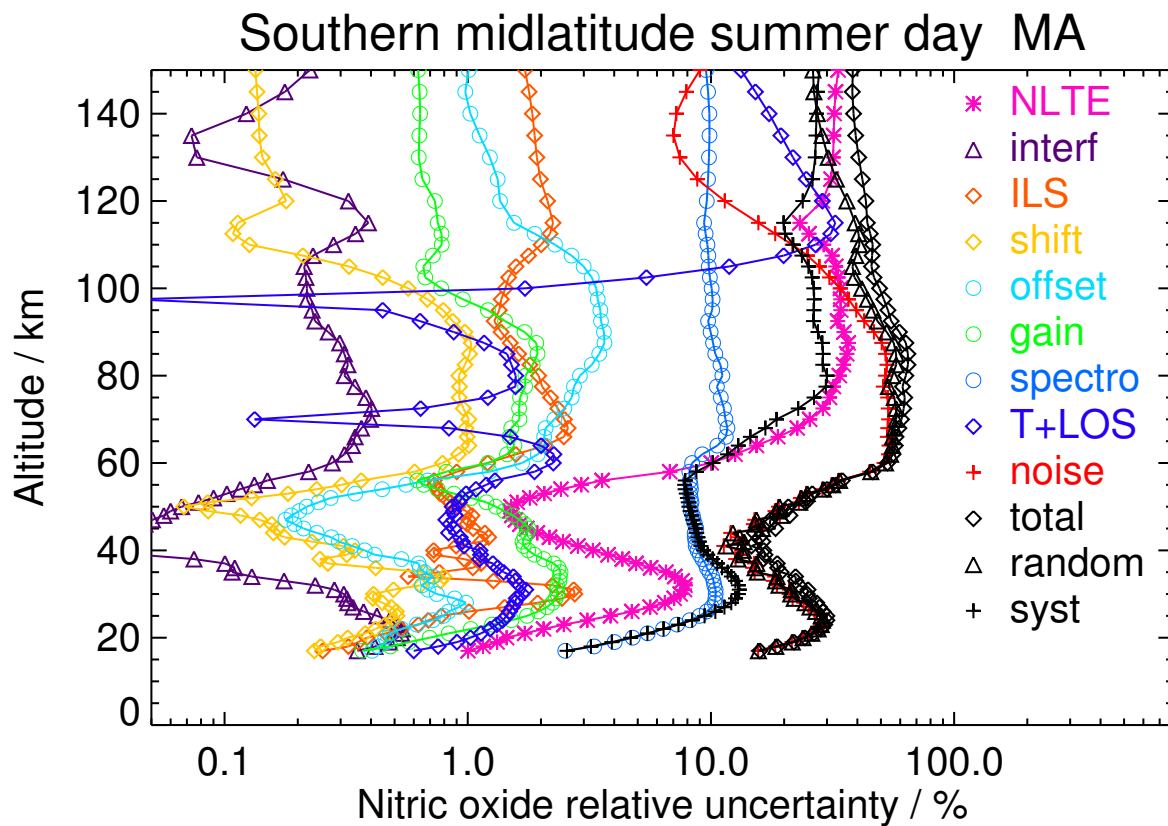

**Figure S91.** V8R\_NO\_561 Southern midlatitude summer day

**Table S93.** Nitric oxide error budget for Southern midlatitude summer night. All uncertainties are  $1\sigma$ .

| altitude (km) | mean target (ppmv) | NLTE (%) | interf (%) | ILS (%) | shift (%) | offset (%) | gain (%) | spectro (%) | T+LOS (%) | noise (%) | random (%) | syst (%) | total (%) |
|---------------|--------------------|----------|------------|---------|-----------|------------|----------|-------------|-----------|-----------|------------|----------|-----------|
| 40            | 0.00               | 0.56     | 0.73       | 0.49    | 0.16      | 0.48       | 0.39     | 0.23        | 0.76      | 41.06     | 41.08      | 0.86     | 41.09     |
| 50            | 0.00               | 4.34     | 0.44       | 0.98    | 0.44      | 1.11       | 3.00     | 4.05        | 2.00      | 31.41     | 31.79      | 5.18     | 32.21     |
| 60            | 0.00               | 14.06    | 0.58       | 1.58    | 0.42      | 2.53       | 1.48     | 12.89       | 3.36      | 65.31     | 66.91      | 13.21    | 68.20     |
| 70            | 0.05               | 10.89    | 0.26       | 1.45    | 0.32      | 1.54       | 1.54     | 10.21       | 0.44      | 41.26     | 41.90      | 13.28    | 43.96     |
| 80            | 0.07               | 19.29    | 0.45       | 1.09    | 0.57      | 2.53       | 1.10     | 10.07       | 1.18      | 49.55     | 50.32      | 20.19    | 54.22     |
| 90            | 1.20               | 29.88    | 0.40       | 1.66    | 0.94      | 3.42       | 0.92     | 13.55       | 0.36      | 42.16     | 48.63      | 22.48    | 53.58     |
| 100           | 9.96               | 24.73    | 0.36       | 1.89    | 0.77      | 3.25       | 0.83     | 11.15       | 6.83      | 33.65     | 39.55      | 19.14    | 43.94     |
| 110           | 45.43              | 23.63    | 0.38       | 1.92    | 0.44      | 1.94       | 0.90     | 9.89        | 32.60     | 21.41     | 43.88      | 16.13    | 46.75     |
| 120           | 104.83             | 28.29    | 0.39       | 1.76    | 0.15      | 1.03       | 0.80     | 9.32        | 32.97     | 10.15     | 41.66      | 18.64    | 45.63     |
| 130           | 115.52             | 37.15    | 0.15       | 2.31    | 0.16      | 1.05       | 1.04     | 12.17       | 21.26     | 8.41      | 37.23      | 25.95    | 45.38     |
| 140           | 143.18             | 40.02    | 0.32       | 2.45    | 0.18      | 1.08       | 1.21     | 12.55       | 16.20     | 10.23     | 36.68      | 28.10    | 46.21     |
| 150           | 161.74             | 40.30    | 0.43       | 2.42    | 0.17      | 1.17       | 1.25     | 12.09       | 12.60     | 12.11     | 35.89      | 28.23    | 45.66     |

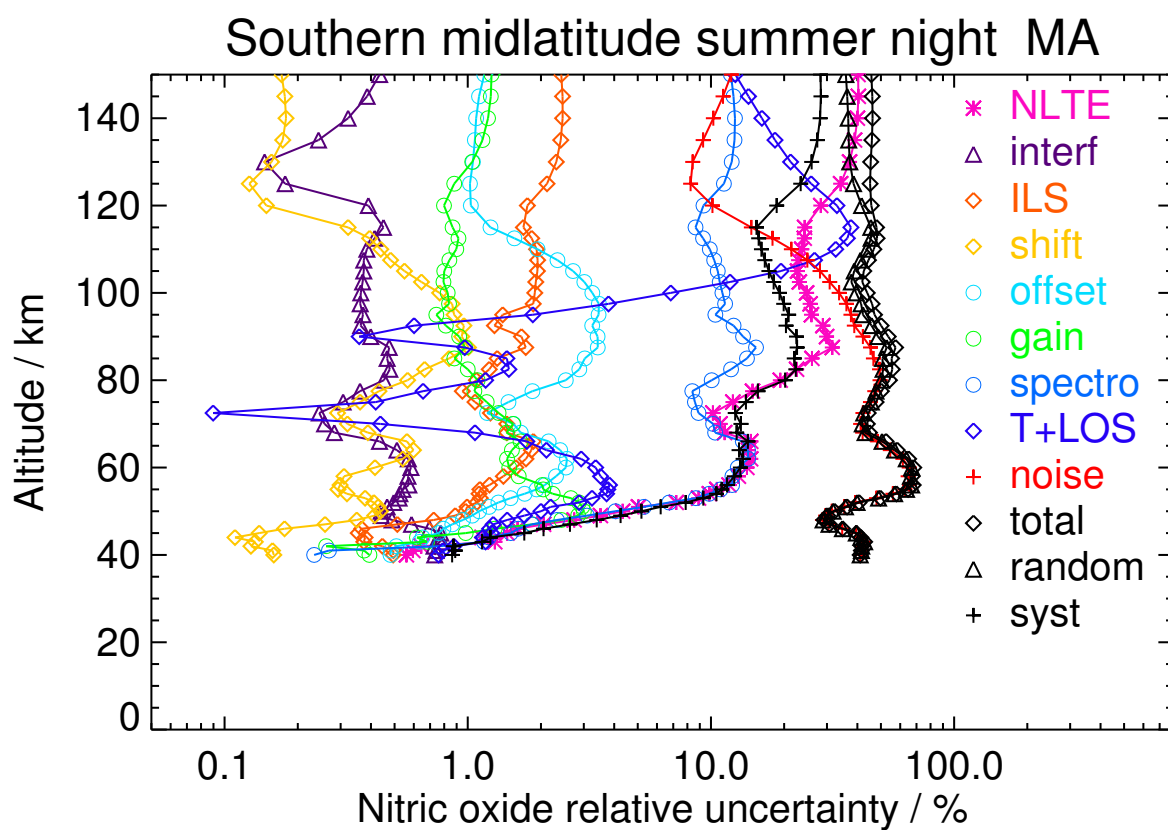

**Figure S92.** V8R\_NO\_561 Southern midlatitude summer night



**Table S94.** Nitric oxide error budget for Southern midlatitude autumn day. All uncertainties are  $1\sigma$ .

| altitude (km) | mean target (ppmv) | NLTE (%) | interf (%) | ILS (%) | shift (%) | offset (%) | gain (%) | spectro (%) | T+LOS (%) | noise (%) | random (%) | syst (%) | total (%) |
|---------------|--------------------|----------|------------|---------|-----------|------------|----------|-------------|-----------|-----------|------------|----------|-----------|
| 20            | 0.00               | 1.86     | 0.33       | 0.18    | 0.12      | 0.50       | 1.28     | 4.90        | 0.81      | 23.75     | 23.82      | 5.18     | 24.38     |
| 30            | 0.01               | 10.98    | 0.24       | 2.08    | 0.42      | 1.11       | 4.36     | 12.94       | 1.78      | 25.56     | 26.29      | 16.67    | 31.13     |
| 40            | 0.01               | 5.77     | 0.05       | 1.09    | 0.33      | 0.55       | 2.44     | 9.94        | 1.21      | 18.97     | 19.26      | 11.40    | 22.38     |
| 50            | 0.01               | 2.00     | 0.06       | 1.11    | 0.09      | 0.33       | 1.50     | 8.88        | 0.93      | 25.63     | 25.83      | 8.77     | 27.28     |
| 60            | 0.01               | 7.33     | 0.16       | 1.31    | 0.56      | 1.78       | 1.06     | 10.26       | 1.29      | 53.30     | 54.27      | 7.95     | 54.84     |
| 70            | 0.02               | 10.88    | 0.22       | 1.75    | 0.56      | 2.15       | 1.37     | 7.39        | 0.13      | 54.88     | 55.61      | 10.13    | 56.52     |
| 80            | 0.07               | 18.78    | 0.24       | 1.84    | 0.58      | 2.36       | 1.75     | 9.51        | 0.64      | 51.65     | 54.31      | 13.19    | 55.89     |
| 90            | 0.88               | 24.95    | 0.20       | 1.85    | 0.46      | 2.81       | 1.40     | 9.58        | 0.63      | 41.61     | 47.09      | 15.54    | 49.59     |
| 100           | 4.97               | 24.25    | 0.21       | 1.91    | 0.28      | 3.12       | 0.96     | 9.48        | 0.14      | 33.21     | 38.46      | 17.78    | 42.37     |
| 110           | 25.38              | 21.43    | 0.26       | 2.10    | 0.11      | 2.23       | 0.76     | 10.53       | 15.69     | 24.23     | 33.74      | 16.57    | 37.59     |
| 120           | 44.20              | 23.79    | 0.17       | 2.36    | 0.05      | 1.10       | 0.75     | 11.98       | 25.28     | 11.62     | 34.39      | 17.55    | 38.61     |
| 130           | 62.58              | 25.68    | 0.04       | 2.17    | 0.06      | 1.24       | 0.69     | 11.49       | 21.69     | 9.69      | 31.61      | 19.07    | 36.92     |
| 140           | 83.52              | 24.91    | 0.12       | 1.93    | 0.08      | 1.34       | 0.64     | 10.47       | 18.40     | 11.39     | 28.92      | 19.19    | 34.71     |
| 150           | 109.39             | 23.86    | 0.17       | 1.70    | 0.09      | 1.42       | 0.60     | 9.41        | 15.37     | 13.02     | 26.84      | 18.67    | 32.70     |

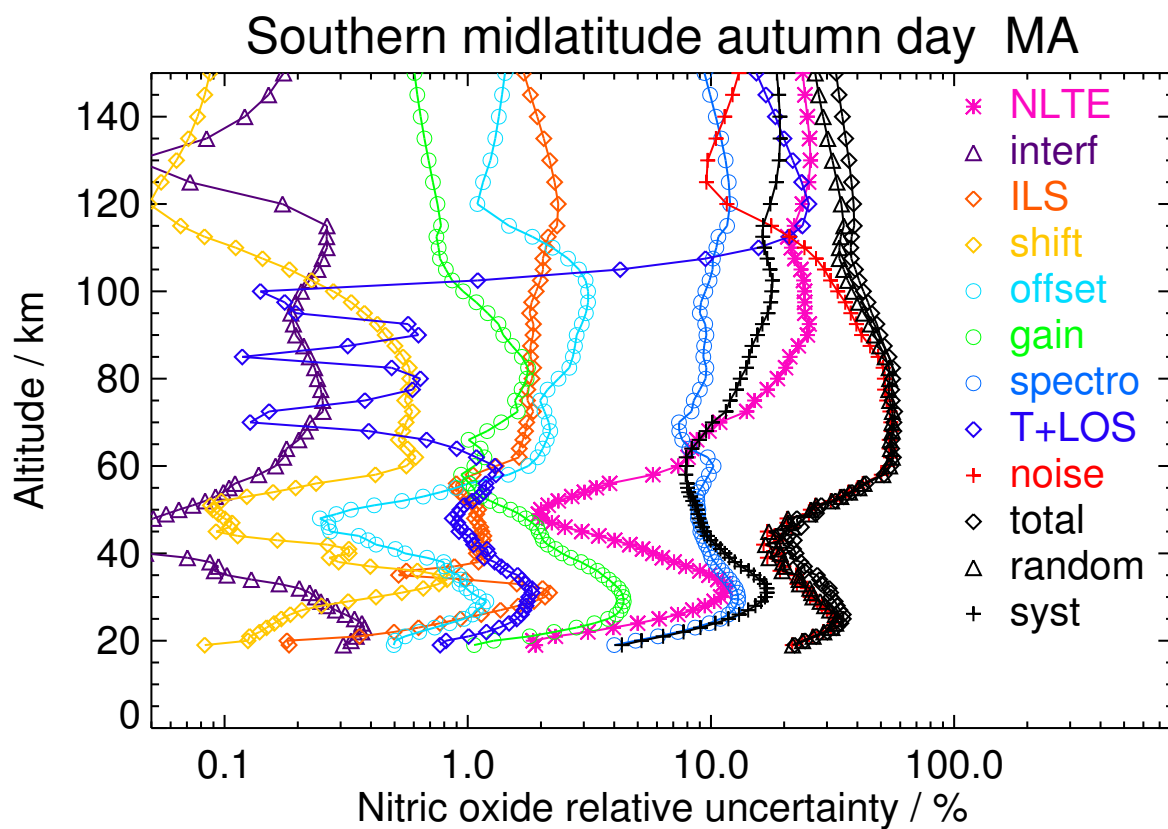

**Figure S93.** V8R\_NO\_561 Southern midlatitude autumn day

**Table S95.** Nitric oxide error budget for Southern midlatitude autumn night. All uncertainties are  $1\sigma$ .

| altitude (km) | mean target (ppmv) | NLTE (%) | interf (%) | ILS (%) | shift (%) | offset (%) | gain (%) | spectro (%) | T+LOS (%) | noise (%) | random (%) | syst (%) | total (%) |
|---------------|--------------------|----------|------------|---------|-----------|------------|----------|-------------|-----------|-----------|------------|----------|-----------|
| 50            | 0.00               | 3.31     | 0.19       | 1.58    | 0.17      | 1.11       | 0.29     | 12.96       | 1.84      | 48.36     | 49.18      | 10.30    | 50.25     |
| 60            | 0.01               | 16.28    | 0.34       | 1.29    | 0.24      | 2.35       | 2.03     | 15.63       | 2.55      | 65.29     | 68.10      | 12.36    | 69.21     |
| 70            | 0.07               | 13.81    | 0.20       | 1.55    | 0.20      | 1.84       | 1.90     | 14.30       | 0.62      | 40.94     | 44.13      | 11.54    | 45.62     |
| 80            | 0.10               | 49.34    | 0.48       | 4.06    | 0.45      | 2.53       | 1.57     | 20.86       | 0.56      | 56.20     | 74.41      | 22.73    | 77.81     |
| 90            | 0.91               | 38.43    | 0.39       | 2.61    | 0.48      | 3.22       | 1.12     | 15.84       | 1.45      | 48.78     | 60.57      | 21.42    | 64.25     |
| 100           | 10.11              | 23.24    | 0.29       | 1.43    | 0.33      | 3.12       | 0.74     | 10.19       | 1.17      | 35.19     | 39.08      | 19.21    | 43.54     |
| 110           | 48.71              | 25.52    | 0.26       | 1.43    | 0.20      | 2.10       | 0.80     | 10.10       | 24.94     | 24.08     | 41.25      | 16.15    | 44.30     |
| 120           | 40.30              | 43.16    | 0.23       | 2.99    | 0.09      | 1.24       | 1.12     | 16.12       | 29.65     | 14.01     | 53.82      | 17.72    | 56.66     |
| 130           | 56.25              | 61.14    | 0.15       | 4.99    | 0.10      | 1.13       | 1.68     | 25.37       | 21.18     | 11.14     | 66.90      | 22.51    | 70.59     |
| 140           | 66.84              | 81.39    | 0.20       | 6.17    | 0.14      | 1.26       | 2.12     | 31.40       | 15.02     | 12.63     | 85.76      | 26.18    | 89.67     |
| 150           | 68.81              | 89.01    | 0.30       | 6.25    | 0.17      | 1.40       | 2.19     | 31.85       | 10.66     | 14.31     | 92.51      | 27.25    | 96.44     |

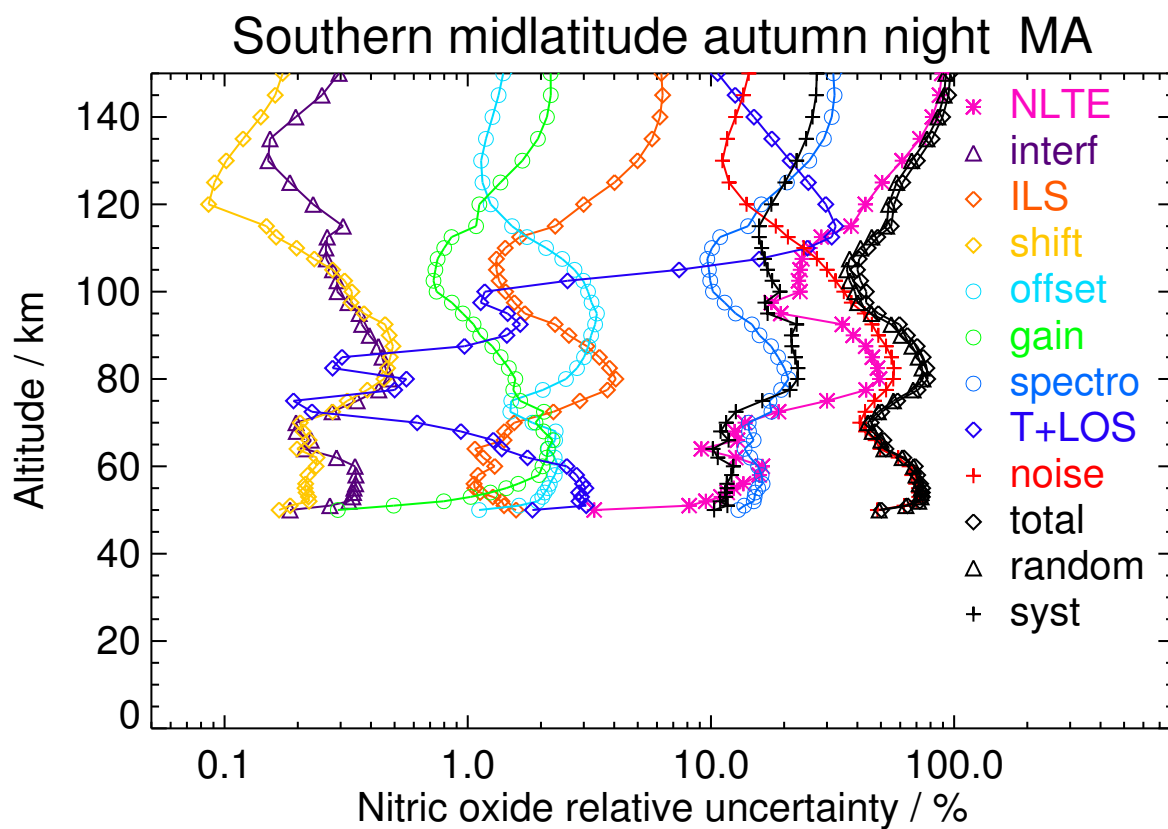

**Figure S94.** V8R\_NO\_561 Southern midlatitude autumn night

**Table S96.** Nitric oxide error budget for Southern polar winter day. All uncertainties are  $1\sigma$ .

| altitude (km) | mean target (ppmv) | NLTE (%) | interf (%) | ILS (%) | shift (%) | offset (%) | gain (%) | spectro (%) | T+LOS (%) | noise (%) | random (%) | syst (%) | total (%) |
|---------------|--------------------|----------|------------|---------|-----------|------------|----------|-------------|-----------|-----------|------------|----------|-----------|
| 30            | 0.01               | 7.81     | 0.46       | 2.18    | 0.57      | 1.56       | 2.70     | 10.79       | 1.56      | 38.82     | 39.42      | 12.15    | 41.25     |
| 40            | 0.00               | 2.22     | 0.11       | 0.97    | 0.24      | 0.51       | 1.58     | 8.69        | 0.88      | 22.20     | 22.44      | 8.62     | 24.04     |
| 50            | 0.00               | 2.88     | 0.15       | 1.31    | 0.10      | 0.41       | 1.13     | 8.47        | 0.91      | 31.30     | 31.49      | 8.50     | 32.62     |
| 60            | 0.01               | 7.53     | 0.25       | 1.63    | 0.15      | 1.81       | 0.79     | 10.42       | 3.62      | 54.90     | 55.56      | 10.60    | 56.56     |
| 70            | 0.03               | 10.47    | 0.26       | 1.85    | 0.24      | 1.98       | 0.64     | 9.95        | 0.07      | 55.68     | 56.15      | 12.80    | 57.59     |
| 80            | 0.17               | 14.64    | 0.33       | 1.68    | 0.30      | 2.18       | 0.69     | 9.61        | 1.23      | 50.65     | 51.49      | 15.17    | 53.68     |
| 90            | 1.94               | 18.25    | 0.30       | 1.62    | 0.34      | 2.61       | 0.70     | 9.11        | 0.14      | 39.16     | 40.78      | 17.21    | 44.26     |
| 100           | 19.20              | 17.05    | 0.27       | 1.74    | 0.33      | 2.77       | 0.73     | 9.42        | 0.62      | 30.23     | 32.27      | 16.24    | 36.12     |
| 110           | 83.47              | 12.65    | 0.28       | 1.64    | 0.14      | 1.82       | 0.60     | 8.29        | 25.13     | 20.40     | 33.33      | 13.12    | 35.82     |
| 120           | 135.60             | 17.26    | 0.15       | 1.69    | 0.11      | 1.11       | 0.60     | 9.13        | 35.79     | 9.77      | 38.31      | 17.16    | 41.98     |
| 130           | 170.87             | 22.63    | 0.12       | 1.80    | 0.15      | 1.33       | 0.69     | 9.98        | 24.26     | 10.17     | 29.67      | 20.72    | 36.18     |
| 140           | 199.49             | 24.22    | 0.22       | 1.76    | 0.15      | 1.35       | 0.75     | 9.92        | 17.56     | 11.93     | 25.90      | 21.68    | 33.78     |
| 150           | 226.07             | 24.73    | 0.29       | 1.66    | 0.14      | 1.37       | 0.80     | 9.45        | 12.82     | 13.44     | 24.16      | 21.62    | 32.42     |

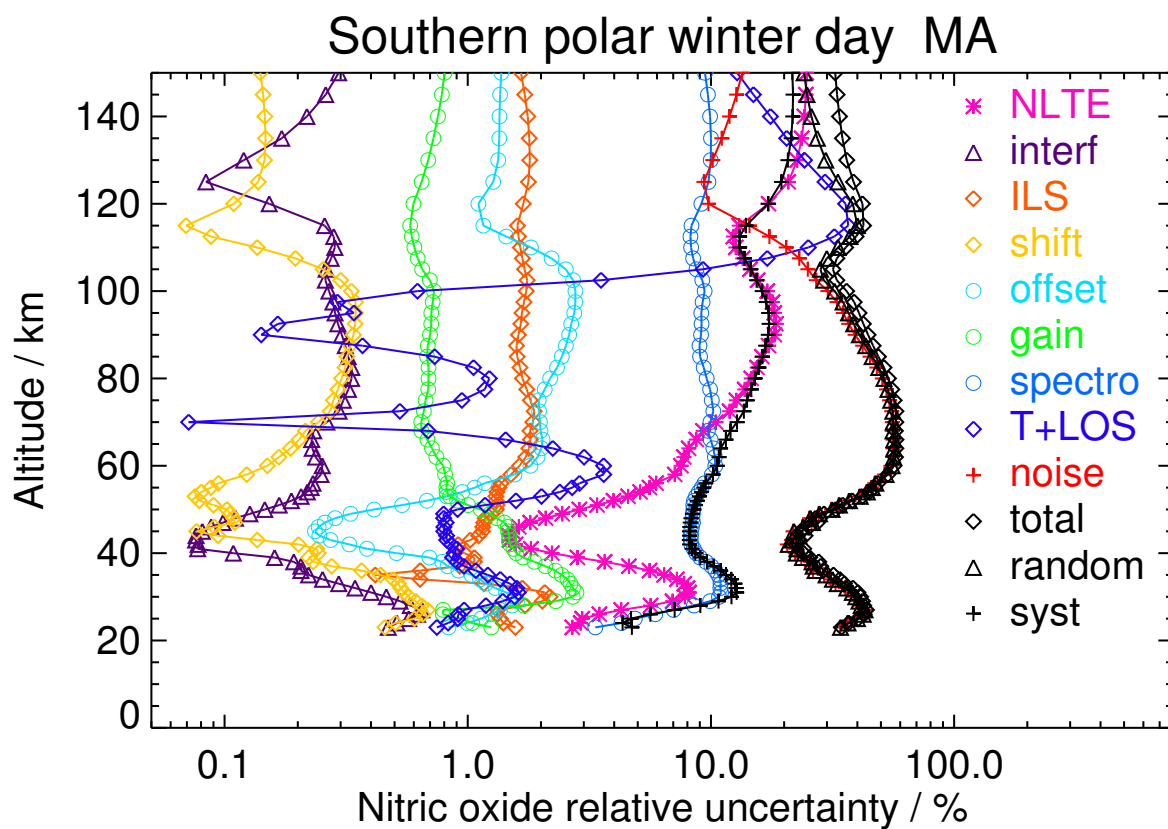

**Figure S95.** V8R\_NO\_561 Southern polar winter day

**Table S97.** Nitric oxide error budget for Southern polar winter night. All uncertainties are  $1\sigma$ .

| altitude (km) | mean target (ppmv) | NLTE (%) | interf (%) | ILS (%) | shift (%) | offset (%) | gain (%) | spectro (%) | T+LOS (%) | noise (%) | random (%) | syst (%) | total (%) |
|---------------|--------------------|----------|------------|---------|-----------|------------|----------|-------------|-----------|-----------|------------|----------|-----------|
| 40            | 0.00               | 7.47     | 0.68       | 1.32    | 0.18      | 1.70       | 2.04     | 10.33       | 2.46      | 66.51     | 67.22      | 9.06     | 67.83     |
| 50            | 0.00               | 12.44    | 0.43       | 1.28    | 0.34      | 1.32       | 1.62     | 13.49       | 3.41      | 59.09     | 60.79      | 12.26    | 62.02     |
| 60            | 0.01               | 19.93    | 0.38       | 1.98    | 0.18      | 2.14       | 1.14     | 13.56       | 5.43      | 58.57     | 61.60      | 16.03    | 63.65     |
| 70            | 0.09               | 13.09    | 0.26       | 1.98    | 0.72      | 2.66       | 1.45     | 12.48       | 4.97      | 53.15     | 55.16      | 12.14    | 56.49     |
| 80            | 0.90               | 14.68    | 0.30       | 4.14    | 1.55      | 3.27       | 1.92     | 18.19       | 2.44      | 52.40     | 56.77      | 10.46    | 57.73     |
| 90            | 5.93               | 18.28    | 0.32       | 2.40    | 0.82      | 2.76       | 1.06     | 13.84       | 6.18      | 41.50     | 45.91      | 13.93    | 47.98     |
| 100           | 26.24              | 27.09    | 0.34       | 2.09    | 0.58      | 3.01       | 0.95     | 11.68       | 3.90      | 35.76     | 41.58      | 21.23    | 46.68     |
| 110           | 88.55              | 23.12    | 0.37       | 1.37    | 0.21      | 2.11       | 0.65     | 8.05        | 26.23     | 23.81     | 38.71      | 19.05    | 43.14     |
| 120           | 144.15             | 20.65    | 0.27       | 1.38    | 0.10      | 1.04       | 0.52     | 7.66        | 32.60     | 10.17     | 36.45      | 18.05    | 40.68     |
| 130           | 191.44             | 25.01    | 0.10       | 1.83    | 0.11      | 1.01       | 0.68     | 9.87        | 23.23     | 8.20      | 29.38      | 21.72    | 36.54     |
| 140           | 237.55             | 31.12    | 0.23       | 2.20    | 0.09      | 1.10       | 0.81     | 11.64       | 17.75     | 10.24     | 30.07      | 25.04    | 39.13     |
| 150           | 263.51             | 35.98    | 0.36       | 2.41    | 0.08      | 1.24       | 0.87     | 12.56       | 13.49     | 12.27     | 32.40      | 27.26    | 42.34     |

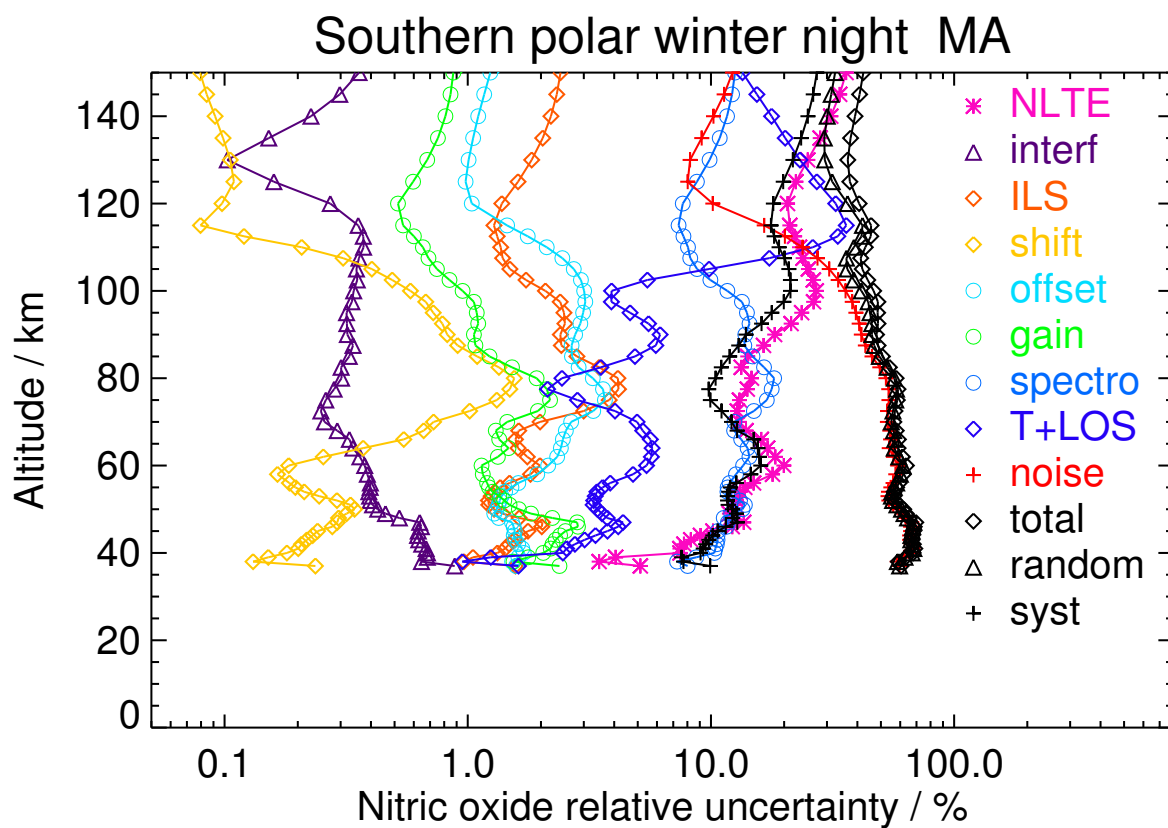

**Figure S96.** V8R\_NO\_561 Southern polar winter night

**Table S98.** Nitric oxide error budget for Southern polar spring day. All uncertainties are  $1\sigma$ .

| altitude (km) | mean target (ppmv) | NLTE (%) | interf (%) | ILS (%) | shift (%) | offset (%) | gain (%) | spectro (%) | T+LOS (%) | noise (%) | random (%) | syst (%) | total (%) |
|---------------|--------------------|----------|------------|---------|-----------|------------|----------|-------------|-----------|-----------|------------|----------|-----------|
| 20            | 0.00               | 1.84     | 0.47       | 1.44    | 0.25      | 0.55       | 1.18     | 6.31        | 0.70      | 20.78     | 21.41      | 4.59     | 21.90     |
| 30            | 0.00               | 4.10     | 0.13       | 2.32    | 0.40      | 0.57       | 2.57     | 9.90        | 1.11      | 14.44     | 15.48      | 9.88     | 18.36     |
| 40            | 0.01               | 2.29     | 0.05       | 0.74    | 0.24      | 0.27       | 1.67     | 8.76        | 0.76      | 14.01     | 14.35      | 8.74     | 16.80     |
| 50            | 0.01               | 1.66     | 0.09       | 1.29    | 0.11      | 0.23       | 1.35     | 8.72        | 0.73      | 24.53     | 24.71      | 8.60     | 26.16     |
| 60            | 0.01               | 9.48     | 0.25       | 2.12    | 0.48      | 1.82       | 0.70     | 10.75       | 2.36      | 57.09     | 57.85      | 11.53    | 58.98     |
| 70            | 0.02               | 11.04    | 0.18       | 3.09    | 0.61      | 1.80       | 1.03     | 10.68       | 0.31      | 49.81     | 50.94      | 11.72    | 52.27     |
| 80            | 0.06               | 15.53    | 0.31       | 3.36    | 0.78      | 2.69       | 1.90     | 10.29       | 0.68      | 53.96     | 54.98      | 16.09    | 57.29     |
| 90            | 0.58               | 22.15    | 0.36       | 3.17    | 0.91      | 3.92       | 2.37     | 10.31       | 0.28      | 52.96     | 54.80      | 20.76    | 58.60     |
| 100           | 4.62               | 21.29    | 0.36       | 2.91    | 0.82      | 3.95       | 2.17     | 9.61        | 1.49      | 42.65     | 44.40      | 20.63    | 48.96     |
| 110           | 28.37              | 18.87    | 0.38       | 2.73    | 0.54      | 2.66       | 1.67     | 9.41        | 21.48     | 30.09     | 38.50      | 18.65    | 42.77     |
| 120           | 51.02              | 20.68    | 0.20       | 2.04    | 0.10      | 0.96       | 0.72     | 9.16        | 25.78     | 10.95     | 29.39      | 20.93    | 36.08     |
| 130           | 78.75              | 24.10    | 0.07       | 1.69    | 0.20      | 1.08       | 0.70     | 9.34        | 20.37     | 7.71      | 24.07      | 23.82    | 33.87     |
| 140           | 122.02             | 25.64    | 0.17       | 1.57    | 0.26      | 1.21       | 0.97     | 9.40        | 16.96     | 10.34     | 23.20      | 24.64    | 33.84     |
| 150           | 164.73             | 25.93    | 0.24       | 1.43    | 0.28      | 1.29       | 1.17     | 9.09        | 13.93     | 12.58     | 22.79      | 24.35    | 33.35     |

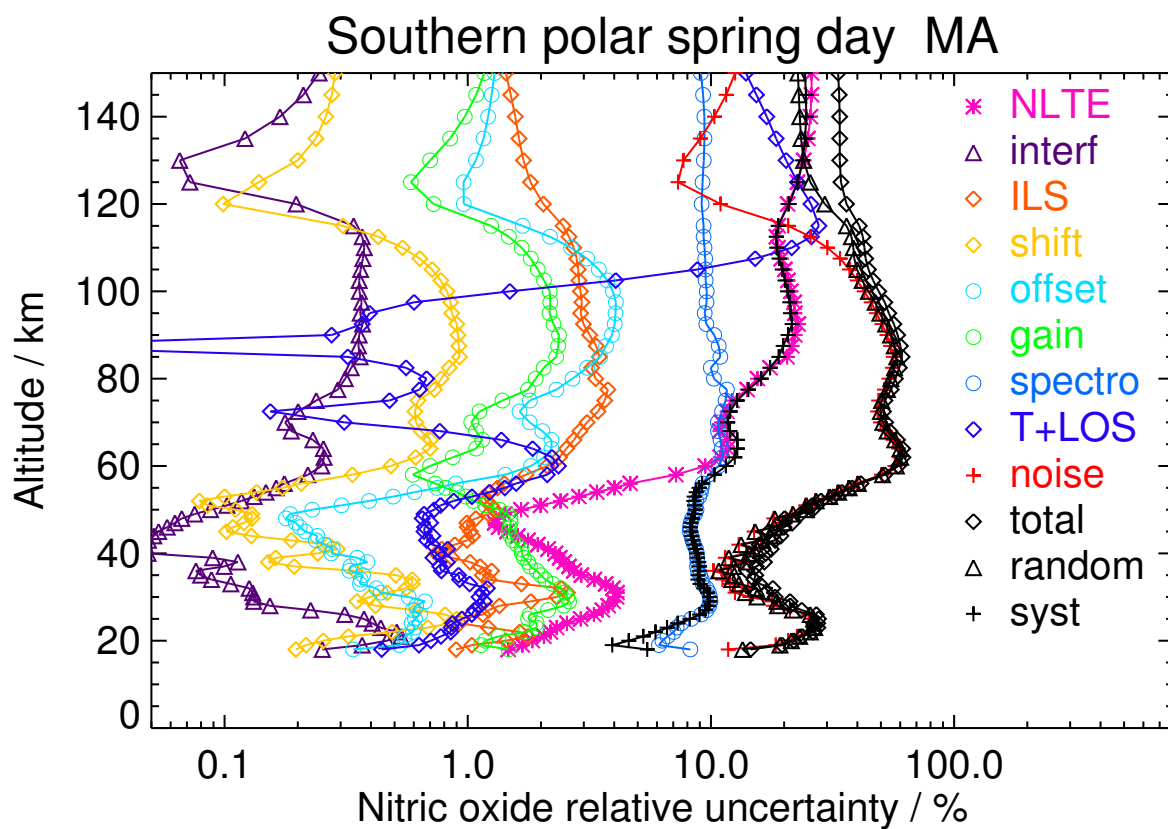

**Figure S97.** V8R\_NO\_561 Southern polar spring day

**Table S99.** Nitric oxide error budget for Southern polar spring night. All uncertainties are  $1\sigma$ .

| altitude (km) | mean target (ppmv) | NLTE (%) | interf (%) | ILS (%) | shift (%) | offset (%) | gain (%) | spectro (%) | T+LOS (%) | noise (%) | random (%) | syst (%) | total (%) |
|---------------|--------------------|----------|------------|---------|-----------|------------|----------|-------------|-----------|-----------|------------|----------|-----------|
| 40            | 0.00               | 0.92     | 0.76       | 1.19    | 0.21      | 1.02       | 1.93     | 1.00        | 1.53      | 53.61     | 53.70      | 1.19     | 53.71     |
| 50            | 0.00               | 3.14     | 0.57       | 1.93    | 0.53      | 1.41       | 4.79     | 4.26        | 1.54      | 39.13     | 39.44      | 5.94     | 39.89     |
| 60            | 0.01               | 9.20     | 0.42       | 1.32    | 0.42      | 2.22       | 1.94     | 12.19       | 1.98      | 56.78     | 58.18      | 9.32     | 58.93     |
| 70            | 0.20               | 6.35     | 0.09       | 1.35    | 0.23      | 1.99       | 1.48     | 13.10       | 0.38      | 33.88     | 35.69      | 9.72     | 36.99     |
| 80            | 0.23               | 9.38     | 0.25       | 2.14    | 0.44      | 1.73       | 0.93     | 8.81        | 0.66      | 41.29     | 41.86      | 11.28    | 43.36     |
| 90            | 0.94               | 24.26    | 0.64       | 2.20    | 0.95      | 3.70       | 2.29     | 8.69        | 0.40      | 50.95     | 53.54      | 20.46    | 57.32     |
| 100           | 5.82               | 20.99    | 0.72       | 2.35    | 0.88      | 3.80       | 2.42     | 9.08        | 0.93      | 41.04     | 43.63      | 18.21    | 47.28     |
| 110           | 25.30              | 21.54    | 0.67       | 1.97    | 0.53      | 2.58       | 1.73     | 8.76        | 20.90     | 29.03     | 38.57      | 18.62    | 42.83     |
| 120           | 46.11              | 24.56    | 0.24       | 1.88    | 0.12      | 0.96       | 0.73     | 10.19       | 23.51     | 10.81     | 30.92      | 20.64    | 37.17     |
| 130           | 67.00              | 28.65    | 0.19       | 1.99    | 0.21      | 1.09       | 0.93     | 11.06       | 19.36     | 8.62      | 29.35      | 23.17    | 37.39     |
| 140           | 92.86              | 29.82    | 0.31       | 2.06    | 0.22      | 1.22       | 1.05     | 11.06       | 16.34     | 11.05     | 29.18      | 23.58    | 37.51     |
| 150           | 111.53             | 28.85    | 0.38       | 1.98    | 0.20      | 1.27       | 1.09     | 10.34       | 13.44     | 12.58     | 27.77      | 22.67    | 35.85     |

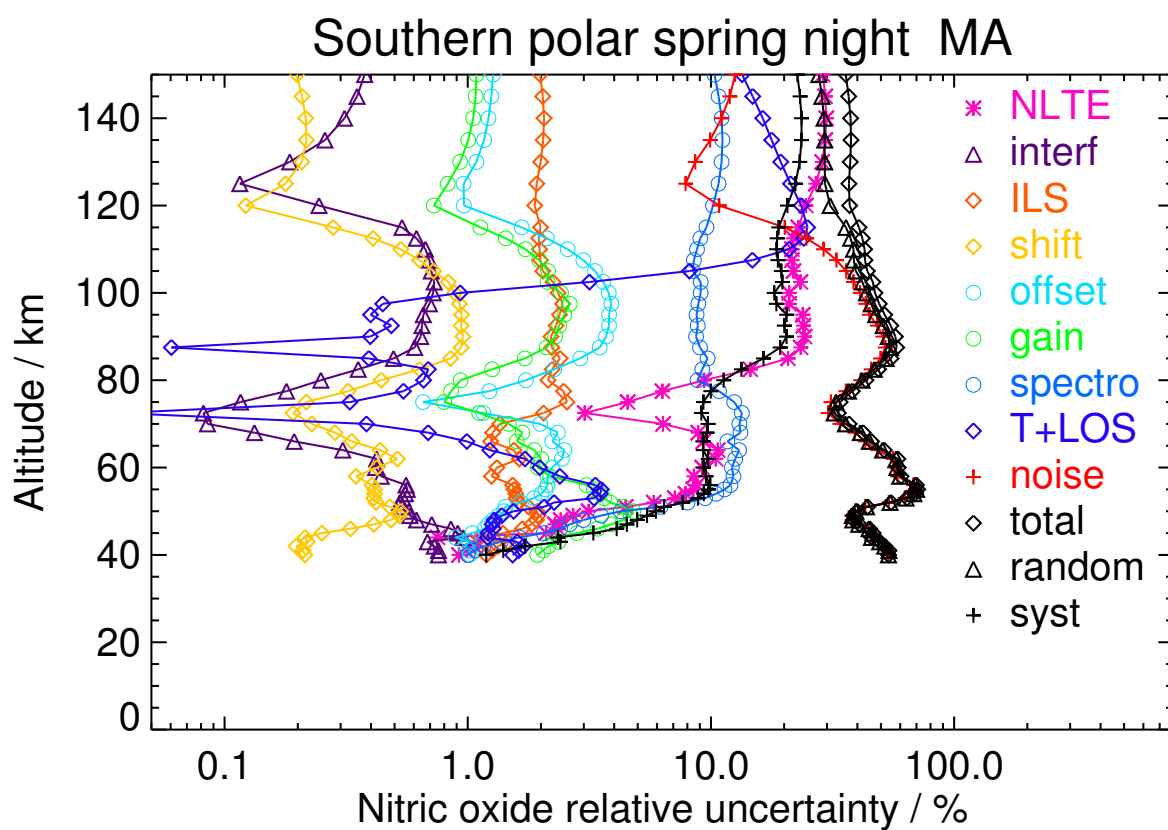

**Figure S98.** V8R\_NO\_561 Southern polar spring night

**Table S100.** Nitric oxide error budget for Southern polar summer day. All uncertainties are  $1\sigma$ .

| altitude (km) | mean target (ppmv) | NLTE (%) | interf (%) | ILS (%) | shift (%) | offset (%) | gain (%) | spectro (%) | T+LOS (%) | noise (%) | random (%) | syst (%) | total (%) |
|---------------|--------------------|----------|------------|---------|-----------|------------|----------|-------------|-----------|-----------|------------|----------|-----------|
| 20            | 0.00               | 1.72     | 0.57       | 0.41    | 0.30      | 0.43       | 1.56     | 7.14        | 1.20      | 20.97     | 21.20      | 7.00     | 22.33     |
| 30            | 0.01               | 3.63     | 0.29       | 2.90    | 0.40      | 0.67       | 2.06     | 8.92        | 1.57      | 16.59     | 16.90      | 9.92     | 19.59     |
| 40            | 0.01               | 1.83     | 0.06       | 0.64    | 0.30      | 0.29       | 1.55     | 8.39        | 0.97      | 10.10     | 10.32      | 8.56     | 13.41     |
| 50            | 0.01               | 1.74     | 0.07       | 1.06    | 0.14      | 0.18       | 1.24     | 7.99        | 0.86      | 18.15     | 18.32      | 8.01     | 19.99     |
| 60            | 0.01               | 9.13     | 0.21       | 1.14    | 0.48      | 0.98       | 0.99     | 9.16        | 2.97      | 38.73     | 39.89      | 9.37     | 40.98     |
| 70            | 0.02               | 29.23    | 0.27       | 2.08    | 0.87      | 1.69       | 1.25     | 10.55       | 0.80      | 47.17     | 53.43      | 18.60    | 56.58     |
| 80            | 0.04               | 28.31    | 0.19       | 1.99    | 0.83      | 1.72       | 1.16     | 11.61       | 1.87      | 39.62     | 44.40      | 23.39    | 50.19     |
| 90            | 1.75               | 46.69    | 0.13       | 1.21    | 0.94      | 2.15       | 1.43     | 10.79       | 3.08      | 31.09     | 48.65      | 30.24    | 57.28     |
| 100           | 17.24              | 35.27    | 0.14       | 1.49    | 0.56      | 2.65       | 0.84     | 8.81        | 14.49     | 27.44     | 40.38      | 25.77    | 47.90     |
| 110           | 35.24              | 23.62    | 0.27       | 1.66    | 0.17      | 1.57       | 0.73     | 8.00        | 22.48     | 16.14     | 32.59      | 18.21    | 37.33     |
| 120           | 64.46              | 33.30    | 0.21       | 1.83    | 0.35      | 1.32       | 0.85     | 8.99        | 27.53     | 10.23     | 38.14      | 24.57    | 45.37     |
| 130           | 119.33             | 31.89    | 0.11       | 1.88    | 0.25      | 1.27       | 0.86     | 10.20       | 25.69     | 8.99      | 34.64      | 25.84    | 43.21     |
| 140           | 219.19             | 30.24    | 0.18       | 1.83    | 0.25      | 1.14       | 0.99     | 10.34       | 22.81     | 9.31      | 31.15      | 25.77    | 40.43     |
| 150           | 319.24             | 30.71    | 0.24       | 1.76    | 0.25      | 1.12       | 1.06     | 10.12       | 19.18     | 10.59     | 28.71      | 26.58    | 39.12     |

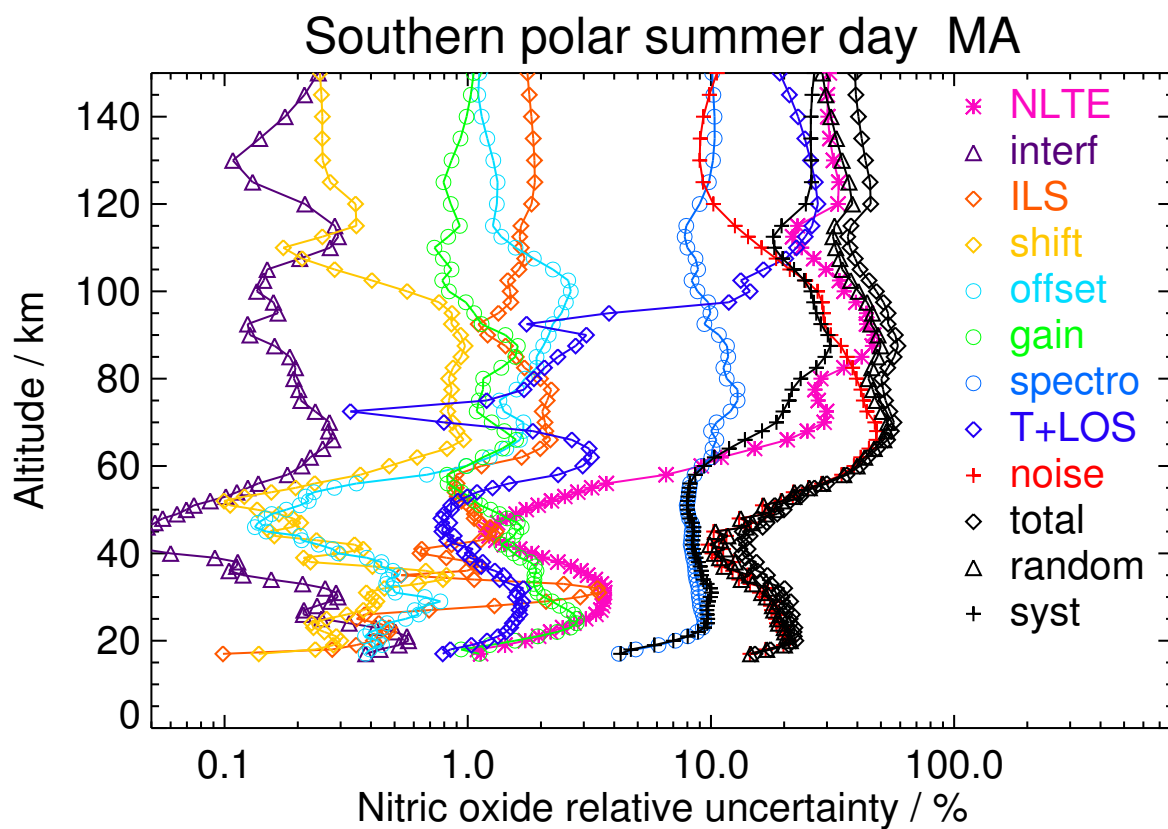

**Figure S99.** V8R\_NO\_561 Southern polar summer day

**Table S101.** Nitric oxide error budget for Southern polar summer night. All uncertainties are  $1\sigma$ .

| altitude (km) | mean target (ppmv) | NLTE (%) | interf (%) | ILS (%) | shift (%) | offset (%) | gain (%) | spectro (%) | T+LOS (%) | noise (%) | random (%) | syst (%) | total (%) |
|---------------|--------------------|----------|------------|---------|-----------|------------|----------|-------------|-----------|-----------|------------|----------|-----------|
| 40            | 0.00               | 1.70     | 0.82       | 0.40    | 0.07      | 0.90       | 0.11     | 0.75        | 0.74      | 41.92     | 41.94      | 1.90     | 41.99     |
| 50            | 0.00               | 4.66     | 0.64       | 0.59    | 0.38      | 1.70       | 3.28     | 3.35        | 3.93      | 45.01     | 45.49      | 4.44     | 45.71     |
| 60            | 0.00               | 10.30    | 0.39       | 1.34    | 0.26      | 2.23       | 1.57     | 14.46       | 3.14      | 56.29     | 58.42      | 9.48     | 59.19     |
| 70            | 0.04               | 10.74    | 0.30       | 1.24    | 0.39      | 1.67       | 1.45     | 9.18        | 0.40      | 45.71     | 46.04      | 13.28    | 47.92     |
| 80            | 0.05               | 15.27    | 0.46       | 0.77    | 0.57      | 2.90       | 0.58     | 7.85        | 1.14      | 49.93     | 50.03      | 17.19    | 52.90     |
| 90            | 0.70               | 26.08    | 0.55       | 1.29    | 0.66      | 3.94       | 1.10     | 7.57        | 0.28      | 49.70     | 50.30      | 26.40    | 56.81     |
| 100           | 6.95               | 26.81    | 0.54       | 1.31    | 0.68      | 3.63       | 1.07     | 7.46        | 5.63      | 36.39     | 40.65      | 22.24    | 46.34     |
| 110           | 24.64              | 25.96    | 0.57       | 1.67    | 0.35      | 2.44       | 0.85     | 9.16        | 22.35     | 25.13     | 39.80      | 17.75    | 43.58     |
| 120           | 51.63              | 28.00    | 0.22       | 1.97    | 0.13      | 1.00       | 0.73     | 11.20       | 25.17     | 8.90      | 35.27      | 19.59    | 40.35     |
| 130           | 73.38              | 34.41    | 0.18       | 2.39    | 0.21      | 1.24       | 0.93     | 12.98       | 21.40     | 8.98      | 36.09      | 24.43    | 43.59     |
| 140           | 108.77             | 37.93    | 0.32       | 2.63    | 0.18      | 1.29       | 1.07     | 13.82       | 18.52     | 11.34     | 37.63      | 26.36    | 45.94     |
| 150           | 138.05             | 41.66    | 0.43       | 2.77    | 0.13      | 1.35       | 1.17     | 14.19       | 15.63     | 13.04     | 40.20      | 27.32    | 48.61     |

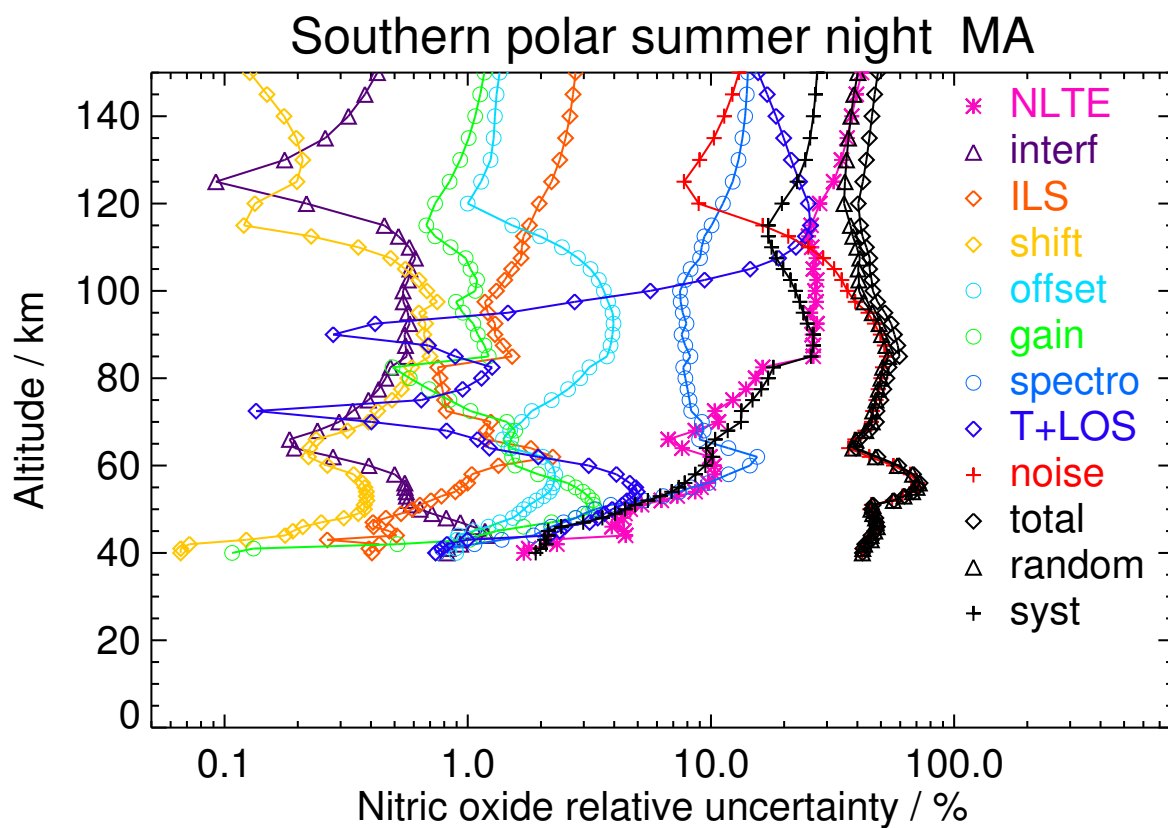

**Figure S100.** V8R\_NO\_561 Southern polar summer night



**Table S102.** Nitric oxide error budget for Southern polar autumn day. All uncertainties are  $1\sigma$ .

| altitude (km) | mean target (ppmv) | NLTE (%) | interf (%) | ILS (%) | shift (%) | offset (%) | gain (%) | spectro (%) | T+LOS (%) | noise (%) | random (%) | syst (%) | total (%) |
|---------------|--------------------|----------|------------|---------|-----------|------------|----------|-------------|-----------|-----------|------------|----------|-----------|
| 20            | 0.00               | 1.46     | 0.41       | 0.22    | 0.17      | 0.60       | 2.99     | 7.41        | 1.10      | 22.26     | 22.31      | 8.09     | 23.73     |
| 30            | 0.01               | 9.29     | 0.31       | 1.77    | 0.56      | 1.55       | 4.99     | 11.25       | 2.63      | 32.11     | 32.84      | 14.25    | 35.80     |
| 40            | 0.01               | 6.61     | 0.13       | 2.13    | 0.33      | 0.84       | 2.43     | 11.95       | 1.40      | 33.14     | 33.68      | 12.81    | 36.03     |
| 50            | 0.00               | 5.66     | 0.15       | 1.32    | 0.12      | 0.80       | 1.35     | 10.14       | 1.76      | 42.60     | 43.24      | 9.33     | 44.24     |
| 60            | 0.01               | 11.67    | 0.25       | 1.59    | 0.35      | 1.99       | 0.89     | 10.34       | 2.52      | 59.01     | 60.10      | 11.29    | 61.15     |
| 70            | 0.03               | 16.52    | 0.30       | 1.77    | 0.42      | 2.09       | 0.86     | 9.70        | 0.20      | 57.09     | 58.55      | 14.37    | 60.28     |
| 80            | 0.13               | 22.19    | 0.27       | 1.88    | 0.37      | 2.19       | 0.96     | 11.69       | 0.75      | 49.51     | 52.68      | 17.76    | 55.59     |
| 90            | 1.24               | 28.44    | 0.26       | 1.40    | 0.32      | 2.99       | 0.70     | 9.16        | 0.56      | 42.68     | 47.26      | 22.20    | 52.22     |
| 100           | 10.60              | 28.79    | 0.21       | 1.22    | 0.19      | 3.24       | 0.58     | 8.18        | 0.13      | 33.60     | 38.14      | 24.13    | 45.13     |
| 110           | 71.79              | 21.27    | 0.21       | 1.41    | 0.06      | 2.07       | 0.77     | 8.13        | 21.87     | 21.11     | 33.86      | 17.40    | 38.07     |
| 120           | 127.86             | 22.17    | 0.12       | 2.01    | 0.09      | 1.12       | 0.69     | 9.83        | 30.28     | 9.57      | 35.73      | 18.06    | 40.03     |
| 130           | 153.96             | 26.81    | 0.08       | 2.23    | 0.08      | 1.10       | 0.76     | 11.51       | 19.97     | 8.10      | 29.14      | 21.76    | 36.37     |
| 140           | 174.95             | 28.87    | 0.15       | 2.18    | 0.09      | 1.11       | 0.78     | 11.52       | 14.84     | 10.44     | 27.61      | 23.23    | 36.09     |
| 150           | 197.27             | 30.31    | 0.19       | 1.99    | 0.09      | 1.27       | 0.76     | 10.74       | 11.38     | 12.56     | 27.46      | 23.94    | 36.43     |

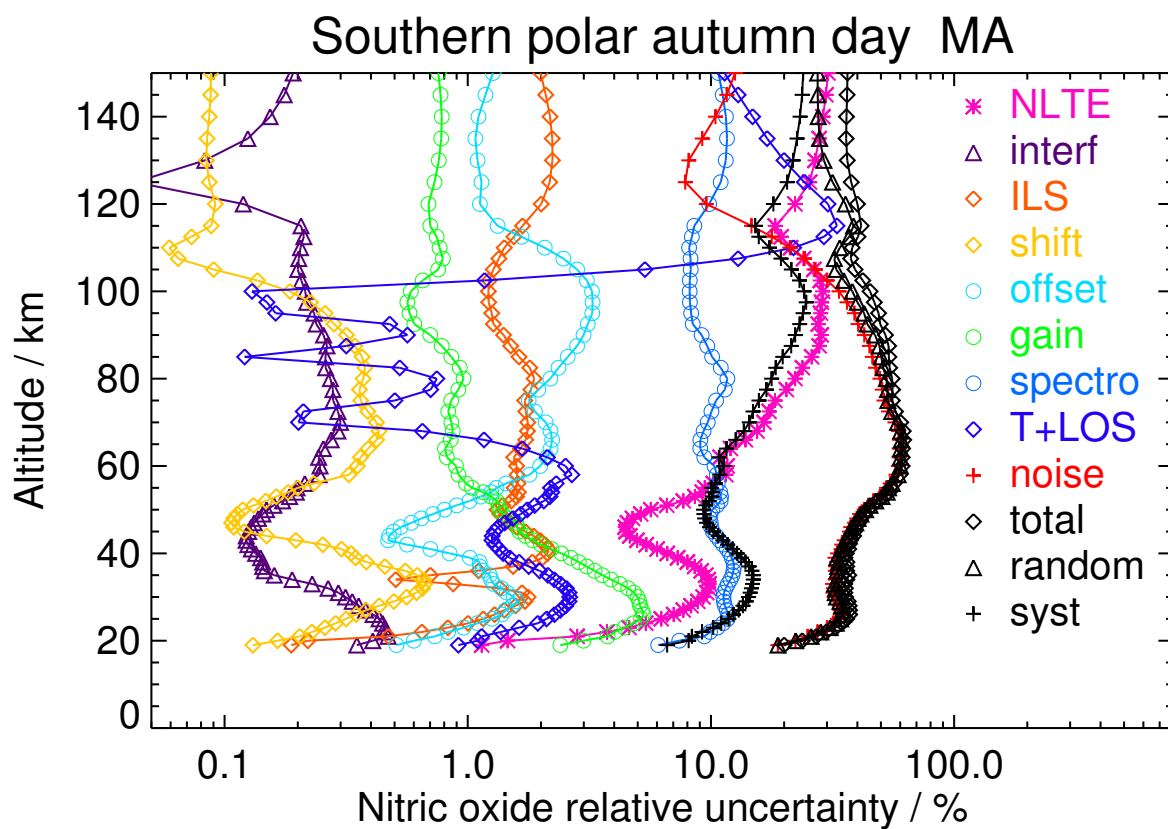

**Figure S101.** V8R\_NO\_561 Southern polar autumn day

**Table S103.** Nitric oxide error budget for Southern polar autumn night. All uncertainties are  $1\sigma$ .

| altitude (km) | mean target (ppmv) | NLTE (%) | interf (%) | ILS (%) | shift (%) | offset (%) | gain (%) | spectro (%) | T+LOS (%) | noise (%) | random (%) | syst (%) | total (%) |
|---------------|--------------------|----------|------------|---------|-----------|------------|----------|-------------|-----------|-----------|------------|----------|-----------|
| 50            | 0.00               | 12.67    | 0.20       | 1.25    | 0.20      | 1.02       | 0.64     | 12.28       | 3.26      | 52.39     | 54.41      | 10.49    | 55.41     |
| 60            | 0.02               | 14.73    | 0.28       | 1.32    | 0.25      | 1.71       | 1.88     | 12.30       | 3.12      | 47.80     | 50.56      | 10.74    | 51.69     |
| 70            | 0.08               | 20.00    | 0.25       | 2.16    | 0.39      | 2.07       | 1.28     | 13.07       | 2.24      | 55.57     | 59.01      | 13.87    | 60.62     |
| 80            | 0.39               | 20.08    | 0.27       | 1.18    | 0.46      | 2.12       | 1.41     | 11.95       | 0.76      | 52.77     | 55.09      | 17.47    | 57.79     |
| 90            | 3.61               | 22.12    | 0.23       | 0.92    | 0.53      | 2.89       | 1.18     | 10.77       | 3.51      | 45.52     | 48.57      | 18.48    | 51.97     |
| 100           | 23.08              | 23.21    | 0.19       | 0.89    | 0.38      | 2.90       | 1.01     | 9.41        | 3.11      | 35.02     | 39.22      | 18.30    | 43.28     |
| 110           | 116.54             | 22.18    | 0.19       | 1.65    | 0.12      | 1.92       | 0.85     | 9.11        | 39.75     | 21.99     | 48.33      | 17.62    | 51.44     |
| 120           | 144.19             | 23.05    | 0.13       | 1.75    | 0.08      | 1.03       | 0.62     | 8.87        | 30.63     | 11.20     | 35.77      | 19.95    | 40.96     |
| 130           | 185.61             | 26.29    | 0.08       | 2.12    | 0.08      | 0.87       | 0.68     | 10.68       | 20.02     | 7.11      | 27.55      | 22.43    | 35.52     |
| 140           | 217.01             | 30.89    | 0.14       | 2.29    | 0.04      | 1.00       | 0.74     | 11.86       | 14.80     | 9.49      | 28.37      | 24.61    | 37.56     |
| 150           | 230.31             | 34.49    | 0.18       | 2.24    | 0.03      | 1.19       | 0.73     | 11.79       | 11.09     | 11.96     | 30.42      | 25.99    | 40.02     |

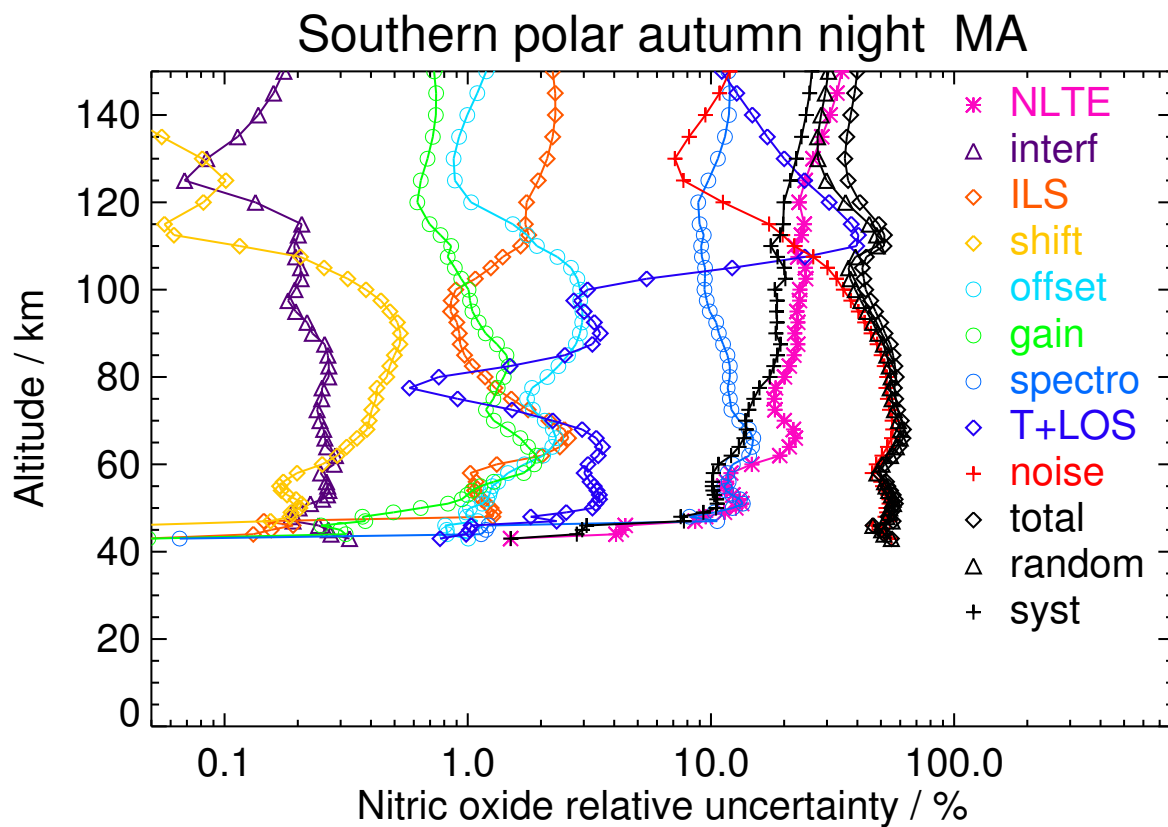

**Figure S102.** V8R\_NO\_561 Southern polar autumn night

**Table S104.** Nitric oxide error budget for Northern polar winter day. All uncertainties are  $1\sigma$ .

| altitude<br>(km) | mean target<br>(ppmv) | NLTE<br>(%) | interf<br>(%) | ILS<br>(%) | smooth.<br>(%) | shift<br>(%) | offset<br>(%) | gain<br>(%) | spectro<br>(%) | T+LOS<br>(%) | noise<br>(%) | random<br>(%) | syst<br>(%) | total<br>(%) |
|------------------|-----------------------|-------------|---------------|------------|----------------|--------------|---------------|-------------|----------------|--------------|--------------|---------------|-------------|--------------|
| 40               | 0.01                  | 14.15       | 0.08          | 1.84       | 0.07           | 0.08         | 2.80          | 3.75        | 13.30          | 1.45         | 71.23        | 72.10         | 16.73       | 74.02        |
| 50               | 0.01                  | 9.38        | 0.08          | 0.89       | 0.10           | 0.06         | 2.75          | 2.17        | 11.57          | 0.83         | 56.38        | 57.27         | 11.58       | 58.43        |
| 60               | 0.03                  | 8.54        | 0.03          | 1.05       | 0.07           | 0.09         | 2.47          | 1.51        | 14.42          | 0.62         | 38.80        | 41.15         | 10.10       | 42.38        |
| 70               | 0.14                  | 5.63        | 0.02          | 2.01       | 0.08           | 0.06         | 2.52          | 1.12        | 11.37          | 0.02         | 30.61        | 32.03         | 9.17        | 33.31        |
| 80               | 0.37                  | 5.16        | <0.01         | 1.74       | 0.11           | 0.06         | 3.93          | 1.59        | 11.02          | 0.12         | 29.89        | 31.28         | 9.16        | 32.60        |
| 90               | 2.09                  | 8.41        | <0.01         | 1.01       | 0.22           | 0.05         | 7.18          | 2.46        | 12.67          | 0.14         | 29.68        | 32.57         | 10.49       | 34.22        |
| 100              | 10.87                 | 13.99       | <0.01         | 1.55       | 0.29           | 0.12         | 7.76          | 3.06        | 14.64          | 0.08         | 27.39        | 32.85         | 12.37       | 35.10        |
| 110              | 64.56                 | 7.84        | <0.01         | 1.07       | 1.07           | 0.04         | 4.09          | 1.13        | 9.48           | 3.94         | 23.68        | 25.83         | 8.98        | 27.35        |
| 120              | 153.30                | 22.04       | <0.01         | 1.19       | 3.57           | 0.21         | 3.04          | 0.62        | 9.86           | <0.01        | 27.13        | 32.55         | 16.85       | 36.65        |
| 130              | 227.37                | 27.24       | <0.01         | 2.28       | 5.03           | 0.39         | 3.61          | 0.54        | 8.86           | <0.01        | 31.21        | 36.75         | 22.09       | 42.87        |
| 140              | 230.51                | 27.06       | 0.02          | 2.27       | 6.88           | 0.39         | 4.00          | 0.56        | 9.27           | <0.01        | 33.43        | 37.94         | 23.77       | 44.77        |
| 150              | 273.36                | 30.60       | 0.02          | 2.76       | 7.51           | 0.50         | 3.58          | 0.77        | 12.74          | <0.01        | 29.96        | 39.63         | 22.43       | 45.54        |
| 160              | 340.14                | 32.56       | 0.01          | 2.81       | 7.02           | 0.42         | 2.92          | 0.81        | 13.54          | <0.01        | 27.76        | 39.90         | 22.10       | 45.61        |
| 170              | 388.88                | 30.30       | 0.01          | 2.51       | 7.00           | 0.30         | 2.84          | 0.73        | 12.24          | <0.01        | 32.12        | 40.84         | 22.26       | 46.51        |
| 180              | 407.10                | 30.58       | 0.01          | 2.51       | 7.34           | 0.29         | 3.02          | 0.73        | 12.37          | <0.01        | 38.04        | 45.91         | 22.29       | 51.04        |

**S4 NO error contribution profile plots and tabulated values for RR UA data (V8R\_NOWT\_662) at low solar activity conditions**

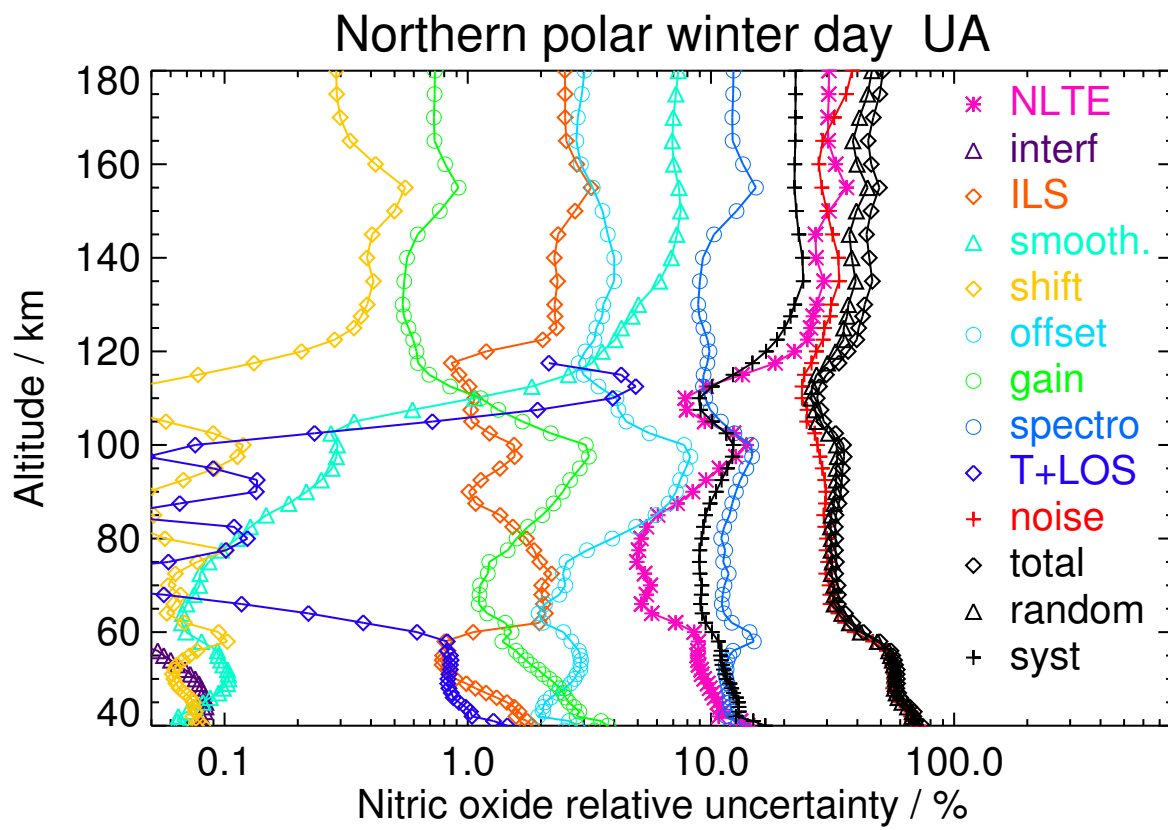

Figure S103. V8R\_NOwT\_662 Northern polar winter day

**Table S105.** Nitric oxide error budget for Northern polar winter night. All uncertainties are  $1\sigma$ .

| altitude (km) | mean target (ppmv) | NLTE (%) | interf (%) | ILS (%) | smooth. (%) | shift (%) | offset (%) | gain (%) | spectro (%) | T+LOS (%) | noise (%) | random (%) | syst (%) | total (%) |
|---------------|--------------------|----------|------------|---------|-------------|-----------|------------|----------|-------------|-----------|-----------|------------|----------|-----------|
| 50            | 0.00               | 5.83     | 0.27       | 0.41    | 0.04        | 0.15      | 1.38       | 0.43     | 9.22        | 0.91      | 72.74     | 72.91      | 9.82     | 73.57     |
| 60            | 0.01               | 7.72     | 0.20       | 1.55    | 0.14        | 0.12      | 3.57       | 0.97     | 11.01       | 1.10      | 68.44     | 69.28      | 9.06     | 69.87     |
| 70            | 0.07               | 6.90     | 0.11       | 2.13    | 0.18        | 0.17      | 3.67       | 1.76     | 10.86       | 0.48      | 52.48     | 53.62      | 8.15     | 54.23     |
| 80            | 0.74               | 6.66     | 0.05       | 1.86    | 0.21        | 0.12      | 4.12       | 1.85     | 10.29       | 0.07      | 36.50     | 37.98      | 8.00     | 38.82     |
| 90            | 5.50               | 8.81     | 0.02       | 1.35    | 0.31        | 0.15      | 6.15       | 2.57     | 9.76        | 0.74      | 31.00     | 33.17      | 9.00     | 34.36     |
| 100           | 16.62              | 8.91     | 0.01       | 1.28    | 0.69        | 0.16      | 6.17       | 2.42     | 9.20        | 1.04      | 33.19     | 34.98      | 9.45     | 36.23     |
| 110           | 73.21              | 9.17     | 0.01       | 1.17    | 2.23        | 0.14      | 8.40       | 2.02     | 9.79        | 9.81      | 31.81     | 35.85      | 9.13     | 37.00     |
| 120           | 120.62             | 18.90    | <0.01      | 0.63    | 4.65        | 0.14      | 3.96       | 0.54     | 8.42        | <0.01     | 30.05     | 33.51      | 15.70    | 37.00     |
| 130           | 144.21             | 28.05    | <0.01      | 1.90    | 5.67        | 0.30      | 4.52       | 0.56     | 9.17        | <0.01     | 34.25     | 40.89      | 20.70    | 45.83     |
| 140           | 132.92             | 30.21    | 0.01       | 2.17    | 7.89        | 0.32      | 4.70       | 0.57     | 9.38        | <0.01     | 39.23     | 45.90      | 22.84    | 51.27     |
| 150           | 149.95             | 29.36    | 0.01       | 2.18    | 10.50       | 0.28      | 4.45       | 0.60     | 9.98        | <0.01     | 43.49     | 49.84      | 22.46    | 54.66     |
| 160           | 165.45             | 29.54    | 0.01       | 2.27    | 12.30       | 0.25      | 4.61       | 0.64     | 10.60       | <0.01     | 51.66     | 57.78      | 22.19    | 61.90     |
| 170           | 202.16             | 29.13    | 0.01       | 2.28    | 13.32       | 0.25      | 4.95       | 0.64     | 10.63       | <0.01     | 60.45     | 65.86      | 22.04    | 69.45     |
| 180           | 251.57             | 27.04    | 0.01       | 2.13    | 13.71       | 0.23      | 4.82       | 0.59     | 9.87        | <0.01     | 61.27     | 65.83      | 21.56    | 69.27     |

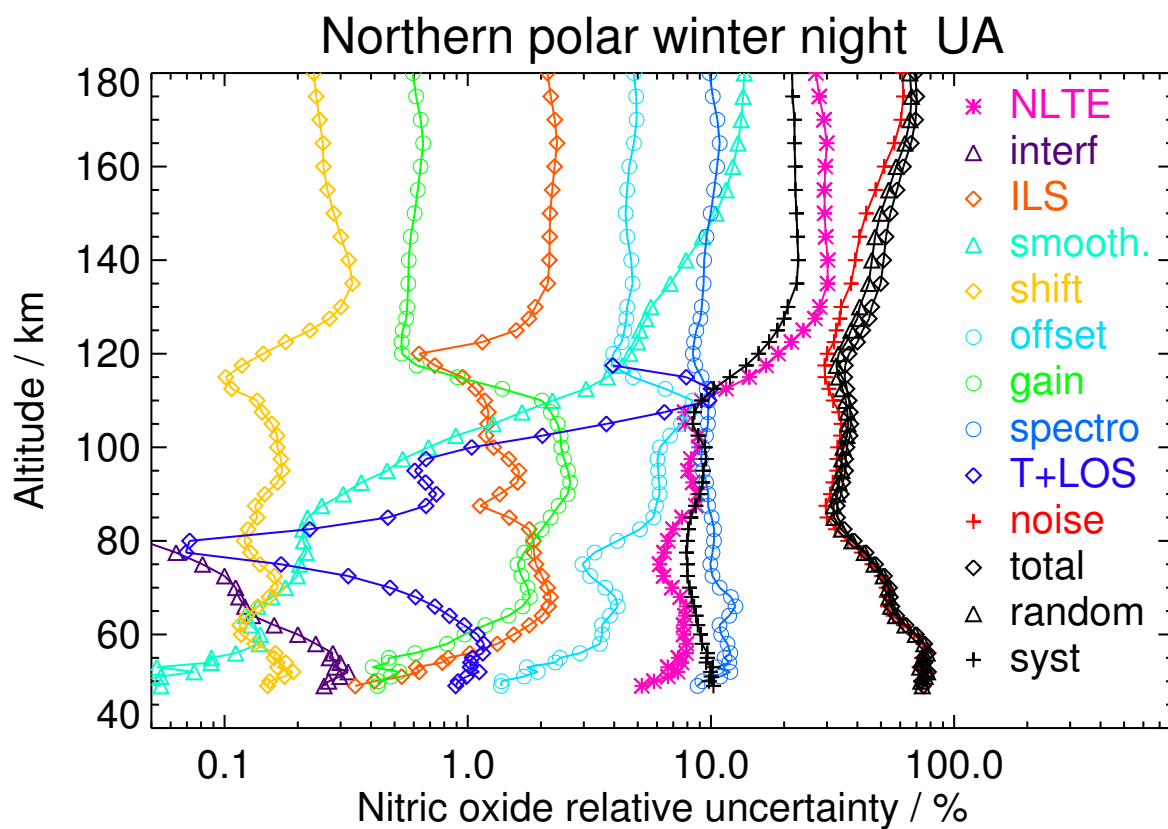

**Figure S104.** V8R\_NOwT\_662 Northern polar winter night

**Table S106.** Nitric oxide error budget for Northern polar spring day. All uncertainties are  $1\sigma$ .

| altitude (km) | mean target (ppmv) | NLTE (%) | interf (%) | ILS (%) | smooth. (%) | shift (%) | offset (%) | gain (%) | spectro (%) | T+LOS (%) | noise (%) | random (%) | syst (%) | total (%) |
|---------------|--------------------|----------|------------|---------|-------------|-----------|------------|----------|-------------|-----------|-----------|------------|----------|-----------|
| 50            | 0.01               | 2.48     | 0.10       | 1.81    | 0.04        | 0.18      | 0.62       | 1.59     | 9.95        | 0.77      | 23.37     | 24.23      | 8.42     | 25.66     |
| 60            | 0.01               | 13.23    | 0.11       | 2.49    | 0.21        | 0.10      | 3.25       | 1.23     | 13.65       | 1.01      | 47.50     | 50.44      | 9.62     | 51.35     |
| 70            | 0.03               | 18.94    | 0.05       | 2.87    | 0.29        | 0.26      | 3.87       | 1.54     | 14.36       | 0.08      | 46.30     | 50.90      | 11.96    | 52.29     |
| 80            | 0.08               | 13.94    | 0.05       | 2.35    | 0.44        | 0.26      | 2.43       | 1.05     | 13.50       | 0.22      | 42.98     | 45.67      | 12.31    | 47.30     |
| 90            | 0.84               | 19.72    | 0.08       | 2.04    | 0.49        | 0.36      | 2.48       | 1.62     | 14.42       | 0.12      | 34.05     | 39.56      | 14.31    | 42.07     |
| 100           | 9.58               | 30.48    | 0.08       | 1.89    | 0.48        | 0.36      | 3.27       | 2.27     | 12.25       | 0.05      | 29.93     | 42.08      | 14.97    | 44.66     |
| 110           | 60.21              | 13.84    | 0.06       | 1.56    | 1.07        | 0.12      | 4.80       | 1.21     | 9.64        | 7.66      | 21.36     | 25.71      | 12.91    | 28.77     |
| 120           | 101.73             | 25.39    | 0.10       | 0.77    | 2.93        | 0.25      | 1.74       | 0.49     | 8.28        | <0.01     | 21.46     | 25.86      | 22.74    | 34.44     |
| 130           | 167.51             | 25.57    | 0.13       | 1.81    | 3.42        | 0.31      | 1.39       | 0.47     | 8.03        | <0.01     | 21.64     | 25.51      | 23.52    | 34.70     |
| 140           | 254.25             | 27.51    | 0.12       | 1.81    | 4.22        | 0.29      | 1.45       | 0.49     | 8.25        | <0.01     | 22.11     | 26.93      | 24.75    | 36.57     |
| 150           | 342.22             | 27.08    | 0.13       | 1.91    | 5.32        | 0.27      | 1.35       | 0.52     | 8.67        | <0.01     | 19.48     | 25.59      | 23.83    | 34.96     |
| 160           | 446.47             | 25.37    | 0.14       | 1.88    | 5.56        | 0.22      | 1.17       | 0.52     | 8.70        | <0.01     | 17.29     | 23.22      | 22.70    | 32.47     |
| 170           | 562.86             | 24.46    | 0.11       | 1.88    | 3.33        | 0.19      | 1.14       | 0.52     | 8.73        | <0.01     | 13.65     | 19.64      | 22.17    | 29.62     |
| 180           | 653.02             | 24.22    | 0.14       | 1.88    | 4.08        | 0.19      | 1.27       | 0.52     | 8.56        | <0.01     | 16.82     | 21.43      | 22.49    | 31.07     |

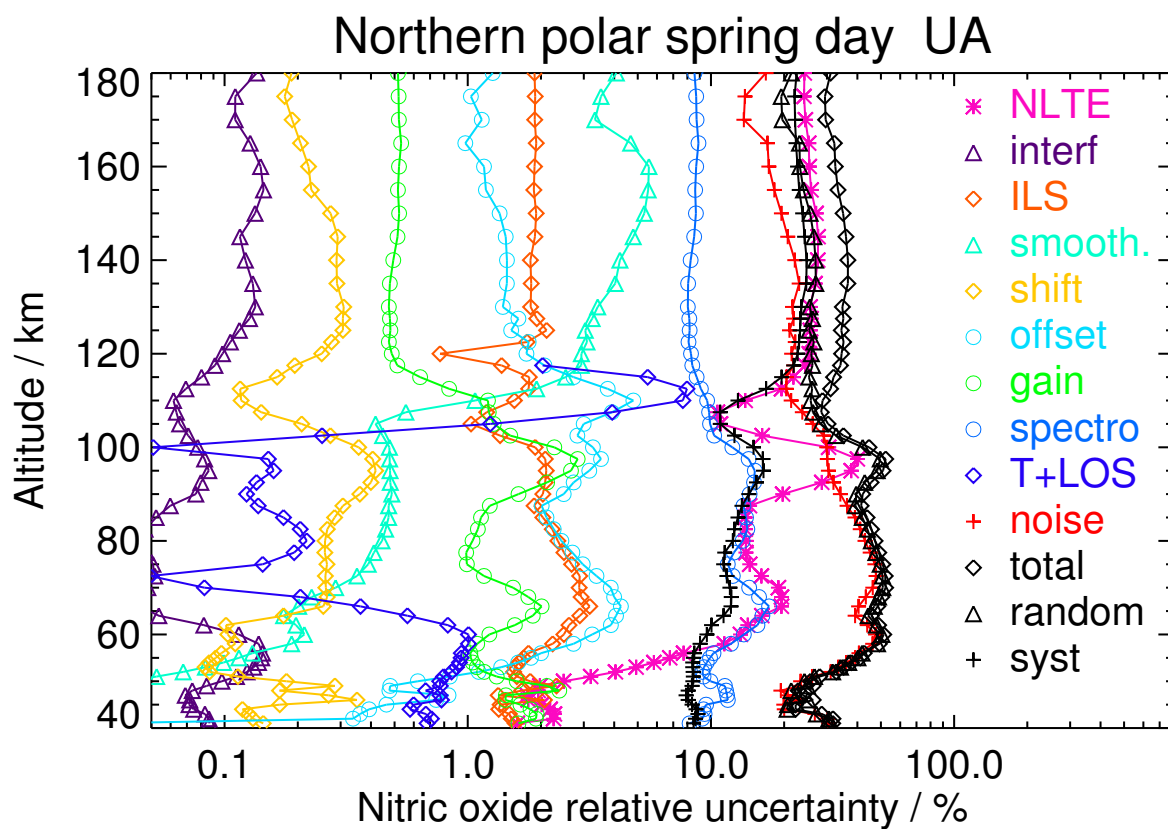

**Figure S105.** V8R\_NOwT\_662 Northern polar spring day

**Table S107.** Nitric oxide error budget for Northern polar spring night. All uncertainties are  $1\sigma$ .

| altitude (km) | mean target (ppmv) | NLTE (%) | interf (%) | ILS (%) | smooth. (%) | shift (%) | offset (%) | gain (%) | spectro (%) | T+LOS (%) | noise (%) | random (%) | syst (%) | total (%) |
|---------------|--------------------|----------|------------|---------|-------------|-----------|------------|----------|-------------|-----------|-----------|------------|----------|-----------|
| 50            | 0.00               | 26.47    | 0.20       | 2.37    | 0.09        | 0.38      | 7.74       | 2.25     | 26.20       | 1.56      | 45.04     | 57.12      | 15.02    | 59.07     |
| 60            | 0.01               | 18.53    | 0.19       | 1.84    | 0.33        | 0.27      | 5.21       | 1.35     | 14.14       | 1.57      | 61.14     | 64.35      | 13.21    | 65.70     |
| 70            | 0.03               | 12.38    | 0.10       | 1.53    | 0.55        | 0.29      | 3.13       | 1.03     | 8.34        | 0.17      | 53.80     | 55.50      | 7.16     | 55.96     |
| 80            | 0.28               | 18.68    | 0.04       | 1.47    | 0.33        | 0.47      | 5.00       | 2.54     | 13.65       | 0.14      | 34.26     | 40.68      | 9.40     | 41.75     |
| 90            | 3.33               | 19.82    | 0.03       | 1.33    | 0.36        | 0.54      | 4.24       | 2.62     | 10.71       | 0.03      | 30.13     | 35.38      | 13.82    | 37.98     |
| 100           | 23.63              | 20.34    | 0.04       | 1.46    | 0.45        | 0.76      | 4.32       | 1.82     | 11.20       | 0.34      | 31.91     | 38.34      | 10.59    | 39.78     |
| 110           | 130.08             | 22.24    | 0.02       | 2.87    | 0.78        | 0.67      | 7.63       | 2.23     | 14.65       | 7.52      | 22.96     | 33.68      | 15.20    | 36.95     |
| 120           | 227.07             | 37.21    | 0.02       | 0.74    | 2.10        | 0.42      | 1.79       | 0.77     | 11.91       | <0.01     | 22.32     | 36.91      | 25.90    | 45.09     |
| 130           | 253.85             | 35.06    | 0.02       | 2.39    | 2.58        | 0.49      | 1.24       | 0.66     | 10.52       | <0.01     | 19.08     | 32.82      | 25.33    | 41.46     |
| 140           | 253.20             | 36.42    | 0.03       | 2.10    | 4.03        | 0.40      | 1.26       | 0.63     | 10.31       | <0.01     | 21.75     | 35.19      | 26.28    | 43.92     |
| 150           | 274.93             | 36.19    | 0.02       | 2.41    | 5.51        | 0.45      | 1.40       | 0.66     | 10.68       | <0.01     | 20.20     | 35.16      | 25.18    | 43.25     |
| 160           | 283.09             | 30.93    | 0.02       | 2.34    | 5.65        | 0.28      | 1.39       | 0.61     | 10.04       | <0.01     | 19.18     | 30.08      | 23.67    | 38.28     |
| 170           | 336.79             | 31.72    | 0.02       | 2.58    | 3.88        | 0.23      | 1.32       | 0.63     | 10.56       | <0.01     | 15.91     | 29.26      | 23.20    | 37.35     |
| 180           | 368.10             | 32.08    | 0.03       | 2.26    | 4.95        | 0.30      | 1.58       | 0.66     | 10.73       | <0.01     | 21.22     | 31.81      | 24.81    | 40.34     |

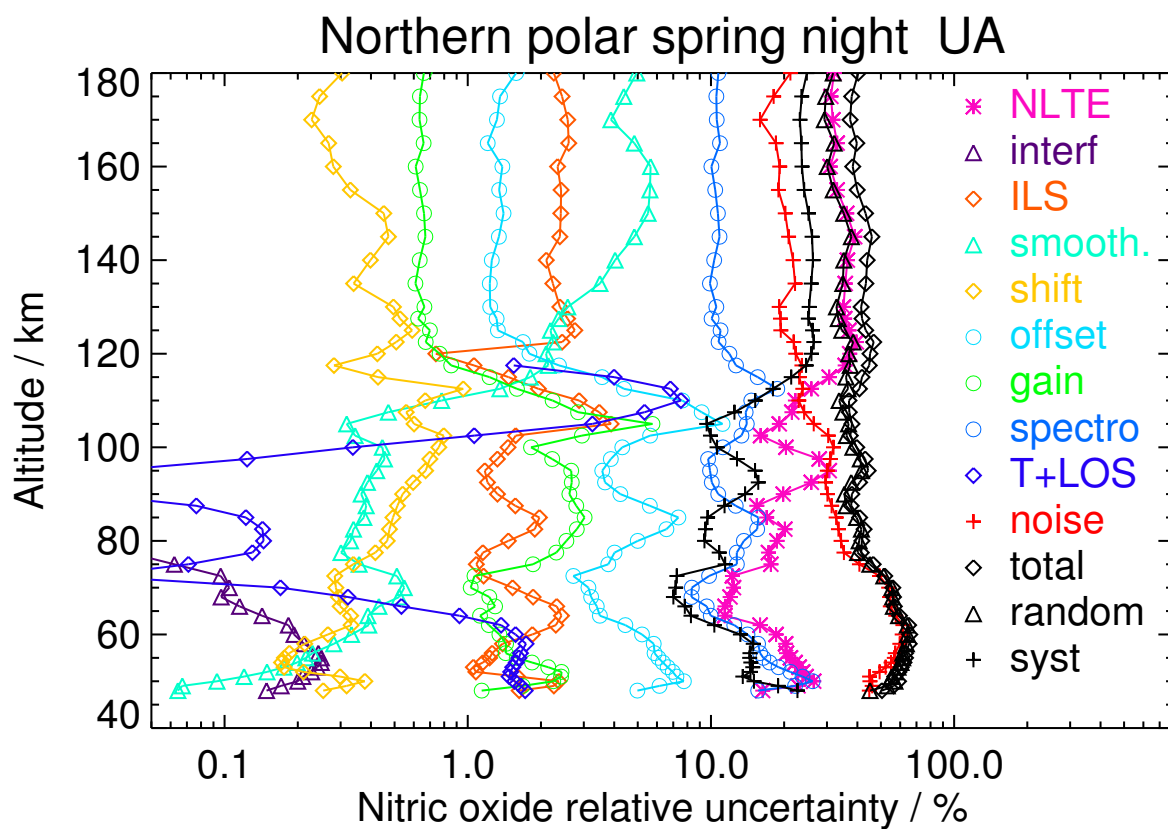

**Figure S106.** V8R\_NOwT\_662 Northern polar spring night

**Table S108.** Nitric oxide error budget for Northern polar summer day. All uncertainties are  $1\sigma$ .

| altitude (km) | mean target (ppmv) | NLTE (%) | interf (%) | ILS (%) | smooth. (%) | shift (%) | offset (%) | gain (%) | spectro (%) | T+LOS (%) | noise (%) | random (%) | syst (%) | total (%) |
|---------------|--------------------|----------|------------|---------|-------------|-----------|------------|----------|-------------|-----------|-----------|------------|----------|-----------|
| 50            | 0.01               | 1.02     | 0.08       | 0.81    | 0.02        | 0.09      | 0.28       | 1.06     | 8.28        | 0.56      | 17.90     | 18.04      | 8.18     | 19.80     |
| 60            | 0.01               | 4.71     | 0.14       | 1.69    | 0.11        | 0.12      | 1.91       | 0.88     | 9.77        | 0.71      | 43.75     | 44.34      | 8.56     | 45.16     |
| 70            | 0.01               | 5.86     | 0.04       | 2.02    | 0.28        | 0.16      | 2.23       | 1.07     | 10.77       | 0.10      | 49.57     | 50.18      | 9.99     | 51.17     |
| 80            | 0.02               | 8.78     | 0.03       | 0.86    | 0.37        | 0.18      | 1.42       | 0.79     | 10.16       | 0.22      | 41.96     | 42.49      | 11.79    | 44.10     |
| 90            | 0.53               | 14.05    | 0.03       | 1.30    | 0.52        | 0.24      | 2.51       | 1.03     | 10.87       | 0.27      | 39.01     | 41.23      | 12.12    | 42.98     |
| 100           | 8.98               | 9.26     | 0.02       | 2.29    | 0.35        | 0.15      | 3.69       | 1.59     | 10.30       | 1.33      | 31.52     | 33.40      | 9.65     | 34.77     |
| 110           | 34.33              | 14.57    | 0.02       | 5.37    | 1.47        | 0.11      | 7.49       | 2.00     | 9.68        | 16.01     | 19.70     | 28.89      | 14.38    | 32.27     |
| 120           | 73.43              | 21.38    | 0.03       | 1.56    | 3.90        | 0.09      | 3.13       | 0.48     | 8.40        | <0.01     | 25.92     | 29.25      | 19.28    | 35.03     |
| 130           | 159.79             | 26.57    | 0.03       | 2.62    | 4.77        | 0.27      | 3.13       | 0.51     | 8.66        | <0.01     | 29.55     | 34.60      | 22.30    | 41.16     |
| 140           | 240.76             | 27.80    | 0.04       | 2.64    | 5.66        | 0.47      | 2.58       | 0.58     | 9.39        | <0.01     | 28.19     | 34.73      | 22.26    | 41.25     |
| 150           | 320.30             | 27.43    | 0.03       | 2.27    | 5.98        | 0.36      | 2.12       | 0.63     | 10.08       | <0.01     | 24.48     | 32.23      | 21.46    | 38.72     |
| 160           | 383.09             | 24.07    | 0.03       | 1.93    | 5.39        | 0.26      | 1.86       | 0.58     | 9.37        | <0.01     | 23.04     | 28.41      | 20.67    | 35.14     |
| 170           | 501.57             | 24.06    | 0.03       | 1.93    | 4.58        | 0.23      | 1.89       | 0.60     | 9.72        | <0.01     | 22.83     | 28.20      | 20.68    | 34.97     |
| 180           | 553.14             | 24.20    | 0.03       | 1.92    | 5.23        | 0.24      | 2.18       | 0.61     | 9.87        | <0.01     | 29.66     | 34.14      | 20.81    | 39.98     |

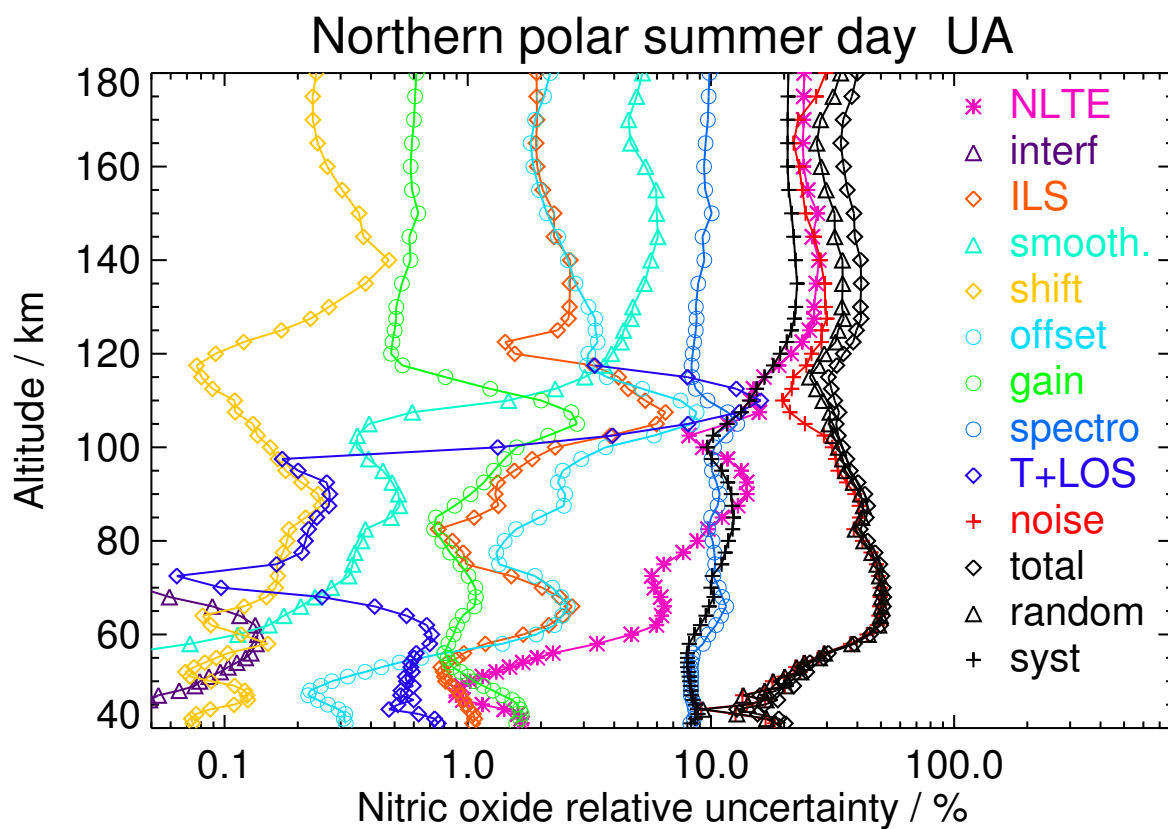

**Figure S107.** V8R\_NOwT\_662 Northern polar summer day



**Table S109.** Nitric oxide error budget for Northern polar summer night. All uncertainties are  $1\sigma$ .

| altitude (km) | mean target (ppmv) | NLTE (%) | interf (%) | ILS (%) | smooth. (%) | shift (%) | offset (%) | gain (%) | spectro (%) | T+LOS (%) | noise (%) | random (%) | syst (%) | total (%) |
|---------------|--------------------|----------|------------|---------|-------------|-----------|------------|----------|-------------|-----------|-----------|------------|----------|-----------|
| 50            | 0.00               | 4.42     | 0.25       | 0.38    | 0.10        | 0.13      | 1.52       | 0.99     | 4.46        | 0.78      | 41.17     | 41.54      | 3.59     | 41.70     |
| 60            | 0.00               | 11.80    | 0.23       | 2.23    | 0.29        | 0.14      | 3.47       | 0.75     | 11.02       | 1.23      | 59.52     | 61.44      | 6.90     | 61.83     |
| 80            | 0.09               | 15.57    | 0.05       | 2.59    | 0.34        | 0.34      | 2.34       | 0.78     | 11.75       | 0.23      | 42.66     | 42.73      | 19.68    | 47.04     |
| 90            | 1.24               | 17.08    | 0.05       | 1.39    | 0.57        | 0.51      | 2.56       | 1.38     | 9.60        | 0.24      | 37.81     | 40.72      | 12.91    | 42.72     |
| 100           | 19.45              | 21.33    | 0.03       | 0.84    | 0.36        | 0.60      | 3.94       | 3.00     | 11.84       | 1.46      | 27.68     | 35.31      | 11.94    | 37.28     |
| 110           | 39.38              | 18.04    | 0.02       | 3.01    | 1.30        | 0.18      | 6.94       | 1.77     | 11.43       | 14.51     | 22.21     | 32.10      | 13.85    | 34.96     |
| 120           | 96.83              | 38.78    | 0.03       | 0.97    | 2.74        | 0.25      | 2.33       | 0.80     | 13.90       | <0.01     | 23.44     | 41.81      | 22.65    | 47.55     |
| 130           | 159.85             | 39.15    | 0.02       | 2.99    | 3.53        | 0.50      | 2.00       | 0.72     | 12.17       | <0.01     | 24.19     | 41.45      | 23.96    | 47.88     |
| 140           | 144.53             | 36.47    | 0.02       | 2.75    | 5.35        | 0.45      | 2.04       | 0.68     | 11.18       | <0.01     | 26.47     | 40.07      | 24.31    | 46.87     |
| 150           | 186.89             | 38.11    | 0.03       | 2.99    | 6.12        | 0.48      | 2.08       | 0.76     | 12.34       | <0.01     | 24.92     | 41.54      | 23.48    | 47.72     |
| 160           | 212.64             | 33.91    | 0.03       | 2.77    | 6.21        | 0.43      | 2.01       | 0.73     | 11.88       | <0.01     | 24.64     | 37.90      | 22.65    | 44.15     |
| 170           | 295.07             | 32.91    | 0.03       | 2.66    | 4.75        | 0.32      | 1.80       | 0.73     | 11.95       | <0.01     | 22.21     | 34.93      | 23.08    | 41.86     |
| 180           | 361.91             | 30.78    | 0.03       | 2.31    | 5.32        | 0.31      | 1.93       | 0.68     | 11.21       | <0.01     | 27.32     | 35.87      | 23.90    | 43.10     |

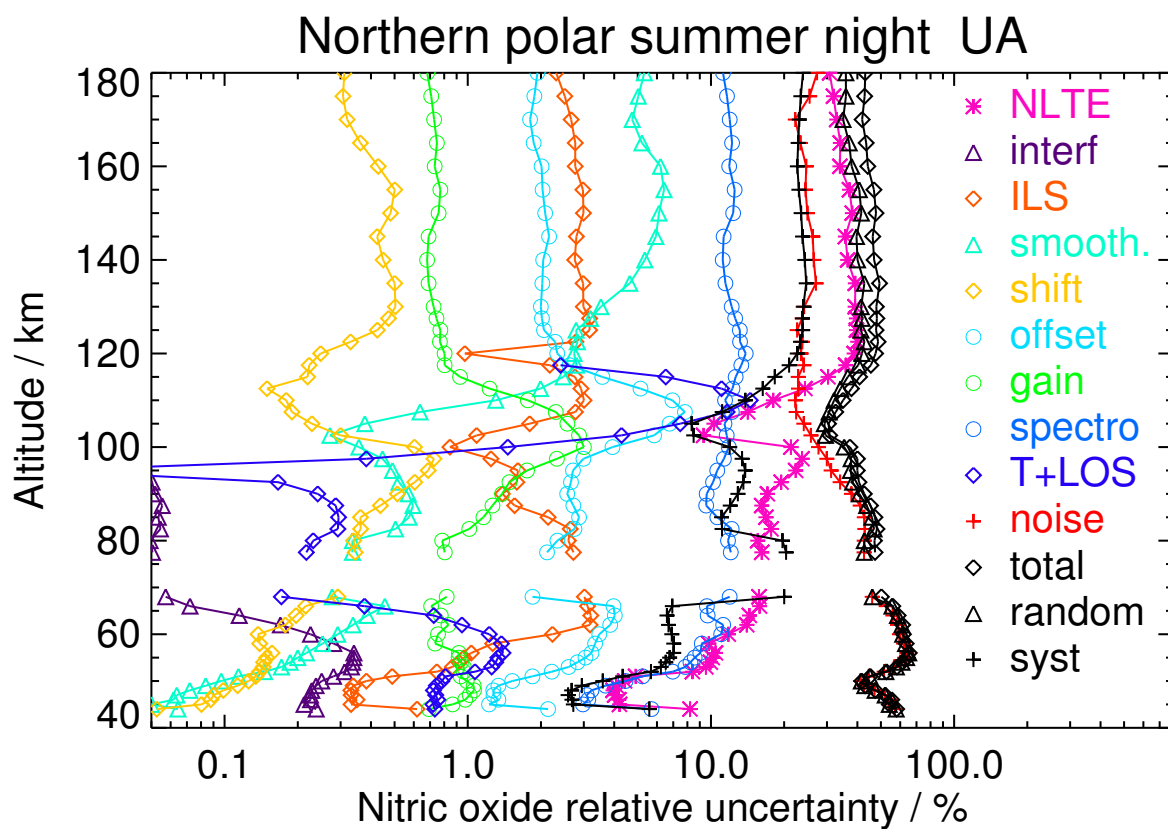

**Figure S108.** V8R\_NOwT\_662 Northern polar summer night

**Table S110.** Nitric oxide error budget for Northern polar autumn day. All uncertainties are  $1\sigma$ .

| altitude (km) | mean target (ppmv) | NLTE (%) | interf (%) | ILS (%) | smooth. (%) | shift (%) | offset (%) | gain (%) | spectro (%) | T+LOS (%) | noise (%) | random (%) | syst (%) | total (%) |
|---------------|--------------------|----------|------------|---------|-------------|-----------|------------|----------|-------------|-----------|-----------|------------|----------|-----------|
| 50            | 0.00               | 7.90     | 0.14       | 1.59    | 0.13        | 0.09      | 1.70       | 1.55     | 11.31       | 0.80      | 44.75     | 45.57      | 11.14    | 46.91     |
| 60            | 0.01               | 15.43    | 0.10       | 2.24    | 0.16        | 0.07      | 3.50       | 1.12     | 13.94       | 0.59      | 55.21     | 56.85      | 16.32    | 59.15     |
| 70            | 0.03               | 25.83    | 0.03       | 3.28    | 0.17        | 0.16      | 5.24       | 1.55     | 20.02       | 0.02      | 44.88     | 51.41      | 21.91    | 55.88     |
| 80            | 0.12               | 11.97    | 0.02       | 1.79    | 0.28        | 0.15      | 2.36       | 1.32     | 14.97       | 0.13      | 40.65     | 42.92      | 13.71    | 45.06     |
| 90            | 1.57               | 17.76    | 0.01       | 1.91    | 0.34        | 0.19      | 4.03       | 2.18     | 19.04       | 0.10      | 31.72     | 38.54      | 14.94    | 41.34     |
| 100           | 9.44               | 20.79    | 0.02       | 1.87    | 0.46        | 0.21      | 3.40       | 1.67     | 15.49       | 0.09      | 31.99     | 38.81      | 14.39    | 41.39     |
| 110           | 53.15              | 14.83    | 0.01       | 1.00    | 1.34        | 0.10      | 5.19       | 1.09     | 10.11       | 4.05      | 24.37     | 28.60      | 12.08    | 31.04     |
| 120           | 105.13             | 25.42    | 0.02       | 0.93    | 3.35        | 0.24      | 2.14       | 0.53     | 8.92        | <0.01     | 22.11     | 28.15      | 20.96    | 35.09     |
| 130           | 147.91             | 30.32    | 0.02       | 2.10    | 3.86        | 0.26      | 2.16       | 0.55     | 9.36        | <0.01     | 23.67     | 32.11      | 23.67    | 39.89     |
| 140           | 158.46             | 32.15    | 0.04       | 2.08    | 5.81        | 0.30      | 2.46       | 0.55     | 9.29        | <0.01     | 27.69     | 36.39      | 24.64    | 43.94     |
| 150           | 200.37             | 27.74    | 0.04       | 2.00    | 7.17        | 0.29      | 2.36       | 0.53     | 8.78        | <0.01     | 25.35     | 32.07      | 22.85    | 39.38     |
| 160           | 289.32             | 28.22    | 0.03       | 2.20    | 6.61        | 0.30      | 2.01       | 0.59     | 9.75        | <0.01     | 22.36     | 31.25      | 21.65    | 38.01     |
| 170           | 394.52             | 31.58    | 0.02       | 2.58    | 5.22        | 0.35      | 1.91       | 0.68     | 11.36       | <0.01     | 20.03     | 33.22      | 21.50    | 39.57     |
| 180           | 428.50             | 32.58    | 0.02       | 2.73    | 6.13        | 0.38      | 2.14       | 0.72     | 11.99       | <0.01     | 26.31     | 38.43      | 21.71    | 44.13     |

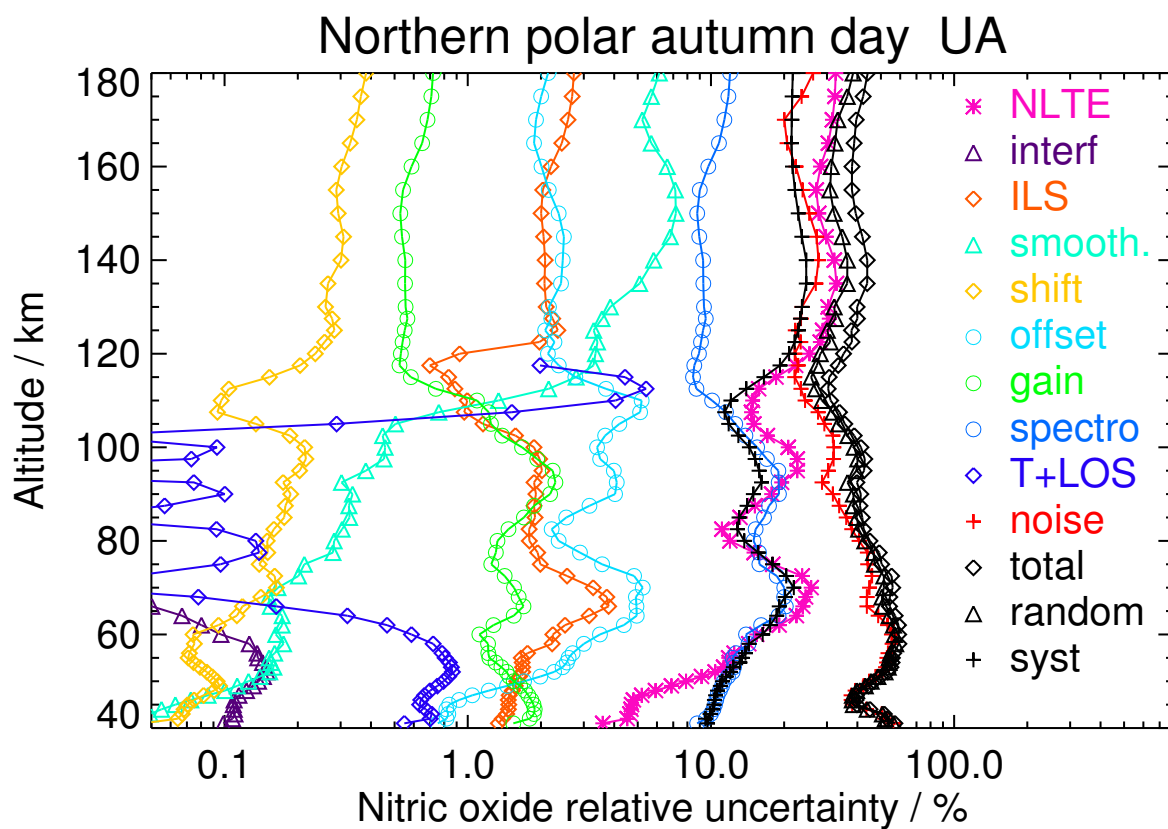

**Figure S109.** V8R\_NOwT\_662 Northern polar autumn day

**Table S111.** Nitric oxide error budget for Northern polar autumn night. All uncertainties are  $1\sigma$ .

| altitude<br>(km) | mean target<br>(ppmv) | NLTE<br>(%) | interf<br>(%) | ILS<br>(%) | smooth.<br>(%) | shift<br>(%) | offset<br>(%) | gain<br>(%) | spectro<br>(%) | T+LOS<br>(%) | noise<br>(%) | random<br>(%) | syst<br>(%) | total<br>(%) |
|------------------|-----------------------|-------------|---------------|------------|----------------|--------------|---------------|-------------|----------------|--------------|--------------|---------------|-------------|--------------|
| 50               | 0.00                  | 8.61        | 0.20          | 0.84       | 0.18           | 0.16         | 3.34          | 0.85        | 9.22           | 2.16         | 70.13        | 71.03         | 7.11        | 71.38        |
| 60               | 0.01                  | 8.70        | 0.11          | 1.59       | 0.19           | 0.07         | 2.84          | 0.97        | 10.44          | 1.86         | 49.56        | 50.97         | 7.67        | 51.54        |
| 70               | 0.05                  | 8.59        | 0.07          | 2.47       | 0.25           | 0.14         | 3.35          | 1.70        | 10.81          | 0.98         | 50.75        | 52.25         | 7.54        | 52.80        |
| 80               | 0.31                  | 13.53       | 0.04          | 2.72       | 0.42           | 0.19         | 3.33          | 1.48        | 11.67          | 0.09         | 42.64        | 45.64         | 8.69        | 46.46        |
| 90               | 3.07                  | 20.00       | 0.02          | 1.23       | 0.43           | 0.14         | 7.32          | 3.30        | 13.19          | 0.73         | 32.62        | 39.21         | 12.94       | 41.29        |
| 100              | 24.93                 | 12.40       | 0.02          | 1.63       | 0.54           | 0.31         | 7.76          | 3.50        | 12.92          | 0.56         | 34.20        | 37.89         | 11.45       | 39.58        |
| 110              | 76.57                 | 19.11       | 0.01          | 0.93       | 1.38           | 0.19         | 9.55          | 2.66        | 14.14          | 8.40         | 26.03        | 35.17         | 13.33       | 37.61        |
| 120              | 99.38                 | 27.63       | 0.01          | 1.26       | 3.49           | 0.26         | 3.26          | 0.64        | 10.33          | <0.01        | 27.50        | 35.55         | 19.68       | 40.63        |
| 130              | 117.69                | 40.94       | 0.01          | 2.41       | 4.74           | 0.40         | 3.73          | 0.73        | 12.16          | <0.01        | 30.91        | 47.60         | 23.59       | 53.12        |
| 140              | 128.32                | 54.00       | <0.01         | 3.40       | 6.67           | 0.63         | 4.23          | 0.85        | 14.05          | <0.01        | 35.35        | 61.63         | 25.28       | 66.62        |
| 150              | 109.64                | 42.67       | 0.01          | 3.10       | 8.32           | 0.54         | 3.57          | 0.83        | 13.69          | <0.01        | 33.43        | 52.30         | 21.97       | 56.73        |
| 160              | 110.18                | 40.70       | 0.02          | 3.13       | 8.30           | 0.41         | 3.30          | 0.87        | 14.53          | <0.01        | 35.62        | 52.94         | 20.59       | 56.81        |
| 170              | 106.66                | 33.31       | 0.01          | 2.60       | 8.46           | 0.28         | 3.52          | 0.73        | 12.23          | <0.01        | 42.44        | 52.26         | 20.50       | 56.14        |
| 180              | 141.91                | 28.50       | 0.01          | 2.23       | 9.03           | 0.24         | 3.36          | 0.62        | 10.48          | <0.01        | 44.02        | 50.29         | 20.73       | 54.39        |

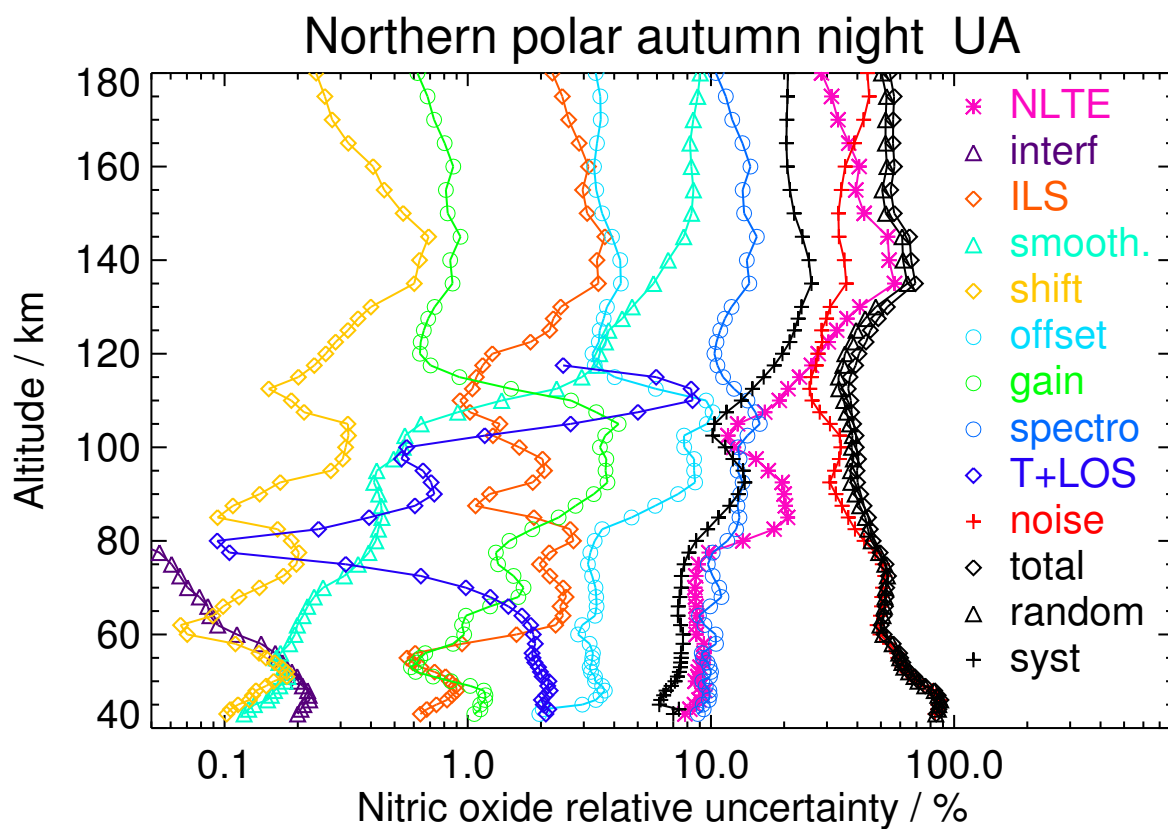

**Figure S110.** V8R\_NOwT\_662 Northern polar autumn night

**Table S112.** Nitric oxide error budget for Northern midlatitude winter day. All uncertainties are  $1\sigma$ .

| altitude<br>(km) | mean target<br>(ppmv) | NLTE<br>(%) | interf<br>(%) | ILS<br>(%) | smooth.<br>(%) | shift<br>(%) | offset<br>(%) | gain<br>(%) | spectro<br>(%) | T+LOS<br>(%) | noise<br>(%) | random<br>(%) | syst<br>(%) | total<br>(%) |
|------------------|-----------------------|-------------|---------------|------------|----------------|--------------|---------------|-------------|----------------|--------------|--------------|---------------|-------------|--------------|
| 40               | 0.01                  | 5.35        | 0.05          | 1.42       | 0.03           | 0.08         | 0.48          | 1.90        | 9.28           | 0.80         | 27.55        | 27.78         | 10.43       | 29.67        |
| 50               | 0.00                  | 2.86        | 0.11          | 1.29       | 0.13           | 0.10         | 0.95          | 1.29        | 8.96           | 0.61         | 37.62        | 37.84         | 8.73        | 38.84        |
| 60               | 0.00                  | 6.92        | 0.10          | 1.44       | 0.38           | 0.04         | 2.76          | 0.87        | 8.41           | 0.44         | 61.26        | 61.89         | 7.18        | 62.30        |
| 70               | 0.02                  | 6.85        | 0.04          | 1.49       | 0.45           | 0.11         | 2.76          | 0.54        | 6.48           | 0.04         | 60.10        | 60.44         | 7.63        | 60.92        |
| 80               | 0.07                  | 9.47        | 0.02          | 1.20       | 0.58           | 0.16         | 1.09          | 0.65        | 7.87           | 0.13         | 50.54        | 51.25         | 9.10        | 52.05        |
| 90               | 0.43                  | 12.91       | 0.02          | 1.02       | 0.93           | 0.13         | 1.97          | 0.61        | 7.19           | 0.09         | 49.45        | 50.36         | 11.54       | 51.67        |
| 100              | 2.75                  | 12.93       | 0.01          | 1.01       | 1.03           | 0.13         | 2.07          | 0.71        | 8.57           | 0.06         | 40.25        | 41.65         | 11.51       | 43.21        |
| 110              | 13.82                 | 10.13       | 0.01          | 1.11       | 2.47           | 0.10         | 4.30          | 0.98        | 9.52           | 5.18         | 37.73        | 39.92         | 8.77        | 40.87        |
| 120              | 27.52                 | 18.84       | 0.01          | 0.90       | 4.81           | 0.17         | 3.26          | 0.68        | 11.21          | <0.01        | 32.13        | 37.53         | 11.81       | 39.35        |
| 130              | 51.25                 | 20.16       | 0.01          | 2.02       | 6.45           | 0.19         | 3.88          | 0.53        | 8.83           | <0.01        | 33.84        | 37.73         | 16.35       | 41.12        |
| 140              | 96.18                 | 23.79       | 0.02          | 1.70       | 7.68           | 0.19         | 4.60          | 0.52        | 8.58           | <0.01        | 35.12        | 38.75         | 21.33       | 44.23        |
| 150              | 177.39                | 28.87       | 0.02          | 2.19       | 7.69           | 0.25         | 3.94          | 0.64        | 10.54          | <0.01        | 30.85        | 38.58         | 22.09       | 44.45        |
| 160              | 218.24                | 27.56       | 0.02          | 2.10       | 6.84           | 0.19         | 2.94          | 0.62        | 10.25          | <0.01        | 26.92        | 34.31         | 21.73       | 40.61        |
| 170              | 255.24                | 23.88       | 0.02          | 1.84       | 7.01           | 0.15         | 2.69          | 0.55        | 9.03           | <0.01        | 29.86        | 34.24         | 20.76       | 40.04        |
| 180              | 266.34                | 23.02       | 0.02          | 1.79       | 7.66           | 0.15         | 2.83          | 0.53        | 8.78           | <0.01        | 35.55        | 39.13         | 20.25       | 44.06        |

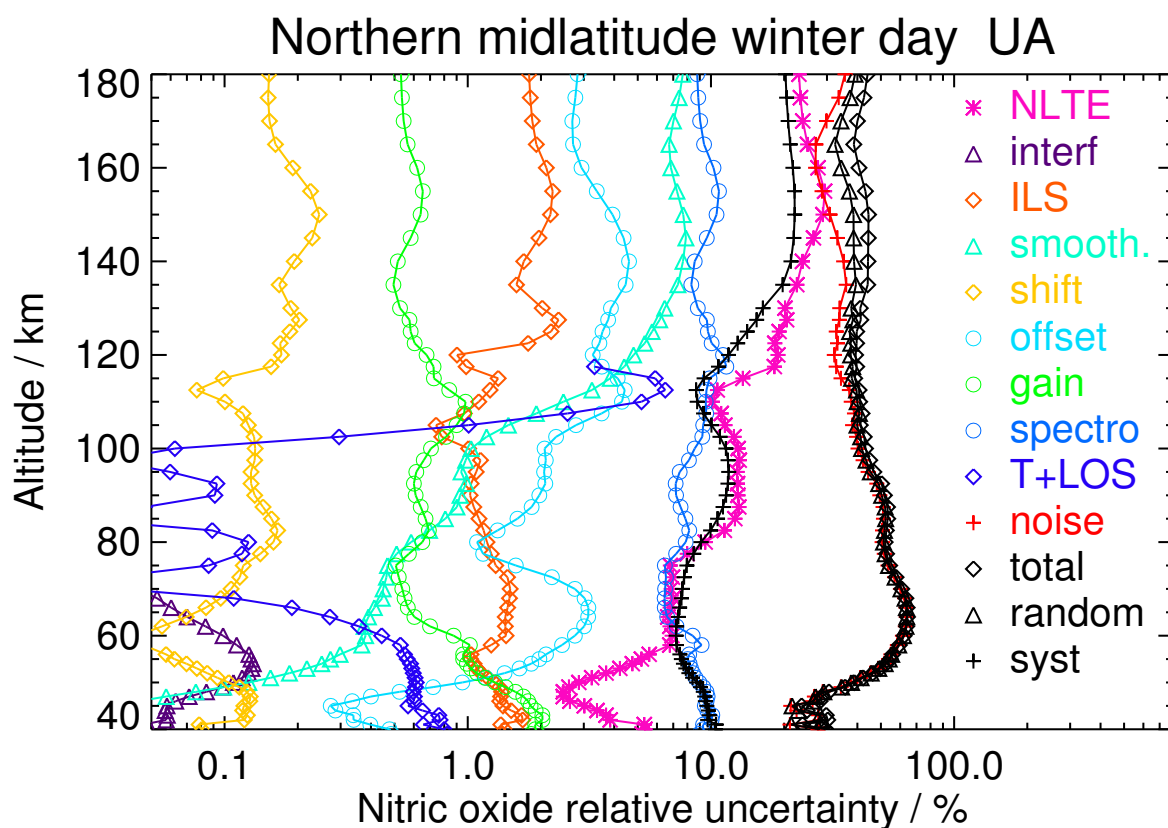

**Figure S111.** V8R\_NOWT\_662 Northern midlatitude winter day

**Table S113.** Nitric oxide error budget for Northern midlatitude winter night. All uncertainties are  $1\sigma$ .

| altitude (km) | mean target (ppmv) | NLTE (%) | interf (%) | ILS (%) | smooth. (%) | shift (%) | offset (%) | gain (%) | spectro (%) | T+LOS (%) | noise (%) | random (%) | syst (%) | total (%) |
|---------------|--------------------|----------|------------|---------|-------------|-----------|------------|----------|-------------|-----------|-----------|------------|----------|-----------|
| 60            | 0.01               | 3.58     | 0.22       | 1.04    | 0.31        | 0.10      | 4.61       | 0.53     | 8.55        | 0.72      | 83.78     | 84.16      | 6.67     | 84.43     |
| 70            | 0.02               | 4.71     | 0.14       | 1.29    | 0.53        | 0.10      | 4.35       | 1.01     | 7.80        | 0.23      | 76.17     | 76.58      | 6.50     | 76.86     |
| 80            | 0.10               | 8.53     | 0.08       | 1.55    | 0.59        | 0.22      | 2.81       | 2.65     | 11.06       | 0.15      | 60.47     | 61.82      | 6.92     | 62.21     |
| 90            | 0.81               | 13.19    | 0.04       | 1.78    | 0.73        | 0.18      | 3.07       | 3.28     | 12.37       | 0.46      | 49.84     | 52.60      | 8.24     | 53.24     |
| 100           | 8.03               | 14.28    | 0.02       | 2.56    | 0.79        | 0.16      | 4.34       | 3.91     | 13.47       | 1.59      | 38.57     | 42.93      | 8.56     | 43.78     |
| 110           | 32.65              | 19.66    | 0.03       | 5.34    | 2.31        | 0.17      | 8.42       | 4.35     | 22.36       | 12.10     | 34.67     | 47.91      | 7.95     | 48.57     |
| 120           | 46.29              | 32.33    | 0.02       | 4.12    | 4.83        | 0.26      | 4.77       | 1.05     | 14.48       | <0.01     | 35.19     | 48.69      | 13.67    | 50.57     |
| 130           | 46.97              | 44.11    | 0.01       | 3.73    | 6.37        | 0.48      | 5.04       | 0.96     | 15.46       | <0.01     | 38.94     | 58.54      | 18.85    | 61.50     |
| 140           | 55.45              | 50.60    | 0.01       | 4.42    | 7.90        | 0.64      | 5.18       | 0.95     | 15.79       | <0.01     | 42.84     | 65.48      | 21.60    | 68.96     |
| 150           | 66.99              | 47.39    | 0.01       | 4.01    | 8.84        | 0.57      | 5.23       | 0.97     | 16.21       | <0.01     | 49.01     | 67.33      | 22.35    | 70.95     |
| 160           | 76.62              | 41.54    | 0.01       | 3.34    | 9.12        | 0.38      | 5.46       | 0.91     | 15.21       | <0.01     | 56.51     | 69.17      | 22.16    | 72.63     |
| 170           | 85.33              | 35.77    | 0.01       | 2.79    | 9.45        | 0.26      | 5.96       | 0.80     | 13.56       | <0.01     | 65.98     | 73.94      | 21.98    | 77.14     |
| 180           | 120.20             | 30.83    | 0.01       | 2.37    | 9.67        | 0.21      | 5.71       | 0.70     | 11.79       | <0.01     | 66.08     | 71.38      | 22.20    | 74.76     |

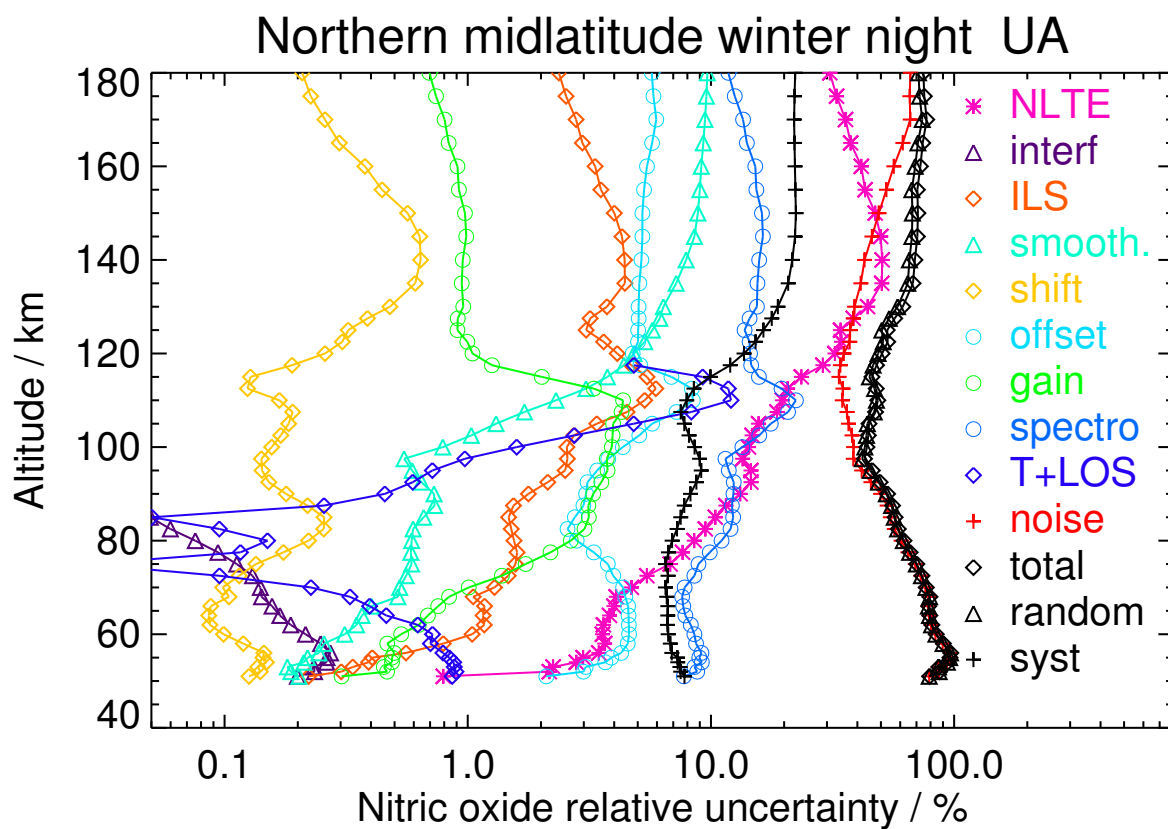

**Figure S112.** V8R\_NOwT\_662 Northern midlatitude winter night

**Table S114.** Nitric oxide error budget for Northern midlatitude spring day. All uncertainties are  $1\sigma$ .

| altitude (km) | mean target (ppmv) | NLTE (%) | interf (%) | ILS (%) | smooth. (%) | shift (%) | offset (%) | gain (%) | spectro (%) | T+LOS (%) | noise (%) | random (%) | syst (%) | total (%) |
|---------------|--------------------|----------|------------|---------|-------------|-----------|------------|----------|-------------|-----------|-----------|------------|----------|-----------|
| 50            | 0.00               | 2.48     | 0.10       | 1.37    | 0.07        | 0.09      | 0.54       | 1.39     | 9.73        | 0.67      | 27.98     | 28.40      | 9.05     | 29.80     |
| 60            | 0.00               | 13.09    | 0.12       | 2.30    | 0.43        | 0.10      | 2.48       | 1.07     | 13.25       | 0.79      | 61.56     | 63.61      | 10.23    | 64.42     |
| 70            | 0.01               | 4.85     | 0.04       | 2.07    | 0.52        | 0.06      | 1.85       | 0.72     | 10.21       | 0.03      | 53.20     | 53.24      | 11.50    | 54.46     |
| 80            | 0.04               | 18.90    | 0.03       | 2.22    | 0.64        | 0.22      | 1.60       | 1.01     | 15.40       | 0.20      | 52.29     | 55.40      | 16.37    | 57.77     |
| 90            | 0.51               | 25.93    | 0.03       | 2.80    | 0.68        | 0.31      | 2.48       | 1.32     | 18.79       | 0.08      | 45.26     | 52.66      | 17.83    | 55.59     |
| 100           | 4.08               | 25.83    | 0.03       | 2.30    | 0.69        | 0.38      | 3.08       | 1.35     | 18.74       | 0.07      | 38.20     | 46.46      | 18.33    | 49.95     |
| 110           | 30.50              | 18.42    | 0.02       | 1.87    | 1.44        | 0.17      | 4.83       | 1.30     | 11.78       | 6.14      | 27.82     | 33.48      | 14.11    | 36.33     |
| 120           | 96.72              | 29.20    | 0.02       | 0.92    | 3.44        | 0.23      | 2.26       | 0.52     | 8.91        | <0.01     | 24.09     | 32.28      | 22.10    | 39.12     |
| 130           | 191.03             | 26.92    | 0.02       | 1.79    | 3.99        | 0.27      | 2.23       | 0.50     | 8.46        | <0.01     | 25.85     | 30.24      | 23.97    | 38.59     |
| 140           | 257.42             | 27.12    | 0.02       | 1.73    | 4.95        | 0.23      | 1.81       | 0.47     | 8.00        | <0.01     | 23.85     | 27.30      | 25.58    | 37.41     |
| 150           | 325.46             | 24.12    | 0.03       | 1.70    | 5.27        | 0.19      | 1.34       | 0.47     | 7.91        | <0.01     | 19.35     | 22.73      | 23.13    | 32.43     |
| 160           | 377.46             | 22.10    | 0.03       | 1.68    | 5.30        | 0.16      | 1.17       | 0.47     | 7.81        | <0.01     | 17.98     | 20.91      | 21.63    | 30.09     |
| 170           | 459.02             | 21.25    | 0.02       | 1.71    | 3.60        | 0.14      | 1.12       | 0.47     | 7.85        | <0.01     | 13.84     | 16.98      | 20.83    | 26.87     |
| 180           | 497.42             | 21.67    | 0.03       | 1.78    | 4.63        | 0.19      | 1.43       | 0.48     | 7.92        | <0.01     | 19.37     | 22.25      | 20.96    | 30.57     |

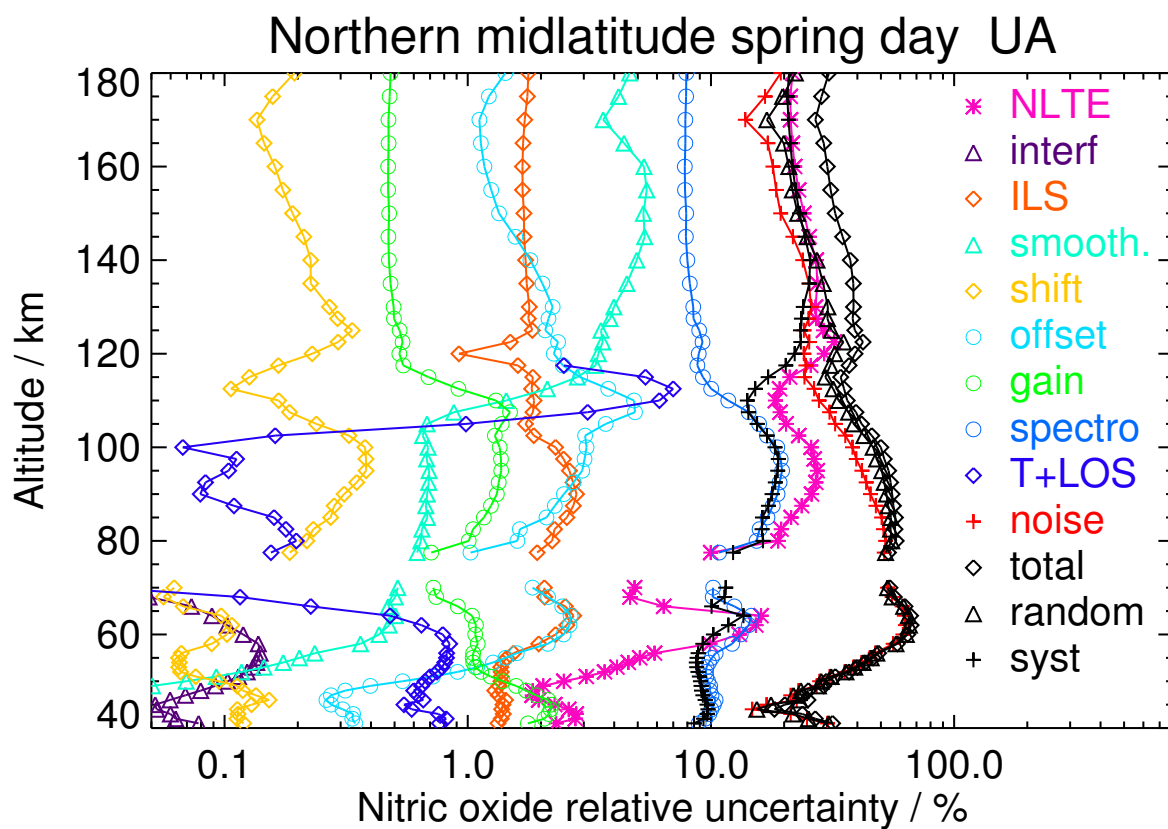

**Figure S113.** V8R\_NOwT\_662 Northern midlatitude spring day

**Table S115.** Nitric oxide error budget for Northern midlatitude spring night. All uncertainties are  $1\sigma$ .

| altitude (km) | mean target (ppmv) | NLTE (%) | interf (%) | ILS (%) | smooth. (%) | shift (%) | offset (%) | gain (%) | spectro (%) | T+LOS (%) | noise (%) | random (%) | syst (%) | total (%) |
|---------------|--------------------|----------|------------|---------|-------------|-----------|------------|----------|-------------|-----------|-----------|------------|----------|-----------|
| 60            | 0.00               | 13.33    | 0.26       | 2.42    | 0.44        | 0.12      | 5.21       | 0.81     | 8.96        | 1.30      | 73.26     | 74.94      | 6.74     | 75.24     |
| 70            | 0.02               | 22.43    | 0.12       | 1.19    | 0.27        | 0.09      | 6.22       | 1.01     | 18.12       | 0.18      | 51.57     | 57.92      | 13.33    | 59.43     |
| 80            | 0.13               | 12.77    | 0.05       | 1.89    | 0.37        | 0.24      | 4.47       | 1.41     | 18.48       | 0.16      | 46.01     | 50.61      | 9.30     | 51.46     |
| 90            | 0.68               | 21.83    | 0.07       | 2.88    | 1.04        | 0.45      | 3.18       | 1.60     | 14.08       | 0.04      | 51.65     | 57.14      | 9.96     | 58.00     |
| 100           | 5.41               | 28.04    | 0.04       | 2.53    | 0.89        | 0.51      | 2.91       | 2.15     | 11.81       | 0.36      | 40.25     | 49.69      | 9.86     | 50.66     |
| 110           | 27.76              | 19.88    | 0.03       | 2.56    | 2.08        | 0.12      | 7.47       | 1.94     | 11.52       | 10.48     | 31.72     | 39.94      | 10.93    | 41.40     |
| 120           | 58.12              | 29.94    | 0.03       | 0.95    | 4.32        | 0.27      | 3.48       | 0.69     | 11.85       | <0.01     | 28.84     | 40.01      | 17.33    | 43.60     |
| 130           | 60.63              | 29.22    | 0.02       | 2.50    | 5.65        | 0.35      | 3.63       | 0.60     | 10.26       | <0.01     | 31.54     | 40.40      | 19.33    | 44.78     |
| 140           | 67.51              | 26.02    | 0.02       | 2.02    | 7.20        | 0.26      | 3.76       | 0.54     | 9.16        | <0.01     | 35.58     | 40.78      | 20.84    | 45.80     |
| 150           | 94.96              | 27.02    | 0.02       | 2.11    | 7.43        | 0.25      | 3.46       | 0.59     | 9.77        | <0.01     | 36.40     | 41.95      | 21.51    | 47.14     |
| 160           | 100.49             | 26.63    | 0.02       | 2.13    | 7.35        | 0.21      | 3.47       | 0.60     | 9.90        | <0.01     | 39.65     | 44.55      | 21.58    | 49.50     |
| 170           | 110.76             | 26.43    | 0.02       | 2.16    | 7.52        | 0.18      | 3.76       | 0.60     | 9.95        | <0.01     | 46.07     | 50.28      | 21.64    | 54.74     |
| 180           | 136.60             | 24.57    | 0.02       | 2.04    | 7.63        | 0.16      | 3.63       | 0.56     | 9.23        | <0.01     | 47.29     | 50.33      | 21.65    | 54.79     |

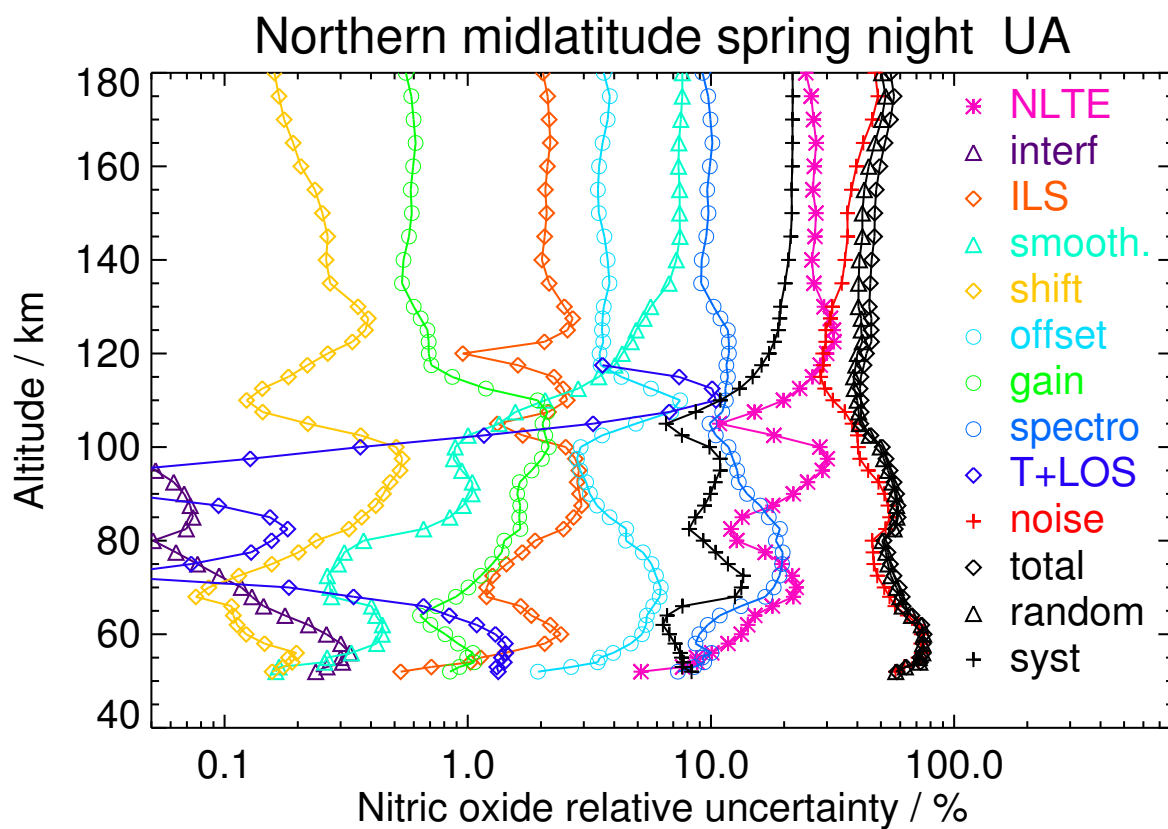

**Figure S114.** V8R\_NOwT\_662 Northern midlatitude spring night

**Table S116.** Nitric oxide error budget for Northern midlatitude summer day. All uncertainties are  $1\sigma$ .

| altitude (km) | mean target (ppmv) | NLTE (%) | interf (%) | ILS (%) | smooth. (%) | shift (%) | offset (%) | gain (%) | spectro (%) | T+LOS (%) | noise (%) | random (%) | syst (%) | total (%) |
|---------------|--------------------|----------|------------|---------|-------------|-----------|------------|----------|-------------|-----------|-----------|------------|----------|-----------|
| 50            | 0.01               | 1.20     | 0.07       | 0.75    | 0.02        | 0.07      | 0.31       | 1.23     | 8.48        | 0.63      | 21.66     | 21.80      | 8.37     | 23.35     |
| 60            | 0.01               | 5.93     | 0.09       | 1.41    | 0.21        | 0.05      | 2.07       | 1.01     | 10.60       | 0.60      | 52.62     | 53.46      | 8.13     | 54.07     |
| 70            | 0.01               | 4.10     | 0.05       | 1.66    | 0.22        | 0.05      | 1.67       | 0.78     | 9.73        | 0.04      | 52.31     | 52.34      | 10.71    | 53.42     |
| 80            | 0.03               | 6.23     | 0.03       | 1.22    | 0.31        | 0.11      | 1.46       | 0.81     | 10.52       | 0.23      | 41.84     | 42.27      | 10.85    | 43.64     |
| 90            | 0.80               | 20.11    | 0.02       | 1.38    | 0.48        | 0.19      | 2.40       | 1.75     | 15.60       | 0.20      | 39.34     | 45.19      | 12.82    | 46.98     |
| 100           | 5.33               | 9.76     | 0.02       | 1.12    | 0.63        | 0.13      | 4.11       | 1.64     | 11.58       | 0.47      | 39.90     | 41.66      | 10.33    | 42.93     |
| 110           | 19.13              | 13.36    | 0.01       | 3.17    | 2.03        | 0.08      | 7.14       | 1.68     | 9.75        | 14.47     | 27.41     | 34.35      | 11.07    | 36.08     |
| 120           | 49.07              | 23.72    | 0.02       | 1.09    | 4.47        | 0.13      | 2.90       | 0.50     | 8.62        | <0.01     | 26.33     | 31.54      | 19.11    | 36.88     |
| 130           | 123.68             | 28.38    | 0.02       | 1.79    | 5.43        | 0.26      | 3.26       | 0.48     | 8.22        | <0.01     | 31.05     | 35.52      | 24.89    | 43.37     |
| 140           | 245.77             | 30.76    | 0.03       | 2.08    | 5.99        | 0.33      | 2.92       | 0.50     | 8.22        | <0.01     | 28.83     | 33.24      | 28.09    | 43.52     |
| 150           | 293.12             | 27.46    | 0.04       | 1.77    | 5.76        | 0.23      | 2.06       | 0.48     | 7.81        | <0.01     | 23.21     | 26.31      | 26.50    | 37.34     |
| 160           | 349.14             | 28.07    | 0.04       | 1.76    | 4.49        | 0.17      | 1.43       | 0.51     | 8.34        | <0.01     | 20.61     | 25.21      | 25.93    | 36.16     |
| 170           | 361.42             | 26.58    | 0.04       | 1.66    | 3.75        | 0.11      | 1.43       | 0.49     | 8.11        | <0.01     | 20.01     | 23.22      | 25.54    | 34.52     |
| 180           | 357.99             | 26.00    | 0.04       | 1.61    | 4.30        | 0.11      | 1.77       | 0.48     | 7.98        | <0.01     | 27.16     | 29.39      | 25.26    | 38.75     |

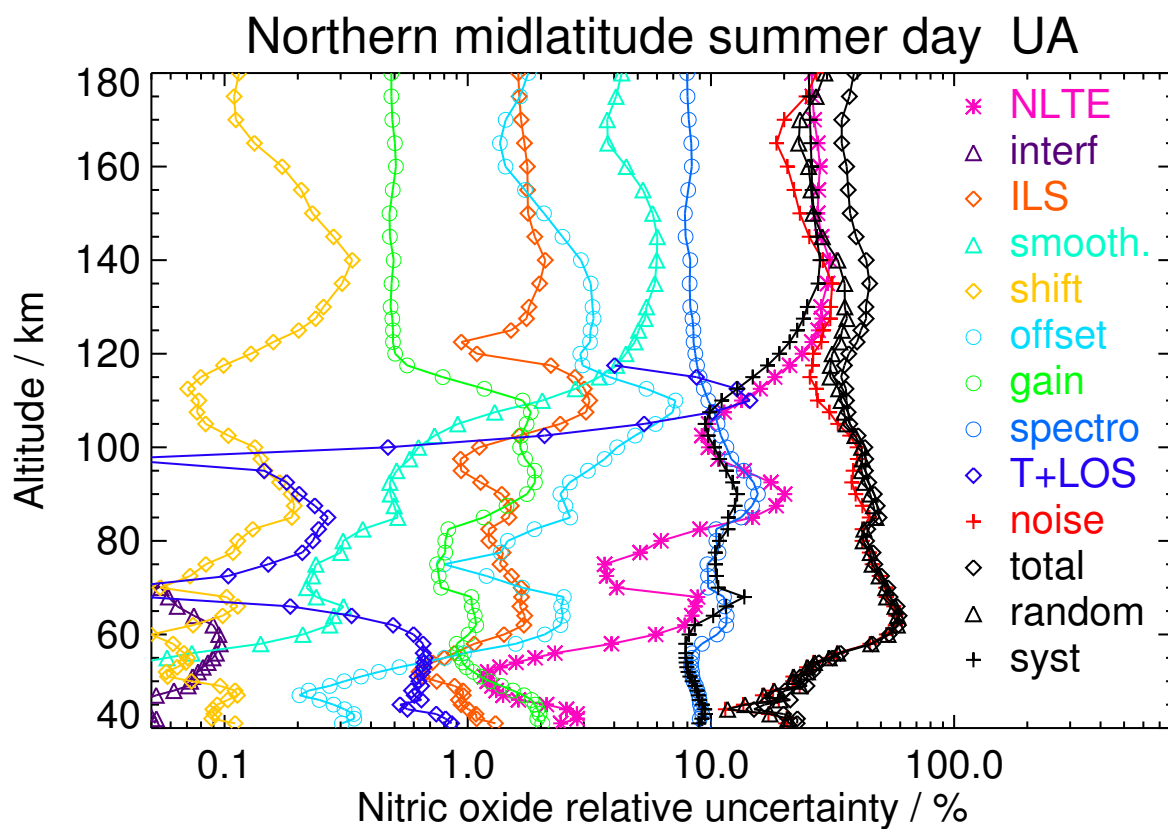

**Figure S115.** V8R\_NOwT\_662 Northern midlatitude summer day



**Table S117.** Nitric oxide error budget for Northern midlatitude summer night. All uncertainties are  $1\sigma$ .

| altitude (km) | mean target (ppmv) | NLTE (%) | interf (%) | ILS (%) | smooth. (%) | shift (%) | offset (%) | gain (%) | spectro (%) | T+LOS (%) | noise (%) | random (%) | syst (%) | total (%) |
|---------------|--------------------|----------|------------|---------|-------------|-----------|------------|----------|-------------|-----------|-----------|------------|----------|-----------|
| 60            | 0.00               | 5.24     | 0.40       | 1.05    | 0.57        | 0.14      | 4.50       | 0.80     | 7.93        | 1.41      | 99.83     | >100       | 6.60     | >100      |
| 80            | 0.02               | 5.48     | 0.05       | 0.13    | 0.35        | 0.17      | 1.55       | 0.76     | 7.32        | 0.08      | 50.07     | 50.10      | 9.18     | 50.93     |
| 90            | 0.33               | 8.37     | 0.11       | 0.70    | 1.10        | 0.18      | 3.56       | 0.85     | 7.97        | 0.29      | 60.47     | 61.11      | 8.43     | 61.69     |
| 100           | 4.48               | 8.72     | 0.06       | 1.59    | 1.16        | 0.18      | 4.94       | 1.56     | 9.06        | 1.78      | 48.87     | 50.24      | 7.52     | 50.80     |
| 110           | 13.65              | 8.02     | 0.04       | 2.80    | 3.08        | 0.12      | 7.45       | 1.72     | 9.17        | 17.47     | 40.46     | 45.63      | 9.20     | 46.55     |
| 120           | 31.71              | 16.27    | 0.03       | 1.65    | 5.65        | 0.05      | 3.92       | 0.46     | 7.96        | <0.01     | 30.59     | 32.87      | 15.28    | 36.25     |
| 130           | 45.36              | 22.73    | 0.02       | 0.75    | 6.93        | 0.09      | 4.59       | 0.50     | 8.57        | <0.01     | 35.40     | 39.09      | 19.62    | 43.74     |
| 140           | 60.05              | 28.71    | 0.02       | 1.62    | 8.40        | 0.14      | 4.67       | 0.57     | 9.59        | <0.01     | 43.12     | 48.21      | 23.37    | 53.58     |
| 150           | 74.42              | 34.61    | 0.02       | 2.07    | 8.78        | 0.13      | 4.54       | 0.65     | 10.90       | <0.01     | 51.89     | 58.77      | 25.66    | 64.13     |
| 160           | 73.82              | 35.69    | 0.02       | 2.18    | 8.79        | 0.11      | 5.41       | 0.67     | 11.30       | <0.01     | 65.30     | 71.25      | 26.47    | 76.01     |
| 170           | 79.22              | 31.97    | 0.02       | 1.98    | 8.82        | 0.10      | 6.06       | 0.60     | 10.21       | <0.01     | 74.41     | 78.07      | 26.21    | 82.35     |
| 180           | 109.26             | 30.00    | 0.02       | 1.86    | 8.46        | 0.09      | 5.51       | 0.56     | 9.52        | <0.01     | 69.30     | 71.95      | 26.86    | 76.80     |

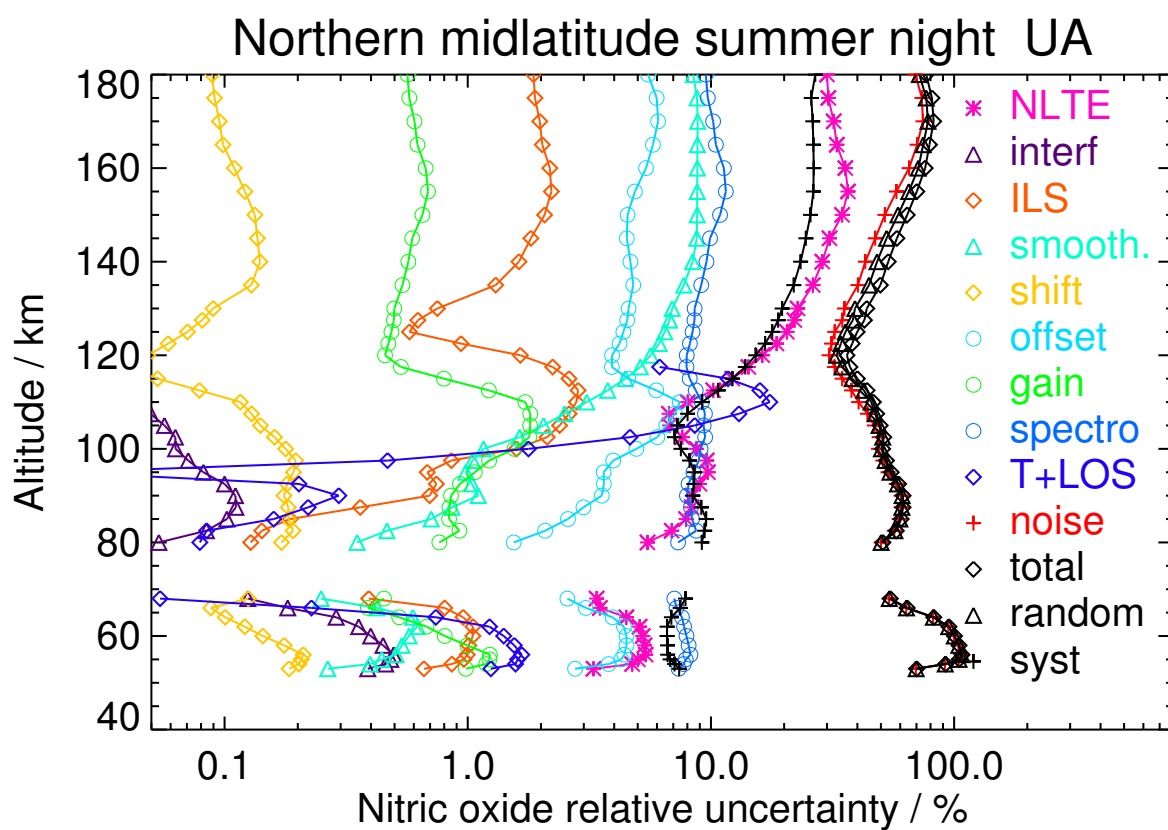

**Figure S116.** V8R\_NOwT\_662 Northern midlatitude summer night

**Table S118.** Nitric oxide error budget for Northern midlatitude autumn day. All uncertainties are  $1\sigma$ .

| altitude (km) | mean target (ppmv) | NLTE (%) | interf (%) | ILS (%) | smooth. (%) | shift (%) | offset (%) | gain (%) | spectro (%) | T+LOS (%) | noise (%) | random (%) | syst (%) | total (%) |
|---------------|--------------------|----------|------------|---------|-------------|-----------|------------|----------|-------------|-----------|-----------|------------|----------|-----------|
| 50            | 0.01               | 1.80     | 0.07       | 1.00    | 0.07        | 0.08      | 0.51       | 1.39     | 8.82        | 0.69      | 26.13     | 26.38      | 8.49     | 27.71     |
| 60            | 0.00               | 7.55     | 0.09       | 1.55    | 0.43        | 0.04      | 2.34       | 1.01     | 9.71        | 0.54      | 57.96     | 58.81      | 7.87     | 59.33     |
| 70            | 0.01               | 12.36    | 0.06       | 2.00    | 0.43        | 0.06      | 2.64       | 0.85     | 11.73       | 0.03      | 59.96     | 61.59      | 10.20    | 62.43     |
| 80            | 0.04               | 12.11    | 0.03       | 1.93    | 1.05        | 0.09      | 2.13       | 0.91     | 13.21       | 0.15      | 63.21     | 64.98      | 10.20    | 65.78     |
| 90            | 0.37               | 16.66    | 0.03       | 2.16    | 1.44        | 0.12      | 3.23       | 1.35     | 17.23       | 0.12      | 60.23     | 63.67      | 12.90    | 64.97     |
| 100           | 3.90               | 22.19    | 0.01       | 2.12    | 0.78        | 0.10      | 5.41       | 2.55     | 24.90       | 0.11      | 36.52     | 47.64      | 14.76    | 49.88     |
| 110           | 12.71              | 19.65    | 0.02       | 0.95    | 2.56        | 0.18      | 8.12       | 2.06     | 16.06       | 4.69      | 36.51     | 44.39      | 10.32    | 45.57     |
| 120           | 22.78              | 22.55    | 0.02       | 1.16    | 5.06        | 0.23      | 3.19       | 0.57     | 9.74        | <0.01     | 33.16     | 39.25      | 14.15    | 41.72     |
| 130           | 42.39              | 20.65    | 0.01       | 1.46    | 6.59        | 0.15      | 3.78       | 0.50     | 8.45        | <0.01     | 34.42     | 37.70      | 17.91    | 41.74     |
| 140           | 99.73              | 30.07    | 0.01       | 1.95    | 7.49        | 0.24      | 4.53       | 0.58     | 9.71        | <0.01     | 35.00     | 42.04      | 23.17    | 48.00     |
| 150           | 189.09             | 30.22    | 0.02       | 2.09    | 7.46        | 0.28      | 3.81       | 0.60     | 9.96        | <0.01     | 29.49     | 37.65      | 23.23    | 44.24     |
| 160           | 255.90             | 27.71    | 0.02       | 2.04    | 6.96        | 0.25      | 2.79       | 0.60     | 9.91        | <0.01     | 25.39     | 33.07      | 21.86    | 39.64     |
| 170           | 267.42             | 24.68    | 0.02       | 1.88    | 7.03        | 0.21      | 2.51       | 0.56     | 9.24        | <0.01     | 28.67     | 33.74      | 20.92    | 39.70     |
| 180           | 270.04             | 23.80    | 0.02       | 1.84    | 7.69        | 0.21      | 2.65       | 0.55     | 9.06        | <0.01     | 34.58     | 38.65      | 20.49    | 43.75     |

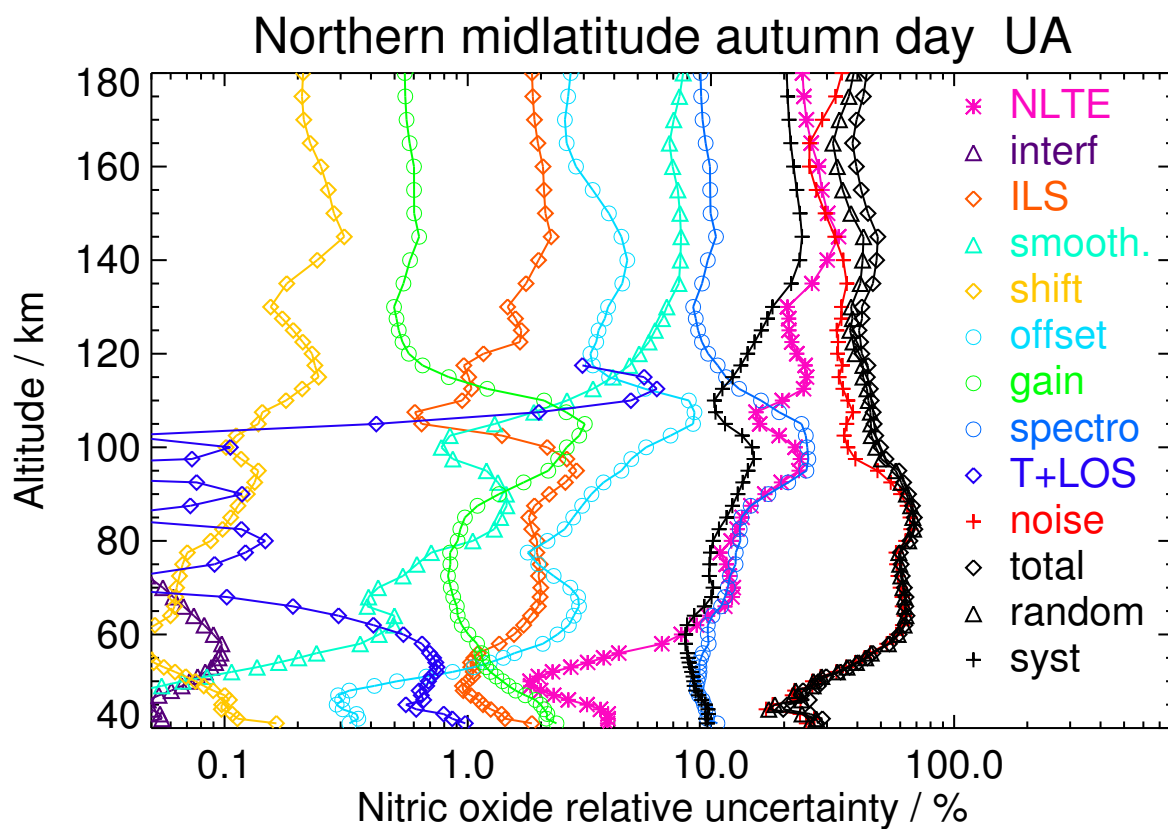

**Figure S117.** V8R\_NOwT\_662 Northern midlatitude autumn day

**Table S119.** Nitric oxide error budget for Northern midlatitude autumn night. All uncertainties are  $1\sigma$ .

| altitude (km) | mean target (ppmv) | NLTE (%) | interf (%) | ILS (%) | smooth. (%) | shift (%) | offset (%) | gain (%) | spectro (%) | T+LOS (%) | noise (%) | random (%) | syst (%) | total (%) |
|---------------|--------------------|----------|------------|---------|-------------|-----------|------------|----------|-------------|-----------|-----------|------------|----------|-----------|
| 50            | 0.00               | 2.17     | 0.20       | 0.47    | 0.14        | 0.12      | 1.69       | 0.20     | 7.10        | 1.11      | 66.40     | 66.43      | 7.44     | 66.85     |
| 60            | 0.01               | 12.92    | 0.19       | 1.23    | 0.47        | 0.09      | 3.79       | 0.68     | 9.49        | 1.10      | 69.70     | 71.29      | 7.05     | 71.64     |
| 70            | 0.04               | 21.03    | 0.09       | 1.42    | 0.55        | 0.08      | 3.35       | 0.66     | 8.00        | 0.14      | 56.12     | 60.08      | 7.74     | 60.58     |
| 80            | 0.11               | 21.89    | 0.08       | 2.27    | 0.90        | 0.18      | 3.45       | 0.88     | 9.84        | 0.09      | 60.88     | 65.15      | 7.54     | 65.59     |
| 90            | 1.31               | 18.96    | 0.05       | 1.74    | 1.09        | 0.27      | 3.45       | 1.28     | 8.72        | 0.47      | 53.77     | 57.19      | 8.64     | 57.84     |
| 100           | 8.64               | 18.30    | 0.03       | 1.54    | 1.12        | 0.30      | 6.22       | 2.11     | 13.81       | 0.40      | 41.56     | 47.20      | 8.48     | 47.96     |
| 110           | 24.11              | 24.90    | 0.03       | 1.84    | 2.98        | 0.18      | 12.82      | 2.35     | 13.34       | 10.09     | 37.98     | 48.83      | 11.83    | 50.24     |
| 120           | 33.55              | 41.96    | 0.03       | 0.97    | 5.03        | 0.47      | 3.88       | 0.86     | 13.56       | <0.01     | 35.71     | 54.43      | 17.30    | 57.11     |
| 130           | 37.27              | 39.19    | 0.03       | 2.60    | 5.92        | 0.43      | 3.92       | 0.71     | 11.85       | <0.01     | 35.44     | 50.95      | 19.85    | 54.68     |
| 140           | 46.43              | 33.04    | 0.04       | 2.22    | 6.78        | 0.26      | 3.74       | 0.62     | 10.49       | <0.01     | 36.28     | 46.29      | 20.99    | 50.83     |
| 150           | 57.82              | 32.45    | 0.02       | 2.27    | 7.15        | 0.23      | 3.66       | 0.64     | 10.72       | <0.01     | 37.51     | 47.01      | 20.87    | 51.43     |
| 160           | 73.09              | 29.84    | 0.02       | 2.15    | 7.05        | 0.16      | 3.78       | 0.62     | 10.51       | <0.01     | 41.12     | 48.26      | 20.79    | 52.55     |
| 170           | 80.13              | 31.31    | 0.02       | 2.31    | 7.20        | 0.14      | 4.10       | 0.66     | 11.24       | <0.01     | 47.49     | 54.67      | 21.15    | 58.62     |
| 180           | 99.52              | 28.66    | 0.02       | 2.12    | 7.47        | 0.13      | 4.05       | 0.61     | 10.46       | <0.01     | 50.00     | 55.25      | 21.33    | 59.22     |

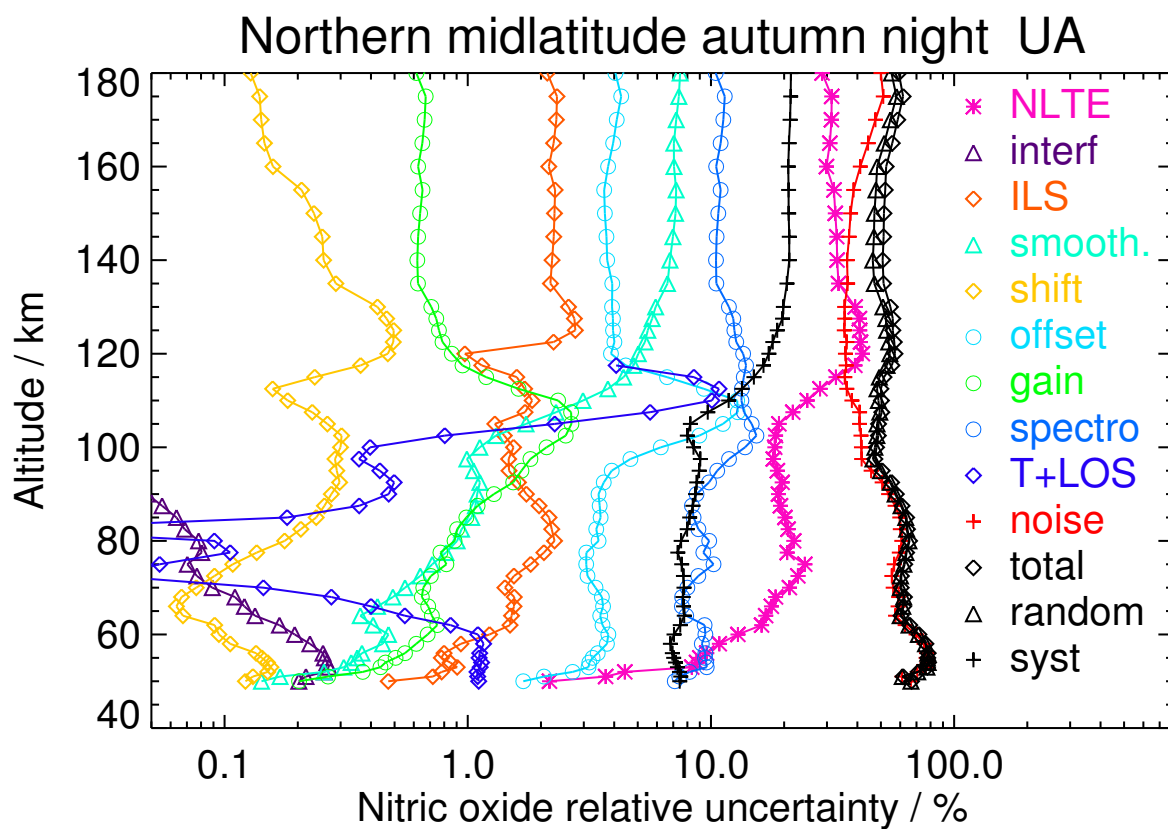

**Figure S118.** V8R\_NOwT\_662 Northern midlatitude autumn night

**Table S120.** Nitric oxide error budget for Tropics day. All uncertainties are  $1\sigma$ .

| altitude (km) | mean target (ppmv) | NLTE (%) | interf (%) | ILS (%) | smooth. (%) | shift (%) | offset (%) | gain (%) | spectro (%) | T+LOS (%) | noise (%) | random (%) | syst (%) | total (%) |
|---------------|--------------------|----------|------------|---------|-------------|-----------|------------|----------|-------------|-----------|-----------|------------|----------|-----------|
| 40            | 0.01               | 3.07     | 0.04       | 1.04    | 0.01        | 0.07      | 0.36       | 1.86     | 8.41        | 0.86      | 15.43     | 15.70      | 8.78     | 17.99     |
| 50            | 0.01               | 1.19     | 0.07       | 1.18    | 0.03        | 0.09      | 0.27       | 1.35     | 9.28        | 0.68      | 21.09     | 21.30      | 9.07     | 23.16     |
| 60            | 0.00               | 4.22     | 0.12       | 1.56    | 0.43        | 0.05      | 2.07       | 0.89     | 10.15       | 0.53      | 63.32     | 63.66      | 9.31     | 64.33     |
| 70            | 0.00               | 5.45     | 0.05       | 1.12    | 0.66        | 0.10      | 1.80       | 0.72     | 7.51        | <0.01     | 58.91     | 58.94      | 9.37     | 59.68     |
| 80            | 0.01               | 8.36     | 0.04       | 0.91    | 0.84        | 0.14      | 1.30       | 0.75     | 8.78        | 0.15      | 62.15     | 62.28      | 11.61    | 63.35     |
| 90            | 0.19               | 11.39    | 0.03       | 0.77    | 1.09        | 0.14      | 2.40       | 0.94     | 10.89       | 0.12      | 59.27     | 59.85      | 13.68    | 61.40     |
| 100           | 2.16               | 14.39    | 0.03       | 0.71    | 1.46        | 0.16      | 2.87       | 0.87     | 10.66       | 0.05      | 55.49     | 56.46      | 14.96    | 58.41     |
| 110           | 10.49              | 12.86    | 0.02       | 0.90    | 2.55        | 0.12      | 3.42       | 0.89     | 10.52       | 3.60      | 42.08     | 43.53      | 13.60    | 45.60     |
| 120           | 31.81              | 19.26    | 0.02       | 0.77    | 4.66        | 0.12      | 2.75       | 0.62     | 10.49       | <0.01     | 28.18     | 32.45      | 15.87    | 36.13     |
| 130           | 72.28              | 27.74    | 0.01       | 1.87    | 5.35        | 0.23      | 3.31       | 0.56     | 9.61        | <0.01     | 30.58     | 37.29      | 21.21    | 42.90     |
| 140           | 132.96             | 28.31    | 0.02       | 1.84    | 6.33        | 0.25      | 3.66       | 0.51     | 8.59        | <0.01     | 31.00     | 35.93      | 24.53    | 43.51     |
| 150           | 166.01             | 26.44    | 0.02       | 1.80    | 7.07        | 0.24      | 2.98       | 0.52     | 8.53        | <0.01     | 26.47     | 31.39      | 23.44    | 39.18     |
| 160           | 196.14             | 23.91    | 0.02       | 1.75    | 6.94        | 0.20      | 2.07       | 0.52     | 8.49        | <0.01     | 23.12     | 27.50      | 21.85    | 35.13     |
| 170           | 203.81             | 23.59    | 0.02       | 1.82    | 6.92        | 0.17      | 1.93       | 0.54     | 8.81        | <0.01     | 24.77     | 29.13      | 21.32    | 36.10     |
| 180           | 205.85             | 23.72    | 0.02       | 1.86    | 7.74        | 0.19      | 2.14       | 0.55     | 9.00        | <0.01     | 31.11     | 35.12      | 21.14    | 40.99     |

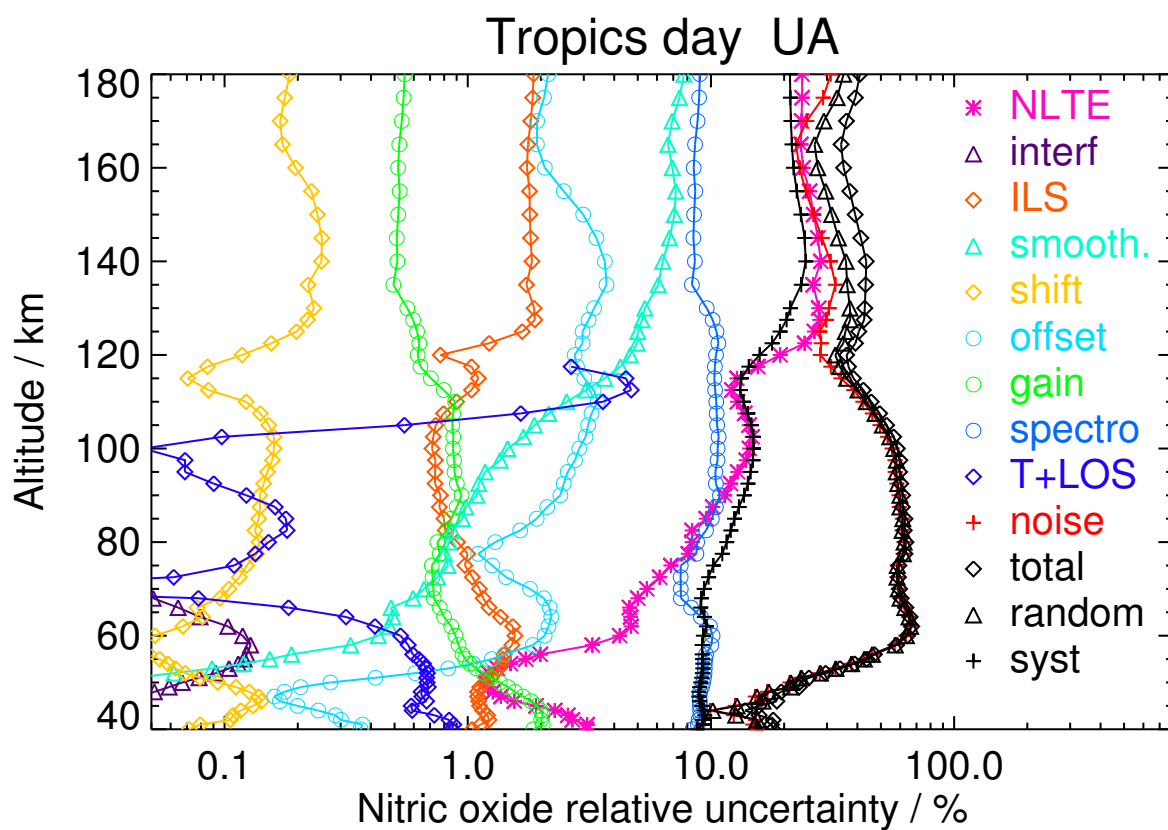

**Figure S119.** V8R\_NOWT\_662 Tropics day

**Table S121.** Nitric oxide error budget for Tropics night. All uncertainties are  $1\sigma$ .

| altitude (km) | mean target (ppmv) | NLTE (%) | interf (%) | ILS (%) | smooth. (%) | shift (%) | offset (%) | gain (%) | spectro (%) | T+LOS (%) | noise (%) | random (%) | syst (%) | total (%) |
|---------------|--------------------|----------|------------|---------|-------------|-----------|------------|----------|-------------|-----------|-----------|------------|----------|-----------|
| 60            | 0.00               | 2.82     | 0.43       | 0.89    | 0.52        | 0.21      | 3.79       | 0.67     | 11.34       | 1.03      | 99.49     | 99.93      | 8.09     | >100      |
| 70            | 0.02               | 3.91     | 0.08       | 0.63    | 0.68        | 0.21      | 1.90       | 0.81     | 7.48        | 0.03      | 56.54     | 56.58      | 8.50     | 57.21     |
| 90            | 0.18               | 6.40     | 0.13       | 0.57    | 1.57        | 0.15      | 4.26       | 0.65     | 8.52        | 0.32      | 74.24     | 74.64      | 8.66     | 75.15     |
| 100           | 1.45               | 6.70     | 0.10       | 0.99    | 2.21        | 0.12      | 5.06       | 0.76     | 8.36        | 0.35      | 67.92     | 68.44      | 8.67     | 68.99     |
| 110           | 5.32               | 7.53     | 0.08       | 1.43    | 4.00        | 0.09      | 5.65       | 0.84     | 8.04        | 8.37      | 56.33     | 57.68      | 9.36     | 58.44     |
| 120           | 10.40              | 11.39    | 0.05       | 1.03    | 5.90        | 0.04      | 3.94       | 0.44     | 8.18        | <0.01     | 40.77     | 42.01      | 12.05    | 43.71     |
| 130           | 16.02              | 15.68    | 0.04       | 0.76    | 7.18        | 0.05      | 3.92       | 0.47     | 8.63        | <0.01     | 35.00     | 37.32      | 14.83    | 40.16     |
| 140           | 23.27              | 21.17    | 0.03       | 1.43    | 8.60        | 0.07      | 4.77       | 0.55     | 9.78        | <0.01     | 44.54     | 47.84      | 18.38    | 51.25     |
| 150           | 27.72              | 29.28    | 0.02       | 2.03    | 9.05        | 0.08      | 5.83       | 0.73     | 12.62       | <0.01     | 59.74     | 65.39      | 20.75    | 68.60     |
| 160           | 31.08              | 35.35    | 0.02       | 2.42    | 9.33        | 0.09      | 7.11       | 0.88     | 15.32       | <0.01     | 75.09     | 82.38      | 21.91    | 85.25     |
| 170           | 46.62              | 40.72    | 0.02       | 2.77    | 9.57        | 0.10      | 7.60       | 1.02     | 17.59       | <0.01     | 81.33     | 90.56      | 23.19    | 93.49     |
| 180           | 91.57              | 39.24    | 0.02       | 2.66    | 9.77        | 0.09      | 7.22       | 0.96     | 16.88       | <0.01     | 76.30     | 84.78      | 24.82    | 88.33     |

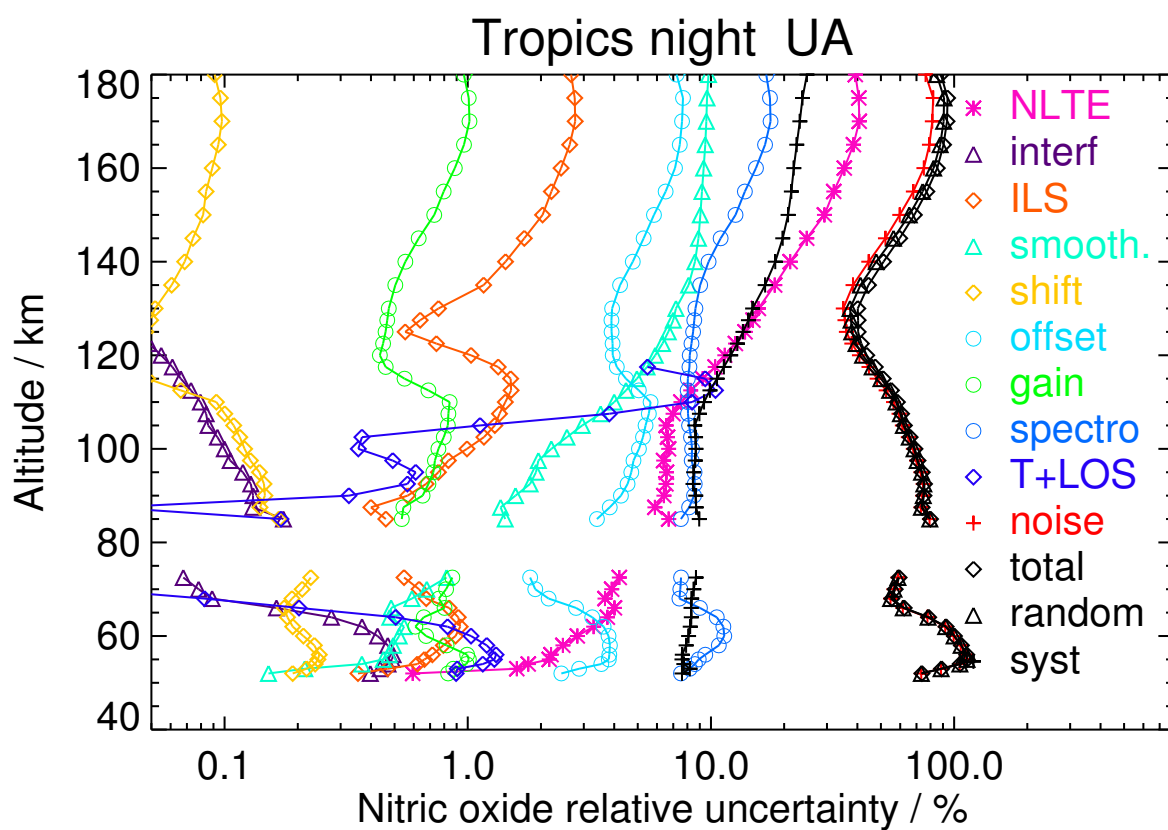

**Figure S120.** V8R\_NOwT\_662 Tropics night

**Table S122.** Nitric oxide error budget for Southern midlatitude winter day. All uncertainties are  $1\sigma$ .

| altitude (km) | mean target (ppmv) | NLTE (%) | interf (%) | ILS (%) | smooth. (%) | shift (%) | offset (%) | gain (%) | spectro (%) | T+LOS (%) | noise (%) | random (%) | syst (%) | total (%) |
|---------------|--------------------|----------|------------|---------|-------------|-----------|------------|----------|-------------|-----------|-----------|------------|----------|-----------|
| 50            | 0.01               | 1.90     | 0.09       | 0.82    | 0.07        | 0.08      | 0.66       | 1.31     | 8.38        | 0.60      | 31.51     | 31.78      | 7.76     | 32.71     |
| 60            | 0.00               | 4.44     | 0.11       | 1.27    | 0.28        | 0.07      | 2.52       | 0.87     | 9.95        | 0.55      | 57.70     | 58.37      | 7.08     | 58.80     |
| 70            | 0.02               | 5.25     | 0.04       | 2.61    | 0.29        | 0.11      | 2.08       | 0.90     | 10.74       | <0.01     | 49.87     | 50.83      | 7.64     | 51.40     |
| 80            | 0.10               | 9.35     | 0.02       | 1.52    | 0.46        | 0.07      | 1.40       | 0.94     | 9.88        | 0.16      | 46.15     | 47.23      | 9.44     | 48.17     |
| 90            | 0.94               | 16.40    | 0.01       | 1.24    | 0.58        | 0.11      | 2.62       | 1.32     | 10.89       | 0.02      | 37.62     | 40.67      | 12.61    | 42.58     |
| 100           | 4.73               | 17.84    | 0.01       | 1.60    | 0.85        | 0.14      | 2.46       | 0.90     | 10.10       | 0.10      | 35.99     | 39.49      | 12.89    | 41.54     |
| 110           | 21.67              | 10.21    | <0.01      | 1.46    | 2.01        | 0.10      | 6.32       | 1.14     | 10.78       | 5.60      | 33.33     | 36.61      | 8.36     | 37.56     |
| 120           | 48.48              | 22.13    | <0.01      | 0.99    | 4.76        | 0.17      | 3.33       | 0.68     | 11.09       | <0.01     | 31.00     | 37.62      | 13.90    | 40.11     |
| 130           | 79.95              | 27.14    | <0.01      | 2.19    | 6.07        | 0.30      | 4.21       | 0.63     | 10.35       | <0.01     | 35.42     | 42.66      | 18.40    | 46.46     |
| 140           | 149.28             | 28.09    | 0.02       | 2.10    | 7.19        | 0.31      | 4.51       | 0.59     | 9.82        | <0.01     | 36.95     | 42.90      | 22.06    | 48.24     |
| 150           | 193.79             | 26.01    | 0.02       | 2.00    | 7.17        | 0.25      | 3.42       | 0.59     | 9.75        | <0.01     | 31.67     | 36.96      | 21.81    | 42.92     |
| 160           | 224.98             | 24.10    | 0.02       | 1.86    | 6.67        | 0.19      | 2.72       | 0.56     | 9.27        | <0.01     | 29.36     | 33.70      | 21.18    | 39.80     |
| 170           | 266.13             | 23.58    | 0.02       | 1.83    | 6.79        | 0.16      | 2.87       | 0.56     | 9.23        | <0.01     | 34.33     | 38.00      | 20.82    | 43.33     |
| 180           | 290.90             | 23.31    | 0.02       | 1.81    | 7.18        | 0.15      | 3.08       | 0.55     | 9.20        | <0.01     | 40.09     | 43.30      | 20.61    | 47.96     |

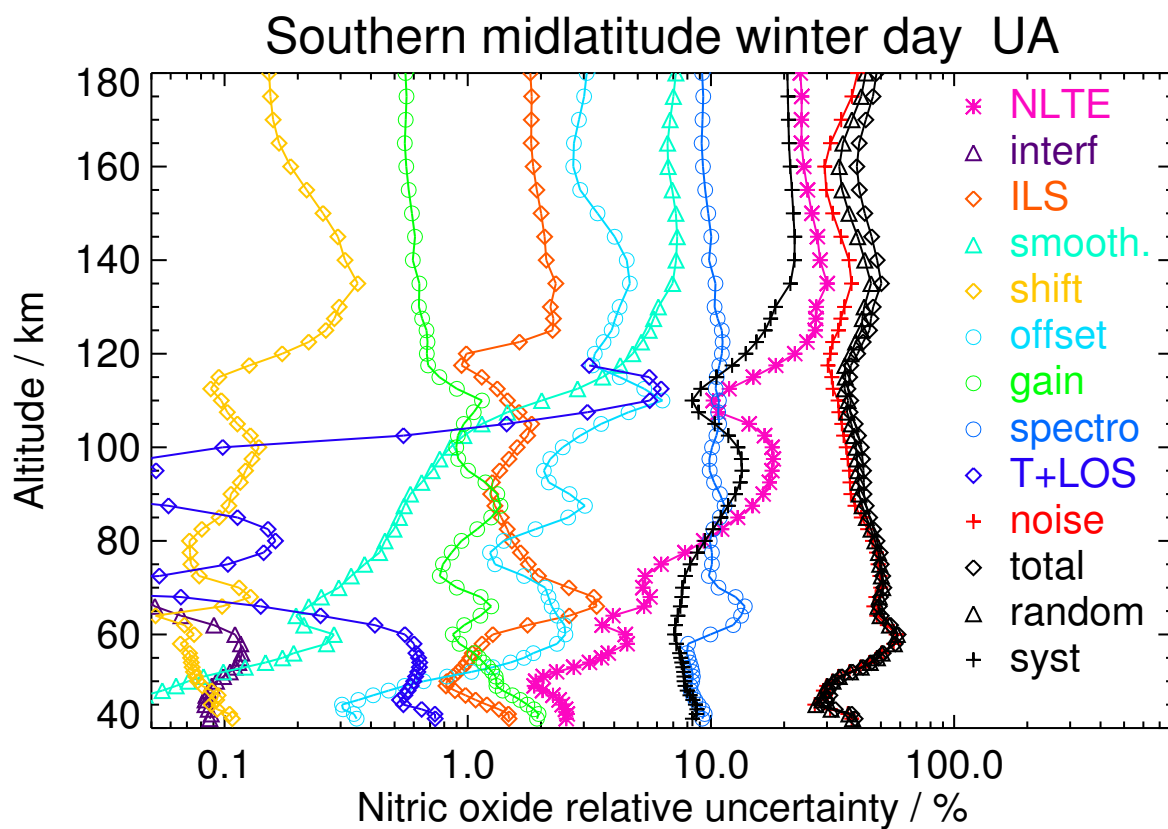

**Figure S121.** V8R\_NOwT\_662 Southern midlatitude winter day

**Table S123.** Nitric oxide error budget for Southern midlatitude winter night. All uncertainties are  $1\sigma$ .

| altitude (km) | mean target (ppmv) | NLTE (%) | interf (%) | ILS (%) | smooth. (%) | shift (%) | offset (%) | gain (%) | spectro (%) | T+LOS (%) | noise (%) | random (%) | syst (%) | total (%) |
|---------------|--------------------|----------|------------|---------|-------------|-----------|------------|----------|-------------|-----------|-----------|------------|----------|-----------|
| 60            | 0.00               | 4.64     | 0.30       | 1.13    | 0.38        | 0.12      | 4.70       | 0.50     | 8.13        | 1.10      | 98.79     | 99.12      | 6.80     | 99.36     |
| 70            | 0.02               | 4.79     | 0.17       | 1.69    | 0.35        | 0.09      | 3.55       | 1.06     | 8.58        | 0.11      | 69.89     | 70.29      | 7.53     | 70.69     |
| 80            | 0.09               | 9.42     | 0.09       | 1.97    | 0.57        | 0.25      | 1.91       | 2.32     | 12.47       | 0.18      | 58.18     | 59.66      | 9.09     | 60.35     |
| 90            | 0.98               | 12.78    | 0.04       | 1.41    | 0.77        | 0.33      | 3.29       | 2.86     | 14.39       | 0.11      | 50.67     | 53.53      | 9.67     | 54.40     |
| 100           | 5.24               | 14.08    | 0.07       | 1.43    | 1.31        | 0.37      | 7.28       | 2.03     | 15.44       | 1.73      | 50.78     | 54.61      | 9.86     | 55.49     |
| 110           | 21.50              | 21.43    | 0.05       | 2.08    | 2.64        | 0.35      | 12.09      | 2.27     | 14.50       | 13.70     | 39.21     | 49.29      | 11.29    | 50.57     |
| 120           | 46.78              | 33.10    | 0.02       | 0.91    | 4.38        | 0.18      | 3.70       | 0.78     | 12.95       | <0.01     | 29.54     | 43.08      | 17.72    | 46.58     |
| 130           | 57.41              | 53.86    | 0.01       | 3.30    | 5.01        | 0.41      | 3.68       | 0.97     | 16.27       | <0.01     | 31.34     | 60.97      | 21.94    | 64.80     |
| 140           | 64.53              | 73.85    | 0.01       | 5.29    | 7.24        | 1.02      | 3.90       | 1.28     | 21.16       | <0.01     | 36.52     | 82.46      | 23.12    | 85.63     |
| 150           | 53.14              | 50.98    | 0.02       | 4.12    | 8.25        | 0.81      | 4.15       | 1.04     | 16.97       | <0.01     | 41.84     | 65.76      | 20.39    | 68.85     |
| 160           | 60.54              | 47.68    | 0.02       | 3.92    | 7.56        | 0.63      | 4.32       | 1.04     | 17.15       | <0.01     | 46.07     | 66.28      | 19.74    | 69.16     |
| 170           | 68.49              | 39.88    | 0.02       | 3.32    | 7.54        | 0.46      | 4.64       | 0.89     | 14.77       | <0.01     | 52.50     | 65.44      | 19.32    | 68.23     |
| 180           | 105.02             | 32.14    | 0.01       | 2.69    | 7.68        | 0.37      | 4.31       | 0.71     | 12.04       | <0.01     | 52.04     | 60.02      | 19.22    | 63.02     |

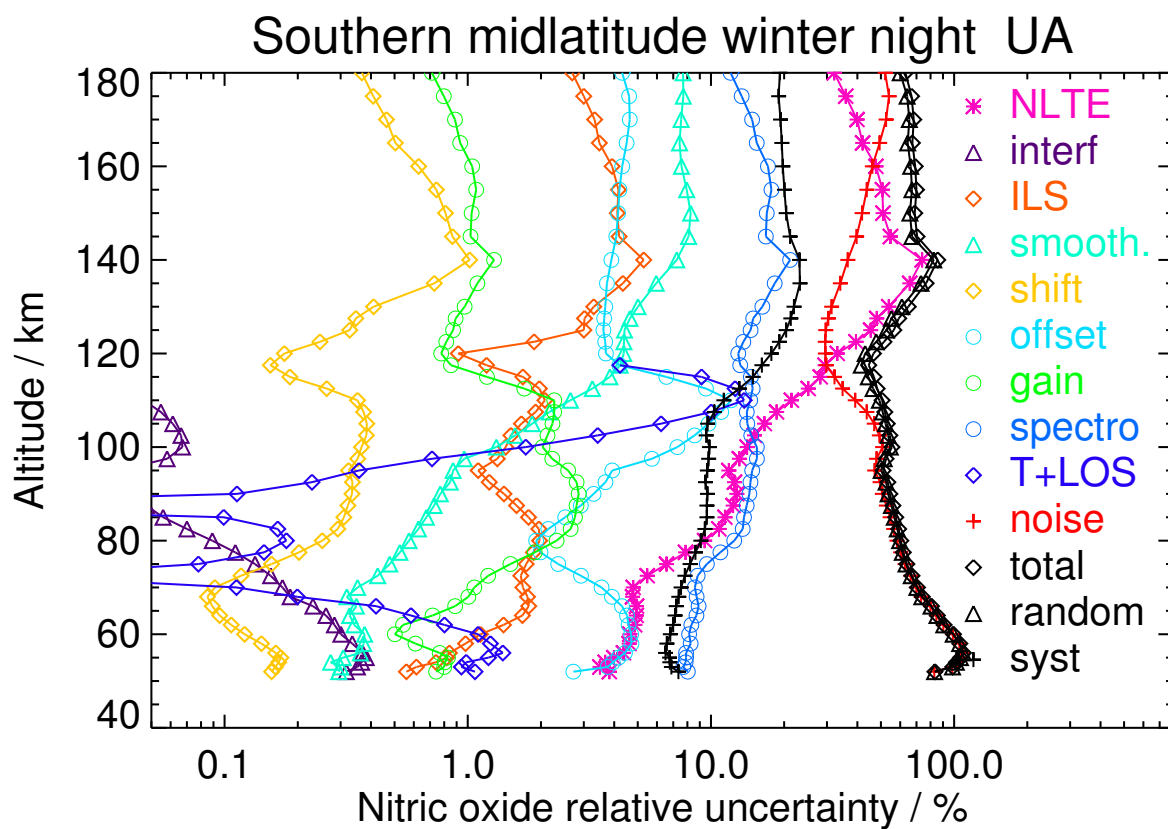

**Figure S122.** V8R\_NOwT\_662 Southern midlatitude winter night

**Table S124.** Nitric oxide error budget for Southern midlatitude spring day. All uncertainties are  $1\sigma$ .

| altitude (km) | mean target (ppmv) | NLTE (%) | interf (%) | ILS (%) | smooth. (%) | shift (%) | offset (%) | gain (%) | spectro (%) | T+LOS (%) | noise (%) | random (%) | syst (%) | total (%) |
|---------------|--------------------|----------|------------|---------|-------------|-----------|------------|----------|-------------|-----------|-----------|------------|----------|-----------|
| 50            | 0.01               | 1.76     | 0.08       | 1.10    | 0.05        | 0.08      | 0.43       | 1.30     | 8.70        | 0.67      | 26.18     | 26.40      | 8.41     | 27.70     |
| 60            | 0.00               | 5.70     | 0.11       | 1.95    | 0.40        | 0.06      | 2.33       | 0.95     | 10.37       | 0.77      | 62.06     | 62.63      | 8.92     | 63.26     |
| 70            | 0.01               | 8.53     | 0.04       | 1.58    | 0.42        | 0.09      | 2.94       | 1.11     | 13.17       | <0.01     | 59.48     | 59.56      | 15.79    | 61.62     |
| 80            | 0.05               | 8.84     | 0.03       | 1.57    | 0.58        | 0.16      | 2.33       | 1.07     | 14.29       | 0.20      | 56.50     | 57.50      | 13.34    | 59.03     |
| 90            | 0.42               | 14.99    | 0.03       | 1.58    | 0.82        | 0.26      | 2.98       | 1.09     | 14.09       | <0.01     | 52.51     | 54.54      | 14.82    | 56.52     |
| 100           | 3.17               | 17.52    | 0.02       | 1.14    | 0.92        | 0.28      | 3.48       | 1.13     | 13.12       | <0.01     | 45.07     | 47.79      | 15.58    | 50.26     |
| 110           | 18.49              | 17.23    | 0.02       | 1.30    | 2.16        | 0.18      | 6.79       | 1.32     | 12.37       | 8.24      | 34.68     | 39.72      | 14.03    | 42.13     |
| 120           | 58.58              | 28.09    | 0.02       | 0.69    | 4.15        | 0.22      | 2.64       | 0.57     | 9.69        | <0.01     | 26.92     | 34.40      | 21.19    | 40.40     |
| 130           | 133.45             | 29.96    | 0.03       | 1.71    | 4.84        | 0.26      | 2.70       | 0.52     | 8.92        | <0.01     | 29.26     | 35.29      | 24.93    | 43.21     |
| 140           | 196.91             | 30.03    | 0.02       | 1.87    | 5.91        | 0.29      | 2.60       | 0.50     | 8.42        | <0.01     | 27.21     | 32.03      | 27.08    | 41.94     |
| 150           | 299.23             | 27.41    | 0.03       | 1.91    | 6.19        | 0.24      | 2.10       | 0.52     | 8.61        | <0.01     | 22.23     | 27.44      | 24.77    | 36.97     |
| 160           | 309.72             | 25.08    | 0.03       | 1.87    | 5.82        | 0.17      | 1.61       | 0.52     | 8.65        | <0.01     | 20.01     | 24.80      | 23.00    | 33.83     |
| 170           | 393.14             | 24.08    | 0.02       | 1.86    | 4.44        | 0.12      | 1.40       | 0.52     | 8.66        | <0.01     | 17.21     | 21.85      | 22.34    | 31.25     |
| 180           | 431.84             | 23.60    | 0.03       | 1.86    | 5.15        | 0.14      | 1.53       | 0.52     | 8.56        | <0.01     | 21.83     | 25.47      | 22.15    | 33.75     |

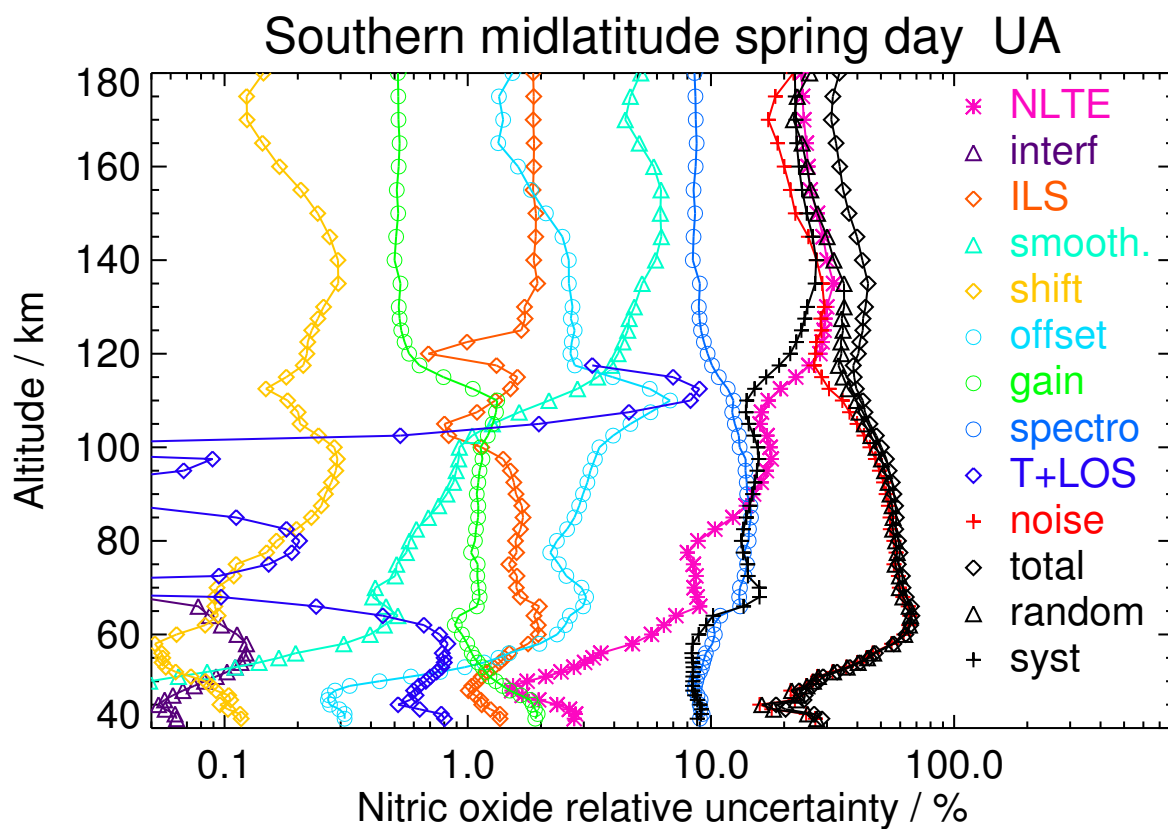

**Figure S123.** V8R\_NOwT\_662 Southern midlatitude spring day



**Table S125.** Nitric oxide error budget for Southern midlatitude spring night. All uncertainties are  $1\sigma$ .

| altitude (km) | mean target (ppmv) | NLTE (%) | interf (%) | ILS (%) | smooth. (%) | shift (%) | offset (%) | gain (%) | spectro (%) | T+LOS (%) | noise (%) | random (%) | syst (%) | total (%) |
|---------------|--------------------|----------|------------|---------|-------------|-----------|------------|----------|-------------|-----------|-----------|------------|----------|-----------|
| 60            | 0.00               | 13.92    | 0.43       | 1.32    | 0.64        | 0.15      | 5.24       | 0.97     | 11.14       | 1.40      | >100      | >100       | 7.38     | >100      |
| 70            | 0.04               | 27.82    | 0.12       | 1.43    | 0.29        | 0.05      | 6.04       | 1.28     | 19.61       | 0.15      | 58.60     | 58.91      | 34.08    | 68.06     |
| 80            | 0.21               | 21.95    | 0.05       | 0.84    | 0.26        | 0.13      | 4.98       | 1.84     | 19.57       | 0.16      | 40.22     | 47.44      | 16.15    | 50.11     |
| 90            | 0.90               | 28.46    | 0.05       | 0.69    | 0.57        | 0.38      | 8.39       | 3.69     | 23.20       | 0.09      | 42.00     | 55.24      | 12.08    | 56.54     |
| 100           | 5.03               | 18.66    | 0.05       | 1.00    | 0.89        | 0.25      | 9.01       | 3.12     | 17.17       | 0.30      | 44.35     | 50.96      | 10.28    | 51.99     |
| 110           | 15.49              | 14.41    | 0.04       | 2.06    | 2.68        | 0.15      | 8.13       | 1.81     | 10.47       | 15.44     | 37.04     | 43.59      | 10.40    | 44.81     |
| 120           | 29.29              | 24.30    | 0.04       | 0.94    | 4.97        | 0.16      | 3.52       | 0.58     | 10.04       | <0.01     | 31.55     | 38.17      | 16.38    | 41.53     |
| 130           | 51.21              | 45.82    | 0.11       | 2.69    | 5.09        | 0.53      | 3.24       | 0.83     | 14.07       | <0.01     | 30.54     | 52.99      | 21.63    | 57.23     |
| 140           | 63.75              | 36.93    | 0.03       | 2.61    | 6.21        | 0.35      | 2.96       | 0.70     | 11.65       | <0.01     | 30.58     | 45.05      | 21.46    | 49.90     |
| 150           | 68.74              | 32.88    | 0.04       | 2.40    | 7.05        | 0.28      | 3.04       | 0.67     | 11.25       | <0.01     | 33.77     | 44.26      | 21.31    | 49.12     |
| 160           | 74.14              | 33.49    | 0.03       | 2.56    | 7.38        | 0.34      | 3.38       | 0.70     | 11.77       | <0.01     | 38.65     | 48.73      | 21.29    | 53.17     |
| 170           | 88.66              | 35.74    | 0.02       | 2.88    | 7.42        | 0.35      | 3.51       | 0.77     | 12.91       | <0.01     | 41.07     | 52.51      | 21.23    | 56.64     |
| 180           | 115.90             | 33.09    | 0.02       | 2.70    | 7.68        | 0.30      | 3.42       | 0.72     | 12.16       | <0.01     | 43.24     | 52.23      | 21.51    | 56.49     |

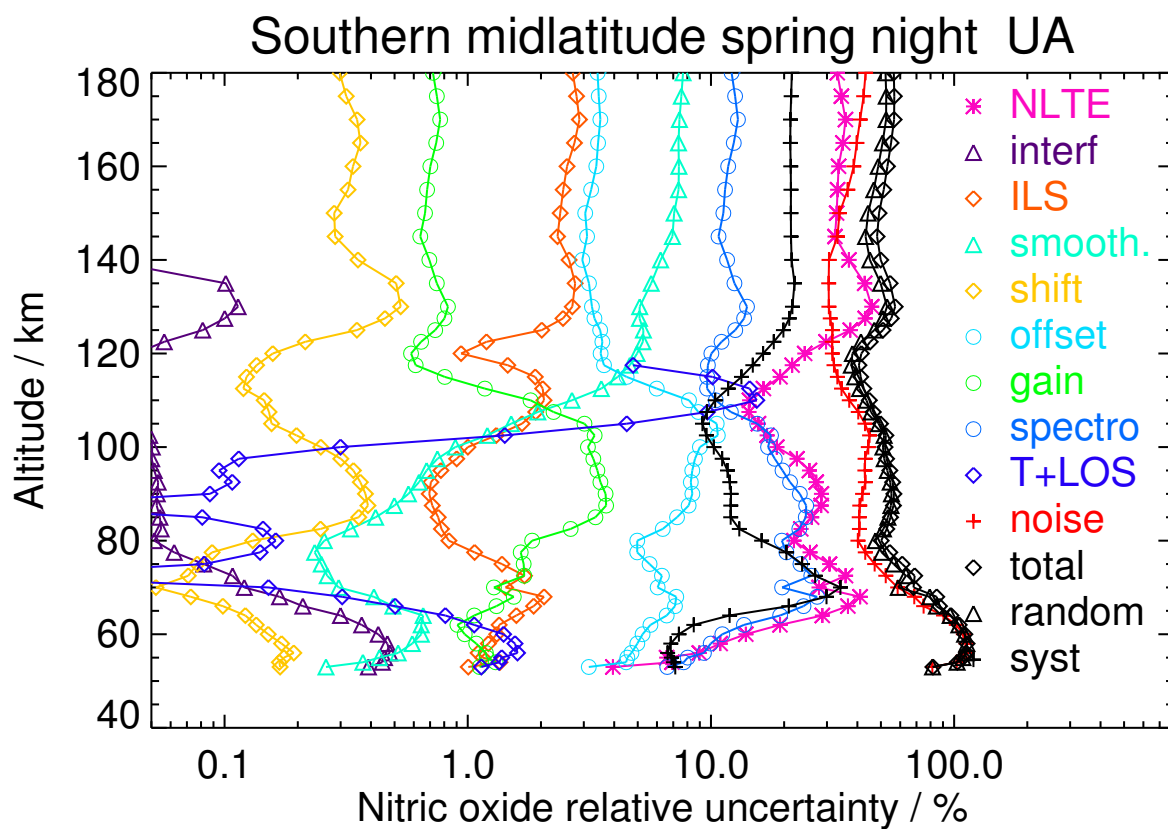

**Figure S124.** V8R\_NOwT\_662 Southern midlatitude spring night

**Table S126.** Nitric oxide error budget for Southern midlatitude summer day. All uncertainties are  $1\sigma$ .

| altitude (km) | mean target (ppmv) | NLTE (%) | interf (%) | ILS (%) | smooth. (%) | shift (%) | offset (%) | gain (%) | spectro (%) | T+LOS (%) | noise (%) | random (%) | syst (%) | total (%) |
|---------------|--------------------|----------|------------|---------|-------------|-----------|------------|----------|-------------|-----------|-----------|------------|----------|-----------|
| 50            | 0.01               | 1.12     | 0.06       | 0.98    | 0.03        | 0.09      | 0.24       | 1.20     | 8.46        | 0.65      | 20.72     | 20.90      | 8.27     | 22.48     |
| 60            | 0.01               | 5.17     | 0.09       | 1.70    | 0.20        | 0.05      | 1.71       | 0.83     | 9.86        | 0.64      | 48.39     | 49.15      | 7.54     | 49.73     |
| 70            | 0.01               | 7.29     | 0.02       | 2.33    | 0.34        | 0.14      | 1.45       | 0.84     | 11.06       | 0.02      | 54.47     | 55.07      | 10.89    | 56.13     |
| 80            | 0.01               | 7.76     | 0.02       | 1.35    | 0.42        | 0.18      | 1.32       | 0.85     | 9.70        | 0.19      | 48.12     | 48.47      | 11.17    | 49.75     |
| 90            | 0.38               | 8.60     | 0.02       | 0.84    | 0.60        | 0.17      | 2.62       | 1.36     | 11.55       | 0.18      | 48.40     | 49.30      | 11.36    | 50.59     |
| 100           | 3.96               | 11.82    | 0.02       | 1.17    | 0.81        | 0.17      | 4.35       | 1.45     | 11.29       | 0.68      | 43.47     | 45.37      | 11.05    | 46.70     |
| 110           | 16.67              | 13.39    | 0.02       | 3.52    | 1.99        | 0.11      | 7.50       | 1.66     | 9.66        | 14.93     | 29.88     | 36.24      | 12.25    | 38.26     |
| 120           | 39.98              | 24.70    | 0.03       | 1.56    | 4.56        | 0.11      | 3.04       | 0.50     | 8.59        | <0.01     | 27.89     | 31.85      | 21.90    | 38.66     |
| 130           | 98.49              | 28.53    | 0.03       | 1.69    | 5.35        | 0.19      | 3.15       | 0.46     | 7.97        | <0.01     | 30.93     | 33.83      | 27.03    | 43.30     |
| 140           | 165.44             | 31.93    | 0.02       | 1.96    | 6.05        | 0.30      | 2.92       | 0.48     | 8.02        | <0.01     | 28.38     | 32.66      | 29.53    | 44.03     |
| 150           | 214.96             | 29.44    | 0.04       | 1.77    | 6.24        | 0.22      | 2.39       | 0.48     | 7.80        | <0.01     | 23.73     | 27.25      | 28.22    | 39.22     |
| 160           | 257.59             | 28.97    | 0.04       | 1.69    | 5.53        | 0.15      | 1.75       | 0.49     | 8.08        | <0.01     | 21.22     | 25.21      | 27.49    | 37.31     |
| 170           | 259.52             | 28.04    | 0.03       | 1.66    | 4.52        | 0.10      | 1.51       | 0.48     | 7.99        | <0.01     | 19.47     | 22.77      | 27.13    | 35.42     |
| 180           | 260.40             | 27.95    | 0.04       | 1.66    | 5.13        | 0.10      | 1.78       | 0.49     | 7.99        | <0.01     | 26.19     | 28.94      | 26.94    | 39.54     |

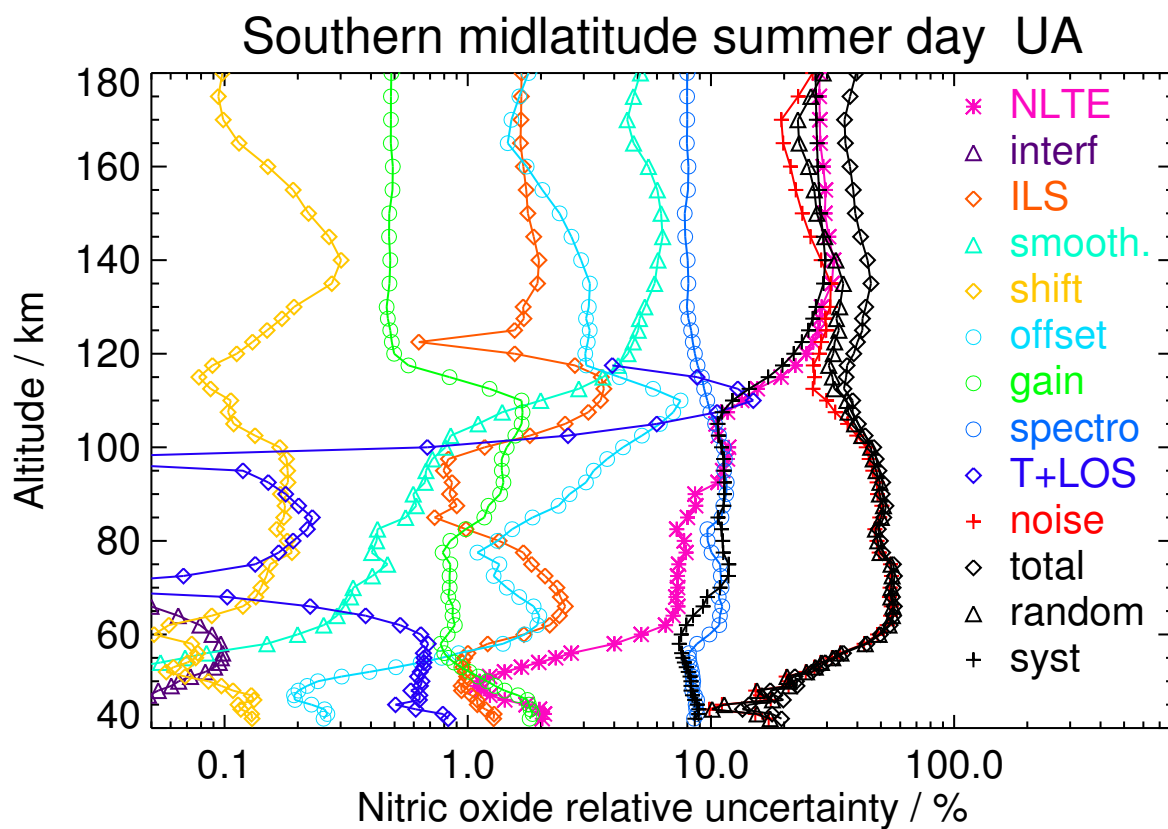

**Figure S125.** V8R\_NOwT\_662 Southern midlatitude summer day

**Table S127.** Nitric oxide error budget for Southern midlatitude summer night. All uncertainties are  $1\sigma$ .

| altitude (km) | mean target (ppmv) | NLTE (%) | interf (%) | ILS (%) | smooth. (%) | shift (%) | offset (%) | gain (%) | spectro (%) | T+LOS (%) | noise (%) | random (%) | syst (%) | total (%) |
|---------------|--------------------|----------|------------|---------|-------------|-----------|------------|----------|-------------|-----------|-----------|------------|----------|-----------|
| 60            | 0.00               | 12.41    | 0.42       | 1.18    | 0.45        | 0.16      | 5.27       | 0.95     | 10.47       | 1.59      | 94.97     | 96.21      | 7.63     | 96.52     |
| 70            | 0.01               | 3.95     | 0.16       | 0.23    | 0.38        | 0.16      | 2.97       | 0.28     | 7.24        | 0.10      | 58.91     | 58.99      | 8.25     | 59.56     |
| 80            | 0.03               | 5.53     | 0.10       | 0.18    | 0.58        | 0.22      | 1.24       | 0.55     | 7.76        | 0.20      | 53.50     | 53.53      | 9.49     | 54.36     |
| 90            | 0.39               | 9.81     | 0.09       | 0.63    | 0.90        | 0.26      | 3.91       | 1.10     | 10.94       | 0.07      | 57.39     | 58.69      | 9.05     | 59.39     |
| 100           | 3.74               | 13.85    | 0.08       | 1.26    | 1.33        | 0.25      | 6.58       | 1.22     | 11.03       | 2.63      | 52.42     | 55.09      | 9.03     | 55.83     |
| 110           | 21.59              | 14.79    | 0.04       | 1.72    | 2.49        | 0.14      | 8.54       | 1.43     | 10.52       | 16.20     | 37.44     | 43.89      | 12.33    | 45.58     |
| 120           | 50.96              | 29.68    | 0.03       | 1.00    | 4.48        | 0.13      | 4.31       | 0.62     | 10.57       | <0.01     | 29.87     | 38.88      | 20.32    | 43.87     |
| 130           | 64.38              | 34.84    | 0.02       | 2.16    | 5.66        | 0.28      | 4.69       | 0.63     | 10.71       | <0.01     | 34.75     | 45.17      | 23.54    | 50.94     |
| 140           | 60.20              | 31.91    | 0.02       | 1.98    | 7.61        | 0.28      | 4.42       | 0.58     | 9.67        | <0.01     | 38.84     | 45.75      | 24.69    | 51.98     |
| 150           | 60.81              | 32.86    | 0.02       | 1.92    | 8.80        | 0.25      | 4.21       | 0.63     | 10.43       | <0.01     | 45.00     | 52.01      | 24.65    | 57.55     |
| 160           | 64.76              | 33.48    | 0.02       | 1.97    | 8.88        | 0.20      | 4.81       | 0.63     | 10.67       | <0.01     | 55.40     | 61.54      | 24.98    | 66.41     |
| 170           | 68.35              | 32.26    | 0.02       | 1.91    | 8.79        | 0.18      | 5.44       | 0.60     | 10.29       | <0.01     | 64.37     | 69.09      | 25.06    | 73.49     |
| 180           | 95.41              | 27.89    | 0.02       | 1.65    | 8.51        | 0.16      | 5.09       | 0.52     | 8.95        | <0.01     | 61.06     | 64.25      | 23.65    | 68.47     |

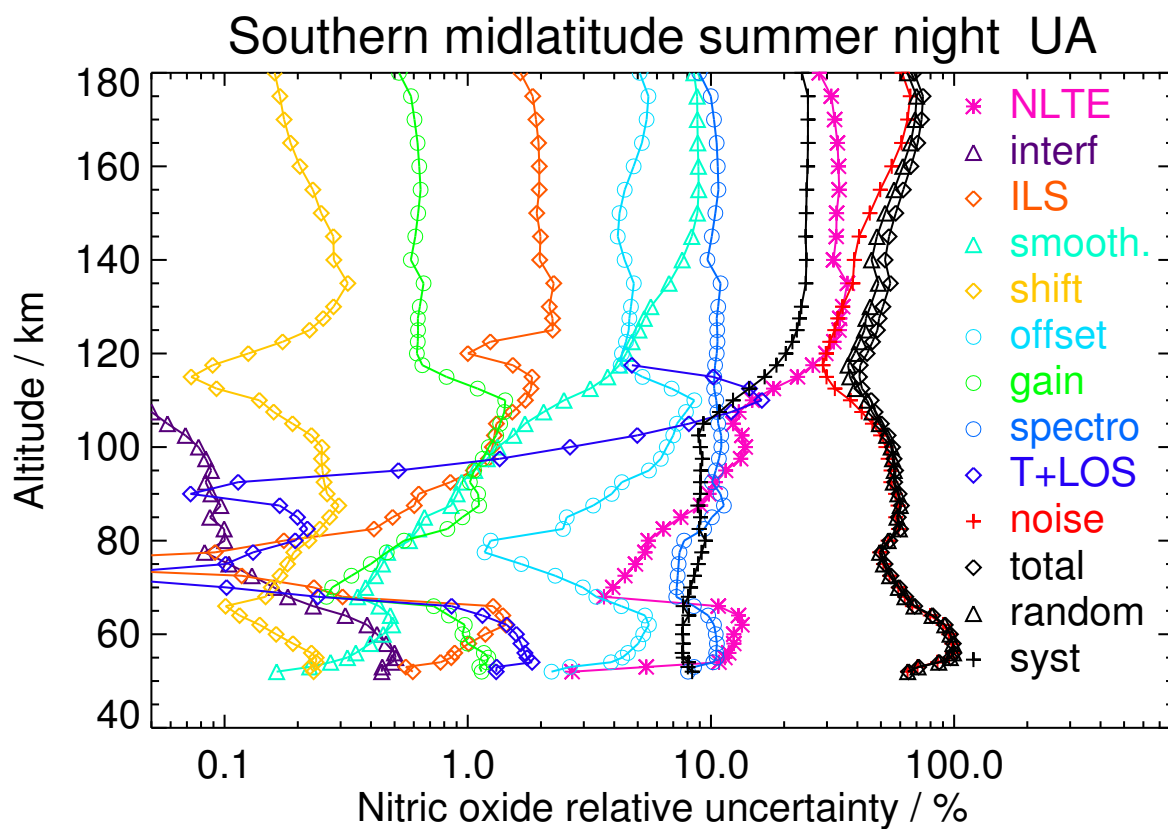

**Figure S126.** V8R\_NOwT\_662 Southern midlatitude summer night

**Table S128.** Nitric oxide error budget for Southern midlatitude autumn day. All uncertainties are  $1\sigma$ .

| altitude (km) | mean target (ppmv) | NLTE (%) | interf (%) | ILS (%) | smooth. (%) | shift (%) | offset (%) | gain (%) | spectro (%) | T+LOS (%) | noise (%) | random (%) | syst (%) | total (%) |
|---------------|--------------------|----------|------------|---------|-------------|-----------|------------|----------|-------------|-----------|-----------|------------|----------|-----------|
| 50            | 0.01               | 3.02     | 0.07       | 1.08    | 0.09        | 0.08      | 0.85       | 1.68     | 9.43        | 0.80      | 29.89     | 30.27      | 8.97     | 31.57     |
| 60            | 0.01               | 13.61    | 0.06       | 2.37    | 0.33        | 0.10      | 3.34       | 1.38     | 13.18       | 1.01      | 55.00     | 57.54      | 9.62     | 58.34     |
| 70            | 0.03               | 16.88    | 0.02       | 2.97    | 0.23        | 0.10      | 2.87       | 1.29     | 15.78       | 0.04      | 47.00     | 51.06      | 12.41    | 52.55     |
| 80            | 0.08               | 13.10    | 0.02       | 1.94    | 0.41        | 0.16      | 2.56       | 1.47     | 16.11       | 0.17      | 41.41     | 45.40      | 9.85     | 46.46     |
| 90            | 1.08               | 25.61    | 0.02       | 1.59    | 0.54        | 0.20      | 3.11       | 1.65     | 13.59       | 0.13      | 36.27     | 44.14      | 14.93    | 46.60     |
| 100           | 6.08               | 24.07    | 0.02       | 1.03    | 0.64        | 0.25      | 3.41       | 1.41     | 11.98       | 0.03      | 33.06     | 40.19      | 14.69    | 42.79     |
| 110           | 48.33              | 19.58    | 0.01       | 1.20    | 0.82        | 0.11      | 6.84       | 1.65     | 12.61       | 7.48      | 22.74     | 31.40      | 13.46    | 34.16     |
| 120           | 88.78              | 32.40    | 0.01       | 1.31    | 3.00        | 0.26      | 2.39       | 0.65     | 10.96       | <0.01     | 24.81     | 36.89      | 21.01    | 42.46     |
| 130           | 103.54             | 33.93    | 0.01       | 2.91    | 4.86        | 0.43      | 2.67       | 0.64     | 10.77       | <0.01     | 28.07     | 39.08      | 23.83    | 45.77     |
| 140           | 123.27             | 33.58    | 0.02       | 2.38    | 6.81        | 0.38      | 3.31       | 0.58     | 9.67        | <0.01     | 32.29     | 40.55      | 26.13    | 48.24     |
| 150           | 160.68             | 27.03    | 0.02       | 2.03    | 7.58        | 0.29      | 2.87       | 0.52     | 8.64        | <0.01     | 28.01     | 32.71      | 24.29    | 40.75     |
| 160           | 203.46             | 25.85    | 0.02       | 2.02    | 7.23        | 0.25      | 2.27       | 0.54     | 8.97        | <0.01     | 25.23     | 30.12      | 23.24    | 38.04     |
| 170           | 233.56             | 25.88    | 0.02       | 2.06    | 6.46        | 0.21      | 2.10       | 0.56     | 9.36        | <0.01     | 24.86     | 30.01      | 22.94    | 37.77     |
| 180           | 264.57             | 26.73    | 0.02       | 2.14    | 7.26        | 0.25      | 2.24       | 0.59     | 9.79        | <0.01     | 30.34     | 35.67      | 22.84    | 42.35     |

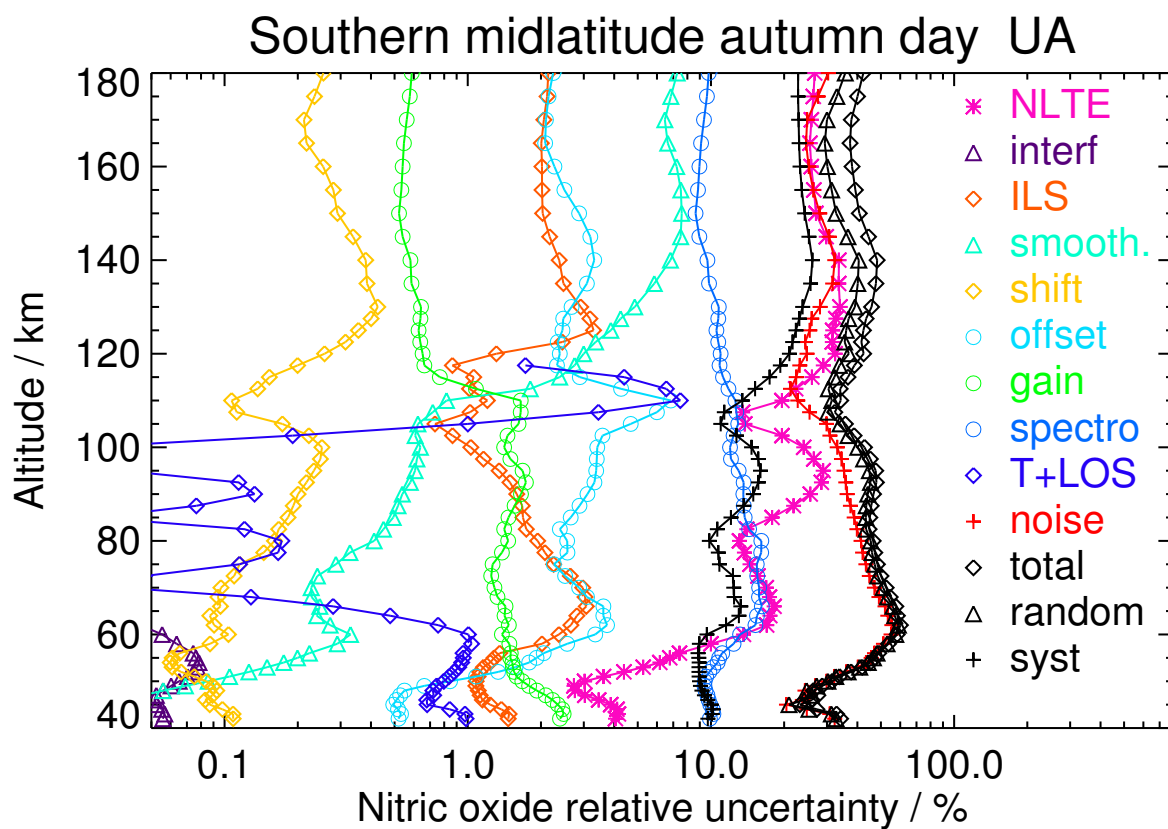

**Figure S127.** V8R\_NOwT\_662 Southern midlatitude autumn day

**Table S129.** Nitric oxide error budget for Southern midlatitude autumn night. All uncertainties are  $1\sigma$ .

| altitude (km) | mean target (ppmv) | NLTE (%) | interf (%) | ILS (%) | smooth. (%) | shift (%) | offset (%) | gain (%) | spectro (%) | T+LOS (%) | noise (%) | random (%) | syst (%) | total (%) |
|---------------|--------------------|----------|------------|---------|-------------|-----------|------------|----------|-------------|-----------|-----------|------------|----------|-----------|
| 50            | 0.00               | 7.56     | 0.21       | 0.69    | 0.14        | 0.14      | 1.48       | 0.37     | 10.07       | 1.37      | 66.81     | 67.23      | 10.31    | 68.02     |
| 60            | 0.01               | 6.07     | 0.14       | 0.87    | 0.27        | 0.07      | 2.86       | 0.88     | 9.93        | 0.85      | 63.80     | 64.50      | 7.47     | 64.93     |
| 70            | 0.03               | 6.03     | 0.06       | 1.43    | 0.23        | 0.15      | 2.44       | 0.83     | 9.33        | 0.10      | 49.51     | 50.21      | 7.91     | 50.83     |
| 80            | 0.17               | 14.56    | 0.03       | 1.11    | 0.35        | 0.22      | 1.69       | 1.28     | 12.45       | 0.11      | 38.49     | 41.98      | 9.59     | 43.06     |
| 90            | 1.59               | 26.91    | 0.03       | 1.72    | 0.58        | 0.29      | 3.00       | 1.96     | 14.53       | 0.39      | 36.99     | 46.53      | 12.42    | 48.16     |
| 100           | 7.97               | 39.11    | 0.07       | 1.91    | 0.89        | 0.27      | 3.13       | 1.66     | 15.56       | 0.31      | 36.69     | 54.33      | 13.55    | 56.00     |
| 110           | 19.60              | 33.98    | 0.03       | 1.57    | 2.51        | 0.12      | 6.72       | 1.52     | 17.43       | 11.00     | 36.59     | 51.01      | 19.31    | 54.54     |
| 120           | 54.25              | 50.58    | 0.02       | 1.39    | 4.27        | 0.28      | 3.18       | 1.09     | 18.42       | <0.01     | 30.31     | 56.13      | 26.41    | 62.03     |
| 130           | 88.66              | 55.72    | 0.02       | 3.11    | 4.48        | 0.59      | 2.94       | 0.90     | 15.12       | <0.01     | 29.30     | 59.67      | 25.91    | 65.05     |
| 140           | 92.16              | 70.37    | 0.02       | 3.66    | 6.04        | 0.75      | 3.15       | 0.85     | 14.27       | <0.01     | 31.55     | 74.32      | 26.24    | 78.81     |
| 150           | 85.39              | 48.32    | 0.02       | 3.34    | 6.89        | 0.43      | 2.81       | 0.88     | 14.73       | <0.01     | 30.53     | 54.47      | 24.18    | 59.60     |
| 160           | 78.15              | 45.38    | 0.02       | 3.31    | 7.07        | 0.28      | 2.68       | 0.92     | 15.59       | <0.01     | 32.29     | 53.21      | 24.14    | 58.43     |
| 170           | 82.81              | 51.77    | 0.02       | 3.86    | 6.48        | 0.25      | 3.02       | 1.07     | 18.20       | <0.01     | 36.41     | 61.59      | 24.72    | 66.37     |
| 180           | 98.32              | 61.18    | 0.02       | 4.65    | 6.68        | 0.29      | 3.06       | 1.31     | 22.35       | <0.01     | 39.51     | 71.99      | 26.43    | 76.68     |

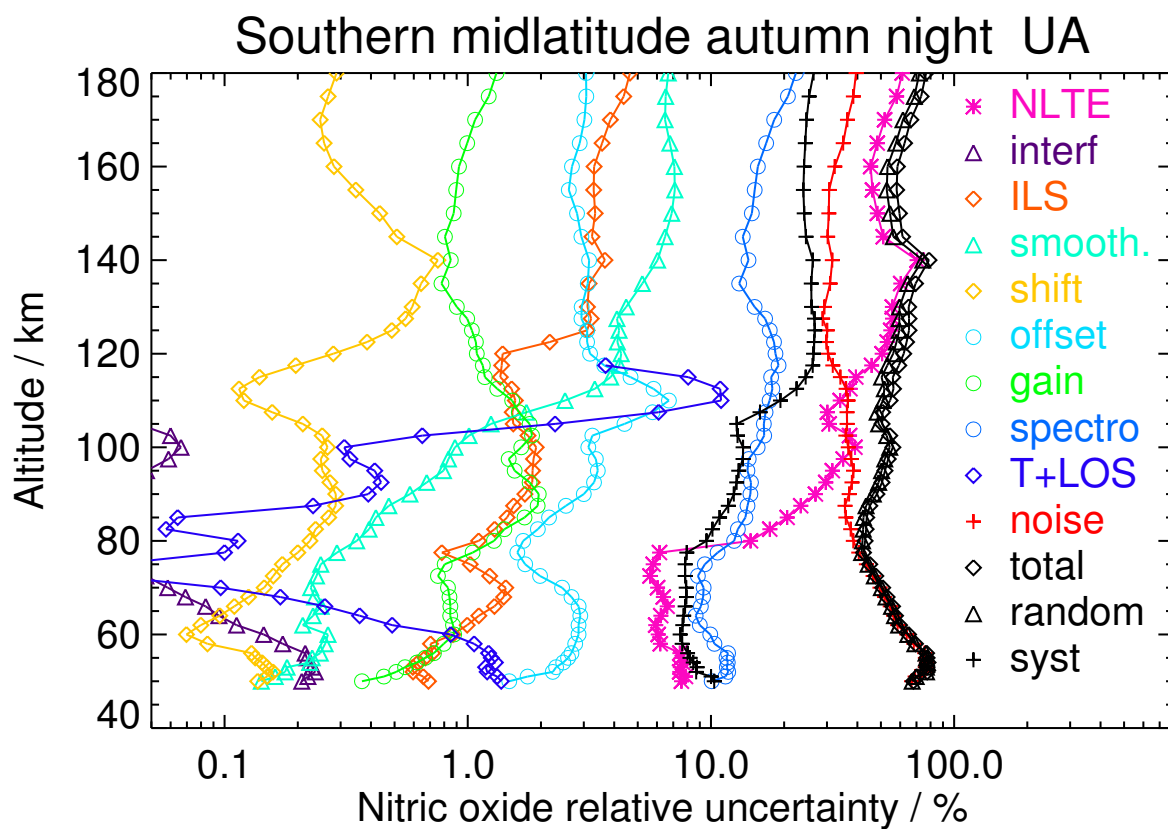

**Figure S128.** V8R\_NOwT\_662 Southern midlatitude autumn night

**Table S130.** Nitric oxide error budget for Southern polar winter day. All uncertainties are  $1\sigma$ .

| altitude (km) | mean target (ppmv) | NLTE (%) | interf (%) | ILS (%) | smooth. (%) | shift (%) | offset (%) | gain (%) | spectro (%) | T+LOS (%) | noise (%) | random (%) | syst (%) | total (%) |
|---------------|--------------------|----------|------------|---------|-------------|-----------|------------|----------|-------------|-----------|-----------|------------|----------|-----------|
| 50            | 0.00               | 2.56     | 0.13       | 0.86    | 0.05        | 0.09      | 0.60       | 1.20     | 8.03        | 0.52      | 31.77     | 32.00      | 7.68     | 32.91     |
| 60            | 0.01               | 3.94     | 0.12       | 1.34    | 0.12        | 0.05      | 2.38       | 0.72     | 6.95        | 0.41      | 53.89     | 54.12      | 6.87     | 54.55     |
| 70            | 0.02               | 5.16     | 0.06       | 1.84    | 0.28        | 0.06      | 2.69       | 0.59     | 7.29        | <0.01     | 56.35     | 56.69      | 7.22     | 57.15     |
| 80            | 0.13               | 8.05     | 0.02       | 1.44    | 0.38        | 0.07      | 1.46       | 0.74     | 7.86        | 0.19      | 47.48     | 47.89      | 9.59     | 48.84     |
| 90            | 1.57               | 15.41    | 0.01       | 1.59    | 0.40        | 0.11      | 1.50       | 1.01     | 8.75        | 0.02      | 34.96     | 36.92      | 13.40    | 39.27     |
| 100           | 16.24              | 16.81    | <0.01      | 1.66    | 0.39        | 0.15      | 2.09       | 1.30     | 9.57        | 0.08      | 27.60     | 31.19      | 13.12    | 33.84     |
| 110           | 68.74              | 6.87     | <0.01      | 1.12    | 1.41        | 0.09      | 5.59       | 1.07     | 8.89        | 5.68      | 25.92     | 28.29      | 8.10     | 29.42     |
| 120           | 116.16             | 19.43    | 0.02       | 0.83    | 4.32        | 0.17      | 3.52       | 0.53     | 8.60        | <0.01     | 28.64     | 31.50      | 17.66    | 36.11     |
| 130           | 159.21             | 30.53    | 0.02       | 2.18    | 5.61        | 0.31      | 3.97       | 0.61     | 10.07       | <0.01     | 34.09     | 41.47      | 23.00    | 47.42     |
| 140           | 171.89             | 31.52    | 0.03       | 2.33    | 6.79        | 0.38      | 3.96       | 0.61     | 9.92        | <0.01     | 34.07     | 41.32      | 24.75    | 48.17     |
| 150           | 228.28             | 31.17    | 0.04       | 2.41    | 7.23        | 0.42      | 3.16       | 0.65     | 10.56       | <0.01     | 30.08     | 38.99      | 23.15    | 45.34     |
| 160           | 264.99             | 27.72    | 0.04       | 2.17    | 6.81        | 0.31      | 2.69       | 0.61     | 9.91        | <0.01     | 28.94     | 35.65      | 22.18    | 41.99     |
| 170           | 288.23             | 28.08    | 0.03       | 2.23    | 6.84        | 0.28      | 2.84       | 0.63     | 10.33       | <0.01     | 33.14     | 39.69      | 21.88    | 45.32     |
| 180           | 298.92             | 28.40    | 0.03       | 2.27    | 7.34        | 0.29      | 3.12       | 0.65     | 10.56       | <0.01     | 40.04     | 46.01      | 21.76    | 50.90     |

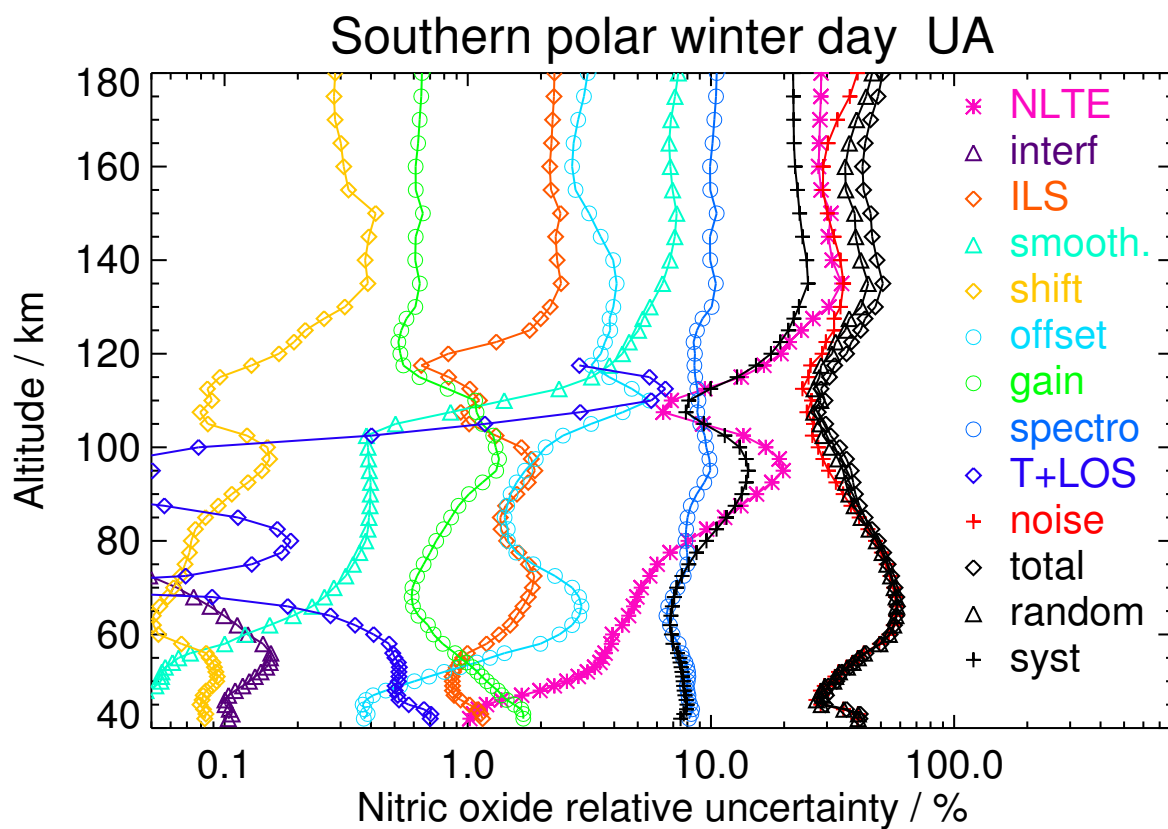

**Figure S129.** V8R\_NOwT\_662 Southern polar winter day

**Table S131.** Nitric oxide error budget for Southern polar winter night. All uncertainties are  $1\sigma$ .

| altitude (km) | mean target (ppmv) | NLTE (%) | interf (%) | ILS (%) | smooth. (%) | shift (%) | offset (%) | gain (%) | spectro (%) | T+LOS (%) | noise (%) | random (%) | syst (%) | total (%) |
|---------------|--------------------|----------|------------|---------|-------------|-----------|------------|----------|-------------|-----------|-----------|------------|----------|-----------|
| 50            | 0.00               | 8.16     | 0.60       | 1.23    | 0.09        | 0.25      | 3.22       | 1.42     | 11.01       | 1.62      | 88.80     | 89.19      | 11.63    | 89.95     |
| 60            | 0.01               | 10.55    | 0.26       | 2.07    | 0.14        | 0.14      | 3.81       | 0.80     | 11.53       | 1.31      | 68.95     | 70.17      | 9.79     | 70.85     |
| 70            | 0.08               | 9.28     | 0.13       | 1.57    | 0.23        | 0.16      | 4.73       | 1.95     | 11.22       | 0.93      | 56.64     | 57.97      | 9.38     | 58.73     |
| 80            | 0.51               | 6.39     | 0.06       | 1.08    | 0.38        | 0.17      | 5.63       | 2.81     | 11.57       | 0.57      | 48.05     | 49.46      | 8.85     | 50.24     |
| 90            | 4.58               | 8.41     | 0.03       | 2.80    | 0.44        | 0.26      | 7.27       | 3.41     | 10.77       | 2.13      | 38.03     | 40.23      | 9.57     | 41.35     |
| 100           | 30.70              | 9.07     | 0.02       | 1.70    | 0.65        | 0.29      | 8.21       | 3.19     | 10.27       | 1.56      | 36.69     | 39.09      | 9.43     | 40.21     |
| 110           | 98.39              | 11.48    | 0.01       | 1.53    | 2.07        | 0.20      | 11.63      | 2.30     | 9.74        | 16.23     | 28.83     | 36.37      | 12.07    | 38.32     |
| 120           | 119.35             | 21.75    | 0.01       | 0.54    | 4.48        | 0.17      | 4.48       | 0.56     | 8.86        | <0.01     | 31.60     | 35.10      | 18.94    | 39.89     |
| 130           | 149.59             | 29.51    | 0.01       | 2.09    | 5.51        | 0.33      | 5.38       | 0.60     | 9.69        | <0.01     | 39.14     | 45.51      | 22.13    | 50.61     |
| 140           | 147.72             | 29.97    | 0.02       | 2.43    | 8.00        | 0.39      | 4.98       | 0.61     | 9.76        | <0.01     | 40.46     | 46.97      | 22.81    | 52.21     |
| 150           | 140.82             | 28.12    | 0.02       | 2.25    | 9.83        | 0.30      | 4.09       | 0.60     | 9.85        | <0.01     | 42.79     | 48.34      | 22.37    | 53.27     |
| 160           | 149.28             | 29.05    | 0.01       | 2.34    | 10.58       | 0.28      | 4.57       | 0.63     | 10.49       | <0.01     | 53.92     | 59.20      | 22.25    | 63.25     |
| 170           | 176.29             | 28.78    | 0.01       | 2.31    | 10.81       | 0.25      | 5.11       | 0.63     | 10.49       | <0.01     | 63.02     | 67.56      | 22.22    | 71.12     |
| 180           | 211.61             | 27.20    | 0.01       | 2.17    | 10.97       | 0.23      | 5.32       | 0.60     | 9.95        | <0.01     | 66.74     | 70.33      | 22.38    | 73.80     |

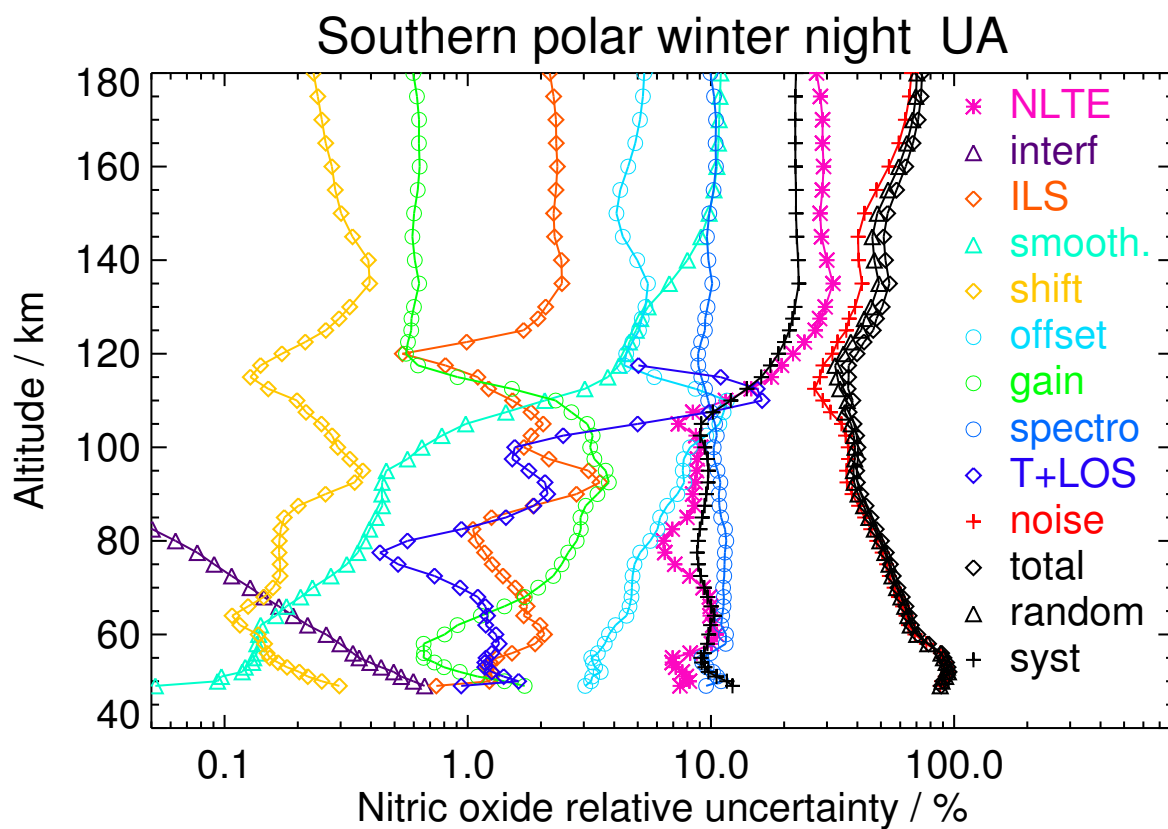

**Figure S130.** V8R\_NOwT\_662 Southern polar winter night

**Table S132.** Nitric oxide error budget for Southern polar spring day. All uncertainties are  $1\sigma$ .

| altitude (km) | mean target (ppmv) | NLTE (%) | interf (%) | ILS (%) | smooth. (%) | shift (%) | offset (%) | gain (%) | spectro (%) | T+LOS (%) | noise (%) | random (%) | syst (%) | total (%) |
|---------------|--------------------|----------|------------|---------|-------------|-----------|------------|----------|-------------|-----------|-----------|------------|----------|-----------|
| 50            | 0.01               | 1.89     | 0.09       | 1.24    | 0.03        | 0.11      | 0.32       | 1.19     | 8.62        | 0.65      | 23.43     | 23.65      | 8.41     | 25.11     |
| 60            | 0.01               | 8.29     | 0.12       | 2.39    | 0.19        | 0.12      | 1.98       | 0.91     | 12.29       | 0.98      | 47.29     | 48.77      | 9.44     | 49.68     |
| 70            | 0.07               | 10.42    | 0.03       | 3.64    | 0.11        | 0.30      | 1.47       | 1.07     | 9.97        | 0.06      | 30.24     | 32.50      | 9.09     | 33.75     |
| 80            | 0.09               | 7.32     | 0.02       | 1.92    | 0.24        | 0.25      | 2.23       | 0.86     | 9.25        | 0.15      | 34.39     | 35.41      | 8.78     | 36.49     |
| 90            | 1.15               | 33.82    | 0.03       | 1.62    | 0.37        | 0.47      | 1.96       | 1.38     | 12.22       | 0.08      | 33.05     | 46.77      | 14.38    | 48.93     |
| 100           | 10.10              | 19.37    | 0.03       | 1.49    | 0.41        | 0.40      | 2.42       | 1.31     | 12.07       | 0.32      | 31.40     | 36.82      | 12.72    | 38.95     |
| 110           | 34.76              | 16.99    | 0.02       | 3.41    | 1.27        | 0.15      | 7.16       | 1.58     | 9.84        | 12.05     | 24.31     | 31.02      | 15.04    | 34.47     |
| 120           | 88.06              | 30.93    | 0.03       | 0.94    | 2.93        | 0.12      | 2.21       | 0.52     | 8.94        | <0.01     | 23.06     | 31.42      | 24.40    | 39.78     |
| 130           | 142.91             | 30.07    | 0.02       | 2.10    | 3.84        | 0.26      | 1.97       | 0.51     | 8.70        | <0.01     | 23.83     | 30.36      | 25.48    | 39.64     |
| 140           | 188.58             | 32.11    | 0.03       | 2.06    | 5.47        | 0.35      | 2.32       | 0.52     | 8.74        | <0.01     | 26.56     | 33.16      | 27.44    | 43.04     |
| 150           | 239.23             | 28.53    | 0.04       | 1.90    | 6.28        | 0.28      | 2.07       | 0.50     | 8.20        | <0.01     | 22.91     | 27.76      | 26.14    | 38.13     |
| 160           | 282.47             | 27.20    | 0.05       | 1.81    | 5.82        | 0.16      | 1.66       | 0.51     | 8.32        | <0.01     | 20.58     | 25.20      | 25.25    | 35.68     |
| 170           | 356.72             | 27.91    | 0.04       | 1.87    | 4.45        | 0.12      | 1.45       | 0.53     | 8.73        | <0.01     | 18.15     | 24.01      | 25.18    | 34.79     |
| 180           | 397.75             | 28.04    | 0.04       | 1.86    | 4.91        | 0.13      | 1.57       | 0.54     | 8.82        | <0.01     | 22.67     | 27.47      | 25.56    | 37.53     |

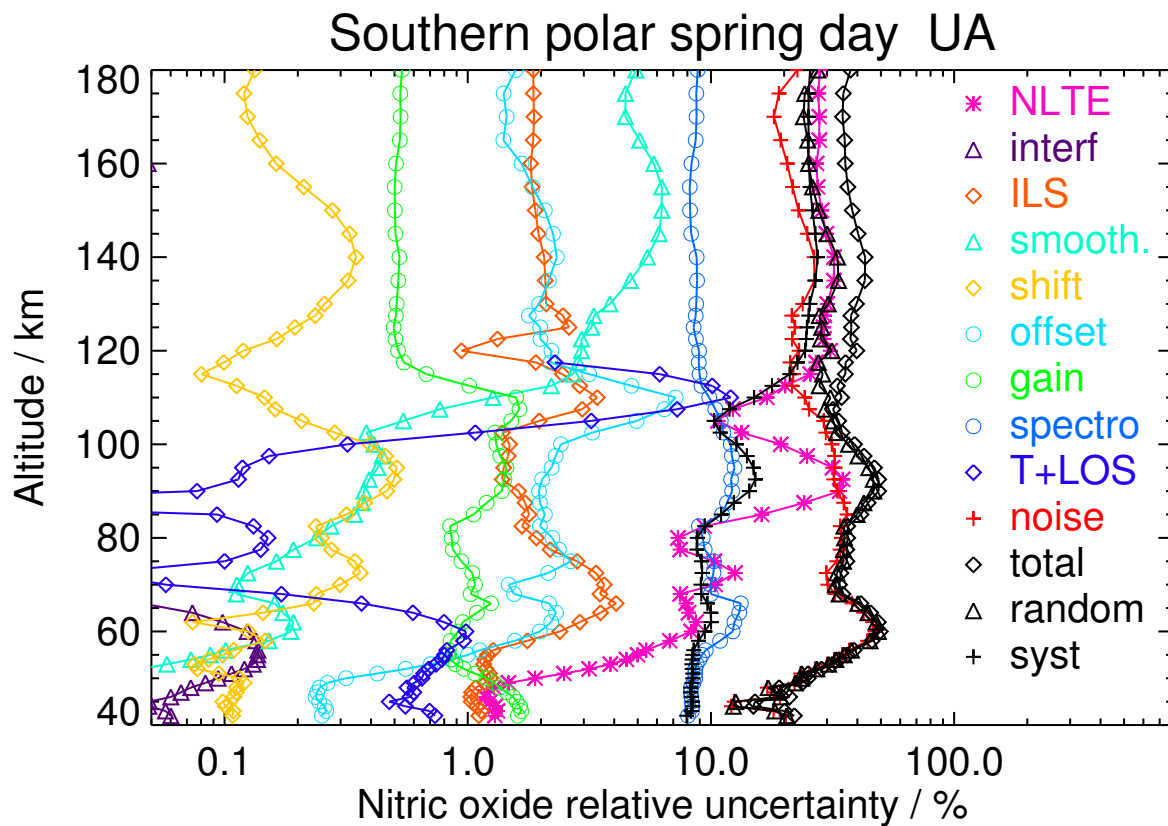

**Figure S131.** V8R\_NOwT\_662 Southern polar spring day



**Table S133.** Nitric oxide error budget for Southern polar spring night. All uncertainties are  $1\sigma$ .

| altitude (km) | mean target (ppmv) | NLTE (%) | interf (%) | ILS (%) | smooth. (%) | shift (%) | offset (%) | gain (%) | spectro (%) | T+LOS (%) | noise (%) | random (%) | syst (%) | total (%) |
|---------------|--------------------|----------|------------|---------|-------------|-----------|------------|----------|-------------|-----------|-----------|------------|----------|-----------|
| 60            | 0.01               | 6.73     | 0.16       | 1.94    | 0.20        | 0.06      | 2.73       | 1.32     | 11.42       | 1.25      | 57.00     | 58.10      | 8.00     | 58.65     |
| 70            | 0.05               | 8.34     | 0.08       | 1.06    | 0.25        | 0.14      | 2.05       | 1.07     | 10.96       | 0.14      | 48.66     | 49.95      | 8.29     | 50.64     |
| 80            | 0.51               | 9.72     | 0.04       | 1.32    | 0.25        | 0.29      | 1.68       | 2.57     | 9.42        | 0.20      | 37.21     | 38.94      | 7.95     | 39.74     |
| 90            | 3.97               | 14.17    | 0.04       | 3.89    | 0.44        | 0.40      | 6.95       | 4.72     | 9.04        | 0.11      | 42.46     | 45.49      | 10.10    | 46.60     |
| 100           | 18.02              | 12.13    | 0.04       | 4.09    | 0.59        | 0.44      | 10.85      | 5.06     | 10.48       | 0.40      | 39.72     | 43.76      | 8.98     | 44.67     |
| 110           | 43.34              | 27.42    | 0.04       | 3.13    | 1.82        | 0.11      | 12.92      | 2.59     | 12.49       | 17.71     | 29.07     | 44.54      | 16.42    | 47.47     |
| 120           | 60.73              | 31.25    | 0.03       | 0.88    | 3.91        | 0.15      | 3.39       | 0.58     | 9.72        | <0.01     | 28.22     | 37.31      | 22.44    | 43.54     |
| 130           | 85.51              | 36.01    | 0.02       | 2.33    | 4.58        | 0.35      | 3.24       | 0.59     | 9.87        | <0.01     | 28.38     | 39.94      | 25.32    | 47.29     |
| 140           | 99.11              | 34.51    | 0.01       | 2.38    | 6.19        | 0.37      | 3.21       | 0.58     | 9.57        | <0.01     | 30.32     | 39.46      | 26.44    | 47.50     |
| 150           | 110.84             | 35.02    | 0.01       | 2.40    | 6.99        | 0.41      | 2.78       | 0.63     | 10.25       | <0.01     | 29.02     | 39.75      | 25.63    | 47.29     |
| 160           | 130.26             | 33.43    | 0.01       | 2.26    | 6.97        | 0.32      | 2.44       | 0.63     | 10.33       | <0.01     | 28.35     | 38.25      | 24.99    | 45.69     |
| 170           | 153.36             | 34.09    | 0.01       | 2.34    | 6.76        | 0.30      | 2.53       | 0.65     | 10.72       | <0.01     | 30.00     | 40.15      | 24.96    | 47.28     |
| 180           | 211.63             | 33.97    | 0.01       | 2.32    | 7.44        | 0.30      | 2.63       | 0.66     | 10.71       | <0.01     | 34.55     | 43.48      | 25.28    | 50.30     |

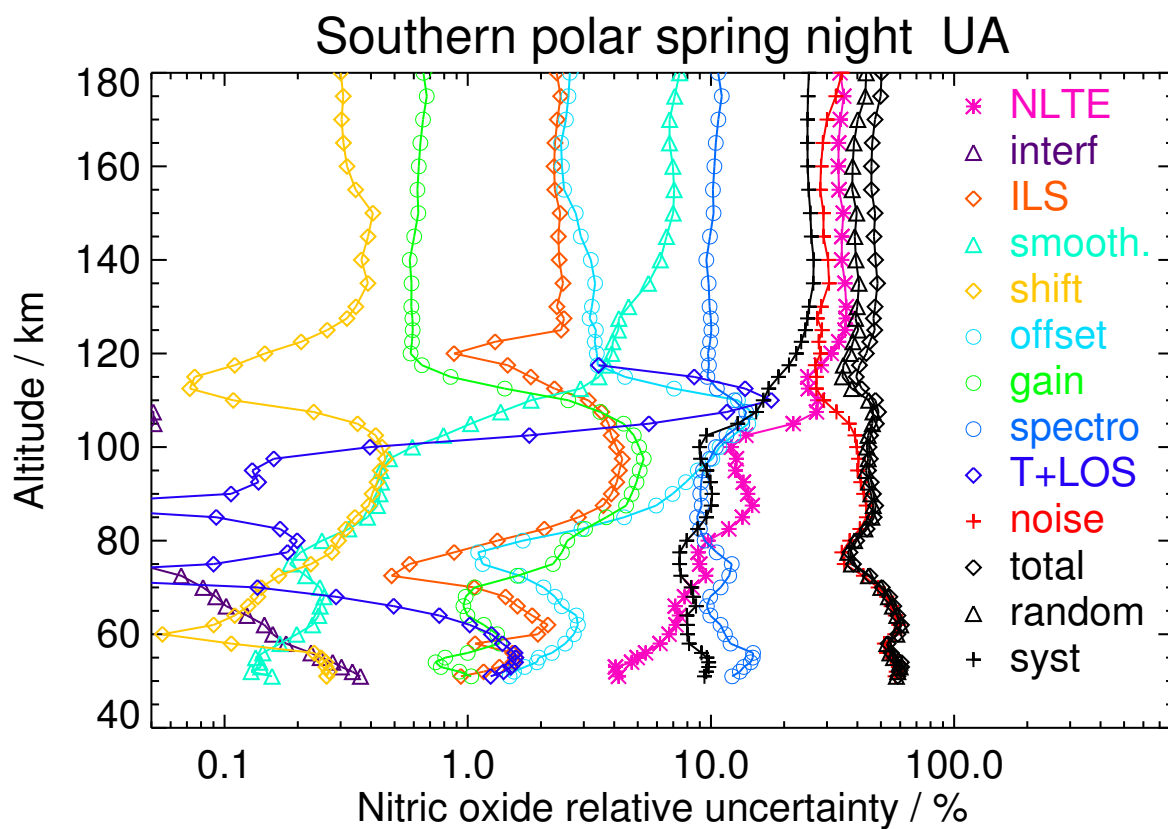

**Figure S132.** V8R\_NOwT\_662 Southern polar spring night

**Table S134.** Nitric oxide error budget for Southern polar summer day. All uncertainties are  $1\sigma$ .

| altitude (km) | mean target (ppmv) | NLTE (%) | interf (%) | ILS (%) | smooth. (%) | shift (%) | offset (%) | gain (%) | spectro (%) | T+LOS (%) | noise (%) | random (%) | syst (%) | total (%) |
|---------------|--------------------|----------|------------|---------|-------------|-----------|------------|----------|-------------|-----------|-----------|------------|----------|-----------|
| 50            | 0.01               | 1.08     | 0.06       | 0.87    | 0.01        | 0.11      | 0.26       | 1.06     | 8.17        | 0.64      | 16.42     | 16.54      | 8.14     | 18.43     |
| 60            | 0.00               | 4.46     | 0.16       | 2.00    | 0.10        | 0.17      | 2.15       | 0.85     | 9.24        | 0.91      | 42.46     | 43.04      | 8.13     | 43.80     |
| 70            | 0.01               | 11.05    | 0.06       | 3.29    | 0.23        | 0.25      | 3.68       | 1.28     | 10.88       | 0.15      | 47.99     | 49.91      | 8.85     | 50.69     |
| 80            | 0.09               | 9.53     | 0.02       | 2.58    | 0.14        | 0.30      | 3.47       | 1.62     | 13.60       | 0.27      | 35.59     | 35.77      | 16.87    | 39.55     |
| 90            | 0.35               | 7.55     | 0.02       | 2.88    | 0.34        | 0.31      | 2.98       | 1.48     | 12.39       | 0.28      | 32.51     | 33.67      | 12.39    | 35.88     |
| 100           | 11.32              | 11.80    | 0.02       | 3.59    | 0.31        | 0.26      | 5.47       | 2.44     | 11.89       | 5.70      | 29.01     | 33.32      | 9.66     | 34.69     |
| 110           | 30.11              | 14.84    | 0.03       | 5.00    | 1.01        | 0.18      | 7.33       | 1.98     | 8.74        | 19.54     | 19.79     | 30.50      | 14.96    | 33.97     |
| 120           | 68.47              | 26.95    | 0.05       | 1.51    | 3.27        | 0.11      | 3.06       | 0.46     | 8.35        | <0.01     | 26.22     | 30.46      | 24.05    | 38.81     |
| 130           | 148.60             | 30.43    | 0.04       | 3.30    | 4.28        | 0.23      | 2.71       | 0.49     | 8.71        | <0.01     | 27.63     | 33.60      | 25.95    | 42.45     |
| 140           | 251.56             | 28.17    | 0.03       | 2.28    | 5.10        | 0.50      | 2.08       | 0.53     | 8.62        | <0.01     | 25.40     | 30.72      | 24.61    | 39.36     |
| 150           | 313.21             | 26.63    | 0.04       | 1.92    | 5.28        | 0.34      | 1.70       | 0.53     | 8.49        | <0.01     | 21.39     | 26.72      | 23.66    | 35.69     |
| 160           | 364.08             | 25.98    | 0.03       | 1.82    | 5.08        | 0.26      | 1.39       | 0.54     | 8.70        | <0.01     | 19.95     | 25.24      | 23.31    | 34.36     |
| 170           | 477.11             | 26.46    | 0.02       | 1.82    | 3.54        | 0.21      | 1.31       | 0.56     | 9.09        | <0.01     | 17.16     | 23.49      | 23.31    | 33.09     |
| 180           | 538.08             | 26.12    | 0.03       | 1.71    | 3.85        | 0.23      | 1.52       | 0.56     | 8.98        | <0.01     | 21.64     | 26.38      | 23.58    | 35.38     |

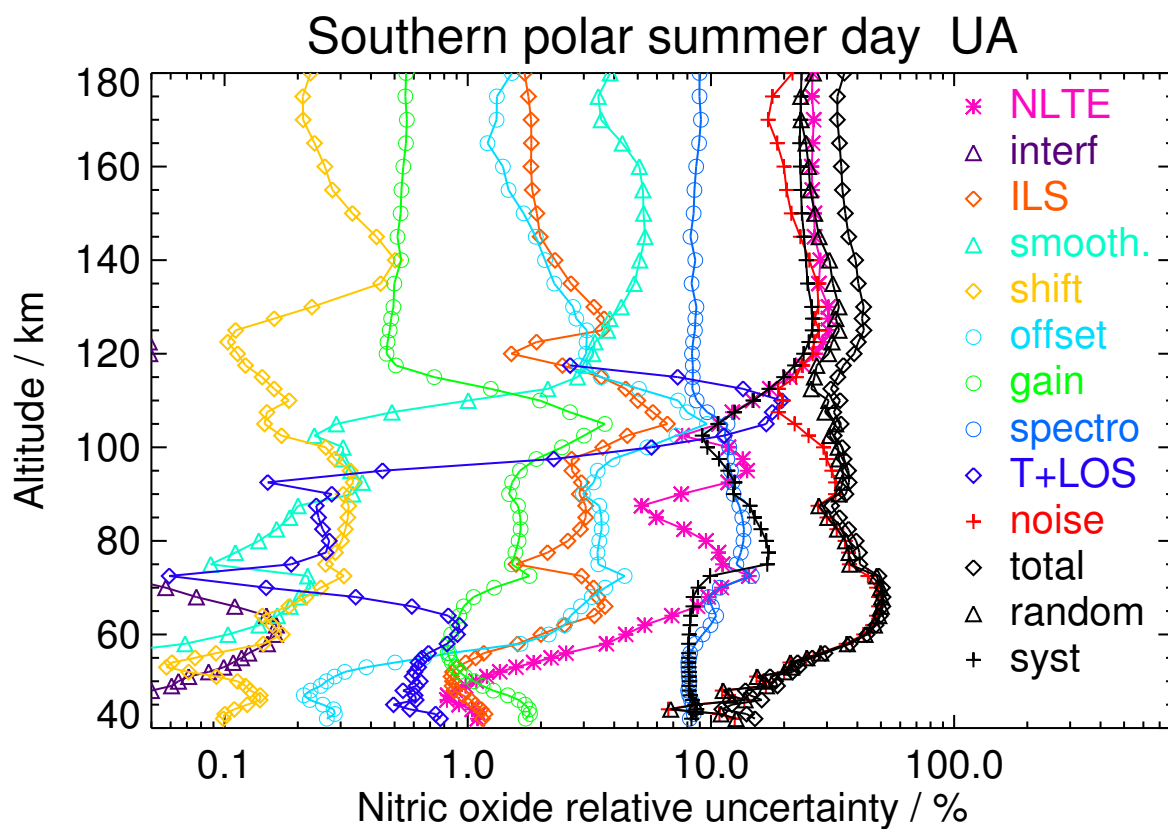

**Figure S133.** V8R\_NOwT\_662 Southern polar summer day

**Table S135.** Nitric oxide error budget for Southern polar summer night. All uncertainties are  $1\sigma$ .

| altitude (km) | mean target (ppmv) | NLTE (%) | interf (%) | ILS (%) | smooth. (%) | shift (%) | offset (%) | gain (%) | spectro (%) | T+LOS (%) | noise (%) | random (%) | syst (%) | total (%) |
|---------------|--------------------|----------|------------|---------|-------------|-----------|------------|----------|-------------|-----------|-----------|------------|----------|-----------|
| 50            | 0.00               | 2.13     | 0.25       | 1.55    | 0.08        | 0.27      | 1.88       | 0.84     | 10.68       | 1.23      | 54.04     | 54.09      | 11.03    | 55.20     |
| 60            | 0.00               | 8.56     | 0.28       | 2.10    | 0.38        | 0.11      | 3.65       | 1.30     | 13.00       | 1.38      | 63.78     | 65.42      | 7.24     | 65.82     |
| 70            | 0.08               | 7.97     | 0.03       | 1.92    | 0.09        | 0.18      | 1.46       | 0.92     | 8.18        | 0.09      | 37.62     | 38.29      | 9.30     | 39.40     |
| 80            | 0.22               | 8.93     | 0.02       | 1.19    | 0.15        | 0.21      | 1.32       | 1.02     | 7.88        | 0.17      | 33.61     | 34.61      | 8.80     | 35.71     |
| 90            | 2.32               | 22.24    | 0.03       | 2.28    | 0.32        | 0.28      | 2.54       | 2.06     | 10.87       | 0.06      | 29.42     | 36.85      | 11.68    | 38.65     |
| 100           | 8.27               | 16.09    | 0.04       | 1.16    | 0.66        | 0.27      | 3.66       | 2.74     | 10.89       | 2.56      | 35.76     | 40.18      | 8.40     | 41.05     |
| 110           | 15.35              | 17.54    | 0.04       | 2.79    | 2.26        | 0.13      | 8.50       | 1.77     | 10.75       | 16.91     | 33.10     | 41.92      | 11.65    | 43.51     |
| 120           | 35.12              | 32.06    | 0.04       | 1.32    | 4.10        | 0.19      | 3.71       | 0.61     | 10.52       | <0.01     | 29.67     | 41.19      | 18.84    | 45.29     |
| 130           | 47.44              | 36.37    | 0.03       | 3.16    | 5.17        | 0.33      | 3.85       | 0.66     | 11.27       | <0.01     | 32.15     | 45.04      | 22.51    | 50.35     |
| 140           | 58.45              | 34.32    | 0.04       | 2.38    | 6.99        | 0.24      | 3.87       | 0.67     | 11.19       | <0.01     | 34.60     | 44.19      | 24.85    | 50.70     |
| 150           | 74.85              | 37.20    | 0.04       | 2.51    | 7.63        | 0.31      | 3.61       | 0.74     | 12.24       | <0.01     | 35.57     | 47.12      | 25.63    | 53.64     |
| 160           | 88.36              | 36.36    | 0.03       | 2.52    | 7.28        | 0.30      | 3.54       | 0.73     | 12.12       | <0.01     | 38.33     | 48.80      | 25.08    | 54.87     |
| 170           | 93.98              | 35.55    | 0.03       | 2.54    | 6.74        | 0.31      | 3.81       | 0.72     | 11.96       | <0.01     | 43.17     | 52.15      | 24.86    | 57.77     |
| 180           | 107.81             | 33.75    | 0.03       | 2.07    | 6.69        | 0.32      | 3.59       | 0.68     | 11.26       | <0.01     | 42.78     | 51.04      | 23.54    | 56.21     |

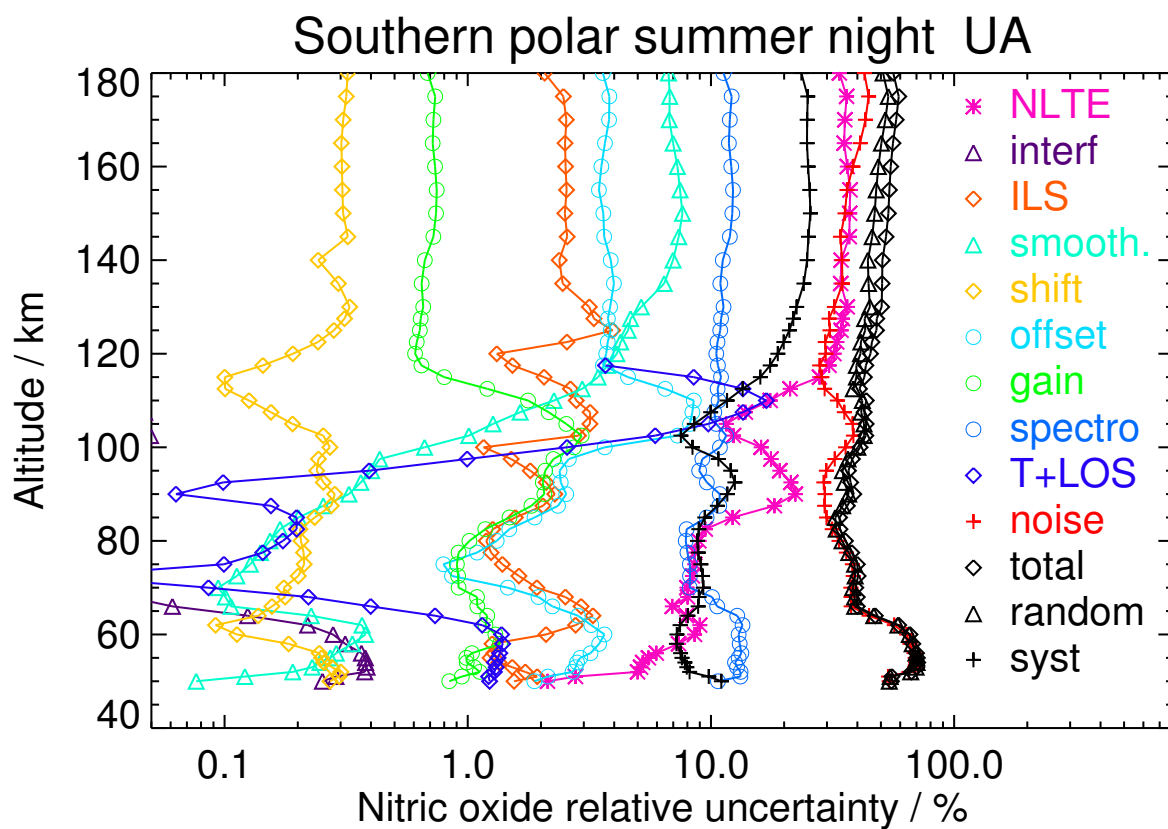

**Figure S134.** V8R\_NOwT\_662 Southern polar summer night

**Table S136.** Nitric oxide error budget for Southern polar autumn day. All uncertainties are  $1\sigma$ .

| altitude (km) | mean target (ppmv) | NLTE (%) | interf (%) | ILS (%) | smooth. (%) | shift (%) | offset (%) | gain (%) | spectro (%) | T+LOS (%) | noise (%) | random (%) | syst (%) | total (%) |
|---------------|--------------------|----------|------------|---------|-------------|-----------|------------|----------|-------------|-----------|-----------|------------|----------|-----------|
| 50            | 0.00               | 5.21     | 0.16       | 1.49    | 0.19        | 0.10      | 2.22       | 1.32     | 9.31        | 0.96      | 54.43     | 54.94      | 8.29     | 55.56     |
| 60            | 0.00               | 11.89    | 0.14       | 3.26    | 0.34        | 0.06      | 3.60       | 1.43     | 17.08       | 0.71      | 60.14     | 63.32      | 8.19     | 63.85     |
| 70            | 0.02               | 12.94    | 0.06       | 3.61    | 0.44        | 0.08      | 3.45       | 1.05     | 13.50       | 0.06      | 58.25     | 60.46      | 10.65    | 61.40     |
| 80            | 0.08               | 14.59    | 0.04       | 2.27    | 0.63        | 0.10      | 3.84       | 0.95     | 11.10       | 0.20      | 57.16     | 59.37      | 9.99     | 60.21     |
| 90            | 1.04               | 16.71    | 0.02       | 1.78    | 0.71        | 0.14      | 3.22       | 0.91     | 9.07        | 0.14      | 45.39     | 47.74      | 12.58    | 49.36     |
| 100           | 8.16               | 12.97    | 0.01       | 1.15    | 0.61        | 0.14      | 3.55       | 1.68     | 12.62       | 0.04      | 34.68     | 37.89      | 10.57    | 39.34     |
| 110           | 40.39              | 12.62    | <0.01      | 0.91    | 1.34        | 0.07      | 6.41       | 1.36     | 11.04       | 7.83      | 26.74     | 31.91      | 9.19     | 33.21     |
| 120           | 63.62              | 26.63    | 0.01       | 0.93    | 3.82        | 0.24      | 2.93       | 0.58     | 9.65        | <0.01     | 27.06     | 35.23      | 17.82    | 39.49     |
| 130           | 80.14              | 30.52    | 0.02       | 2.19    | 5.05        | 0.36      | 3.06       | 0.59     | 9.89        | <0.01     | 29.27     | 38.62      | 20.85    | 43.89     |
| 140           | 85.16              | 30.43    | 0.02       | 2.18    | 6.79        | 0.26      | 3.44       | 0.60     | 10.08       | <0.01     | 32.70     | 40.80      | 22.27    | 46.48     |
| 150           | 111.16             | 28.05    | 0.02       | 2.13    | 7.69        | 0.27      | 2.96       | 0.59     | 9.84        | <0.01     | 30.89     | 37.96      | 21.67    | 43.71     |
| 160           | 150.58             | 28.36    | 0.02       | 2.31    | 7.56        | 0.34      | 2.81       | 0.63     | 10.57       | <0.01     | 30.79     | 38.49      | 21.31    | 43.99     |
| 170           | 191.67             | 30.45    | 0.02       | 2.56    | 6.81        | 0.36      | 3.01       | 0.70     | 11.74       | <0.01     | 33.59     | 42.50      | 21.20    | 47.50     |
| 180           | 238.23             | 30.46    | 0.02       | 2.58    | 7.12        | 0.36      | 3.11       | 0.70     | 11.81       | <0.01     | 37.44     | 45.69      | 21.20    | 50.37     |

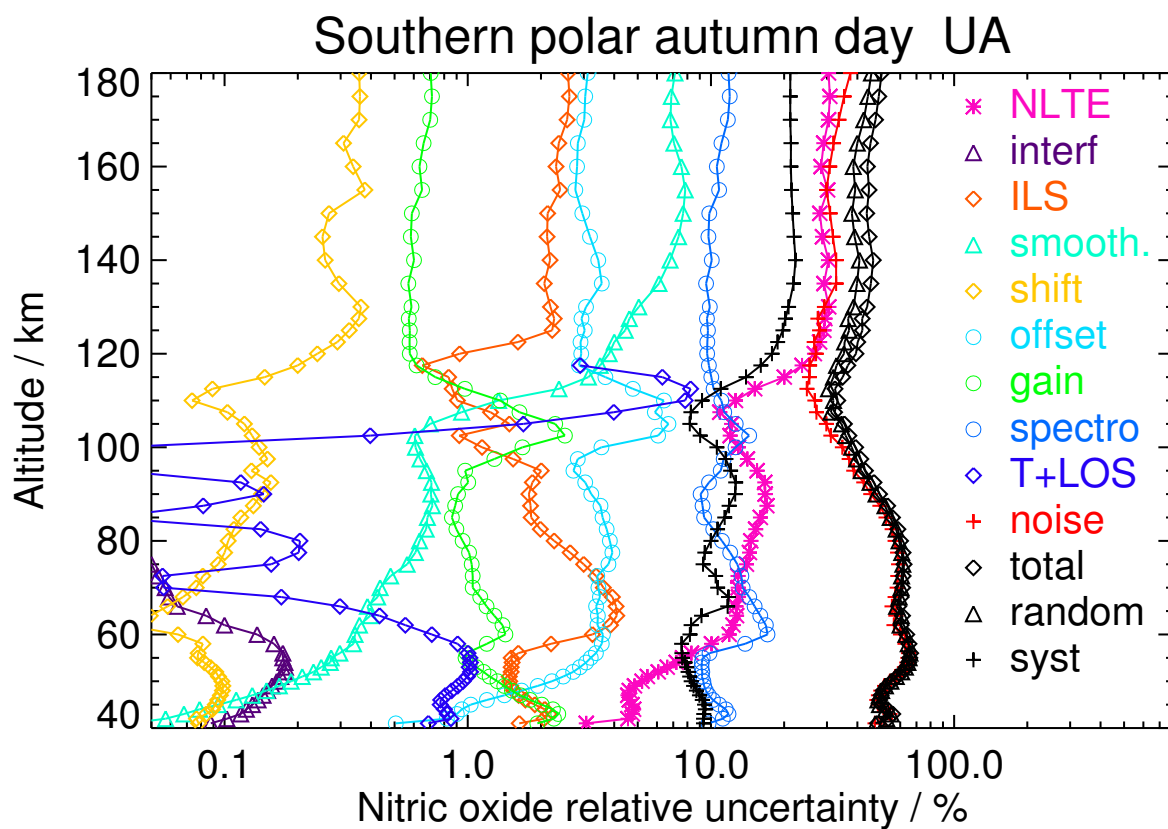

**Figure S135.** V8R\_NOwT\_662 Southern polar autumn day

**Table S137.** Nitric oxide error budget for Southern polar autumn night. All uncertainties are  $1\sigma$ .

| altitude (km) | mean target (ppmv) | NLTE (%) | interf (%) | ILS (%) | smooth. (%) | shift (%) | offset (%) | gain (%) | spectro (%) | T+LOS (%) | noise (%) | random (%) | syst (%) | total (%) |
|---------------|--------------------|----------|------------|---------|-------------|-----------|------------|----------|-------------|-----------|-----------|------------|----------|-----------|
| 60            | 0.01               | 21.52    | 0.17       | 2.09    | 0.24        | 0.14      | 6.25       | 1.96     | 17.97       | 1.80      | 60.52     | 64.62      | 17.98    | 67.07     |
| 70            | 0.05               | 32.20    | 0.10       | 2.39    | 0.37        | 0.13      | 10.01      | 2.75     | 21.42       | 1.20      | 60.86     | 69.08      | 23.29    | 72.90     |
| 80            | 0.38               | 23.50    | 0.07       | 1.86    | 0.44        | 0.29      | 9.97       | 2.92     | 18.53       | 0.44      | 53.93     | 60.50      | 15.99    | 62.58     |
| 90            | 4.32               | 18.59    | 0.06       | 1.76    | 0.45        | 0.34      | 7.39       | 2.82     | 15.04       | 1.86      | 41.83     | 47.61      | 11.18    | 48.90     |
| 100           | 29.66              | 14.33    | 0.04       | 1.19    | 0.31        | 0.39      | 8.81       | 3.15     | 11.30       | 1.44      | 36.00     | 40.33      | 9.68     | 41.48     |
| 110           | 115.02             | 20.71    | 0.02       | 1.90    | 1.17        | 0.16      | 11.17      | 2.74     | 11.89       | 13.62     | 26.53     | 36.43      | 16.42    | 39.96     |
| 120           | 125.17             | 28.60    | <0.01      | 0.92    | 3.49        | 0.23      | 2.86       | 0.59     | 9.31        | <0.01     | 26.98     | 33.86      | 22.53    | 40.67     |
| 130           | 134.96             | 30.23    | <0.01      | 2.10    | 4.18        | 0.32      | 2.70       | 0.57     | 9.24        | <0.01     | 25.84     | 33.66      | 23.74    | 41.19     |
| 140           | 137.18             | 29.83    | 0.01       | 2.01    | 6.30        | 0.31      | 3.23       | 0.54     | 8.78        | <0.01     | 31.01     | 36.76      | 25.13    | 44.53     |
| 150           | 162.10             | 28.32    | 0.01       | 2.04    | 7.88        | 0.30      | 2.95       | 0.55     | 9.06        | <0.01     | 29.27     | 35.18      | 24.06    | 42.62     |
| 160           | 184.11             | 27.87    | 0.01       | 2.13    | 8.29        | 0.31      | 2.59       | 0.58     | 9.54        | <0.01     | 28.51     | 35.07      | 23.05    | 41.96     |
| 170           | 205.63             | 26.93    | 0.01       | 2.15    | 8.57        | 0.28      | 2.70       | 0.58     | 9.50        | <0.01     | 32.32     | 37.73      | 22.85    | 44.11     |
| 180           | 232.17             | 27.68    | 0.01       | 2.20    | 9.30        | 0.28      | 2.87       | 0.60     | 9.84        | <0.01     | 38.17     | 43.46      | 23.05    | 49.19     |

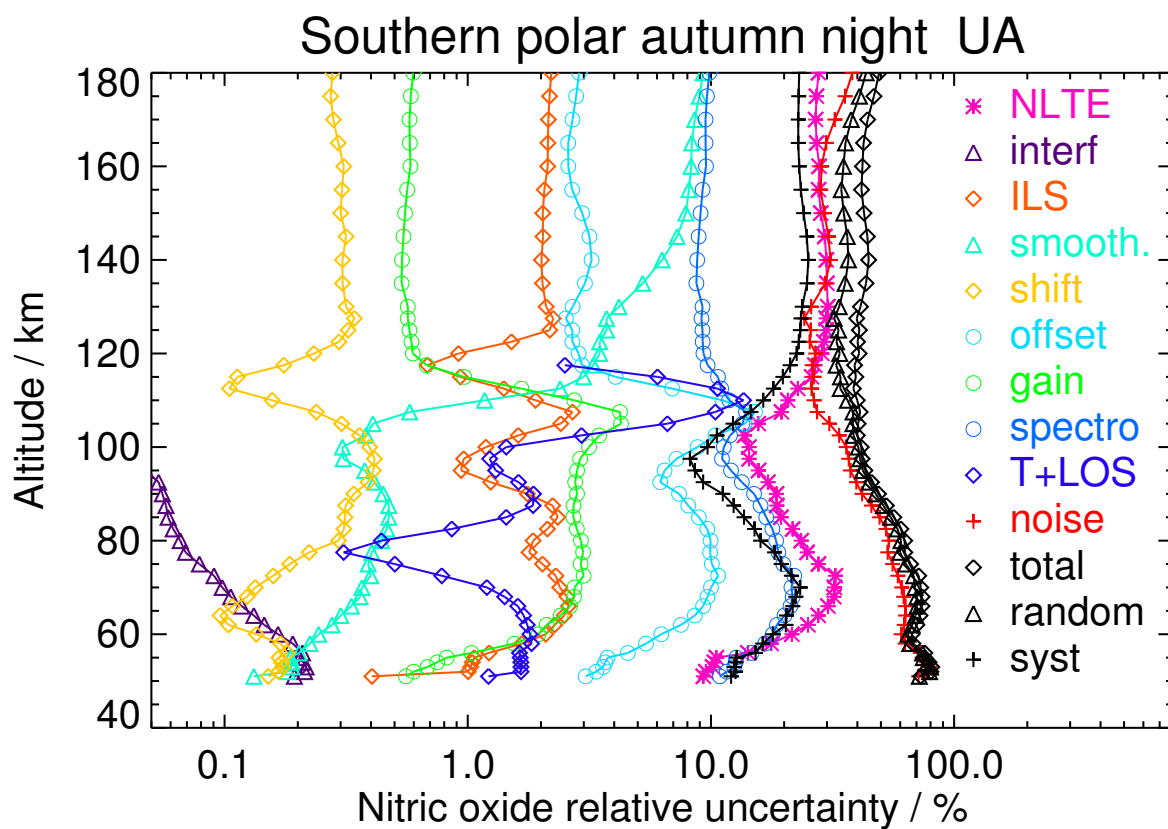

**Figure S136.** V8R\_NOwT\_662 Southern polar autumn night

**Table S138.** Nitric oxide error budget for Northern polar winter day, high solar activity. All uncertainties are  $1\sigma$ .

| altitude (km) | mean target (ppmv) | NLTE (%) | interf (%) | ILS (%) | smooth. (%) | shift (%) | offset (%) | gain (%) | spectro (%) | T+LOS (%) | noise (%) | random (%) | syst (%) | total (%) |
|---------------|--------------------|----------|------------|---------|-------------|-----------|------------|----------|-------------|-----------|-----------|------------|----------|-----------|
| 50            | 0.02               | 5.38     | 0.04       | 0.48    | 0.05        | 0.09      | 1.35       | 3.61     | 11.42       | 1.42      | 28.16     | 29.60      | 9.66     | 31.14     |
| 60            | 0.02               | 8.61     | 0.05       | 2.39    | 0.11        | 0.16      | 2.92       | 1.78     | 12.21       | 0.58      | 37.90     | 39.80      | 9.70     | 40.96     |
| 70            | 0.08               | 9.37     | 0.04       | 3.94    | 0.16        | 0.11      | 2.78       | 1.16     | 10.94       | 0.03      | 38.37     | 39.95      | 10.41    | 41.28     |
| 80            | 0.55               | 12.19    | 0.02       | 3.27    | 0.19        | 0.17      | 2.36       | 1.60     | 11.24       | 0.14      | 30.24     | 33.19      | 10.32    | 34.76     |
| 90            | 4.33               | 22.24    | 0.04       | 1.76    | 0.31        | 0.53      | 5.41       | 1.83     | 10.22       | 0.32      | 31.97     | 37.60      | 15.61    | 40.71     |
| 100           | 19.56              | 23.40    | 0.04       | 1.38    | 0.29        | 0.57      | 4.59       | 2.40     | 10.60       | 0.46      | 29.77     | 36.62      | 15.31    | 39.69     |
| 110           | 99.32              | 14.38    | 0.01       | 0.88    | 0.86        | 0.14      | 5.38       | 1.40     | 9.15        | 10.03     | 20.41     | 25.27      | 14.19    | 28.98     |
| 120           | 214.00             | 29.88    | 0.03       | 0.76    | 2.38        | 0.27      | 1.89       | 0.50     | 8.14        | <0.01     | 22.72     | 27.95      | 26.53    | 38.54     |
| 130           | 287.78             | 27.46    | 0.08       | 1.74    | 2.84        | 0.43      | 1.22       | 0.49     | 8.10        | <0.01     | 20.47     | 25.50      | 24.52    | 35.38     |
| 140           | 302.72             | 30.46    | 0.09       | 1.78    | 3.76        | 0.33      | 1.06       | 0.52     | 8.66        | <0.01     | 19.47     | 26.65      | 26.28    | 37.43     |
| 150           | 326.76             | 26.24    | 0.06       | 1.81    | 3.95        | 0.19      | 1.08       | 0.51     | 8.49        | <0.01     | 16.00     | 21.94      | 23.56    | 32.20     |
| 160           | 383.72             | 25.07    | 0.08       | 1.80    | 3.97        | 0.09      | 0.88       | 0.50     | 8.54        | <0.01     | 14.38     | 20.53      | 22.52    | 30.47     |
| 170           | 481.57             | 25.44    | 0.05       | 1.89    | 2.42        | 0.12      | 1.04       | 0.50     | 8.65        | <0.01     | 12.58     | 20.05      | 22.12    | 29.85     |
| 180           | 553.22             | 26.79    | 0.08       | 2.05    | 2.48        | 0.19      | 0.91       | 0.55     | 9.12        | <0.01     | 12.31     | 20.42      | 23.38    | 31.05     |

45 S5 NO error contribution profile plots and tabulated values for RR UA data (V8R\_NOWT\_662) at high solar activity conditions

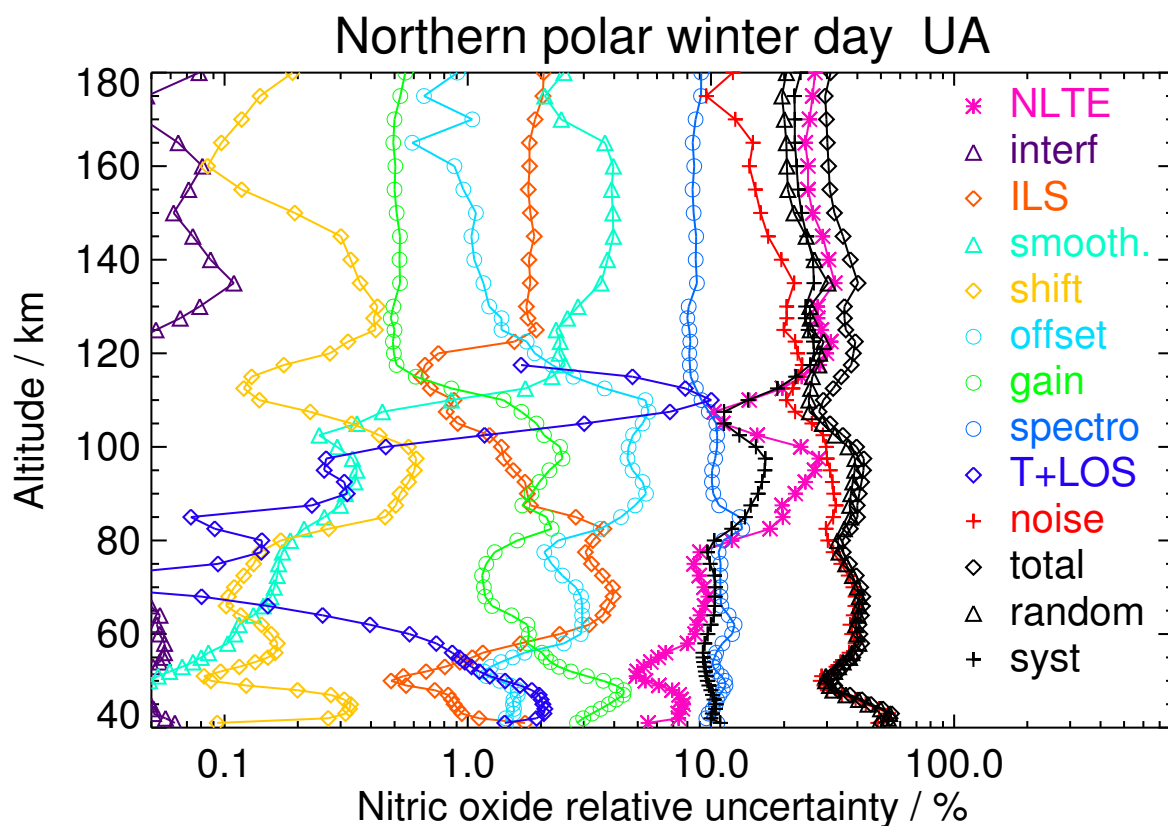

**Figure S137.** V8R\_NOWT\_662 Northern polar winter day, high solar activity

**Table S139.** Nitric oxide error budget for Northern polar winter night, high solar activity. All uncertainties are  $1\sigma$ .

| altitude (km) | mean target (ppmv) | NLTE (%) | interf (%) | ILS (%) | smooth. (%) | shift (%) | offset (%) | gain (%) | spectro (%) | T+LOS (%) | noise (%) | random (%) | syst (%) | total (%) |
|---------------|--------------------|----------|------------|---------|-------------|-----------|------------|----------|-------------|-----------|-----------|------------|----------|-----------|
| 50            | 0.00               | 4.13     | 0.12       | 2.76    | 0.06        | 0.19      | 2.10       | 1.51     | 14.21       | 2.08      | 47.54     | 48.73      | 11.09    | 49.97     |
| 60            | 0.13               | 16.02    | 0.03       | 0.54    | 0.06        | 0.53      | 2.70       | 2.36     | 7.51        | 4.32      | 43.50     | 46.79      | 6.94     | 47.30     |
| 70            | 0.37               | 13.93    | 0.02       | 2.41    | 0.12        | 0.60      | 5.80       | 4.69     | 14.28       | 0.87      | 39.35     | 44.17      | 7.56     | 44.82     |
| 80            | 1.56               | 11.18    | 0.02       | 2.44    | 0.17        | 0.41      | 4.81       | 2.45     | 11.31       | 0.21      | 33.11     | 36.59      | 6.80     | 37.21     |
| 90            | 11.88              | 20.06    | 0.03       | 1.19    | 0.21        | 0.45      | 4.66       | 1.99     | 7.84        | 2.13      | 30.78     | 36.61      | 10.17    | 37.99     |
| 100           | 41.64              | 19.02    | 0.03       | 2.53    | 0.23        | 0.42      | 6.02       | 2.77     | 7.55        | 2.07      | 30.45     | 36.41      | 8.67     | 37.43     |
| 110           | 134.37             | 18.15    | 0.02       | 1.67    | 0.79        | 0.37      | 5.89       | 1.65     | 8.87        | 12.56     | 24.13     | 30.54      | 16.00    | 34.48     |
| 120           | 282.99             | 33.57    | <0.01      | 1.01    | 1.74        | 0.34      | 1.58       | 0.61     | 9.57        | <0.01     | 21.10     | 30.77      | 26.91    | 40.88     |
| 130           | 340.01             | 27.49    | <0.01      | 1.73    | 2.31        | 0.35      | 0.98       | 0.51     | 8.18        | <0.01     | 18.95     | 24.30      | 24.52    | 34.52     |
| 140           | 258.61             | 28.87    | 0.01       | 1.78    | 4.07        | 0.27      | 1.15       | 0.51     | 8.32        | <0.01     | 20.44     | 25.74      | 26.07    | 36.63     |
| 150           | 230.75             | 25.98    | 0.02       | 1.83    | 5.59        | 0.27      | 1.55       | 0.49     | 8.01        | <0.01     | 19.63     | 23.52      | 24.67    | 34.08     |
| 160           | 233.98             | 25.57    | 0.03       | 1.98    | 5.91        | 0.25      | 1.37       | 0.52     | 8.51        | <0.01     | 18.47     | 23.74      | 23.34    | 33.29     |
| 170           | 214.35             | 25.78    | 0.03       | 2.16    | 4.88        | 0.25      | 1.24       | 0.54     | 8.93        | <0.01     | 16.04     | 22.47      | 22.95    | 32.12     |
| 180           | 210.24             | 26.90    | 0.03       | 2.18    | 5.74        | 0.27      | 1.43       | 0.55     | 9.14        | <0.01     | 21.90     | 27.19      | 24.24    | 36.42     |

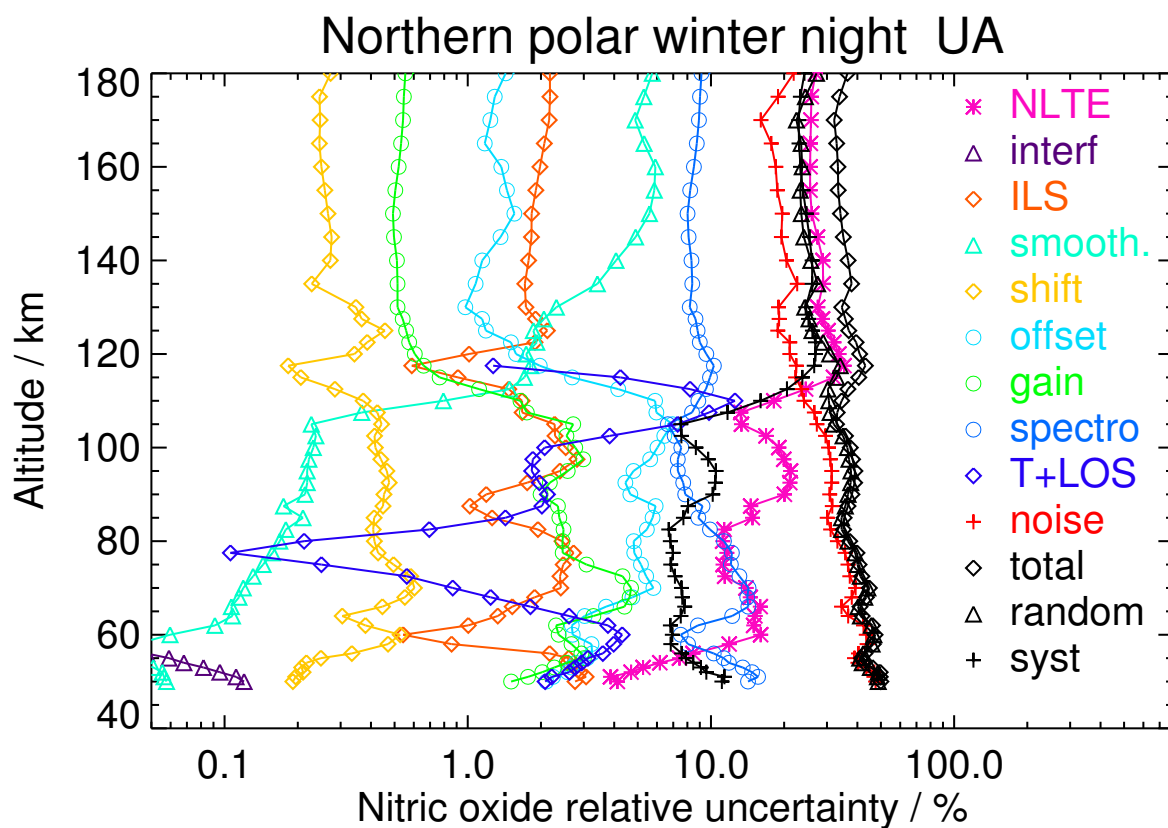

**Figure S138.** V8R\_NOwT\_662 Northern polar winter night, high solar activity

**Table S140.** Nitric oxide error budget for Northern polar spring day, high solar activity. All uncertainties are  $1\sigma$ .

| altitude (km) | mean target (ppmv) | NLTE (%) | interf (%) | ILS (%) | smooth. (%) | shift (%) | offset (%) | gain (%) | spectro (%) | T+LOS (%) | noise (%) | random (%) | syst (%) | total (%) |
|---------------|--------------------|----------|------------|---------|-------------|-----------|------------|----------|-------------|-----------|-----------|------------|----------|-----------|
| 50            | 0.01               | 3.41     | 0.07       | 1.50    | 0.03        | 0.11      | 0.61       | 1.59     | 9.94        | 0.81      | 21.58     | 22.04      | 9.81     | 24.12     |
| 60            | 0.01               | 14.44    | 0.10       | 2.71    | 0.18        | 0.16      | 2.73       | 1.14     | 13.47       | 0.90      | 44.23     | 47.37      | 10.93    | 48.61     |
| 70            | 0.03               | 18.16    | 0.06       | 4.28    | 0.21        | 0.29      | 2.37       | 1.08     | 11.72       | 0.05      | 38.48     | 42.99      | 11.17    | 44.42     |
| 80            | 0.12               | 17.92    | 0.06       | 2.03    | 0.28        | 0.28      | 3.08       | 1.34     | 13.00       | 0.18      | 33.01     | 38.75      | 9.69     | 39.94     |
| 90            | 1.05               | 26.26    | 0.09       | 2.41    | 0.48        | 0.54      | 3.51       | 1.01     | 10.73       | 0.06      | 33.24     | 41.05      | 15.63    | 43.92     |
| 100           | 9.12               | 22.45    | 0.09       | 1.67    | 0.48        | 0.57      | 3.42       | 0.97     | 10.27       | 0.01      | 29.81     | 35.59      | 15.73    | 38.91     |
| 110           | 46.38              | 22.95    | 0.04       | 2.74    | 0.80        | 0.25      | 5.75       | 1.43     | 10.59       | 9.59      | 20.28     | 28.70      | 19.02    | 34.43     |
| 120           | 125.48             | 34.60    | 0.06       | 0.84    | 2.21        | 0.37      | 1.59       | 0.48     | 8.29        | <0.01     | 20.30     | 28.53      | 29.53    | 41.06     |
| 130           | 223.16             | 27.46    | 0.16       | 1.90    | 2.53        | 0.44      | 0.97       | 0.50     | 8.41        | <0.01     | 18.24     | 24.23      | 24.12    | 34.19     |
| 140           | 276.07             | 25.72    | 0.15       | 1.66    | 3.11        | 0.27      | 0.88       | 0.49     | 8.15        | <0.01     | 17.23     | 21.39      | 24.11    | 32.23     |
| 150           | 396.24             | 25.78    | 0.13       | 1.71    | 3.69        | 0.29      | 0.98       | 0.49     | 8.18        | <0.01     | 15.00     | 20.12      | 23.86    | 31.21     |
| 160           | 475.54             | 23.59    | 0.10       | 1.68    | 4.00        | 0.11      | 0.85       | 0.48     | 8.18        | <0.01     | 13.17     | 17.44      | 22.64    | 28.58     |
| 170           | 643.60             | 23.62    | 0.06       | 1.71    | 2.32        | 0.08      | 1.14       | 0.46     | 7.88        | <0.01     | 12.53     | 16.73      | 22.52    | 28.05     |
| 180           | 765.61             | 24.62    | 0.12       | 1.74    | 2.12        | 0.10      | 0.80       | 0.50     | 8.40        | <0.01     | 10.14     | 14.96      | 23.76    | 28.07     |

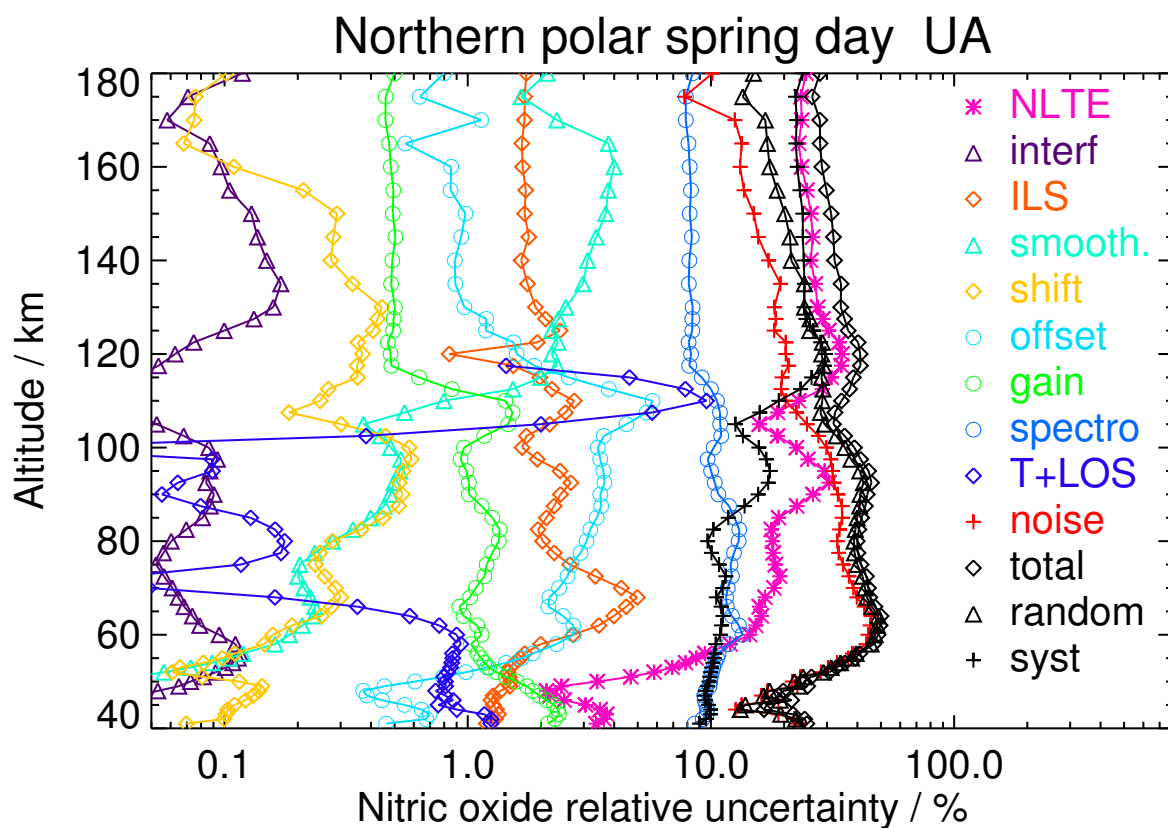

**Figure S139.** V8R\_NOwT\_662 Northern polar spring day, high solar activity



**Table S141.** Nitric oxide error budget for Northern polar spring night, high solar activity. All uncertainties are  $1\sigma$ .

| altitude (km) | mean target (ppmv) | NLTE (%) | interf (%) | ILS (%) | smooth. (%) | shift (%) | offset (%) | gain (%) | spectro (%) | T+LOS (%) | noise (%) | random (%) | syst (%) | total (%) |
|---------------|--------------------|----------|------------|---------|-------------|-----------|------------|----------|-------------|-----------|-----------|------------|----------|-----------|
| 50            | 0.00               | 7.18     | 0.27       | 0.85    | 0.14        | 0.24      | 1.27       | 1.06     | 7.99        | 1.24      | 55.59     | 55.81      | 9.76     | 56.66     |
| 60            | 0.01               | 17.67    | 0.20       | 1.61    | 0.33        | 0.10      | 4.40       | 1.19     | 12.19       | 1.44      | 57.87     | 61.46      | 7.60     | 61.93     |
| 70            | 0.03               | 17.51    | 0.08       | 2.07    | 0.33        | 0.28      | 4.08       | 1.11     | 10.92       | 0.16      | 47.12     | 50.52      | 10.80    | 51.66     |
| 80            | 0.10               | 10.67    | 0.09       | 1.26    | 0.40        | 0.41      | 3.41       | 1.22     | 12.04       | 0.21      | 41.80     | 43.74      | 10.37    | 44.95     |
| 90            | 1.92               | 31.72    | 0.08       | 2.49    | 0.37        | 0.82      | 3.17       | 2.50     | 10.47       | 0.09      | 29.75     | 43.29      | 12.26    | 44.99     |
| 100           | 9.49               | 12.31    | 0.07       | 0.84    | 0.58        | 0.57      | 3.66       | 1.81     | 7.74        | 0.94      | 38.39     | 40.50      | 7.99     | 41.28     |
| 110           | 55.58              | 17.57    | 0.04       | 2.89    | 1.35        | 0.17      | 6.83       | 1.98     | 9.91        | 12.26     | 25.42     | 32.03      | 15.44    | 35.55     |
| 120           | 139.69             | 25.57    | 0.04       | 1.06    | 2.67        | 0.21      | 2.09       | 0.51     | 8.56        | <0.01     | 22.76     | 26.44      | 23.65    | 35.48     |
| 130           | 184.66             | 29.96    | 0.06       | 1.91    | 3.31        | 0.32      | 1.65       | 0.53     | 9.13        | <0.01     | 22.45     | 30.57      | 23.84    | 38.76     |
| 140           | 162.25             | 30.87    | 0.05       | 1.99    | 5.08        | 0.38      | 1.73       | 0.54     | 9.03        | <0.01     | 24.41     | 32.34      | 24.85    | 40.79     |
| 150           | 163.74             | 26.93    | 0.08       | 1.95    | 5.57        | 0.26      | 1.58       | 0.53     | 8.80        | <0.01     | 21.31     | 27.80      | 22.84    | 35.98     |
| 160           | 174.13             | 25.79    | 0.09       | 1.98    | 4.66        | 0.14      | 1.21       | 0.55     | 9.18        | <0.01     | 19.32     | 25.87      | 21.94    | 33.92     |
| 170           | 224.22             | 24.67    | 0.07       | 2.00    | 2.91        | 0.07      | 1.12       | 0.53     | 8.90        | <0.01     | 15.32     | 21.74      | 21.54    | 30.60     |
| 180           | 232.48             | 24.89    | 0.08       | 1.75    | 3.26        | 0.10      | 1.35       | 0.53     | 8.96        | <0.01     | 20.58     | 25.25      | 22.40    | 33.75     |

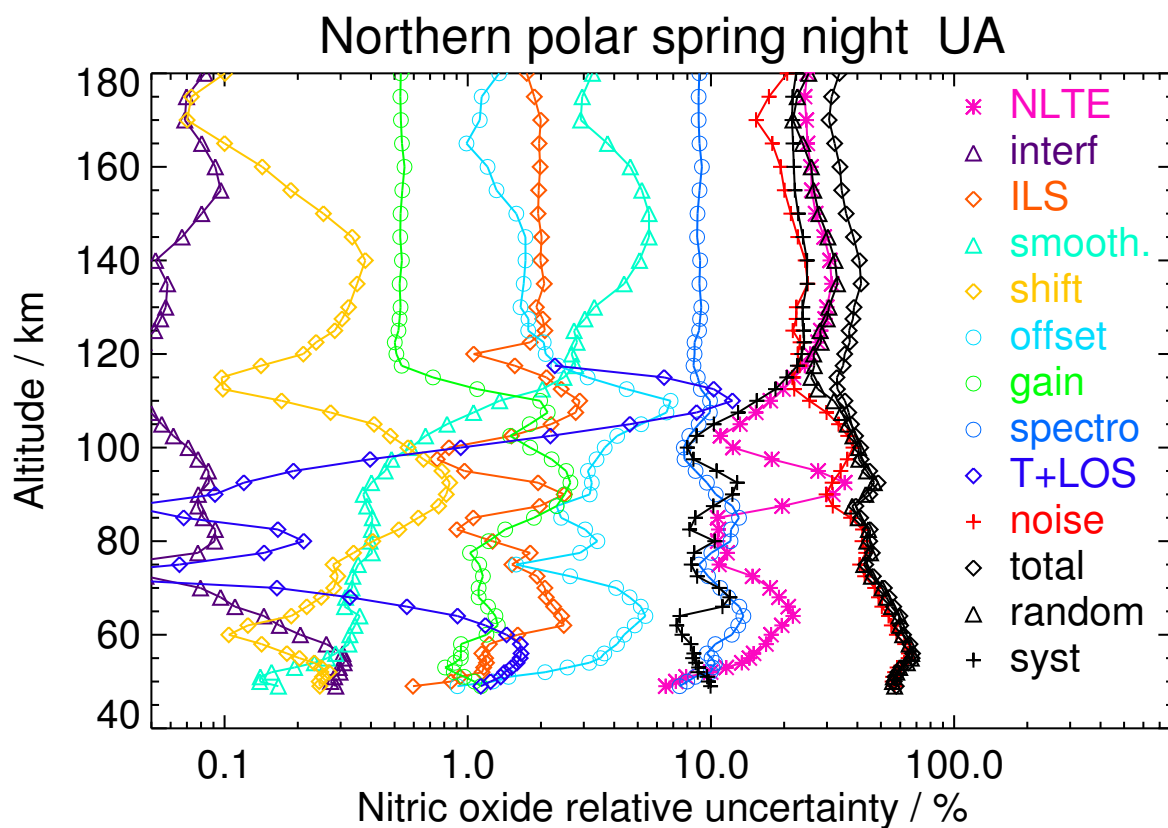

**Figure S140.** V8R\_NOwT\_662 Northern polar spring night, high solar activity

**Table S142.** Nitric oxide error budget for Northern polar summer day, high solar activity. All uncertainties are  $1\sigma$ .

| altitude (km) | mean target (ppmv) | NLTE (%) | interf (%) | ILS (%) | smooth. (%) | shift (%) | offset (%) | gain (%) | spectro (%) | T+LOS (%) | noise (%) | random (%) | syst (%) | total (%) |
|---------------|--------------------|----------|------------|---------|-------------|-----------|------------|----------|-------------|-----------|-----------|------------|----------|-----------|
| 50            | 0.01               | 1.60     | 0.04       | 0.78    | 0.01        | 0.08      | 0.38       | 1.32     | 8.40        | 0.79      | 10.79     | 11.02      | 8.44     | 13.88     |
| 60            | 0.01               | 9.38     | 0.10       | 2.39    | 0.08        | 0.22      | 1.91       | 1.03     | 11.72       | 1.11      | 35.23     | 37.13      | 9.97     | 38.45     |
| 70            | 0.03               | 19.08    | 0.03       | 4.56    | 0.14        | 0.33      | 2.19       | 1.51     | 15.01       | 0.13      | 37.37     | 42.27      | 15.07    | 44.88     |
| 80            | 0.09               | 14.22    | 0.03       | 2.91    | 0.23        | 0.36      | 3.46       | 1.12     | 13.21       | 0.35      | 31.78     | 35.20      | 13.04    | 37.53     |
| 90            | 1.21               | 18.98    | 0.04       | 2.91    | 0.35        | 0.69      | 4.19       | 1.63     | 11.96       | 0.37      | 32.72     | 37.49      | 14.08    | 40.04     |
| 100           | 23.58              | 14.60    | 0.02       | 2.52    | 0.20        | 0.50      | 4.20       | 2.94     | 12.67       | 1.69      | 24.13     | 29.74      | 10.35    | 31.49     |
| 110           | 59.63              | 19.67    | 0.03       | 3.08    | 0.77        | 0.29      | 5.02       | 1.47     | 8.52        | 13.51     | 16.00     | 24.63      | 18.14    | 30.59     |
| 120           | 135.90             | 29.67    | 0.06       | 1.37    | 2.11        | 0.19      | 1.82       | 0.47     | 8.38        | <0.01     | 19.57     | 26.00      | 25.83    | 36.65     |
| 130           | 275.44             | 26.15    | 0.06       | 2.51    | 2.68        | 0.34      | 1.31       | 0.51     | 8.59        | <0.01     | 19.27     | 24.25      | 23.59    | 33.83     |
| 140           | 389.07             | 25.91    | 0.13       | 1.88    | 3.35        | 0.50      | 1.01       | 0.51     | 8.32        | <0.01     | 18.73     | 23.52      | 23.54    | 33.28     |
| 150           | 483.42             | 24.89    | 0.05       | 1.78    | 4.06        | 0.35      | 0.93       | 0.51     | 8.30        | <0.01     | 16.60     | 21.65      | 22.72    | 31.38     |
| 160           | 585.65             | 23.43    | 0.05       | 1.76    | 3.89        | 0.17      | 0.74       | 0.50     | 8.33        | <0.01     | 14.65     | 19.32      | 21.88    | 29.19     |
| 170           | 679.79             | 23.30    | 0.03       | 1.82    | 1.79        | 0.06      | 0.87       | 0.50     | 8.49        | <0.01     | 11.64     | 17.00      | 21.65    | 27.53     |
| 180           | 737.38             | 24.37    | 0.05       | 1.69    | 2.02        | 0.12      | 0.94       | 0.50     | 8.33        | <0.01     | 13.74     | 17.57      | 23.48    | 29.33     |

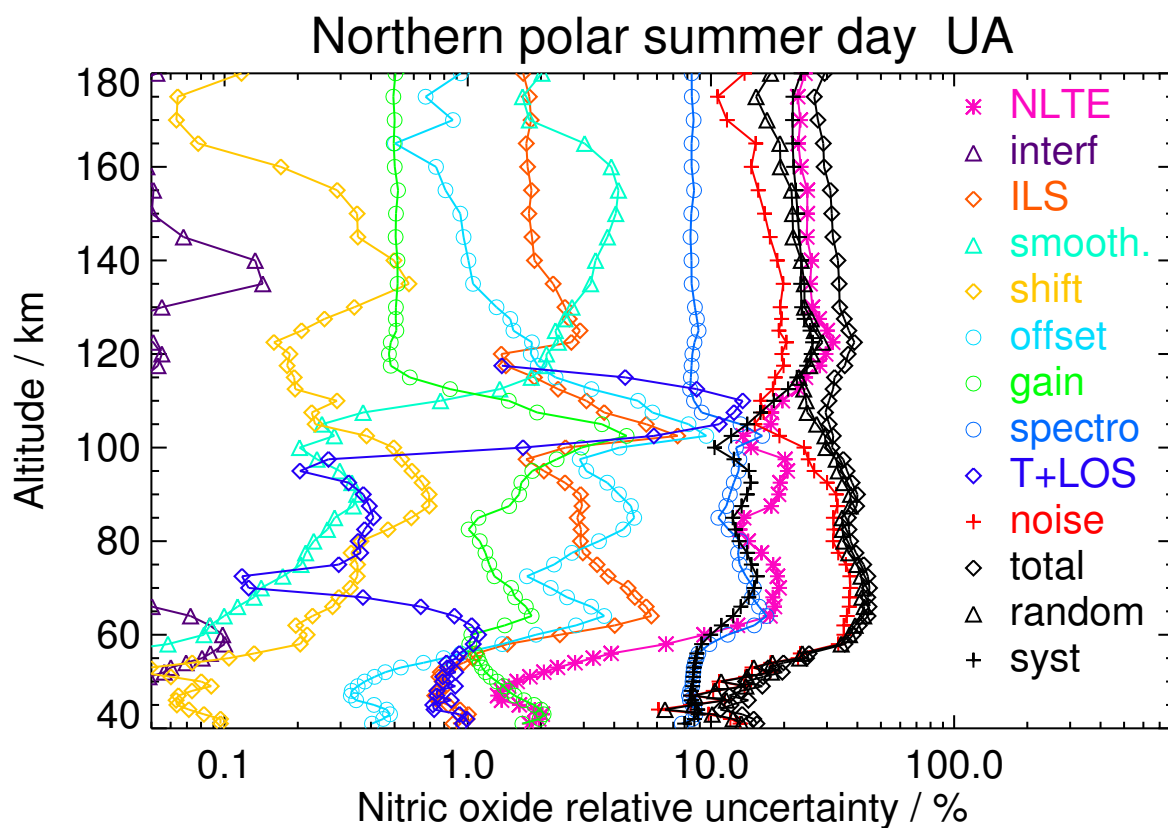

**Figure S141.** V8R\_NOwT\_662 Northern polar summer day, high solar activity

**Table S143.** Nitric oxide error budget for Northern polar summer night, high solar activity. All uncertainties are  $1\sigma$ .

| altitude (km) | mean target (ppmv) | NLTE (%) | interf (%) | ILS (%) | smooth. (%) | shift (%) | offset (%) | gain (%) | spectro (%) | T+LOS (%) | noise (%) | random (%) | syst (%) | total (%) |
|---------------|--------------------|----------|------------|---------|-------------|-----------|------------|----------|-------------|-----------|-----------|------------|----------|-----------|
| 50            | 0.00               | 3.82     | 0.21       | 0.41    | 0.08        | 0.12      | 1.00       | 0.94     | 3.22        | 0.86      | 35.03     | 35.24      | 3.56     | 35.42     |
| 60            | 0.01               | 8.14     | 0.15       | 1.44    | 0.23        | 0.08      | 2.64       | 0.87     | 8.65        | 1.05      | 49.77     | 50.72      | 7.51     | 51.27     |
| 70            | 0.02               | 14.10    | 0.05       | 1.10    | 0.43        | 0.16      | 2.02       | 0.96     | 6.00        | <0.01     | 49.00     | 50.38      | 10.19    | 51.40     |
| 80            | 0.07               | 22.92    | 0.07       | 0.41    | 0.71        | 0.28      | 2.15       | 1.65     | 6.99        | 0.23      | 46.92     | 50.02      | 16.79    | 52.76     |
| 90            | 1.03               | 18.06    | 0.06       | 0.66    | 0.64        | 0.28      | 2.45       | 1.22     | 8.63        | 0.13      | 38.64     | 41.88      | 12.19    | 43.62     |
| 100           | 10.04              | 12.46    | 0.04       | 1.52    | 0.58        | 0.18      | 4.73       | 2.30     | 10.12       | 2.66      | 32.66     | 35.75      | 9.14     | 36.90     |
| 110           | 26.57              | 11.48    | 0.03       | 2.76    | 2.03        | 0.10      | 7.00       | 1.75     | 8.44        | 17.23     | 26.63     | 34.17      | 10.26    | 35.67     |
| 120           | 57.52              | 22.49    | 0.05       | 1.10    | 4.19        | 0.12      | 3.19       | 0.48     | 8.11        | <0.01     | 26.18     | 29.19      | 20.83    | 35.86     |
| 130           | 83.00              | 36.22    | 0.06       | 2.19    | 4.57        | 0.31      | 3.11       | 0.59     | 10.07       | <0.01     | 29.27     | 40.66      | 25.54    | 48.02     |
| 140           | 108.85             | 41.79    | 0.12       | 2.77    | 6.38        | 0.57      | 3.36       | 0.69     | 11.41       | <0.01     | 31.97     | 46.46      | 28.30    | 54.40     |
| 150           | 127.45             | 39.16    | 0.12       | 2.66    | 6.39        | 0.36      | 2.56       | 0.74     | 12.07       | <0.01     | 27.76     | 41.93      | 27.33    | 50.05     |
| 160           | 130.08             | 34.76    | 0.12       | 2.38    | 4.94        | 0.19      | 2.11       | 0.69     | 11.33       | <0.01     | 26.29     | 36.92      | 26.45    | 45.42     |
| 170           | 150.36             | 32.79    | 0.11       | 2.15    | 4.24        | 0.13      | 2.33       | 0.63     | 10.39       | <0.01     | 30.18     | 37.88      | 26.22    | 46.07     |
| 180           | 158.71             | 32.46    | 0.11       | 2.10    | 4.46        | 0.12      | 2.62       | 0.62     | 10.18       | <0.01     | 36.63     | 43.04      | 26.04    | 50.31     |

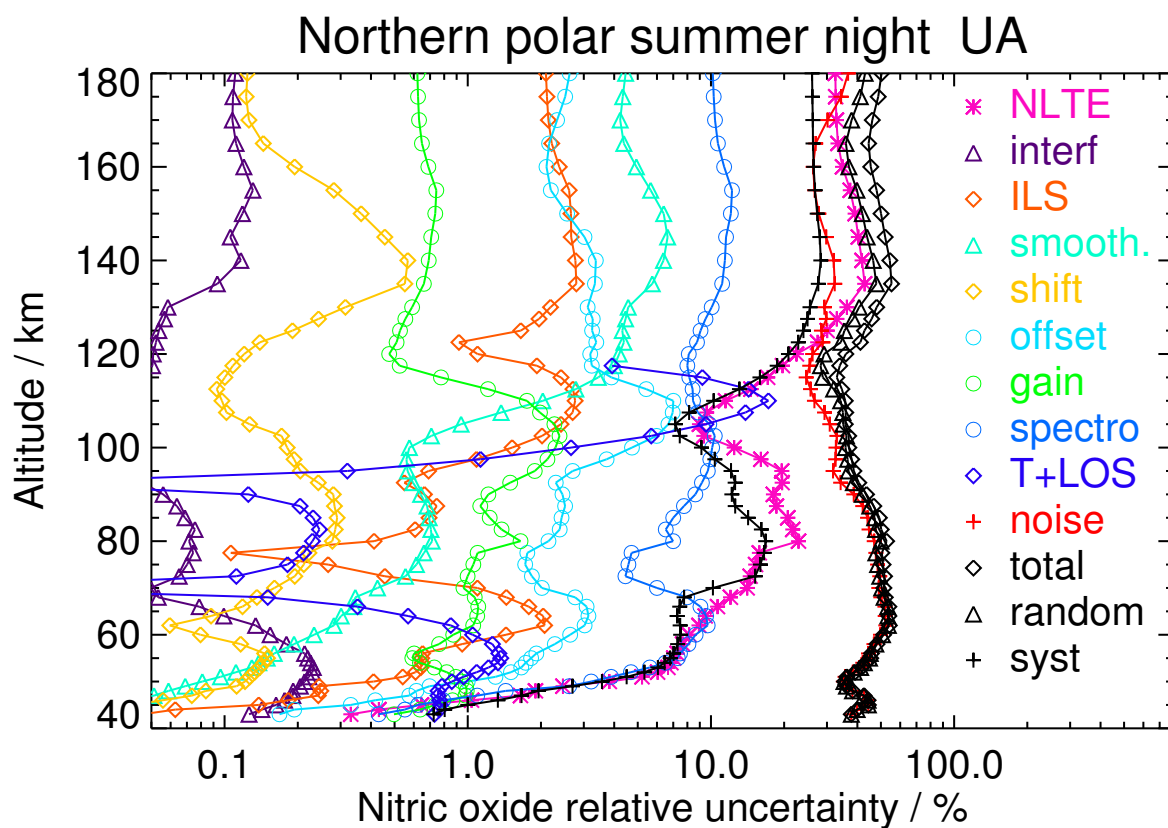

**Figure S142.** V8R\_NOwT\_662 Northern polar summer night, high solar activity

**Table S144.** Nitric oxide error budget for Northern polar autumn day, high solar activity. All uncertainties are  $1\sigma$ .

| altitude (km) | mean target (ppmv) | NLTE (%) | interf (%) | ILS (%) | smooth. (%) | shift (%) | offset (%) | gain (%) | spectro (%) | T+LOS (%) | noise (%) | random (%) | syst (%) | total (%) |
|---------------|--------------------|----------|------------|---------|-------------|-----------|------------|----------|-------------|-----------|-----------|------------|----------|-----------|
| 50            | 0.00               | 8.16     | 0.10       | 1.53    | 0.07        | 0.07      | 1.18       | 1.88     | 11.67       | 0.95      | 37.73     | 38.87      | 11.12    | 40.43     |
| 60            | 0.01               | 23.49    | 0.08       | 3.99    | 0.19        | 0.16      | 3.02       | 1.41     | 17.12       | 0.91      | 52.23     | 56.81      | 19.30    | 60.00     |
| 70            | 0.05               | 15.07    | 0.05       | 4.46    | 0.16        | 0.18      | 2.82       | 0.99     | 12.24       | 0.03      | 40.99     | 42.92      | 15.61    | 45.67     |
| 80            | 0.18               | 18.07    | 0.05       | 3.27    | 0.27        | 0.33      | 3.31       | 1.26     | 15.00       | 0.20      | 39.63     | 44.08      | 14.21    | 46.32     |
| 90            | 1.93               | 21.20    | 0.06       | 2.24    | 0.40        | 0.60      | 2.92       | 1.30     | 12.15       | 0.18      | 34.70     | 39.91      | 14.98    | 42.63     |
| 100           | 14.66              | 18.68    | 0.06       | 2.26    | 0.42        | 0.59      | 2.94       | 1.35     | 13.52       | 0.08      | 30.27     | 34.88      | 15.72    | 38.26     |
| 110           | 76.26              | 21.77    | 0.02       | 0.86    | 0.91        | 0.31      | 5.07       | 1.29     | 10.48       | 7.78      | 22.35     | 29.05      | 18.15    | 34.25     |
| 120           | 205.42             | 29.10    | 0.04       | 0.73    | 2.04        | 0.36      | 1.36       | 0.46     | 7.63        | <0.01     | 19.18     | 22.37      | 27.93    | 35.78     |
| 130           | 311.25             | 24.10    | 0.08       | 1.61    | 2.10        | 0.34      | 0.78       | 0.47     | 7.73        | <0.01     | 15.76     | 17.67      | 24.18    | 29.95     |
| 140           | 343.01             | 26.74    | 0.15       | 1.61    | 2.99        | 0.31      | 0.86       | 0.48     | 7.92        | <0.01     | 16.26     | 19.90      | 25.66    | 32.48     |
| 150           | 401.60             | 24.78    | 0.09       | 1.66    | 3.69        | 0.26      | 0.96       | 0.47     | 7.81        | <0.01     | 15.01     | 17.96      | 24.39    | 30.29     |
| 160           | 465.30             | 23.11    | 0.08       | 1.64    | 3.38        | 0.11      | 0.79       | 0.47     | 7.89        | <0.01     | 13.38     | 16.10      | 23.04    | 28.11     |
| 170           | 583.59             | 23.52    | 0.04       | 1.67    | 1.63        | 0.07      | 1.02       | 0.46     | 8.00        | <0.01     | 11.90     | 15.42      | 22.98    | 27.67     |
| 180           | 629.72             | 24.43    | 0.09       | 1.67    | 1.44        | 0.10      | 0.83       | 0.48     | 8.06        | <0.01     | 11.04     | 13.47      | 24.66    | 28.10     |

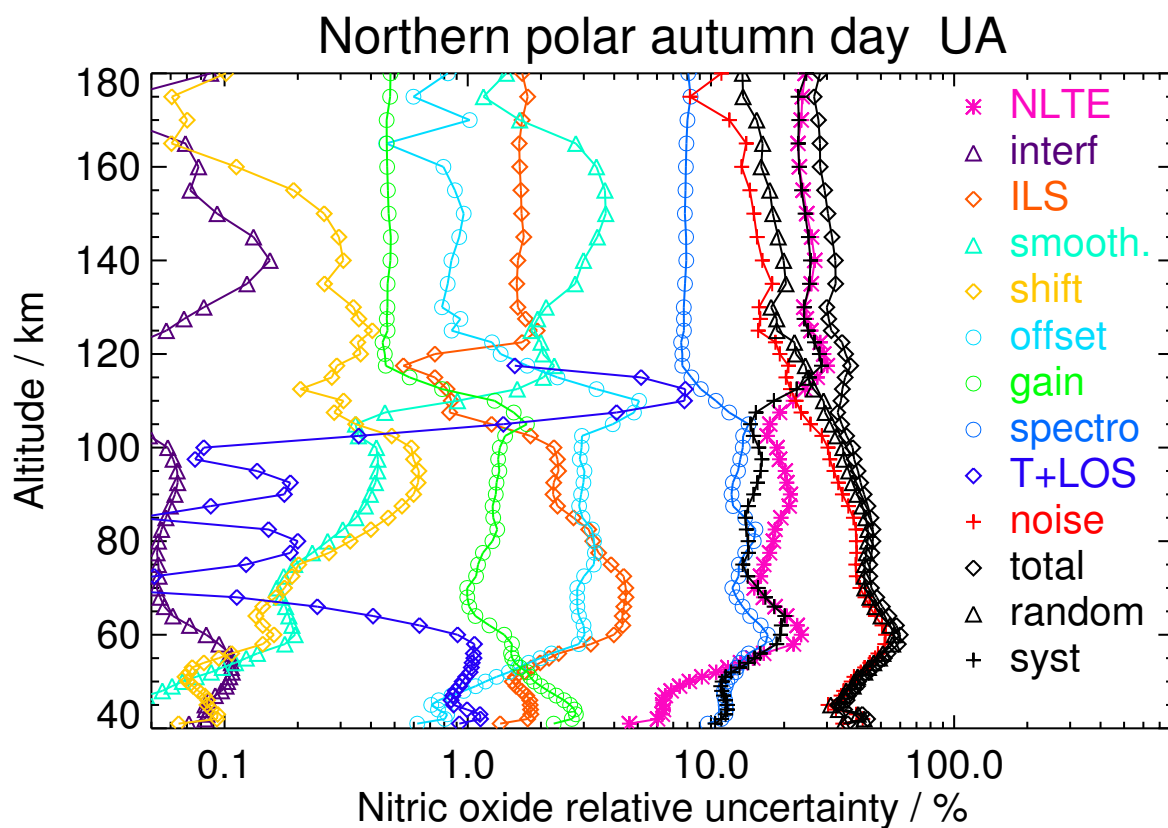

**Figure S143.** V8R\_NOwT\_662 Northern polar autumn day, high solar activity

**Table S145.** Nitric oxide error budget for Northern polar autumn night, high solar activity. All uncertainties are  $1\sigma$ .

| altitude (km) | mean target (ppmv) | NLTE (%) | interf (%) | ILS (%) | smooth. (%) | shift (%) | offset (%) | gain (%) | spectro (%) | T+LOS (%) | noise (%) | random (%) | syst (%) | total (%) |
|---------------|--------------------|----------|------------|---------|-------------|-----------|------------|----------|-------------|-----------|-----------|------------|----------|-----------|
| 50            | 0.00               | 7.17     | 0.15       | 2.01    | 0.11        | 0.34      | 1.52       | 1.43     | 10.92       | 2.12      | 63.66     | 64.55      | 8.34     | 65.09     |
| 60            | 0.02               | 13.40    | 0.07       | 1.77    | 0.11        | 0.19      | 1.95       | 2.37     | 12.92       | 1.58      | 34.97     | 38.69      | 9.38     | 39.81     |
| 70            | 0.12               | 10.47    | 0.05       | 2.94    | 0.21        | 0.16      | 2.19       | 1.72     | 8.88        | 0.53      | 38.92     | 40.83      | 7.27     | 41.47     |
| 80            | 0.77               | 15.92    | 0.06       | 2.23    | 0.30        | 0.35      | 1.76       | 3.05     | 11.19       | 0.05      | 34.48     | 38.67      | 9.47     | 39.81     |
| 90            | 5.15               | 38.55    | 0.08       | 0.98    | 0.31        | 0.33      | 5.73       | 4.21     | 11.26       | 0.78      | 30.53     | 48.26      | 16.39    | 50.97     |
| 100           | 20.33              | 14.75    | 0.13       | 1.61    | 0.51        | 0.57      | 4.69       | 2.37     | 10.71       | 0.70      | 39.50     | 42.71      | 9.97     | 43.86     |
| 110           | 70.50              | 22.56    | 0.12       | 1.26    | 1.56        | 0.22      | 6.38       | 1.79     | 9.22        | 12.83     | 25.92     | 33.86      | 18.22    | 38.45     |
| 120           | 125.82             | 35.00    | 0.07       | 0.97    | 2.73        | 0.28      | 2.01       | 0.62     | 10.16       | <0.01     | 23.64     | 33.84      | 27.48    | 43.59     |
| 130           | 176.14             | 37.84    | 0.10       | 1.93    | 2.86        | 0.45      | 1.21       | 0.60     | 9.85        | <0.01     | 19.95     | 36.09      | 25.26    | 44.05     |
| 140           | 180.84             | 33.60    | 0.06       | 2.07    | 3.97        | 0.24      | 1.23       | 0.58     | 9.96        | <0.01     | 20.31     | 32.00      | 25.26    | 40.77     |
| 150           | 210.70             | 31.58    | 0.13       | 2.02    | 4.64        | 0.21      | 1.32       | 0.58     | 9.84        | <0.01     | 17.82     | 29.29      | 24.11    | 37.94     |
| 160           | 222.68             | 30.21    | 0.15       | 2.19    | 4.83        | 0.21      | 1.19       | 0.61     | 10.11       | <0.01     | 17.07     | 28.06      | 23.43    | 36.56     |
| 170           | 268.06             | 31.31    | 0.14       | 2.47    | 3.28        | 0.19      | 1.04       | 0.64     | 10.76       | <0.01     | 13.51     | 28.05      | 22.58    | 36.01     |
| 180           | 227.29             | 30.88    | 0.18       | 2.30    | 3.83        | 0.15      | 1.22       | 0.64     | 10.76       | <0.01     | 18.88     | 28.89      | 24.75    | 38.04     |

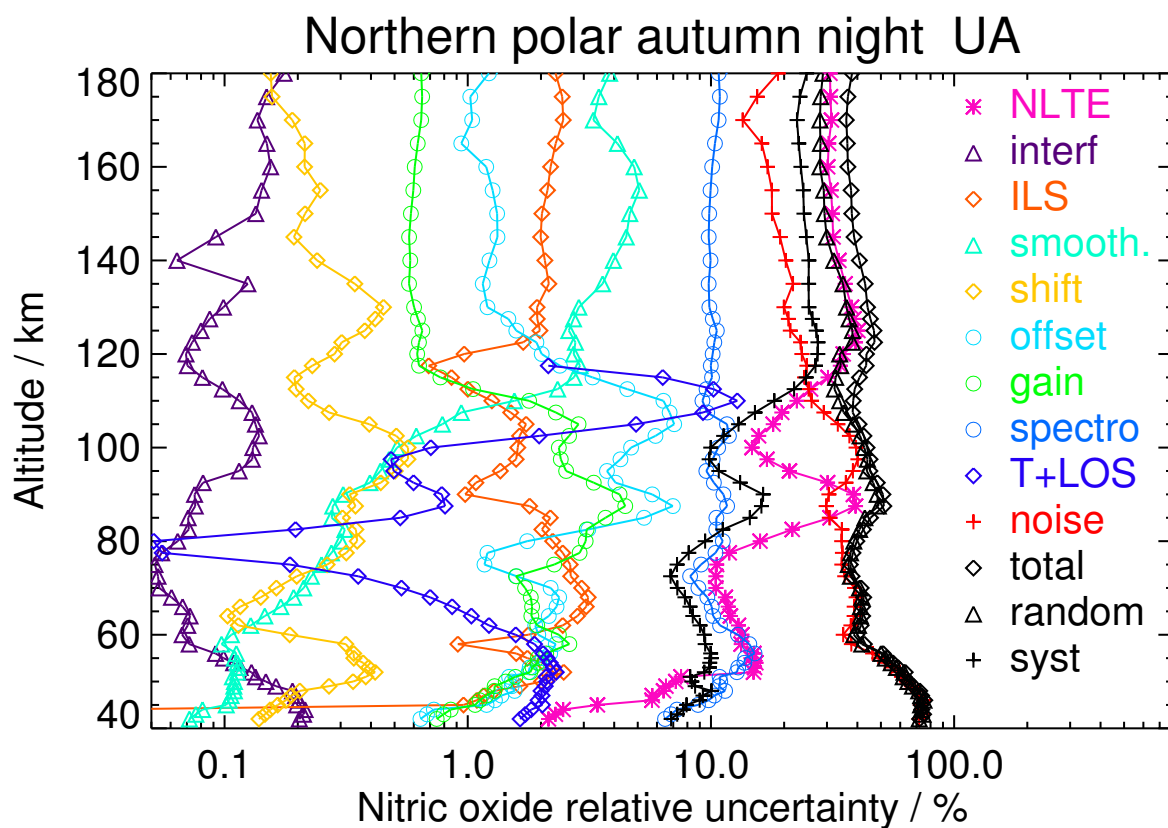

**Figure S144.** V8R\_NOwT\_662 Northern polar autumn night, high solar activity

**Table S146.** Nitric oxide error budget for Northern midlatitude winter day, high solar activity. All uncertainties are  $1\sigma$ .

| altitude (km) | mean target (ppmv) | NLTE (%) | interf (%) | ILS (%) | smooth. (%) | shift (%) | offset (%) | gain (%) | spectro (%) | T+LOS (%) | noise (%) | random (%) | syst (%) | total (%) |
|---------------|--------------------|----------|------------|---------|-------------|-----------|------------|----------|-------------|-----------|-----------|------------|----------|-----------|
| 50            | 0.01               | 11.14    | 0.08       | 0.91    | 0.15        | 0.09      | 1.74       | 2.94     | 11.07       | 1.28      | 45.90     | 47.74      | 9.43     | 48.66     |
| 60            | 0.02               | 14.67    | 0.04       | 1.48    | 0.18        | 0.11      | 1.99       | 1.85     | 13.08       | 0.70      | 47.32     | 50.43      | 9.63     | 51.34     |
| 70            | 0.08               | 13.09    | 0.02       | 2.88    | 0.18        | 0.08      | 2.14       | 1.66     | 14.05       | 0.03      | 36.45     | 40.33      | 9.31     | 41.39     |
| 80            | 0.55               | 13.62    | <0.01      | 1.80    | 0.16        | 0.10      | 4.27       | 2.32     | 13.89       | 0.11      | 25.38     | 30.39      | 11.23    | 32.40     |
| 90            | 3.38               | 29.72    | 0.02       | 0.85    | 0.30        | 0.32      | 5.02       | 2.39     | 12.55       | 0.29      | 30.35     | 40.65      | 18.49    | 44.65     |
| 100           | 10.12              | 19.37    | 0.02       | 0.86    | 0.41        | 0.22      | 3.73       | 2.10     | 10.02       | 0.53      | 30.52     | 34.06      | 16.33    | 37.78     |
| 110           | 38.22              | 12.08    | 0.03       | 1.02    | 1.54        | 0.09      | 4.83       | 1.60     | 10.18       | 8.03      | 28.45     | 32.30      | 10.48    | 33.95     |
| 120           | 88.00              | 29.52    | 0.06       | 1.28    | 3.62        | 0.32      | 2.46       | 0.65     | 10.78       | <0.01     | 26.28     | 36.61      | 18.96    | 41.23     |
| 130           | 128.66             | 30.03    | 0.10       | 2.06    | 4.54        | 0.45      | 2.33       | 0.61     | 9.92        | <0.01     | 27.18     | 34.54      | 24.01    | 42.07     |
| 140           | 155.57             | 29.51    | 0.04       | 1.77    | 5.76        | 0.26      | 2.06       | 0.51     | 8.65        | <0.01     | 26.55     | 31.01      | 27.02    | 41.13     |
| 150           | 209.35             | 26.89    | 0.05       | 1.79    | 5.78        | 0.19      | 1.46       | 0.51     | 8.56        | <0.01     | 20.05     | 25.46      | 24.27    | 35.17     |
| 160           | 242.97             | 23.39    | 0.06       | 1.70    | 5.01        | 0.13      | 1.13       | 0.48     | 8.14        | <0.01     | 18.38     | 21.96      | 22.33    | 31.32     |
| 170           | 311.30             | 22.99    | 0.05       | 1.74    | 3.01        | 0.08      | 0.94       | 0.49     | 8.34        | <0.01     | 12.21     | 16.47      | 22.12    | 27.57     |
| 180           | 310.27             | 20.47    | 0.06       | 1.58    | 3.79        | 0.12      | 1.30       | 0.44     | 7.37        | <0.01     | 18.42     | 20.68      | 20.09    | 28.84     |

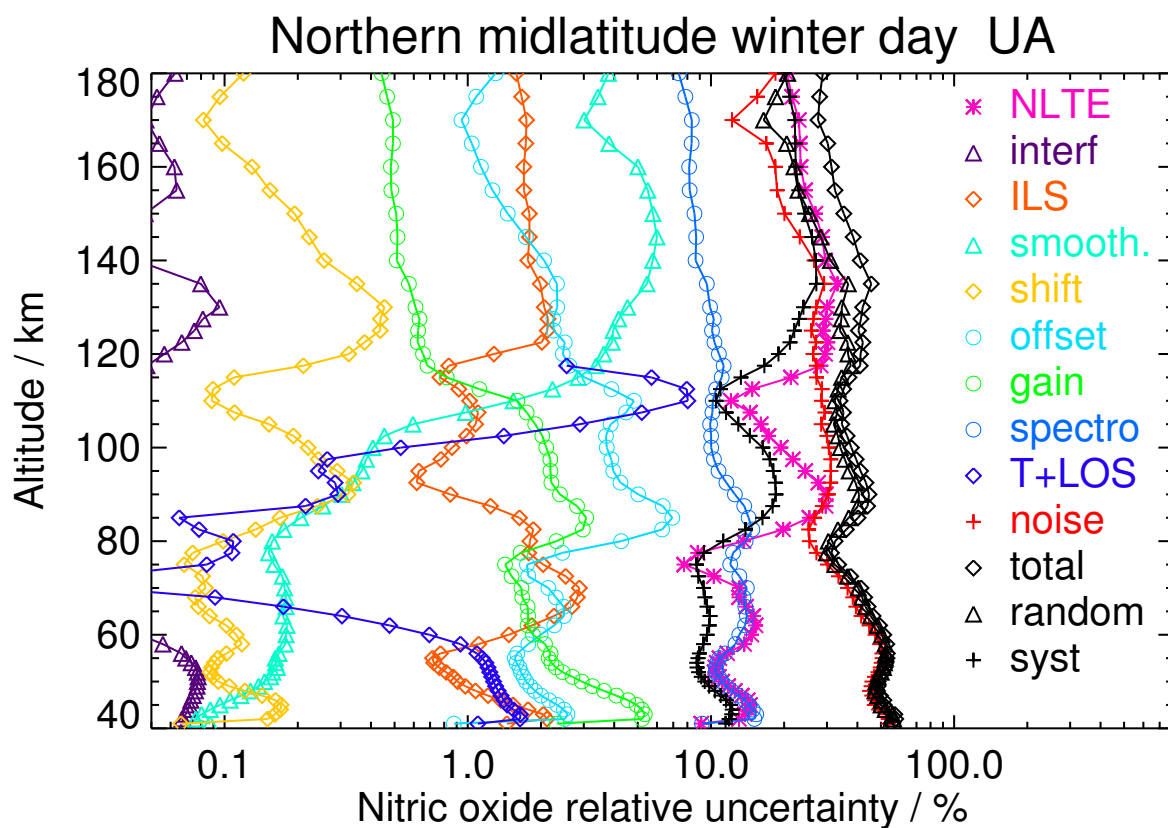

**Figure S145.** V8R\_NOwT\_662 Northern midlatitude winter day, high solar activity

**Table S147.** Nitric oxide error budget for Northern midlatitude winter night, high solar activity. All uncertainties are  $1\sigma$ .

| altitude (km) | mean target (ppmv) | NLTE (%) | interf (%) | ILS (%) | smooth. (%) | shift (%) | offset (%) | gain (%) | spectro (%) | T+LOS (%) | noise (%) | random (%) | syst (%) | total (%) |
|---------------|--------------------|----------|------------|---------|-------------|-----------|------------|----------|-------------|-----------|-----------|------------|----------|-----------|
| 50            | 0.00               | 3.29     | 0.11       | 2.15    | 0.18        | 0.17      | 1.12       | 1.44     | 11.12       | 2.21      | 51.71     | 52.28      | 9.42     | 53.12     |
| 60            | 0.02               | 8.81     | 0.09       | 0.99    | 0.41        | 0.20      | 2.63       | 1.23     | 8.56        | 1.14      | 55.98     | 56.90      | 7.65     | 57.41     |
| 70            | 0.07               | 9.90     | 0.04       | 2.81    | 0.41        | 0.18      | 2.64       | 1.03     | 8.33        | 0.20      | 45.46     | 46.74      | 8.09     | 47.43     |
| 80            | 0.26               | 12.18    | 0.03       | 2.21    | 0.57        | 0.28      | 3.89       | 1.89     | 8.66        | 0.13      | 43.98     | 45.92      | 8.53     | 46.70     |
| 90            | 1.75               | 27.64    | 0.03       | 1.95    | 0.98        | 0.68      | 5.54       | 1.26     | 5.94        | 0.42      | 46.42     | 53.24      | 12.57    | 54.70     |
| 100           | 6.66               | 23.55    | 0.04       | 1.57    | 1.10        | 0.73      | 4.71       | 1.91     | 5.38        | 1.56      | 42.17     | 47.76      | 10.66    | 48.93     |
| 110           | 23.13              | 17.50    | 0.03       | 1.59    | 2.62        | 0.48      | 6.35       | 1.52     | 7.50        | 12.61     | 36.52     | 42.51      | 9.98     | 43.67     |
| 120           | 85.60              | 59.31    | 0.03       | 0.62    | 3.34        | 0.90      | 2.41       | 0.74     | 11.69       | <0.01     | 23.41     | 61.25      | 21.66    | 64.97     |
| 130           | 107.25             | 39.25    | 0.03       | 2.86    | 3.77        | 0.44      | 1.97       | 0.82     | 13.59       | <0.01     | 22.98     | 42.21      | 22.33    | 47.75     |
| 140           | 100.42             | 39.46    | 0.04       | 2.51    | 5.11        | 0.45      | 2.15       | 0.72     | 12.24       | <0.01     | 25.61     | 43.00      | 23.50    | 49.00     |
| 150           | 101.82             | 26.21    | 0.07       | 1.95    | 5.54        | 0.23      | 2.03       | 0.54     | 8.95        | <0.01     | 24.55     | 30.65      | 21.66    | 37.53     |
| 160           | 104.07             | 24.24    | 0.08       | 1.82    | 4.83        | 0.11      | 1.66       | 0.52     | 8.79        | <0.01     | 23.05     | 27.96      | 21.08    | 35.01     |
| 170           | 104.04             | 22.50    | 0.07       | 1.75    | 4.09        | 0.10      | 1.80       | 0.50     | 8.41        | <0.01     | 24.08     | 27.28      | 20.89    | 34.36     |
| 180           | 106.74             | 23.46    | 0.08       | 1.77    | 4.43        | 0.08      | 2.08       | 0.50     | 8.41        | <0.01     | 30.49     | 33.70      | 21.03    | 39.73     |

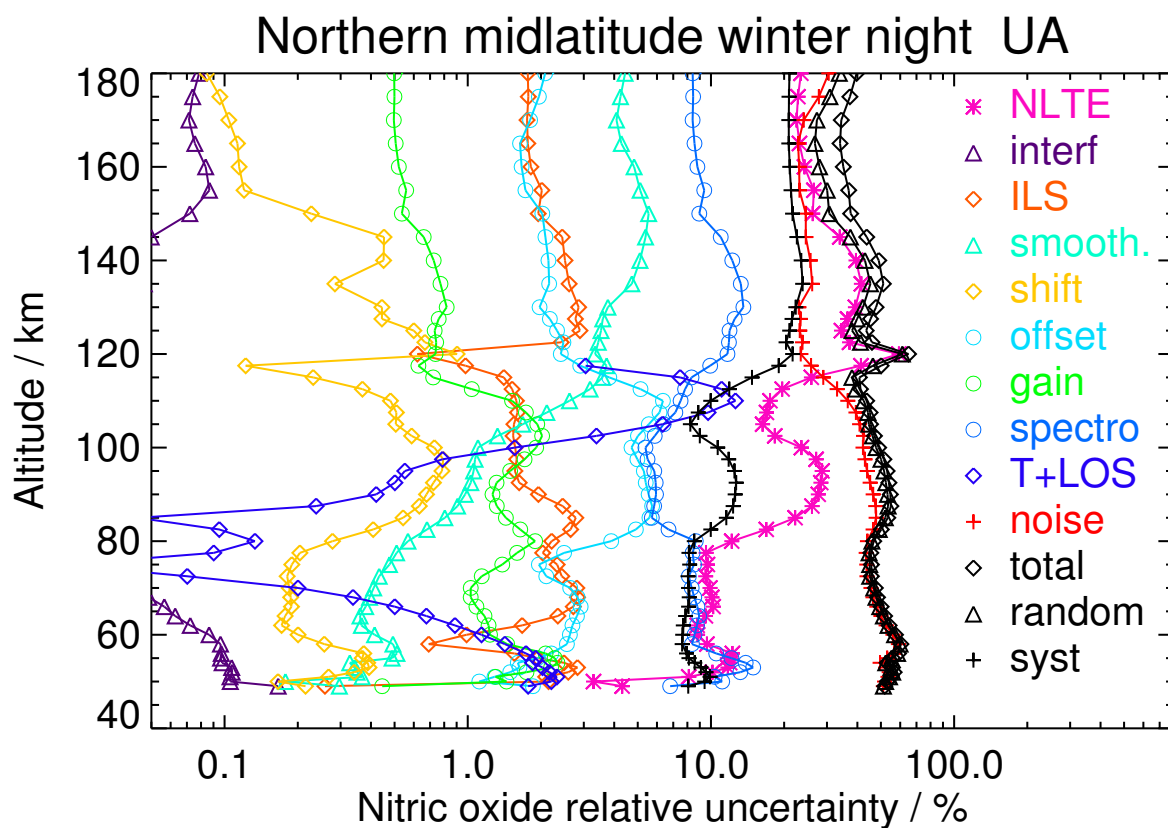

**Figure S146.** V8R\_NOwT\_662 Northern midlatitude winter night, high solar activity

**Table S148.** Nitric oxide error budget for Northern midlatitude spring day, high solar activity. All uncertainties are  $1\sigma$ .

| altitude (km) | mean target (ppmv) | NLTE (%) | interf (%) | ILS (%) | smooth. (%) | shift (%) | offset (%) | gain (%) | spectro (%) | T+LOS (%) | noise (%) | random (%) | syst (%) | total (%) |
|---------------|--------------------|----------|------------|---------|-------------|-----------|------------|----------|-------------|-----------|-----------|------------|----------|-----------|
| 50            | 0.01               | 2.58     | 0.09       | 1.25    | 0.05        | 0.08      | 0.39       | 1.34     | 8.99        | 0.68      | 23.92     | 24.21      | 8.82     | 25.77     |
| 60            | 0.01               | 13.16    | 0.11       | 2.80    | 0.32        | 0.37      | 2.03       | 1.19     | 13.94       | 1.05      | 51.73     | 54.43      | 9.73     | 55.30     |
| 70            | 0.02               | 6.93     | 0.06       | 2.02    | 0.35        | 0.25      | 0.84       | 0.72     | 6.85        | 0.05      | 44.60     | 44.61      | 9.97     | 45.71     |
| 80            | 0.06               | 20.25    | 0.09       | 2.35    | 0.54        | 0.67      | 2.16       | 0.87     | 11.75       | 0.27      | 47.98     | 51.01      | 16.12    | 53.50     |
| 90            | 0.91               | 29.89    | 0.10       | 2.22    | 0.63        | 1.33      | 3.40       | 1.21     | 18.13       | 0.03      | 43.84     | 52.72      | 19.61    | 56.25     |
| 100           | 7.74               | 24.32    | 0.07       | 0.97    | 0.51        | 0.78      | 3.25       | 1.28     | 13.89       | 0.06      | 35.86     | 41.10      | 19.87    | 45.65     |
| 110           | 50.05              | 18.61    | 0.02       | 2.46    | 1.00        | 0.29      | 5.78       | 1.57     | 9.99        | 8.74      | 23.61     | 29.53      | 15.83    | 33.51     |
| 120           | 119.12             | 32.83    | 0.03       | 0.64    | 2.66        | 0.38      | 2.08       | 0.49     | 8.30        | <0.01     | 24.47     | 29.19      | 30.10    | 41.93     |
| 130           | 220.24             | 30.66    | 0.03       | 1.90    | 3.01        | 0.30      | 1.72       | 0.49     | 8.62        | <0.01     | 23.20     | 29.55      | 26.37    | 39.60     |
| 140           | 300.25             | 27.65    | 0.09       | 1.68    | 3.26        | 0.27      | 0.96       | 0.50     | 8.37        | <0.01     | 18.21     | 23.74      | 24.85    | 34.37     |
| 150           | 405.48             | 25.21    | 0.06       | 1.70    | 3.72        | 0.27      | 0.67       | 0.48     | 8.01        | <0.01     | 14.35     | 19.81      | 23.04    | 30.39     |
| 160           | 450.01             | 21.65    | 0.03       | 1.57    | 3.74        | 0.10      | 0.51       | 0.45     | 7.66        | <0.01     | 12.46     | 15.69      | 21.30    | 26.45     |
| 170           | 558.18             | 23.76    | 0.03       | 1.65    | 1.85        | 0.09      | 0.89       | 0.46     | 7.97        | <0.01     | 9.61      | 15.07      | 22.37    | 26.97     |
| 180           | 574.42             | 24.13    | 0.06       | 1.67    | 2.35        | 0.17      | 0.95       | 0.46     | 7.60        | <0.01     | 11.38     | 16.15      | 22.76    | 27.91     |

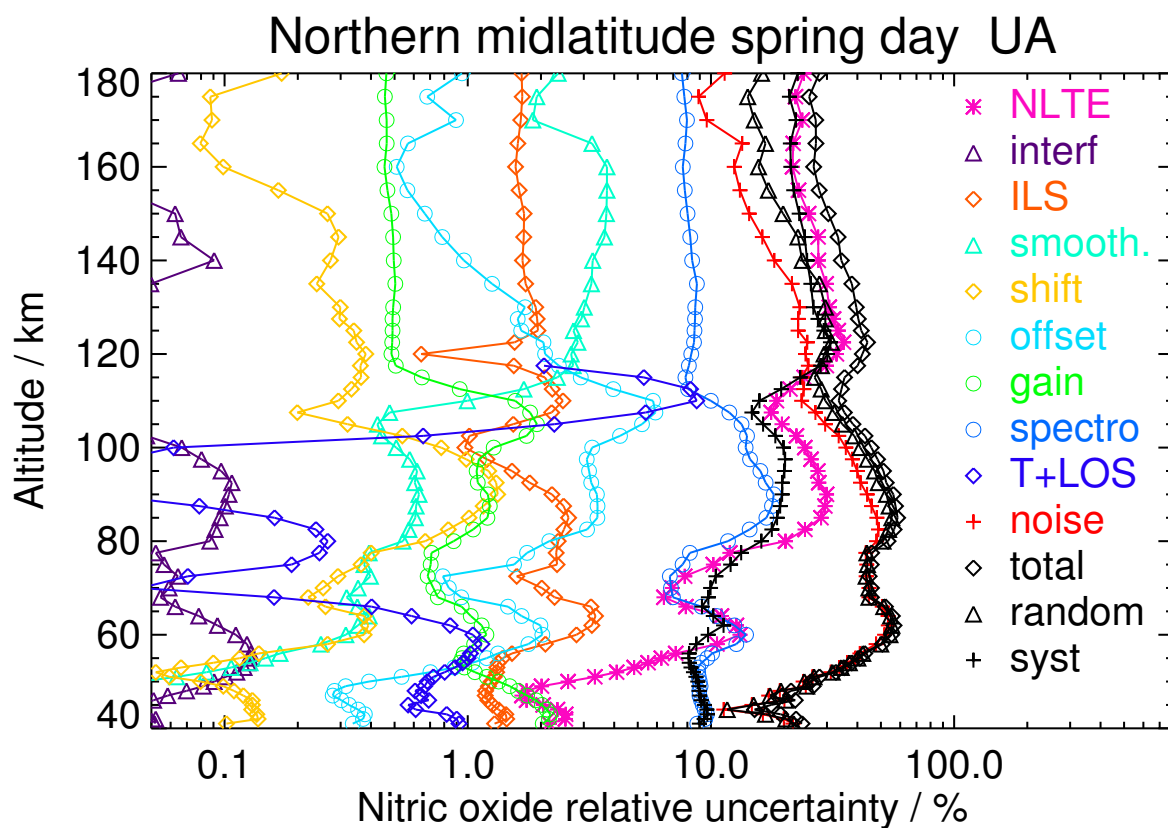

**Figure S147.** V8R\_NOwT\_662 Northern midlatitude spring day, high solar activity



**Table S149.** Nitric oxide error budget for Northern midlatitude spring night, high solar activity. All uncertainties are  $1\sigma$ .

| altitude (km) | mean target (ppmv) | NLTE (%) | interf (%) | ILS (%) | smooth. (%) | shift (%) | offset (%) | gain (%) | spectro (%) | T+LOS (%) | noise (%) | random (%) | syst (%) | total (%) |
|---------------|--------------------|----------|------------|---------|-------------|-----------|------------|----------|-------------|-----------|-----------|------------|----------|-----------|
| 60            | 0.01               | 10.84    | 0.19       | 2.16    | 0.30        | 0.11      | 3.41       | 0.83     | 10.44       | 1.31      | 52.43     | 54.25      | 7.20     | 54.72     |
| 70            | 0.03               | 8.94     | 0.04       | 3.24    | 0.37        | 0.32      | 1.85       | 1.36     | 8.24        | 0.17      | 42.55     | 43.72      | 7.97     | 44.44     |
| 80            | 0.07               | 14.48    | 0.18       | 2.02    | 0.62        | 0.41      | 4.00       | 1.00     | 6.26        | 0.19      | 44.53     | 45.79      | 12.54    | 47.47     |
| 90            | 0.87               | 25.06    | 0.17       | 2.50    | 0.72        | 0.55      | 3.41       | 2.87     | 7.95        | 0.13      | 41.17     | 46.93      | 14.50    | 49.12     |
| 100           | 7.42               | 18.72    | 0.09       | 2.07    | 0.68        | 0.39      | 3.53       | 2.97     | 7.88        | 0.92      | 37.03     | 40.88      | 11.82    | 42.56     |
| 110           | 45.86              | 12.95    | 0.05       | 1.97    | 1.63        | 0.17      | 5.02       | 1.57     | 7.92        | 10.55     | 26.36     | 30.51      | 11.81    | 32.72     |
| 120           | 92.66              | 25.03    | 0.05       | 0.75    | 3.47        | 0.22      | 2.61       | 0.51     | 8.67        | <0.01     | 24.76     | 29.77      | 21.17    | 36.53     |
| 130           | 113.54             | 29.57    | 0.07       | 2.30    | 4.05        | 0.43      | 2.15       | 0.57     | 9.70        | <0.01     | 24.73     | 32.61      | 23.32    | 40.09     |
| 140           | 110.01             | 28.71    | 0.05       | 2.08    | 5.60        | 0.32      | 2.28       | 0.54     | 9.05        | <0.01     | 26.45     | 32.48      | 24.33    | 40.58     |
| 150           | 132.30             | 27.39    | 0.11       | 2.22    | 5.82        | 0.27      | 1.98       | 0.57     | 9.44        | <0.01     | 23.28     | 30.03      | 22.86    | 37.74     |
| 160           | 154.99             | 25.80    | 0.12       | 2.06    | 4.99        | 0.20      | 1.50       | 0.56     | 9.36        | <0.01     | 20.64     | 27.09      | 21.84    | 34.80     |
| 170           | 160.76             | 24.36    | 0.12       | 1.95    | 3.86        | 0.12      | 1.44       | 0.54     | 9.02        | <0.01     | 19.24     | 24.61      | 21.46    | 32.65     |
| 180           | 168.48             | 24.69    | 0.14       | 1.91    | 4.28        | 0.12      | 1.69       | 0.53     | 8.91        | <0.01     | 25.48     | 29.88      | 21.69    | 36.92     |

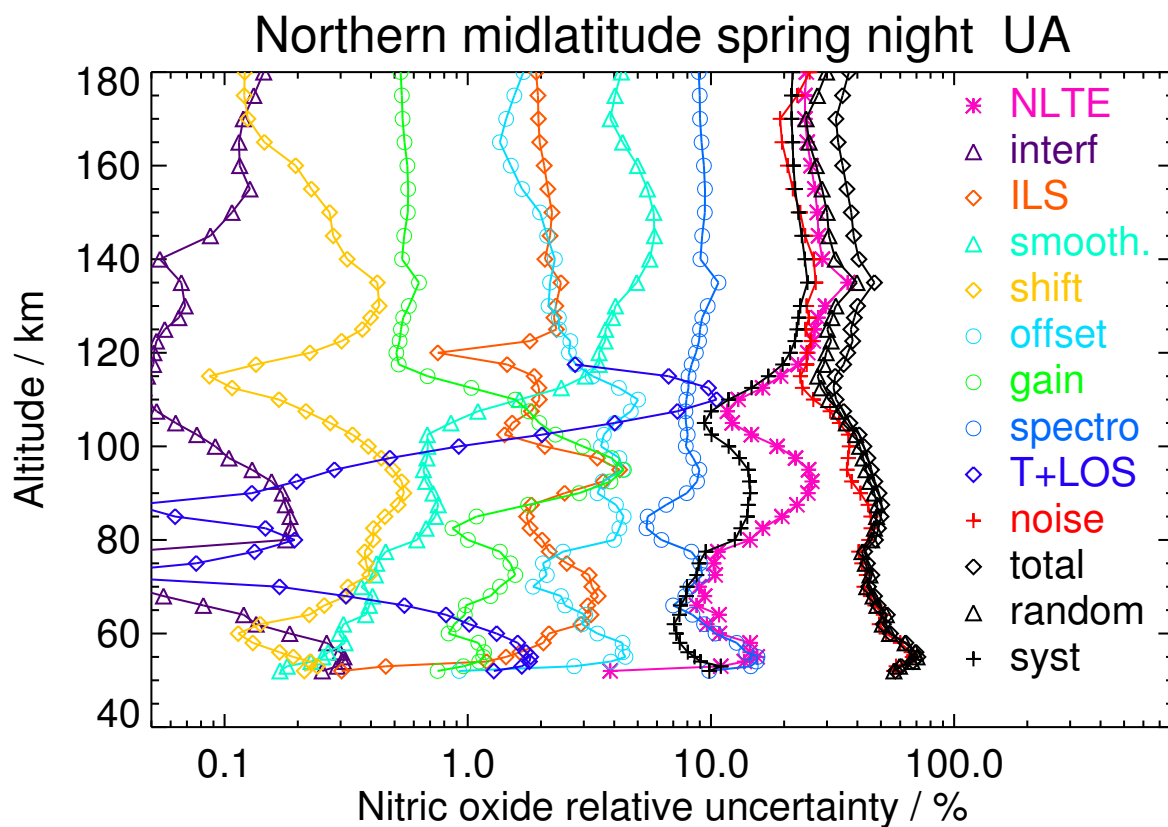

**Figure S148.** V8R\_NOwT\_662 Northern midlatitude spring night, high solar activity

**Table S150.** Nitric oxide error budget for Northern midlatitude summer day, high solar activity. All uncertainties are  $1\sigma$ .

| altitude (km) | mean target (ppmv) | NLTE (%) | interf (%) | ILS (%) | smooth. (%) | shift (%) | offset (%) | gain (%) | spectro (%) | T+LOS (%) | noise (%) | random (%) | syst (%) | total (%) |
|---------------|--------------------|----------|------------|---------|-------------|-----------|------------|----------|-------------|-----------|-----------|------------|----------|-----------|
| 50            | 0.01               | 1.53     | 0.06       | 0.73    | 0.02        | 0.06      | 0.33       | 1.35     | 8.61        | 0.73      | 18.49     | 18.68      | 8.51     | 20.52     |
| 60            | 0.01               | 11.26    | 0.10       | 2.19    | 0.22        | 0.14      | 1.82       | 0.97     | 10.33       | 0.74      | 55.76     | 57.27      | 8.53     | 57.90     |
| 70            | 0.01               | 21.33    | 0.06       | 1.70    | 0.39        | 0.41      | 1.21       | 0.92     | 10.55       | 0.08      | 59.03     | 62.60      | 11.71    | 63.69     |
| 80            | 0.02               | 14.48    | 0.05       | 1.06    | 0.52        | 0.46      | 1.89       | 1.01     | 10.43       | 0.29      | 55.43     | 56.59      | 13.96    | 58.28     |
| 90            | 0.86               | 20.02    | 0.05       | 0.82    | 0.58        | 0.61      | 2.69       | 1.29     | 11.16       | 0.25      | 47.94     | 51.35      | 14.03    | 53.23     |
| 100           | 9.80               | 16.45    | 0.02       | 1.02    | 0.35        | 0.37      | 4.80       | 2.36     | 12.10       | 1.97      | 35.07     | 39.10      | 12.32    | 41.00     |
| 110           | 32.51              | 12.56    | 0.02       | 2.84    | 1.46        | 0.15      | 6.74       | 1.68     | 8.66        | 15.24     | 24.50     | 31.44      | 11.63    | 33.52     |
| 120           | 106.73             | 31.71    | 0.04       | 0.78    | 3.25        | 0.21      | 2.63       | 0.51     | 8.96        | <0.01     | 26.03     | 33.26      | 25.98    | 42.21     |
| 130           | 281.18             | 33.44    | 0.08       | 1.93    | 3.75        | 0.35      | 2.29       | 0.51     | 8.71        | <0.01     | 26.41     | 31.88      | 29.98    | 43.76     |
| 140           | 398.19             | 30.55    | 0.13       | 1.82    | 3.99        | 0.35      | 1.33       | 0.48     | 7.96        | <0.01     | 21.35     | 24.96      | 29.17    | 38.39     |
| 150           | 487.70             | 28.62    | 0.04       | 1.70    | 4.00        | 0.25      | 0.86       | 0.47     | 7.86        | <0.01     | 17.05     | 20.89      | 27.48    | 34.52     |
| 160           | 522.99             | 27.54    | 0.05       | 1.67    | 3.54        | 0.12      | 0.60       | 0.47     | 7.97        | <0.01     | 16.05     | 19.64      | 26.65    | 33.10     |
| 170           | 602.84             | 27.09    | 0.04       | 1.65    | 1.62        | 0.03      | 0.62       | 0.47     | 8.09        | <0.01     | 9.96      | 13.62      | 26.81    | 30.07     |
| 180           | 612.55             | 27.13    | 0.06       | 1.61    | 1.94        | 0.10      | 1.03       | 0.48     | 7.95        | <0.01     | 15.67     | 18.96      | 26.32    | 32.44     |

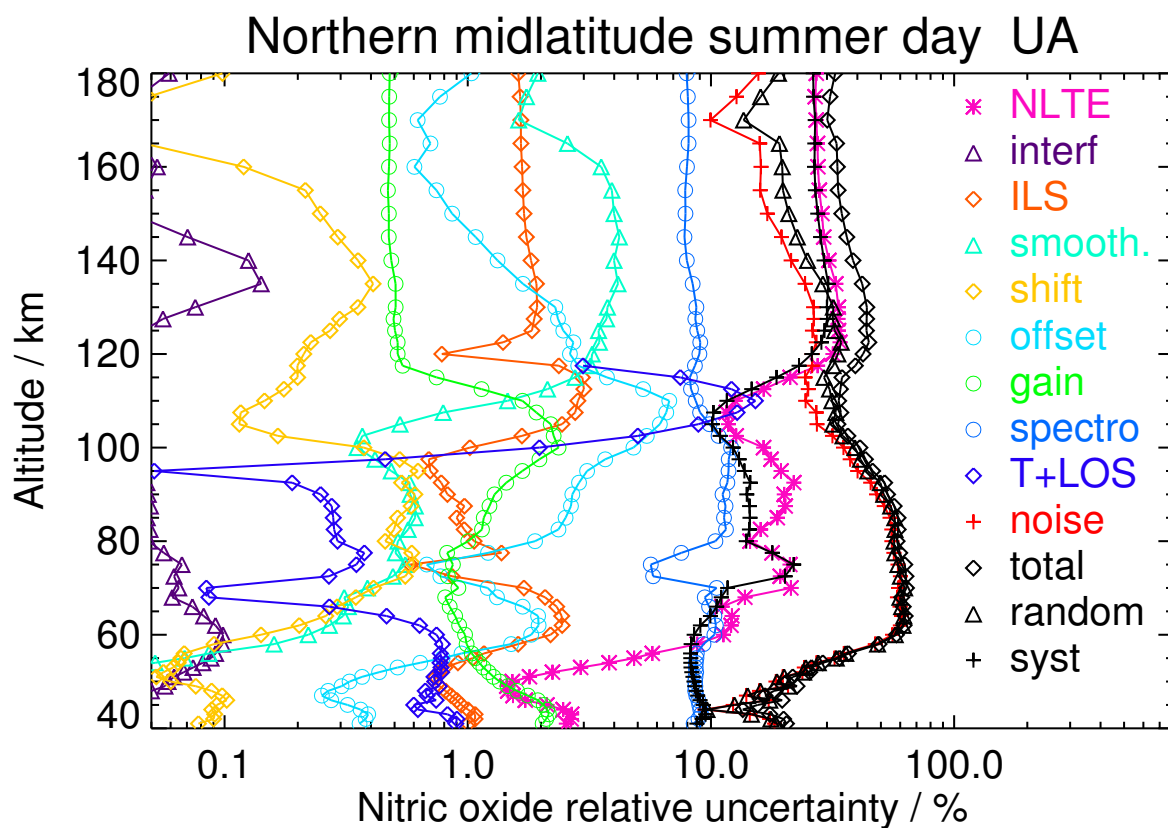

**Figure S149.** V8R\_NOwT\_662 Northern midlatitude summer day, high solar activity

**Table S151.** Nitric oxide error budget for Northern midlatitude summer night, high solar activity. All uncertainties are  $1\sigma$ .

| altitude (km) | mean target (ppmv) | NLTE (%) | interf (%) | ILS (%) | smooth. (%) | shift (%) | offset (%) | gain (%) | spectro (%) | T+LOS (%) | noise (%) | random (%) | syst (%) | total (%) |
|---------------|--------------------|----------|------------|---------|-------------|-----------|------------|----------|-------------|-----------|-----------|------------|----------|-----------|
| 50            | 0.00               | 8.82     | 0.36       | 0.38    | 0.16        | 0.21      | 1.68       | 1.51     | 7.89        | 1.04      | 54.51     | 54.99      | 9.75     | 55.84     |
| 60            | 0.00               | 7.69     | 0.32       | 2.22    | 0.43        | 0.11      | 4.23       | 1.01     | 7.82        | 1.33      | 79.92     | 80.49      | 7.37     | 80.83     |
| 70            | 0.01               | 4.99     | 0.12       | 4.96    | 0.45        | 0.12      | 6.32       | 2.12     | 6.77        | 0.01      | 60.81     | 61.51      | 7.41     | 61.95     |
| 80            | 0.04               | 9.63     | 0.06       | 3.62    | 0.59        | 0.19      | 5.45       | 1.36     | 6.43        | 0.25      | 51.37     | 52.10      | 10.20    | 53.09     |
| 90            | 0.76               | 17.83    | 0.06       | 2.31    | 0.76        | 0.24      | 3.77       | 1.11     | 8.35        | 0.15      | 46.67     | 49.46      | 11.89    | 50.87     |
| 100           | 7.87               | 13.50    | 0.05       | 1.88    | 0.68        | 0.15      | 4.84       | 1.84     | 8.44        | 3.54      | 39.05     | 41.95      | 7.86     | 42.68     |
| 110           | 25.61              | 10.01    | 0.03       | 3.08    | 2.11        | 0.09      | 7.15       | 1.77     | 8.15        | 18.26     | 27.37     | 34.80      | 10.32    | 36.30     |
| 120           | 65.12              | 19.37    | 0.03       | 1.10    | 4.26        | 0.09      | 3.95       | 0.47     | 8.00        | <0.01     | 27.60     | 29.24      | 19.53    | 35.16     |
| 130           | 87.72              | 27.99    | 0.02       | 2.18    | 5.22        | 0.22      | 4.60       | 0.55     | 9.31        | <0.01     | 34.25     | 38.85      | 24.23    | 45.79     |
| 140           | 86.82              | 29.75    | 0.03       | 2.18    | 7.22        | 0.28      | 4.13       | 0.53     | 8.77        | <0.01     | 35.50     | 39.99      | 26.39    | 47.92     |
| 150           | 95.23              | 28.80    | 0.03       | 1.93    | 6.94        | 0.18      | 2.76       | 0.52     | 8.63        | <0.01     | 32.48     | 36.35      | 26.40    | 44.93     |
| 160           | 104.80             | 30.33    | 0.02       | 1.92    | 6.03        | 0.12      | 2.63       | 0.56     | 9.22        | <0.01     | 33.21     | 37.86      | 26.86    | 46.42     |
| 170           | 119.80             | 33.76    | 0.02       | 2.09    | 5.93        | 0.11      | 3.10       | 0.62     | 10.28       | <0.01     | 40.64     | 47.07      | 27.04    | 54.28     |
| 180           | 128.49             | 34.79    | 0.02       | 2.14    | 6.09        | 0.12      | 3.31       | 0.64     | 10.62       | <0.01     | 45.52     | 52.15      | 26.99    | 58.72     |

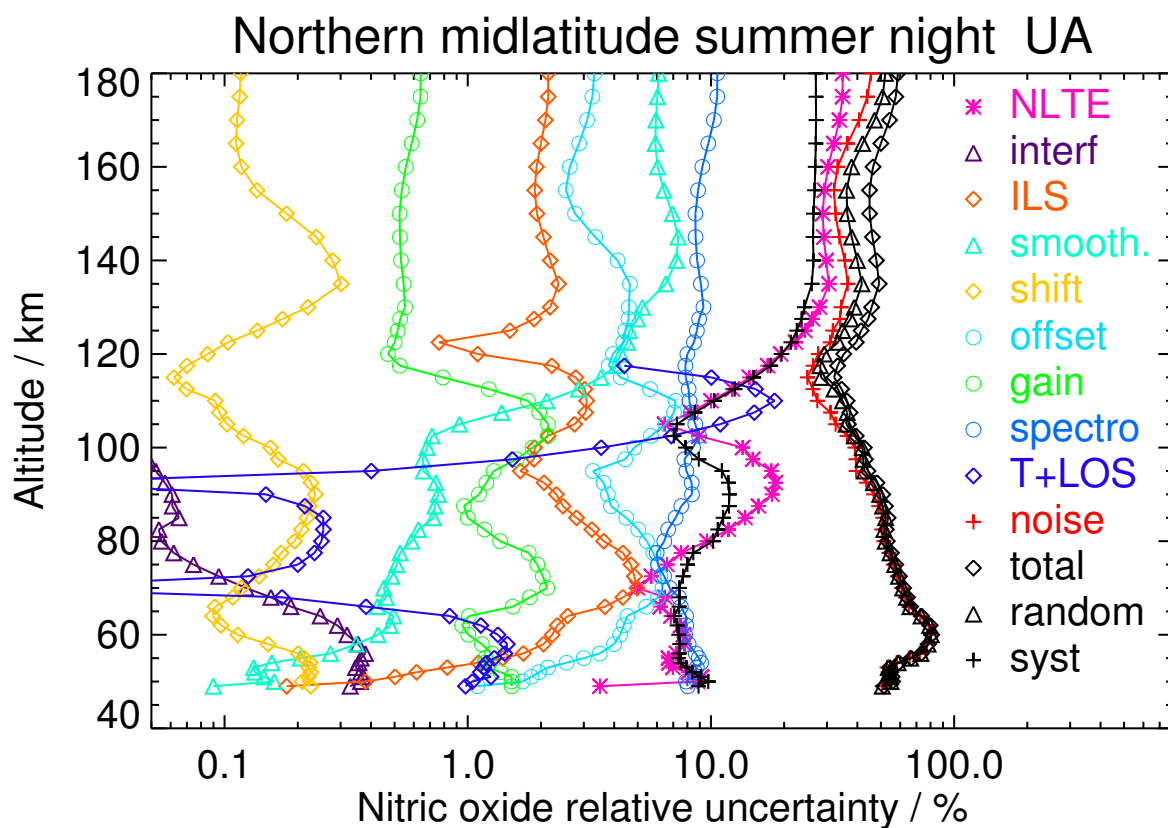

**Figure S150.** V8R\_NOwT\_662 Northern midlatitude summer night, high solar activity

**Table S152.** Nitric oxide error budget for Northern midlatitude autumn day, high solar activity. All uncertainties are  $1\sigma$ .

| altitude (km) | mean target (ppmv) | NLTE (%) | interf (%) | ILS (%) | smooth. (%) | shift (%) | offset (%) | gain (%) | spectro (%) | T+LOS (%) | noise (%) | random (%) | syst (%) | total (%) |
|---------------|--------------------|----------|------------|---------|-------------|-----------|------------|----------|-------------|-----------|-----------|------------|----------|-----------|
| 50            | 0.01               | 4.16     | 0.07       | 1.16    | 0.09        | 0.07      | 0.76       | 1.72     | 9.41        | 0.90      | 31.49     | 32.06      | 8.69     | 33.21     |
| 60            | 0.01               | 11.40    | 0.07       | 2.17    | 0.25        | 0.10      | 2.20       | 1.17     | 10.25       | 0.75      | 54.03     | 55.75      | 7.58     | 56.26     |
| 70            | 0.03               | 12.71    | 0.04       | 2.65    | 0.32        | 0.13      | 1.95       | 1.01     | 10.70       | 0.03      | 48.53     | 50.73      | 8.32     | 51.41     |
| 80            | 0.10               | 14.36    | 0.03       | 2.00    | 0.41        | 0.23      | 1.59       | 1.39     | 12.90       | 0.17      | 45.66     | 48.08      | 12.41    | 49.66     |
| 90            | 1.37               | 25.05    | 0.03       | 1.43    | 0.44        | 0.37      | 2.21       | 1.35     | 11.97       | 0.14      | 36.88     | 42.14      | 19.10    | 46.26     |
| 100           | 7.68               | 28.14    | 0.02       | 1.28    | 0.43        | 0.34      | 3.39       | 2.11     | 15.26       | 0.07      | 32.65     | 41.23      | 20.23    | 45.92     |
| 110           | 31.17              | 15.89    | 0.02       | 1.24    | 1.37        | 0.22      | 4.87       | 1.40     | 9.92        | 7.38      | 27.45     | 32.37      | 11.85    | 34.47     |
| 120           | 67.96              | 24.82    | 0.03       | 0.95    | 3.38        | 0.28      | 2.39       | 0.56     | 9.30        | <0.01     | 26.18     | 31.43      | 20.44    | 37.50     |
| 130           | 103.91             | 28.09    | 0.06       | 1.80    | 4.78        | 0.31      | 2.41       | 0.52     | 9.00        | <0.01     | 29.09     | 33.99      | 24.36    | 41.82     |
| 140           | 158.69             | 31.78    | 0.07       | 1.89    | 5.80        | 0.29      | 1.98       | 0.53     | 9.01        | <0.01     | 26.54     | 32.30      | 28.17    | 42.86     |
| 150           | 208.79             | 25.84    | 0.03       | 1.75    | 5.48        | 0.22      | 1.25       | 0.49     | 8.17        | <0.01     | 19.43     | 23.50      | 24.38    | 33.86     |
| 160           | 265.98             | 22.45    | 0.04       | 1.61    | 4.09        | 0.09      | 0.77       | 0.46     | 7.83        | <0.01     | 16.51     | 18.97      | 22.31    | 29.29     |
| 170           | 330.14             | 22.67    | 0.02       | 1.64    | 1.86        | 0.05      | 0.76       | 0.48     | 8.15        | <0.01     | 10.13     | 13.50      | 22.53    | 26.26     |
| 180           | 349.00             | 21.27    | 0.04       | 1.57    | 2.19        | 0.09      | 1.01       | 0.45     | 7.54        | <0.01     | 14.51     | 16.78      | 21.13    | 26.99     |

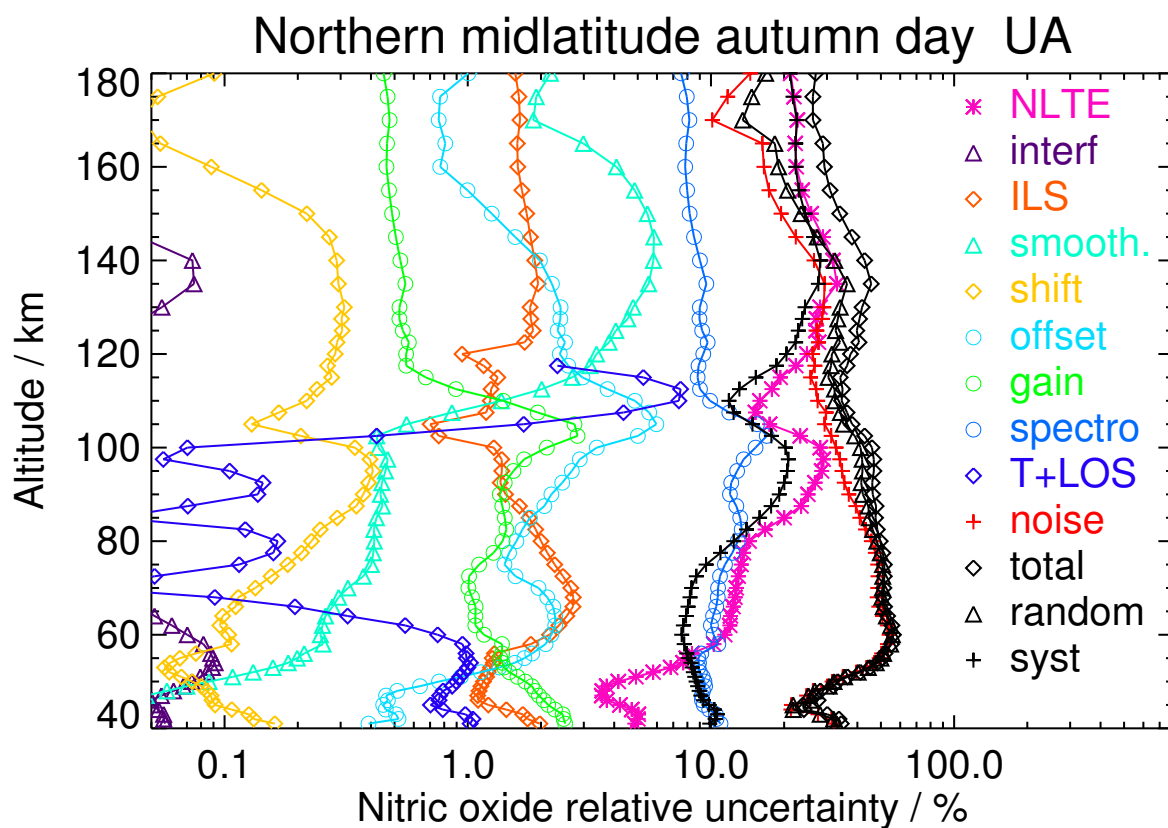

**Figure S151.** V8R\_NOwT\_662 Northern midlatitude autumn day, high solar activity

**Table S153.** Nitric oxide error budget for Northern midlatitude autumn night, high solar activity. All uncertainties are  $1\sigma$ .

| altitude (km) | mean target (ppmv) | NLTE (%) | interf (%) | ILS (%) | smooth. (%) | shift (%) | offset (%) | gain (%) | spectro (%) | T+LOS (%) | noise (%) | random (%) | syst (%) | total (%) |
|---------------|--------------------|----------|------------|---------|-------------|-----------|------------|----------|-------------|-----------|-----------|------------|----------|-----------|
| 50            | 0.00               | 11.45    | 0.22       | 0.65    | 0.30        | 0.20      | 2.82       | 0.78     | 8.51        | 1.71      | 56.98     | 57.79      | 11.08    | 58.84     |
| 60            | 0.01               | 17.18    | 0.15       | 2.36    | 0.31        | 0.06      | 4.58       | 1.11     | 5.84        | 1.03      | 59.74     | 62.11      | 8.33     | 62.67     |
| 70            | 0.05               | 16.63    | 0.11       | 2.51    | 0.40        | 0.20      | 3.93       | 1.13     | 4.79        | 0.13      | 45.35     | 47.75      | 9.96     | 48.78     |
| 80            | 0.10               | 16.07    | 0.09       | 1.67    | 0.65        | 0.20      | 3.26       | 1.03     | 6.46        | 0.13      | 53.90     | 55.59      | 11.38    | 56.74     |
| 90            | 1.20               | 17.90    | 0.08       | 1.31    | 0.76        | 0.31      | 2.89       | 1.80     | 8.68        | 0.37      | 48.48     | 50.80      | 13.40    | 52.54     |
| 100           | 6.31               | 31.02    | 0.07       | 1.36    | 1.03        | 0.53      | 3.28       | 3.22     | 12.70       | 0.61      | 42.33     | 52.31      | 14.26    | 54.22     |
| 110           | 36.76              | 22.45    | 0.04       | 1.86    | 2.06        | 0.27      | 7.55       | 3.36     | 12.79       | 10.29     | 30.40     | 40.93      | 9.93     | 42.12     |
| 120           | 57.18              | 34.17    | 0.03       | 0.79    | 4.57        | 0.12      | 3.22       | 0.54     | 9.28        | <0.01     | 28.83     | 42.58      | 17.44    | 46.01     |
| 130           | 55.84              | 34.70    | 0.03       | 1.88    | 5.52        | 0.27      | 3.26       | 0.61     | 10.39       | <0.01     | 30.74     | 42.96      | 21.37    | 47.98     |
| 140           | 71.90              | 33.34    | 0.07       | 2.05    | 6.28        | 0.23      | 3.20       | 0.63     | 10.65       | <0.01     | 30.88     | 40.38      | 24.54    | 47.25     |
| 150           | 110.95             | 32.06    | 0.08       | 2.12    | 5.70        | 0.21      | 2.26       | 0.64     | 10.62       | <0.01     | 25.50     | 35.35      | 24.15    | 42.82     |
| 160           | 126.51             | 29.96    | 0.07       | 2.09    | 4.45        | 0.17      | 1.59       | 0.62     | 10.35       | <0.01     | 21.66     | 31.01      | 23.23    | 38.75     |
| 170           | 140.57             | 29.66    | 0.07       | 2.12    | 3.34        | 0.09      | 1.55       | 0.62     | 10.52       | <0.01     | 20.74     | 30.36      | 22.75    | 37.94     |
| 180           | 145.36             | 31.47    | 0.07       | 2.28    | 3.67        | 0.11      | 1.83       | 0.66     | 11.18       | <0.01     | 27.34     | 36.92      | 22.85    | 43.42     |

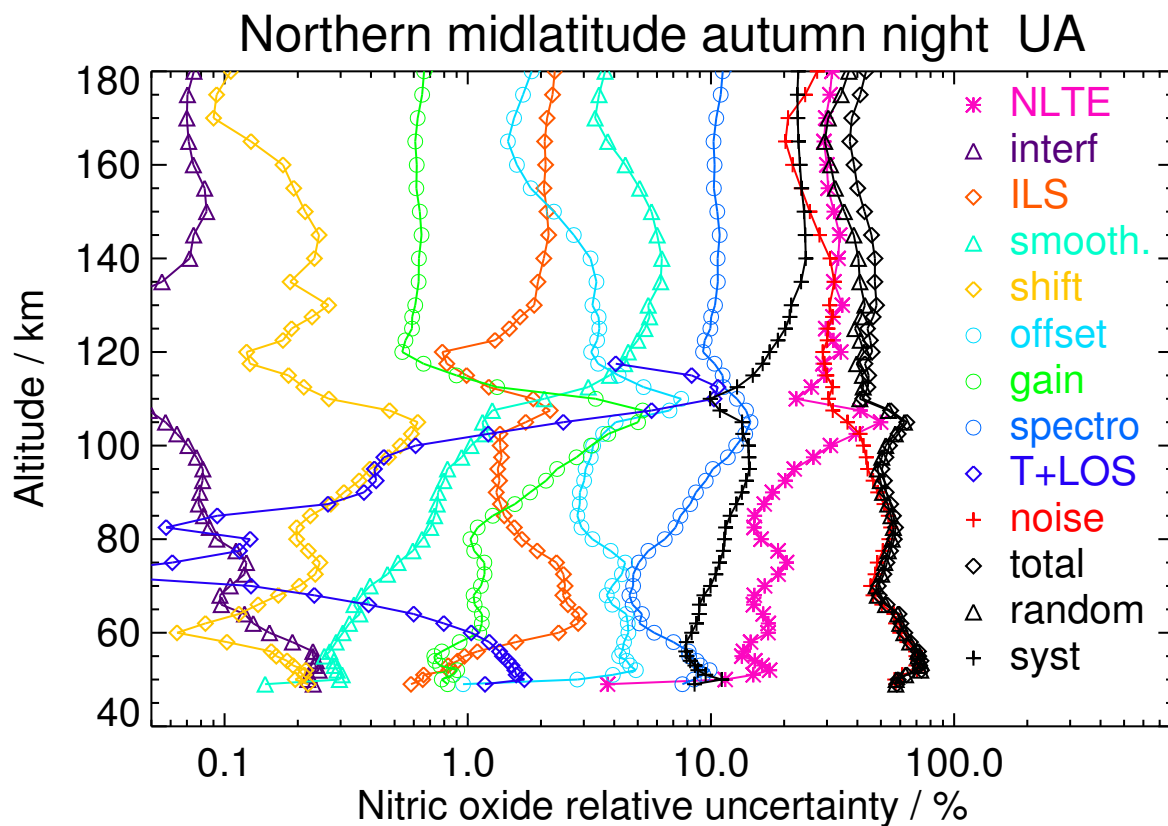

**Figure S152.** V8R\_NOwT\_662 Northern midlatitude autumn night, high solar activity

**Table S154.** Nitric oxide error budget for Tropics day, high solar activity. All uncertainties are  $1\sigma$ .

| altitude (km) | mean target (ppmv) | NLTE (%) | interf (%) | ILS (%) | smooth. (%) | shift (%) | offset (%) | gain (%) | spectro (%) | T+LOS (%) | noise (%) | random (%) | syst (%) | total (%) |
|---------------|--------------------|----------|------------|---------|-------------|-----------|------------|----------|-------------|-----------|-----------|------------|----------|-----------|
| 50            | 0.01               | 1.75     | 0.08       | 1.45    | 0.05        | 0.10      | 0.32       | 1.45     | 9.79        | 0.72      | 22.86     | 23.18      | 9.45     | 25.03     |
| 60            | 0.00               | 10.41    | 0.11       | 2.79    | 0.46        | 0.14      | 1.88       | 1.00     | 12.67       | 0.57      | 61.97     | 62.95      | 12.64    | 64.21     |
| 70            | 0.01               | 16.19    | 0.04       | 2.86    | 0.31        | 0.18      | 1.28       | 1.05     | 13.83       | <0.01     | 55.91     | 56.32      | 20.47    | 59.92     |
| 80            | 0.05               | 12.43    | 0.02       | 1.71    | 0.38        | 0.29      | 0.82       | 1.48     | 16.30       | 0.15      | 41.10     | 43.54      | 14.83    | 46.00     |
| 90            | 0.45               | 17.03    | 0.03       | 1.48    | 0.64        | 0.34      | 2.13       | 1.34     | 15.60       | 0.13      | 45.07     | 47.32      | 18.28    | 50.73     |
| 100           | 5.18               | 20.74    | 0.03       | 1.10    | 0.71        | 0.36      | 2.73       | 1.23     | 14.37       | 0.08      | 43.36     | 45.49      | 21.41    | 50.27     |
| 110           | 22.98              | 14.92    | 0.02       | 1.36    | 1.27        | 0.19      | 4.86       | 1.18     | 11.10       | 5.27      | 31.02     | 33.09      | 16.43    | 36.94     |
| 120           | 60.27              | 23.32    | 0.02       | 0.68    | 3.07        | 0.44      | 1.83       | 0.52     | 8.56        | <0.01     | 23.96     | 27.44      | 21.26    | 34.71     |
| 130           | 120.35             | 24.50    | 0.03       | 1.67    | 3.13        | 0.26      | 1.75       | 0.47     | 8.01        | <0.01     | 22.89     | 25.93      | 23.06    | 34.70     |
| 140           | 161.61             | 25.43    | 0.03       | 1.62    | 3.90        | 0.19      | 1.31       | 0.46     | 7.82        | <0.01     | 20.55     | 23.60      | 24.34    | 33.91     |
| 150           | 192.51             | 23.95    | 0.02       | 1.60    | 4.99        | 0.19      | 1.18       | 0.45     | 7.59        | <0.01     | 17.90     | 20.51      | 23.66    | 31.31     |
| 160           | 236.19             | 22.41    | 0.04       | 1.62    | 5.46        | 0.14      | 0.96       | 0.46     | 7.62        | <0.01     | 16.10     | 18.61      | 22.51    | 29.20     |
| 170           | 263.76             | 21.91    | 0.03       | 1.70    | 3.43        | 0.09      | 0.83       | 0.46     | 7.83        | <0.01     | 10.80     | 13.75      | 22.01    | 25.95     |
| 180           | 268.39             | 22.81    | 0.05       | 1.76    | 4.67        | 0.16      | 1.14       | 0.48     | 7.95        | <0.01     | 15.91     | 18.60      | 22.73    | 29.38     |

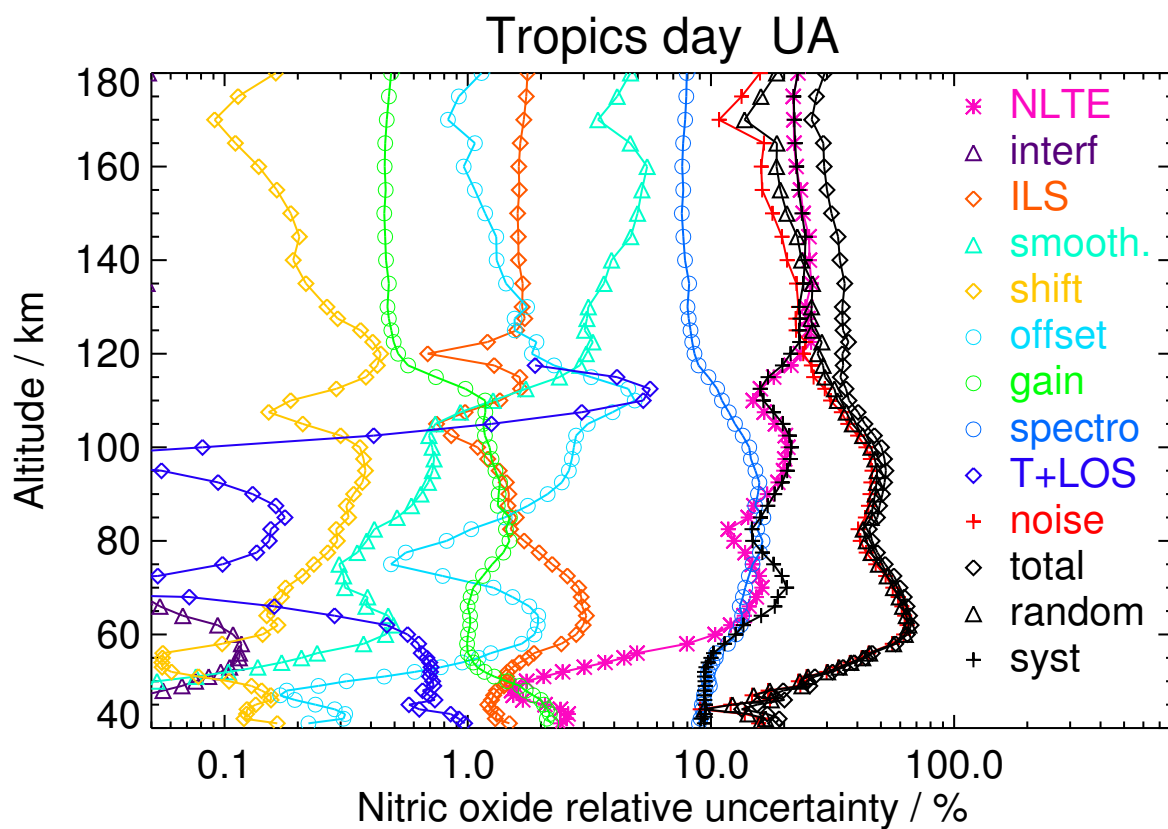

**Figure S153.** V8R\_NOwT\_662 Tropics day, high solar activity

**Table S155.** Nitric oxide error budget for Tropics night, high solar activity. All uncertainties are  $1\sigma$ .

| altitude (km) | mean target (ppmv) | NLTE (%) | interf (%) | ILS (%) | smooth. (%) | shift (%) | offset (%) | gain (%) | spectro (%) | T+LOS (%) | noise (%) | random (%) | syst (%) | total (%) |
|---------------|--------------------|----------|------------|---------|-------------|-----------|------------|----------|-------------|-----------|-----------|------------|----------|-----------|
| 60            | 0.00               | 8.21     | 0.36       | 1.56    | 0.44        | 0.15      | 4.53       | 0.67     | 12.15       | 1.22      | 96.14     | 96.89      | 9.76     | 97.38     |
| 70            | 0.01               | 4.99     | 0.18       | 0.63    | 0.64        | 0.16      | 3.09       | 0.43     | 8.29        | 0.06      | 70.14     | 70.22      | 9.70     | 70.88     |
| 90            | 0.36               | 11.66    | 0.08       | 0.79    | 0.76        | 0.19      | 2.58       | 1.07     | 10.57       | 0.23      | 51.94     | 52.99      | 12.08    | 54.35     |
| 100           | 5.32               | 13.32    | 0.05       | 0.67    | 0.67        | 0.22      | 4.07       | 2.00     | 13.01       | 0.26      | 41.31     | 44.16      | 11.15    | 45.55     |
| 110           | 27.38              | 8.94     | 0.03       | 1.69    | 1.77        | 0.10      | 5.08       | 1.35     | 8.24        | 9.56      | 25.37     | 28.38      | 10.56    | 30.28     |
| 120           | 49.48              | 17.12    | 0.02       | 0.63    | 3.64        | 0.13      | 3.60       | 0.47     | 7.93        | <0.01     | 26.29     | 28.04      | 16.97    | 32.78     |
| 130           | 43.87              | 20.63    | 0.03       | 2.07    | 5.18        | 0.19      | 4.08       | 0.48     | 8.09        | <0.01     | 32.14     | 34.33      | 19.84    | 39.65     |
| 140           | 37.97              | 23.24    | 0.05       | 2.06    | 7.35        | 0.17      | 3.84       | 0.49     | 8.41        | <0.01     | 33.90     | 37.26      | 21.10    | 42.82     |
| 150           | 44.52              | 22.94    | 0.05       | 1.91    | 7.84        | 0.12      | 2.74       | 0.51     | 8.63        | <0.01     | 30.19     | 33.79      | 21.06    | 39.81     |
| 160           | 52.71              | 22.38    | 0.04       | 1.82    | 6.92        | 0.07      | 2.26       | 0.51     | 8.68        | <0.01     | 28.06     | 31.19      | 21.15    | 37.69     |
| 170           | 61.25              | 22.53    | 0.04       | 1.82    | 6.64        | 0.05      | 2.54       | 0.51     | 8.78        | <0.01     | 33.88     | 36.50      | 21.30    | 42.26     |
| 180           | 64.09              | 22.76    | 0.04       | 1.84    | 6.89        | 0.05      | 2.73       | 0.51     | 8.89        | <0.01     | 39.47     | 41.90      | 21.40    | 47.05     |

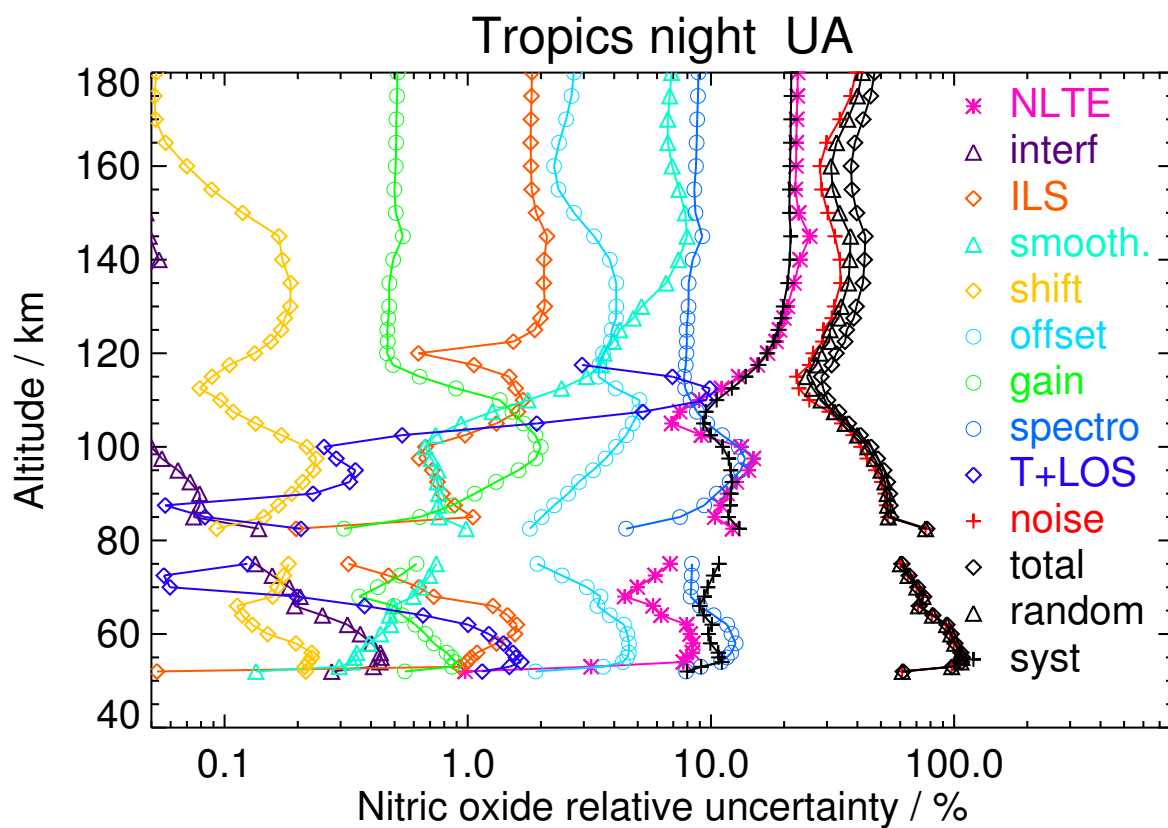

**Figure S154.** V8R\_NOwT\_662 Tropics night, high solar activity

**Table S156.** Nitric oxide error budget for Southern midlatitude winter day, high solar activity. All uncertainties are  $1\sigma$ .

| altitude (km) | mean target (ppmv) | NLTE (%) | interf (%) | ILS (%) | smooth. (%) | shift (%) | offset (%) | gain (%) | spectro (%) | T+LOS (%) | noise (%) | random (%) | syst (%) | total (%) |
|---------------|--------------------|----------|------------|---------|-------------|-----------|------------|----------|-------------|-----------|-----------|------------|----------|-----------|
| 50            | 0.01               | 2.07     | 0.05       | 0.63    | 0.05        | 0.07      | 0.91       | 1.61     | 9.07        | 0.93      | 24.97     | 25.57      | 7.80     | 26.74     |
| 60            | 0.01               | 4.19     | 0.05       | 2.09    | 0.12        | 0.07      | 2.33       | 1.29     | 10.40       | 0.56      | 43.20     | 44.14      | 7.46     | 44.77     |
| 70            | 0.06               | 6.16     | 0.02       | 3.55    | 0.16        | 0.07      | 2.47       | 0.98     | 11.12       | <0.01     | 38.06     | 39.63      | 7.71     | 40.37     |
| 80            | 0.21               | 8.34     | 0.01       | 1.94    | 0.24        | 0.10      | 2.61       | 0.91     | 10.12       | 0.14      | 35.77     | 37.16      | 9.05     | 38.25     |
| 90            | 2.27               | 19.12    | 0.01       | 1.68    | 0.35        | 0.15      | 2.32       | 1.17     | 10.10       | 0.02      | 30.47     | 34.54      | 14.58    | 37.49     |
| 100           | 7.22               | 17.09    | 0.01       | 1.78    | 0.63        | 0.15      | 1.94       | 1.00     | 10.17       | 0.52      | 31.15     | 34.28      | 14.14    | 37.08     |
| 110           | 37.35              | 18.51    | 0.02       | 0.63    | 1.39        | 0.13      | 7.62       | 1.47     | 13.06       | 12.63     | 25.15     | 35.36      | 10.83    | 36.98     |
| 120           | 89.01              | 29.71    | 0.04       | 1.68    | 3.72        | 0.38      | 2.56       | 0.69     | 11.37       | <0.01     | 26.28     | 36.83      | 19.23    | 41.55     |
| 130           | 117.87             | 29.99    | 0.05       | 2.64    | 5.27        | 0.47      | 2.73       | 0.58     | 9.58        | <0.01     | 29.88     | 37.35      | 23.06    | 43.89     |
| 140           | 135.17             | 31.84    | 0.04       | 2.25    | 6.42        | 0.44      | 2.99       | 0.54     | 8.99        | <0.01     | 30.54     | 38.18      | 24.99    | 45.64     |
| 150           | 183.16             | 26.81    | 0.06       | 1.92    | 6.50        | 0.27      | 2.39       | 0.52     | 8.57        | <0.01     | 25.16     | 30.84      | 22.94    | 38.43     |
| 160           | 205.26             | 23.92    | 0.06       | 1.76    | 5.46        | 0.17      | 1.74       | 0.50     | 8.27        | <0.01     | 21.89     | 26.35      | 21.50    | 34.00     |
| 170           | 259.46             | 23.13    | 0.05       | 1.75    | 4.19        | 0.13      | 1.46       | 0.50     | 8.33        | <0.01     | 18.03     | 22.70      | 20.91    | 30.86     |
| 180           | 266.37             | 22.92    | 0.05       | 1.74    | 4.85        | 0.14      | 1.65       | 0.50     | 8.36        | <0.01     | 24.18     | 27.93      | 20.72    | 34.77     |

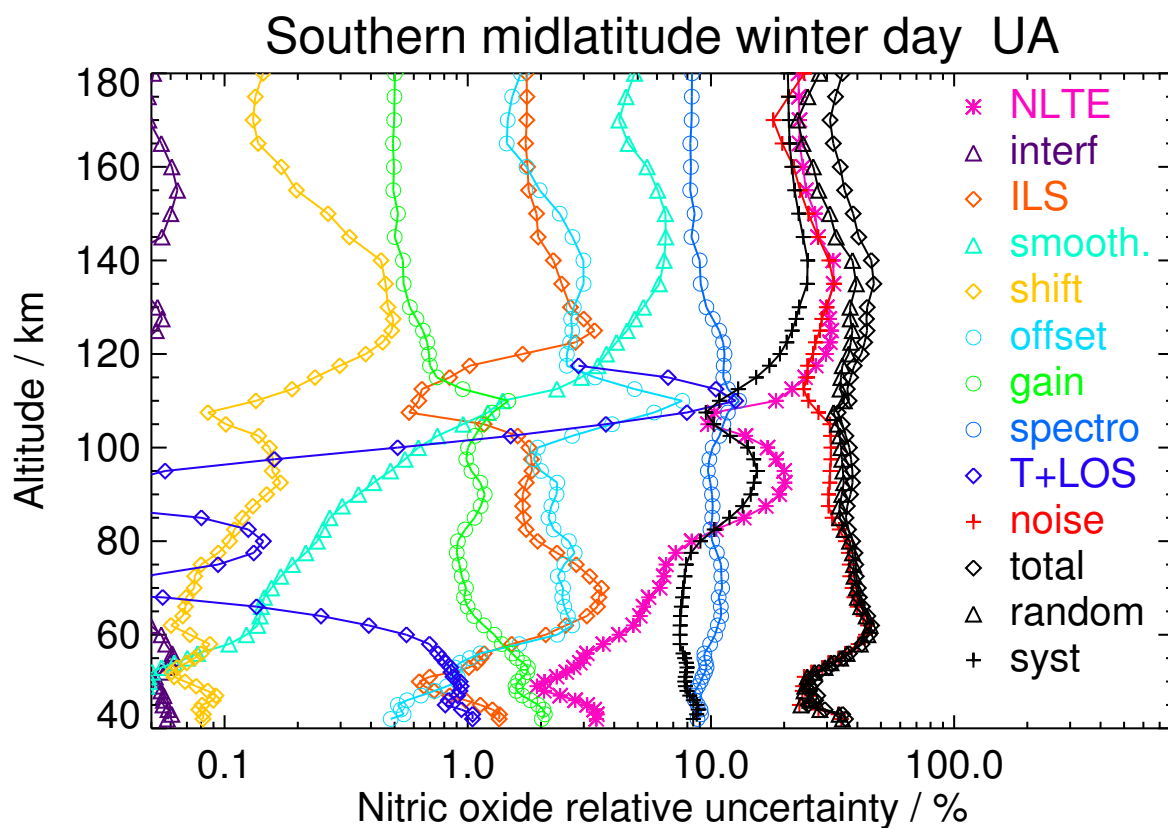

**Figure S155.** V8R\_NOwT\_662 Southern midlatitude winter day, high solar activity



**Table S157.** Nitric oxide error budget for Southern midlatitude winter night, high solar activity. All uncertainties are  $1\sigma$ .

| altitude (km) | mean target (ppmv) | NLTE (%) | interf (%) | ILS (%) | smooth. (%) | shift (%) | offset (%) | gain (%) | spectro (%) | T+LOS (%) | noise (%) | random (%) | syst (%) | total (%) |
|---------------|--------------------|----------|------------|---------|-------------|-----------|------------|----------|-------------|-----------|-----------|------------|----------|-----------|
| 50            | 0.00               | 12.74    | 0.20       | 0.33    | 0.11        | 0.14      | 3.07       | 0.58     | 11.42       | 1.32      | 59.93     | 61.39      | 11.29    | 62.42     |
| 60            | 0.01               | 14.30    | 0.14       | 2.05    | 0.24        | 0.13      | 5.07       | 1.31     | 12.15       | 1.20      | 64.55     | 67.00      | 7.94     | 67.47     |
| 70            | 0.05               | 10.90    | 0.05       | 4.19    | 0.29        | 0.20      | 3.43       | 1.61     | 12.40       | 0.16      | 48.31     | 50.71      | 8.21     | 51.37     |
| 80            | 0.51               | 17.21    | 0.06       | 2.72    | 0.25        | 0.18      | 14.23      | 6.47     | 26.05       | 0.29      | 31.99     | 46.27      | 10.41    | 47.43     |
| 90            | 3.20               | 33.97    | 0.05       | 1.47    | 0.43        | 0.33      | 8.06       | 3.95     | 21.00       | 0.22      | 37.61     | 53.79      | 14.11    | 55.61     |
| 100           | 17.88              | 30.36    | 0.04       | 0.72    | 0.43        | 0.32      | 10.42      | 3.94     | 20.33       | 1.80      | 34.28     | 49.62      | 13.29    | 51.36     |
| 110           | 42.77              | 16.63    | 0.02       | 1.80    | 1.75        | 0.14      | 9.36       | 2.19     | 10.70       | 17.48     | 27.57     | 37.40      | 12.51    | 39.44     |
| 120           | 114.04             | 32.75    | 0.01       | 0.98    | 3.33        | 0.24      | 2.62       | 0.59     | 9.89        | <0.01     | 25.89     | 37.54      | 21.23    | 43.13     |
| 130           | 143.33             | 36.68    | 0.01       | 2.59    | 3.92        | 0.45      | 2.22       | 0.66     | 10.95       | <0.01     | 24.75     | 39.55      | 23.27    | 45.89     |
| 140           | 125.37             | 37.63    | 0.02       | 2.74    | 5.69        | 0.45      | 2.71       | 0.67     | 11.04       | <0.01     | 29.15     | 42.96      | 24.29    | 49.35     |
| 150           | 126.78             | 34.67    | 0.02       | 2.67    | 6.04        | 0.34      | 2.23       | 0.70     | 11.56       | <0.01     | 26.37     | 39.49      | 22.83    | 45.61     |
| 160           | 109.99             | 28.30    | 0.03       | 2.22    | 5.85        | 0.20      | 1.98       | 0.61     | 10.15       | <0.01     | 26.78     | 34.80      | 21.30    | 40.80     |
| 170           | 109.67             | 27.67    | 0.02       | 2.21    | 5.54        | 0.18      | 2.30       | 0.61     | 10.13       | <0.01     | 30.79     | 37.60      | 21.07    | 43.10     |
| 180           | 110.87             | 27.92    | 0.02       | 2.19    | 5.83        | 0.19      | 2.58       | 0.61     | 10.26       | <0.01     | 37.05     | 42.97      | 21.37    | 47.99     |

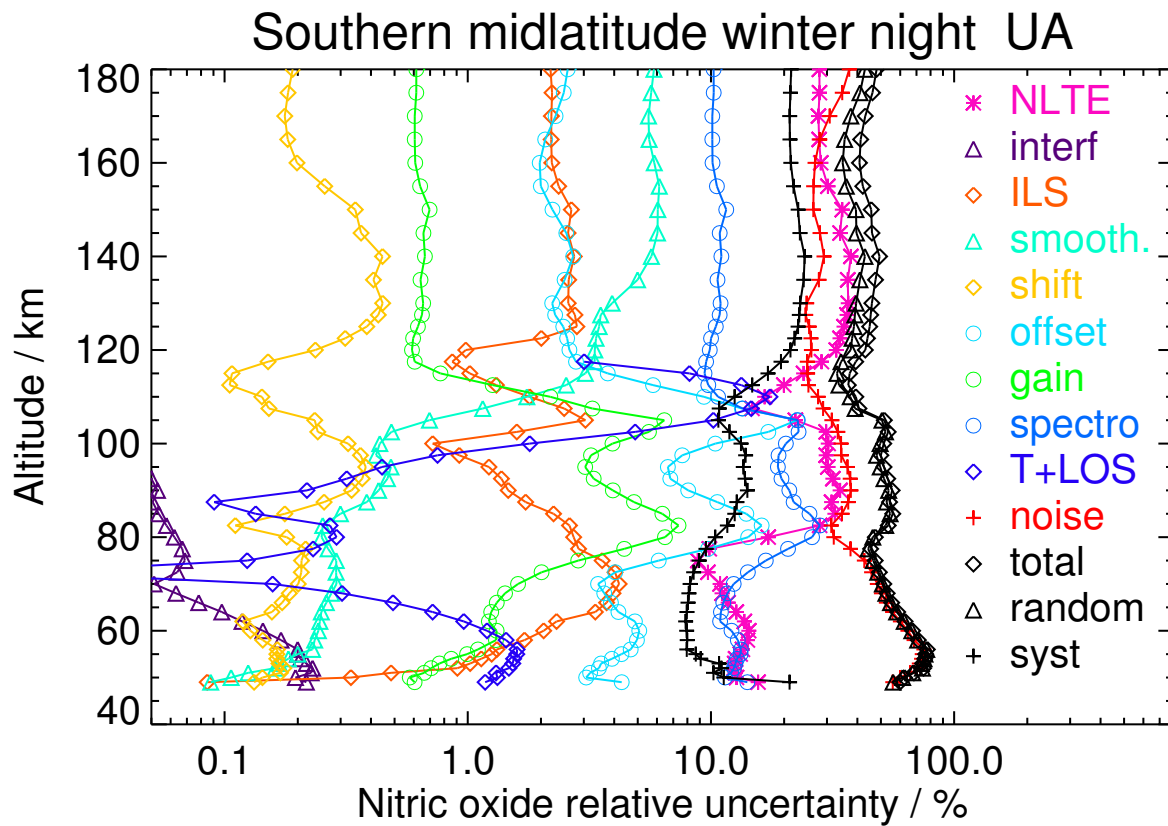

**Figure S156.** V8R\_NOwT\_662 Southern midlatitude winter night, high solar activity

**Table S158.** Nitric oxide error budget for Southern midlatitude spring day, high solar activity. All uncertainties are  $1\sigma$ .

| altitude (km) | mean target (ppmv) | NLTE (%) | interf (%) | ILS (%) | smooth. (%) | shift (%) | offset (%) | gain (%) | spectro (%) | T+LOS (%) | noise (%) | random (%) | syst (%) | total (%) |
|---------------|--------------------|----------|------------|---------|-------------|-----------|------------|----------|-------------|-----------|-----------|------------|----------|-----------|
| 50            | 0.01               | 4.05     | 0.09       | 1.23    | 0.07        | 0.09      | 0.58       | 1.41     | 8.38        | 0.88      | 29.28     | 29.72      | 8.05     | 30.79     |
| 60            | 0.01               | 9.27     | 0.07       | 2.48    | 0.15        | 0.28      | 2.43       | 1.20     | 11.07       | 0.91      | 42.12     | 44.13      | 7.04     | 44.69     |
| 70            | 0.04               | 20.61    | 0.11       | 3.01    | 0.19        | 0.86      | 3.04       | 1.78     | 13.56       | 0.02      | 42.78     | 48.43      | 10.73    | 49.61     |
| 80            | 0.05               | 24.47    | 0.14       | 3.68    | 0.49        | 1.45      | 4.50       | 1.30     | 13.47       | 0.34      | 52.57     | 57.14      | 17.81    | 59.85     |
| 90            | 0.61               | 27.55    | 0.10       | 2.87    | 0.58        | 1.42      | 5.21       | 1.24     | 10.95       | <0.01     | 48.52     | 52.18      | 23.45    | 57.20     |
| 100           | 7.86               | 28.58    | 0.09       | 1.60    | 0.53        | 1.27      | 3.83       | 1.08     | 11.52       | 0.03      | 40.88     | 45.54      | 23.80    | 51.39     |
| 110           | 52.69              | 25.59    | 0.03       | 2.56    | 0.62        | 0.65      | 5.81       | 1.42     | 9.35        | 9.21      | 23.58     | 33.19      | 18.01    | 37.76     |
| 120           | 111.53             | 33.08    | 0.03       | 1.06    | 2.01        | 0.46      | 1.46       | 0.51     | 8.67        | <0.01     | 20.11     | 27.28      | 28.94    | 39.77     |
| 130           | 169.92             | 24.11    | 0.05       | 1.77    | 2.54        | 0.27      | 0.96       | 0.48     | 8.14        | <0.01     | 18.41     | 21.13      | 23.46    | 31.58     |
| 140           | 229.21             | 25.41    | 0.10       | 1.60    | 3.18        | 0.24      | 0.95       | 0.47     | 7.98        | <0.01     | 17.33     | 19.95      | 25.01    | 32.00     |
| 150           | 269.29             | 23.86    | 0.08       | 1.62    | 3.56        | 0.24      | 0.96       | 0.47     | 7.82        | <0.01     | 13.31     | 16.36      | 23.59    | 28.71     |
| 160           | 320.68             | 22.52    | 0.05       | 1.59    | 3.11        | 0.13      | 0.90       | 0.47     | 7.90        | <0.01     | 12.11     | 15.18      | 22.34    | 27.01     |
| 170           | 347.80             | 23.30    | 0.04       | 1.58    | 1.78        | 0.07      | 1.10       | 0.47     | 8.04        | <0.01     | 13.29     | 16.44      | 22.82    | 28.13     |
| 180           | 394.29             | 22.83    | 0.05       | 1.59    | 1.23        | 0.07      | 0.65       | 0.46     | 7.82        | <0.01     | 9.14      | 13.86      | 21.88    | 25.90     |

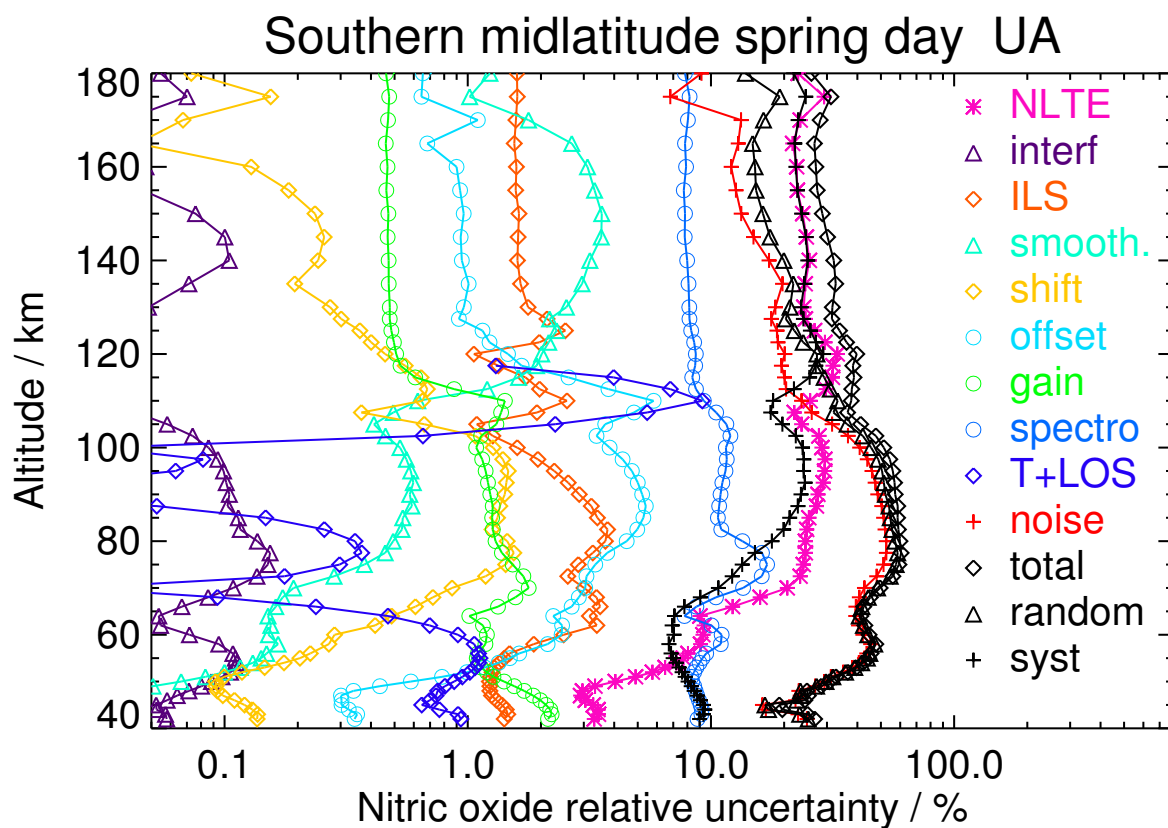

**Figure S157.** V8R\_NOwT\_662 Southern midlatitude spring day, high solar activity

**Table S159.** Nitric oxide error budget for Southern midlatitude spring night, high solar activity. All uncertainties are  $1\sigma$ .

| altitude (km) | mean target (ppmv) | NLTE (%) | interf (%) | ILS (%) | smooth. (%) | shift (%) | offset (%) | gain (%) | spectro (%) | T+LOS (%) | noise (%) | random (%) | syst (%) | total (%) |
|---------------|--------------------|----------|------------|---------|-------------|-----------|------------|----------|-------------|-----------|-----------|------------|----------|-----------|
| 60            | 0.01               | 26.07    | 0.16       | 2.60    | 0.23        | 0.13      | 4.91       | 1.45     | 18.34       | 1.84      | 60.79     | 66.42      | 18.35    | 68.91     |
| 70            | 0.09               | 17.22    | 0.04       | 4.88    | 0.11        | 0.49      | 2.98       | 3.01     | 17.04       | 0.22      | 44.45     | 49.00      | 14.27    | 51.04     |
| 80            | 0.13               | 19.84    | 0.06       | 0.93    | 0.32        | 0.68      | 2.83       | 1.56     | 11.58       | 0.25      | 54.66     | 54.74      | 23.03    | 59.39     |
| 90            | 0.83               | 23.63    | 0.10       | 1.19    | 0.43        | 0.99      | 4.56       | 2.04     | 12.07       | 0.15      | 48.78     | 54.41      | 12.27    | 55.78     |
| 100           | 16.82              | 29.95    | 0.06       | 3.84    | 0.45        | 1.29      | 20.00      | 3.10     | 7.44        | 0.77      | 34.07     | 49.59      | 8.97     | 50.40     |
| 110           | 75.43              | 21.69    | 0.06       | 6.02    | 0.76        | 0.52      | 13.94      | 2.79     | 7.26        | 10.93     | 22.04     | 35.46      | 10.49    | 36.98     |
| 120           | 124.36             | 33.05    | 0.09       | 0.80    | 2.44        | 0.22      | 1.89       | 0.56     | 9.52        | <0.01     | 22.62     | 33.05      | 24.77    | 41.30     |
| 130           | 152.03             | 31.79    | 0.09       | 2.29    | 3.06        | 0.50      | 1.32       | 0.58     | 9.59        | <0.01     | 20.70     | 31.82      | 23.13    | 39.34     |
| 140           | 147.66             | 32.52    | 0.09       | 1.98    | 4.36        | 0.42      | 1.58       | 0.60     | 9.99        | <0.01     | 22.35     | 32.46      | 25.07    | 41.02     |
| 150           | 159.41             | 26.27    | 0.12       | 1.87    | 4.75        | 0.28      | 1.49       | 0.54     | 8.87        | <0.01     | 18.93     | 25.31      | 22.70    | 34.00     |
| 160           | 165.70             | 24.62    | 0.13       | 1.86    | 4.25        | 0.12      | 1.18       | 0.53     | 8.87        | <0.01     | 18.11     | 23.58      | 21.92    | 32.19     |
| 170           | 188.48             | 23.97    | 0.11       | 1.95    | 2.69        | 0.05      | 1.08       | 0.51     | 8.74        | <0.01     | 15.05     | 20.60      | 21.57    | 29.83     |
| 180           | 192.71             | 26.02    | 0.13       | 1.76    | 2.64        | 0.06      | 1.15       | 0.55     | 9.28        | <0.01     | 18.25     | 24.14      | 22.91    | 33.28     |

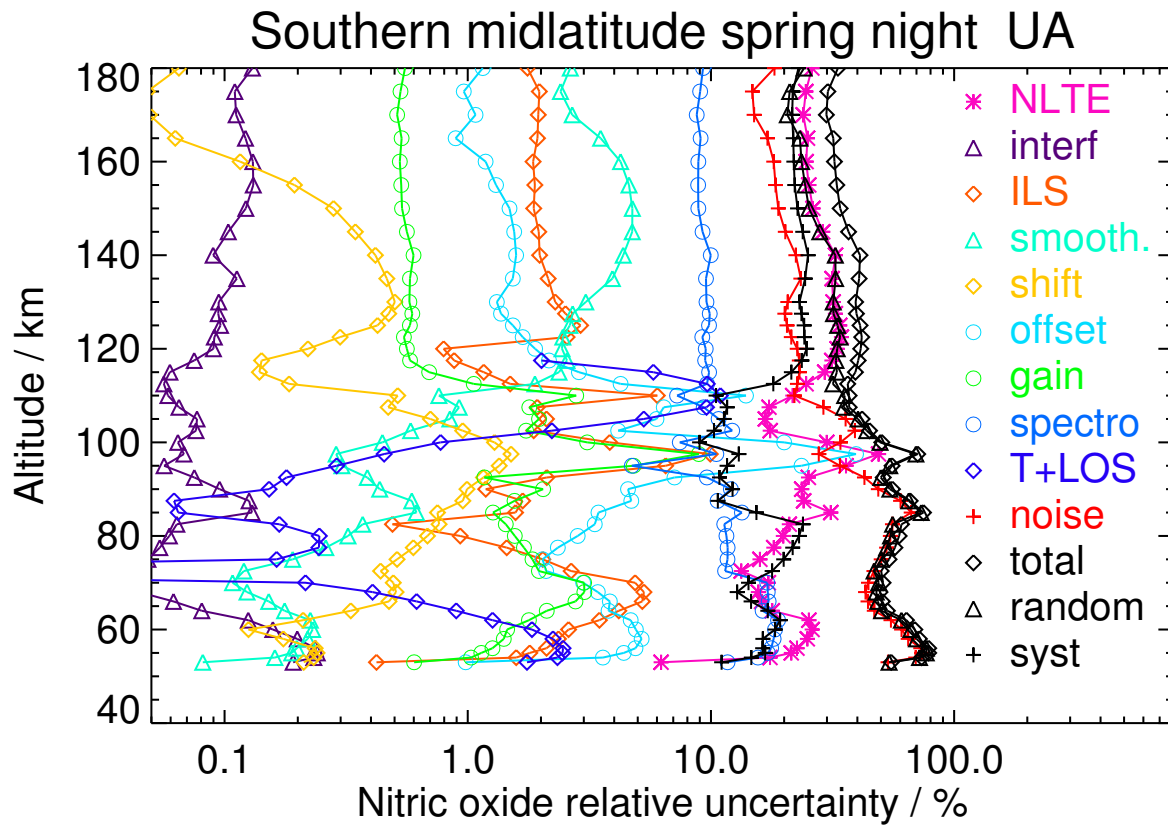

**Figure S158.** V8R\_NOwT\_662 Southern midlatitude spring night, high solar activity

**Table S160.** Nitric oxide error budget for Southern midlatitude summer day, high solar activity. All uncertainties are  $1\sigma$ .

| altitude (km) | mean target (ppmv) | NLTE (%) | interf (%) | ILS (%) | smooth. (%) | shift (%) | offset (%) | gain (%) | spectro (%) | T+LOS (%) | noise (%) | random (%) | syst (%) | total (%) |
|---------------|--------------------|----------|------------|---------|-------------|-----------|------------|----------|-------------|-----------|-----------|------------|----------|-----------|
| 50            | 0.01               | 1.73     | 0.06       | 1.03    | 0.02        | 0.08      | 0.25       | 1.24     | 8.30        | 0.80      | 20.55     | 20.76      | 8.16     | 22.30     |
| 60            | 0.01               | 8.35     | 0.10       | 2.96    | 0.18        | 0.31      | 1.90       | 0.58     | 8.25        | 1.59      | 47.77     | 48.80      | 7.36     | 49.35     |
| 70            | 0.02               | 12.47    | 0.05       | 3.65    | 0.26        | 0.49      | 2.55       | 0.79     | 7.76        | 0.14      | 43.92     | 45.48      | 9.84     | 46.53     |
| 80            | 0.06               | 13.18    | 0.06       | 2.54    | 0.38        | 0.52      | 3.26       | 0.78     | 8.43        | 5.10      | 43.99     | 45.40      | 12.77    | 47.16     |
| 90            | 1.17               | 23.18    | 0.08       | 1.67    | 0.50        | 1.00      | 3.90       | 1.08     | 7.77        | 2.16      | 41.73     | 45.64      | 16.77    | 48.62     |
| 100           | 15.23              | 20.26    | 0.07       | 1.53    | 0.41        | 0.97      | 3.73       | 1.48     | 8.39        | 0.79      | 35.57     | 38.90      | 15.91    | 42.03     |
| 110           | 39.30              | 21.74    | 0.03       | 4.17    | 0.68        | 0.39      | 7.27       | 1.75     | 9.01        | >100      | 22.47     | >100       | 19.49    | >100      |
| 120           | 105.28             | 43.93    | 0.05       | 0.73    | 2.23        | 0.35      | 1.91       | 0.51     | 8.53        | <0.01     | 22.80     | 34.91      | 36.24    | 50.32     |
| 130           | 209.32             | 31.91    | 0.06       | 1.87    | 2.52        | 0.32      | 1.06       | 0.50     | 8.47        | <0.01     | 19.43     | 24.84      | 29.36    | 38.45     |
| 140           | 315.25             | 32.22    | 0.13       | 1.74    | 2.96        | 0.36      | 0.90       | 0.50     | 8.38        | <0.01     | 17.17     | 22.91      | 29.85    | 37.63     |
| 150           | 375.07             | 29.96    | 0.08       | 1.69    | 3.58        | 0.25      | 0.96       | 0.48     | 7.90        | <0.01     | 13.14     | 17.51      | 29.04    | 33.91     |
| 160           | 399.86             | 29.05    | 0.07       | 1.64    | 3.35        | 0.10      | 0.97       | 0.47     | 7.98        | <0.01     | 12.53     | 16.91      | 28.17    | 32.86     |
| 170           | 466.67             | 29.49    | 0.05       | 1.68    | 2.18        | 0.06      | 1.11       | 0.48     | 8.28        | <0.01     | 13.41     | 17.35      | 28.74    | 33.57     |
| 180           | 503.79             | 29.47    | 0.08       | 1.72    | 1.58        | 0.07      | 0.68       | 0.48     | 8.18        | <0.01     | 9.40      | 14.71      | 28.52    | 32.09     |

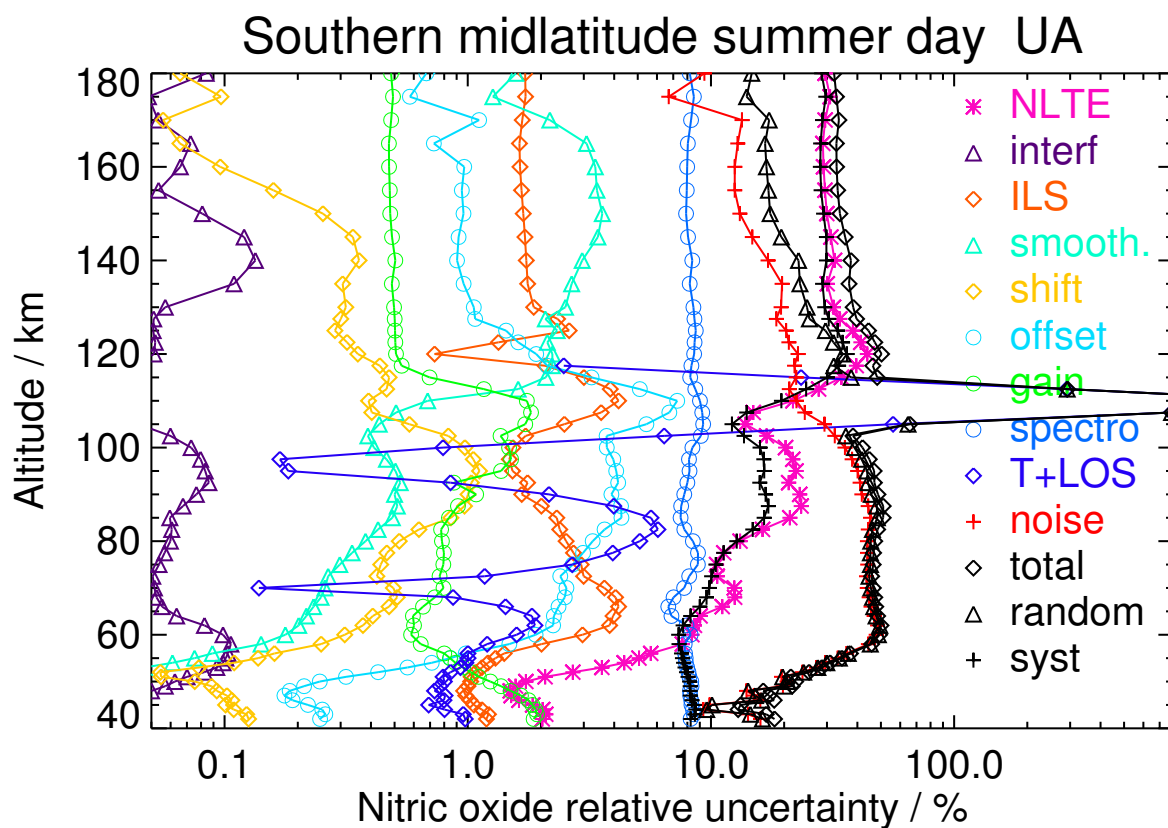

**Figure S159.** V8R\_NOwT\_662 Southern midlatitude summer day, high solar activity

**Table S161.** Nitric oxide error budget for Southern midlatitude summer night, high solar activity. All uncertainties are  $1\sigma$ .

| altitude (km) | mean target (ppmv) | NLTE (%) | interf (%) | ILS (%) | smooth. (%) | shift (%) | offset (%) | gain (%) | spectro (%) | T+LOS (%) | noise (%) | random (%) | syst (%) | total (%) |
|---------------|--------------------|----------|------------|---------|-------------|-----------|------------|----------|-------------|-----------|-----------|------------|----------|-----------|
| 50            | 0.00               | 2.93     | 0.28       | 1.58    | 0.06        | 0.27      | 2.17       | 0.81     | 10.85       | 1.19      | 51.27     | 51.33      | 11.38    | 52.58     |
| 60            | 0.01               | 12.81    | 0.25       | 1.44    | 0.31        | 0.14      | 4.46       | 1.40     | 13.69       | 1.47      | 66.06     | 68.45      | 7.52     | 68.86     |
| 70            | 0.05               | 6.94     | 0.07       | 1.34    | 0.22        | 0.28      | 3.92       | 1.91     | 11.71       | 0.13      | 45.37     | 46.01      | 12.15    | 47.59     |
| 80            | 0.06               | 7.53     | 0.08       | 2.31    | 0.40        | 0.32      | 3.90       | 1.86     | 12.43       | 0.21      | 46.49     | 47.73      | 10.93    | 48.96     |
| 90            | 1.23               | 10.28    | 0.08       | 2.25    | 0.58        | 0.42      | 4.72       | 1.99     | 12.48       | <0.01     | 44.08     | 46.12      | 10.44    | 47.29     |
| 100           | 9.06               | 9.44     | 0.08       | 1.94    | 0.58        | 0.32      | 6.19       | 2.30     | 11.49       | 3.81      | 37.92     | 40.52      | 8.90     | 41.49     |
| 110           | 22.49              | 14.49    | 0.06       | 2.49    | 1.97        | 0.18      | 7.10       | 1.71     | 8.42        | 17.85     | 29.99     | 38.15      | 10.34    | 39.53     |
| 120           | 54.27              | 28.50    | 0.07       | 1.17    | 3.83        | 0.16      | 2.76       | 0.53     | 9.11        | <0.01     | 25.87     | 33.34      | 21.84    | 39.86     |
| 130           | 83.76              | 34.54    | 0.07       | 2.05    | 4.42        | 0.24      | 2.64       | 0.51     | 8.90        | <0.01     | 27.19     | 37.26      | 25.57    | 45.19     |
| 140           | 111.07             | 39.70    | 0.06       | 2.15    | 5.45        | 0.30      | 2.53       | 0.60     | 10.33       | <0.01     | 27.37     | 40.42      | 28.96    | 49.72     |
| 150           | 129.70             | 39.86    | 0.09       | 2.29    | 6.28        | 0.30      | 2.30       | 0.65     | 10.78       | <0.01     | 24.66     | 39.65      | 28.14    | 48.62     |
| 160           | 158.14             | 35.68    | 0.09       | 2.16    | 5.71        | 0.23      | 1.82       | 0.60     | 9.93        | <0.01     | 21.71     | 34.27      | 26.65    | 43.41     |
| 170           | 190.97             | 34.50    | 0.08       | 2.14    | 4.26        | 0.17      | 1.65       | 0.59     | 9.74        | <0.01     | 19.84     | 32.03      | 26.05    | 41.29     |
| 180           | 203.00             | 33.48    | 0.10       | 2.02    | 4.62        | 0.16      | 1.81       | 0.57     | 9.44        | <0.01     | 25.10     | 34.36      | 26.24    | 43.24     |

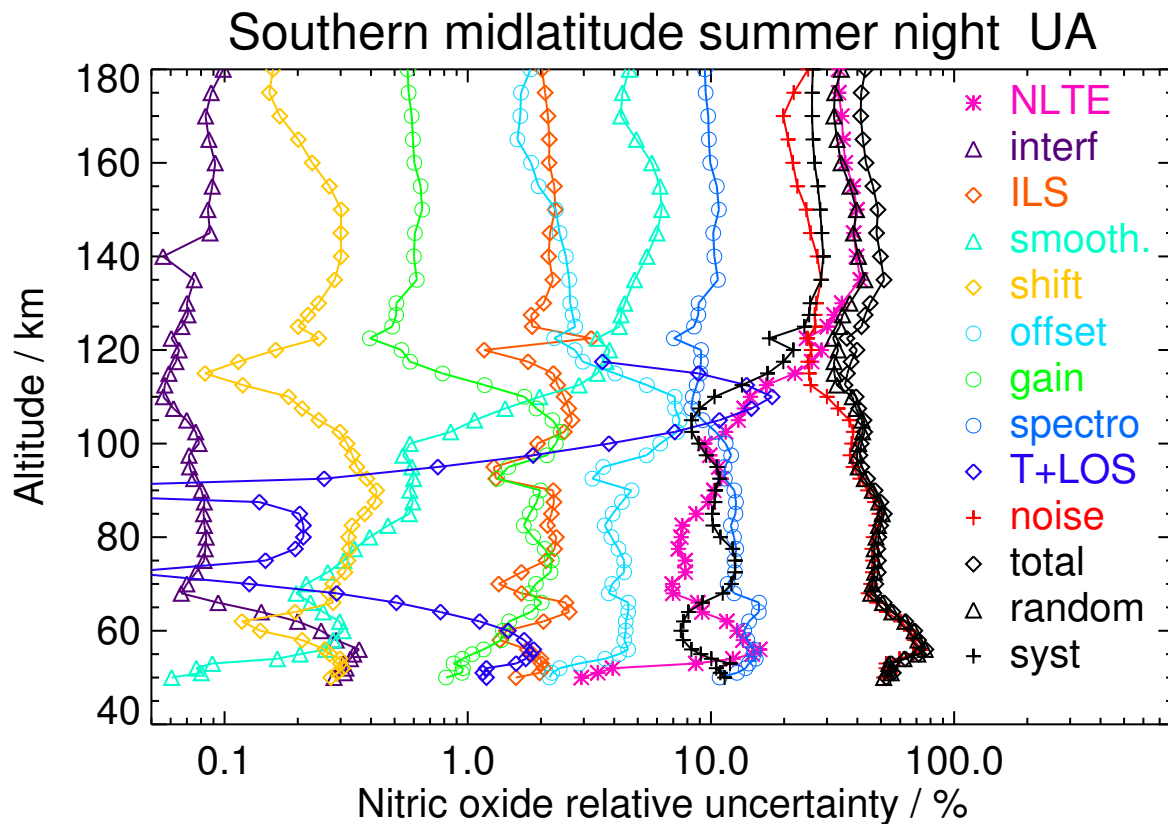

**Figure S160.** V8R\_NOwT\_662 Southern midlatitude summer night, high solar activity

**Table S162.** Nitric oxide error budget for Southern midlatitude autumn day, high solar activity. All uncertainties are  $1\sigma$ .

| altitude (km) | mean target (ppmv) | NLTE (%) | interf (%) | ILS (%) | smooth. (%) | shift (%) | offset (%) | gain (%) | spectro (%) | T+LOS (%) | noise (%) | random (%) | syst (%) | total (%) |
|---------------|--------------------|----------|------------|---------|-------------|-----------|------------|----------|-------------|-----------|-----------|------------|----------|-----------|
| 50            | 0.01               | 2.95     | 0.08       | 1.24    | 0.09        | 0.09      | 0.70       | 1.66     | 9.24        | 0.87      | 32.59     | 32.98      | 8.60     | 34.08     |
| 60            | 0.00               | 7.80     | 0.09       | 2.18    | 0.31        | 0.05      | 2.67       | 1.13     | 9.99        | 0.54      | 59.77     | 60.71      | 7.82     | 61.21     |
| 70            | 0.02               | 10.60    | 0.04       | 2.10    | 0.41        | 0.10      | 2.26       | 1.00     | 8.70        | 0.03      | 54.71     | 55.78      | 8.96     | 56.50     |
| 80            | 0.05               | 13.81    | 0.03       | 1.58    | 0.72        | 0.15      | 1.76       | 0.83     | 9.08        | 0.16      | 58.40     | 59.51      | 12.20    | 60.75     |
| 90            | 0.74               | 18.01    | 0.02       | 1.22    | 0.74        | 0.18      | 1.98       | 0.85     | 9.08        | 0.12      | 47.11     | 48.96      | 15.37    | 51.31     |
| 100           | 5.76               | 16.21    | 0.01       | 0.70    | 0.57        | 0.15      | 2.20       | 1.26     | 9.51        | 0.04      | 35.45     | 37.74      | 13.90    | 40.22     |
| 110           | 32.82              | 12.56    | <0.01      | 1.02    | 1.50        | 0.11      | 4.98       | 1.53     | 9.57        | 9.28      | 27.44     | 31.63      | 10.85    | 33.44     |
| 120           | 64.83              | 25.52    | 0.01       | 0.76    | 4.19        | 0.21      | 2.89       | 0.60     | 10.03       | <0.01     | 29.06     | 35.06      | 19.84    | 40.29     |
| 130           | 89.94              | 30.59    | 0.02       | 2.13    | 5.49        | 0.26      | 2.87       | 0.57     | 9.80        | <0.01     | 31.57     | 38.18      | 24.79    | 45.52     |
| 140           | 127.06             | 34.04    | 0.01       | 2.00    | 6.25        | 0.27      | 2.58       | 0.54     | 9.28        | <0.01     | 28.63     | 36.68      | 27.73    | 45.98     |
| 150           | 172.90             | 28.09    | 0.03       | 1.86    | 6.68        | 0.23      | 2.04       | 0.51     | 8.48        | <0.01     | 22.84     | 28.40      | 25.07    | 37.89     |
| 160           | 218.91             | 24.69    | 0.03       | 1.79    | 5.79        | 0.14      | 1.49       | 0.50     | 8.37        | <0.01     | 19.65     | 24.10      | 22.89    | 33.24     |
| 170           | 261.87             | 24.19    | 0.03       | 1.79    | 3.60        | 0.08      | 1.12       | 0.51     | 8.59        | <0.01     | 15.29     | 20.19      | 22.42    | 30.17     |
| 180           | 301.86             | 24.32    | 0.03       | 1.83    | 3.83        | 0.09      | 1.15       | 0.52     | 8.72        | <0.01     | 18.13     | 23.04      | 22.03    | 31.88     |

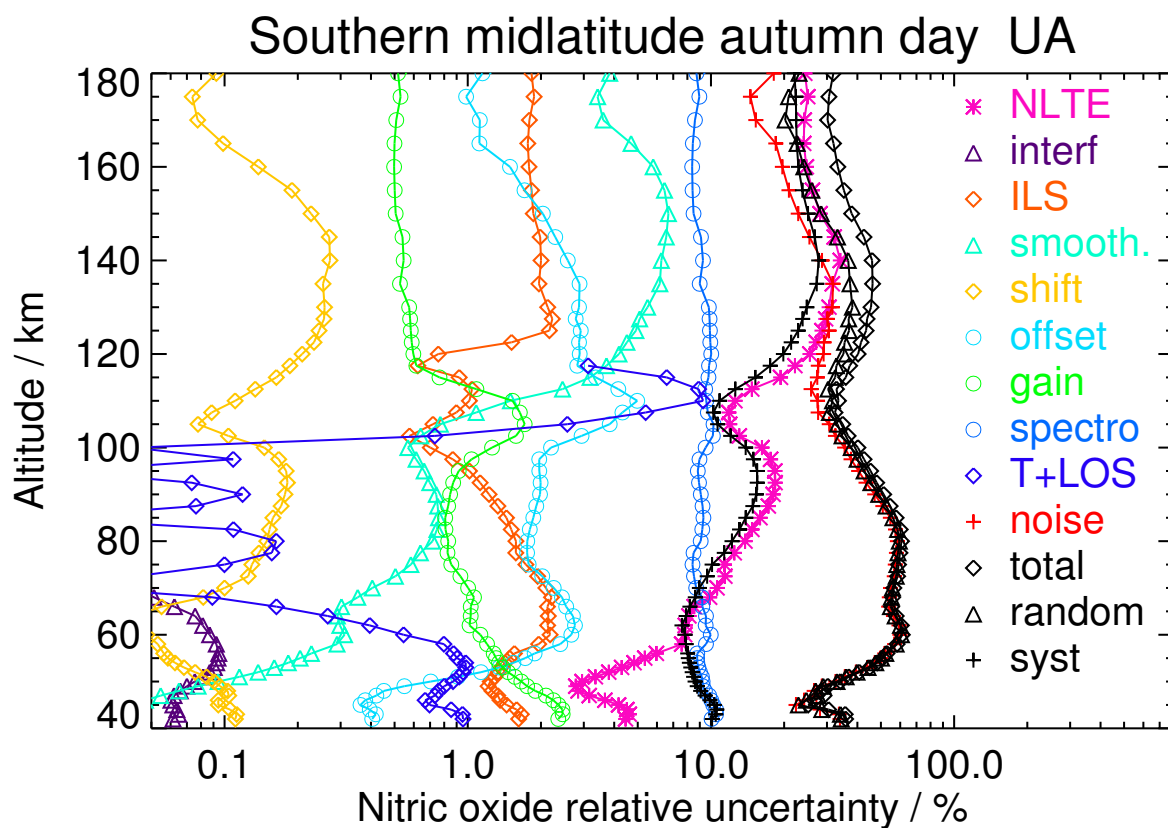

**Figure S161.** V8R\_NOwT\_662 Southern midlatitude autumn day, high solar activity

**Table S163.** Nitric oxide error budget for Southern midlatitude autumn night, high solar activity. All uncertainties are  $1\sigma$ .

| altitude (km) | mean target (ppmv) | NLTE (%) | interf (%) | ILS (%) | smooth. (%) | shift (%) | offset (%) | gain (%) | spectro (%) | T+LOS (%) | noise (%) | random (%) | syst (%) | total (%) |
|---------------|--------------------|----------|------------|---------|-------------|-----------|------------|----------|-------------|-----------|-----------|------------|----------|-----------|
| 50            | 0.00               | 0.45     | 0.20       | 0.89    | 0.08        | 0.18      | 1.15       | 0.21     | 8.62        | 1.34      | 65.01     | 65.04      | 8.67     | 65.61     |
| 60            | 0.01               | 5.91     | 0.10       | 0.99    | 0.22        | 0.11      | 2.16       | 1.75     | 11.51       | 1.12      | 56.41     | 57.49      | 7.36     | 57.96     |
| 70            | 0.06               | 6.13     | 0.04       | 1.51    | 0.17        | 0.26      | 1.67       | 2.11     | 10.74       | 0.11      | 38.23     | 39.49      | 8.01     | 40.30     |
| 80            | 0.12               | 15.02    | 0.08       | 1.10    | 0.69        | 0.33      | 3.86       | 1.79     | 11.29       | 0.19      | 57.79     | 60.15      | 9.71     | 60.93     |
| 90            | 0.90               | 21.08    | 0.07       | 0.87    | 0.97        | 0.46      | 3.86       | 2.20     | 11.25       | 0.41      | 51.44     | 55.73      | 11.53    | 56.91     |
| 100           | 7.25               | 21.34    | 0.06       | 0.94    | 1.04        | 0.32      | 6.53       | 2.56     | 10.63       | 0.68      | 46.65     | 51.58      | 11.63    | 52.88     |
| 110           | 39.92              | 41.65    | 0.04       | 2.23    | 1.89        | 0.22      | 13.67      | 3.33     | 10.09       | 12.95     | 32.85     | 55.40      | 14.84    | 57.35     |
| 120           | 59.23              | 49.51    | 0.04       | 0.90    | 4.26        | 0.21      | 2.85       | 0.70     | 11.84       | <0.01     | 28.37     | 55.20      | 19.42    | 58.51     |
| 130           | 62.12              | 39.75    | 0.04       | 2.46    | 4.65        | 0.53      | 2.69       | 0.67     | 11.37       | <0.01     | 27.36     | 45.27      | 21.09    | 49.94     |
| 140           | 77.37              | 33.60    | 0.06       | 2.19    | 5.32        | 0.31      | 2.83       | 0.62     | 10.50       | <0.01     | 28.68     | 39.47      | 23.34    | 45.86     |
| 150           | 80.02              | 32.35    | 0.10       | 2.25    | 5.35        | 0.22      | 2.03       | 0.64     | 10.78       | <0.01     | 25.21     | 36.00      | 23.24    | 42.85     |
| 160           | 86.61              | 33.14    | 0.10       | 2.40    | 5.12        | 0.09      | 1.79       | 0.66     | 11.32       | <0.01     | 23.90     | 36.07      | 23.07    | 42.82     |
| 170           | 90.17              | 30.30    | 0.10       | 2.32    | 4.45        | 0.07      | 2.04       | 0.63     | 10.81       | <0.01     | 26.55     | 35.42      | 22.69    | 42.06     |
| 180           | 89.83              | 31.07    | 0.11       | 2.29    | 4.77        | 0.08      | 2.28       | 0.63     | 10.85       | <0.01     | 32.46     | 40.56      | 22.93    | 46.59     |

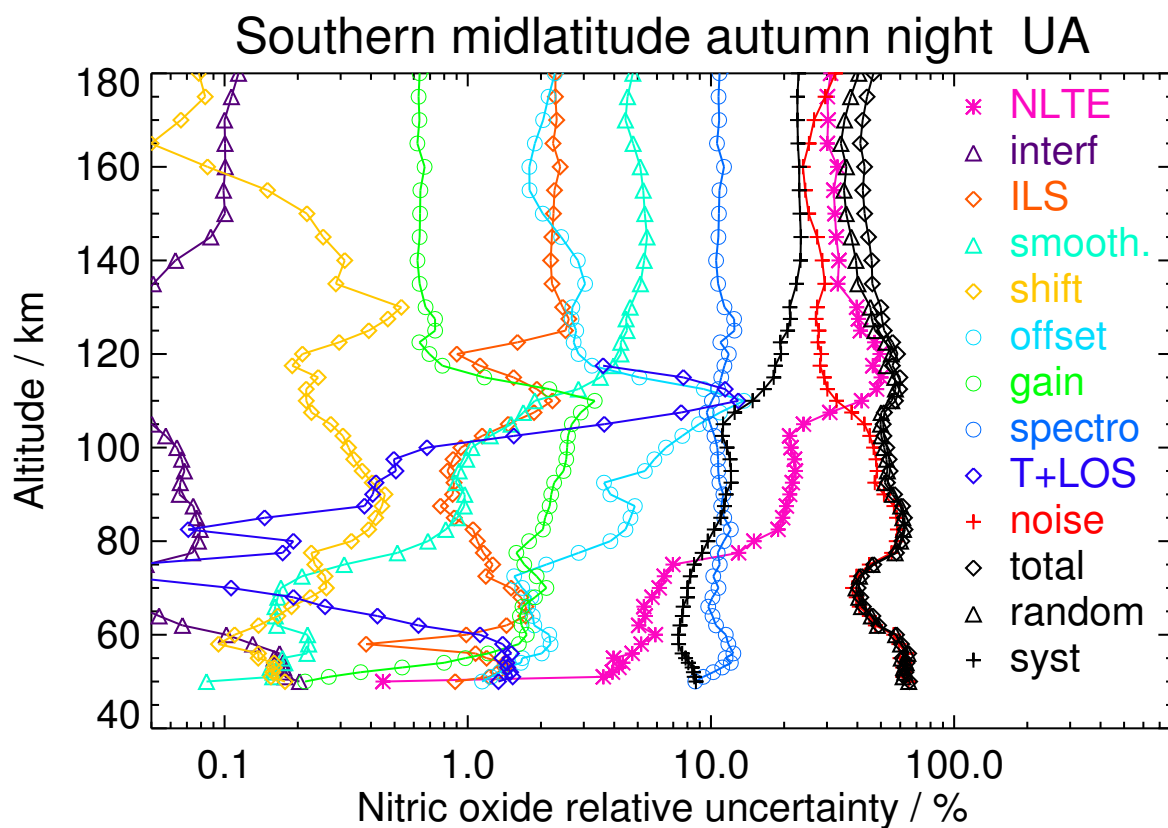

**Figure S162.** V8R\_NOwT\_662 Southern midlatitude autumn night, high solar activity

**Table S164.** Nitric oxide error budget for Southern polar winter day, high solar activity. All uncertainties are  $1\sigma$ .

| altitude (km) | mean target (ppmv) | NLTE (%) | interf (%) | ILS (%) | smooth. (%) | shift (%) | offset (%) | gain (%) | spectro (%) | T+LOS (%) | noise (%) | random (%) | syst (%) | total (%) |
|---------------|--------------------|----------|------------|---------|-------------|-----------|------------|----------|-------------|-----------|-----------|------------|----------|-----------|
| 50            | 0.01               | 2.05     | 0.10       | 1.09    | 0.04        | 0.09      | 0.40       | 1.46     | 8.29        | 0.63      | 27.34     | 27.58      | 8.00     | 28.72     |
| 60            | 0.01               | 4.64     | 0.08       | 1.63    | 0.11        | 0.07      | 2.05       | 0.93     | 8.53        | 0.47      | 46.44     | 47.01      | 6.98     | 47.53     |
| 70            | 0.04               | 6.44     | 0.03       | 2.05    | 0.20        | 0.12      | 2.89       | 0.84     | 7.39        | <0.01     | 47.16     | 47.75      | 7.30     | 48.31     |
| 80            | 0.22               | 7.47     | 0.01       | 1.31    | 0.24        | 0.12      | 1.77       | 1.05     | 8.31        | 0.16      | 37.02     | 37.75      | 8.76     | 38.75     |
| 90            | 2.16               | 17.58    | 0.02       | 0.98    | 0.33        | 0.11      | 2.97       | 1.63     | 8.88        | 0.02      | 31.34     | 34.47      | 13.94    | 37.18     |
| 100           | 10.54              | 18.13    | 0.02       | 0.95    | 0.45        | 0.16      | 2.35       | 1.23     | 8.70        | 0.49      | 30.15     | 33.57      | 13.98    | 36.36     |
| 110           | 57.73              | 10.58    | 0.02       | 0.99    | 1.36        | 0.10      | 6.65       | 1.17     | 10.09       | 12.50     | 25.12     | 30.85      | 9.91     | 32.40     |
| 120           | 104.72             | 25.08    | 0.04       | 1.05    | 3.67        | 0.25      | 2.53       | 0.54     | 9.02        | <0.01     | 25.57     | 30.80      | 20.91    | 37.23     |
| 130           | 137.78             | 30.89    | 0.04       | 2.04    | 4.52        | 0.34      | 2.42       | 0.57     | 9.57        | <0.01     | 26.87     | 34.63      | 24.48    | 42.41     |
| 140           | 144.42             | 29.63    | 0.05       | 2.01    | 5.62        | 0.30      | 2.44       | 0.54     | 9.10        | <0.01     | 27.79     | 33.76      | 25.20    | 42.13     |
| 150           | 172.28             | 26.08    | 0.09       | 1.88    | 5.90        | 0.21      | 2.02       | 0.52     | 8.72        | <0.01     | 24.52     | 28.92      | 23.75    | 37.42     |
| 160           | 215.85             | 26.14    | 0.08       | 1.93    | 5.10        | 0.14      | 1.52       | 0.55     | 9.26        | <0.01     | 21.30     | 26.95      | 23.00    | 35.43     |
| 170           | 251.48             | 25.82    | 0.07       | 1.95    | 3.98        | 0.11      | 1.41       | 0.56     | 9.34        | <0.01     | 18.79     | 24.79      | 22.68    | 33.60     |
| 180           | 265.96             | 25.93    | 0.07       | 1.98    | 4.35        | 0.12      | 1.64       | 0.56     | 9.43        | <0.01     | 24.60     | 29.72      | 22.56    | 37.31     |

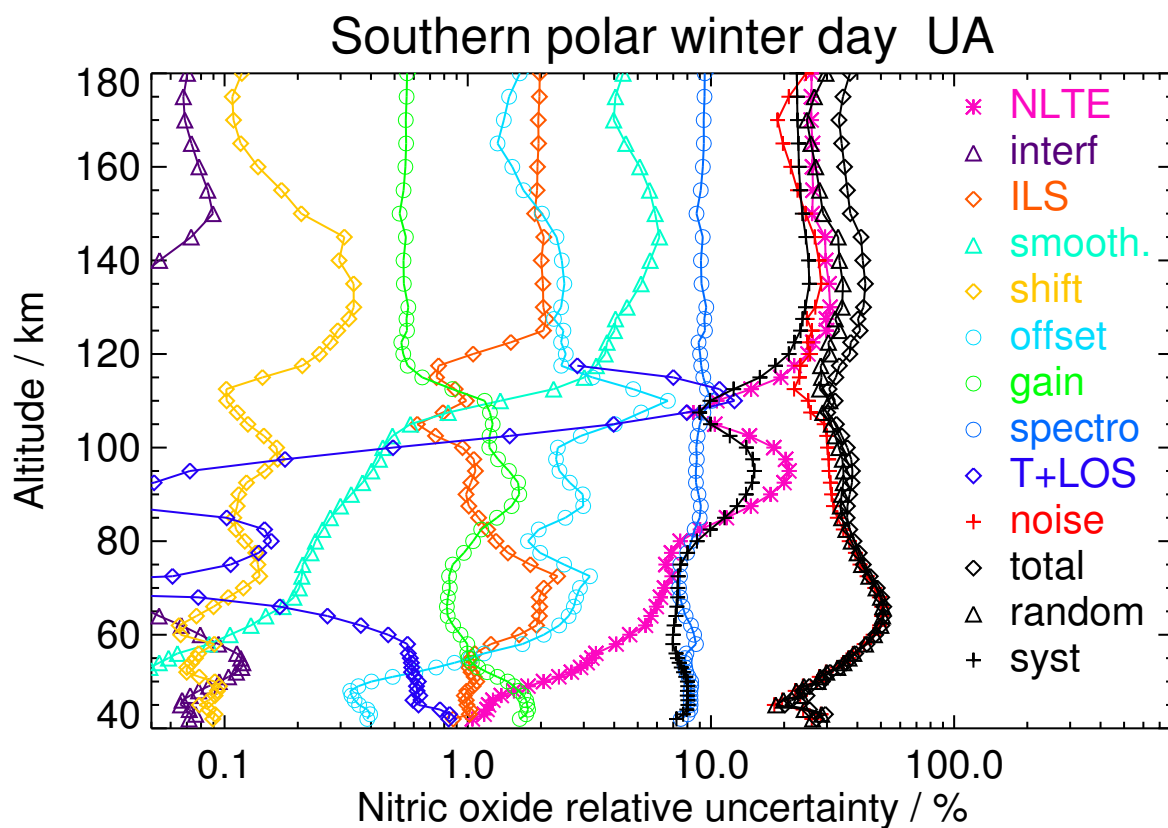

**Figure S163.** V8R\_NOwT\_662 Southern polar winter day, high solar activity



**Table S165.** Nitric oxide error budget for Southern polar winter night, high solar activity. All uncertainties are  $1\sigma$ .

| altitude (km) | mean target (ppmv) | NLTE (%) | interf (%) | ILS (%) | smooth. (%) | shift (%) | offset (%) | gain (%) | spectro (%) | T+LOS (%) | noise (%) | random (%) | syst (%) | total (%) |
|---------------|--------------------|----------|------------|---------|-------------|-----------|------------|----------|-------------|-----------|-----------|------------|----------|-----------|
| 50            | 0.01               | 8.44     | 0.10       | 1.81    | 0.07        | 0.49      | 3.10       | 2.94     | 21.34       | 2.06      | 37.46     | 43.17      | 9.62     | 44.23     |
| 60            | 0.02               | 12.37    | 0.08       | 1.26    | 0.10        | 0.32      | 4.62       | 6.70     | 22.62       | 1.93      | 41.78     | 49.03      | 8.81     | 49.82     |
| 70            | 0.19               | 24.42    | 0.07       | 2.69    | 0.20        | 0.33      | 5.24       | 2.32     | 13.32       | 1.27      | 44.95     | 52.11      | 10.99    | 53.25     |
| 80            | 1.31               | 15.47    | 0.03       | 1.69    | 0.28        | 0.38      | 4.67       | 2.51     | 10.94       | 0.62      | 39.68     | 43.51      | 8.49     | 44.33     |
| 90            | 9.88               | 20.00    | 0.03       | 1.13    | 0.35        | 0.44      | 4.13       | 2.21     | 7.96        | 1.89      | 41.65     | 46.26      | 9.20     | 47.17     |
| 100           | 35.39              | 30.94    | 0.04       | 4.69    | 0.35        | 0.89      | 17.87      | 6.63     | 12.19       | 2.67      | 33.91     | 50.56      | 9.65     | 51.47     |
| 110           | 104.26             | 17.20    | 0.02       | 1.53    | 1.58        | 0.16      | 9.33       | 1.92     | 9.51        | 21.28     | 26.79     | 37.19      | 16.40    | 40.65     |
| 120           | 188.33             | 29.53    | 0.01       | 0.80    | 2.99        | 0.24      | 2.36       | 0.56     | 8.76        | <0.01     | 25.19     | 32.02      | 23.96    | 39.99     |
| 130           | 229.57             | 28.28    | <0.01      | 1.89    | 3.80        | 0.33      | 1.98       | 0.52     | 8.36        | <0.01     | 23.95     | 29.15      | 24.82    | 38.28     |
| 140           | 225.00             | 29.40    | 0.01       | 1.97    | 5.12        | 0.34      | 2.11       | 0.52     | 8.45        | <0.01     | 25.55     | 31.23      | 25.46    | 40.29     |
| 150           | 247.11             | 27.49    | 0.02       | 1.99    | 6.36        | 0.34      | 2.00       | 0.52     | 8.44        | <0.01     | 24.06     | 29.64      | 24.00    | 38.14     |
| 160           | 243.34             | 25.76    | 0.02       | 2.02    | 6.45        | 0.34      | 1.73       | 0.53     | 8.60        | <0.01     | 22.63     | 27.75      | 22.99    | 36.04     |
| 170           | 277.84             | 25.64    | 0.01       | 2.03    | 5.57        | 0.26      | 1.69       | 0.54     | 8.93        | <0.01     | 21.72     | 26.90      | 22.87    | 35.31     |
| 180           | 293.91             | 26.34    | 0.01       | 2.07    | 6.25        | 0.26      | 1.91       | 0.57     | 9.28        | <0.01     | 27.73     | 32.59      | 23.11    | 39.96     |

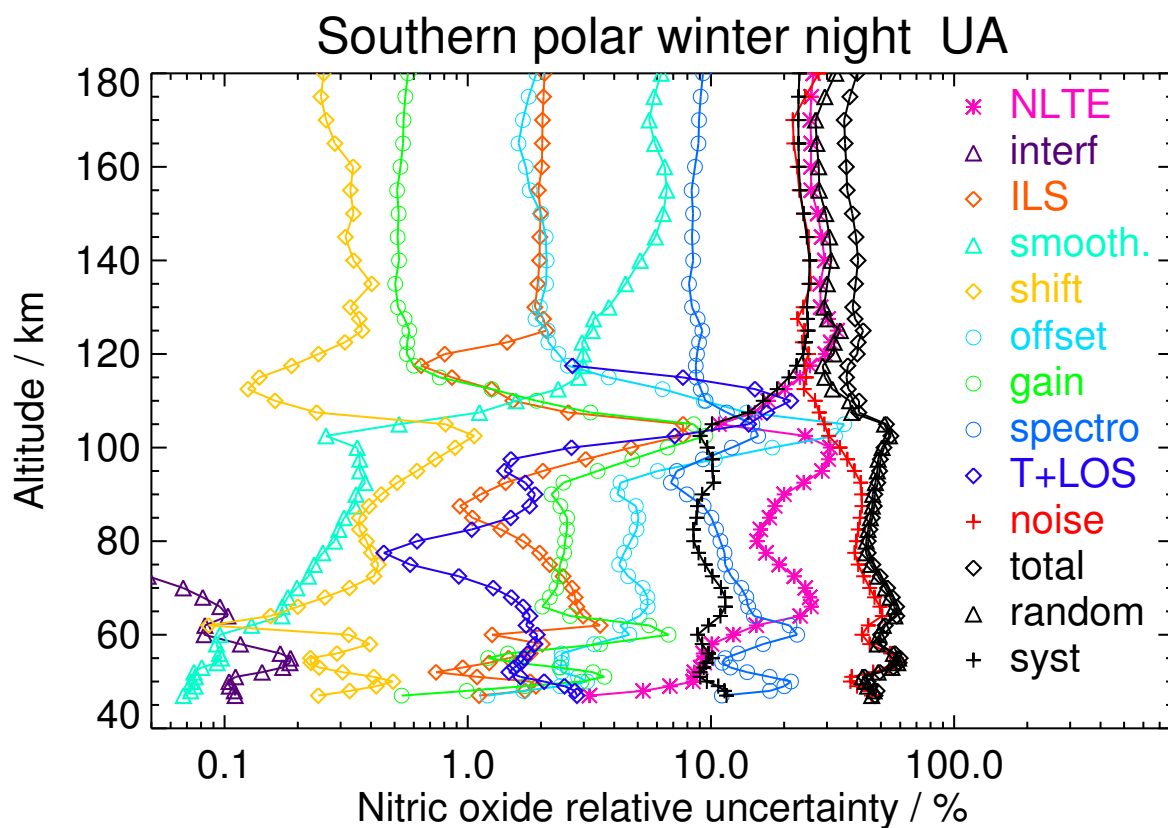

**Figure S164.** V8R\_NOwT\_662 Southern polar winter night, high solar activity

**Table S166.** Nitric oxide error budget for Southern polar spring day, high solar activity. All uncertainties are  $1\sigma$ .

| altitude (km) | mean target (ppmv) | NLTE (%) | interf (%) | ILS (%) | smooth. (%) | shift (%) | offset (%) | gain (%) | spectro (%) | T+LOS (%) | noise (%) | random (%) | syst (%) | total (%) |
|---------------|--------------------|----------|------------|---------|-------------|-----------|------------|----------|-------------|-----------|-----------|------------|----------|-----------|
| 50            | 0.01               | 4.19     | 0.10       | 1.35    | 0.03        | 0.09      | 0.61       | 1.11     | 8.67        | 0.72      | 25.63     | 26.11      | 8.48     | 27.45     |
| 60            | 0.01               | 15.68    | 0.11       | 3.36    | 0.14        | 0.39      | 2.15       | 0.91     | 12.80       | 1.41      | 45.64     | 48.78      | 11.51    | 50.12     |
| 70            | 0.06               | 11.52    | 0.06       | 5.47    | 0.17        | 0.49      | 3.07       | 0.81     | 9.05        | 0.10      | 43.54     | 44.84      | 11.85    | 46.38     |
| 80            | 0.16               | 9.94     | 0.07       | 1.62    | 0.16        | 0.50      | 1.79       | 1.08     | 9.19        | 0.25      | 32.93     | 34.77      | 8.14     | 35.71     |
| 90            | 1.52               | 21.90    | 0.10       | 2.73    | 0.31        | 0.84      | 3.45       | 1.08     | 9.01        | <0.01     | 34.43     | 39.44      | 14.56    | 42.04     |
| 100           | 13.13              | 24.60    | 0.14       | 1.49    | 0.44        | 1.27      | 3.76       | 0.99     | 9.24        | 0.76      | 35.57     | 42.16      | 14.06    | 44.44     |
| 110           | 55.22              | 26.17    | 0.05       | 2.98    | 0.61        | 0.28      | 5.47       | 1.27     | 8.60        | 13.64     | 21.07     | 30.00      | 23.03    | 37.82     |
| 120           | 145.12             | 36.57    | 0.05       | 0.62    | 1.48        | 0.31      | 1.18       | 0.48     | 8.32        | <0.01     | 17.10     | 26.94      | 31.26    | 41.27     |
| 130           | 241.95             | 26.24    | 0.07       | 1.82    | 1.79        | 0.30      | 0.74       | 0.48     | 8.14        | <0.01     | 14.99     | 19.67      | 24.49    | 31.41     |
| 140           | 271.45             | 27.67    | 0.15       | 1.68    | 2.33        | 0.32      | 0.78       | 0.50     | 8.31        | <0.01     | 14.30     | 19.70      | 25.70    | 32.38     |
| 150           | 310.63             | 27.51    | 0.11       | 1.69    | 2.85        | 0.25      | 0.87       | 0.50     | 8.36        | <0.01     | 11.85     | 18.94      | 24.92    | 31.30     |
| 160           | 377.60             | 26.86    | 0.08       | 1.66    | 2.70        | 0.09      | 0.86       | 0.50     | 8.47        | <0.01     | 11.38     | 18.43      | 24.37    | 30.55     |
| 170           | 443.38             | 26.84    | 0.05       | 1.62    | 1.98        | 0.05      | 0.99       | 0.49     | 8.41        | <0.01     | 12.99     | 18.86      | 24.74    | 31.11     |
| 180           | 582.30             | 27.57    | 0.06       | 1.79    | 1.06        | 0.05      | 0.54       | 0.51     | 8.75        | <0.01     | 7.33      | 17.14      | 24.53    | 29.93     |

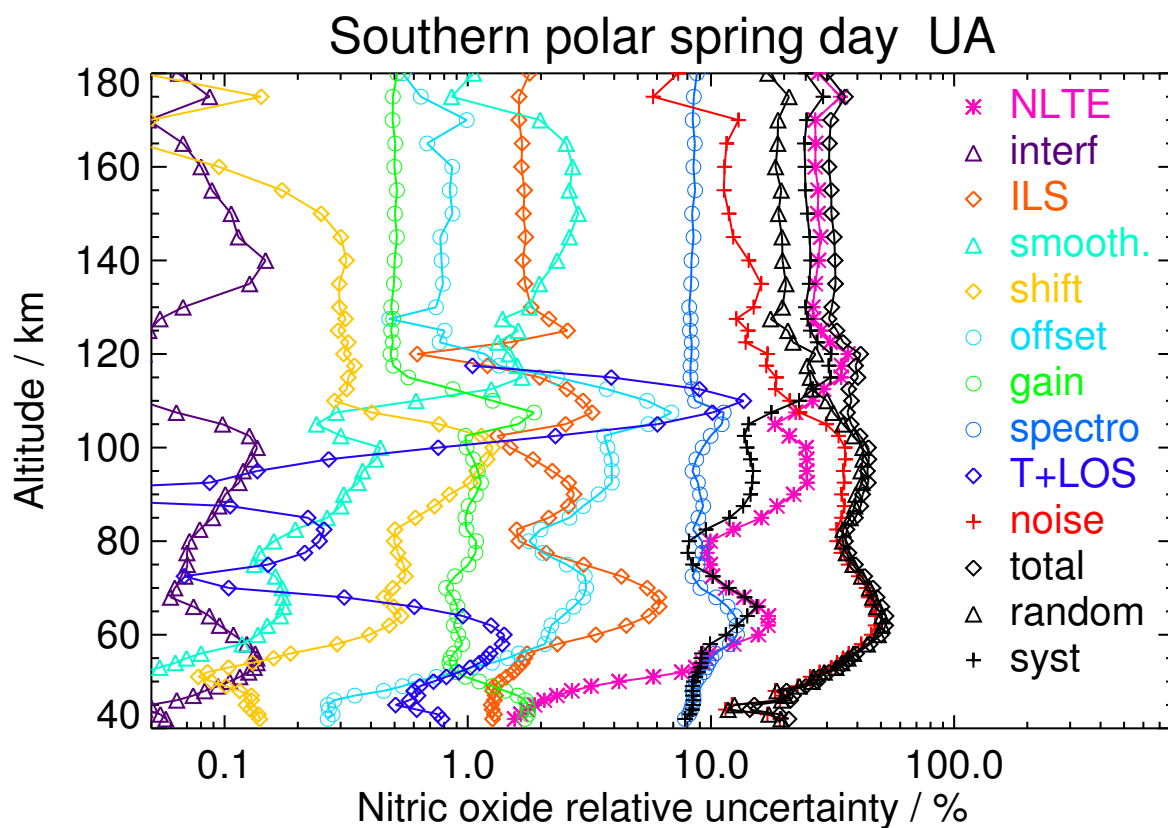

**Figure S165.** V8R\_NOwT\_662 Southern polar spring day, high solar activity

**Table S167.** Nitric oxide error budget for Southern polar spring night, high solar activity. All uncertainties are  $1\sigma$ .

| altitude (km) | mean target (ppmv) | NLTE (%) | interf (%) | ILS (%) | smooth. (%) | shift (%) | offset (%) | gain (%) | spectro (%) | T+LOS (%) | noise (%) | random (%) | syst (%) | total (%) |
|---------------|--------------------|----------|------------|---------|-------------|-----------|------------|----------|-------------|-----------|-----------|------------|----------|-----------|
| 60            | 0.01               | 20.59    | 0.12       | 3.38    | 0.21        | 0.24      | 5.17       | 1.04     | 11.95       | 1.75      | 46.67     | 52.01      | 9.08     | 52.80     |
| 70            | 0.12               | 17.57    | 0.04       | 1.59    | 0.20        | 0.50      | 4.10       | 2.09     | 13.89       | 0.14      | 39.74     | 45.03      | 8.83     | 45.88     |
| 80            | 0.27               | 24.52    | 0.06       | 2.16    | 0.46        | 0.67      | 4.97       | 1.85     | 16.32       | 0.25      | 47.07     | 54.00      | 14.18    | 55.83     |
| 90            | 1.72               | 17.71    | 0.09       | 1.60    | 0.42        | 0.87      | 5.53       | 1.32     | 8.09        | 0.16      | 49.73     | 53.30      | 6.90     | 53.74     |
| 100           | 13.75              | 25.29    | 0.07       | 2.91    | 0.53        | 0.90      | 9.10       | 2.30     | 6.15        | 0.81      | 45.00     | 52.52      | 6.52     | 52.92     |
| 110           | 59.99              | 26.73    | 0.04       | 2.13    | 1.16        | 0.43      | 6.19       | 1.55     | 11.03       | 13.76     | 27.82     | 38.22      | 19.64    | 42.97     |
| 120           | 116.35             | 42.83    | 0.03       | 1.20    | 2.05        | 0.27      | 1.63       | 0.61     | 10.20       | <0.01     | 20.41     | 40.03      | 27.59    | 48.62     |
| 130           | 163.90             | 32.84    | 0.03       | 2.05    | 2.48        | 0.37      | 1.14       | 0.59     | 9.69        | <0.01     | 18.07     | 30.41      | 24.21    | 38.87     |
| 140           | 182.71             | 37.70    | 0.10       | 2.20    | 3.37        | 0.43      | 1.16       | 0.65     | 10.61       | <0.01     | 18.73     | 34.89      | 26.18    | 43.62     |
| 150           | 194.10             | 34.18    | 0.09       | 2.15    | 4.18        | 0.37      | 1.27       | 0.62     | 10.07       | <0.01     | 16.87     | 30.76      | 25.15    | 39.73     |
| 160           | 197.74             | 31.19    | 0.10       | 2.05    | 3.96        | 0.13      | 1.12       | 0.58     | 9.81        | <0.01     | 16.28     | 27.77      | 24.18    | 36.82     |
| 170           | 232.14             | 29.40    | 0.08       | 2.05    | 2.73        | 0.05      | 1.09       | 0.56     | 9.45        | <0.01     | 15.05     | 24.97      | 23.88    | 34.55     |
| 180           | 264.84             | 32.56    | 0.09       | 2.10    | 2.40        | 0.04      | 0.99       | 0.60     | 10.19       | <0.01     | 15.25     | 27.81      | 25.20    | 37.53     |

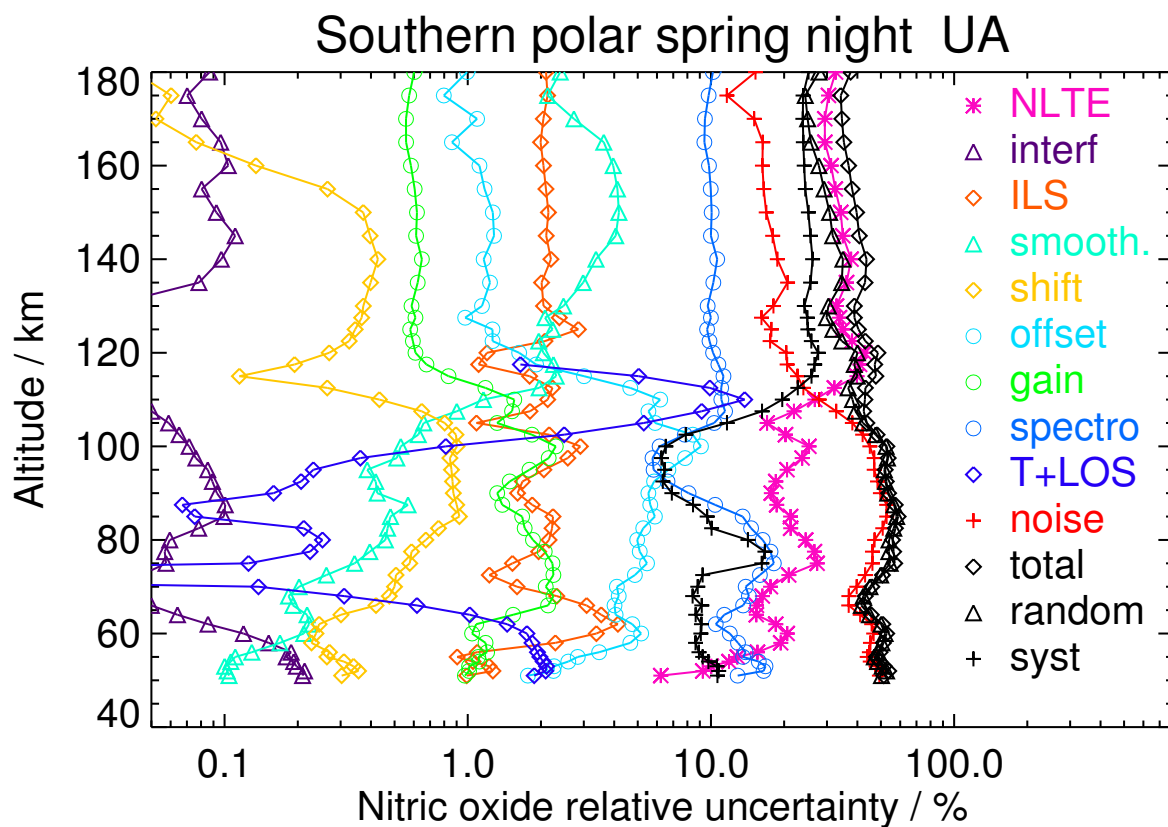

**Figure S166.** V8R\_NOwT\_662 Southern polar spring night, high solar activity

**Table S168.** Nitric oxide error budget for Southern polar summer day, high solar activity. All uncertainties are  $1\sigma$ .

| altitude (km) | mean target (ppmv) | NLTE (%) | interf (%) | ILS (%) | smooth. (%) | shift (%) | offset (%) | gain (%) | spectro (%) | T+LOS (%) | noise (%) | random (%) | syst (%) | total (%) |
|---------------|--------------------|----------|------------|---------|-------------|-----------|------------|----------|-------------|-----------|-----------|------------|----------|-----------|
| 50            | 0.01               | 1.70     | 0.05       | 0.94    | 0.01        | 0.12      | 0.42       | 1.14     | 8.26        | 0.76      | 14.75     | 14.95      | 8.26     | 17.08     |
| 60            | 0.01               | 9.11     | 0.11       | 2.76    | 0.07        | 0.33      | 2.66       | 0.90     | 10.38       | 1.17      | 34.47     | 36.33      | 8.73     | 37.36     |
| 70            | 0.06               | 11.26    | 0.05       | 3.49    | 0.13        | 0.59      | 5.12       | 1.69     | 10.29       | 0.14      | 31.72     | 34.48      | 9.56     | 35.78     |
| 80            | 0.17               | 11.73    | 0.04       | 2.01    | 0.15        | 0.47      | 2.78       | 0.89     | 8.56        | 0.27      | 27.75     | 30.25      | 8.88     | 31.52     |
| 90            | 1.45               | 17.78    | 0.06       | 0.86    | 0.23        | 0.94      | 3.16       | 0.96     | 10.27       | 0.25      | 29.01     | 32.55      | 14.72    | 35.72     |
| 100           | 18.02              | 13.54    | 0.07       | 2.73    | 0.21        | 1.05      | 4.49       | 1.78     | 10.05       | 6.24      | 30.89     | 35.01      | 9.16     | 36.18     |
| 110           | 44.23              | 24.60    | 0.03       | 3.46    | 0.41        | 0.29      | 4.74       | 1.33     | 8.24        | 13.08     | 15.57     | 25.21      | 22.07    | 33.51     |
| 120           | 117.67             | 33.46    | 0.06       | 1.71    | 1.53        | 0.13      | 1.37       | 0.47     | 8.34        | <0.01     | 17.66     | 25.38      | 29.40    | 38.84     |
| 130           | 244.11             | 28.44    | 0.08       | 1.86    | 2.03        | 0.28      | 0.94       | 0.50     | 8.51        | <0.01     | 17.40     | 23.21      | 25.58    | 34.54     |
| 140           | 378.64             | 27.74    | 0.14       | 1.81    | 2.67        | 0.56      | 0.89       | 0.49     | 7.97        | <0.01     | 16.39     | 21.37      | 25.63    | 33.37     |
| 150           | 454.89             | 26.46    | 0.16       | 1.71    | 3.50        | 0.42      | 0.98       | 0.48     | 7.75        | <0.01     | 13.54     | 17.58      | 25.52    | 30.99     |
| 160           | 524.77             | 25.57    | 0.06       | 1.65    | 3.45        | 0.17      | 0.95       | 0.48     | 7.91        | <0.01     | 12.72     | 16.85      | 24.70    | 29.90     |
| 170           | 620.49             | 26.09    | 0.03       | 1.67    | 2.48        | 0.05      | 1.00       | 0.48     | 8.22        | <0.01     | 13.51     | 18.13      | 24.74    | 30.67     |
| 180           | 781.92             | 26.43    | 0.04       | 1.77    | 1.40        | 0.05      | 0.58       | 0.50     | 8.39        | <0.01     | 8.26      | 15.46      | 24.57    | 29.03     |

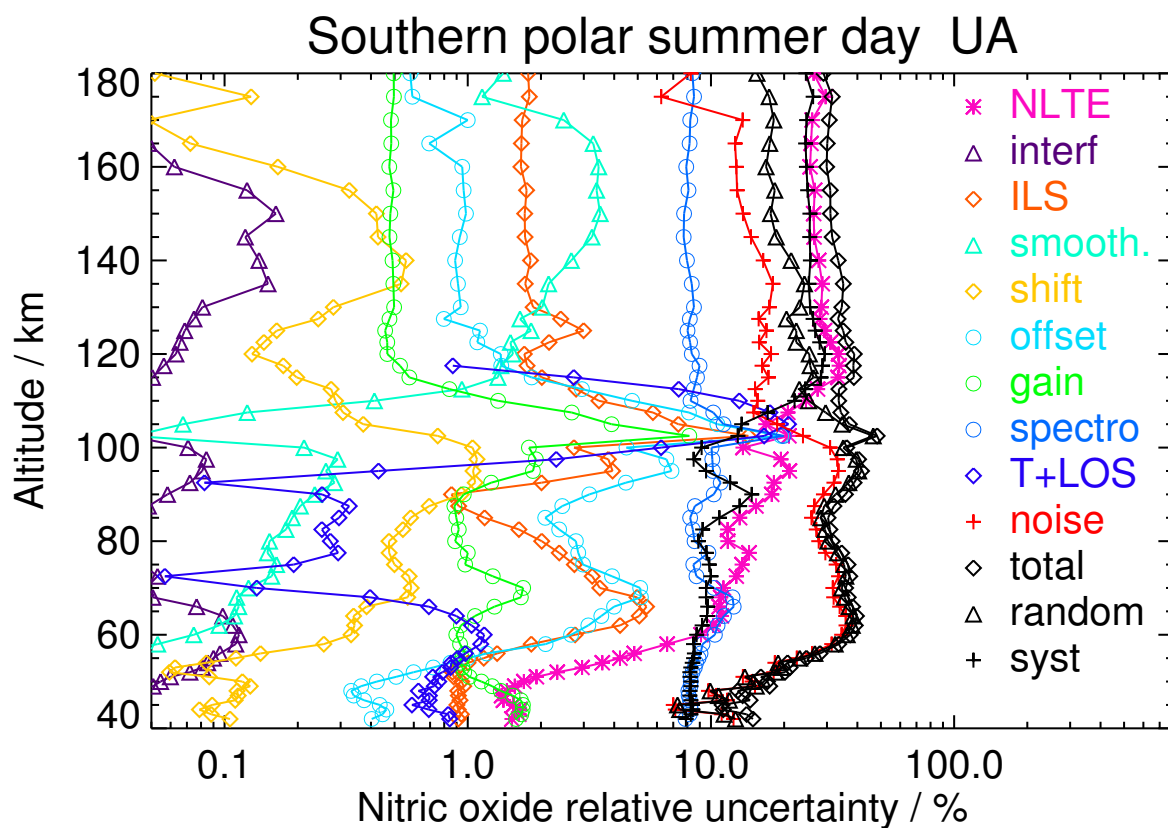

**Figure S167.** V8R\_NOwT\_662 Southern polar summer day, high solar activity

**Table S169.** Nitric oxide error budget for Southern polar summer night, high solar activity. All uncertainties are  $1\sigma$ .

| altitude (km) | mean target (ppmv) | NLTE (%) | interf (%) | ILS (%) | smooth. (%) | shift (%) | offset (%) | gain (%) | spectro (%) | T+LOS (%) | noise (%) | random (%) | syst (%) | total (%) |
|---------------|--------------------|----------|------------|---------|-------------|-----------|------------|----------|-------------|-----------|-----------|------------|----------|-----------|
| 50            | 0.00               | 2.36     | 0.17       | 1.94    | 0.10        | 0.36      | 1.29       | 0.78     | 13.27       | 2.27      | 41.98     | 42.07      | 13.64    | 44.22     |
| 60            | 0.01               | 11.38    | 0.11       | 3.21    | 0.19        | 0.18      | 1.79       | 1.22     | 12.60       | 1.72      | 41.77     | 44.57      | 8.02     | 45.29     |
| 70            | 0.08               | 15.59    | 0.07       | 2.63    | 0.14        | 0.38      | 2.22       | 0.76     | 4.70        | 0.11      | 39.84     | 41.48      | 12.05    | 43.19     |
| 80            | 0.28               | 13.32    | 0.07       | 1.59    | 0.28        | 0.46      | 3.65       | 1.23     | 6.18        | 0.25      | 37.65     | 38.24      | 13.73    | 40.63     |
| 90            | 1.16               | 26.93    | 0.09       | 2.31    | 0.66        | 0.96      | 5.20       | 2.13     | 11.23       | <0.01     | 41.99     | 49.90      | 12.75    | 51.51     |
| 100           | 10.29              | 13.26    | 0.11       | 1.49    | 0.63        | 1.03      | 4.70       | 1.26     | 8.55        | 3.29      | 41.80     | 44.50      | 7.31     | 45.10     |
| 110           | 51.51              | 21.48    | 0.06       | 1.92    | 1.15        | 0.57      | 5.19       | 1.26     | 7.83        | 14.49     | 23.64     | 33.30      | 14.71    | 36.40     |
| 120           | 98.94              | 47.84    | 0.05       | 1.01    | 2.76        | 0.67      | 2.21       | 0.59     | 10.24       | <0.01     | 23.27     | 46.13      | 28.66    | 54.31     |
| 130           | 153.74             | 36.04    | 0.05       | 2.39    | 3.19        | 0.34      | 1.71       | 0.60     | 10.14       | <0.01     | 21.97     | 34.83      | 26.27    | 43.63     |
| 140           | 189.07             | 40.11    | 0.10       | 2.14    | 4.08        | 0.44      | 1.57       | 0.63     | 10.61       | <0.01     | 21.86     | 37.77      | 28.23    | 47.16     |
| 150           | 218.36             | 33.46    | 0.09       | 2.07    | 4.77        | 0.33      | 1.46       | 0.57     | 9.32        | <0.01     | 18.82     | 30.03      | 26.24    | 39.88     |
| 160           | 263.65             | 30.23    | 0.07       | 1.91    | 4.32        | 0.15      | 1.19       | 0.53     | 8.93        | <0.01     | 16.75     | 25.84      | 25.11    | 36.03     |
| 170           | 317.69             | 30.57    | 0.06       | 1.96    | 2.92        | 0.10      | 1.17       | 0.54     | 9.13        | <0.01     | 15.77     | 25.53      | 25.08    | 35.79     |
| 180           | 365.41             | 32.36    | 0.07       | 2.00    | 2.68        | 0.13      | 1.03       | 0.56     | 9.52        | <0.01     | 14.96     | 26.96      | 25.45    | 37.07     |

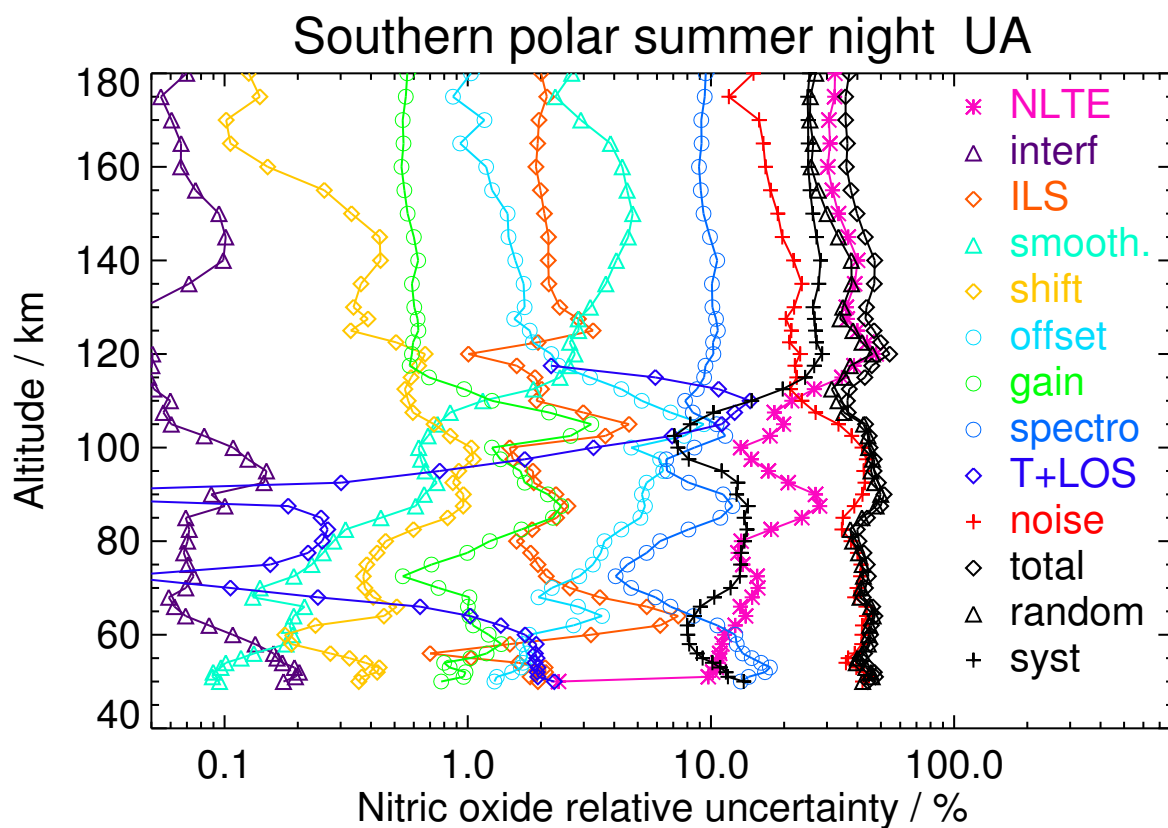

**Figure S168.** V8R\_NOwT\_662 Southern polar summer night, high solar activity

**Table S170.** Nitric oxide error budget for Southern polar autumn day, high solar activity. All uncertainties are  $1\sigma$ .

| altitude (km) | mean target (ppmv) | NLTE (%) | interf (%) | ILS (%) | smooth. (%) | shift (%) | offset (%) | gain (%) | spectro (%) | T+LOS (%) | noise (%) | random (%) | syst (%) | total (%) |
|---------------|--------------------|----------|------------|---------|-------------|-----------|------------|----------|-------------|-----------|-----------|------------|----------|-----------|
| 50            | 0.00               | 4.95     | 0.12       | 1.26    | 0.15        | 0.06      | 1.50       | 1.57     | 8.84        | 1.18      | 46.16     | 46.73      | 7.59     | 47.34     |
| 60            | 0.01               | 8.82     | 0.10       | 2.37    | 0.22        | 0.07      | 3.67       | 0.98     | 10.04       | 0.90      | 58.92     | 60.11      | 7.64     | 60.59     |
| 70            | 0.03               | 8.91     | 0.05       | 2.43    | 0.27        | 0.10      | 5.01       | 0.94     | 9.79        | 0.05      | 53.33     | 54.55      | 8.71     | 55.24     |
| 80            | 0.17               | 12.81    | 0.02       | 2.30    | 0.34        | 0.16      | 6.14       | 1.37     | 12.84       | 0.23      | 42.98     | 46.25      | 9.07     | 47.13     |
| 90            | 2.18               | 18.22    | 0.02       | 1.43    | 0.40        | 0.25      | 5.01       | 1.45     | 10.97       | 0.18      | 33.16     | 37.46      | 13.36    | 39.77     |
| 100           | 18.82              | 23.70    | 0.02       | 1.18    | 0.43        | 0.27      | 4.42       | 1.42     | 10.05       | 0.04      | 27.99     | 35.01      | 15.61    | 38.33     |
| 110           | 77.72              | 10.96    | <0.01      | 0.70    | 0.85        | 0.06      | 5.60       | 1.27     | 9.74        | 9.48      | 21.93     | 26.64      | 10.50    | 28.63     |
| 120           | 120.21             | 26.46    | 0.01       | 1.11    | 3.06        | 0.25      | 2.26       | 0.55     | 9.06        | <0.01     | 25.22     | 31.40      | 21.17    | 37.87     |
| 130           | 119.69             | 28.28    | 0.02       | 2.06    | 4.40        | 0.33      | 2.17       | 0.53     | 8.88        | <0.01     | 26.01     | 31.77      | 23.96    | 39.80     |
| 140           | 121.17             | 30.46    | 0.03       | 1.98    | 6.27        | 0.28      | 2.59       | 0.53     | 8.89        | <0.01     | 29.31     | 35.21      | 26.01    | 43.77     |
| 150           | 133.84             | 25.98    | 0.05       | 1.79    | 6.76        | 0.19      | 2.12       | 0.49     | 8.25        | <0.01     | 24.97     | 29.29      | 23.71    | 37.68     |
| 160           | 167.31             | 25.18    | 0.05       | 1.87    | 6.13        | 0.18      | 1.58       | 0.51     | 8.62        | <0.01     | 21.27     | 26.54      | 22.36    | 34.71     |
| 170           | 224.96             | 26.02    | 0.04       | 2.08    | 4.47        | 0.21      | 1.38       | 0.55     | 9.29        | <0.01     | 17.49     | 24.77      | 21.96    | 33.11     |
| 180           | 280.11             | 27.78    | 0.04       | 2.38    | 4.79        | 0.29      | 1.47       | 0.61     | 10.07       | <0.01     | 20.21     | 29.07      | 21.62    | 36.23     |

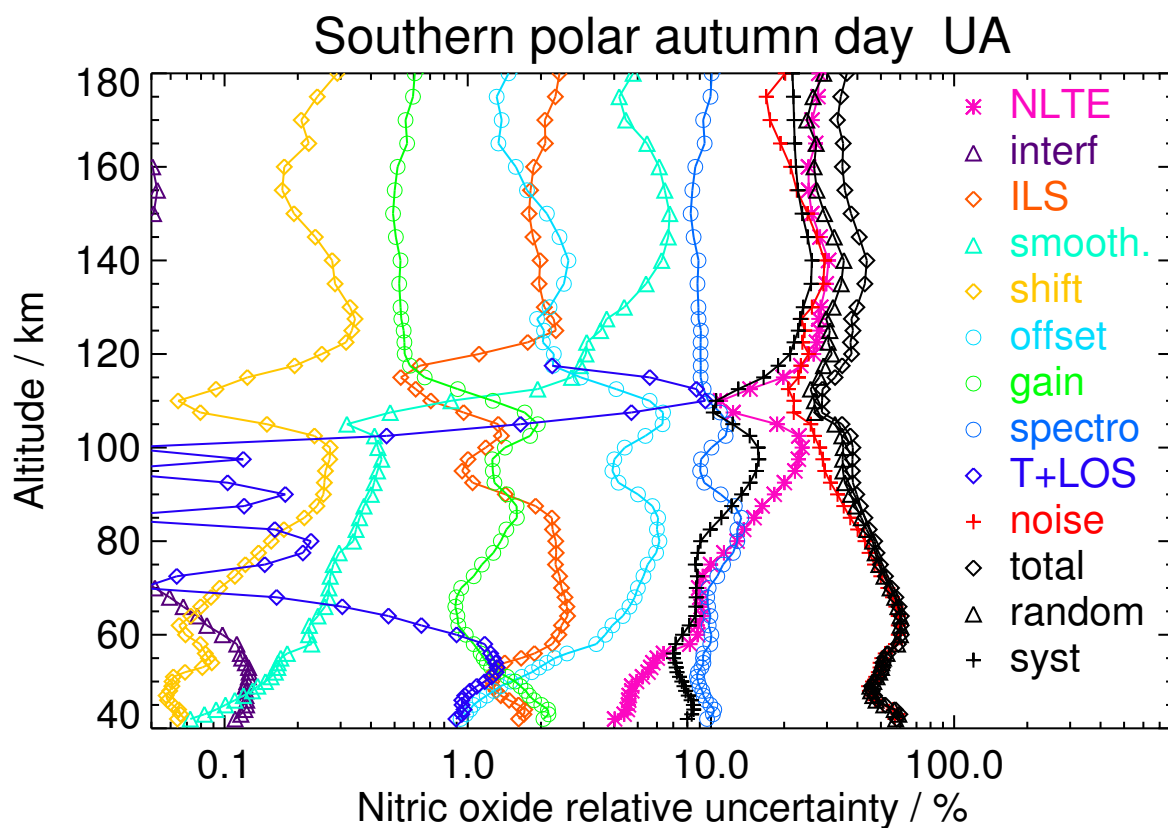

**Figure S169.** V8R\_NOwT\_662 Southern polar autumn day, high solar activity

**Table S171.** Nitric oxide error budget for Southern polar autumn night, high solar activity. All uncertainties are  $1\sigma$ .

| altitude (km) | mean target (ppmv) | NLTE (%) | interf (%) | ILS (%) | smooth. (%) | shift (%) | offset (%) | gain (%) | spectro (%) | T+LOS (%) | noise (%) | random (%) | syst (%) | total (%) |
|---------------|--------------------|----------|------------|---------|-------------|-----------|------------|----------|-------------|-----------|-----------|------------|----------|-----------|
| 50            | 0.00               | 4.06     | 0.17       | 0.29    | 0.14        | 0.14      | 1.27       | 0.36     | 8.49        | 1.30      | 64.51     | 64.67      | 8.46     | 65.22     |
| 60            | 0.01               | 9.73     | 0.14       | 1.94    | 0.22        | 0.11      | 2.92       | 0.99     | 10.73       | 1.54      | 61.26     | 62.18      | 10.59    | 63.07     |
| 70            | 0.13               | 8.41     | 0.05       | 3.22    | 0.22        | 0.26      | 3.52       | 3.57     | 11.92       | 0.70      | 41.41     | 43.44      | 8.74     | 44.31     |
| 80            | 0.67               | 14.08    | 0.03       | 2.17    | 0.35        | 0.18      | 6.38       | 3.22     | 13.96       | 0.40      | 41.65     | 45.43      | 10.95    | 46.74     |
| 90            | 6.05               | 13.28    | 0.03       | 0.90    | 0.44        | 0.27      | 11.97      | 4.91     | 15.22       | 2.84      | 39.48     | 45.04      | 10.72    | 46.30     |
| 100           | 18.81              | 9.56     | 0.03       | 1.43    | 0.70        | 0.35      | 8.17       | 3.35     | 9.62        | 1.26      | 40.43     | 42.50      | 9.75     | 43.60     |
| 110           | 58.22              | 19.47    | 0.03       | 1.05    | 1.94        | 0.21      | 7.35       | 1.91     | 9.69        | 13.50     | 30.67     | 37.80      | 15.15    | 40.73     |
| 120           | 108.25             | 27.49    | 0.02       | 0.64    | 3.50        | 0.18      | 2.37       | 0.50     | 8.28        | <0.01     | 26.18     | 31.97      | 22.48    | 39.09     |
| 130           | 160.13             | 28.55    | 0.01       | 1.80    | 3.51        | 0.30      | 1.82       | 0.53     | 8.84        | <0.01     | 22.40     | 29.55      | 23.26    | 37.61     |
| 140           | 150.85             | 34.45    | 0.03       | 2.01    | 5.04        | 0.30      | 2.00       | 0.58     | 9.69        | <0.01     | 25.15     | 36.16      | 25.29    | 44.13     |
| 150           | 144.47             | 29.79    | 0.05       | 2.04    | 5.99        | 0.28      | 1.86       | 0.56     | 9.31        | <0.01     | 22.88     | 31.62      | 23.27    | 39.26     |
| 160           | 142.93             | 26.21    | 0.06       | 1.96    | 5.51        | 0.14      | 1.49       | 0.53     | 9.00        | <0.01     | 21.06     | 27.70      | 21.92    | 35.33     |
| 170           | 139.99             | 25.12    | 0.05       | 1.96    | 4.18        | 0.06      | 1.47       | 0.54     | 9.06        | <0.01     | 20.03     | 25.68      | 21.88    | 33.74     |
| 180           | 137.39             | 25.93    | 0.06       | 2.01    | 4.44        | 0.07      | 1.77       | 0.55     | 9.35        | <0.01     | 26.76     | 31.47      | 22.64    | 38.77     |

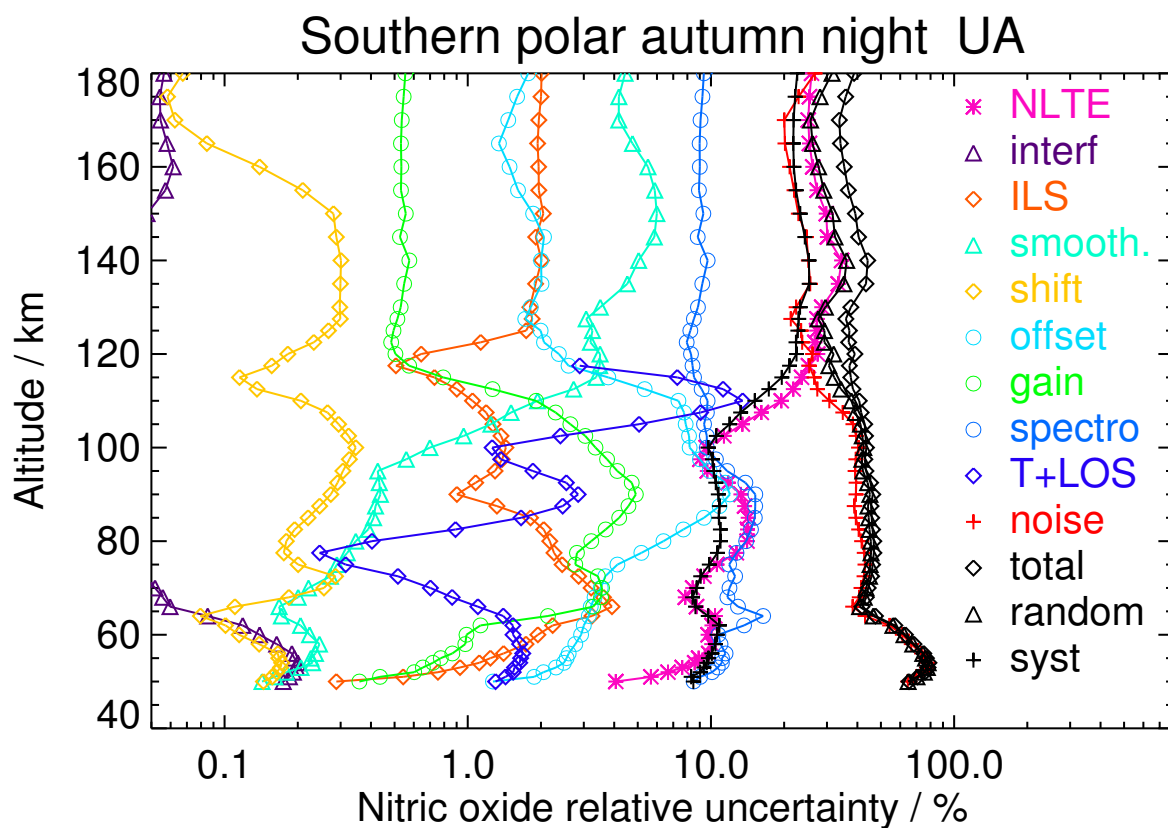

**Figure S170.** V8R\_NOwT\_662 Southern polar autumn night, high solar activity

**Table S172.** Temperature error budget for Northern polar winter day. All uncertainties are  $1\sigma$ .

| altitude (km) | mean target (K) | NLTE (K) | interf (K) | ILS (K) | smooth. (K) | shift (K) | offset (K) | gain (K) | spectro (K) | noise (K) | random (K) | syst (K) | total (K) |
|---------------|-----------------|----------|------------|---------|-------------|-----------|------------|----------|-------------|-----------|------------|----------|-----------|
| 110           | 262.24          | 2.65     | <0.01      | 0.67    | 3.28        | 0.02      | 0.97       | 0.02     | <0.01       | 7.48      | 8.29       | 2.53     | 8.67      |
| 120           | 333.45          | 8.87     | <0.01      | 1.36    | 12.20       | 0.11      | 3.03       | 0.05     | <0.01       | 24.05     | 27.34      | 8.32     | 28.58     |
| 130           | 430.85          | 15.25    | 0.02       | 0.53    | 16.27       | 0.30      | 5.04       | 0.06     | <0.01       | 36.47     | 40.55      | 14.47    | 43.05     |
| 140           | 496.26          | 21.20    | 0.07       | 0.82    | 18.45       | 0.43      | 7.20       | 0.07     | <0.01       | 49.04     | 53.40      | 19.92    | 56.99     |
| 150           | 551.89          | 18.28    | 0.13       | 0.81    | 15.47       | 0.43      | 7.97       | 0.05     | <0.01       | 47.53     | 51.00      | 17.21    | 53.83     |
| 160           | 607.19          | 13.79    | 0.16       | 0.68    | 9.05        | 0.40      | 8.20       | 0.04     | <0.01       | 42.43     | 44.36      | 13.13    | 46.26     |
| 170           | 647.13          | 10.78    | 0.17       | 0.60    | 4.82        | 0.38      | 8.26       | 0.04     | <0.01       | 39.40     | 40.73      | 10.10    | 41.96     |
| 180           | 713.78          | 8.35     | 0.15       | 0.62    | 3.44        | 0.44      | 9.73       | 0.03     | 0.01        | 42.38     | 43.76      | 7.64     | 44.42     |

**S6 Temperature error contribution profile plots and tabulated values for RR UA data (V8R\_TwNO\_662) at low solar activity conditions**

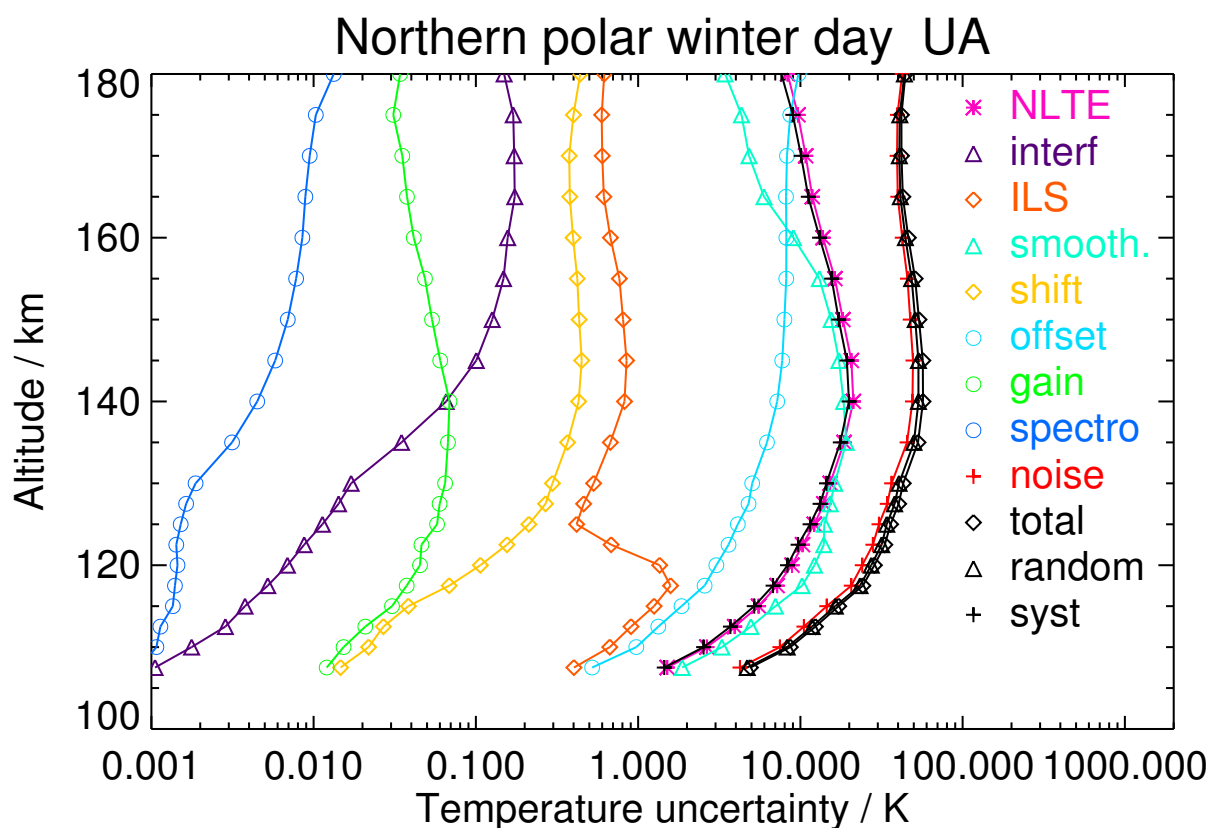

**Figure S171.** V8R\_TwNO\_662 Northern polar winter day



**Table S173.** Temperature error budget for Northern polar winter night. All uncertainties are  $1\sigma$ .

| altitude (km) | mean target (K) | NLTE (K) | interf (K) | ILS (K) | smooth. (K) | shift (K) | offset (K) | gain (K) | spectro (K) | noise (K) | random (K) | syst (K) | total (K) |
|---------------|-----------------|----------|------------|---------|-------------|-----------|------------|----------|-------------|-----------|------------|----------|-----------|
| 110           | 278.15          | 2.00     | <0.01      | 0.52    | 3.45        | 0.01      | 0.85       | <0.01    | <0.01       | 7.26      | 8.16       | 1.72     | 8.34      |
| 120           | 337.52          | 7.06     | <0.01      | 0.92    | 10.68       | 0.08      | 2.93       | 0.03     | <0.01       | 24.94     | 27.61      | 5.77     | 28.21     |
| 130           | 416.36          | 12.32    | <0.01      | 0.41    | 14.25       | 0.20      | 5.00       | 0.04     | <0.01       | 38.07     | 41.66      | 9.67     | 42.77     |
| 140           | 457.43          | 14.36    | 0.01       | 0.53    | 14.72       | 0.27      | 6.22       | 0.05     | <0.01       | 47.67     | 51.14      | 10.93    | 52.29     |
| 150           | 495.35          | 12.28    | 0.02       | 0.48    | 12.34       | 0.29      | 6.24       | 0.04     | 0.01        | 42.76     | 45.47      | 10.17    | 46.59     |
| 160           | 528.18          | 10.77    | 0.03       | 0.44    | 9.02        | 0.31      | 6.21       | 0.04     | 0.02        | 35.97     | 37.86      | 9.81     | 39.11     |
| 170           | 530.19          | 9.76     | 0.03       | 0.40    | 7.60        | 0.32      | 5.78       | 0.04     | 0.02        | 30.30     | 31.86      | 9.49     | 33.24     |

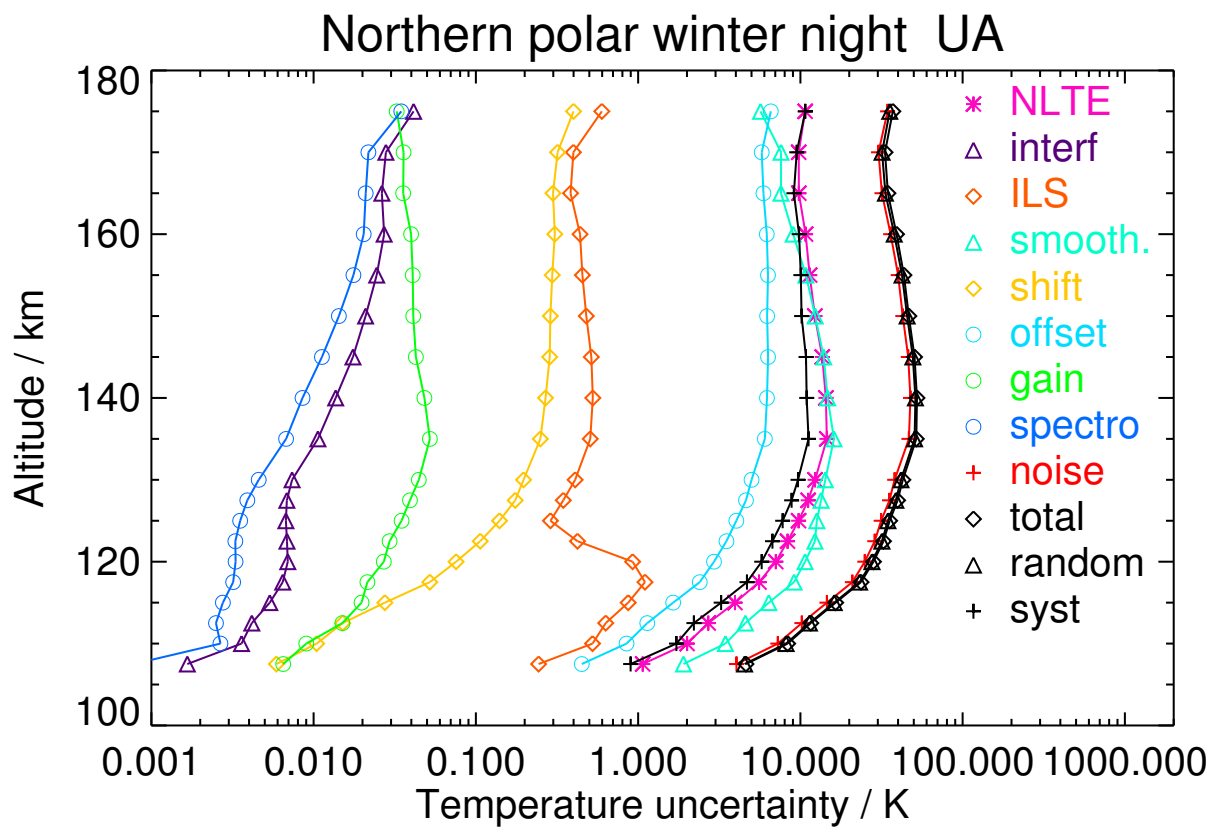

**Figure S172.** V8R\_TwNO\_662 Northern polar winter night

**Table S174.** Temperature error budget for Northern polar spring day. All uncertainties are  $1\sigma$ .

| altitude (km) | mean target (K) | NLTE (K) | interf (K) | ILS (K) | smooth. (K) | shift (K) | offset (K) | gain (K) | spectro (K) | noise (K) | random (K) | syst (K) | total (K) |
|---------------|-----------------|----------|------------|---------|-------------|-----------|------------|----------|-------------|-----------|------------|----------|-----------|
| 110           | 304.75          | 5.96     | 0.04       | 1.21    | 4.02        | 0.04      | 0.81       | 0.03     | <0.01       | 7.65      | 8.87       | 5.81     | 10.60     |
| 120           | 432.79          | 17.86    | 0.13       | 2.84    | 11.53       | 0.26      | 2.21       | 0.07     | 0.01        | 23.89     | 27.04      | 17.45    | 32.18     |
| 130           | 546.06          | 23.24    | 0.43       | 1.12    | 13.02       | 0.52      | 2.80       | 0.07     | 0.01        | 35.98     | 38.75      | 22.65    | 44.88     |
| 140           | 590.01          | 32.35    | 0.53       | 0.84    | 14.13       | 0.57      | 3.41       | 0.05     | <0.01       | 44.58     | 47.29      | 31.79    | 56.98     |
| 150           | 635.58          | 29.46    | 1.10       | 0.78    | 14.16       | 0.55      | 4.14       | 0.06     | 0.01        | 42.19     | 45.28      | 28.59    | 53.55     |
| 160           | 692.27          | 21.29    | 1.61       | 0.83    | 10.83       | 0.49      | 5.45       | 0.09     | 0.03        | 37.75     | 40.53      | 19.66    | 45.04     |
| 170           | 726.96          | 14.22    | 1.74       | 0.96    | 4.60        | 0.53      | 6.79       | 0.11     | 0.04        | 39.38     | 41.07      | 11.74    | 42.72     |
| 180           | 758.42          | 11.90    | 1.82       | 1.05    | 3.70        | 0.56      | 7.18       | 0.11     | 0.04        | 39.68     | 41.41      | 8.46     | 42.26     |

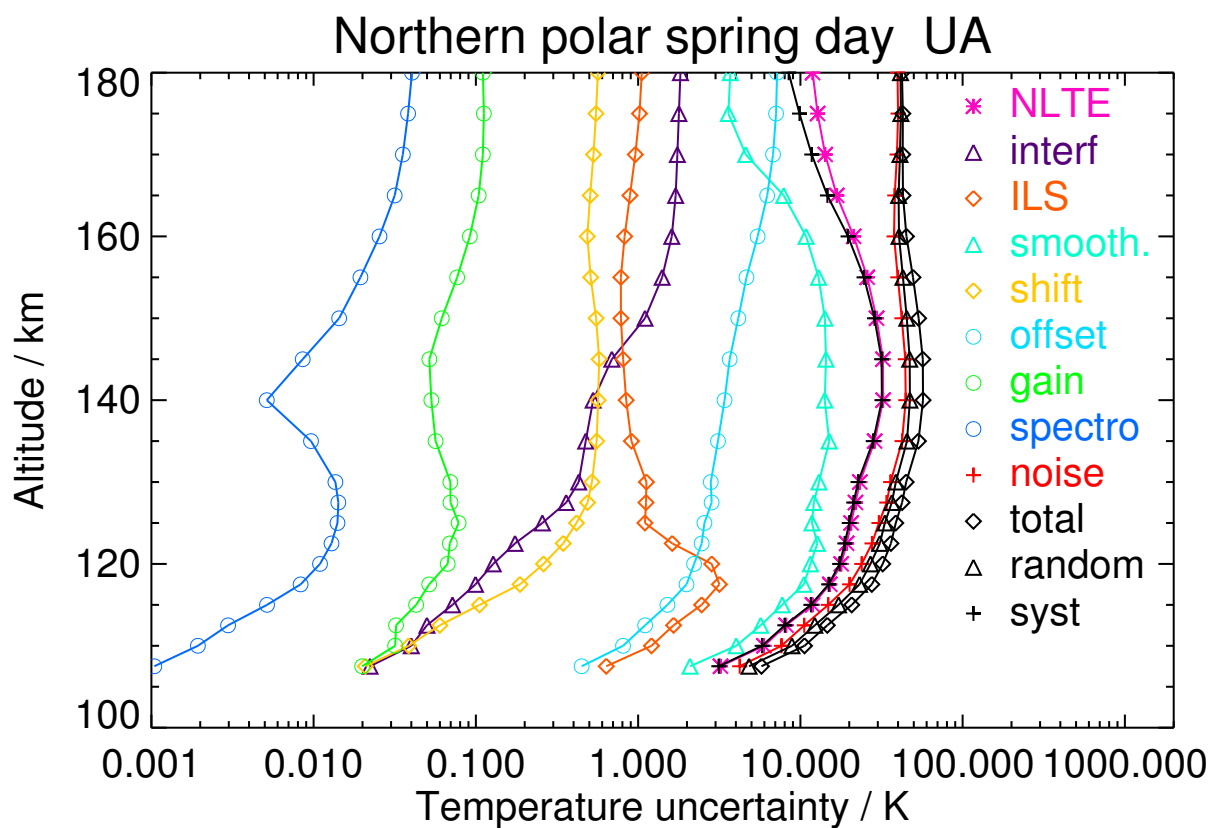

**Figure S173.** V8R\_TwNO\_662 Northern polar spring day

**Table S175.** Temperature error budget for Northern polar spring night. All uncertainties are  $1\sigma$ .

| altitude (km) | mean target (K) | NLTE (K) | interf (K) | ILS (K) | smooth. (K) | shift (K) | offset (K) | gain (K) | spectro (K) | noise (K) | random (K) | syst (K) | total (K) |
|---------------|-----------------|----------|------------|---------|-------------|-----------|------------|----------|-------------|-----------|------------|----------|-----------|
| 110           | 282.12          | 5.10     | <0.01      | 1.13    | 3.55        | 0.09      | 0.74       | 0.09     | <0.01       | 8.01      | 9.51       | 3.75     | 10.23     |
| 120           | 387.46          | 14.06    | 0.02       | 2.57    | 9.46        | 0.24      | 2.09       | 0.06     | <0.01       | 20.49     | 23.87      | 12.17    | 26.79     |
| 130           | 500.58          | 17.50    | 0.04       | 0.84    | 11.84       | 0.47      | 2.96       | 0.06     | 0.01        | 32.35     | 35.47      | 15.64    | 38.76     |
| 140           | 556.84          | 27.00    | 0.09       | 0.69    | 13.53       | 0.47      | 4.32       | 0.06     | <0.01       | 44.35     | 48.10      | 24.17    | 53.83     |
| 150           | 621.28          | 26.27    | 0.29       | 0.86    | 13.10       | 0.58      | 5.14       | 0.04     | 0.02        | 42.84     | 46.38      | 23.94    | 52.19     |
| 160           | 690.63          | 19.33    | 0.44       | 1.17    | 10.93       | 0.64      | 6.02       | 0.03     | 0.03        | 41.30     | 43.60      | 18.32    | 47.30     |
| 170           | 725.33          | 12.39    | 0.45       | 1.26    | 4.82        | 0.68      | 6.82       | 0.03     | 0.04        | 41.19     | 42.77      | 9.64     | 43.84     |
| 180           | 758.28          | 11.35    | 0.53       | 1.48    | 4.19        | 0.81      | 7.12       | 0.04     | 0.04        | 40.69     | 42.70      | 5.70     | 43.08     |

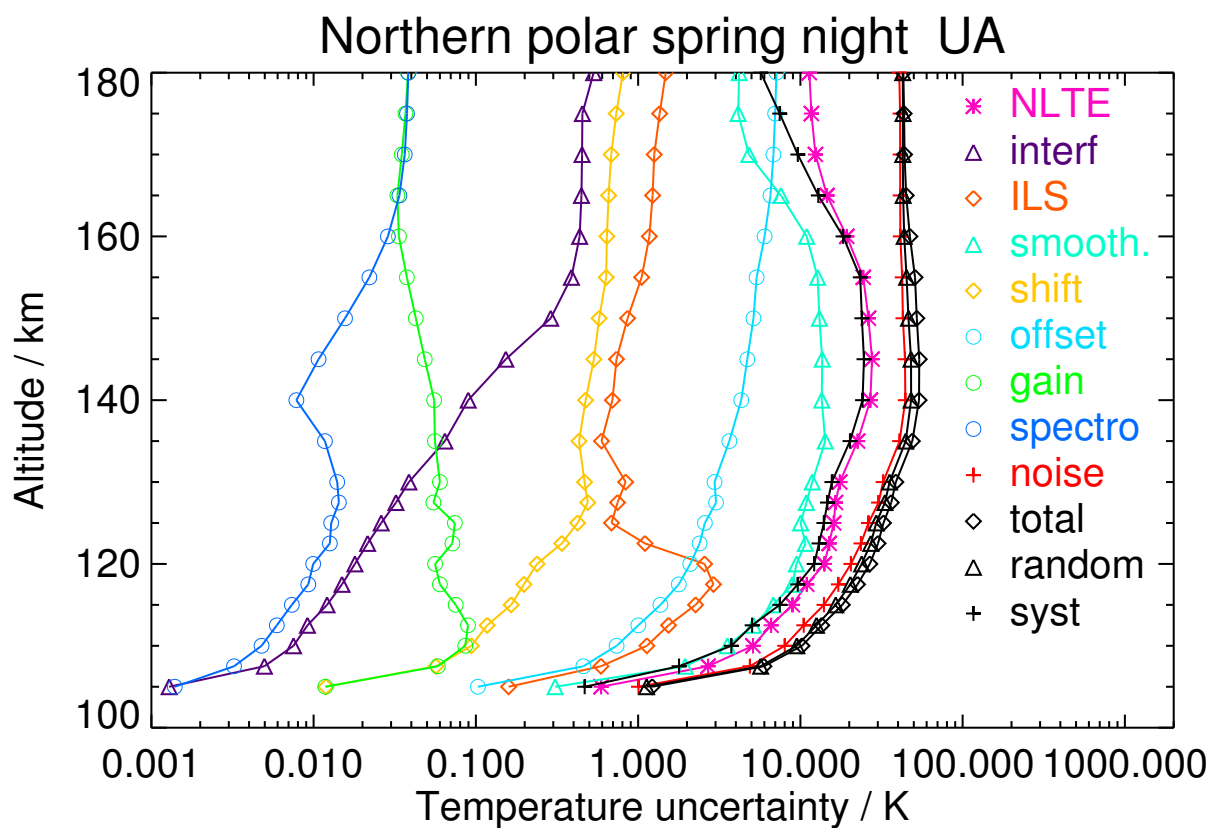

**Figure S174.** V8R\_TwNO\_662 Northern polar spring night

**Table S176.** Temperature error budget for Northern polar summer day. All uncertainties are  $1\sigma$ .

| altitude (km) | mean target (K) | NLTE (K) | interf (K) | ILS (K) | smooth. (K) | shift (K) | offset (K) | gain (K) | spectro (K) | noise (K) | random (K) | syst (K) | total (K) |
|---------------|-----------------|----------|------------|---------|-------------|-----------|------------|----------|-------------|-----------|------------|----------|-----------|
| 110           | 323.28          | 3.27     | 0.01       | 1.65    | 3.80        | 0.02      | 0.96       | 0.01     | <0.01       | 7.47      | 8.55       | 3.39     | 9.20      |
| 120           | 376.85          | 10.66    | 0.03       | 3.25    | 12.37       | 0.08      | 3.19       | 0.06     | 0.02        | 24.80     | 28.20      | 10.35    | 30.04     |
| 130           | 463.53          | 16.92    | 0.06       | 1.77    | 15.84       | 0.29      | 5.10       | 0.07     | 0.03        | 38.46     | 42.33      | 15.93    | 45.23     |
| 140           | 528.52          | 19.98    | 0.17       | 1.88    | 16.56       | 0.57      | 6.54       | 0.06     | 0.02        | 48.55     | 52.26      | 18.59    | 55.47     |
| 150           | 585.36          | 16.09    | 0.26       | 1.39    | 13.31       | 0.58      | 7.39       | 0.08     | 0.04        | 45.76     | 48.64      | 14.88    | 50.87     |
| 160           | 634.29          | 11.03    | 0.29       | 0.93    | 8.41        | 0.53      | 7.99       | 0.09     | 0.07        | 43.16     | 44.97      | 9.87     | 46.04     |
| 170           | 678.11          | 7.68     | 0.31       | 0.67    | 3.93        | 0.50      | 8.22       | 0.10     | 0.08        | 42.21     | 43.46      | 5.98     | 43.87     |
| 180           | 704.81          | 6.08     | 0.27       | 0.54    | 3.72        | 0.53      | 8.09       | 0.10     | 0.08        | 41.38     | 42.61      | 3.74     | 42.77     |

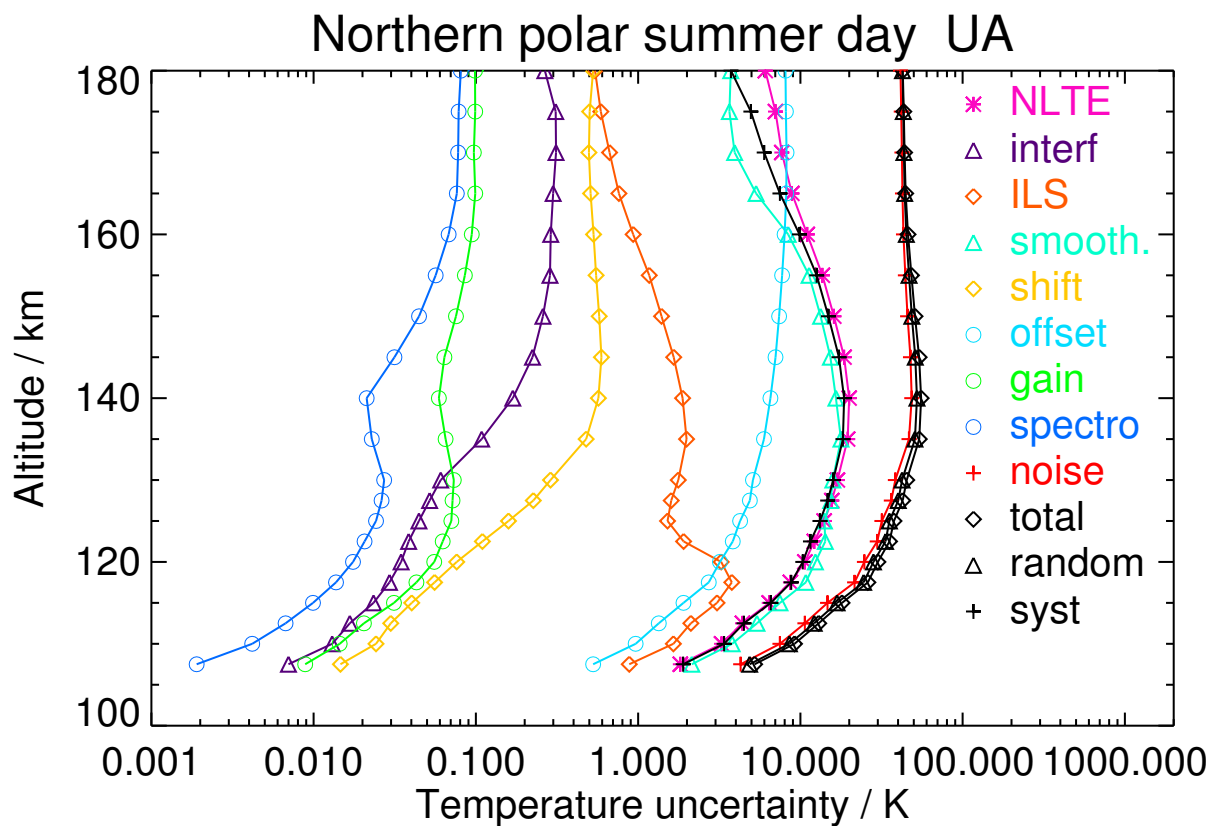

**Figure S175.** V8R\_TwNO\_662 Northern polar summer day

**Table S177.** Temperature error budget for Northern polar summer night. All uncertainties are  $1\sigma$ .

| altitude (km) | mean target (K) | NLTE (K) | interf (K) | ILS (K) | smooth. (K) | shift (K) | offset (K) | gain (K) | spectro (K) | noise (K) | random (K) | syst (K) | total (K) |
|---------------|-----------------|----------|------------|---------|-------------|-----------|------------|----------|-------------|-----------|------------|----------|-----------|
| 110           | 303.93          | 4.14     | 0.01       | 1.23    | 3.94        | 0.09      | 0.80       | 0.02     | <0.01       | 7.80      | 9.09       | 3.60     | 9.78      |
| 120           | 388.75          | 10.64    | 0.03       | 2.55    | 10.44       | 0.16      | 2.83       | 0.05     | 0.01        | 23.02     | 26.18      | 9.03     | 27.69     |
| 130           | 474.47          | 14.00    | 0.05       | 0.98    | 13.06       | 0.31      | 4.44       | 0.06     | 0.02        | 34.87     | 38.23      | 11.90    | 40.04     |
| 140           | 523.79          | 19.72    | 0.07       | 0.98    | 14.49       | 0.48      | 5.55       | 0.06     | 0.01        | 45.82     | 49.66      | 16.26    | 52.25     |
| 150           | 586.75          | 19.68    | 0.19       | 1.15    | 13.91       | 0.57      | 6.20       | 0.05     | 0.02        | 43.68     | 47.08      | 17.67    | 50.28     |
| 160           | 647.03          | 13.34    | 0.33       | 1.13    | 10.48       | 0.59      | 7.15       | 0.05     | 0.04        | 42.12     | 44.30      | 12.35    | 45.99     |
| 170           | 698.07          | 8.24     | 0.41       | 1.07    | 4.78        | 0.61      | 7.88       | 0.05     | 0.05        | 42.51     | 43.81      | 6.50     | 44.29     |
| 180           | 713.07          | 5.84     | 0.23       | 1.18    | 4.38        | 0.64      | 7.77       | 0.05     | 0.05        | 41.55     | 42.80      | 3.23     | 42.92     |

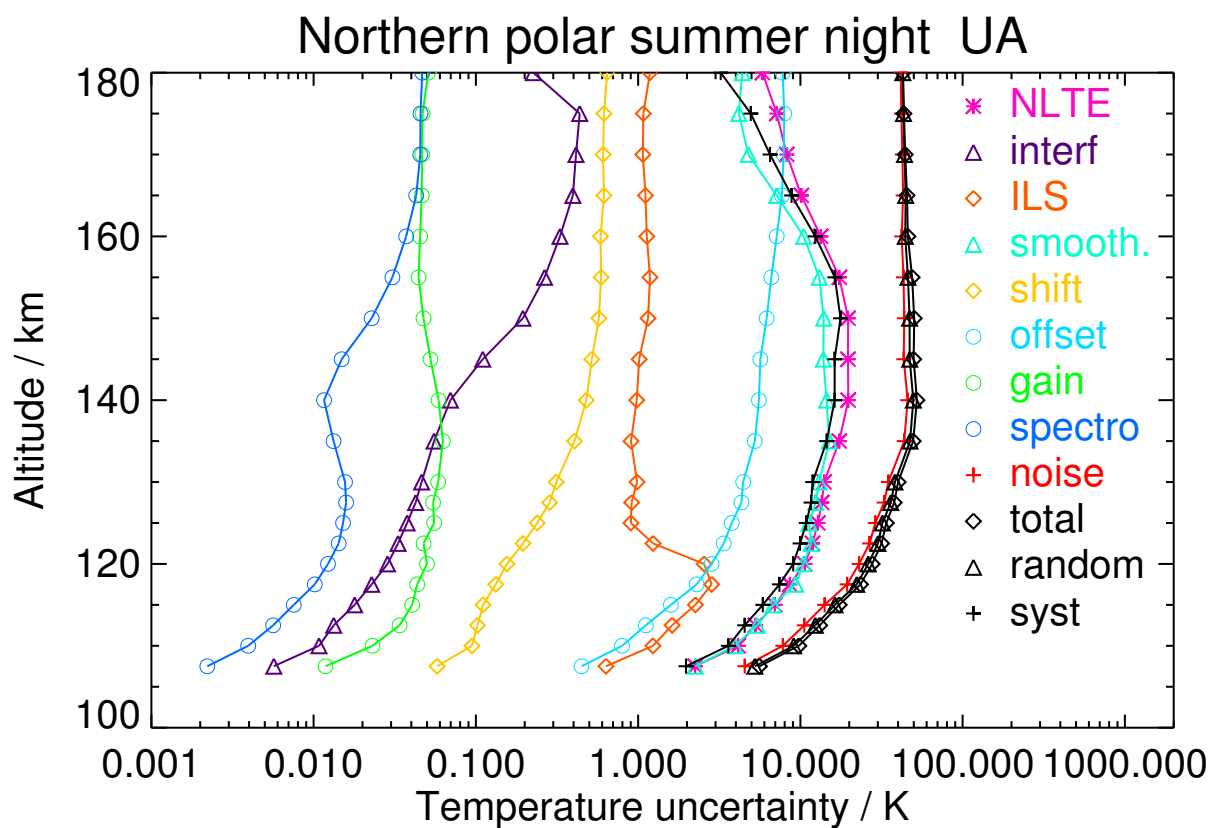

**Figure S176.** V8R\_TwNO\_662 Northern polar summer night

**Table S178.** Temperature error budget for Northern polar autumn day. All uncertainties are  $1\sigma$ .

| altitude (km) | mean target (K) | NLTE (K) | interf (K) | ILS (K) | smooth. (K) | shift (K) | offset (K) | gain (K) | spectro (K) | noise (K) | random (K) | syst (K) | total (K) |
|---------------|-----------------|----------|------------|---------|-------------|-----------|------------|----------|-------------|-----------|------------|----------|-----------|
| 110           | 292.56          | 4.97     | <0.01      | 0.89    | 3.93        | 0.03      | 0.80       | 0.04     | <0.01       | 7.41      | 8.69       | 4.59     | 9.82      |
| 120           | 422.07          | 13.67    | 0.02       | 1.61    | 11.73       | 0.19      | 2.78       | 0.08     | <0.01       | 24.37     | 27.59      | 12.95    | 30.47     |
| 130           | 515.27          | 21.17    | 0.09       | 0.73    | 14.27       | 0.36      | 4.39       | 0.10     | <0.01       | 36.94     | 40.25      | 20.40    | 45.12     |
| 140           | 554.98          | 26.65    | 0.24       | 0.67    | 16.96       | 0.35      | 6.02       | 0.09     | <0.01       | 48.27     | 52.05      | 25.61    | 58.01     |
| 150           | 583.01          | 22.40    | 0.28       | 0.65    | 16.30       | 0.38      | 6.71       | 0.07     | 0.01        | 46.45     | 50.07      | 21.56    | 54.51     |
| 160           | 644.11          | 16.49    | 0.31       | 0.66    | 10.64       | 0.43      | 7.43       | 0.06     | 0.02        | 43.15     | 45.37      | 15.65    | 47.99     |
| 170           | 682.75          | 12.32    | 0.34       | 0.67    | 4.55        | 0.47      | 7.73       | 0.04     | 0.02        | 41.11     | 42.42      | 11.09    | 43.85     |
| 180           | 708.78          | 9.80     | 0.23       | 0.82    | 3.99        | 0.49      | 7.94       | 0.04     | 0.03        | 41.28     | 42.71      | 7.45     | 43.35     |

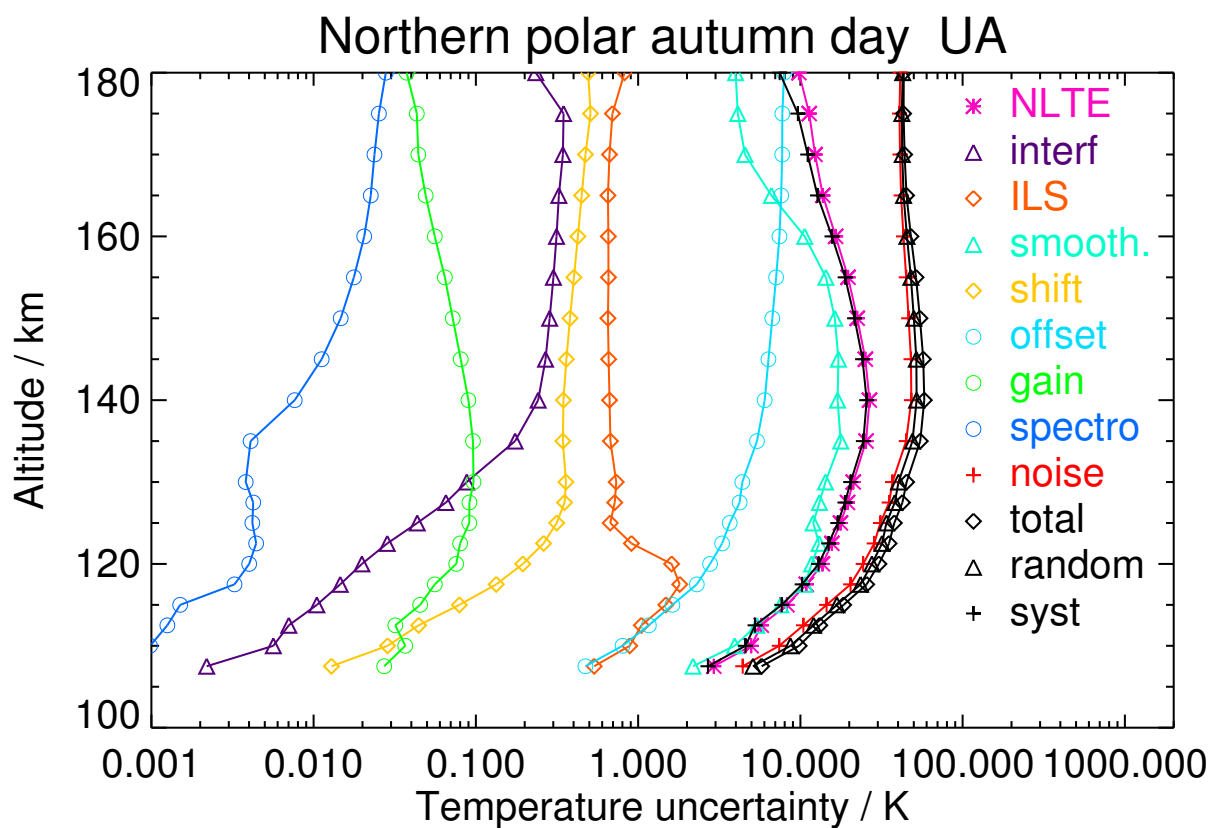

**Figure S177.** V8R\_TwNO\_662 Northern polar autumn day

**Table S179.** Temperature error budget for Northern polar autumn night. All uncertainties are  $1\sigma$ .

| altitude (km) | mean target (K) | NLTE (K) | interf (K) | ILS (K) | smooth. (K) | shift (K) | offset (K) | gain (K) | spectro (K) | noise (K) | random (K) | syst (K) | total (K) |
|---------------|-----------------|----------|------------|---------|-------------|-----------|------------|----------|-------------|-----------|------------|----------|-----------|
| 110           | 277.57          | 3.09     | <0.01      | 0.57    | 3.82        | 0.02      | 0.85       | 0.04     | <0.01       | 7.74      | 8.83       | 2.68     | 9.23      |
| 120           | 380.66          | 9.13     | 0.01       | 1.23    | 10.60       | 0.14      | 2.89       | 0.04     | <0.01       | 22.90     | 25.74      | 8.21     | 27.02     |
| 130           | 460.53          | 13.43    | 0.02       | 0.59    | 14.04       | 0.25      | 4.72       | 0.05     | 0.01        | 34.41     | 38.17      | 11.30    | 39.80     |
| 140           | 495.70          | 13.91    | 0.03       | 0.51    | 14.49       | 0.22      | 5.51       | 0.04     | <0.01       | 43.13     | 46.65      | 10.87    | 47.90     |
| 150           | 544.27          | 14.00    | 0.05       | 0.57    | 13.28       | 0.31      | 6.01       | 0.04     | 0.01        | 43.20     | 46.07      | 12.36    | 47.70     |
| 160           | 585.28          | 12.35    | 0.02       | 0.53    | 9.49        | 0.36      | 6.04       | 0.03     | 0.02        | 37.69     | 39.53      | 11.72    | 41.23     |
| 170           | 619.16          | 10.66    | 0.04       | 0.49    | 6.35        | 0.43      | 6.99       | 0.03     | 0.03        | 38.52     | 39.88      | 9.80     | 41.07     |
| 180           | 628.84          | 8.21     | 0.04       | 0.51    | 6.03        | 0.52      | 7.75       | 0.03     | 0.03        | 40.33     | 41.51      | 8.23     | 42.32     |

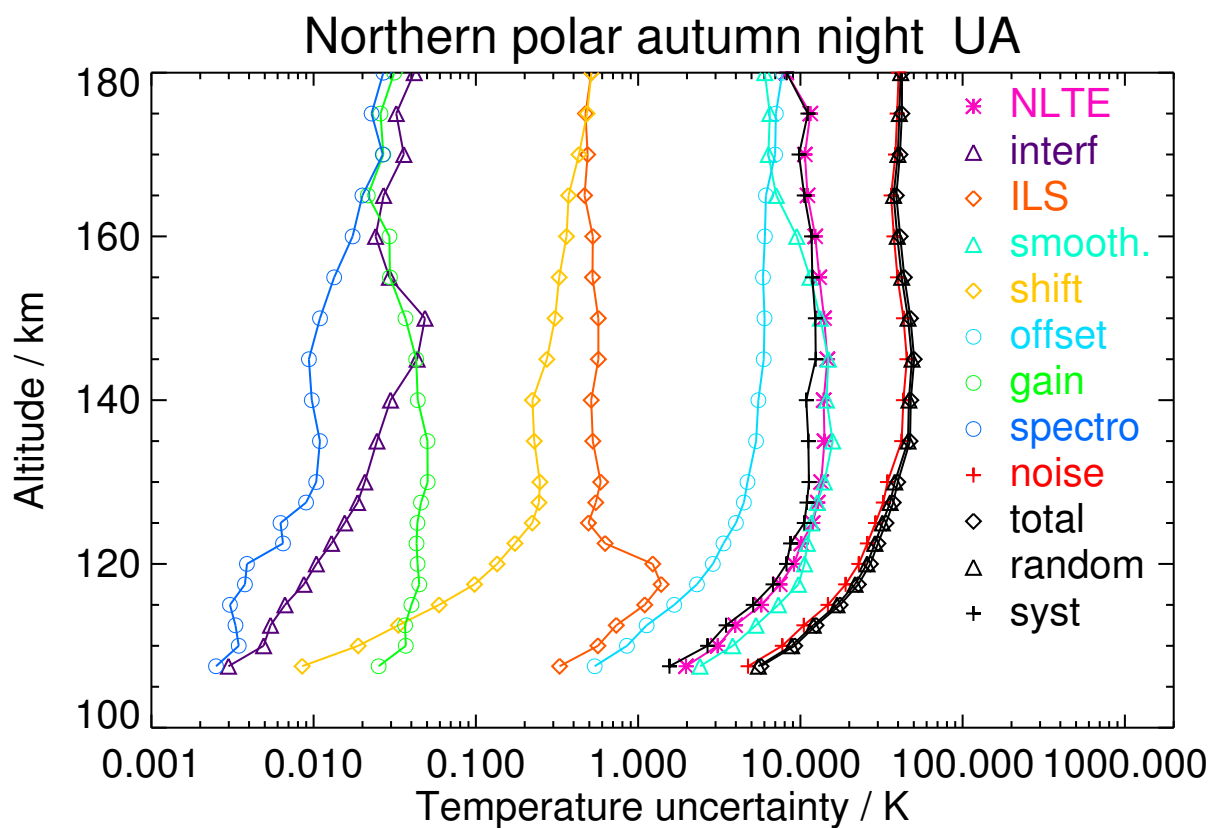

**Figure S178.** V8R\_TwNO\_662 Northern polar autumn night

**Table S180.** Temperature error budget for Northern midlatitude winter day. All uncertainties are  $1\sigma$ .

| altitude (km) | mean target (K) | NLTE (K) | interf (K) | ILS (K) | smooth. (K) | shift (K) | offset (K) | gain (K) | spectro (K) | noise (K) | random (K) | syst (K) | total (K) |
|---------------|-----------------|----------|------------|---------|-------------|-----------|------------|----------|-------------|-----------|------------|----------|-----------|
| 110           | 344.81          | 2.26     | <0.01      | 1.19    | 4.19        | 0.03      | 1.11       | <0.01    | <0.01       | 7.38      | 8.56       | 2.56     | 8.94      |
| 120           | 341.41          | 6.05     | 0.01       | 0.93    | 8.38        | 0.04      | 2.67       | 0.03     | <0.01       | 23.01     | 24.75      | 5.64     | 25.39     |
| 130           | 443.85          | 11.85    | 0.02       | 0.31    | 13.54       | 0.12      | 5.16       | 0.04     | <0.01       | 37.71     | 40.67      | 10.87    | 42.10     |
| 140           | 489.76          | 18.02    | 0.08       | 0.39    | 17.41       | 0.22      | 7.86       | 0.06     | 0.01        | 51.07     | 54.88      | 16.90    | 57.43     |
| 150           | 555.79          | 18.61    | 0.13       | 0.51    | 14.78       | 0.29      | 8.97       | 0.07     | 0.02        | 49.38     | 52.70      | 17.54    | 55.54     |
| 160           | 608.62          | 15.10    | 0.13       | 0.48    | 8.15        | 0.30      | 8.89       | 0.07     | 0.03        | 43.38     | 45.31      | 14.25    | 47.49     |
| 170           | 641.42          | 12.56    | 0.06       | 0.45    | 4.54        | 0.31      | 8.63       | 0.06     | 0.03        | 39.09     | 40.45      | 12.04    | 42.21     |
| 180           | 662.72          | 10.72    | 0.06       | 0.50    | 4.49        | 0.37      | 9.31       | 0.08     | 0.04        | 40.69     | 42.04      | 10.52    | 43.33     |

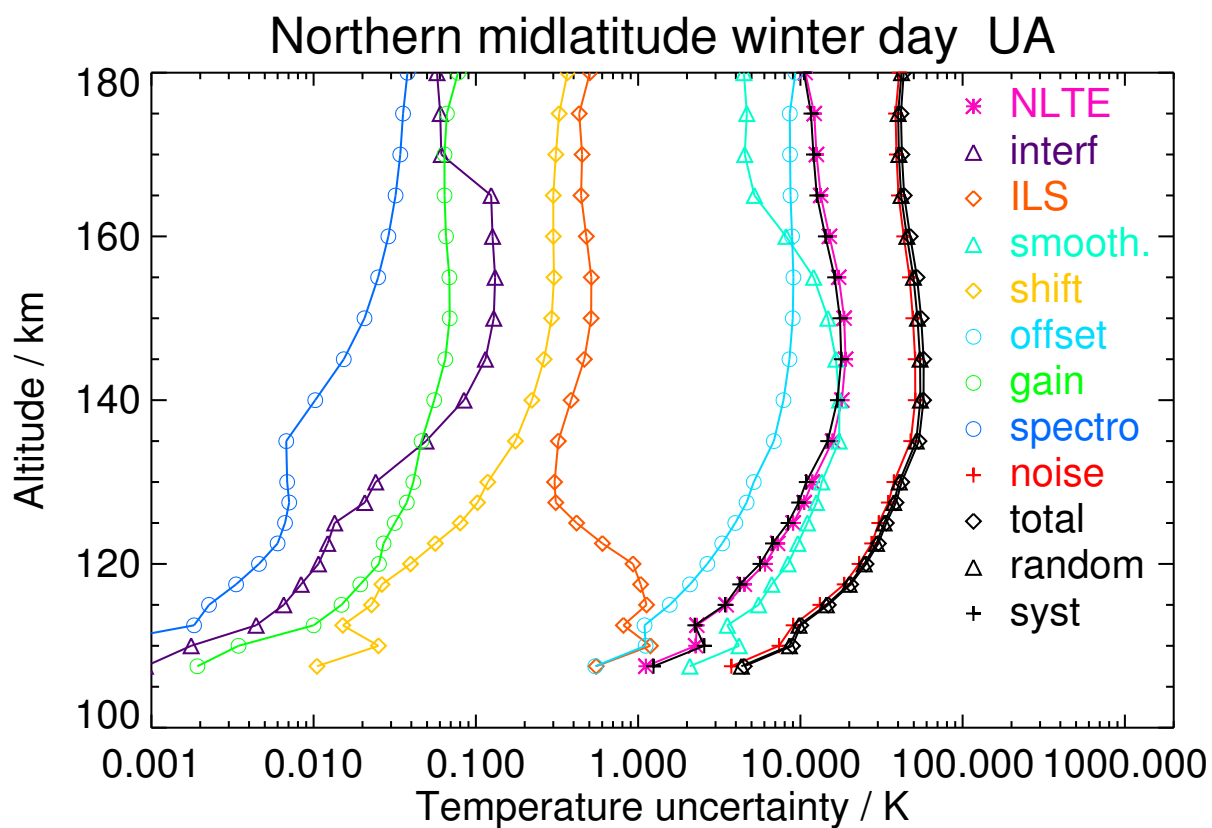

**Figure S179.** V8R\_TwNO\_662 Northern midlatitude winter day



**Table S181.** Temperature error budget for Northern midlatitude winter night. All uncertainties are  $1\sigma$ .

| altitude (km) | mean target (K) | NLTE (K) | interf (K) | ILS (K) | smooth. (K) | shift (K) | offset (K) | gain (K) | spectro (K) | noise (K) | random (K) | syst (K) | total (K) |
|---------------|-----------------|----------|------------|---------|-------------|-----------|------------|----------|-------------|-----------|------------|----------|-----------|
| 110           | 271.43          | 1.98     | <0.01      | 0.54    | 3.09        | <0.01     | 0.89       | <0.01    | <0.01       | 7.35      | 8.15       | 1.50     | 8.28      |
| 120           | 325.42          | 4.05     | 0.01       | 0.66    | 7.94        | 0.03      | 2.71       | 0.03     | <0.01       | 24.63     | 26.18      | 2.89     | 26.34     |
| 130           | 419.07          | 5.67     | 0.01       | 0.22    | 10.13       | 0.08      | 4.31       | 0.03     | 0.01        | 35.72     | 37.60      | 3.98     | 37.81     |
| 140           | 488.65          | 7.13     | 0.01       | 0.38    | 10.50       | 0.13      | 5.92       | 0.06     | 0.01        | 44.16     | 46.05      | 5.08     | 46.33     |
| 150           | 545.25          | 8.55     | 0.02       | 0.49    | 7.81        | 0.21      | 6.45       | 0.06     | 0.01        | 38.14     | 39.91      | 6.12     | 40.38     |
| 160           | 611.20          | 11.46    | 0.03       | 0.79    | 6.66        | 0.37      | 7.63       | 0.08     | 0.02        | 38.12     | 39.79      | 10.22    | 41.08     |
| 170           | 591.19          | 10.80    | 0.02       | 0.87    | 6.29        | 0.50      | 7.74       | 0.02     | 0.01        | 36.73     | 38.06      | 10.84    | 39.58     |

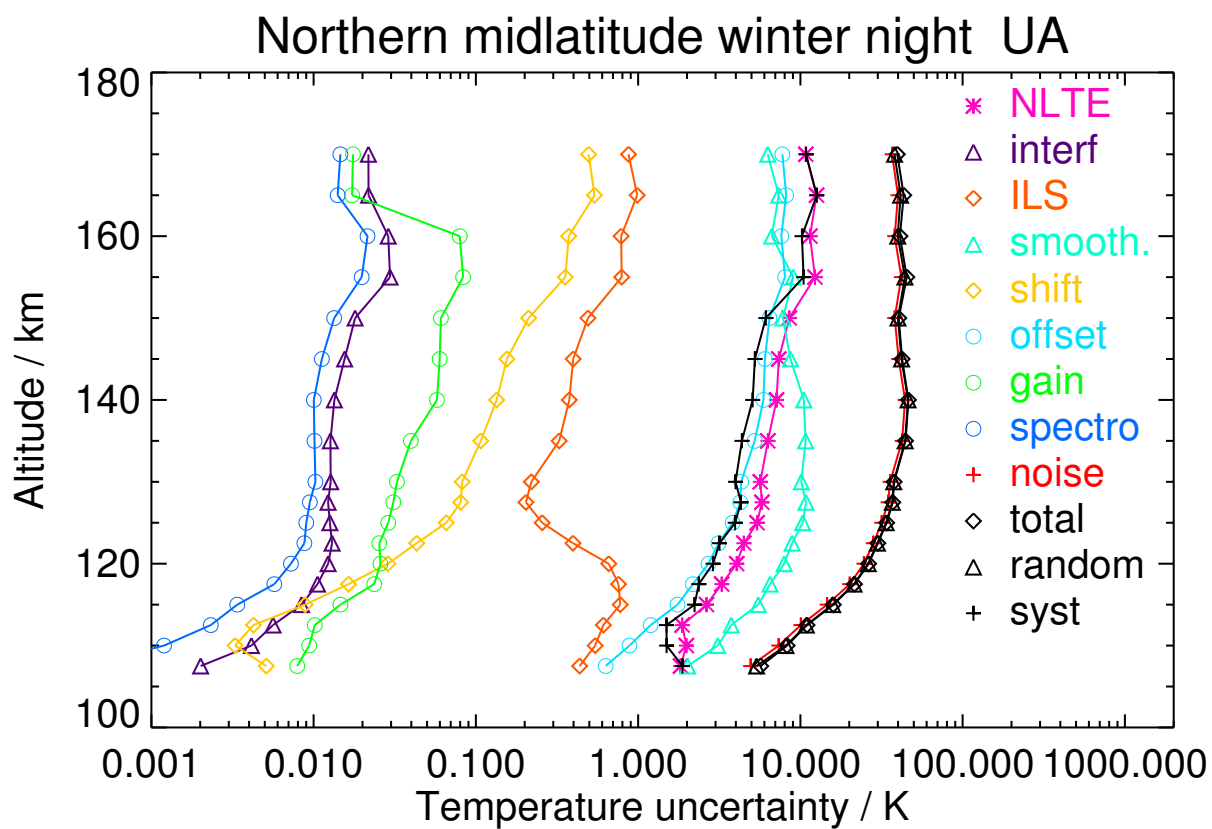

**Figure S180.** V8R\_TwNO\_662 Northern midlatitude winter night

**Table S182.** Temperature error budget for Northern midlatitude spring day. All uncertainties are  $1\sigma$ .

| altitude (km) | mean target (K) | NLTE (K) | interf (K) | ILS (K) | smooth. (K) | shift (K) | offset (K) | gain (K) | spectro (K) | noise (K) | random (K) | syst (K) | total (K) |
|---------------|-----------------|----------|------------|---------|-------------|-----------|------------|----------|-------------|-----------|------------|----------|-----------|
| 110           | 269.72          | 5.84     | <0.01      | 0.88    | 3.33        | 0.03      | 0.85       | 0.03     | <0.01       | 7.73      | 8.85       | 5.31     | 10.32     |
| 120           | 380.54          | 16.31    | 0.02       | 1.69    | 11.62       | 0.13      | 2.45       | 0.06     | <0.01       | 23.55     | 27.05      | 15.26    | 31.06     |
| 130           | 487.50          | 22.49    | 0.04       | 0.49    | 14.43       | 0.34      | 3.54       | 0.06     | 0.01        | 36.16     | 39.37      | 22.00    | 45.10     |
| 140           | 551.17          | 33.08    | 0.08       | 0.66    | 15.81       | 0.45      | 4.12       | 0.05     | <0.01       | 44.43     | 47.81      | 32.40    | 57.75     |
| 150           | 634.04          | 32.68    | 0.21       | 0.84    | 14.21       | 0.55      | 5.19       | 0.05     | 0.02        | 43.03     | 46.12      | 31.98    | 56.12     |
| 160           | 689.54          | 23.82    | 0.35       | 0.92    | 10.68       | 0.51      | 6.47       | 0.05     | 0.03        | 40.82     | 43.11      | 23.06    | 48.89     |
| 170           | 729.78          | 15.89    | 0.42       | 1.01    | 4.23        | 0.52      | 7.33       | 0.05     | 0.04        | 41.73     | 43.05      | 14.61    | 45.47     |
| 180           | 752.43          | 12.83    | 0.42       | 1.12    | 3.81        | 0.54      | 7.22       | 0.05     | 0.04        | 40.49     | 42.01      | 10.37    | 43.28     |

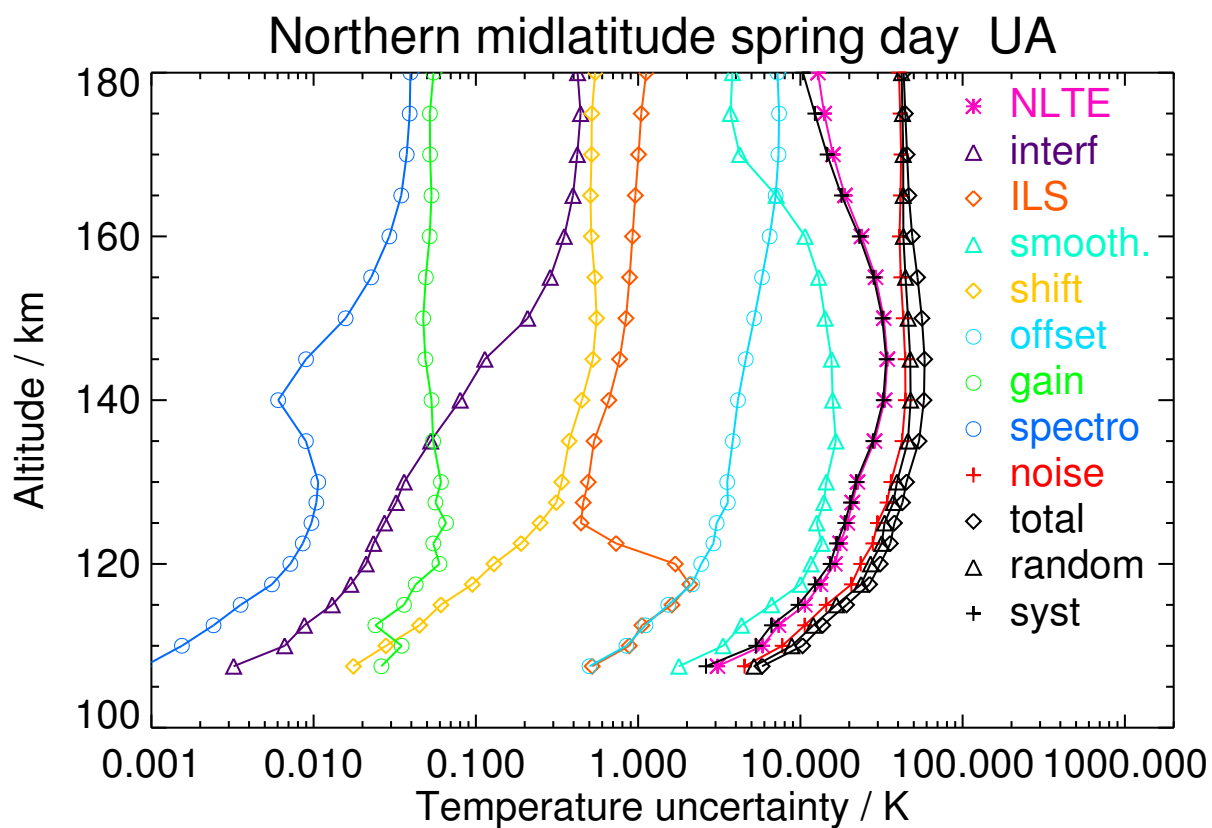

**Figure S181.** V8R\_TwNO\_662 Northern midlatitude spring day

**Table S183.** Temperature error budget for Northern midlatitude spring night. All uncertainties are  $1\sigma$ .

| altitude (km) | mean target (K) | NLTE (K) | interf (K) | ILS (K) | smooth. (K) | shift (K) | offset (K) | gain (K) | spectro (K) | noise (K) | random (K) | syst (K) | total (K) |
|---------------|-----------------|----------|------------|---------|-------------|-----------|------------|----------|-------------|-----------|------------|----------|-----------|
| 110           | 301.04          | 3.46     | 0.01       | 0.97    | 3.52        | 0.02      | 0.87       | <0.01    | <0.01       | 7.38      | 8.38       | 3.20     | 8.97      |
| 120           | 350.51          | 6.00     | 0.03       | 1.51    | 9.24        | 0.07      | 3.10       | 0.02     | 0.02        | 24.55     | 26.70      | 4.80     | 27.13     |
| 130           | 421.70          | 9.46     | 0.03       | 0.50    | 12.65       | 0.17      | 4.75       | 0.04     | 0.03        | 38.39     | 41.15      | 7.24     | 41.79     |
| 140           | 481.96          | 12.26    | 0.03       | 0.60    | 13.08       | 0.22      | 5.92       | 0.06     | 0.02        | 46.80     | 49.68      | 8.87     | 50.47     |
| 150           | 573.75          | 13.65    | 0.07       | 0.65    | 10.21       | 0.30      | 7.01       | 0.07     | 0.02        | 42.47     | 45.03      | 10.78    | 46.31     |
| 160           | 622.48          | 12.63    | 0.12       | 0.66    | 7.45        | 0.36      | 7.48       | 0.07     | 0.03        | 40.18     | 41.93      | 11.30    | 43.43     |
| 170           | 664.22          | 10.88    | 0.14       | 0.63    | 5.04        | 0.40      | 7.28       | 0.06     | 0.04        | 38.44     | 39.69      | 9.98     | 40.93     |

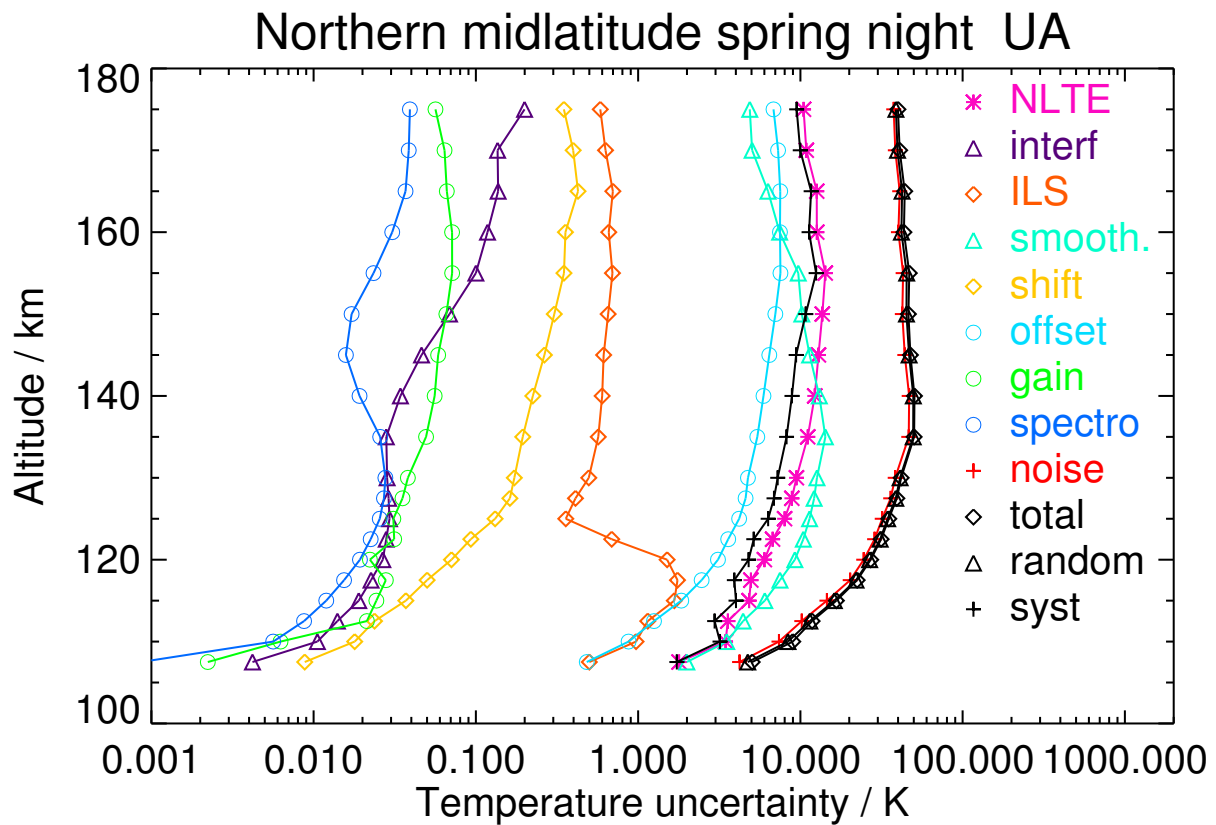

**Figure S182.** V8R\_TwNO\_662 Northern midlatitude spring night

**Table S184.** Temperature error budget for Northern midlatitude summer day. All uncertainties are  $1\sigma$ .

| altitude<br>(km) | mean target<br>(K) | NLTE<br>(K) | interf<br>(K) | ILS<br>(K) | smooth.<br>(K) | shift<br>(K) | offset<br>(K) | gain<br>(K) | spectro<br>(K) | noise<br>(K) | random<br>(K) | syst<br>(K) | total<br>(K) |
|------------------|--------------------|-------------|---------------|------------|----------------|--------------|---------------|-------------|----------------|--------------|---------------|-------------|--------------|
| 110              | 312.61             | 2.86        | <0.01         | 0.83       | 3.25           | 0.02         | 0.80          | <0.01       | <0.01          | 7.11         | 7.91          | 2.83        | 8.40         |
| 120              | 348.23             | 9.77        | 0.02          | 1.44       | 11.38          | 0.08         | 2.75          | 0.03        | <0.01          | 24.87        | 27.62         | 9.50        | 29.21        |
| 130              | 443.89             | 17.55       | 0.04          | 0.44       | 16.27          | 0.27         | 4.66          | 0.05        | 0.01           | 38.64        | 42.36         | 17.12       | 45.69        |
| 140              | 535.90             | 25.80       | 0.09          | 1.07       | 16.88          | 0.55         | 6.33          | 0.05        | 0.01           | 47.84        | 51.32         | 25.44       | 57.28        |
| 150              | 617.46             | 22.62       | 0.29          | 1.05       | 14.30          | 0.53         | 7.42          | 0.05        | 0.02           | 45.02        | 48.01         | 22.24       | 52.91        |
| 160              | 691.87             | 15.64       | 0.46          | 0.79       | 8.58           | 0.39         | 8.20          | 0.05        | 0.04           | 43.64        | 45.44         | 15.04       | 47.87        |
| 170              | 729.69             | 10.87       | 0.49          | 0.58       | 3.78           | 0.31         | 8.18          | 0.05        | 0.05           | 41.69        | 42.87         | 10.00       | 44.02        |
| 180              | 757.16             | 8.91        | 0.61          | 0.54       | 3.34           | 0.31         | 8.18          | 0.05        | 0.05           | 40.13        | 41.36         | 7.59        | 42.05        |

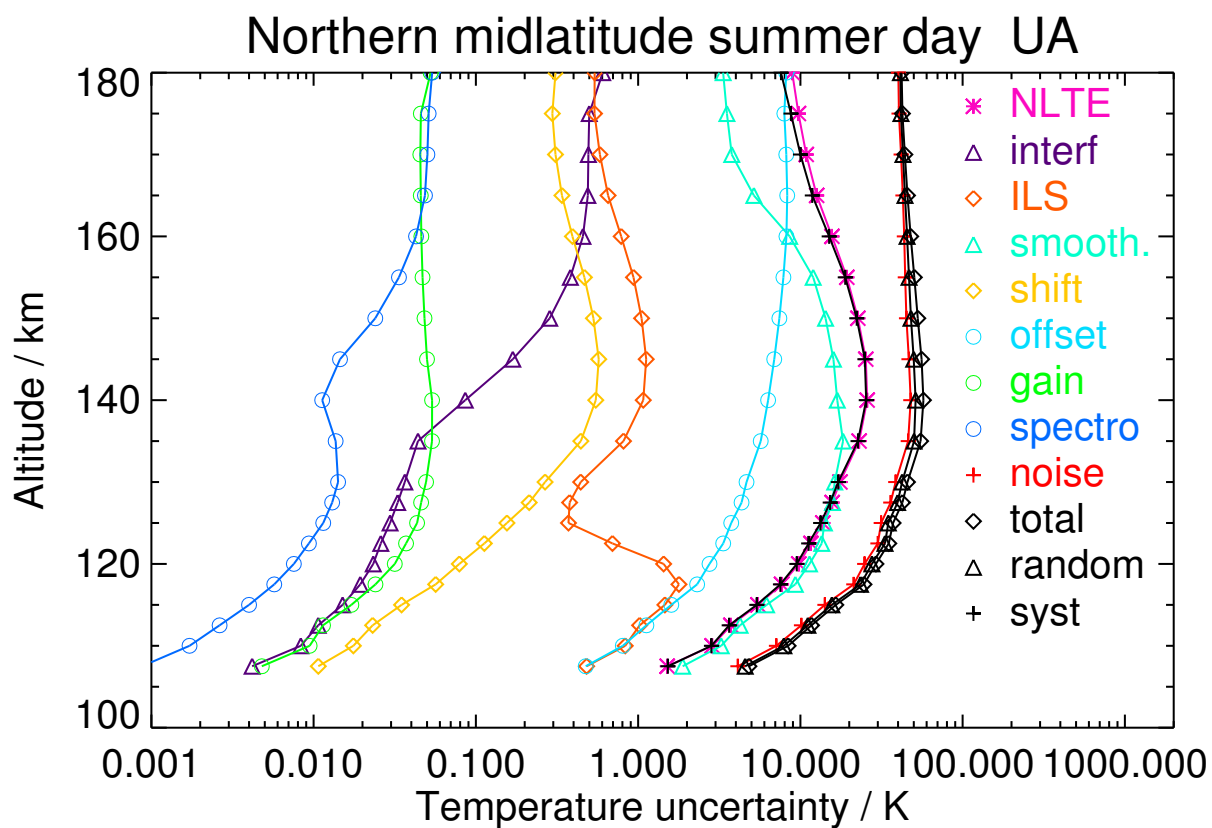

**Figure S183.** V8R\_TwNO\_662 Northern midlatitude summer day

**Table S185.** Temperature error budget for Northern midlatitude summer night. All uncertainties are  $1\sigma$ .

| altitude (km) | mean target (K) | NLTE (K) | interf (K) | ILS (K) | smooth. (K) | shift (K) | offset (K) | gain (K) | spectro (K) | noise (K) | random (K) | syst (K) | total (K) |
|---------------|-----------------|----------|------------|---------|-------------|-----------|------------|----------|-------------|-----------|------------|----------|-----------|
| 120           | 346.28          | 3.09     | 0.03       | 0.84    | 7.97        | 0.02      | 3.19       | 0.03     | 0.03        | 24.95     | 26.43      | 2.83     | 26.58     |
| 130           | 425.87          | 5.11     | 0.03       | 0.45    | 12.32       | 0.05      | 5.38       | 0.03     | 0.03        | 38.87     | 41.20      | 4.46     | 41.44     |
| 140           | 467.12          | 5.44     | 0.03       | 0.31    | 11.47       | 0.10      | 6.44       | 0.03     | 0.02        | 46.22     | 48.16      | 4.44     | 48.36     |
| 150           | 547.86          | 5.50     | 0.07       | 0.24    | 7.09        | 0.14      | 7.25       | 0.04     | 0.02        | 40.02     | 41.38      | 4.73     | 41.65     |
| 160           | 627.63          | 7.04     | 0.05       | 0.31    | 3.75        | 0.21      | 7.35       | 0.04     | 0.04        | 34.88     | 35.87      | 6.90     | 36.53     |

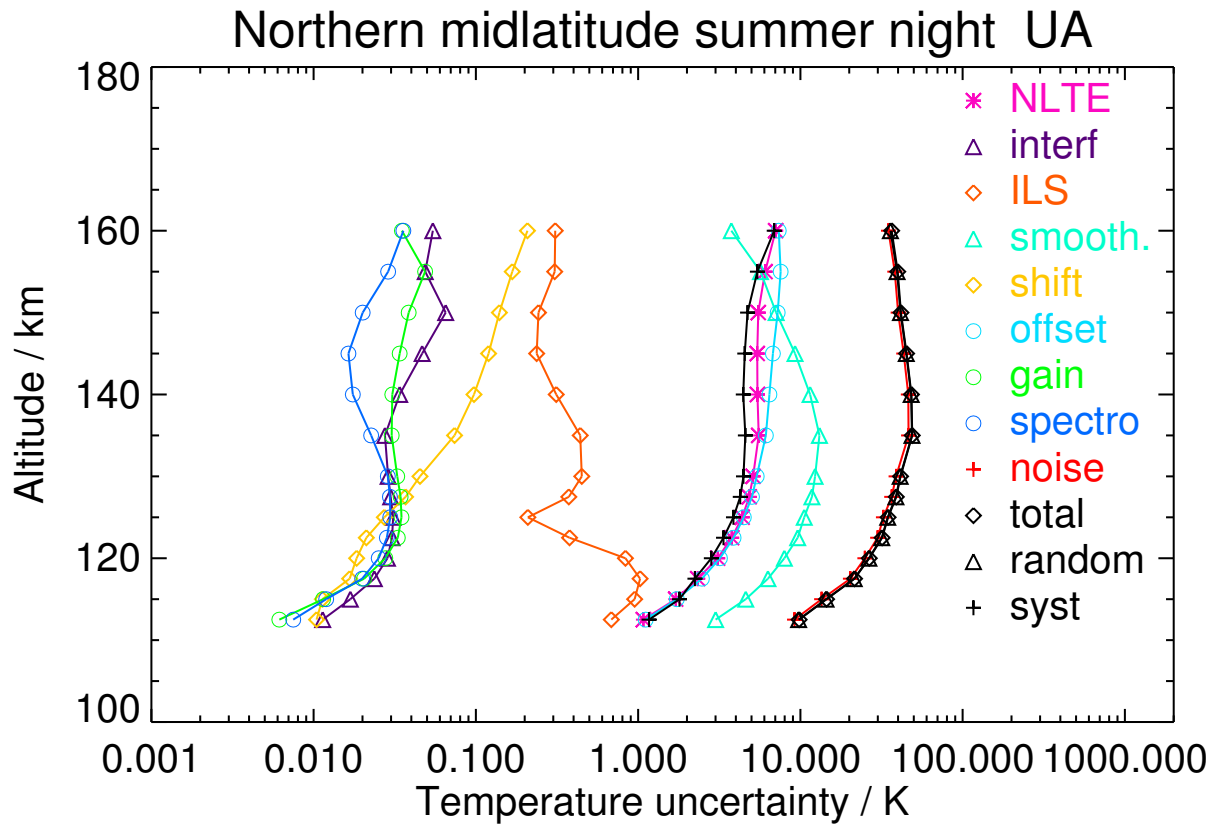

**Figure S184.** V8R\_TwNO\_662 Northern midlatitude summer night

**Table S186.** Temperature error budget for Northern midlatitude autumn day. All uncertainties are  $1\sigma$ .

| altitude (km) | mean target (K) | NLTE (K) | interf (K) | ILS (K) | smooth. (K) | shift (K) | offset (K) | gain (K) | spectro (K) | noise (K) | random (K) | syst (K) | total (K) |
|---------------|-----------------|----------|------------|---------|-------------|-----------|------------|----------|-------------|-----------|------------|----------|-----------|
| 110           | 279.37          | 4.09     | <0.01      | 0.79    | 3.85        | 0.02      | 0.87       | 0.04     | <0.01       | 7.67      | 8.94       | 3.44     | 9.58      |
| 120           | 364.06          | 7.43     | 0.02       | 0.90    | 8.37        | 0.08      | 2.90       | 0.04     | <0.01       | 23.52     | 25.30      | 6.88     | 26.22     |
| 130           | 451.68          | 12.30    | 0.03       | 0.33    | 13.06       | 0.15      | 5.12       | 0.05     | <0.01       | 37.58     | 40.46      | 11.12    | 41.96     |
| 140           | 494.54          | 18.55    | 0.07       | 0.41    | 17.31       | 0.23      | 7.46       | 0.06     | <0.01       | 49.90     | 53.88      | 16.90    | 56.47     |
| 150           | 549.36          | 18.77    | 0.10       | 0.53    | 14.81       | 0.31      | 8.29       | 0.07     | 0.02        | 47.62     | 51.10      | 17.25    | 53.93     |
| 160           | 609.78          | 16.05    | 0.07       | 0.51    | 9.20        | 0.34      | 8.48       | 0.06     | 0.03        | 43.60     | 45.63      | 15.27    | 48.12     |
| 170           | 647.26          | 13.01    | 0.09       | 0.46    | 4.81        | 0.35      | 8.25       | 0.06     | 0.03        | 39.33     | 40.64      | 12.51    | 42.52     |
| 180           | 630.85          | 9.62     | 0.06       | 0.51    | 5.14        | 0.43      | 8.69       | 0.08     | 0.03        | 38.78     | 40.09      | 9.54     | 41.21     |

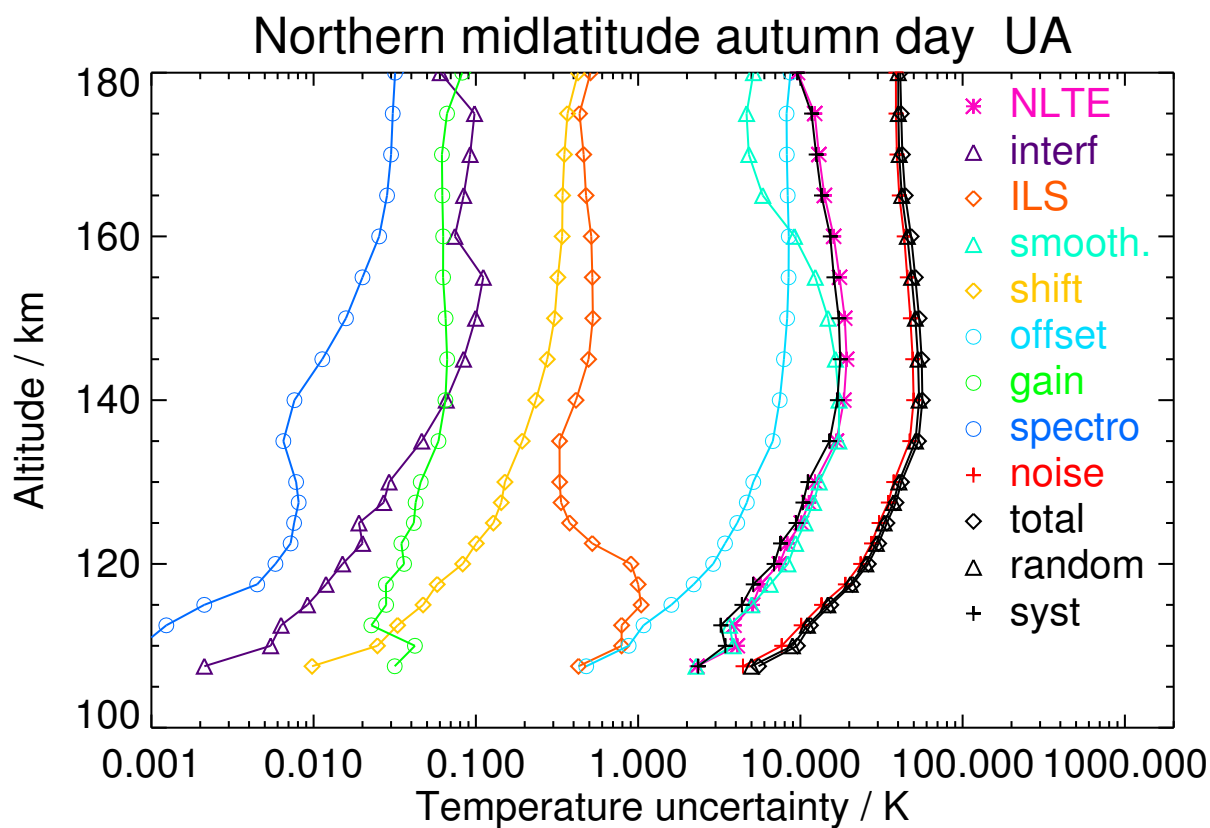

**Figure S185.** V8R\_TwNO\_662 Northern midlatitude autumn day

**Table S187.** Temperature error budget for Northern midlatitude autumn night. All uncertainties are  $1\sigma$ .

| altitude (km) | mean target (K) | NLTE (K) | interf (K) | ILS (K) | smooth. (K) | shift (K) | offset (K) | gain (K) | spectro (K) | noise (K) | random (K) | syst (K) | total (K) |
|---------------|-----------------|----------|------------|---------|-------------|-----------|------------|----------|-------------|-----------|------------|----------|-----------|
| 110           | 268.62          | 3.71     | <0.01      | 0.71    | 4.22        | 0.02      | 0.73       | 0.02     | <0.01       | 7.65      | 8.91       | 3.40     | 9.54      |
| 120           | 344.58          | 6.29     | 0.02       | 0.74    | 8.28        | 0.07      | 2.60       | 0.03     | 0.01        | 23.61     | 25.52      | 4.65     | 25.94     |
| 130           | 445.89          | 9.70     | 0.03       | 0.18    | 9.60        | 0.14      | 4.40       | 0.04     | 0.02        | 35.61     | 37.85      | 6.39     | 38.39     |
| 140           | 530.24          | 12.67    | 0.07       | 0.31    | 10.74       | 0.17      | 6.49       | 0.06     | 0.01        | 44.21     | 46.96      | 8.23     | 47.67     |
| 150           | 592.25          | 14.08    | 0.17       | 0.33    | 9.31        | 0.22      | 7.42       | 0.06     | 0.02        | 42.17     | 44.79      | 10.61    | 46.03     |
| 160           | 638.17          | 13.75    | 0.25       | 0.38    | 6.54        | 0.27      | 7.63       | 0.05     | 0.02        | 39.21     | 41.17      | 11.51    | 42.75     |
| 170           | 675.04          | 15.29    | 0.04       | 0.48    | 4.84        | 0.35      | 6.55       | 0.03     | 0.02        | 37.82     | 38.79      | 15.05    | 41.60     |

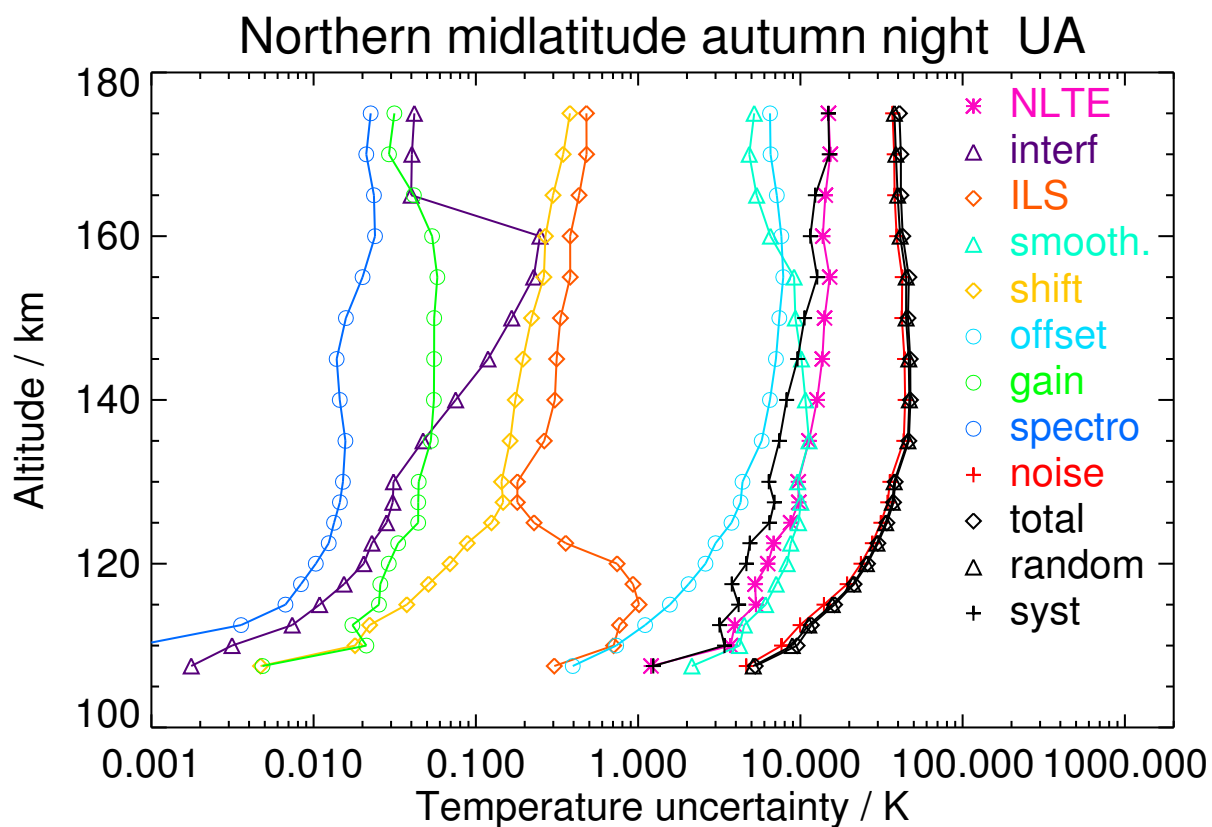

**Figure S186.** V8R\_TwNO\_662 Northern midlatitude autumn night

**Table S188.** Temperature error budget for Tropics day. All uncertainties are  $1\sigma$ .

| altitude<br>(km) | mean target<br>(K) | NLTE<br>(K) | interf<br>(K) | ILS<br>(K) | smooth.<br>(K) | shift<br>(K) | offset<br>(K) | gain<br>(K) | spectro<br>(K) | noise<br>(K) | random<br>(K) | syst<br>(K) | total<br>(K) |
|------------------|--------------------|-------------|---------------|------------|----------------|--------------|---------------|-------------|----------------|--------------|---------------|-------------|--------------|
| 110              | 220.13             | 1.73        | <0.01         | 0.17       | 1.21           | 0.02         | 0.67          | <0.01       | <0.01          | 8.41         | 8.56          | 1.56        | 8.70         |
| 120              | 365.44             | 8.97        | 0.02          | 0.77       | 10.17          | 0.07         | 2.86          | 0.02        | <0.01          | 25.07        | 27.35         | 8.57        | 28.66        |
| 130              | 468.37             | 17.57       | 0.03          | 0.21       | 15.48          | 0.19         | 5.36          | 0.03        | 0.01           | 39.67        | 43.10         | 17.12       | 46.37        |
| 140              | 521.36             | 26.30       | 0.07          | 0.41       | 17.87          | 0.35         | 7.30          | 0.04        | <0.01          | 49.84        | 53.78         | 25.63       | 59.57        |
| 150              | 565.05             | 24.60       | 0.12          | 0.46       | 17.01          | 0.37         | 7.67          | 0.04        | 0.02           | 47.73        | 51.52         | 24.03       | 56.85        |
| 160              | 628.73             | 19.39       | 0.13          | 0.43       | 10.47          | 0.35         | 7.59          | 0.04        | 0.03           | 43.49        | 45.59         | 18.89       | 49.35        |
| 170              | 658.77             | 14.72       | 0.13          | 0.38       | 4.95           | 0.33         | 7.06          | 0.04        | 0.03           | 37.90        | 39.05         | 14.23       | 41.56        |
| 180              | 683.78             | 13.78       | 0.17          | 0.57       | 4.82           | 0.39         | 6.71          | 0.04        | 0.04           | 39.06        | 40.16         | 13.10       | 42.24        |

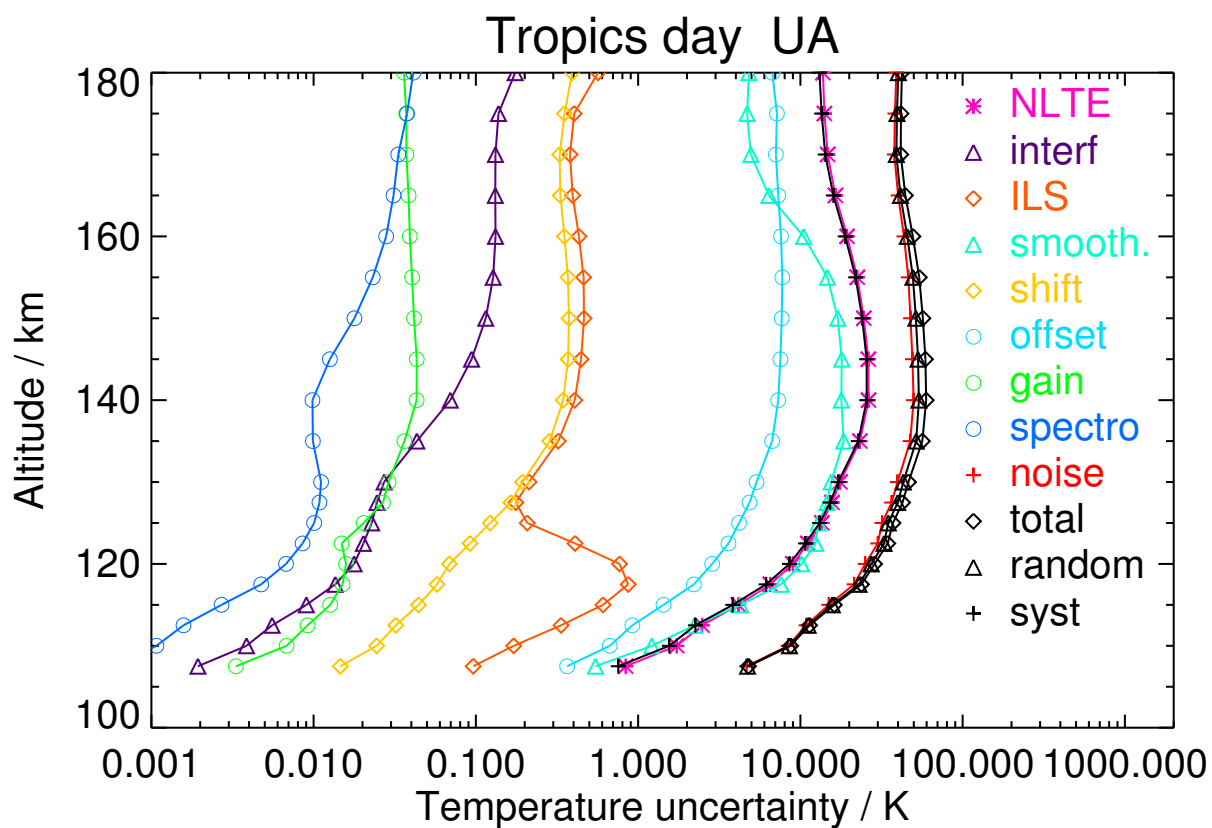

**Figure S187.** V8R\_TwNO\_662 Tropics day



**Table S189.** Temperature error budget for Tropics night. All uncertainties are  $1\sigma$ .

| altitude<br>(km) | mean target<br>(K) | NLTE<br>(K) | interf<br>(K) | ILS<br>(K) | smooth.<br>(K) | shift<br>(K) | offset<br>(K) | gain<br>(K) | spectro<br>(K) | noise<br>(K) | random<br>(K) | syst<br>(K) | total<br>(K) |
|------------------|--------------------|-------------|---------------|------------|----------------|--------------|---------------|-------------|----------------|--------------|---------------|-------------|--------------|
| 120              | 348.14             | 1.82        | 0.02          | 0.42       | 5.81           | 0.01         | 2.44          | 0.02        | 0.02           | 22.24        | 23.13         | 1.66        | 23.19        |
| 130              | 445.15             | 3.63        | 0.04          | 0.29       | 9.45           | 0.02         | 4.77          | 0.03        | 0.04           | 36.46        | 38.01         | 3.22        | 38.14        |
| 140              | 495.23             | 3.79        | 0.03          | 0.30       | 9.04           | 0.03         | 5.53          | 0.02        | 0.03           | 40.76        | 42.17         | 3.22        | 42.29        |
| 150              | 520.78             | 5.11        | 0.02          | 0.10       | 7.43           | 0.07         | 6.46          | 0.03        | 0.02           | 39.82        | 41.05         | 4.84        | 41.33        |

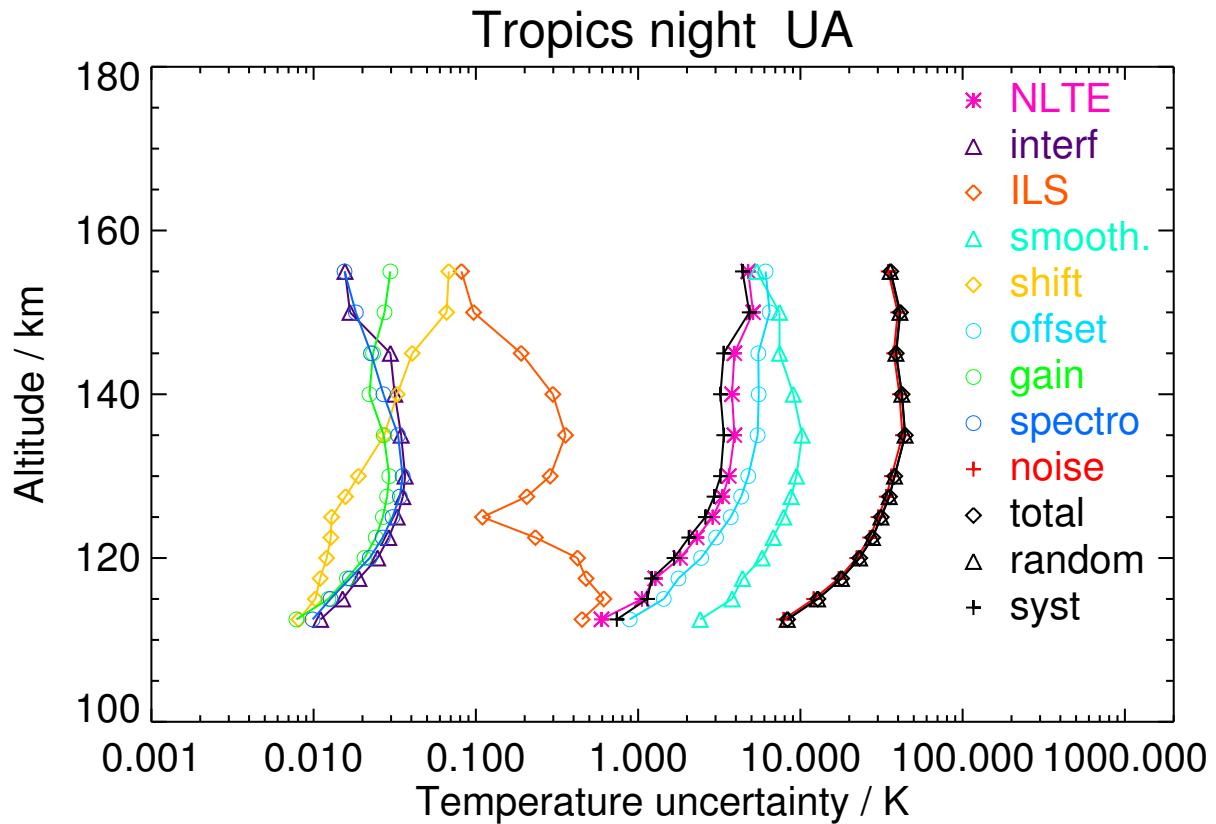

**Figure S188.** V8R\_TwNO\_662 Tropics night

**Table S190.** Temperature error budget for Southern midlatitude winter day. All uncertainties are  $1\sigma$ .

| altitude (km) | mean target (K) | NLTE (K) | interf (K) | ILS (K) | smooth. (K) | shift (K) | offset (K) | gain (K) | spectro (K) | noise (K) | random (K) | syst (K) | total (K) |
|---------------|-----------------|----------|------------|---------|-------------|-----------|------------|----------|-------------|-----------|------------|----------|-----------|
| 110           | 282.18          | 2.07     | <0.01      | 0.51    | 3.07        | 0.01      | 0.82       | <0.01    | <0.01       | 6.58      | 7.36       | 1.95     | 7.61      |
| 120           | 345.26          | 5.77     | <0.01      | 0.88    | 9.15        | 0.06      | 2.69       | 0.03     | <0.01       | 23.46     | 25.44      | 5.29     | 25.99     |
| 130           | 426.33          | 10.26    | 0.02       | 0.29    | 14.07       | 0.14      | 4.96       | 0.04     | <0.01       | 38.13     | 41.10      | 9.63     | 42.21     |
| 140           | 510.84          | 16.58    | 0.06       | 0.53    | 16.82       | 0.26      | 8.17       | 0.05     | 0.01        | 51.70     | 55.22      | 15.76    | 57.43     |
| 150           | 564.03          | 15.89    | 0.10       | 0.59    | 12.87       | 0.29      | 8.82       | 0.06     | 0.02        | 49.00     | 51.69      | 15.04    | 53.83     |
| 160           | 616.07          | 12.56    | 0.11       | 0.51    | 7.12        | 0.27      | 8.50       | 0.06     | 0.03        | 41.34     | 42.99      | 11.88    | 44.61     |
| 170           | 636.15          | 10.41    | 0.09       | 0.45    | 4.32        | 0.30      | 8.73       | 0.06     | 0.03        | 39.28     | 40.60      | 9.89     | 41.79     |
| 180           | 669.64          | 10.69    | 0.17       | 0.39    | 3.45        | 0.32      | 9.45       | 0.09     | 0.04        | 40.62     | 42.02      | 10.01    | 43.19     |

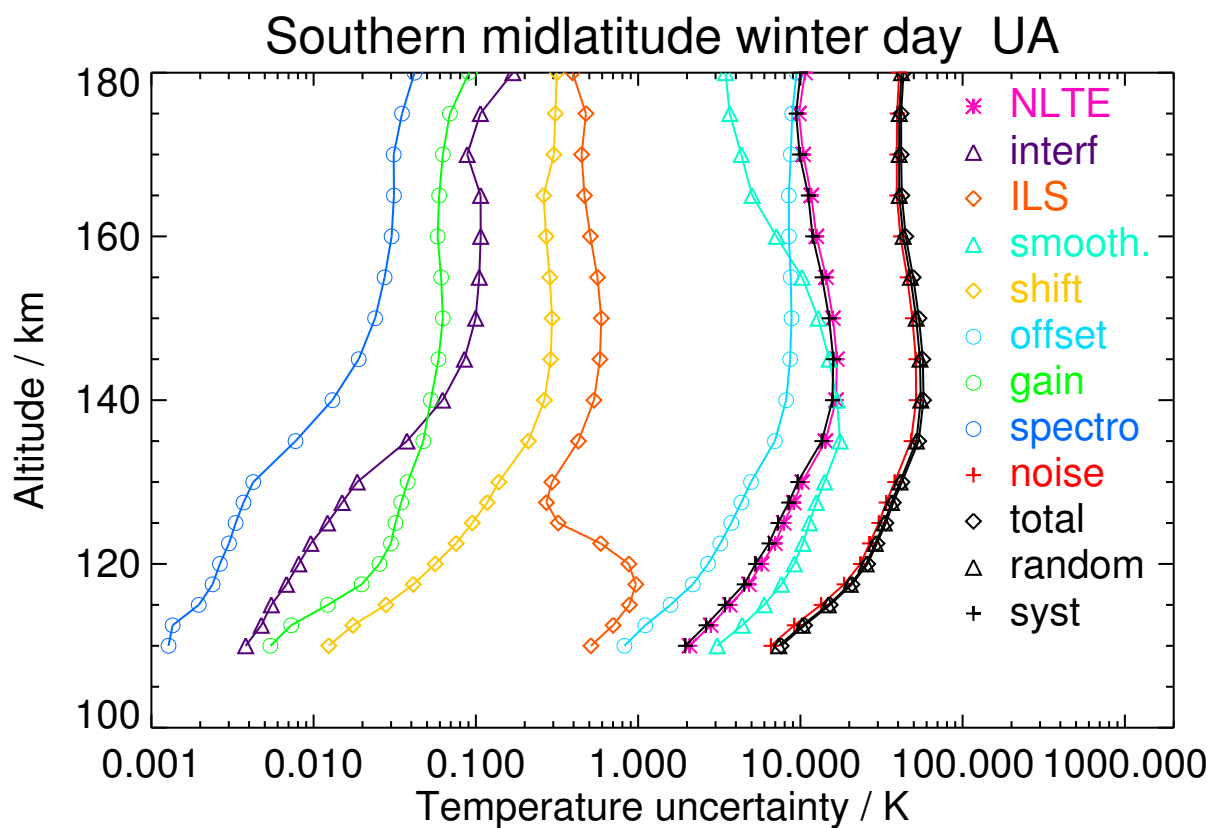

**Figure S189.** V8R\_TwNO\_662 Southern midlatitude winter day

**Table S191.** Temperature error budget for Southern midlatitude winter night. All uncertainties are  $1\sigma$ .

| altitude (km) | mean target (K) | NLTE (K) | interf (K) | ILS (K) | smooth. (K) | shift (K) | offset (K) | gain (K) | spectro (K) | noise (K) | random (K) | syst (K) | total (K) |
|---------------|-----------------|----------|------------|---------|-------------|-----------|------------|----------|-------------|-----------|------------|----------|-----------|
| 110           | 293.08          | 1.89     | <0.01      | 0.60    | 3.16        | 0.02      | 0.92       | <0.01    | <0.01       | 7.37      | 8.15       | 1.62     | 8.31      |
| 120           | 376.86          | 5.67     | 0.01       | 0.87    | 8.90        | 0.07      | 2.92       | 0.02     | 0.01        | 24.28     | 26.32      | 4.16     | 26.65     |
| 130           | 471.53          | 9.68     | 0.02       | 0.29    | 11.31       | 0.16      | 5.04       | 0.05     | 0.01        | 37.02     | 39.68      | 6.62     | 40.22     |
| 140           | 517.57          | 9.30     | 0.02       | 0.37    | 11.55       | 0.18      | 5.85       | 0.05     | <0.01       | 42.43     | 44.83      | 6.69     | 45.32     |
| 150           | 557.13          | 9.31     | 0.03       | 0.42    | 9.67        | 0.26      | 5.69       | 0.05     | <0.01       | 37.48     | 39.43      | 7.96     | 40.22     |
| 160           | 601.19          | 9.49     | 0.04       | 0.65    | 9.41        | 0.51      | 7.23       | 0.06     | 0.03        | 40.17     | 42.16      | 8.21     | 42.95     |
| 170           | 595.23          | 1.80     | 0.06       | 0.61    | 6.25        | 0.55      | 8.94       | 0.06     | 0.04        | 41.51     | 42.92      | 1.90     | 42.96     |
| 180           | 614.15          | 1.66     | 0.06       | 0.51    | 5.74        | 0.49      | 8.45       | 0.05     | 0.04        | 38.93     | 40.25      | 1.73     | 40.29     |

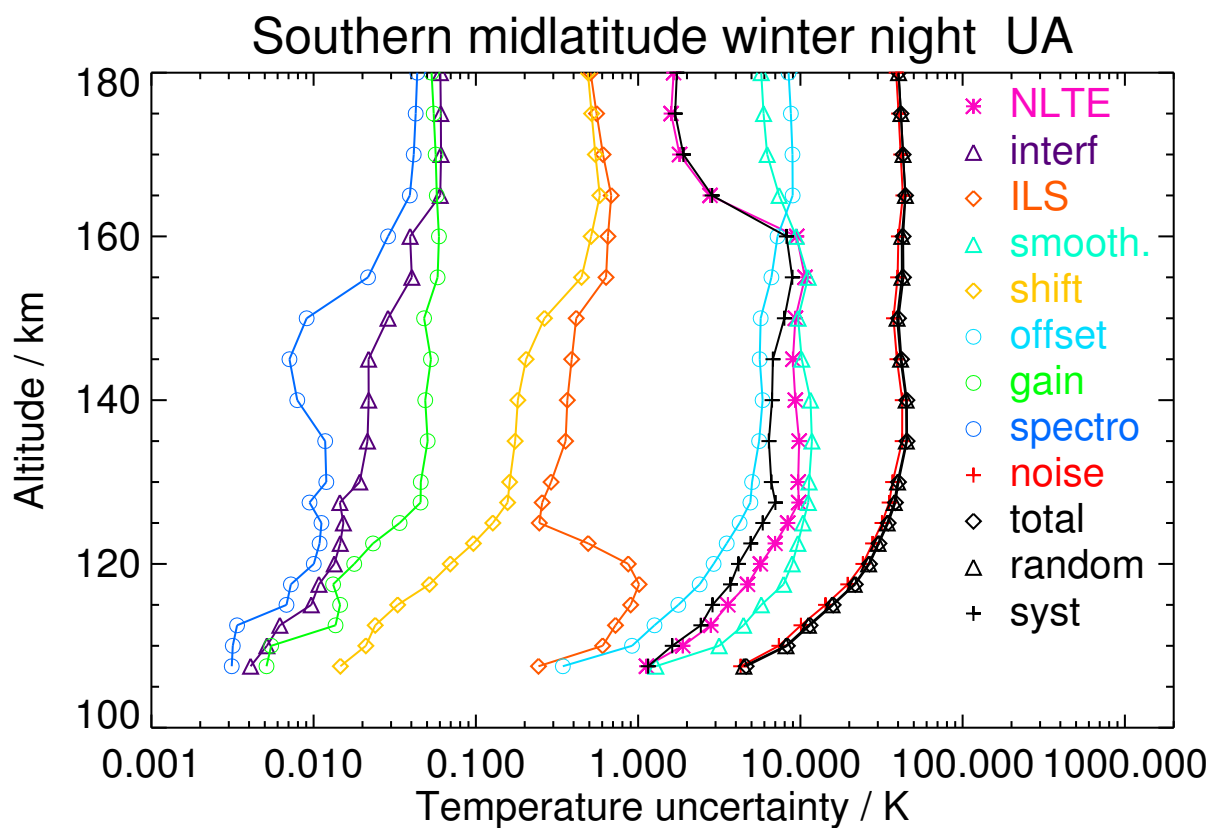

**Figure S190.** V8R\_TwNO\_662 Southern midlatitude winter night

**Table S192.** Temperature error budget for Southern midlatitude spring day. All uncertainties are  $1\sigma$ .

| altitude (km) | mean target (K) | NLTE (K) | interf (K) | ILS (K) | smooth. (K) | shift (K) | offset (K) | gain (K) | spectro (K) | noise (K) | random (K) | syst (K) | total (K) |
|---------------|-----------------|----------|------------|---------|-------------|-----------|------------|----------|-------------|-----------|------------|----------|-----------|
| 110           | 267.90          | 4.15     | <0.01      | 0.54    | 2.83        | 0.06      | 0.78       | 0.01     | <0.01       | 8.10      | 8.78       | 3.84     | 9.58      |
| 120           | 379.85          | 12.99    | 0.02       | 1.58    | 11.31       | 0.10      | 2.75       | 0.02     | <0.01       | 25.20     | 28.10      | 12.34    | 30.68     |
| 130           | 476.60          | 21.67    | 0.03       | 0.33    | 15.74       | 0.26      | 4.46       | 0.04     | 0.01        | 38.13     | 41.73      | 21.20    | 46.81     |
| 140           | 520.24          | 30.86    | 0.05       | 0.64    | 18.26       | 0.44      | 5.63       | 0.04     | <0.01       | 46.42     | 50.59      | 30.23    | 58.93     |
| 150           | 603.37          | 30.79    | 0.14       | 0.81    | 16.16       | 0.50      | 6.43       | 0.04     | 0.02        | 45.44     | 49.02      | 30.23    | 57.59     |
| 160           | 658.63          | 22.56    | 0.26       | 0.84    | 11.41       | 0.44      | 7.18       | 0.05     | 0.03        | 42.09     | 44.48      | 22.02    | 49.63     |
| 170           | 701.88          | 15.96    | 0.28       | 0.83    | 5.12        | 0.41      | 7.59       | 0.05     | 0.04        | 40.82     | 42.18      | 15.07    | 44.79     |
| 180           | 729.33          | 13.57    | 0.35       | 0.91    | 3.95        | 0.45      | 7.62       | 0.05     | 0.04        | 40.39     | 41.85      | 11.80    | 43.48     |

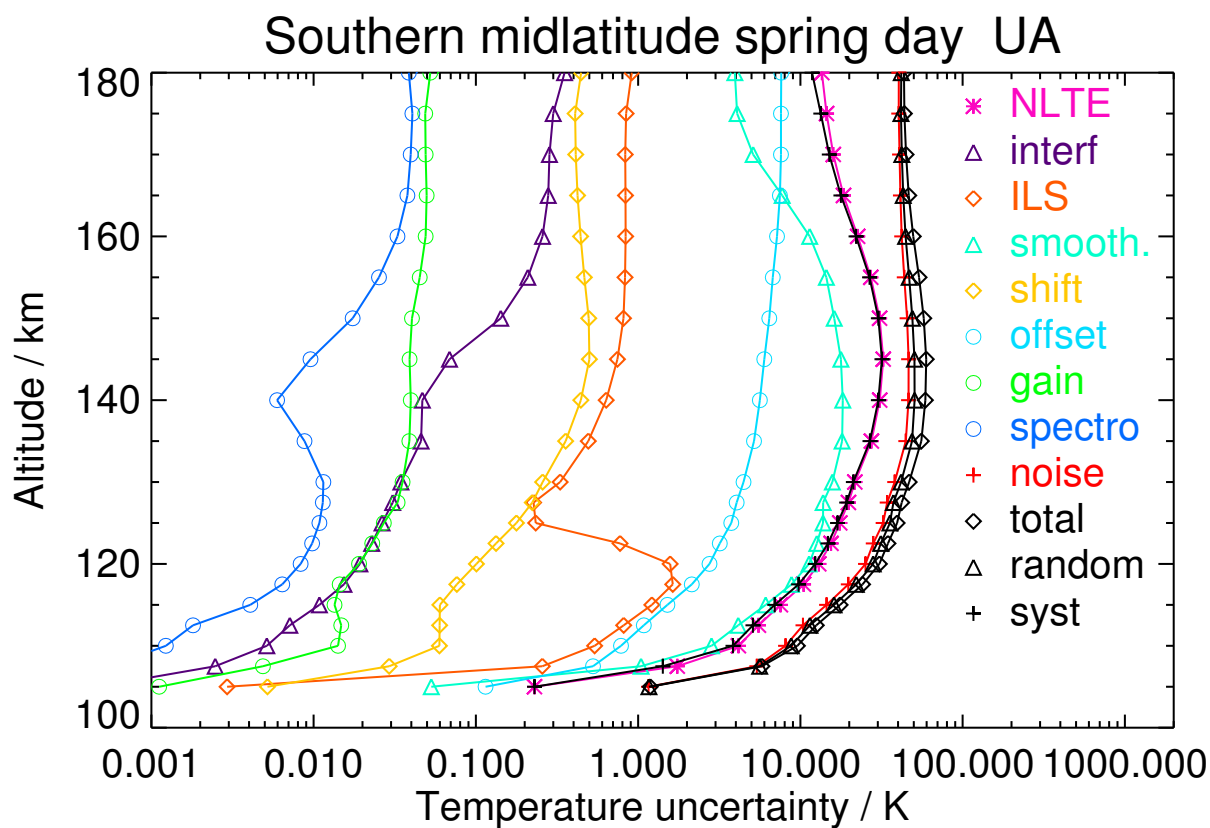

**Figure S191.** V8R\_TwNO\_662 Southern midlatitude spring day

**Table S193.** Temperature error budget for Southern midlatitude spring night. All uncertainties are  $1\sigma$ .

| altitude (km) | mean target (K) | NLTE (K) | interf (K) | ILS (K) | smooth. (K) | shift (K) | offset (K) | gain (K) | spectro (K) | noise (K) | random (K) | syst (K) | total (K) |
|---------------|-----------------|----------|------------|---------|-------------|-----------|------------|----------|-------------|-----------|------------|----------|-----------|
| 110           | 290.75          | 2.66     | <0.01      | 0.75    | 3.57        | 0.02      | 0.94       | <0.01    | <0.01       | 7.80      | 8.74       | 2.38     | 9.06      |
| 120           | 361.36          | 5.81     | 0.03       | 1.04    | 8.14        | 0.06      | 2.83       | 0.03     | 0.02        | 23.72     | 25.58      | 4.17     | 25.91     |
| 130           | 446.04          | 10.00    | 0.05       | 0.31    | 11.21       | 0.17      | 4.92       | 0.05     | 0.03        | 37.79     | 40.35      | 7.09     | 40.97     |
| 140           | 521.35          | 13.44    | 0.07       | 0.51    | 12.64       | 0.26      | 6.53       | 0.05     | 0.02        | 46.45     | 49.51      | 9.47     | 50.41     |
| 150           | 579.48          | 12.63    | 0.23       | 0.45    | 9.88        | 0.22      | 6.58       | 0.04     | 0.02        | 40.53     | 43.00      | 9.70     | 44.08     |
| 160           | 648.03          | 13.62    | 0.75       | 0.50    | 8.47        | 0.35      | 7.66       | 0.07     | 0.02        | 40.65     | 42.87      | 11.46    | 44.37     |
| 170           | 710.55          | 13.29    | 1.15       | 0.56    | 4.93        | 0.49      | 7.70       | 0.10     | 0.03        | 41.05     | 43.07      | 9.56     | 44.12     |
| 180           | 766.88          | 12.79    | 1.36       | 0.57    | 3.63        | 0.52      | 7.76       | 0.10     | 0.03        | 40.76     | 42.85      | 8.09     | 43.60     |

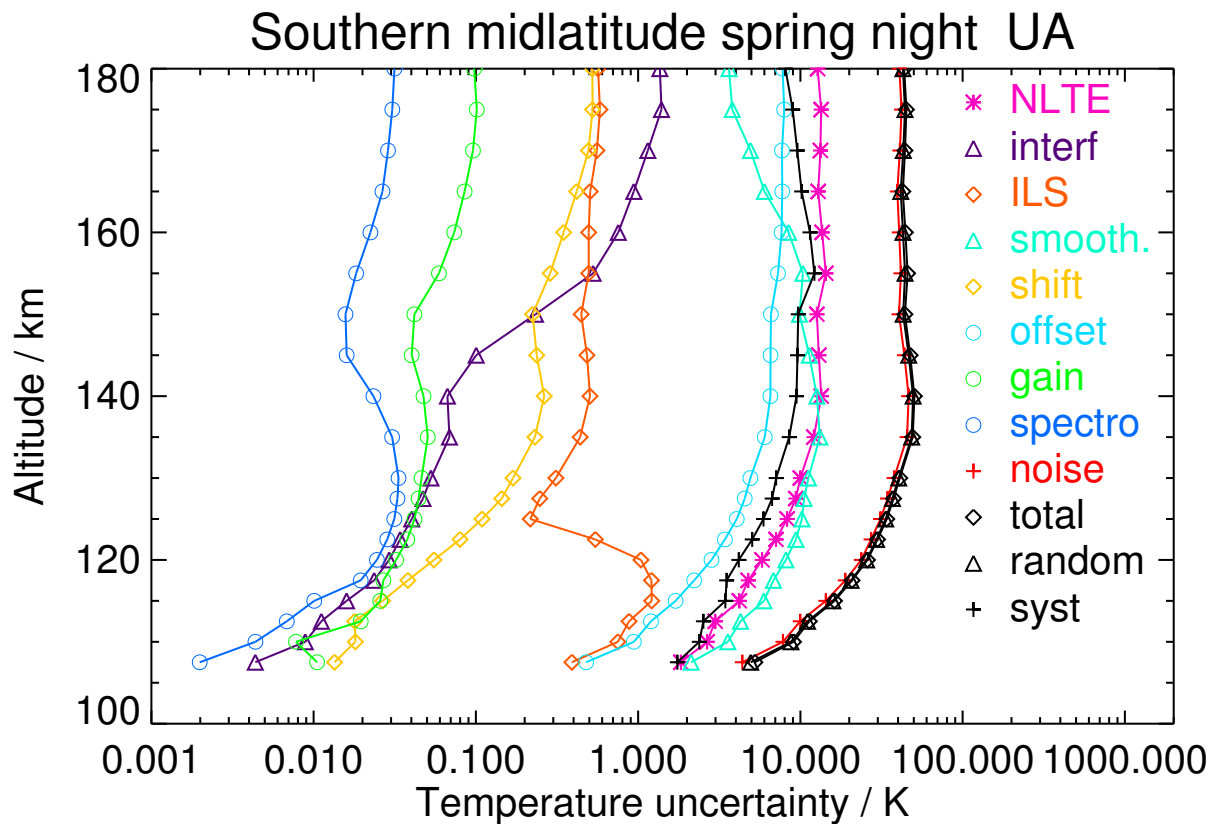

**Figure S192.** V8R\_TwNO\_662 Southern midlatitude spring night

**Table S194.** Temperature error budget for Southern midlatitude summer day. All uncertainties are  $1\sigma$ .

| altitude (km) | mean target (K) | NLTE (K) | interf (K) | ILS (K) | smooth. (K) | shift (K) | offset (K) | gain (K) | spectro (K) | noise (K) | random (K) | syst (K) | total (K) |
|---------------|-----------------|----------|------------|---------|-------------|-----------|------------|----------|-------------|-----------|------------|----------|-----------|
| 110           | 302.15          | 3.27     | <0.01      | 0.96    | 3.20        | 0.01      | 0.82       | <0.01    | <0.01       | 7.39      | 8.16       | 3.23     | 8.78      |
| 120           | 355.30          | 10.45    | 0.03       | 2.15    | 11.93       | 0.07      | 2.74       | 0.03     | <0.01       | 25.50     | 28.51      | 10.05    | 30.23     |
| 130           | 473.07          | 19.43    | 0.04       | 0.59    | 16.21       | 0.24      | 4.82       | 0.04     | 0.02        | 38.76     | 42.56      | 18.83    | 46.54     |
| 140           | 534.80          | 27.27    | 0.10       | 1.02    | 17.73       | 0.49      | 6.30       | 0.04     | 0.01        | 47.37     | 51.27      | 26.72    | 57.82     |
| 150           | 602.15          | 26.17    | 0.26       | 0.99    | 15.91       | 0.50      | 7.19       | 0.04     | 0.02        | 45.99     | 49.50      | 25.61    | 55.73     |
| 160           | 674.70          | 19.53    | 0.36       | 0.81    | 10.47       | 0.37      | 7.94       | 0.04     | 0.04        | 43.62     | 45.79      | 19.01    | 49.58     |
| 170           | 711.31          | 13.98    | 0.39       | 0.65    | 4.79        | 0.29      | 7.99       | 0.04     | 0.05        | 41.13     | 42.37      | 13.41    | 44.44     |
| 180           | 742.84          | 11.47    | 0.49       | 0.64    | 3.72        | 0.29      | 7.94       | 0.05     | 0.06        | 40.09     | 41.25      | 10.70    | 42.61     |

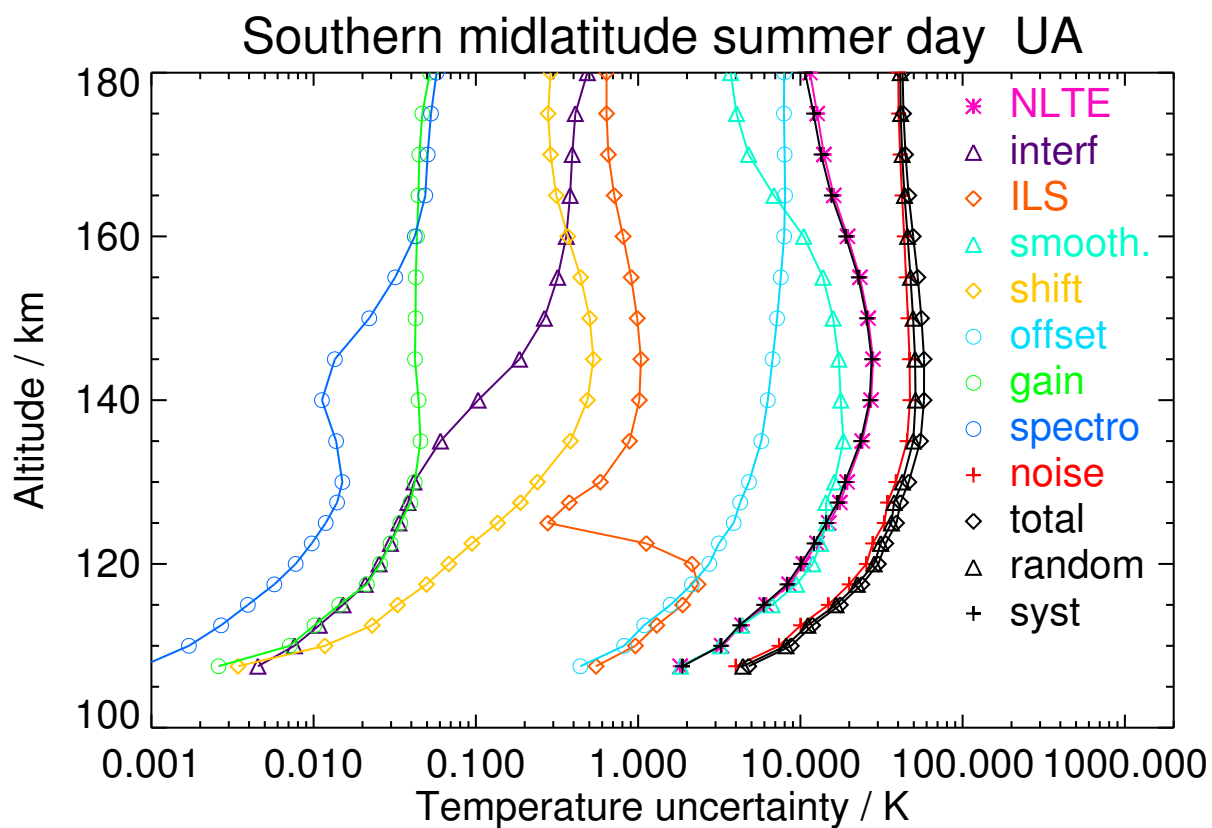

**Figure S193.** V8R\_TwNO\_662 Southern midlatitude summer day

**Table S195.** Temperature error budget for Southern midlatitude summer night. All uncertainties are  $1\sigma$ .

| altitude (km) | mean target (K) | NLTE (K) | interf (K) | ILS (K) | smooth. (K) | shift (K) | offset (K) | gain (K) | spectro (K) | noise (K) | random (K) | syst (K) | total (K) |
|---------------|-----------------|----------|------------|---------|-------------|-----------|------------|----------|-------------|-----------|------------|----------|-----------|
| 110           | 279.27          | 2.04     | <0.01      | 0.71    | 3.31        | <0.01     | 0.95       | <0.01    | <0.01       | 7.33      | 8.20       | 1.73     | 8.38      |
| 120           | 361.13          | 5.27     | 0.02       | 1.29    | 10.43       | 0.04      | 3.75       | 0.02     | 0.02        | 26.69     | 29.03      | 4.68     | 29.41     |
| 130           | 450.28          | 8.46     | 0.02       | 0.47    | 14.59       | 0.14      | 6.39       | 0.02     | 0.02        | 40.67     | 43.89      | 7.33     | 44.50     |
| 140           | 492.42          | 8.27     | 0.03       | 0.41    | 13.43       | 0.18      | 7.04       | 0.03     | 0.02        | 47.74     | 50.30      | 6.88     | 50.77     |
| 150           | 539.05          | 6.80     | 0.04       | 0.32    | 8.75        | 0.18      | 6.48       | 0.03     | 0.02        | 38.82     | 40.44      | 6.01     | 40.89     |
| 160           | 595.87          | 5.92     | 0.13       | 0.25    | 5.38        | 0.19      | 7.43       | 0.05     | 0.03        | 34.66     | 35.97      | 5.24     | 36.35     |

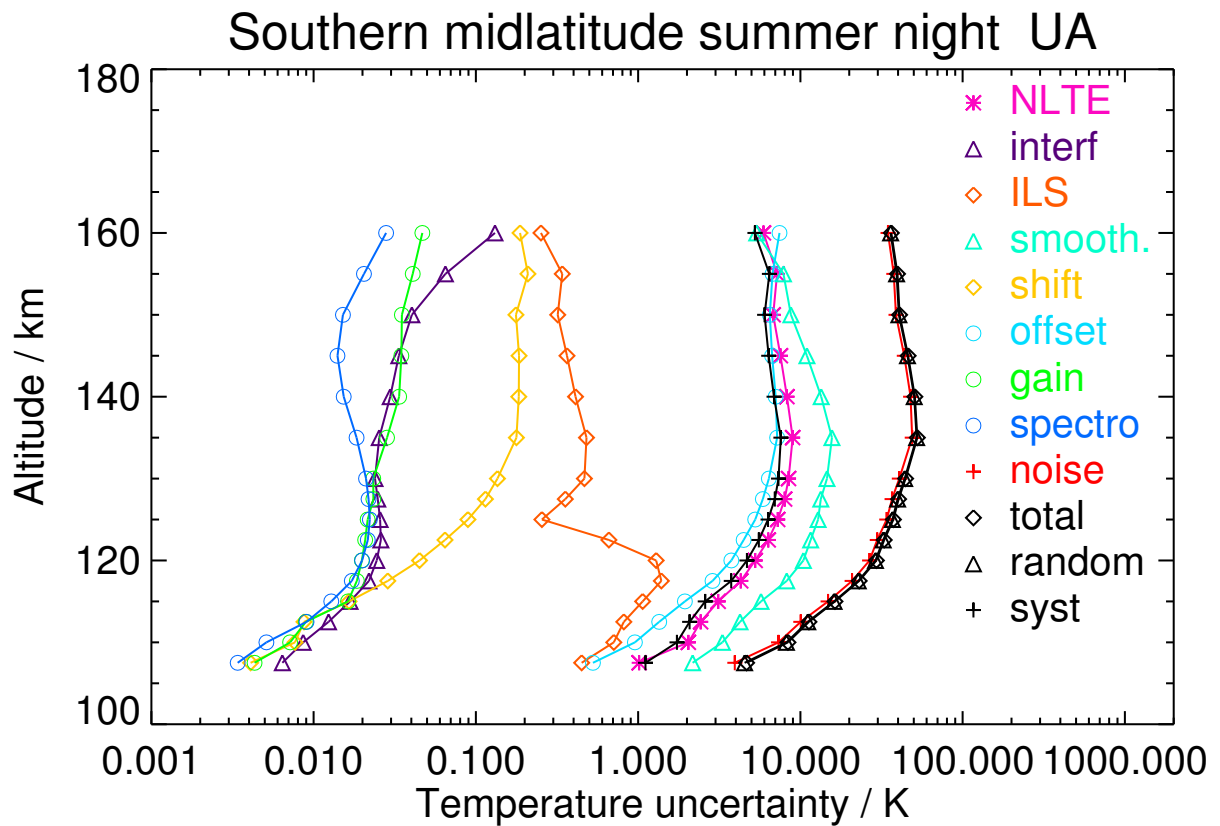

**Figure S194.** V8R\_TwNO\_662 Southern midlatitude summer night

**Table S196.** Temperature error budget for Southern midlatitude autumn day. All uncertainties are  $1\sigma$ .

| altitude (km) | mean target (K) | NLTE (K) | interf (K) | ILS (K) | smooth. (K) | shift (K) | offset (K) | gain (K) | spectro (K) | noise (K) | random (K) | syst (K) | total (K) |
|---------------|-----------------|----------|------------|---------|-------------|-----------|------------|----------|-------------|-----------|------------|----------|-----------|
| 110           | 302.82          | 5.05     | <0.01      | 1.08    | 4.22        | 0.03      | 0.85       | 0.01     | <0.01       | 7.99      | 9.20       | 4.94     | 10.44     |
| 120           | 378.68          | 10.28    | 0.01       | 1.84    | 9.70        | 0.13      | 2.54       | 0.03     | <0.01       | 22.64     | 25.26      | 9.15     | 26.87     |
| 130           | 454.87          | 15.93    | 0.01       | 0.74    | 15.08       | 0.26      | 4.44       | 0.06     | <0.01       | 35.79     | 39.66      | 14.48    | 42.22     |
| 140           | 497.77          | 22.94    | 0.11       | 0.73    | 18.13       | 0.37      | 6.43       | 0.06     | <0.01       | 49.00     | 53.55      | 20.76    | 57.43     |
| 150           | 558.63          | 22.51    | 0.18       | 0.77    | 15.84       | 0.43      | 7.21       | 0.05     | 0.01        | 47.34     | 51.34      | 20.37    | 55.24     |
| 160           | 620.58          | 18.57    | 0.18       | 0.80    | 10.21       | 0.43      | 7.49       | 0.04     | 0.02        | 42.62     | 45.04      | 17.14    | 48.19     |
| 170           | 664.76          | 15.61    | 0.21       | 0.87    | 5.18        | 0.49      | 7.66       | 0.03     | 0.02        | 40.87     | 42.22      | 14.77    | 44.72     |
| 180           | 706.12          | 13.90    | 0.31       | 0.95    | 3.96        | 0.55      | 7.90       | 0.03     | 0.02        | 41.49     | 42.79      | 12.75    | 44.65     |

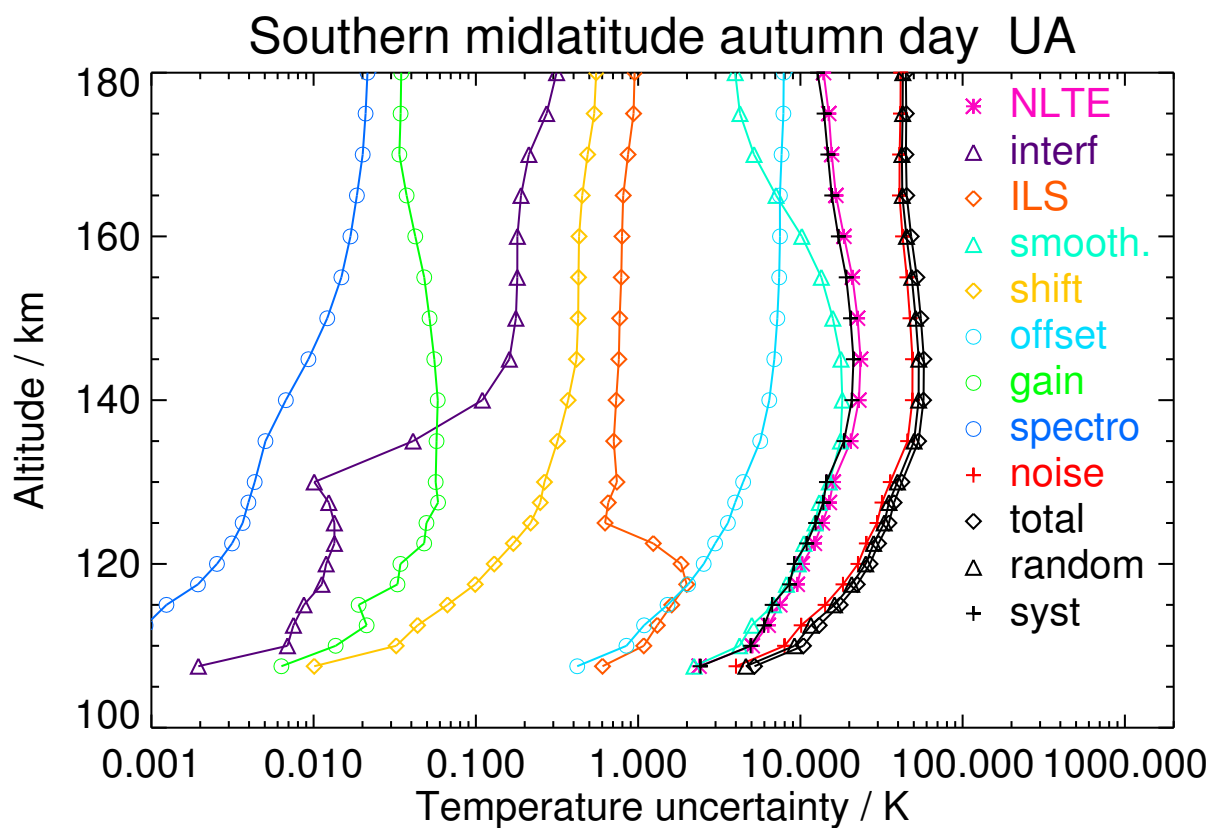

**Figure S195.** V8R\_TwNO\_662 Southern midlatitude autumn day



**Table S197.** Temperature error budget for Southern midlatitude autumn night. All uncertainties are  $1\sigma$ .

| altitude (km) | mean target (K) | NLTE (K) | interf (K) | ILS (K) | smooth. (K) | shift (K) | offset (K) | gain (K) | spectro (K) | noise (K) | random (K) | syst (K) | total (K) |
|---------------|-----------------|----------|------------|---------|-------------|-----------|------------|----------|-------------|-----------|------------|----------|-----------|
| 110           | 279.45          | 2.33     | <0.01      | 0.32    | 3.25        | 0.03      | 0.86       | 0.03     | <0.01       | 7.76      | 8.57       | 1.92     | 8.78      |
| 120           | 366.84          | 8.53     | 0.04       | 0.80    | 9.18        | 0.11      | 2.79       | 0.06     | <0.01       | 24.50     | 27.05      | 5.83     | 27.67     |
| 130           | 473.18          | 13.37    | 0.19       | 0.21    | 11.20       | 0.21      | 4.66       | 0.05     | 0.01        | 35.95     | 39.17      | 9.14     | 40.23     |
| 140           | 556.38          | 16.41    | 0.59       | 0.32    | 11.56       | 0.24      | 6.58       | 0.09     | <0.01       | 44.73     | 48.23      | 11.01    | 49.47     |
| 150           | 627.43          | 17.07    | 0.68       | 0.42    | 8.98        | 0.25      | 6.92       | 0.09     | <0.01       | 43.13     | 46.14      | 12.32    | 47.76     |
| 160           | 665.88          | 15.79    | 0.78       | 0.43    | 6.69        | 0.25      | 7.13       | 0.09     | <0.01       | 40.84     | 43.03      | 12.73    | 44.87     |
| 170           | 685.82          | 18.62    | 1.94       | 0.76    | 3.48        | 0.38      | 6.74       | 0.11     | 0.01        | 44.38     | 47.38      | 11.57    | 48.77     |
| 180           | 722.16          | 13.39    | 0.05       | 0.62    | 3.57        | 0.46      | 7.85       | 0.08     | 0.02        | 43.36     | 44.21      | 13.41    | 46.20     |

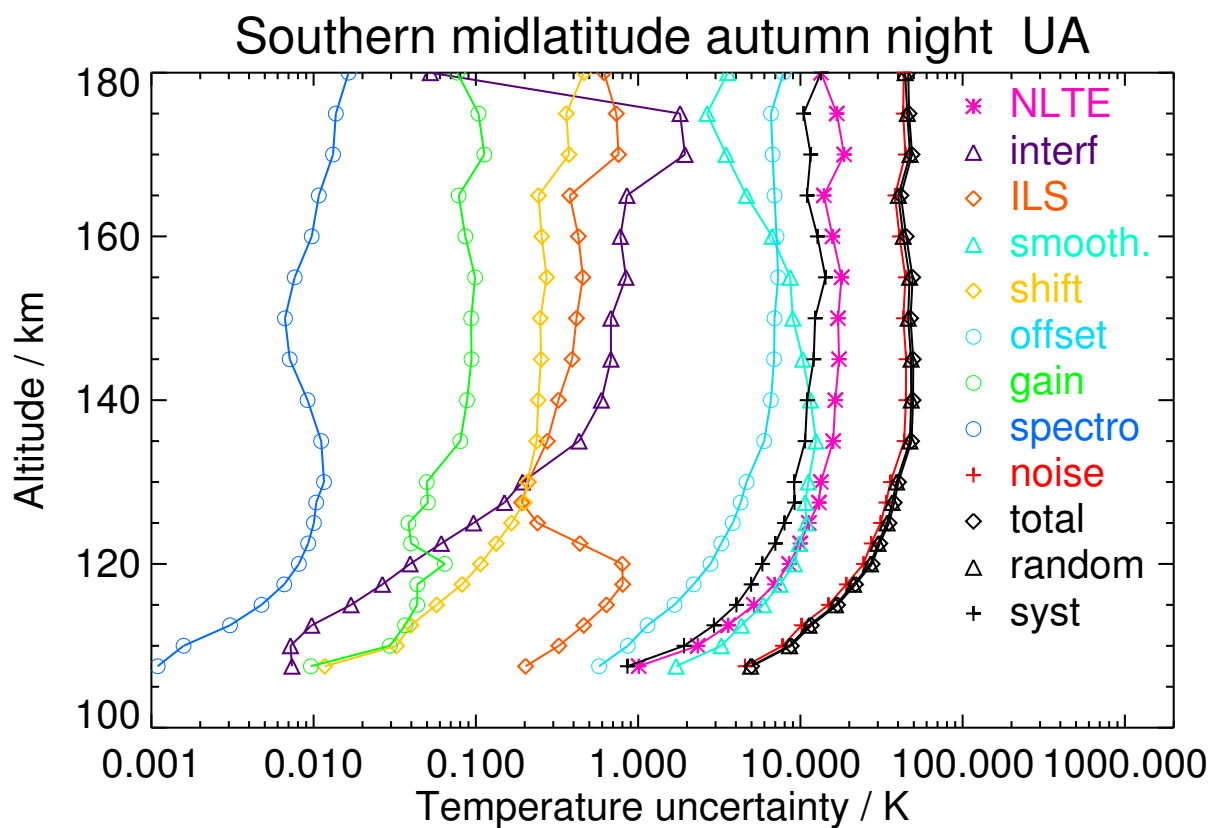

**Figure S196.** V8R\_TwNO\_662 Southern midlatitude autumn night

**Table S198.** Temperature error budget for Southern polar winter day. All uncertainties are  $1\sigma$ .

| altitude<br>(km) | mean target<br>(K) | NLTE<br>(K) | interf<br>(K) | ILS<br>(K) | smooth.<br>(K) | shift<br>(K) | offset<br>(K) | gain<br>(K) | spectro<br>(K) | noise<br>(K) | random<br>(K) | syst<br>(K) | total<br>(K) |
|------------------|--------------------|-------------|---------------|------------|----------------|--------------|---------------|-------------|----------------|--------------|---------------|-------------|--------------|
| 110              | 276.69             | 2.41        | <0.01         | 0.77       | 3.85           | 0.01         | 0.93          | <0.01       | <0.01          | 7.50         | 8.51          | 2.45        | 8.86         |
| 120              | 358.34             | 7.99        | 0.02          | 1.46       | 12.70          | 0.09         | 3.15          | 0.03        | <0.01          | 25.29        | 28.60         | 7.68        | 29.61        |
| 130              | 447.34             | 14.41       | 0.04          | 0.58       | 16.38          | 0.27         | 5.56          | 0.06        | <0.01          | 40.08        | 43.91         | 13.63       | 45.97        |
| 140              | 516.01             | 18.56       | 0.16          | 0.85       | 17.19          | 0.36         | 7.58          | 0.07        | 0.02           | 50.29        | 54.08         | 17.40       | 56.81        |
| 150              | 584.36             | 15.87       | 0.26          | 0.80       | 12.51          | 0.36         | 8.27          | 0.07        | 0.04           | 46.27        | 48.98         | 14.83       | 51.17        |
| 160              | 626.21             | 12.36       | 0.23          | 0.70       | 7.67           | 0.37         | 8.22          | 0.06        | 0.05           | 40.78        | 42.50         | 11.67       | 44.08        |
| 170              | 658.63             | 10.34       | 0.31          | 0.59       | 4.69           | 0.40         | 8.58          | 0.05        | 0.05           | 39.95        | 41.27         | 9.81        | 42.42        |
| 180              | 657.88             | 7.41        | 0.10          | 0.62       | 4.77           | 0.49         | 8.49          | 0.06        | 0.06           | 39.49        | 40.80         | 6.73        | 41.35        |

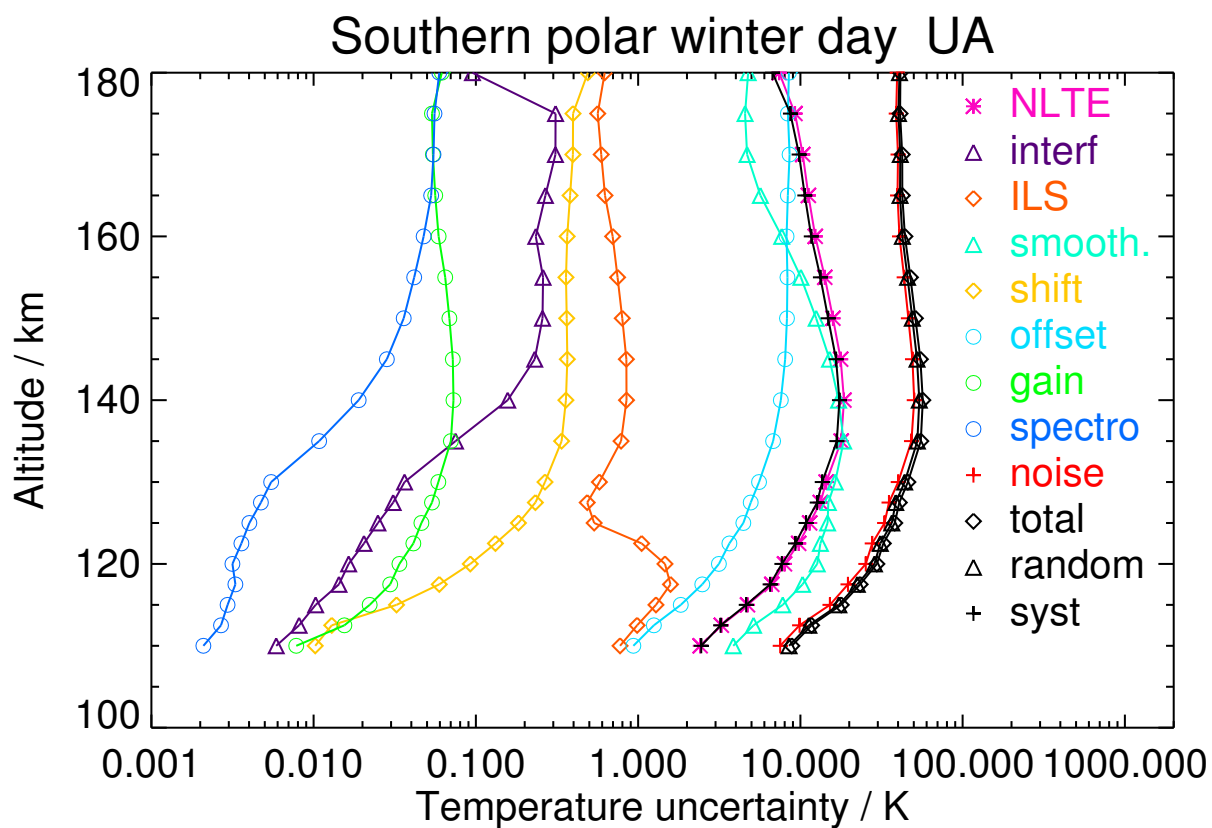

**Figure S197.** V8R\_TwNO\_662 Southern polar winter day

**Table S199.** Temperature error budget for Southern polar winter night. All uncertainties are  $1\sigma$ .

| altitude (km) | mean target (K) | NLTE (K) | interf (K) | ILS (K) | smooth. (K) | shift (K) | offset (K) | gain (K) | spectro (K) | noise (K) | random (K) | syst (K) | total (K) |
|---------------|-----------------|----------|------------|---------|-------------|-----------|------------|----------|-------------|-----------|------------|----------|-----------|
| 110           | 276.19          | 2.08     | <0.01      | 0.54    | 3.66        | 0.01      | 0.96       | <0.01    | <0.01       | 7.96      | 8.85       | 1.97     | 9.07      |
| 120           | 366.78          | 7.09     | <0.01      | 1.05    | 12.27       | 0.09      | 3.56       | 0.02     | <0.01       | 26.25     | 29.33      | 6.59     | 30.06     |
| 130           | 446.61          | 11.81    | 0.01       | 0.36    | 15.60       | 0.22      | 6.27       | 0.04     | <0.01       | 41.62     | 45.12      | 10.90    | 46.42     |
| 140           | 490.64          | 12.22    | 0.02       | 0.55    | 15.54       | 0.28      | 7.19       | 0.04     | 0.02        | 50.81     | 53.80      | 11.38    | 54.99     |
| 150           | 525.72          | 9.57     | 0.02       | 0.47    | 10.28       | 0.26      | 6.42       | 0.03     | 0.02        | 42.11     | 43.94      | 9.03     | 44.85     |
| 160           | 525.89          | 7.34     | 0.03       | 0.48    | 7.09        | 0.29      | 6.54       | 0.04     | 0.03        | 33.82     | 35.24      | 7.00     | 35.93     |

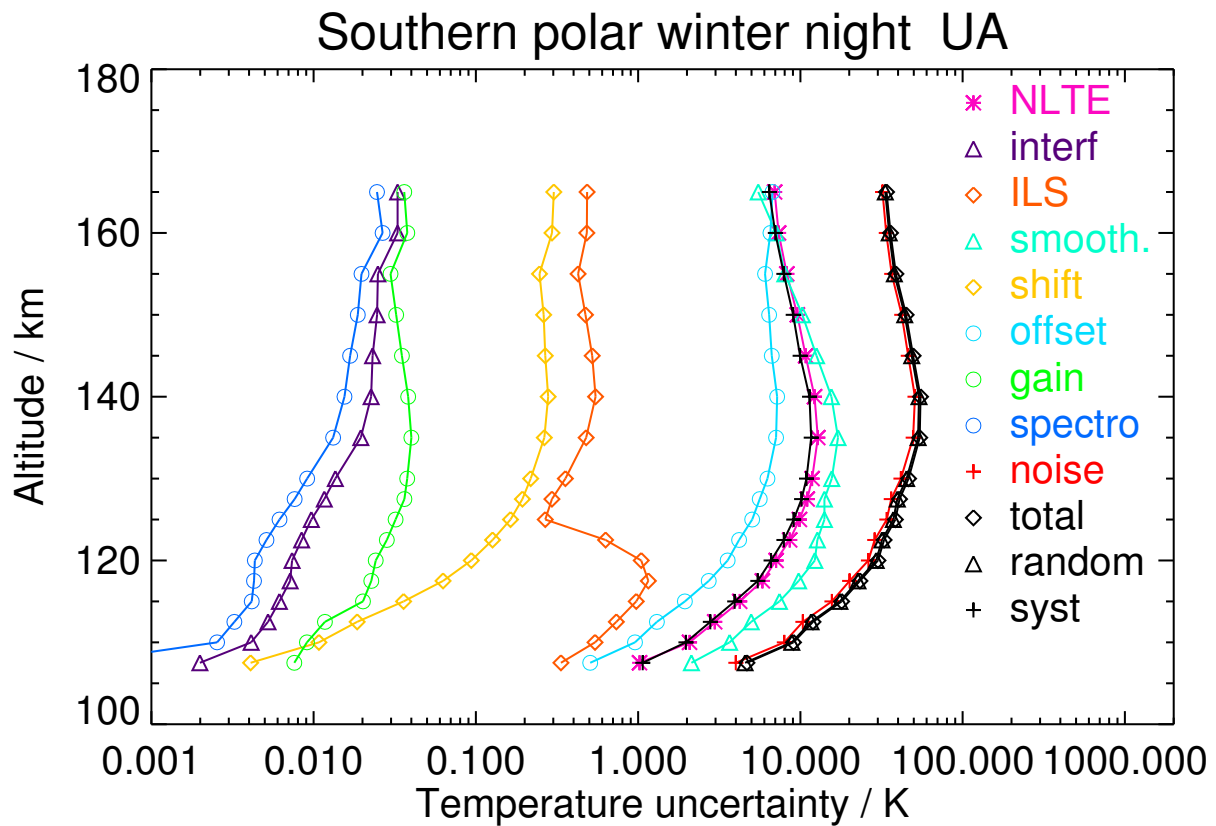

**Figure S198.** V8R\_TwNO\_662 Southern polar winter night

**Table S200.** Temperature error budget for Southern polar spring day. All uncertainties are  $1\sigma$ .

| altitude (km) | mean target (K) | NLTE (K) | interf (K) | ILS (K) | smooth. (K) | shift (K) | offset (K) | gain (K) | spectro (K) | noise (K) | random (K) | syst (K) | total (K) |
|---------------|-----------------|----------|------------|---------|-------------|-----------|------------|----------|-------------|-----------|------------|----------|-----------|
| 110           | 302.24          | 5.16     | <0.01      | 1.38    | 3.98        | 0.03      | 0.79       | 0.02     | <0.01       | 7.68      | 8.92       | 4.94     | 10.20     |
| 120           | 422.51          | 14.98    | 0.03       | 3.20    | 11.43       | 0.13      | 2.51       | 0.04     | <0.01       | 23.74     | 26.93      | 14.47    | 30.58     |
| 130           | 501.15          | 20.22    | 0.06       | 1.11    | 15.07       | 0.35      | 3.65       | 0.06     | 0.01        | 35.84     | 39.31      | 19.76    | 43.99     |
| 140           | 548.02          | 28.30    | 0.14       | 0.85    | 16.96       | 0.52      | 4.91       | 0.06     | <0.01       | 46.65     | 50.33      | 27.51    | 57.35     |
| 150           | 601.93          | 27.41    | 0.27       | 0.88    | 16.02       | 0.59      | 5.87       | 0.05     | 0.02        | 45.62     | 49.27      | 26.40    | 55.90     |
| 160           | 662.73          | 19.58    | 0.47       | 0.87    | 11.36       | 0.50      | 7.07       | 0.06     | 0.04        | 42.89     | 45.32      | 18.68    | 49.02     |
| 170           | 708.46          | 13.74    | 0.56       | 0.86    | 5.23        | 0.50      | 7.82       | 0.06     | 0.05        | 42.27     | 43.75      | 12.30    | 45.45     |
| 180           | 746.29          | 11.74    | 0.61       | 0.92    | 3.60        | 0.51      | 7.92       | 0.07     | 0.06        | 41.55     | 42.99      | 9.66     | 44.06     |

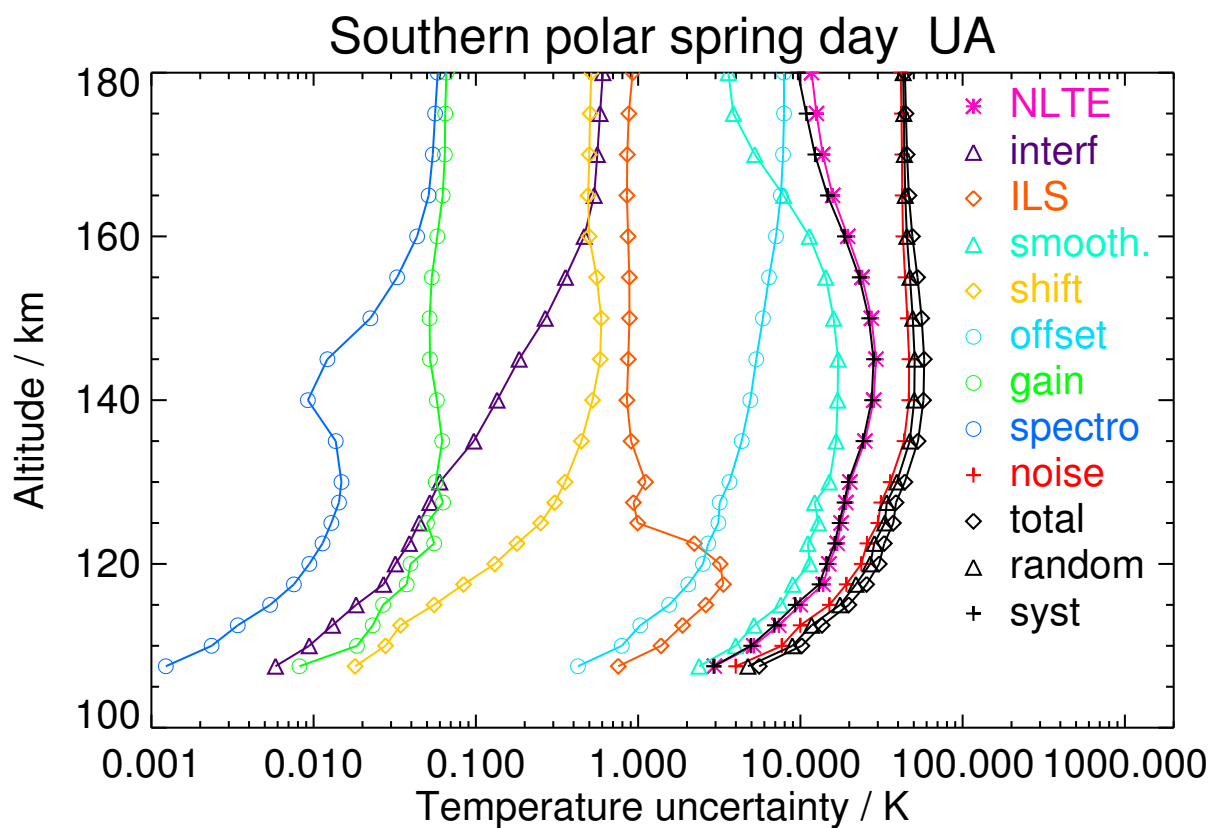

**Figure S199.** V8R\_TwNO\_662 Southern polar spring day

**Table S201.** Temperature error budget for Southern polar spring night. All uncertainties are  $1\sigma$ .

| altitude (km) | mean target (K) | NLTE (K) | interf (K) | ILS (K) | smooth. (K) | shift (K) | offset (K) | gain (K) | spectro (K) | noise (K) | random (K) | syst (K) | total (K) |
|---------------|-----------------|----------|------------|---------|-------------|-----------|------------|----------|-------------|-----------|------------|----------|-----------|
| 110           | 294.07          | 3.68     | <0.01      | 0.85    | 3.70        | 0.02      | 0.88       | 0.02     | <0.01       | 8.09      | 9.13       | 3.29     | 9.71      |
| 120           | 389.93          | 10.17    | 0.03       | 1.66    | 10.30       | 0.09      | 3.10       | 0.03     | 0.03        | 24.21     | 27.16      | 8.38     | 28.43     |
| 130           | 478.73          | 15.85    | 0.05       | 0.62    | 13.89       | 0.26      | 5.14       | 0.06     | 0.03        | 37.63     | 41.42      | 13.09    | 43.44     |
| 140           | 532.46          | 19.58    | 0.13       | 0.63    | 15.01       | 0.39      | 6.57       | 0.05     | 0.02        | 47.65     | 51.67      | 15.91    | 54.06     |
| 150           | 593.82          | 18.36    | 0.21       | 0.62    | 12.06       | 0.40      | 6.68       | 0.04     | 0.02        | 43.94     | 47.18      | 15.24    | 49.58     |
| 160           | 649.22          | 16.63    | 0.16       | 0.62    | 9.57        | 0.47      | 6.87       | 0.04     | 0.03        | 42.02     | 44.19      | 15.14    | 46.71     |
| 170           | 700.73          | 13.21    | 0.18       | 0.57    | 4.81        | 0.50      | 7.10       | 0.04     | 0.03        | 40.65     | 41.89      | 12.11    | 43.60     |
| 180           | 699.06          | 10.02    | 0.06       | 0.57    | 4.77        | 0.55      | 7.25       | 0.03     | 0.04        | 40.19     | 41.25      | 9.51     | 42.33     |

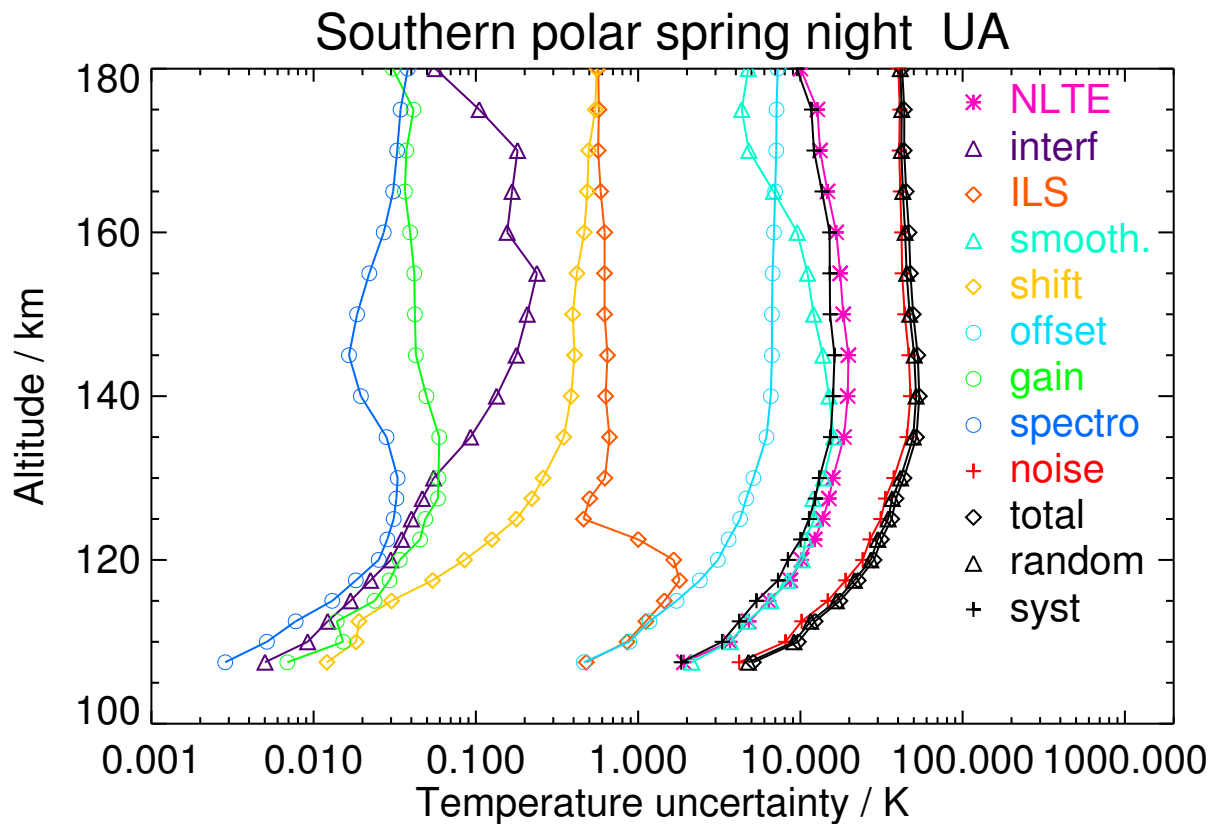

**Figure S200.** V8R\_TwNO\_662 Southern polar spring night

**Table S202.** Temperature error budget for Southern polar summer day. All uncertainties are  $1\sigma$ .

| altitude (km) | mean target (K) | NLTE (K) | interf (K) | ILS (K) | smooth. (K) | shift (K) | offset (K) | gain (K) | spectro (K) | noise (K) | random (K) | syst (K) | total (K) |
|---------------|-----------------|----------|------------|---------|-------------|-----------|------------|----------|-------------|-----------|------------|----------|-----------|
| 110           | 320.65          | 4.23     | 0.01       | 1.86    | 4.20        | 0.05      | 0.91       | 0.01     | <0.01       | 8.02      | 9.25       | 4.31     | 10.20     |
| 120           | 383.15          | 14.09    | 0.04       | 4.59    | 12.65       | 0.08      | 2.92       | 0.04     | 0.02        | 23.78     | 27.55      | 13.96    | 30.88     |
| 130           | 475.55          | 20.46    | 0.09       | 1.88    | 16.06       | 0.29      | 4.30       | 0.06     | 0.03        | 36.60     | 40.64      | 19.67    | 45.15     |
| 140           | 551.83          | 22.74    | 0.20       | 1.68    | 16.13       | 0.78      | 5.17       | 0.05     | 0.02        | 46.83     | 50.24      | 21.84    | 54.78     |
| 150           | 627.36          | 20.00    | 0.40       | 1.24    | 13.36       | 0.74      | 6.01       | 0.07     | 0.04        | 44.33     | 47.20      | 18.83    | 50.82     |
| 160           | 692.45          | 13.54    | 0.58       | 0.89    | 9.16        | 0.61      | 7.00       | 0.08     | 0.07        | 41.06     | 43.11      | 12.07    | 44.76     |
| 170           | 733.77          | 9.15     | 0.59       | 0.76    | 4.32        | 0.56      | 7.65       | 0.09     | 0.08        | 41.77     | 43.11      | 6.94     | 43.67     |
| 180           | 763.93          | 7.85     | 0.48       | 0.77    | 3.23        | 0.55      | 7.65       | 0.10     | 0.09        | 41.48     | 42.79      | 4.67     | 43.04     |

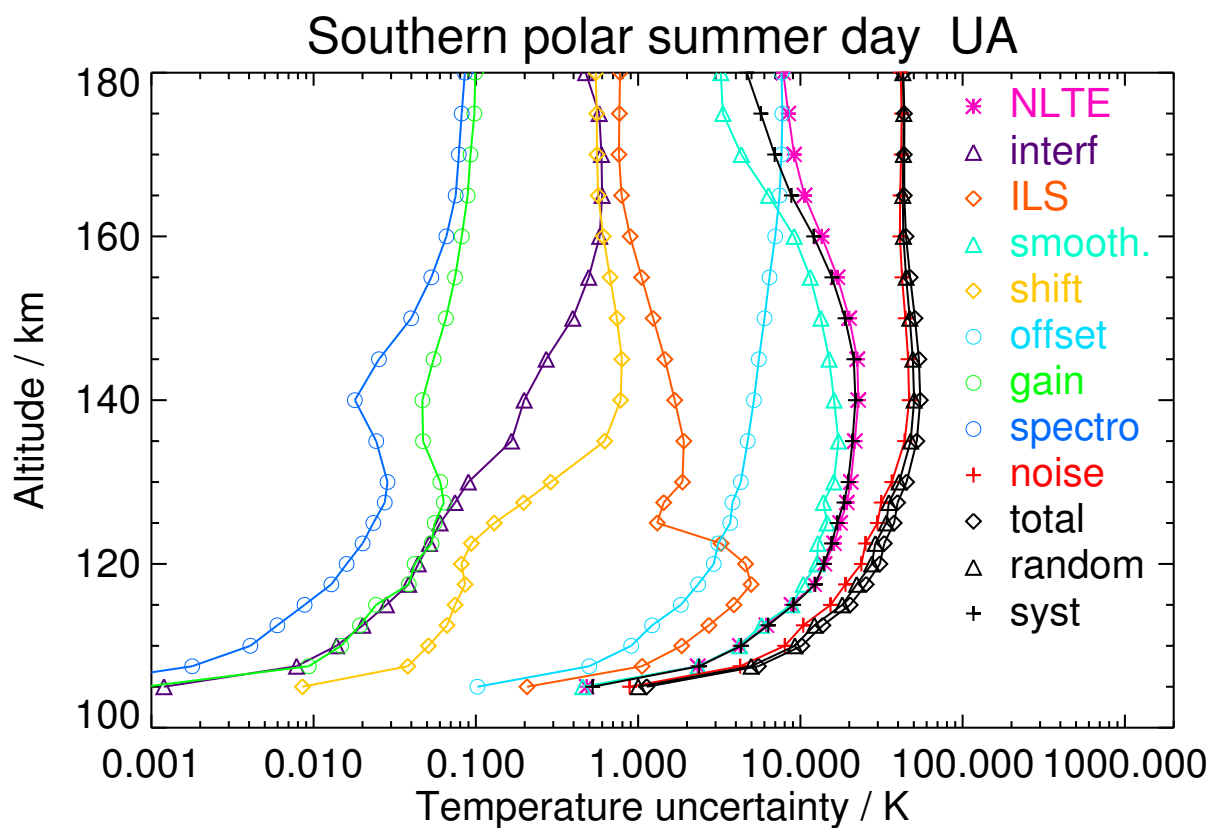

**Figure S201.** V8R\_TwNO\_662 Southern polar summer day

**Table S203.** Temperature error budget for Southern polar summer night. All uncertainties are  $1\sigma$ .

| altitude (km) | mean target (K) | NLTE (K) | interf (K) | ILS (K) | smooth. (K) | shift (K) | offset (K) | gain (K) | spectro (K) | noise (K) | random (K) | syst (K) | total (K) |
|---------------|-----------------|----------|------------|---------|-------------|-----------|------------|----------|-------------|-----------|------------|----------|-----------|
| 110           | 306.77          | 3.33     | 0.01       | 1.11    | 3.32        | 0.01      | 0.94       | 0.02     | <0.01       | 7.65      | 8.71       | 2.62     | 9.09      |
| 120           | 376.99          | 6.86     | 0.03       | 1.97    | 9.17        | 0.08      | 3.29       | 0.04     | 0.02        | 24.46     | 26.72      | 5.48     | 27.28     |
| 130           | 457.01          | 10.88    | 0.06       | 0.64    | 13.29       | 0.22      | 5.69       | 0.06     | 0.03        | 39.12     | 42.20      | 8.81     | 43.11     |
| 140           | 524.43          | 12.96    | 0.15       | 0.64    | 13.37       | 0.25      | 7.09       | 0.06     | 0.02        | 47.36     | 50.46      | 9.67     | 51.38     |
| 150           | 582.05          | 12.91    | 0.42       | 0.55    | 10.20       | 0.23      | 7.31       | 0.07     | 0.02        | 42.69     | 45.27      | 9.88     | 46.34     |
| 160           | 660.15          | 14.41    | 1.10       | 0.75    | 7.22        | 0.40      | 8.29       | 0.14     | 0.03        | 41.52     | 43.95      | 11.08    | 45.32     |
| 170           | 716.71          | 13.79    | 1.39       | 0.88    | 4.05        | 0.56      | 8.54       | 0.19     | 0.05        | 42.13     | 44.20      | 10.19    | 45.36     |
| 180           | 792.35          | 13.50    | 1.83       | 1.11    | 2.87        | 0.64      | 8.29       | 0.20     | 0.04        | 41.78     | 43.66      | 10.18    | 44.83     |

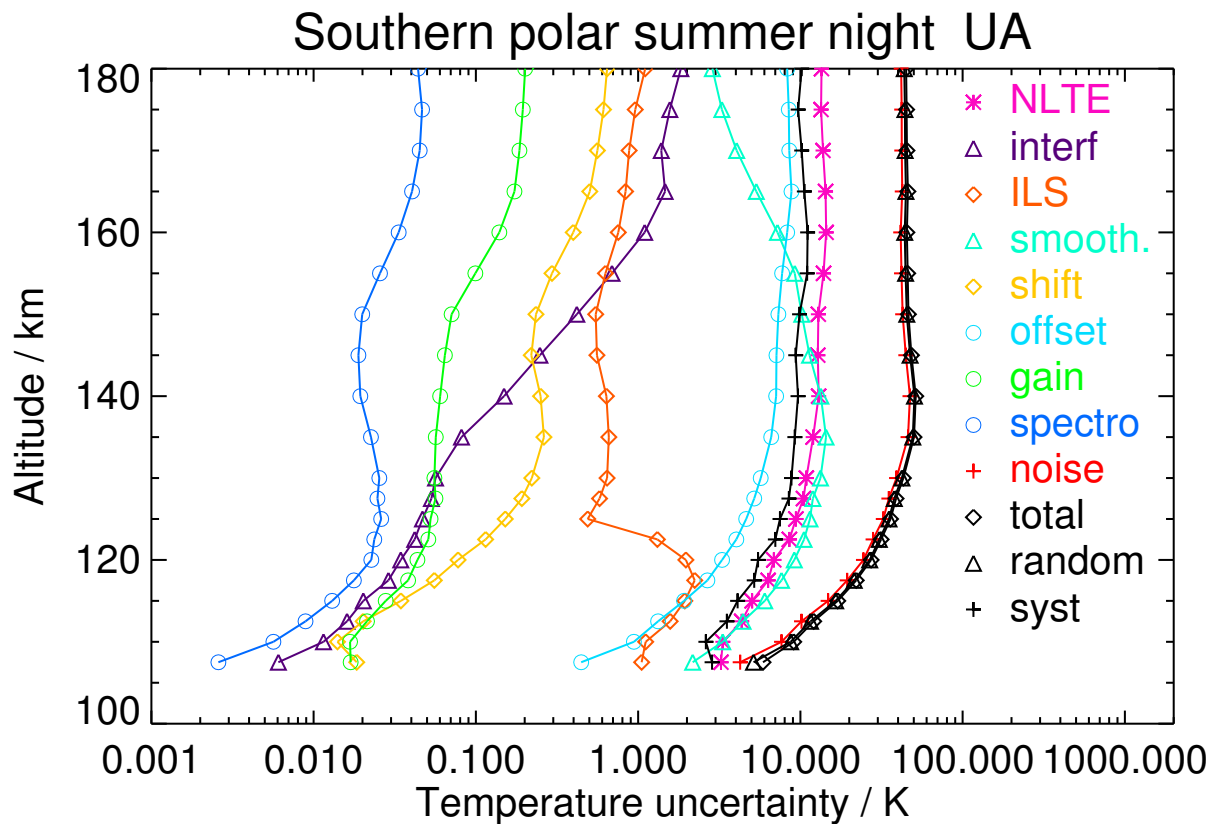

**Figure S202.** V8R\_TwNO\_662 Southern polar summer night

**Table S204.** Temperature error budget for Southern polar autumn day. All uncertainties are  $1\sigma$ .

| altitude<br>(km) | mean target<br>(K) | NLTE<br>(K) | interf<br>(K) | ILS<br>(K) | smooth.<br>(K) | shift<br>(K) | offset<br>(K) | gain<br>(K) | spectro<br>(K) | noise<br>(K) | random<br>(K) | syst<br>(K) | total<br>(K) |
|------------------|--------------------|-------------|---------------|------------|----------------|--------------|---------------|-------------|----------------|--------------|---------------|-------------|--------------|
| 110              | 276.24             | 3.24        | <0.01         | 0.53       | 3.53           | 0.02         | 0.86          | 0.02        | <0.01          | 7.36         | 8.39          | 2.79        | 8.84         |
| 120              | 379.26             | 7.99        | <0.01         | 1.06       | 9.95           | 0.11         | 3.01          | 0.04        | <0.01          | 24.14        | 26.76         | 6.29        | 27.49        |
| 130              | 460.42             | 12.46       | 0.02          | 0.41       | 13.64          | 0.23         | 5.05          | 0.06        | <0.01          | 37.86        | 41.27         | 9.86        | 42.43        |
| 140              | 492.40             | 16.77       | 0.04          | 0.45       | 14.77          | 0.25         | 5.89          | 0.05        | <0.01          | 46.98        | 50.86         | 12.47       | 52.36        |
| 150              | 547.99             | 16.17       | 0.08          | 0.51       | 12.67          | 0.27         | 6.37          | 0.05        | 0.02           | 43.39        | 46.72         | 12.77       | 48.43        |
| 160              | 611.64             | 15.30       | 0.16          | 0.63       | 9.33           | 0.34         | 6.92          | 0.04        | 0.02           | 40.06        | 42.39         | 13.32       | 44.43        |
| 170              | 664.83             | 13.54       | 0.30          | 0.77       | 5.22           | 0.43         | 7.62          | 0.04        | 0.02           | 39.93        | 41.71         | 11.14       | 43.17        |
| 180              | 705.07             | 14.00       | 0.50          | 0.95       | 4.47           | 0.59         | 8.25          | 0.05        | 0.02           | 42.21        | 44.50         | 9.31        | 45.47        |

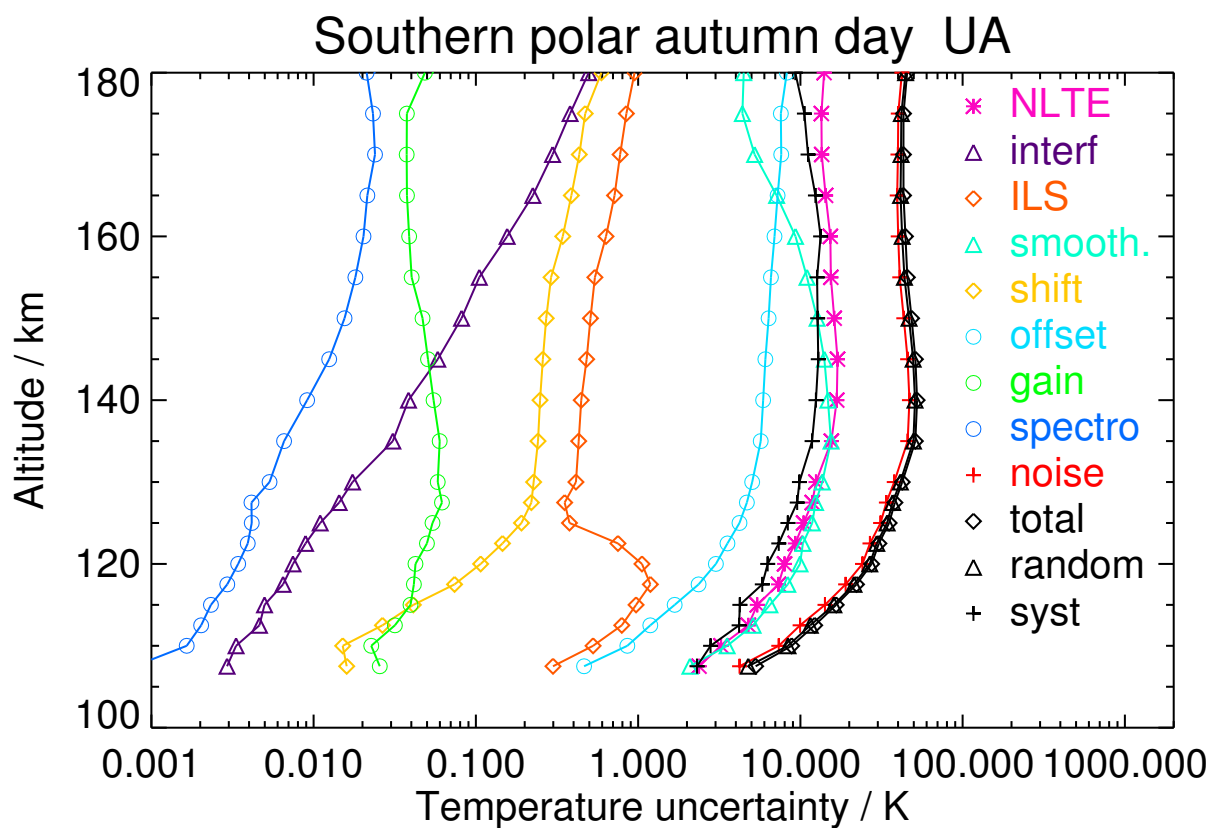

**Figure S203.** V8R\_TwNO\_662 Southern polar autumn day



**Table S205.** Temperature error budget for Southern polar autumn night. All uncertainties are  $1\sigma$ .

| altitude (km) | mean target (K) | NLTE (K) | interf (K) | ILS (K) | smooth. (K) | shift (K) | offset (K) | gain (K) | spectro (K) | noise (K) | random (K) | syst (K) | total (K) |
|---------------|-----------------|----------|------------|---------|-------------|-----------|------------|----------|-------------|-----------|------------|----------|-----------|
| 110           | 271.82          | 3.66     | <0.01      | 0.69    | 4.05        | 0.02      | 0.81       | 0.05     | <0.01       | 8.21      | 9.41       | 3.13     | 9.92      |
| 120           | 376.94          | 11.13    | <0.01      | 1.18    | 11.16       | 0.12      | 2.61       | 0.05     | <0.01       | 22.94     | 26.18      | 9.88     | 27.99     |
| 130           | 476.89          | 19.39    | 0.02       | 0.52    | 14.75       | 0.30      | 4.49       | 0.09     | <0.01       | 36.20     | 40.42      | 17.06    | 43.87     |
| 140           | 519.41          | 24.32    | 0.04       | 0.58    | 16.75       | 0.36      | 6.14       | 0.08     | <0.01       | 47.61     | 52.14      | 21.41    | 56.37     |
| 150           | 557.99          | 21.36    | 0.04       | 0.59    | 15.98       | 0.40      | 6.61       | 0.06     | 0.01        | 47.13     | 50.93      | 19.57    | 54.56     |
| 160           | 601.40          | 16.18    | 0.04       | 0.55    | 10.18       | 0.42      | 6.56       | 0.05     | 0.02        | 40.81     | 42.98      | 15.07    | 45.54     |
| 170           | 625.88          | 13.34    | 0.03       | 0.58    | 5.95        | 0.51      | 6.93       | 0.04     | 0.02        | 37.94     | 39.32      | 12.45    | 41.25     |
| 180           | 631.16          | 14.62    | 0.04       | 0.78    | 5.98        | 0.73      | 7.55       | 0.03     | 0.03        | 40.55     | 41.93      | 13.94    | 44.18     |

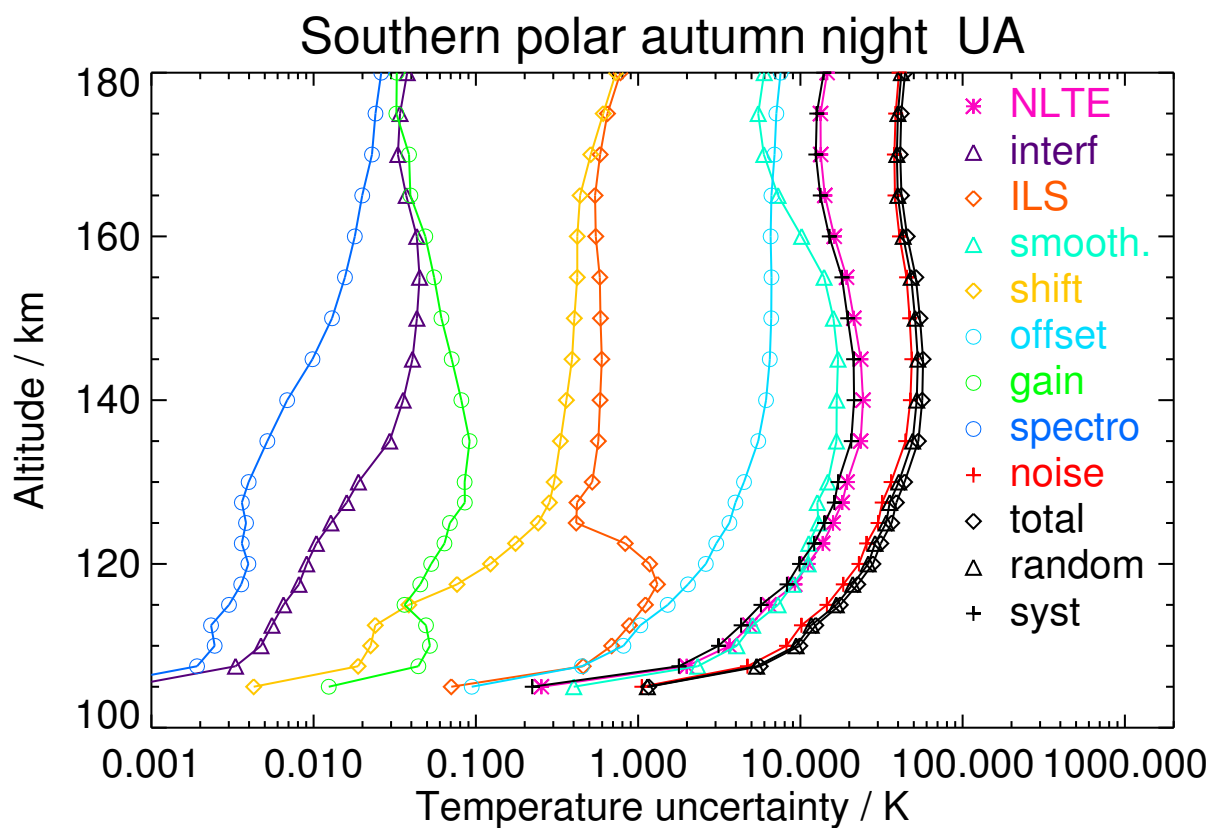

**Figure S204.** V8R\_TwNO\_662 Southern polar autumn night

**Table S206.** Temperature error budget for Northern polar winter day, high solar activity. All uncertainties are  $1\sigma$ .

| altitude (km) | mean target (K) | NLTE (K) | interf (K) | ILS (K) | smooth. (K) | shift (K) | offset (K) | gain (K) | spectro (K) | noise (K) | random (K) | syst (K) | total (K) |
|---------------|-----------------|----------|------------|---------|-------------|-----------|------------|----------|-------------|-----------|------------|----------|-----------|
| 110           | 285.20          | 7.49     | <0.01      | 0.76    | 4.18        | 0.04      | 0.83       | 0.06     | <0.01       | 8.20      | 9.70       | 6.94     | 11.92     |
| 120           | 385.97          | 20.54    | 0.03       | 1.74    | 10.31       | 0.24      | 1.86       | 0.10     | <0.01       | 19.93     | 23.56      | 19.42    | 30.53     |
| 130           | 496.57          | 22.73    | 0.11       | 0.62    | 12.45       | 0.56      | 2.03       | 0.10     | <0.01       | 30.36     | 33.41      | 21.96    | 39.98     |
| 140           | 572.50          | 37.82    | 0.26       | 0.74    | 13.64       | 0.66      | 3.03       | 0.09     | <0.01       | 42.33     | 45.19      | 37.10    | 58.47     |
| 150           | 684.48          | 39.52    | 0.53       | 0.93    | 11.84       | 0.62      | 3.85       | 0.08     | <0.01       | 42.31     | 45.00      | 38.52    | 59.23     |
| 160           | 752.12          | 31.08    | 1.02       | 0.99    | 8.77        | 0.37      | 5.01       | 0.09     | 0.02        | 36.91     | 39.33      | 29.76    | 49.32     |
| 170           | 798.26          | 22.79    | 1.36       | 1.26    | 3.64        | 0.50      | 6.38       | 0.12     | 0.02        | 37.55     | 39.49      | 20.66    | 44.57     |
| 180           | 837.75          | 20.31    | 1.57       | 1.60    | 2.27        | 0.64      | 6.93       | 0.13     | 0.02        | 38.42     | 40.57      | 17.35    | 44.13     |

**S7** Temperature error contribution profile plots and tabulated values for RR UA data (V8R\_TwNO\_662) at high solar activity conditions

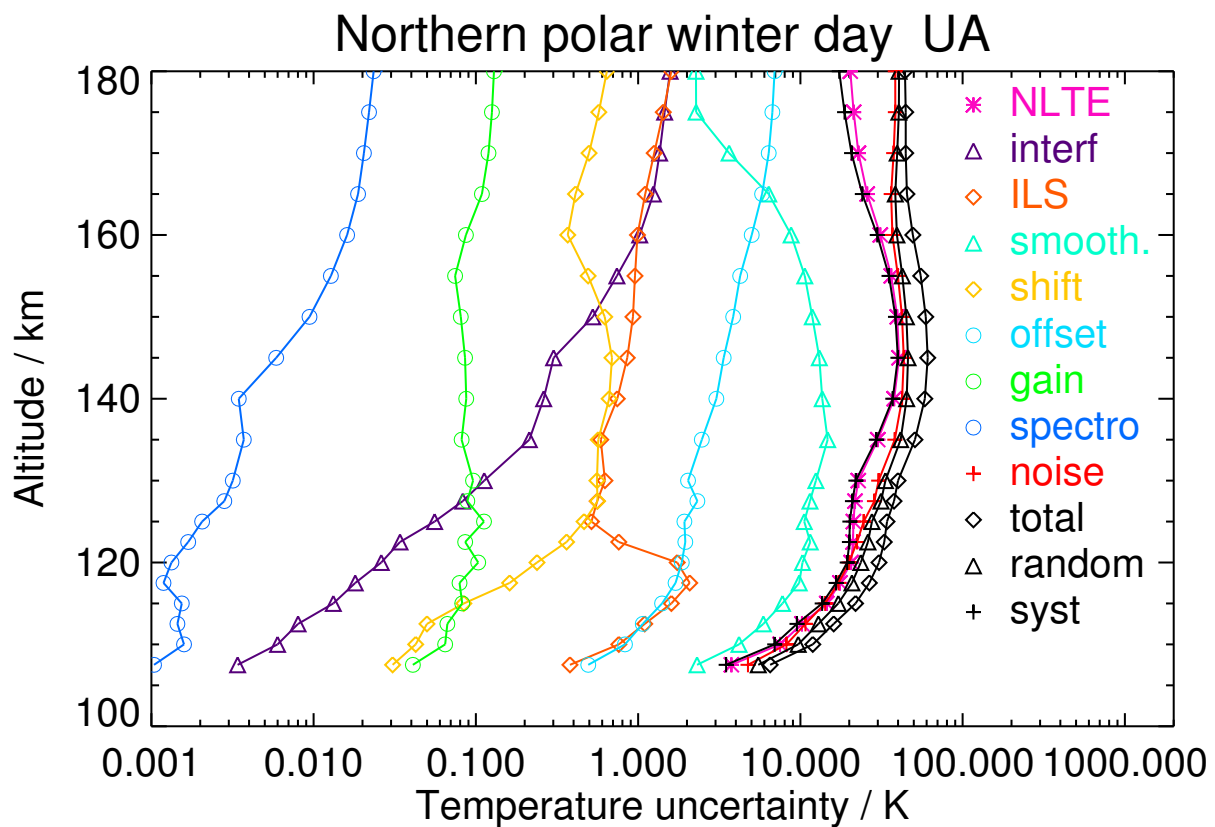

**Figure S205.** V8R\_TwNO\_662 Northern polar winter day, high solar activity

**Table S207.** Temperature error budget for Northern polar winter night, high solar activity. All uncertainties are  $1\sigma$ .

| altitude (km) | mean target (K) | NLTE (K) | interf (K) | ILS (K) | smooth. (K) | shift (K) | offset (K) | gain (K) | spectro (K) | noise (K) | random (K) | syst (K) | total (K) |
|---------------|-----------------|----------|------------|---------|-------------|-----------|------------|----------|-------------|-----------|------------|----------|-----------|
| 110           | 281.54          | 6.03     | <0.01      | 0.93    | 3.99        | 0.07      | 0.77       | 0.07     | <0.01       | 8.25      | 9.70       | 5.26     | 11.03     |
| 120           | 390.94          | 17.23    | <0.01      | 1.96    | 8.78        | 0.19      | 1.54       | 0.09     | <0.01       | 17.95     | 20.55      | 16.74    | 26.51     |
| 130           | 497.48          | 20.21    | 0.04       | 0.56    | 10.60       | 0.38      | 1.59       | 0.06     | <0.01       | 26.69     | 29.26      | 19.49    | 35.15     |
| 140           | 564.43          | 34.24    | 0.08       | 0.58    | 13.97       | 0.45      | 3.04       | 0.07     | <0.01       | 40.90     | 43.87      | 33.56    | 55.23     |
| 150           | 623.98          | 36.50    | 0.18       | 0.96    | 15.49       | 0.60      | 4.66       | 0.08     | <0.01       | 43.83     | 47.33      | 35.72    | 59.30     |
| 160           | 687.74          | 27.90    | 0.30       | 1.22    | 11.86       | 0.65      | 6.09       | 0.07     | 0.01        | 43.24     | 45.94      | 26.77    | 53.18     |
| 170           | 727.96          | 19.70    | 0.37       | 1.27    | 5.38        | 0.76      | 6.64       | 0.07     | 0.02        | 41.40     | 43.03      | 18.04    | 46.66     |
| 180           | 744.38          | 16.49    | 0.36       | 1.47    | 4.70        | 0.93      | 6.77       | 0.06     | 0.02        | 40.15     | 41.93      | 14.02    | 44.22     |

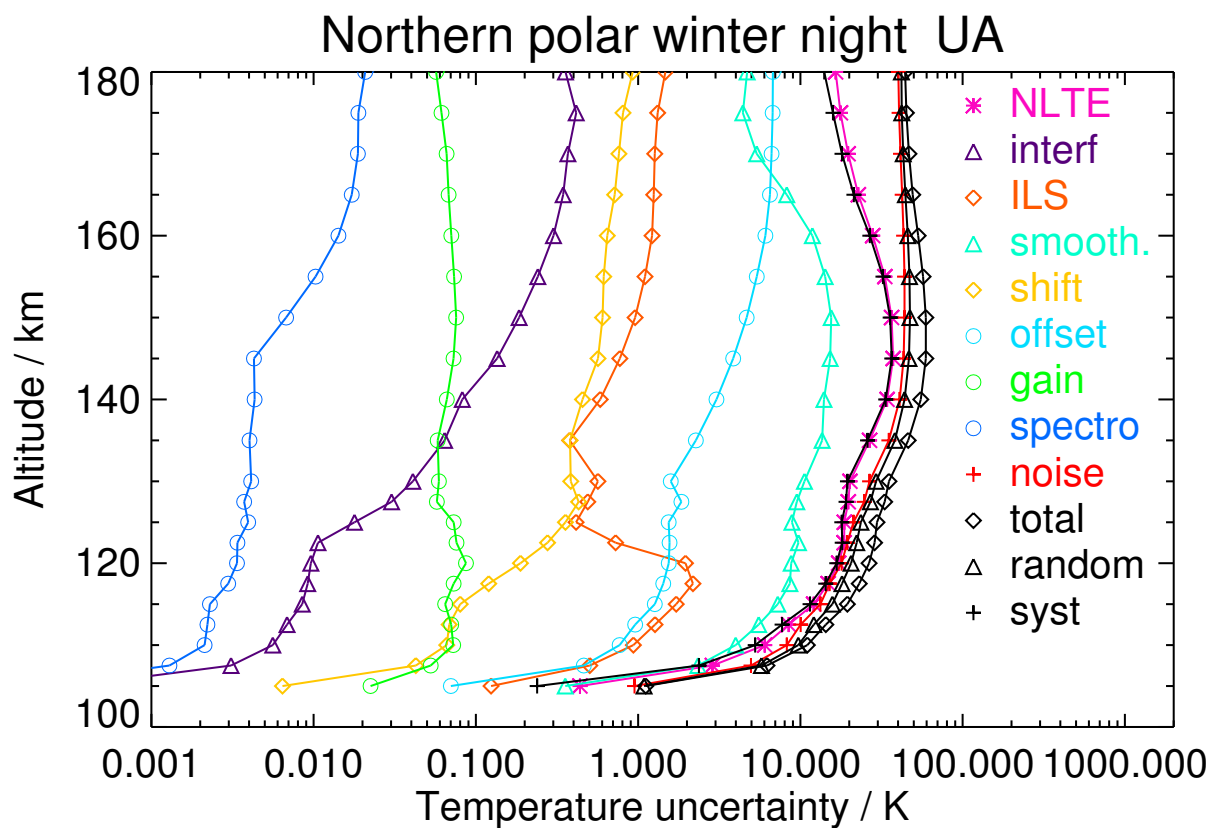

**Figure S206.** V8R\_TwNO\_662 Northern polar winter night, high solar activity

**Table S208.** Temperature error budget for Northern polar spring day, high solar activity. All uncertainties are  $1\sigma$ .

| altitude (km) | mean target (K) | NLTE (K) | interf (K) | ILS (K) | smooth. (K) | shift (K) | offset (K) | gain (K) | spectro (K) | noise (K) | random (K) | syst (K) | total (K) |
|---------------|-----------------|----------|------------|---------|-------------|-----------|------------|----------|-------------|-----------|------------|----------|-----------|
| 110           | 324.23          | 9.32     | 0.02       | 1.45    | 3.79        | 0.19      | 0.81       | 0.03     | <0.01       | 8.36      | 9.79       | 8.84     | 13.19     |
| 120           | 431.40          | 26.83    | 0.08       | 3.60    | 10.15       | 0.38      | 1.85       | 0.09     | <0.01       | 21.25     | 24.74      | 26.05    | 35.93     |
| 130           | 529.62          | 24.60    | 0.30       | 1.16    | 11.51       | 0.63      | 1.81       | 0.07     | <0.01       | 30.87     | 33.72      | 23.64    | 41.18     |
| 140           | 610.53          | 35.83    | 0.62       | 0.66    | 11.82       | 0.72      | 2.42       | 0.06     | <0.01       | 42.17     | 44.50      | 35.04    | 56.64     |
| 150           | 675.89          | 40.07    | 0.93       | 0.73    | 10.92       | 0.80      | 2.73       | 0.08     | <0.01       | 40.47     | 43.07      | 38.96    | 58.08     |
| 160           | 740.90          | 32.38    | 1.32       | 0.84    | 9.29        | 0.57      | 3.46       | 0.11     | <0.01       | 34.09     | 36.75      | 30.99    | 48.07     |
| 170           | 791.76          | 21.76    | 1.82       | 1.19    | 3.95        | 0.45      | 4.86       | 0.15     | 0.02        | 31.91     | 33.49      | 20.36    | 39.19     |
| 180           | 838.71          | 21.51    | 2.33       | 1.72    | 2.18        | 0.85      | 6.05       | 0.16     | 0.03        | 34.28     | 36.63      | 18.62    | 41.09     |

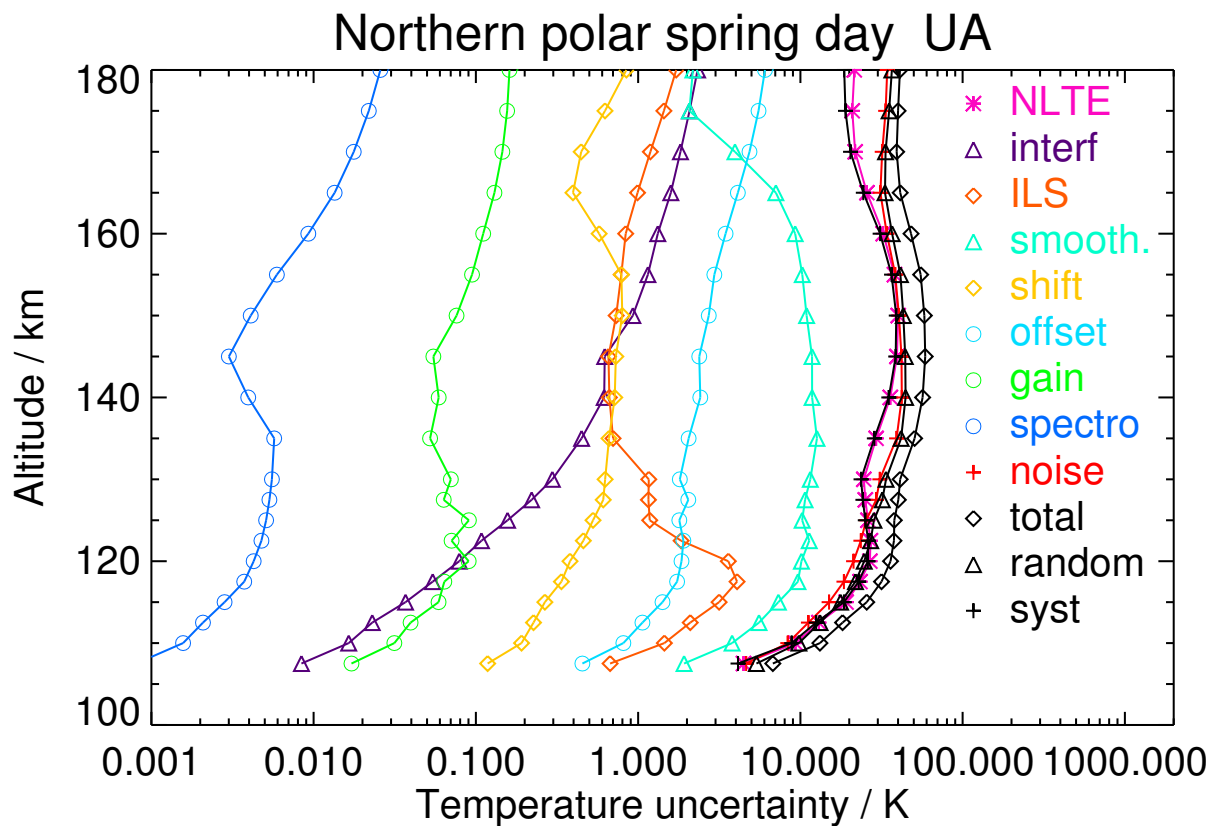

**Figure S207.** V8R\_TwNO\_662 Northern polar spring day, high solar activity

**Table S209.** Temperature error budget for Northern polar spring night, high solar activity. All uncertainties are  $1\sigma$ .

| altitude (km) | mean target (K) | NLTE (K) | interf (K) | ILS (K) | smooth. (K) | shift (K) | offset (K) | gain (K) | spectro (K) | noise (K) | random (K) | syst (K) | total (K) |
|---------------|-----------------|----------|------------|---------|-------------|-----------|------------|----------|-------------|-----------|------------|----------|-----------|
| 110           | 297.56          | 4.71     | 0.01       | 1.24    | 3.76        | 0.03      | 0.75       | 0.02     | <0.01       | 7.74      | 8.81       | 4.56     | 9.92      |
| 120           | 389.33          | 14.36    | 0.04       | 3.14    | 10.90       | 0.16      | 2.10       | 0.04     | 0.01        | 20.57     | 23.80      | 14.01    | 27.62     |
| 130           | 493.50          | 19.56    | 0.09       | 1.10    | 13.85       | 0.44      | 2.94       | 0.05     | 0.02        | 31.65     | 34.96      | 19.08    | 39.83     |
| 140           | 552.68          | 28.54    | 0.14       | 0.94    | 16.69       | 0.55      | 4.46       | 0.05     | 0.01        | 45.64     | 49.35      | 27.58    | 56.54     |
| 150           | 637.64          | 27.34    | 0.59       | 0.88    | 14.66       | 0.49      | 5.62       | 0.06     | 0.02        | 45.23     | 48.63      | 26.01    | 55.14     |
| 160           | 721.02          | 19.31    | 1.24       | 0.84    | 9.00        | 0.40      | 7.00       | 0.09     | 0.03        | 41.79     | 43.91      | 17.99    | 47.45     |
| 170           | 784.18          | 14.81    | 1.58       | 0.89    | 3.42        | 0.59      | 7.94       | 0.12     | 0.04        | 42.13     | 43.67      | 12.86    | 45.53     |
| 180           | 836.48          | 14.20    | 2.03       | 1.02    | 2.36        | 0.80      | 8.46       | 0.14     | 0.04        | 42.01     | 43.61      | 12.14    | 45.27     |

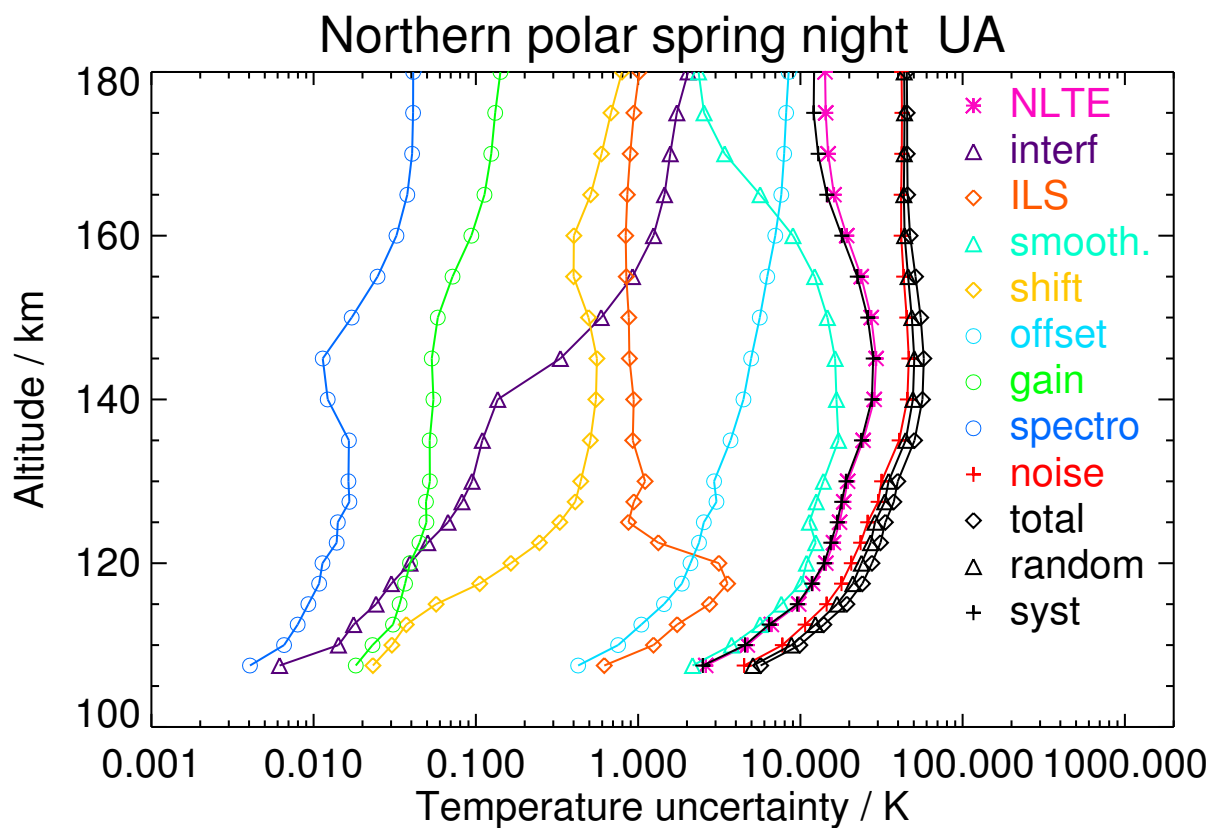

**Figure S208.** V8R\_TwNO\_662 Northern polar spring night, high solar activity

**Table S210.** Temperature error budget for Northern polar summer day, high solar activity. All uncertainties are  $1\sigma$ .

| altitude (km) | mean target (K) | NLTE (K) | interf (K) | ILS (K) | smooth. (K) | shift (K) | offset (K) | gain (K) | spectro (K) | noise (K) | random (K) | syst (K) | total (K) |
|---------------|-----------------|----------|------------|---------|-------------|-----------|------------|----------|-------------|-----------|------------|----------|-----------|
| 110           | 344.30          | 9.14     | 0.02       | 2.50    | 4.02        | 0.11      | 0.80       | 0.07     | <0.01       | 8.26      | 10.03      | 8.61     | 13.22     |
| 120           | 413.72          | 22.47    | 0.06       | 5.15    | 9.70        | 0.21      | 1.90       | 0.13     | <0.01       | 19.90     | 23.72      | 21.51    | 32.02     |
| 130           | 515.49          | 22.77    | 0.09       | 1.67    | 11.81       | 0.53      | 2.08       | 0.09     | 0.02        | 30.69     | 33.59      | 21.88    | 40.09     |
| 140           | 590.28          | 29.19    | 0.34       | 1.09    | 12.38       | 0.98      | 2.71       | 0.09     | <0.01       | 42.86     | 45.19      | 28.47    | 53.41     |
| 150           | 660.95          | 30.30    | 0.53       | 1.06    | 11.56       | 0.97      | 3.37       | 0.08     | 0.02        | 41.30     | 44.13      | 28.69    | 52.64     |
| 160           | 747.87          | 21.14    | 1.12       | 1.11    | 7.98        | 0.69      | 4.62       | 0.11     | 0.03        | 35.88     | 38.50      | 18.44    | 42.69     |
| 170           | 804.28          | 15.87    | 1.39       | 1.32    | 3.16        | 0.63      | 6.01       | 0.12     | 0.04        | 36.62     | 38.42      | 12.90    | 40.53     |
| 180           | 843.00          | 17.29    | 1.49       | 1.59    | 2.28        | 0.81      | 6.61       | 0.11     | 0.05        | 37.87     | 39.99      | 13.73    | 42.28     |

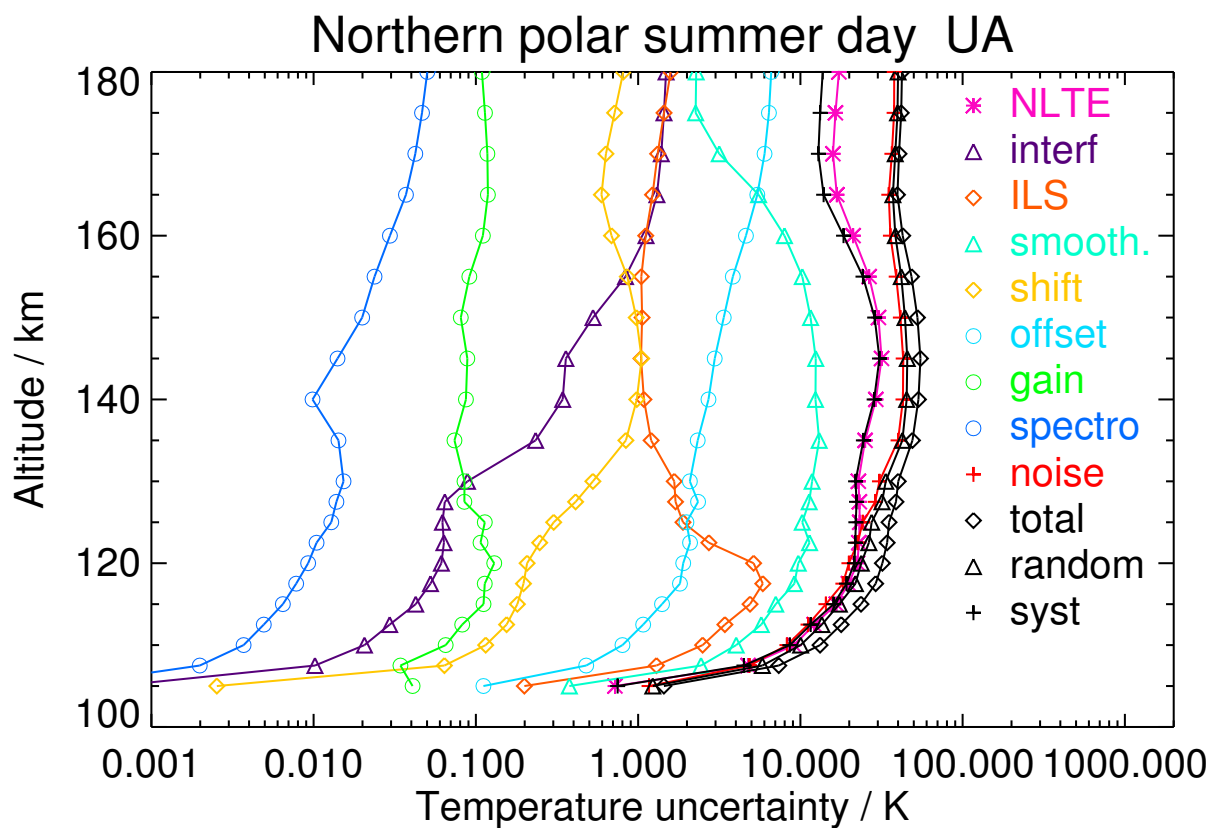

**Figure S209.** V8R\_TwNO\_662 Northern polar summer day, high solar activity

**Table S211.** Temperature error budget for Northern polar summer night, high solar activity. All uncertainties are  $1\sigma$ .

| altitude (km) | mean target (K) | NLTE (K) | interf (K) | ILS (K) | smooth. (K) | shift (K) | offset (K) | gain (K) | spectro (K) | noise (K) | random (K) | syst (K) | total (K) |
|---------------|-----------------|----------|------------|---------|-------------|-----------|------------|----------|-------------|-----------|------------|----------|-----------|
| 110           | 298.64          | 2.21     | 0.01       | 0.92    | 3.54        | 0.02      | 0.82       | 0.01     | <0.01       | 7.14      | 8.06       | 2.24     | 8.36      |
| 120           | 387.40          | 8.68     | 0.05       | 1.91    | 12.29       | 0.09      | 3.22       | 0.03     | 0.01        | 25.16     | 28.32      | 8.44     | 29.55     |
| 130           | 492.91          | 15.03    | 0.13       | 0.68    | 15.10       | 0.27      | 5.70       | 0.06     | 0.02        | 39.20     | 42.64      | 14.33    | 44.99     |
| 140           | 531.31          | 17.41    | 0.43       | 0.95    | 16.62       | 0.36      | 7.31       | 0.08     | 0.02        | 48.89     | 52.51      | 16.33    | 54.99     |
| 150           | 610.95          | 14.66    | 0.92       | 0.75    | 11.89       | 0.31      | 8.13       | 0.08     | 0.03        | 45.76     | 48.38      | 13.32    | 50.18     |
| 160           | 690.32          | 10.80    | 1.37       | 0.52    | 5.85        | 0.23      | 8.90       | 0.09     | 0.04        | 41.73     | 43.35      | 9.72     | 44.42     |
| 170           | 749.14          | 8.53     | 1.70       | 0.45    | 2.66        | 0.31      | 9.51       | 0.11     | 0.05        | 41.53     | 42.94      | 7.42     | 43.57     |
| 180           | 793.41          | 8.31     | 2.74       | 0.49    | 2.07        | 0.40      | 10.09      | 0.14     | 0.04        | 42.33     | 43.84      | 7.30     | 44.44     |

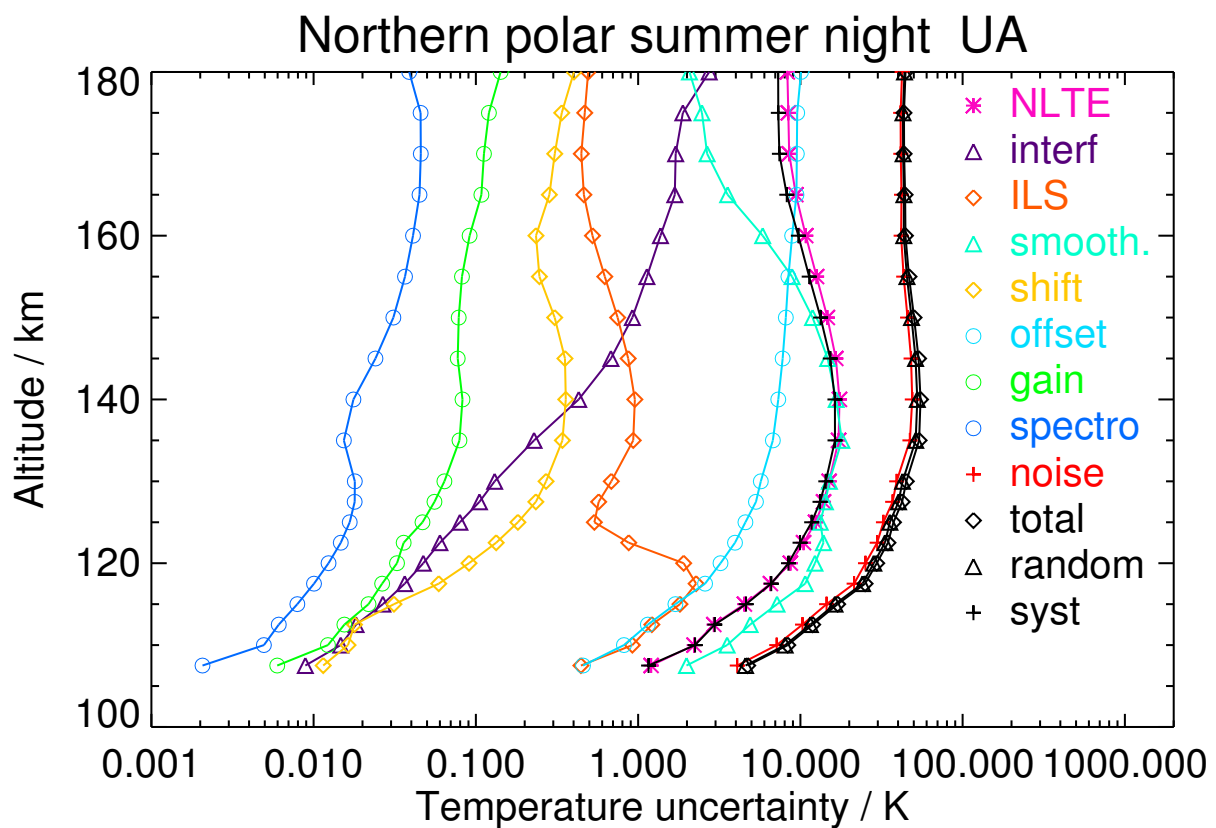

**Figure S210.** V8R\_TwNO\_662 Northern polar summer night, high solar activity

**Table S212.** Temperature error budget for Northern polar autumn day, high solar activity. All uncertainties are  $1\sigma$ .

| altitude (km) | mean target (K) | NLTE (K) | interf (K) | ILS (K) | smooth. (K) | shift (K) | offset (K) | gain (K) | spectro (K) | noise (K) | random (K) | syst (K) | total (K) |
|---------------|-----------------|----------|------------|---------|-------------|-----------|------------|----------|-------------|-----------|------------|----------|-----------|
| 110           | 280.83          | 9.53     | <0.01      | 0.84    | 3.72        | 0.12      | 0.73       | 0.08     | <0.01       | 7.91      | 9.36       | 8.99     | 12.98     |
| 120           | 429.86          | 26.45    | 0.05       | 1.99    | 9.17        | 0.39      | 1.66       | 0.14     | <0.01       | 20.41     | 23.34      | 25.74    | 34.75     |
| 130           | 546.93          | 24.69    | 0.17       | 0.59    | 9.74        | 0.65      | 1.41       | 0.10     | <0.01       | 29.62     | 31.91      | 23.80    | 39.81     |
| 140           | 623.77          | 41.64    | 0.41       | 0.51    | 10.60       | 0.69      | 2.20       | 0.07     | <0.01       | 41.68     | 43.53      | 41.16    | 59.91     |
| 150           | 690.88          | 43.16    | 0.75       | 0.91    | 10.63       | 0.94      | 2.95       | 0.09     | <0.01       | 41.29     | 43.73      | 42.18    | 60.76     |
| 160           | 778.63          | 31.48    | 1.55       | 1.08    | 7.76        | 0.55      | 4.05       | 0.14     | <0.01       | 35.15     | 37.71      | 29.75    | 48.03     |
| 170           | 846.88          | 24.63    | 2.46       | 1.33    | 3.07        | 0.75      | 5.86       | 0.19     | 0.01        | 34.61     | 36.76      | 22.49    | 43.09     |
| 180           | 902.81          | 28.58    | 3.09       | 1.59    | 1.72        | 1.29      | 7.02       | 0.21     | 0.02        | 36.66     | 39.19      | 26.29    | 47.19     |

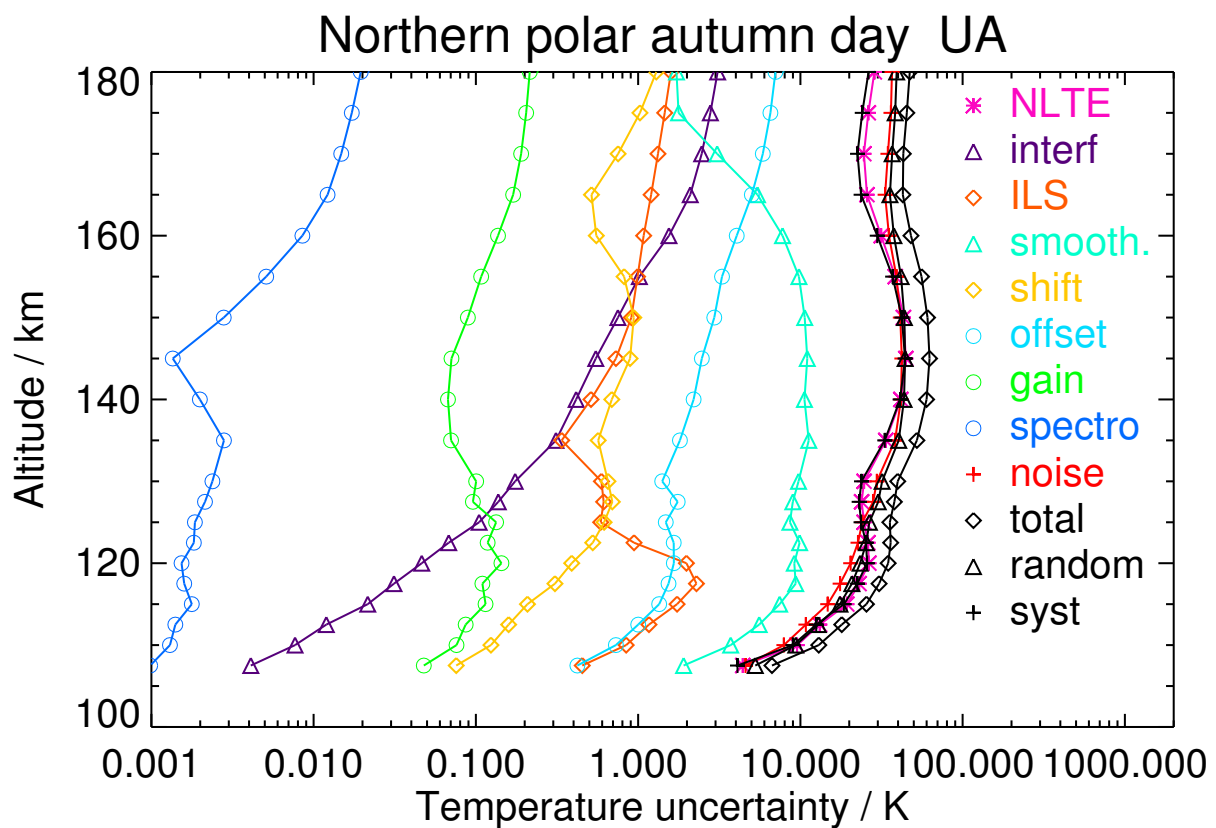

**Figure S211.** V8R\_TwNO\_662 Northern polar autumn day, high solar activity



**Table S213.** Temperature error budget for Northern polar autumn night, high solar activity. All uncertainties are  $1\sigma$ .

| altitude (km) | mean target (K) | NLTE (K) | interf (K) | ILS (K) | smooth. (K) | shift (K) | offset (K) | gain (K) | spectro (K) | noise (K) | random (K) | syst (K) | total (K) |
|---------------|-----------------|----------|------------|---------|-------------|-----------|------------|----------|-------------|-----------|------------|----------|-----------|
| 110           | 281.13          | 5.98     | 0.02       | 0.62    | 3.95        | 0.04      | 0.73       | 0.05     | <0.01       | 8.06      | 9.42       | 5.34     | 10.82     |
| 120           | 413.82          | 18.47    | 0.11       | 1.44    | 10.71       | 0.26      | 2.02       | 0.10     | <0.01       | 21.70     | 25.09      | 17.41    | 30.54     |
| 130           | 533.64          | 23.50    | 0.28       | 0.57    | 12.30       | 0.48      | 2.38       | 0.09     | <0.01       | 32.21     | 35.10      | 22.70    | 41.80     |
| 140           | 601.23          | 35.20    | 0.41       | 0.58    | 13.94       | 0.50      | 3.69       | 0.07     | <0.01       | 44.84     | 47.79      | 34.27    | 58.81     |
| 150           | 671.68          | 35.32    | 1.29       | 0.73    | 13.13       | 0.49      | 5.02       | 0.08     | <0.01       | 44.46     | 47.76      | 33.82    | 58.52     |
| 160           | 719.41          | 27.63    | 1.94       | 0.93    | 9.92        | 0.69      | 6.57       | 0.11     | 0.02        | 41.50     | 44.62      | 25.32    | 51.30     |
| 170           | 763.05          | 21.14    | 2.19       | 1.08    | 4.29        | 0.87      | 7.57       | 0.13     | 0.02        | 41.89     | 44.08      | 18.46    | 47.79     |
| 180           | 802.91          | 19.58    | 2.37       | 1.14    | 3.09        | 1.03      | 7.65       | 0.14     | 0.03        | 40.78     | 43.06      | 16.39    | 46.07     |

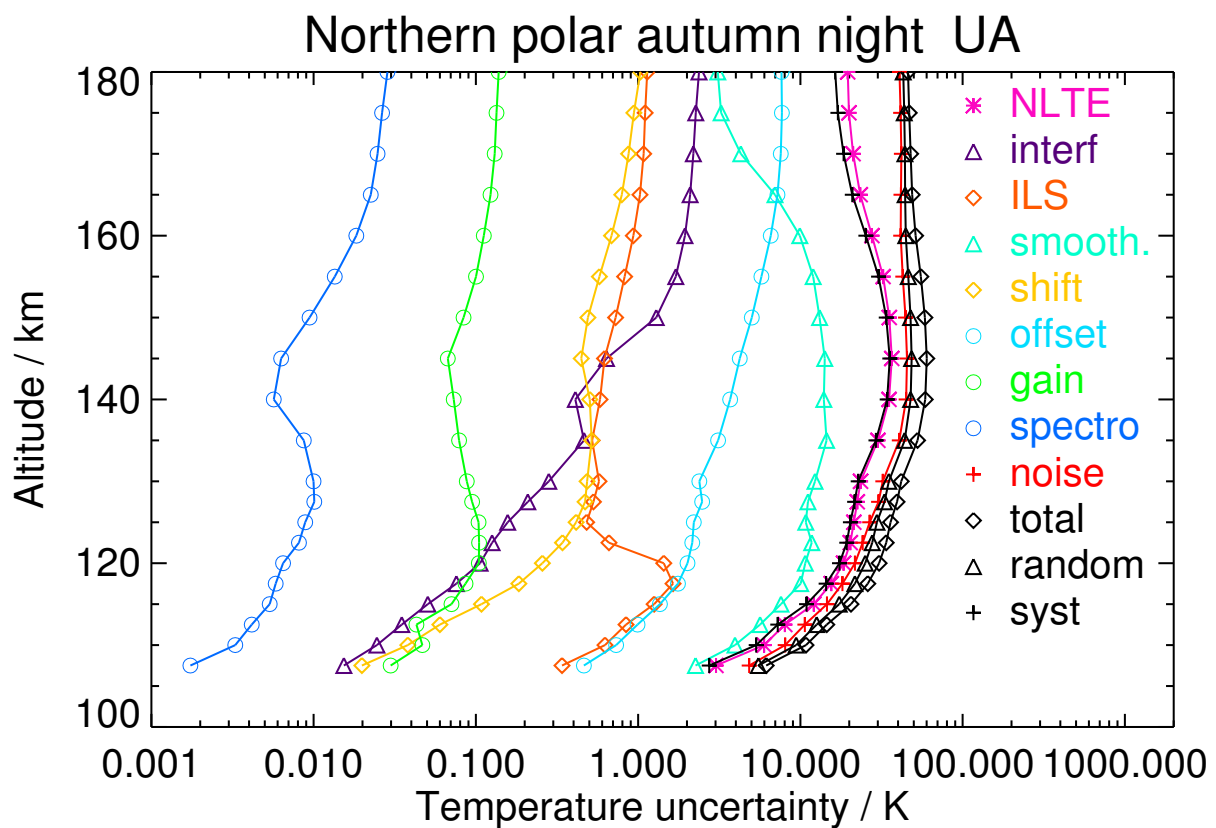

**Figure S212.** V8R\_TwNO\_662 Northern polar autumn night, high solar activity

**Table S214.** Temperature error budget for Northern midlatitude winter day, high solar activity. All uncertainties are  $1\sigma$ .

| altitude (km) | mean target (K) | NLTE (K) | interf (K) | ILS (K) | smooth. (K) | shift (K) | offset (K) | gain (K) | spectro (K) | noise (K) | random (K) | syst (K) | total (K) |
|---------------|-----------------|----------|------------|---------|-------------|-----------|------------|----------|-------------|-----------|------------|----------|-----------|
| 110           | 239.73          | 3.05     | <0.01      | 0.38    | 2.46        | 0.04      | 0.75       | 0.03     | <0.01       | 8.03      | 8.56       | 2.70     | 8.98      |
| 120           | 350.92          | 11.87    | 0.04       | 1.11    | 11.67       | 0.13      | 2.21       | 0.08     | <0.01       | 23.20     | 26.36      | 11.24    | 28.66     |
| 130           | 468.94          | 21.12    | 0.11       | 0.52    | 15.40       | 0.34      | 3.50       | 0.13     | <0.01       | 35.98     | 39.77      | 20.20    | 44.61     |
| 140           | 563.66          | 34.72    | 0.15       | 0.76    | 16.79       | 0.44      | 4.70       | 0.14     | <0.01       | 46.22     | 50.02      | 33.84    | 60.39     |
| 150           | 645.38          | 35.22    | 0.57       | 0.89    | 14.61       | 0.46      | 5.73       | 0.12     | <0.01       | 42.38     | 45.90      | 34.31    | 57.31     |
| 160           | 715.24          | 27.62    | 0.92       | 0.94    | 10.22       | 0.42      | 7.11       | 0.09     | 0.01        | 40.52     | 42.99      | 26.71    | 50.61     |
| 170           | 763.69          | 20.27    | 1.07       | 0.94    | 3.74        | 0.43      | 8.04       | 0.09     | 0.02        | 42.07     | 43.52      | 19.17    | 47.56     |
| 180           | 798.29          | 17.19    | 1.14       | 0.96    | 3.02        | 0.45      | 8.02       | 0.09     | 0.02        | 40.69     | 42.15      | 15.82    | 45.02     |

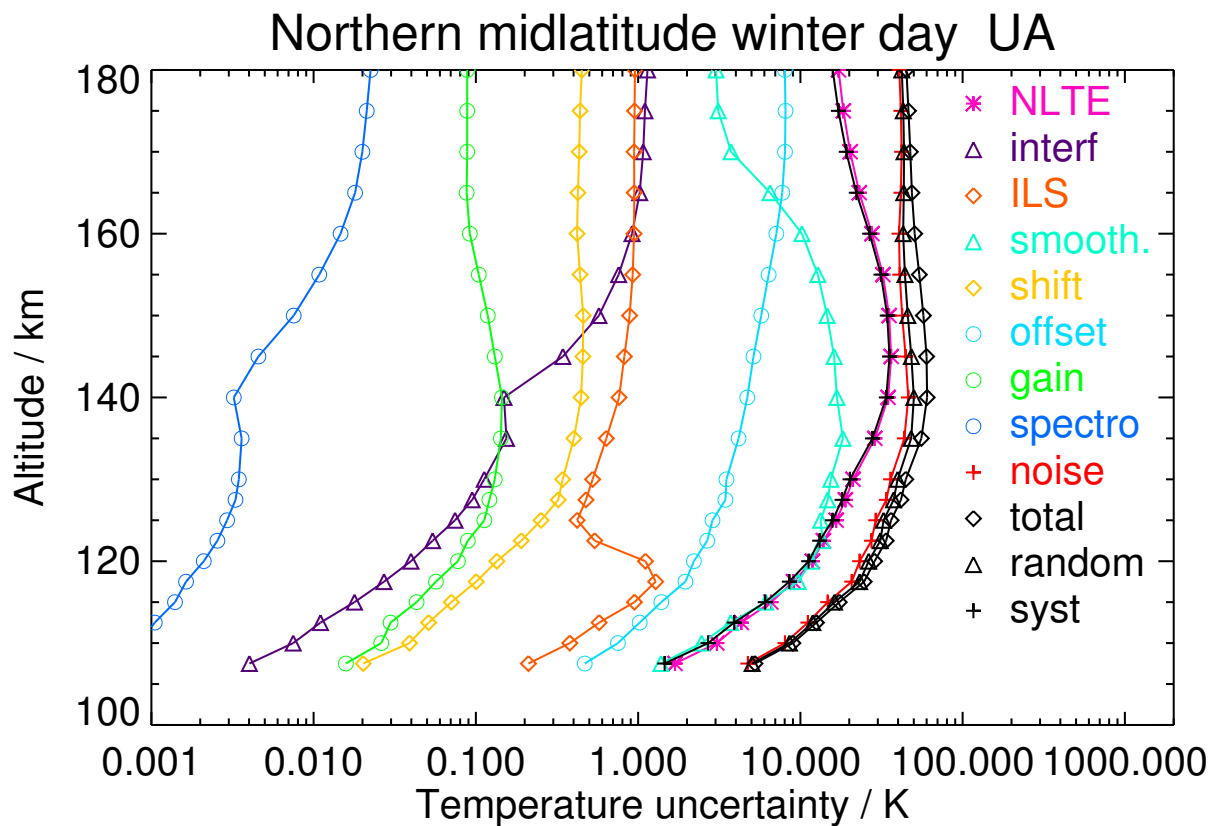

**Figure S213.** V8R\_TwNO\_662 Northern midlatitude winter day, high solar activity

**Table S215.** Temperature error budget for Northern midlatitude winter night, high solar activity. All uncertainties are  $1\sigma$ .

| altitude (km) | mean target (K) | NLTE (K) | interf (K) | ILS (K) | smooth. (K) | shift (K) | offset (K) | gain (K) | spectro (K) | noise (K) | random (K) | syst (K) | total (K) |
|---------------|-----------------|----------|------------|---------|-------------|-----------|------------|----------|-------------|-----------|------------|----------|-----------|
| 110           | 292.61          | 3.56     | 0.01       | 0.59    | 3.61        | 0.02      | 0.72       | 0.02     | <0.01       | 6.99      | 8.18       | 2.91     | 8.68      |
| 120           | 357.82          | 10.39    | 0.03       | 1.13    | 10.52       | 0.13      | 2.50       | 0.05     | 0.01        | 23.72     | 26.81      | 8.36     | 28.08     |
| 130           | 471.36          | 14.93    | 0.06       | 0.45    | 14.12       | 0.28      | 4.30       | 0.06     | 0.02        | 35.92     | 39.32      | 13.61    | 41.61     |
| 140           | 552.38          | 23.54    | 0.14       | 0.61    | 15.91       | 0.36      | 6.58       | 0.08     | 0.01        | 48.29     | 52.24      | 21.29    | 56.42     |
| 150           | 638.96          | 22.00    | 0.43       | 0.69    | 12.15       | 0.34      | 7.69       | 0.07     | 0.01        | 46.30     | 49.43      | 19.79    | 53.24     |
| 160           | 703.01          | 16.66    | 0.77       | 0.64    | 7.32        | 0.40      | 8.19       | 0.08     | 0.02        | 41.92     | 43.84      | 15.31    | 46.44     |
| 170           | 753.42          | 16.38    | 1.19       | 0.63    | 3.56        | 0.94      | 8.43       | 0.10     | 0.03        | 40.88     | 43.19      | 12.66    | 45.01     |
| 180           | 791.60          | 20.06    | 1.61       | 0.71    | 2.94        | 1.48      | 8.71       | 0.13     | 0.03        | 40.48     | 44.50      | 12.29    | 46.16     |

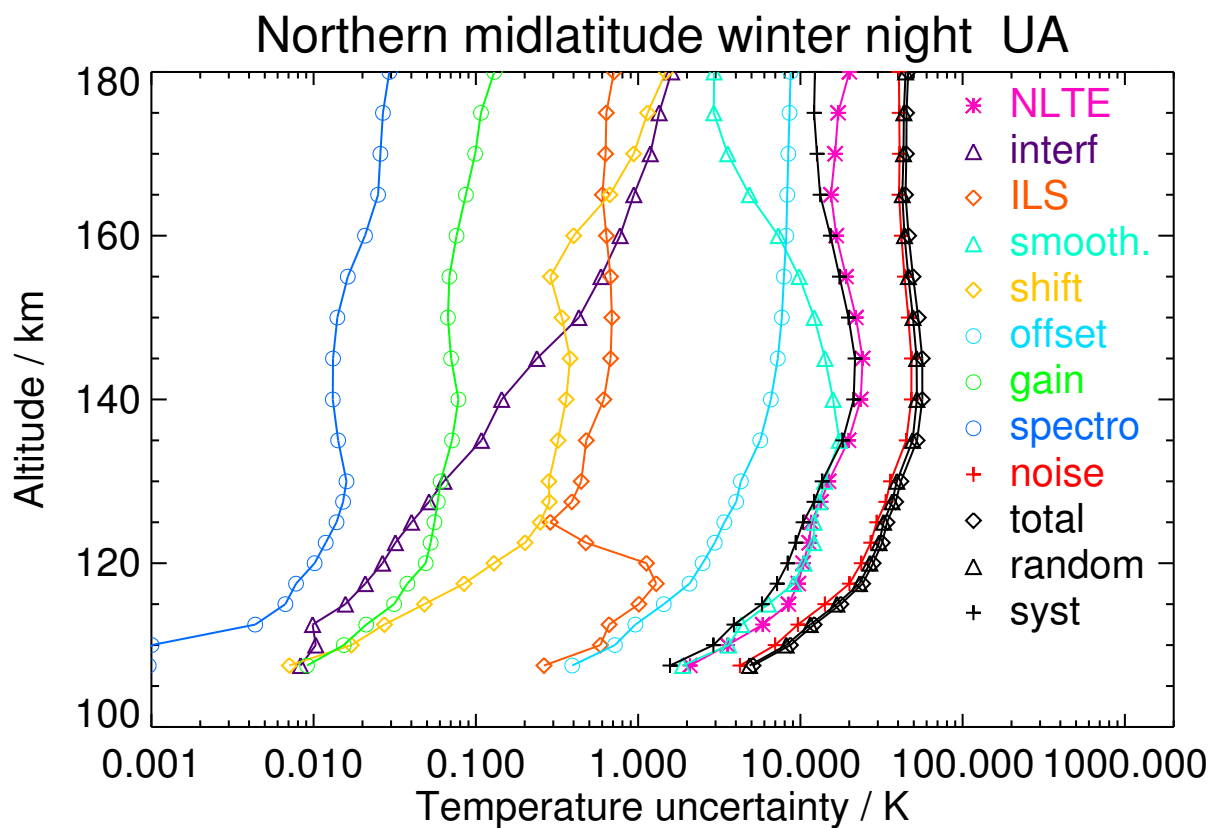

**Figure S214.** V8R\_TwNO\_662 Northern midlatitude winter night, high solar activity

**Table S216.** Temperature error budget for Northern midlatitude spring day, high solar activity. All uncertainties are  $1\sigma$ .

| altitude (km) | mean target (K) | NLTE (K) | interf (K) | ILS (K) | smooth. (K) | shift (K) | offset (K) | gain (K) | spectro (K) | noise (K) | random (K) | syst (K) | total (K) |
|---------------|-----------------|----------|------------|---------|-------------|-----------|------------|----------|-------------|-----------|------------|----------|-----------|
| 110           | 291.11          | 7.89     | <0.01      | 0.88    | 3.25        | 0.23      | 0.92       | 0.02     | <0.01       | 9.24      | 10.48      | 7.07     | 12.64     |
| 120           | 382.34          | 24.91    | 0.02       | 2.48    | 11.24       | 0.35      | 1.88       | 0.04     | <0.01       | 20.78     | 24.83      | 23.91    | 34.48     |
| 130           | 491.21          | 26.59    | 0.04       | 0.78    | 12.54       | 0.42      | 2.44       | 0.06     | <0.01       | 32.39     | 35.32      | 25.93    | 43.82     |
| 140           | 591.31          | 36.97    | 0.18       | 0.55    | 12.37       | 0.49      | 2.23       | 0.05     | <0.01       | 40.52     | 42.79      | 36.55    | 56.28     |
| 150           | 674.16          | 42.69    | 0.28       | 0.72    | 11.17       | 0.64      | 2.55       | 0.05     | <0.01       | 39.06     | 41.29      | 42.14    | 59.00     |
| 160           | 749.05          | 35.30    | 0.48       | 1.03    | 9.22        | 0.59      | 3.70       | 0.08     | 0.01        | 34.48     | 36.73      | 34.45    | 50.36     |
| 170           | 797.74          | 24.66    | 0.77       | 1.46    | 3.37        | 0.60      | 5.30       | 0.10     | 0.02        | 35.76     | 37.44      | 22.98    | 43.93     |
| 180           | 843.36          | 22.61    | 1.09       | 1.91    | 2.38        | 0.72      | 6.20       | 0.11     | 0.03        | 36.95     | 39.84      | 18.40    | 43.88     |

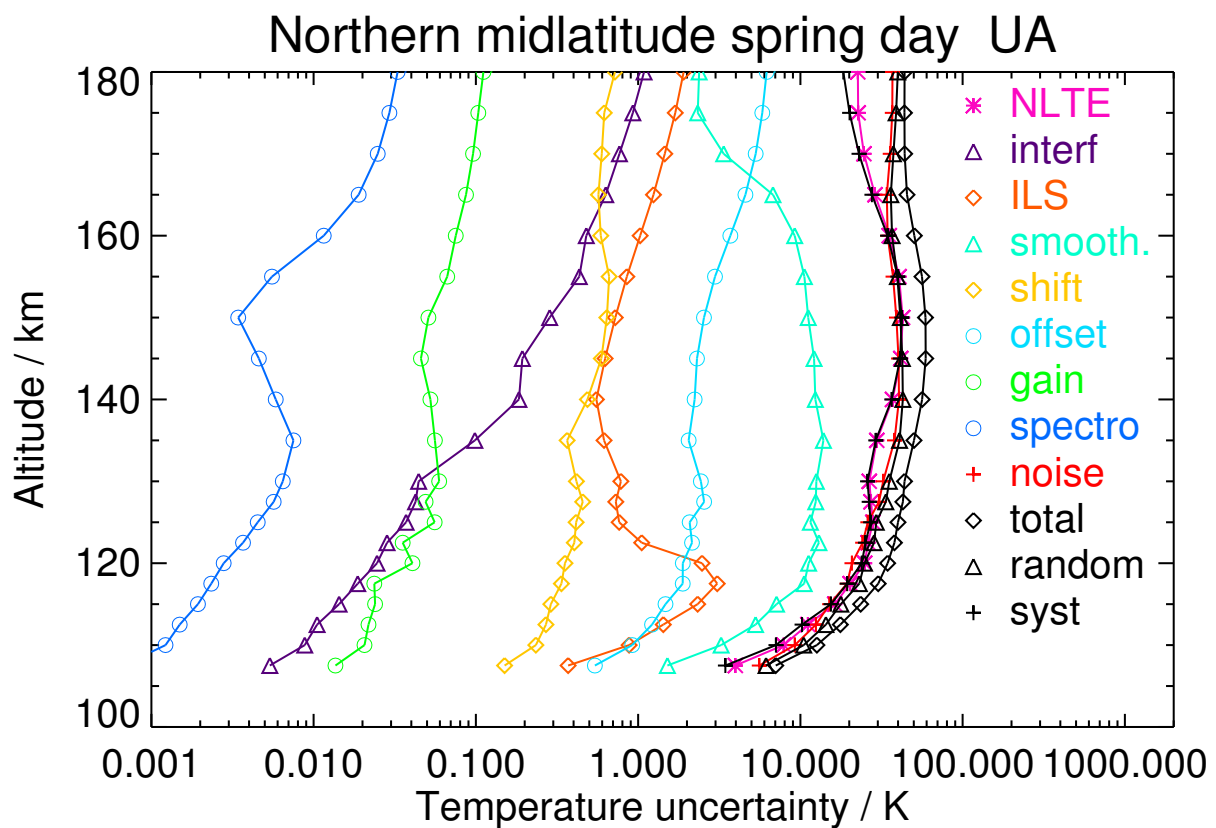

**Figure S215.** V8R\_TwNO\_662 Northern midlatitude spring day, high solar activity

**Table S217.** Temperature error budget for Northern midlatitude spring night, high solar activity. All uncertainties are  $1\sigma$ .

| altitude (km) | mean target (K) | NLTE (K) | interf (K) | ILS (K) | smooth. (K) | shift (K) | offset (K) | gain (K) | spectro (K) | noise (K) | random (K) | syst (K) | total (K) |
|---------------|-----------------|----------|------------|---------|-------------|-----------|------------|----------|-------------|-----------|------------|----------|-----------|
| 110           | 300.18          | 4.74     | 0.02       | 1.09    | 3.97        | 0.02      | 0.77       | 0.02     | <0.01       | 7.36      | 8.62       | 4.47     | 9.71      |
| 120           | 374.34          | 12.43    | 0.05       | 2.45    | 11.97       | 0.16      | 2.41       | 0.04     | 0.02        | 22.40     | 25.98      | 11.68    | 28.49     |
| 130           | 496.75          | 18.45    | 0.11       | 0.93    | 14.92       | 0.42      | 3.82       | 0.06     | 0.03        | 34.90     | 38.44      | 17.87    | 42.39     |
| 140           | 553.04          | 27.14    | 0.27       | 0.92    | 17.00       | 0.47      | 5.37       | 0.08     | 0.02        | 46.82     | 50.89      | 25.64    | 56.99     |
| 150           | 639.51          | 26.34    | 0.69       | 0.85    | 13.84       | 0.37      | 6.74       | 0.09     | 0.02        | 46.59     | 49.86      | 24.83    | 55.70     |
| 160           | 712.49          | 19.84    | 1.07       | 0.70    | 8.40        | 0.37      | 7.73       | 0.09     | 0.03        | 43.18     | 45.23      | 18.58    | 48.89     |
| 170           | 755.31          | 16.16    | 1.35       | 0.58    | 3.59        | 0.59      | 8.17       | 0.10     | 0.04        | 41.55     | 43.21      | 14.23    | 45.49     |
| 180           | 795.56          | 16.26    | 1.99       | 0.60    | 2.89        | 0.87      | 8.56       | 0.11     | 0.04        | 41.83     | 43.77      | 13.61    | 45.84     |

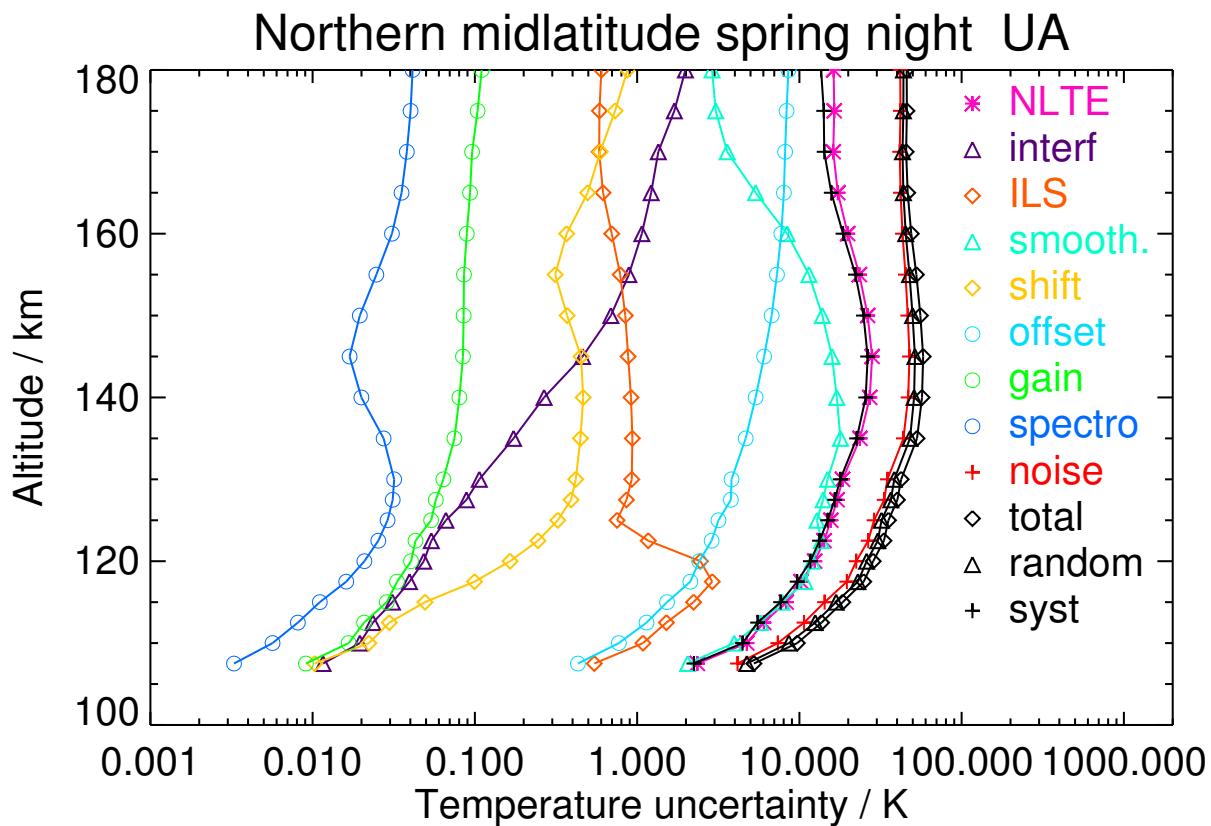

**Figure S216.** V8R\_TwNO\_662 Northern midlatitude spring night, high solar activity

**Table S218.** Temperature error budget for Northern midlatitude summer day, high solar activity. All uncertainties are  $1\sigma$ .

| altitude (km) | mean target (K) | NLTE (K) | interf (K) | ILS (K) | smooth. (K) | shift (K) | offset (K) | gain (K) | spectro (K) | noise (K) | random (K) | syst (K) | total (K) |
|---------------|-----------------|----------|------------|---------|-------------|-----------|------------|----------|-------------|-----------|------------|----------|-----------|
| 110           | 292.87          | 4.89     | 0.01       | 0.75    | 3.18        | 0.09      | 0.80       | 0.01     | <0.01       | 8.45      | 9.21       | 4.66     | 10.32     |
| 120           | 355.57          | 17.81    | 0.04       | 1.83    | 11.85       | 0.18      | 2.36       | 0.05     | <0.01       | 23.11     | 26.45      | 17.36    | 31.63     |
| 130           | 467.35          | 25.60    | 0.10       | 0.63    | 14.22       | 0.38      | 3.28       | 0.07     | 0.01        | 34.88     | 38.22      | 24.99    | 45.67     |
| 140           | 580.88          | 34.51    | 0.31       | 1.03    | 13.86       | 0.78      | 3.28       | 0.07     | <0.01       | 42.97     | 45.72      | 33.93    | 56.94     |
| 150           | 679.83          | 30.97    | 0.32       | 1.19    | 11.61       | 0.74      | 4.00       | 0.04     | 0.01        | 41.36     | 43.53      | 30.47    | 53.13     |
| 160           | 763.34          | 20.14    | 0.97       | 1.12    | 7.58        | 0.43      | 5.49       | 0.08     | 0.02        | 36.97     | 38.57      | 19.34    | 43.15     |
| 170           | 824.01          | 14.75    | 1.39       | 1.06    | 2.70        | 0.39      | 6.95       | 0.12     | 0.03        | 39.68     | 40.88      | 13.40    | 43.02     |
| 180           | 859.24          | 14.76    | 1.52       | 1.06    | 2.19        | 0.52      | 7.32       | 0.12     | 0.03        | 39.66     | 41.04      | 12.99    | 43.04     |

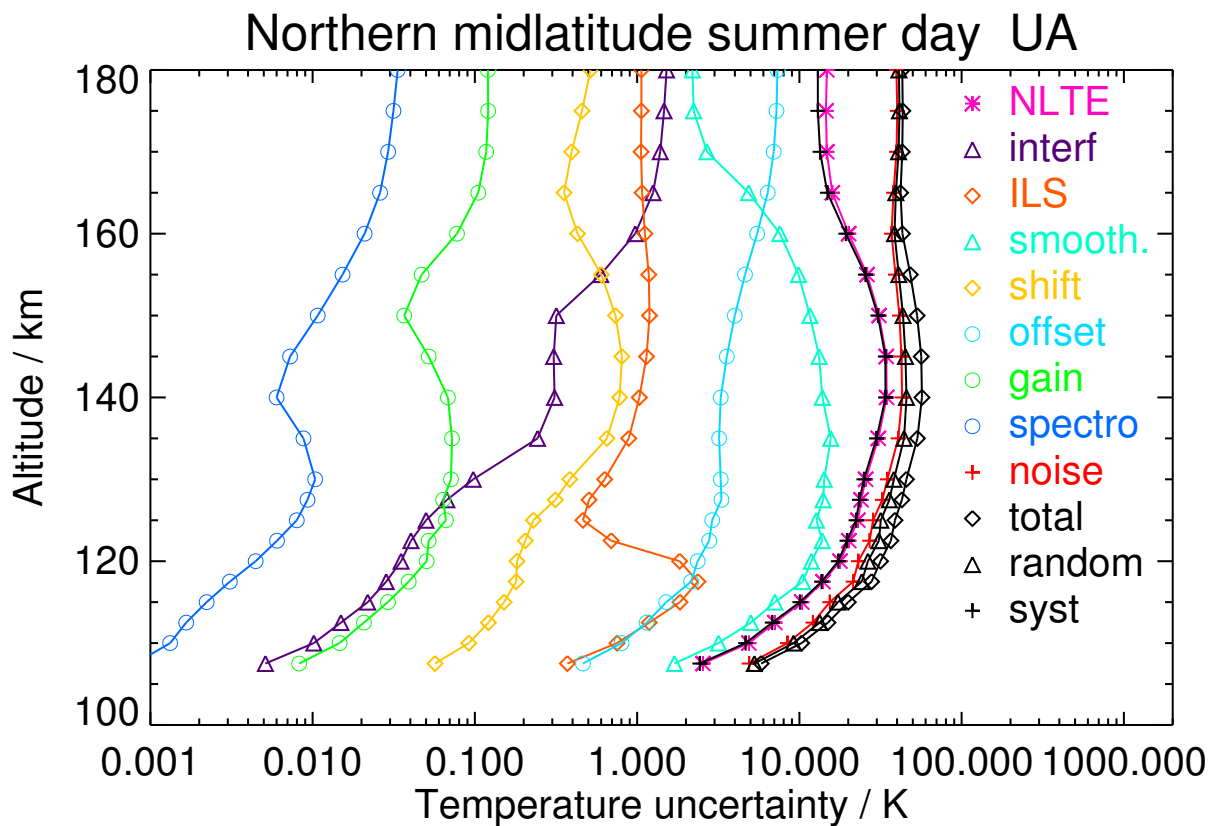

**Figure S217.** V8R\_TwNO\_662 Northern midlatitude summer day, high solar activity

**Table S219.** Temperature error budget for Northern midlatitude summer night, high solar activity. All uncertainties are  $1\sigma$ .

| altitude (km) | mean target (K) | NLTE (K) | interf (K) | ILS (K) | smooth. (K) | shift (K) | offset (K) | gain (K) | spectro (K) | noise (K) | random (K) | syst (K) | total (K) |
|---------------|-----------------|----------|------------|---------|-------------|-----------|------------|----------|-------------|-----------|------------|----------|-----------|
| 110           | 296.76          | 1.82     | 0.01       | 1.02    | 3.60        | 0.01      | 0.90       | <0.01    | <0.01       | 7.37      | 8.27       | 2.00     | 8.51      |
| 120           | 368.94          | 7.18     | 0.03       | 1.93    | 12.10       | 0.06      | 3.59       | 0.02     | 0.02        | 25.26     | 28.32      | 7.15     | 29.21     |
| 130           | 453.10          | 11.82    | 0.04       | 0.59    | 15.95       | 0.20      | 6.26       | 0.03     | 0.02        | 40.06     | 43.66      | 11.48    | 45.14     |
| 140           | 494.83          | 12.48    | 0.09       | 0.89    | 17.71       | 0.28      | 7.31       | 0.05     | 0.02        | 50.08     | 53.72      | 12.08    | 55.07     |
| 150           | 581.75          | 10.21    | 0.16       | 0.74    | 11.36       | 0.25      | 7.41       | 0.05     | 0.02        | 43.58     | 45.75      | 9.73     | 46.78     |
| 160           | 657.24          | 8.62     | 0.24       | 0.59    | 5.73        | 0.23      | 7.82       | 0.06     | 0.04        | 38.70     | 40.00      | 8.13     | 40.82     |
| 170           | 715.69          | 7.34     | 0.47       | 0.47    | 2.85        | 0.24      | 8.85       | 0.06     | 0.05        | 38.94     | 40.12      | 6.86     | 40.71     |

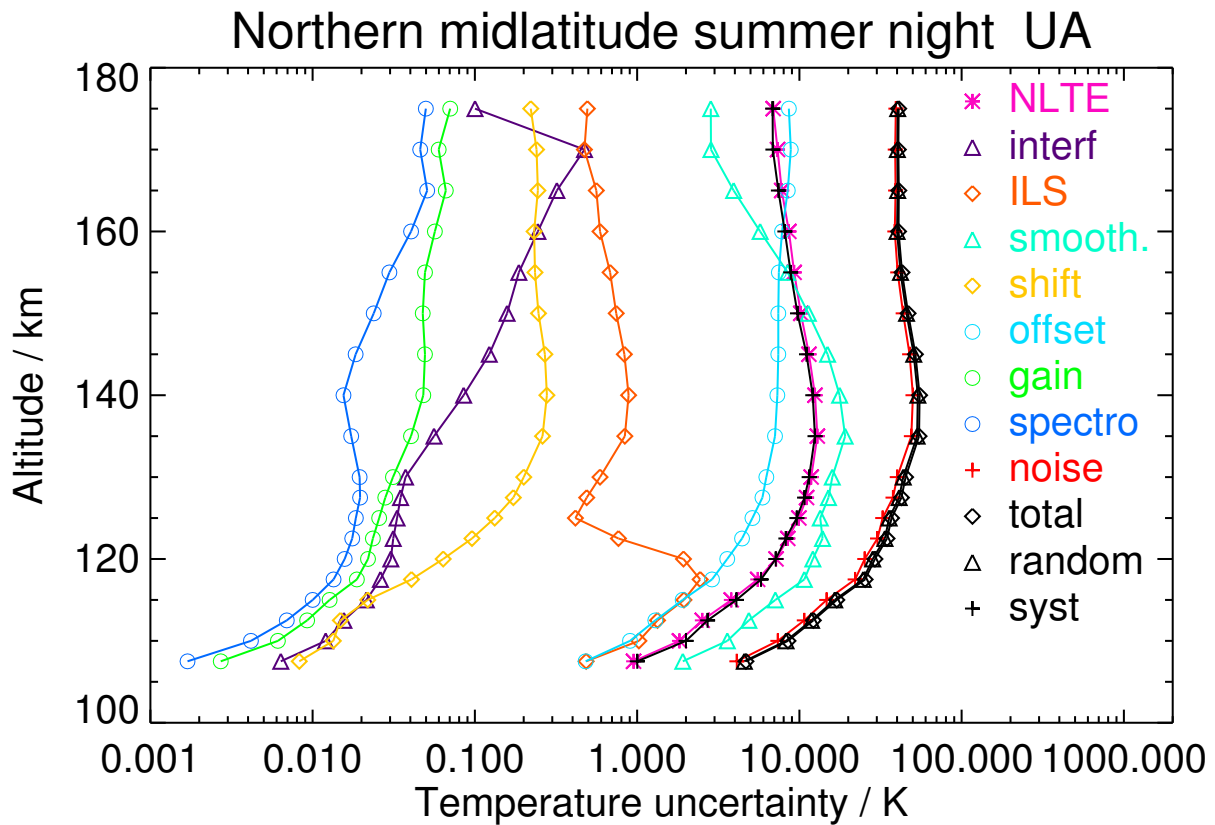

**Figure S218.** V8R\_TwNO\_662 Northern midlatitude summer night, high solar activity

**Table S220.** Temperature error budget for Northern midlatitude autumn day, high solar activity. All uncertainties are  $1\sigma$ .

| altitude (km) | mean target (K) | NLTE (K) | interf (K) | ILS (K) | smooth. (K) | shift (K) | offset (K) | gain (K) | spectro (K) | noise (K) | random (K) | syst (K) | total (K) |
|---------------|-----------------|----------|------------|---------|-------------|-----------|------------|----------|-------------|-----------|------------|----------|-----------|
| 110           | 270.14          | 4.28     | <0.01      | 0.53    | 2.34        | 0.13      | 0.95       | 0.02     | <0.01       | 9.43      | 10.00      | 3.75     | 10.68     |
| 120           | 377.32          | 14.65    | 0.02       | 1.50    | 10.98       | 0.26      | 2.23       | 0.05     | <0.01       | 23.81     | 26.73      | 13.96    | 30.15     |
| 130           | 468.89          | 22.65    | 0.07       | 0.59    | 15.99       | 0.38      | 3.28       | 0.11     | <0.01       | 36.31     | 40.28      | 21.82    | 45.81     |
| 140           | 525.45          | 35.07    | 0.14       | 0.81    | 17.67       | 0.51      | 3.68       | 0.15     | <0.01       | 44.16     | 48.42      | 34.09    | 59.22     |
| 150           | 642.63          | 40.32    | 0.16       | 0.98    | 15.08       | 0.59      | 4.61       | 0.12     | <0.01       | 41.88     | 45.46      | 39.54    | 60.25     |
| 160           | 751.12          | 33.01    | 0.60       | 1.03    | 9.73        | 0.39      | 6.13       | 0.10     | 0.01        | 38.78     | 41.23      | 32.04    | 52.22     |
| 170           | 822.55          | 25.32    | 0.95       | 1.03    | 3.45        | 0.35      | 7.53       | 0.11     | 0.02        | 41.17     | 42.96      | 23.70    | 49.06     |
| 180           | 870.39          | 21.82    | 1.06       | 1.06    | 2.35        | 0.42      | 7.90       | 0.12     | 0.02        | 40.72     | 42.58      | 19.79    | 46.96     |

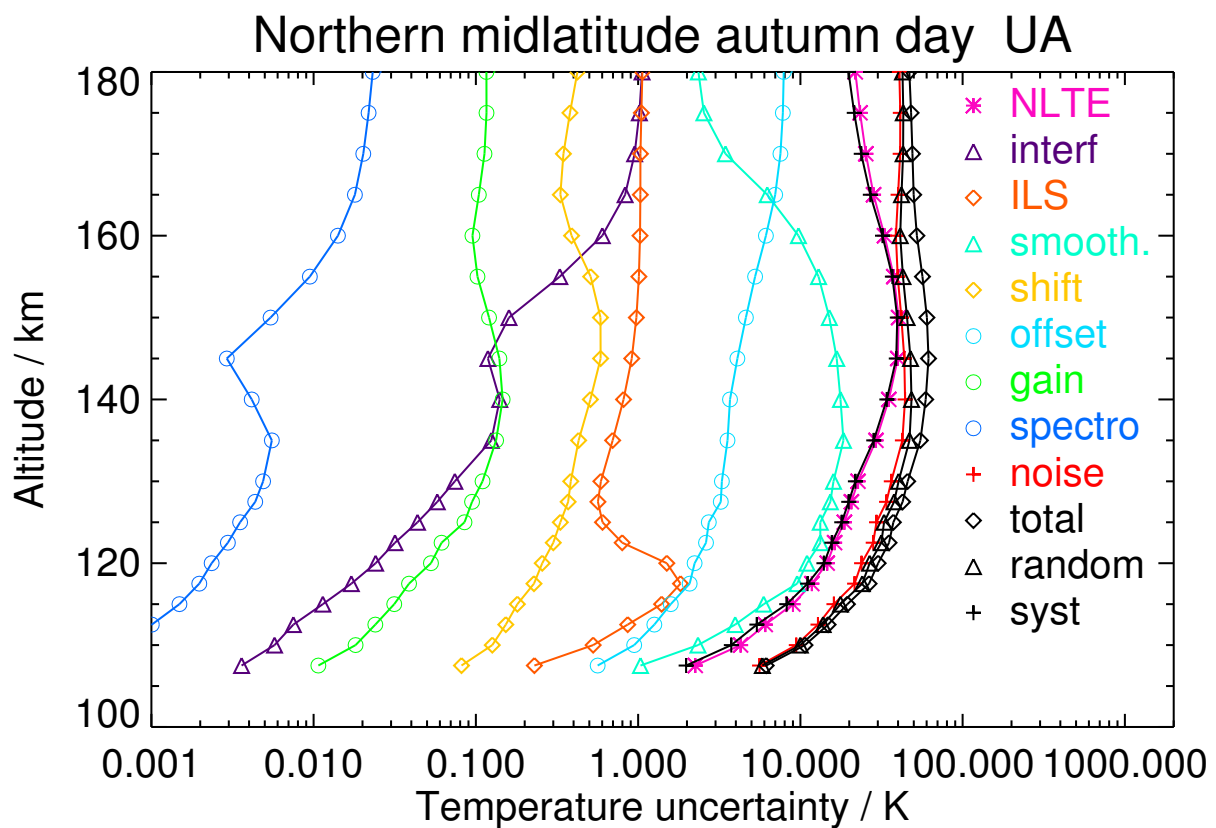

**Figure S219.** V8R\_TwNO\_662 Northern midlatitude autumn day, high solar activity



**Table S221.** Temperature error budget for Northern midlatitude autumn night, high solar activity. All uncertainties are  $1\sigma$ .

| altitude (km) | mean target (K) | NLTE (K) | interf (K) | ILS (K) | smooth. (K) | shift (K) | offset (K) | gain (K) | spectro (K) | noise (K) | random (K) | syst (K) | total (K) |
|---------------|-----------------|----------|------------|---------|-------------|-----------|------------|----------|-------------|-----------|------------|----------|-----------|
| 110           | 282.96          | 2.68     | 0.03       | 0.50    | 3.43        | 0.02      | 0.88       | 0.03     | <0.01       | 7.70      | 8.60       | 2.29     | 8.90      |
| 120           | 352.16          | 8.48     | 0.04       | 1.05    | 11.14       | 0.09      | 2.91       | 0.06     | <0.01       | 25.42     | 28.14      | 7.73     | 29.18     |
| 130           | 452.52          | 14.28    | 0.11       | 0.31    | 15.56       | 0.19      | 4.96       | 0.08     | 0.01        | 38.68     | 42.30      | 13.31    | 44.35     |
| 140           | 556.80          | 21.65    | 0.56       | 0.40    | 16.36       | 0.24      | 7.61       | 0.08     | <0.01       | 49.46     | 53.17      | 20.35    | 56.93     |
| 150           | 663.58          | 22.42    | 1.04       | 0.51    | 11.42       | 0.27      | 9.29       | 0.08     | 0.01        | 47.37     | 50.32      | 20.81    | 54.45     |
| 160           | 723.25          | 17.84    | 1.22       | 0.52    | 6.20        | 0.30      | 9.68       | 0.08     | 0.02        | 43.10     | 45.21      | 16.32    | 48.06     |
| 170           | 769.38          | 14.27    | 1.40       | 0.64    | 2.74        | 0.34      | 9.85       | 0.09     | 0.02        | 41.94     | 43.53      | 13.20    | 45.49     |
| 180           | 817.07          | 12.94    | 1.77       | 0.89    | 2.32        | 0.40      | 9.66       | 0.11     | 0.03        | 41.61     | 43.11      | 11.94    | 44.74     |

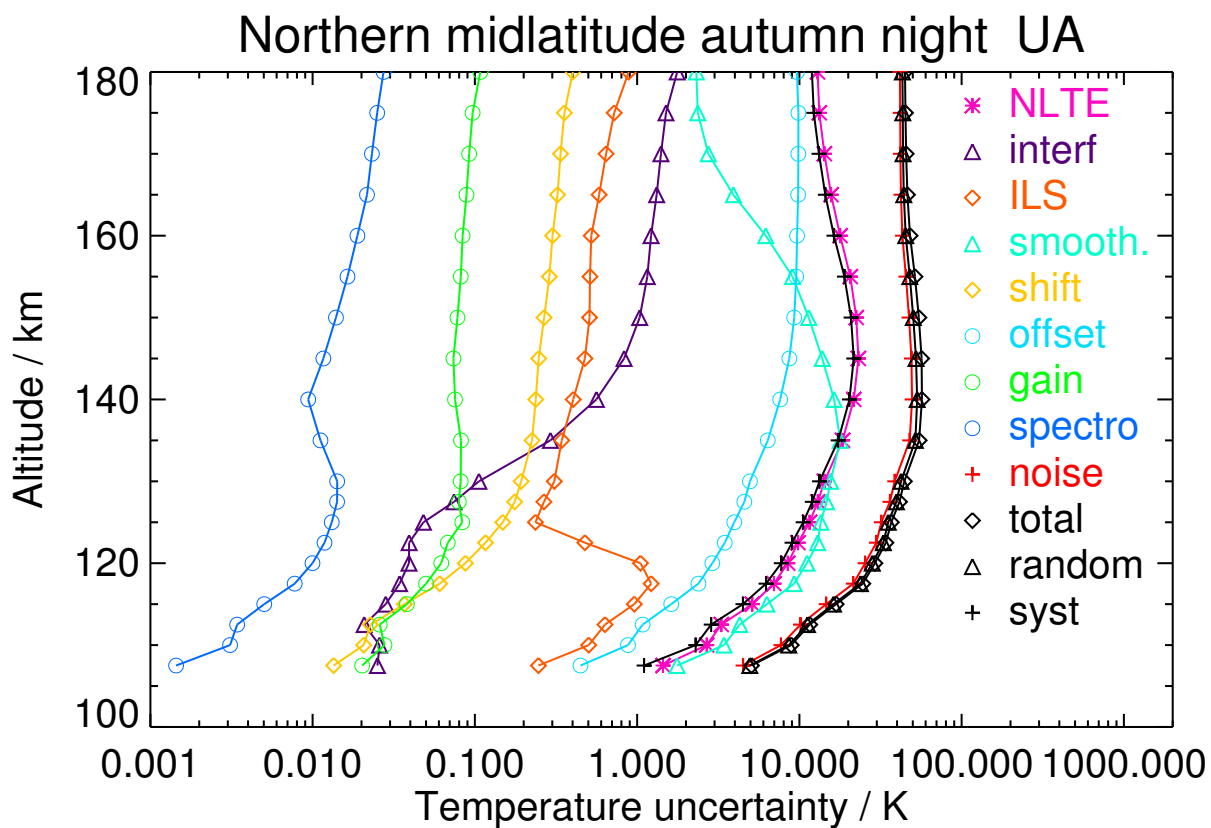

**Figure S220.** V8R\_TwNO\_662 Northern midlatitude autumn night, high solar activity

**Table S222.** Temperature error budget for Tropics day, high solar activity. All uncertainties are  $1\sigma$ .

| altitude<br>(km) | mean target<br>(K) | NLTE<br>(K) | interf<br>(K) | ILS<br>(K) | smooth.<br>(K) | shift<br>(K) | offset<br>(K) | gain<br>(K) | spectro<br>(K) | noise<br>(K) | random<br>(K) | syst<br>(K) | total<br>(K) |
|------------------|--------------------|-------------|---------------|------------|----------------|--------------|---------------|-------------|----------------|--------------|---------------|-------------|--------------|
| 110              | 250.97             | 4.69        | <0.01         | 0.24       | 1.60           | 0.16         | 0.96          | 0.03        | <0.01          | 10.42        | 10.72         | 4.36        | 11.58        |
| 120              | 401.57             | 18.22       | 0.02          | 1.24       | 11.59          | 0.35         | 2.04          | 0.04        | <0.01          | 23.04        | 26.17         | 17.84       | 31.67        |
| 130              | 524.05             | 25.41       | 0.05          | 0.49       | 12.54          | 0.39         | 2.81          | 0.07        | <0.01          | 35.46        | 38.06         | 24.91       | 45.48        |
| 140              | 586.36             | 36.11       | 0.10          | 0.44       | 13.56          | 0.38         | 2.92          | 0.06        | <0.01          | 42.59        | 45.16         | 35.65       | 57.54        |
| 150              | 642.01             | 41.00       | 0.19          | 0.54       | 14.16          | 0.56         | 3.66          | 0.08        | <0.01          | 41.32        | 44.24         | 40.56       | 60.02        |
| 160              | 690.89             | 36.01       | 0.36          | 0.71       | 12.21          | 0.51         | 4.89          | 0.09        | 0.02           | 40.19        | 42.77         | 35.45       | 55.55        |
| 170              | 736.65             | 28.06       | 0.53          | 0.89       | 4.68           | 0.52         | 5.90          | 0.10        | 0.03           | 41.72        | 43.35         | 26.58       | 50.85        |
| 180              | 781.63             | 24.14       | 0.61          | 1.00       | 3.64           | 0.57         | 6.05          | 0.11        | 0.03           | 39.81        | 41.90         | 21.54       | 47.11        |

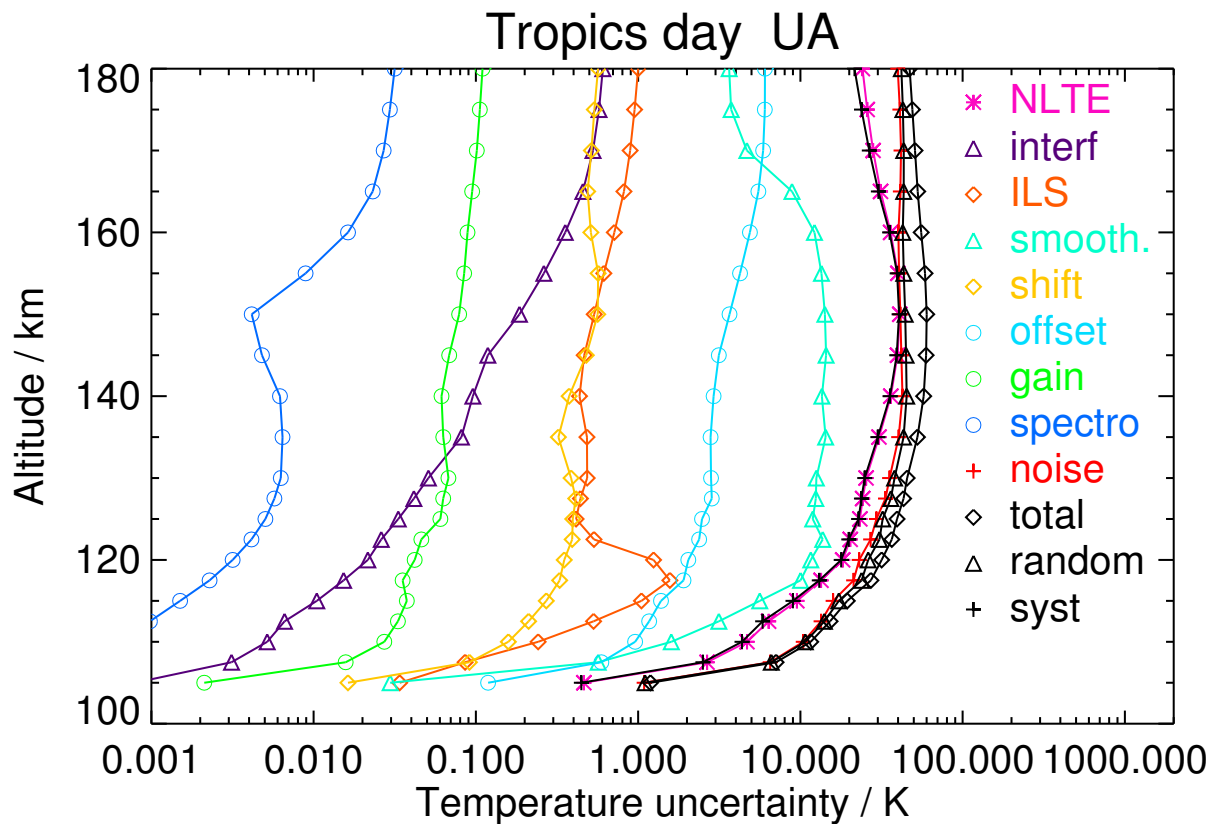

**Figure S221.** V8R\_TwNO\_662 Tropics day, high solar activity

**Table S223.** Temperature error budget for Tropics night, high solar activity. All uncertainties are  $1\sigma$ .

| altitude (km) | mean target (K) | NLTE (K) | interf (K) | ILS (K) | smooth. (K) | shift (K) | offset (K) | gain (K) | spectro (K) | noise (K) | random (K) | syst (K) | total (K) |
|---------------|-----------------|----------|------------|---------|-------------|-----------|------------|----------|-------------|-----------|------------|----------|-----------|
| 110           | 297.12          | 2.59     | <0.01      | 0.93    | 3.73        | 0.01      | 0.91       | <0.01    | <0.01       | 7.41      | 8.40       | 2.58     | 8.78      |
| 120           | 389.73          | 8.59     | 0.02       | 2.09    | 11.73       | 0.10      | 3.38       | 0.02     | <0.01       | 23.76     | 26.81      | 8.57     | 28.14     |
| 130           | 470.25          | 13.35    | 0.05       | 0.87    | 16.74       | 0.20      | 5.72       | 0.04     | 0.01        | 38.43     | 42.38      | 13.13    | 44.37     |
| 140           | 496.76          | 14.89    | 0.17       | 0.82    | 18.70       | 0.18      | 6.74       | 0.04     | <0.01       | 49.19     | 53.25      | 14.20    | 55.11     |
| 150           | 574.85          | 13.37    | 0.30       | 0.66    | 14.10       | 0.16      | 7.13       | 0.04     | <0.01       | 44.65     | 47.58      | 12.57    | 49.22     |
| 160           | 641.87          | 11.16    | 0.37       | 0.50    | 7.27        | 0.19      | 7.26       | 0.04     | <0.01       | 38.06     | 39.63      | 10.44    | 40.98     |
| 170           | 702.18          | 10.77    | 0.78       | 0.50    | 3.33        | 0.26      | 8.29       | 0.05     | 0.01        | 38.46     | 39.72      | 9.91     | 40.94     |

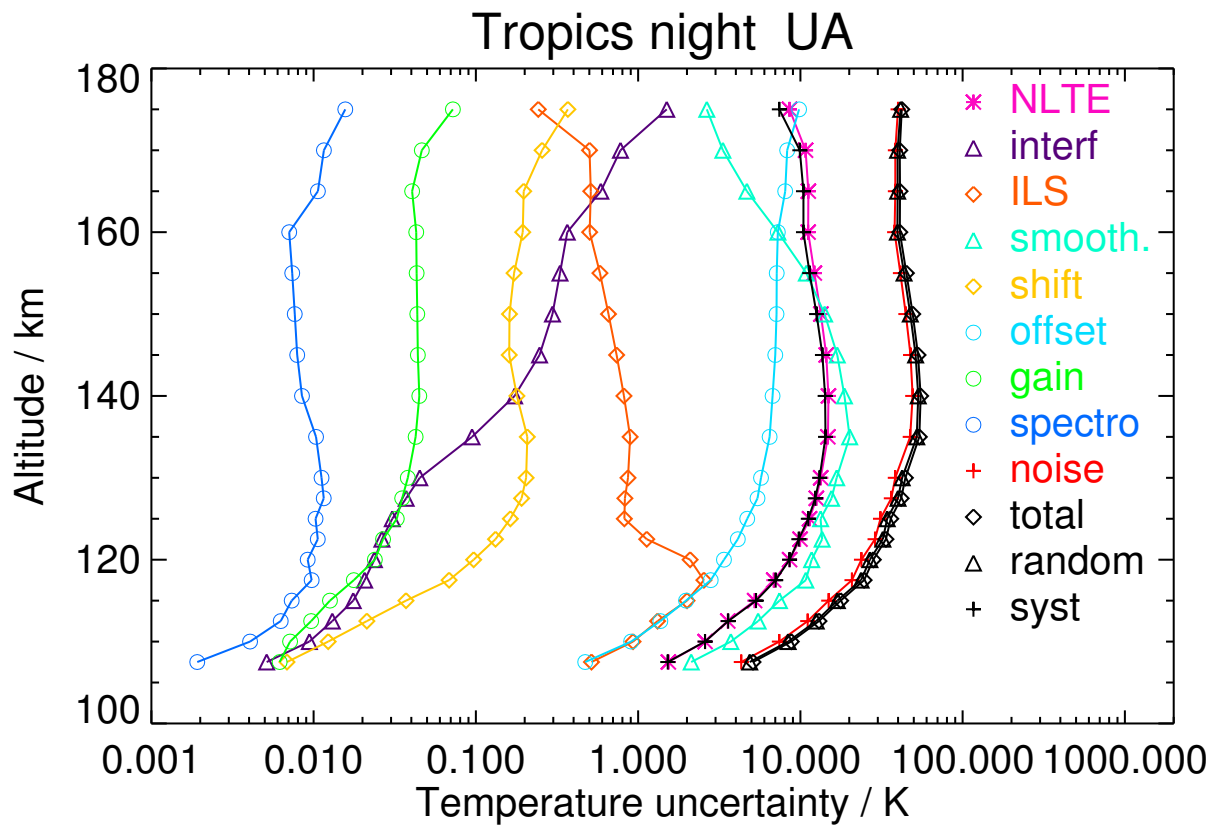

**Figure S222.** V8R\_TwNO\_662 Tropics night, high solar activity

**Table S224.** Temperature error budget for Southern midlatitude winter day, high solar activity. All uncertainties are  $1\sigma$ .

| altitude (km) | mean target (K) | NLTE (K) | interf (K) | ILS (K) | smooth. (K) | shift (K) | offset (K) | gain (K) | spectro (K) | noise (K) | random (K) | syst (K) | total (K) |
|---------------|-----------------|----------|------------|---------|-------------|-----------|------------|----------|-------------|-----------|------------|----------|-----------|
| 110           | 284.49          | 2.92     | <0.01      | 0.66    | 2.90        | 0.04      | 0.68       | 0.01     | <0.01       | 7.28      | 8.02       | 2.56     | 8.42      |
| 120           | 359.64          | 9.60     | 0.02       | 1.41    | 11.60       | 0.13      | 2.41       | 0.04     | <0.01       | 24.31     | 27.23      | 9.16     | 28.73     |
| 130           | 465.30          | 18.29    | 0.06       | 0.53    | 16.15       | 0.31      | 4.29       | 0.06     | <0.01       | 38.15     | 41.93      | 17.65    | 45.50     |
| 140           | 545.86          | 29.05    | 0.20       | 0.75    | 17.36       | 0.41      | 6.46       | 0.07     | <0.01       | 49.31     | 53.22      | 28.06    | 60.16     |
| 150           | 632.34          | 28.67    | 0.51       | 0.84    | 14.65       | 0.38      | 7.74       | 0.06     | 0.01        | 46.86     | 50.17      | 27.87    | 57.39     |
| 160           | 689.33          | 22.63    | 0.68       | 0.76    | 9.84        | 0.34      | 8.41       | 0.06     | 0.02        | 43.97     | 46.22      | 21.86    | 51.13     |
| 170           | 732.47          | 17.47    | 0.72       | 0.67    | 4.16        | 0.33      | 8.52       | 0.06     | 0.03        | 41.91     | 43.30      | 16.66    | 46.40     |
| 180           | 754.75          | 15.58    | 0.73       | 0.71    | 3.33        | 0.37      | 8.38       | 0.07     | 0.03        | 41.23     | 42.61      | 14.45    | 45.00     |

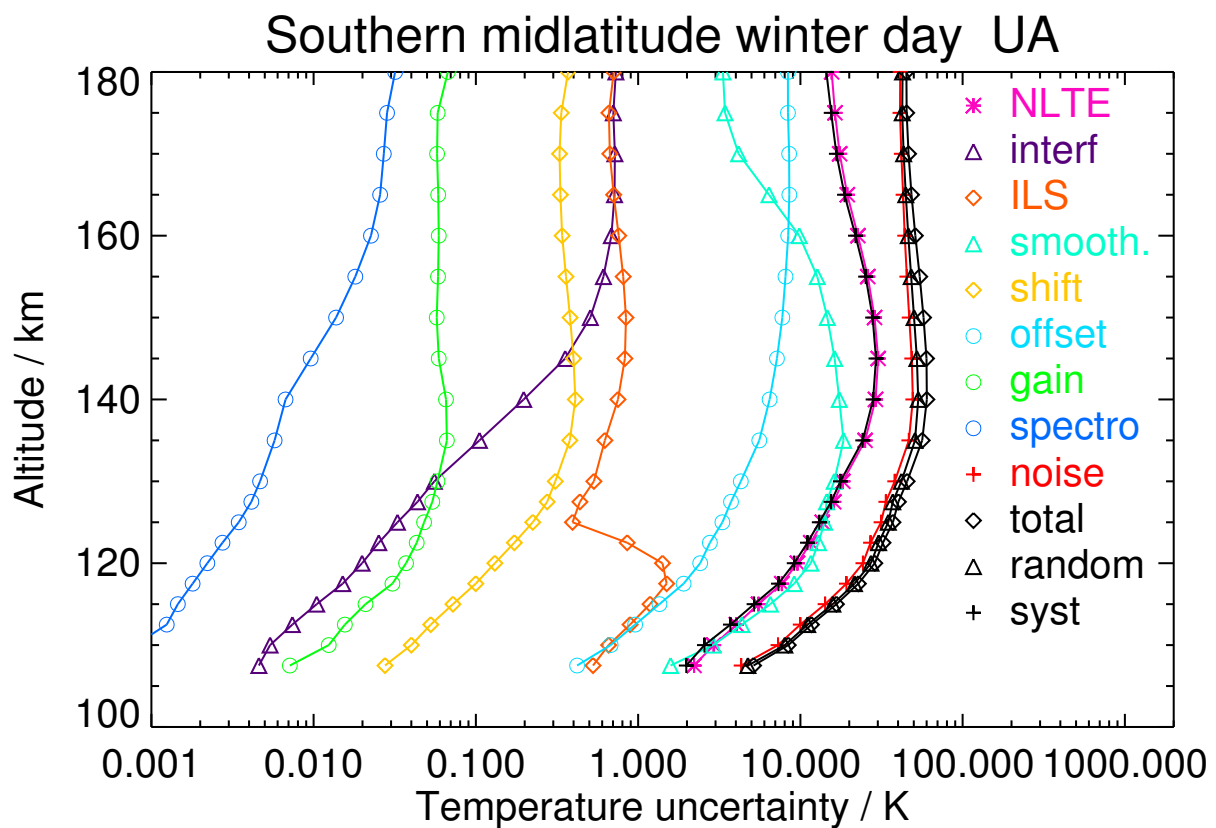

**Figure S223.** V8R\_TwNO\_662 Southern midlatitude winter day, high solar activity

**Table S225.** Temperature error budget for Southern midlatitude winter night, high solar activity. All uncertainties are  $1\sigma$ .

| altitude (km) | mean target (K) | NLTE (K) | interf (K) | ILS (K) | smooth. (K) | shift (K) | offset (K) | gain (K) | spectro (K) | noise (K) | random (K) | syst (K) | total (K) |
|---------------|-----------------|----------|------------|---------|-------------|-----------|------------|----------|-------------|-----------|------------|----------|-----------|
| 110           | 284.44          | 3.20     | <0.01      | 0.72    | 3.85        | 0.03      | 0.78       | 0.03     | <0.01       | 7.54      | 8.71       | 2.67     | 9.11      |
| 120           | 399.84          | 10.26    | 0.02       | 1.47    | 11.66       | 0.13      | 3.14       | 0.05     | <0.01       | 25.07     | 28.20      | 9.30     | 29.69     |
| 130           | 495.39          | 15.68    | 0.05       | 0.60    | 14.91       | 0.30      | 5.16       | 0.07     | <0.01       | 37.86     | 41.44      | 14.53    | 43.92     |
| 140           | 550.94          | 20.38    | 0.14       | 0.80    | 15.68       | 0.37      | 6.74       | 0.07     | <0.01       | 48.50     | 52.42      | 17.69    | 55.32     |
| 150           | 615.10          | 17.38    | 0.20       | 0.82    | 11.24       | 0.36      | 6.87       | 0.06     | 0.01        | 44.22     | 47.04      | 14.78    | 49.31     |
| 160           | 657.47          | 14.18    | 0.24       | 0.80    | 7.89        | 0.39      | 6.83       | 0.05     | 0.02        | 40.55     | 42.41      | 12.52    | 44.22     |
| 170           | 710.61          | 11.56    | 0.27       | 0.83    | 4.38        | 0.56      | 7.31       | 0.04     | 0.03        | 39.65     | 41.12      | 9.43     | 42.18     |
| 180           | 734.21          | 8.57     | 0.09       | 1.27    | 4.07        | 0.54      | 6.77       | 0.02     | 0.05        | 39.81     | 40.59      | 8.67     | 41.51     |

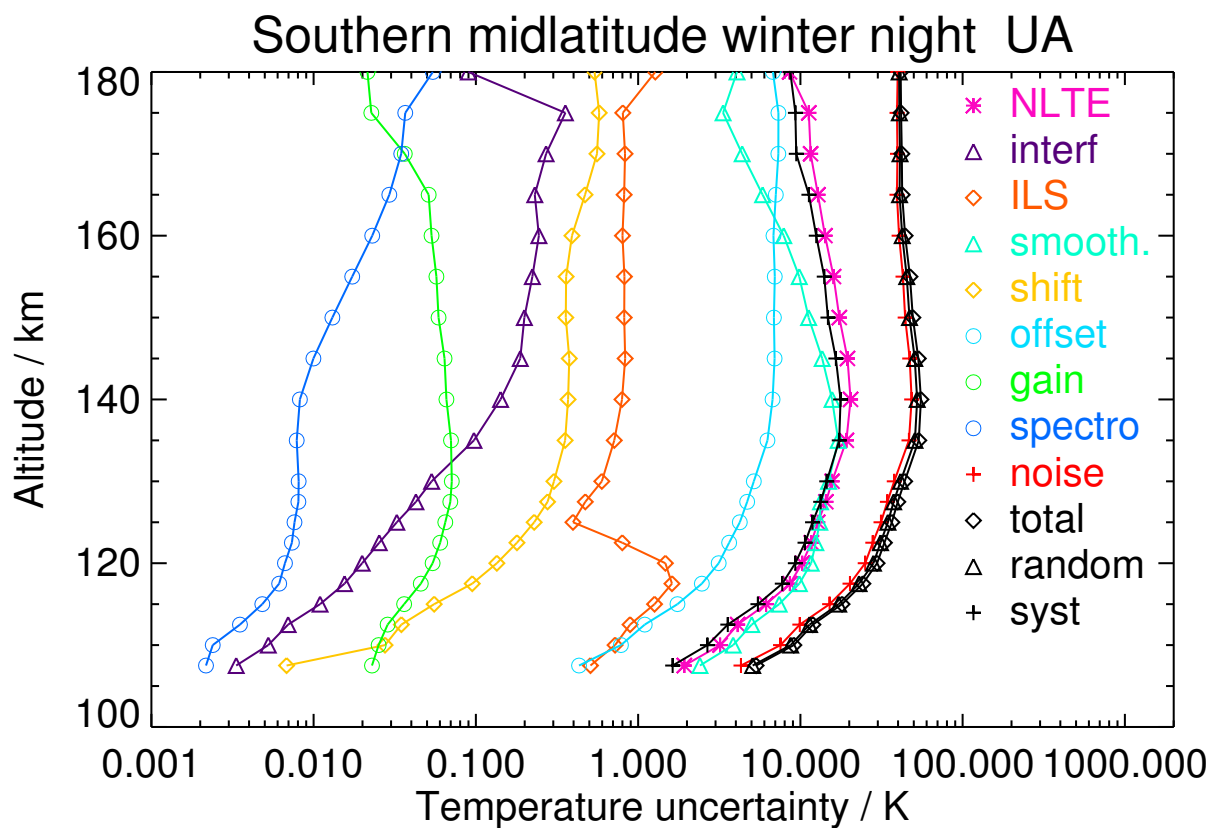

**Figure S224.** V8R\_TwNO\_662 Southern midlatitude winter night, high solar activity

**Table S226.** Temperature error budget for Southern midlatitude spring day, high solar activity. All uncertainties are  $1\sigma$ .

| altitude (km) | mean target (K) | NLTE (K) | interf (K) | ILS (K) | smooth. (K) | shift (K) | offset (K) | gain (K) | spectro (K) | noise (K) | random (K) | syst (K) | total (K) |
|---------------|-----------------|----------|------------|---------|-------------|-----------|------------|----------|-------------|-----------|------------|----------|-----------|
| 110           | 300.94          | 9.74     | 0.01       | 0.99    | 2.82        | 0.41      | 1.01       | 0.03     | <0.01       | 10.14     | 11.67      | 8.46     | 14.42     |
| 120           | 417.32          | 24.78    | 0.02       | 3.39    | 10.33       | 0.47      | 1.77       | 0.04     | <0.01       | 20.62     | 24.00      | 24.19    | 34.07     |
| 130           | 530.25          | 24.44    | 0.08       | 1.05    | 11.51       | 0.46      | 1.84       | 0.06     | <0.01       | 31.34     | 34.13      | 23.50    | 41.44     |
| 140           | 590.17          | 37.82    | 0.27       | 0.55    | 11.31       | 0.53      | 2.20       | 0.06     | <0.01       | 40.18     | 42.36      | 37.20    | 56.38     |
| 150           | 692.46          | 47.65    | 0.33       | 0.77    | 10.72       | 0.88      | 2.69       | 0.06     | <0.01       | 40.19     | 42.22      | 47.19    | 63.32     |
| 160           | 790.56          | 40.68    | 0.80       | 0.85    | 7.67        | 0.63      | 3.85       | 0.12     | <0.01       | 35.77     | 37.82      | 39.74    | 54.86     |
| 170           | 858.94          | 32.25    | 1.72       | 1.12    | 3.59        | 0.55      | 5.65       | 0.21     | 0.02        | 35.24     | 37.30      | 30.66    | 48.28     |
| 180           | 911.64          | 32.94    | 2.23       | 1.53    | 1.61        | 1.06      | 6.76       | 0.25     | 0.02        | 37.26     | 40.34      | 30.05    | 50.30     |

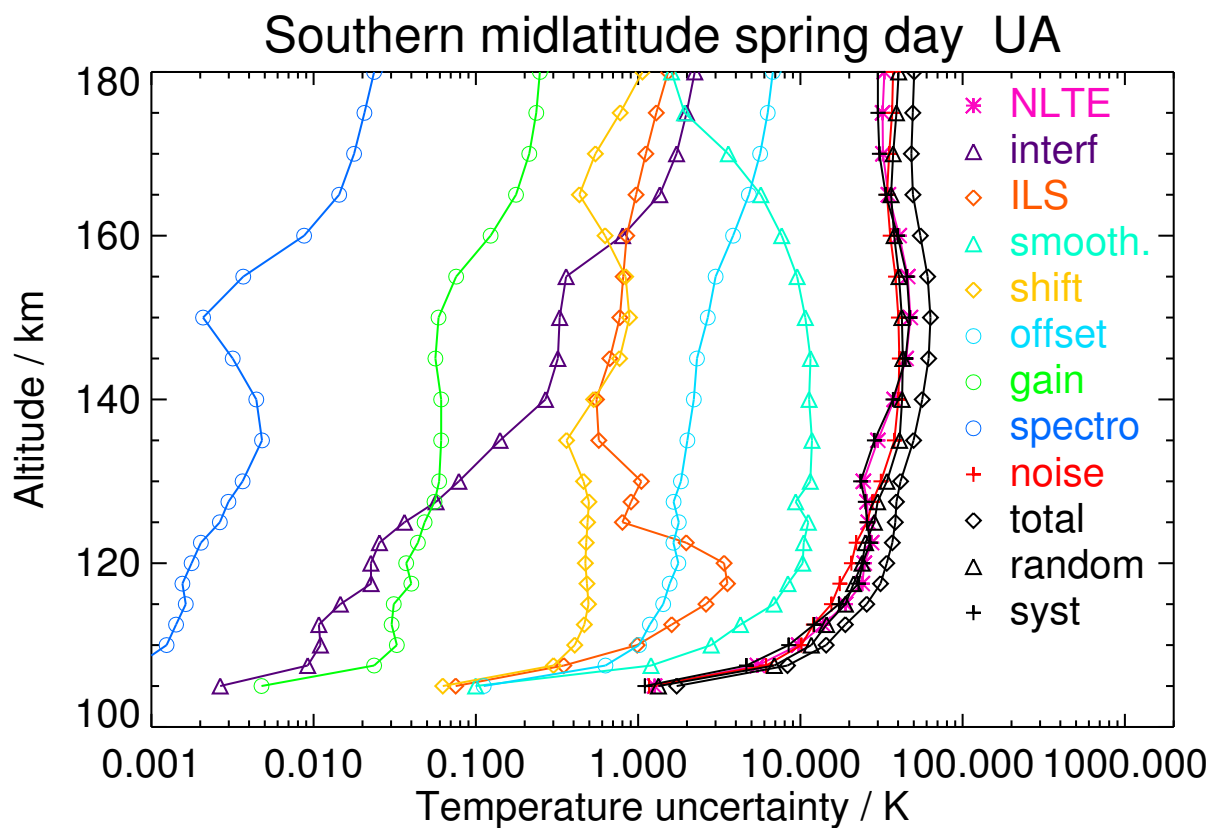

**Figure S225.** V8R\_TwNO\_662 Southern midlatitude spring day, high solar activity

**Table S227.** Temperature error budget for Southern midlatitude spring night, high solar activity. All uncertainties are  $1\sigma$ .

| altitude (km) | mean target (K) | NLTE (K) | interf (K) | ILS (K) | smooth. (K) | shift (K) | offset (K) | gain (K) | spectro (K) | noise (K) | random (K) | syst (K) | total (K) |
|---------------|-----------------|----------|------------|---------|-------------|-----------|------------|----------|-------------|-----------|------------|----------|-----------|
| 110           | 295.85          | 5.96     | 0.02       | 1.09    | 3.69        | 0.05      | 0.78       | 0.06     | <0.01       | 8.00      | 9.43       | 5.10     | 10.72     |
| 120           | 393.72          | 15.38    | 0.09       | 2.47    | 10.69       | 0.17      | 2.09       | 0.07     | 0.01        | 21.13     | 24.42      | 14.54    | 28.42     |
| 130           | 501.86          | 20.37    | 0.22       | 0.80    | 14.04       | 0.47      | 2.89       | 0.08     | 0.02        | 32.83     | 36.31      | 19.49    | 41.21     |
| 140           | 586.86          | 32.39    | 0.31       | 0.68    | 15.03       | 0.57      | 4.45       | 0.08     | 0.01        | 46.10     | 49.43      | 31.27    | 58.49     |
| 150           | 676.22          | 32.40    | 1.25       | 0.83    | 12.81       | 0.53      | 5.70       | 0.09     | 0.01        | 45.42     | 48.67      | 30.72    | 57.55     |
| 160           | 743.26          | 23.71    | 1.91       | 0.93    | 8.63        | 0.50      | 7.07       | 0.12     | 0.02        | 41.73     | 44.13      | 22.04    | 49.33     |
| 170           | 798.15          | 18.82    | 2.18       | 0.95    | 3.65        | 0.72      | 8.05       | 0.14     | 0.03        | 41.78     | 43.67      | 16.65    | 46.73     |
| 180           | 848.70          | 19.26    | 2.58       | 1.03    | 2.29        | 0.96      | 8.44       | 0.15     | 0.03        | 41.88     | 44.07      | 16.37    | 47.01     |

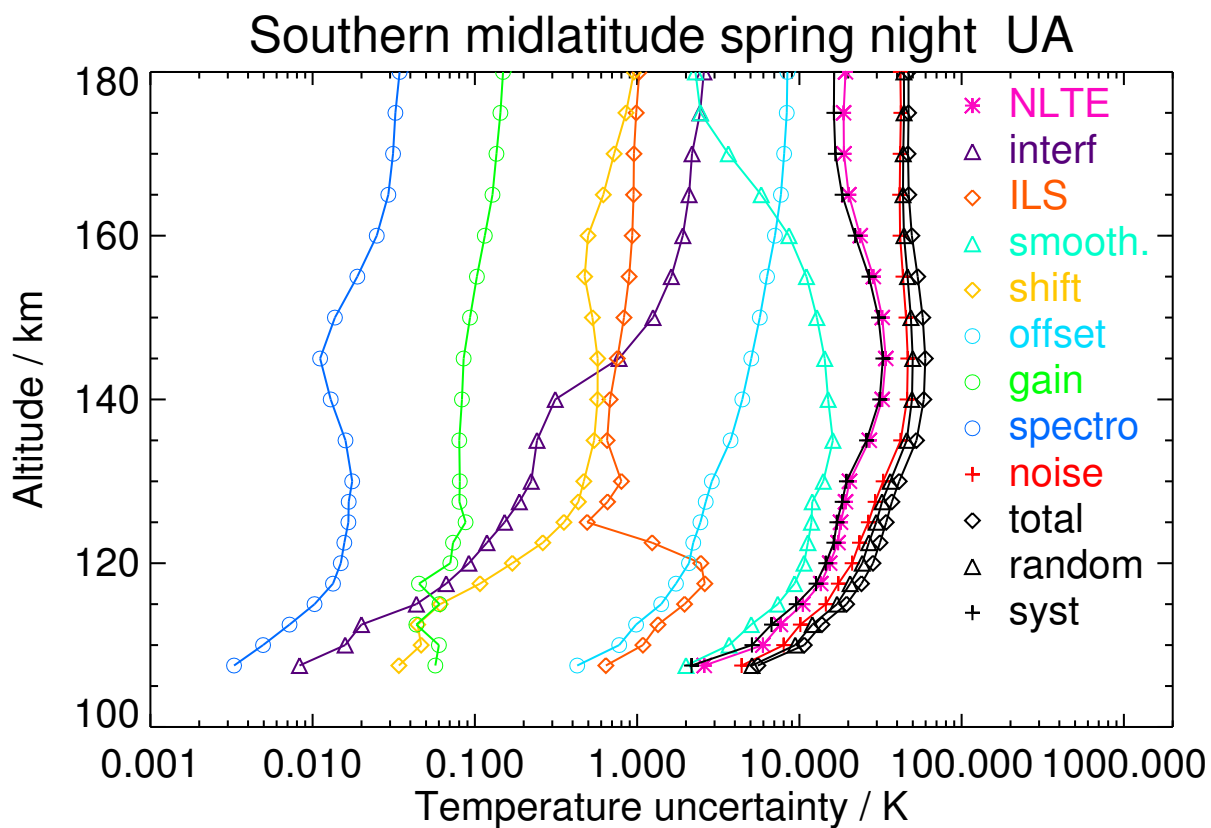

**Figure S226.** V8R\_TwNO\_662 Southern midlatitude spring night, high solar activity

**Table S228.** Temperature error budget for Southern midlatitude summer day, high solar activity. All uncertainties are  $1\sigma$ .

| altitude (km) | mean target (K) | NLTE (K) | interf (K) | ILS (K) | smooth. (K) | shift (K) | offset (K) | gain (K) | spectro (K) | noise (K) | random (K) | syst (K) | total (K) |
|---------------|-----------------|----------|------------|---------|-------------|-----------|------------|----------|-------------|-----------|------------|----------|-----------|
| 110           | 313.40          | 8.96     | 0.01       | 1.42    | 3.75        | 0.28      | 0.92       | 0.03     | <0.01       | 9.55      | 10.97      | 8.26     | 13.73     |
| 120           | 410.50          | 26.07    | 0.04       | 4.08    | 10.68       | 0.32      | 1.85       | 0.03     | <0.01       | 19.98     | 23.33      | 25.86    | 34.83     |
| 130           | 502.55          | 24.98    | 0.10       | 1.16    | 11.86       | 0.42      | 1.86       | 0.04     | <0.01       | 29.67     | 32.56      | 24.28    | 40.62     |
| 140           | 575.65          | 34.40    | 0.35       | 0.72    | 11.21       | 0.72      | 2.25       | 0.05     | <0.01       | 39.29     | 41.39      | 33.85    | 53.47     |
| 150           | 675.98          | 42.55    | 0.48       | 0.94    | 10.72       | 0.91      | 2.67       | 0.07     | <0.01       | 39.35     | 41.53      | 41.94    | 59.02     |
| 160           | 772.39          | 34.30    | 1.05       | 0.93    | 8.07        | 0.59      | 3.64       | 0.13     | 0.01        | 34.50     | 36.61      | 33.28    | 49.47     |
| 170           | 832.70          | 27.20    | 1.85       | 1.13    | 3.80        | 0.65      | 5.40       | 0.21     | 0.02        | 33.08     | 35.14      | 25.45    | 43.39     |
| 180           | 877.99          | 28.71    | 2.34       | 1.53    | 1.83        | 1.00      | 6.62       | 0.23     | 0.02        | 35.72     | 38.33      | 26.21    | 46.43     |

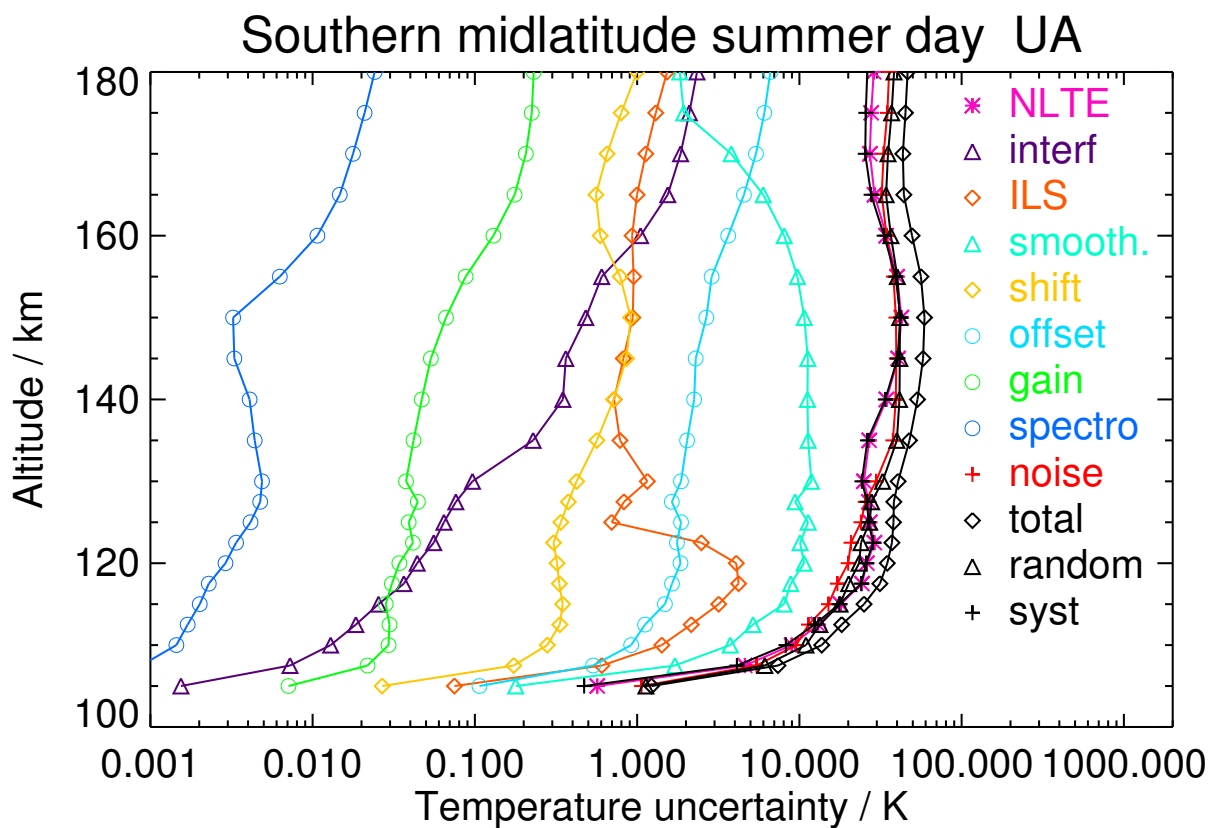

**Figure S227.** V8R\_TwNO\_662 Southern midlatitude summer day, high solar activity



**Table S229.** Temperature error budget for Southern midlatitude summer night, high solar activity. All uncertainties are  $1\sigma$ .

| altitude (km) | mean target (K) | NLTE (K) | interf (K) | ILS (K) | smooth. (K) | shift (K) | offset (K) | gain (K) | spectro (K) | noise (K) | random (K) | syst (K) | total (K) |
|---------------|-----------------|----------|------------|---------|-------------|-----------|------------|----------|-------------|-----------|------------|----------|-----------|
| 110           | 296.08          | 3.69     | 0.02       | 0.85    | 3.68        | 0.03      | 0.80       | 0.02     | <0.01       | 7.63      | 8.80       | 3.07     | 9.32      |
| 120           | 365.28          | 10.34    | 0.05       | 2.15    | 11.02       | 0.10      | 2.60       | 0.05     | 0.02        | 24.21     | 27.26      | 9.08     | 28.74     |
| 130           | 482.81          | 16.93    | 0.14       | 0.73    | 14.87       | 0.30      | 4.48       | 0.05     | 0.02        | 37.08     | 40.73      | 15.63    | 43.63     |
| 140           | 573.55          | 23.91    | 0.45       | 0.73    | 15.90       | 0.39      | 6.66       | 0.06     | 0.01        | 49.19     | 52.84      | 22.31    | 57.35     |
| 150           | 628.53          | 22.07    | 1.01       | 0.70    | 13.29       | 0.37      | 7.57       | 0.07     | 0.02        | 45.53     | 48.98      | 19.91    | 52.87     |
| 160           | 686.66          | 16.66    | 1.14       | 0.71    | 8.47        | 0.39      | 8.34       | 0.08     | 0.03        | 41.69     | 44.02      | 14.85    | 46.46     |
| 170           | 733.80          | 12.59    | 1.30       | 0.78    | 3.89        | 0.43      | 8.83       | 0.08     | 0.03        | 41.39     | 42.94      | 11.11    | 44.36     |
| 180           | 774.70          | 11.10    | 1.51       | 0.93    | 3.19        | 0.49      | 8.79       | 0.09     | 0.04        | 41.58     | 43.09      | 9.27     | 44.08     |

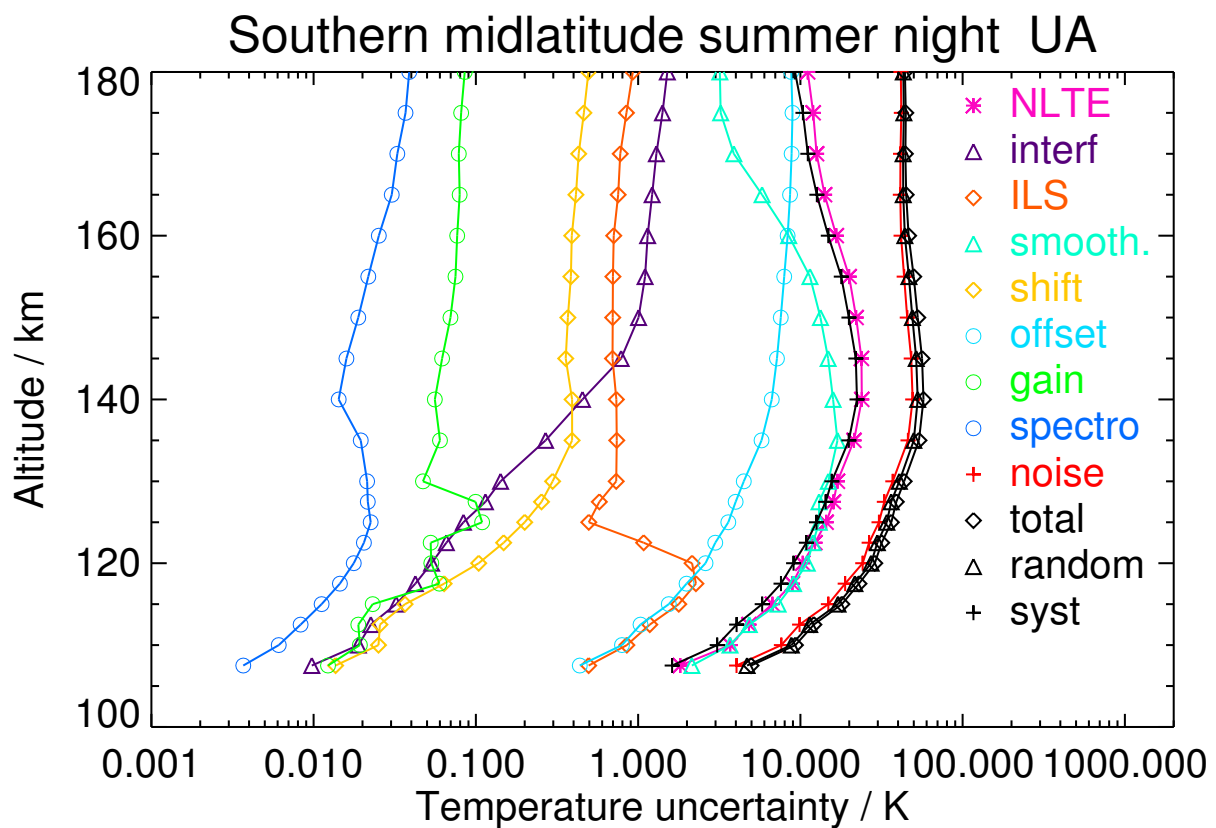

**Figure S228.** V8R\_TwNO\_662 Southern midlatitude summer night, high solar activity

**Table S230.** Temperature error budget for Southern midlatitude autumn day, high solar activity. All uncertainties are  $1\sigma$ .

| altitude (km) | mean target (K) | NLTE (K) | interf (K) | ILS (K) | smooth. (K) | shift (K) | offset (K) | gain (K) | spectro (K) | noise (K) | random (K) | syst (K) | total (K) |
|---------------|-----------------|----------|------------|---------|-------------|-----------|------------|----------|-------------|-----------|------------|----------|-----------|
| 110           | 271.03          | 3.23     | <0.01      | 0.50    | 2.88        | 0.06      | 0.79       | <0.01    | <0.01       | 8.34      | 8.97       | 2.97     | 9.45      |
| 120           | 357.39          | 11.52    | 0.01       | 1.38    | 12.14       | 0.14      | 2.57       | 0.02     | <0.01       | 25.84     | 28.81      | 11.22    | 30.92     |
| 130           | 457.58          | 20.38    | 0.02       | 0.38    | 16.88       | 0.27      | 4.07       | 0.05     | <0.01       | 38.70     | 42.63      | 19.93    | 47.06     |
| 140           | 538.07          | 32.85    | 0.04       | 0.67    | 18.53       | 0.40      | 5.30       | 0.06     | <0.01       | 47.19     | 51.26      | 32.42    | 60.65     |
| 150           | 605.37          | 34.31    | 0.15       | 0.79    | 17.29       | 0.45      | 6.01       | 0.05     | <0.01       | 44.19     | 48.13      | 33.92    | 58.88     |
| 160           | 683.27          | 28.33    | 0.34       | 0.85    | 12.25       | 0.37      | 7.06       | 0.05     | 0.02        | 42.18     | 44.71      | 27.99    | 52.75     |
| 170           | 749.14          | 21.93    | 0.45       | 0.88    | 5.28        | 0.33      | 7.85       | 0.06     | 0.02        | 42.58     | 43.86      | 21.46    | 48.83     |
| 180           | 791.02          | 18.80    | 0.51       | 0.90    | 3.23        | 0.34      | 7.97       | 0.06     | 0.02        | 41.50     | 42.67      | 18.17    | 46.38     |

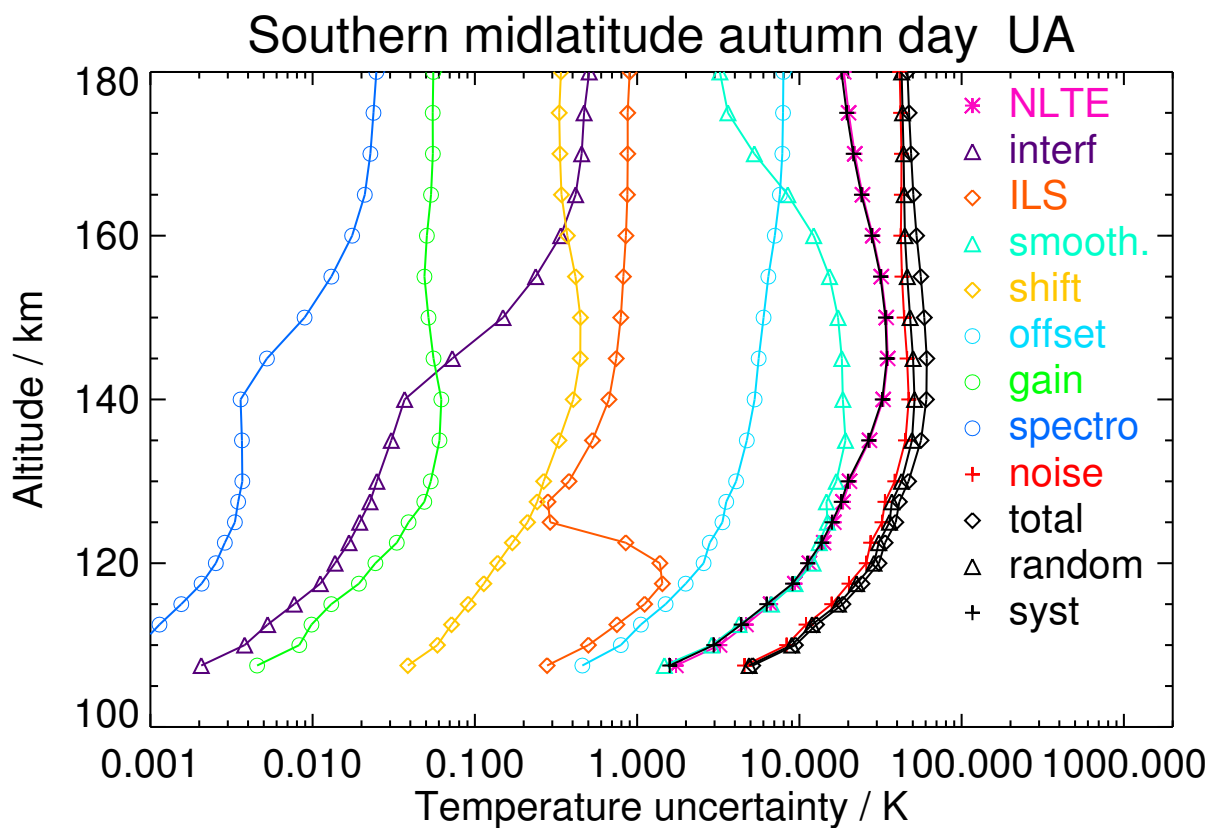

**Figure S229.** V8R\_TwNO\_662 Southern midlatitude autumn day, high solar activity

**Table S231.** Temperature error budget for Southern midlatitude autumn night, high solar activity. All uncertainties are  $1\sigma$ .

| altitude (km) | mean target (K) | NLTE (K) | interf (K) | ILS (K) | smooth. (K) | shift (K) | offset (K) | gain (K) | spectro (K) | noise (K) | random (K) | syst (K) | total (K) |
|---------------|-----------------|----------|------------|---------|-------------|-----------|------------|----------|-------------|-----------|------------|----------|-----------|
| 110           | 267.39          | 6.00     | 0.02       | 0.57    | 3.78        | 0.03      | 0.73       | 0.03     | <0.01       | 8.22      | 9.97       | 4.40     | 10.89     |
| 120           | 367.44          | 7.95     | 0.03       | 0.77    | 10.47       | 0.09      | 2.81       | 0.05     | <0.01       | 25.18     | 27.72      | 6.83     | 28.55     |
| 130           | 475.31          | 14.15    | 0.11       | 0.33    | 13.93       | 0.24      | 5.13       | 0.05     | 0.01        | 39.58     | 42.67      | 12.91    | 44.58     |
| 140           | 588.00          | 22.19    | 0.56       | 0.37    | 14.75       | 0.27      | 8.08       | 0.06     | <0.01       | 51.81     | 55.25      | 20.18    | 58.82     |
| 150           | 651.75          | 21.11    | 0.90       | 0.45    | 10.60       | 0.26      | 8.50       | 0.07     | <0.01       | 47.26     | 50.28      | 18.35    | 53.53     |
| 160           | 699.39          | 18.10    | 1.16       | 0.54    | 6.52        | 0.19      | 8.42       | 0.08     | 0.01        | 41.04     | 43.57      | 15.13    | 46.12     |
| 170           | 741.68          | 18.28    | 1.70       | 0.77    | 3.73        | 0.28      | 8.45       | 0.10     | 0.01        | 41.17     | 43.61      | 14.70    | 46.02     |
| 180           | 786.92          | 21.73    | 1.92       | 1.09    | 3.03        | 0.52      | 8.02       | 0.12     | 0.02        | 42.62     | 45.35      | 17.60    | 48.65     |

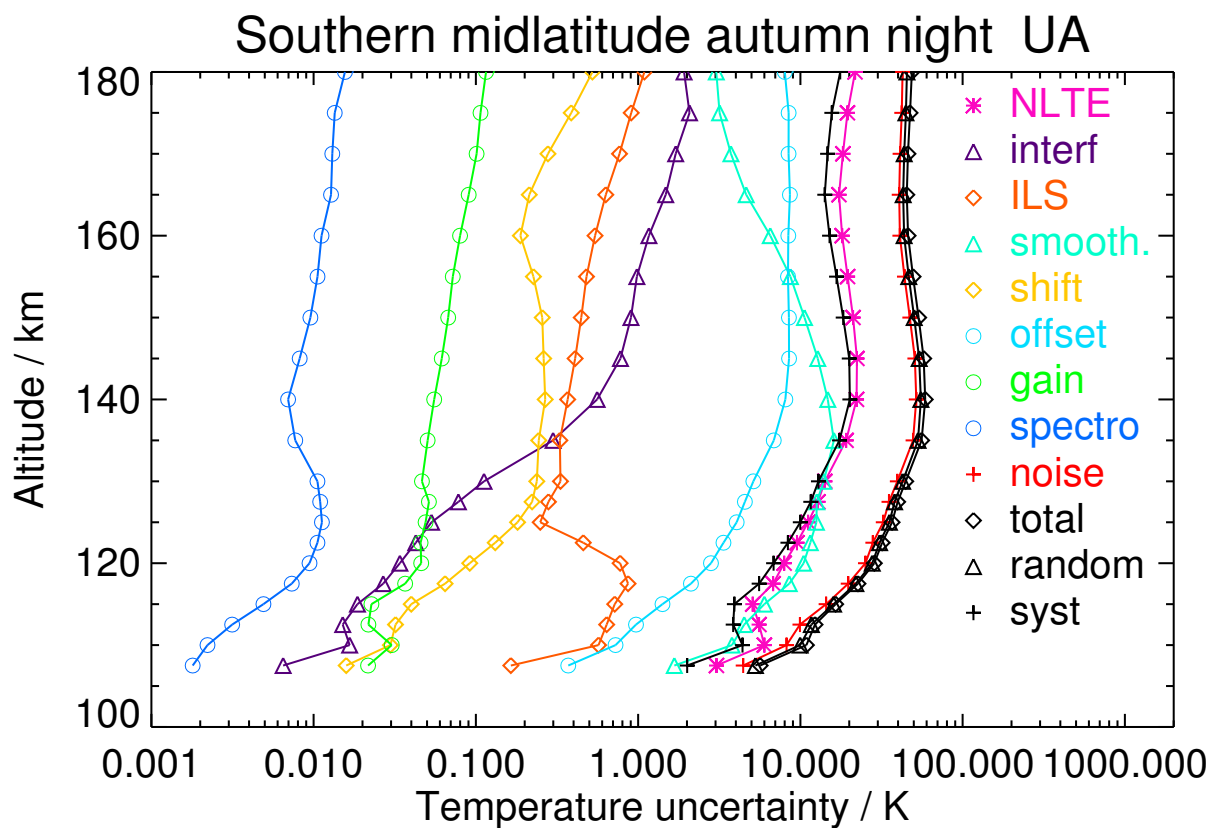

**Figure S230.** V8R\_TwNO\_662 Southern midlatitude autumn night, high solar activity

**Table S232.** Temperature error budget for Southern polar winter day, high solar activity. All uncertainties are  $1\sigma$ .

| altitude (km) | mean target (K) | NLTE (K) | interf (K) | ILS (K) | smooth. (K) | shift (K) | offset (K) | gain (K) | spectro (K) | noise (K) | random (K) | syst (K) | total (K) |
|---------------|-----------------|----------|------------|---------|-------------|-----------|------------|----------|-------------|-----------|------------|----------|-----------|
| 110           | 276.75          | 3.44     | <0.01      | 0.59    | 3.62        | 0.02      | 0.76       | 0.01     | <0.01       | 7.24      | 8.22       | 3.27     | 8.85      |
| 120           | 386.08          | 12.04    | 0.03       | 1.45    | 12.83       | 0.15      | 2.56       | 0.04     | <0.01       | 24.33     | 27.90      | 11.49    | 30.17     |
| 130           | 496.31          | 20.85    | 0.08       | 0.65    | 15.78       | 0.40      | 4.26       | 0.07     | <0.01       | 37.80     | 41.50      | 20.22    | 46.16     |
| 140           | 569.60          | 29.42    | 0.27       | 0.86    | 16.92       | 0.45      | 6.22       | 0.08     | 0.01        | 48.86     | 52.58      | 28.53    | 59.82     |
| 150           | 635.22          | 26.14    | 0.69       | 0.84    | 14.25       | 0.37      | 7.43       | 0.06     | 0.03        | 46.85     | 49.98      | 25.30    | 56.02     |
| 160           | 694.10          | 19.49    | 0.89       | 0.77    | 9.07        | 0.32      | 8.25       | 0.06     | 0.04        | 43.72     | 45.73      | 18.75    | 49.43     |
| 170           | 740.42          | 14.62    | 0.96       | 0.70    | 4.01        | 0.32      | 8.58       | 0.06     | 0.05        | 42.17     | 43.46      | 13.97    | 45.64     |
| 180           | 779.60          | 12.64    | 1.03       | 0.75    | 2.91        | 0.37      | 8.55       | 0.07     | 0.05        | 42.17     | 43.37      | 11.86    | 44.96     |

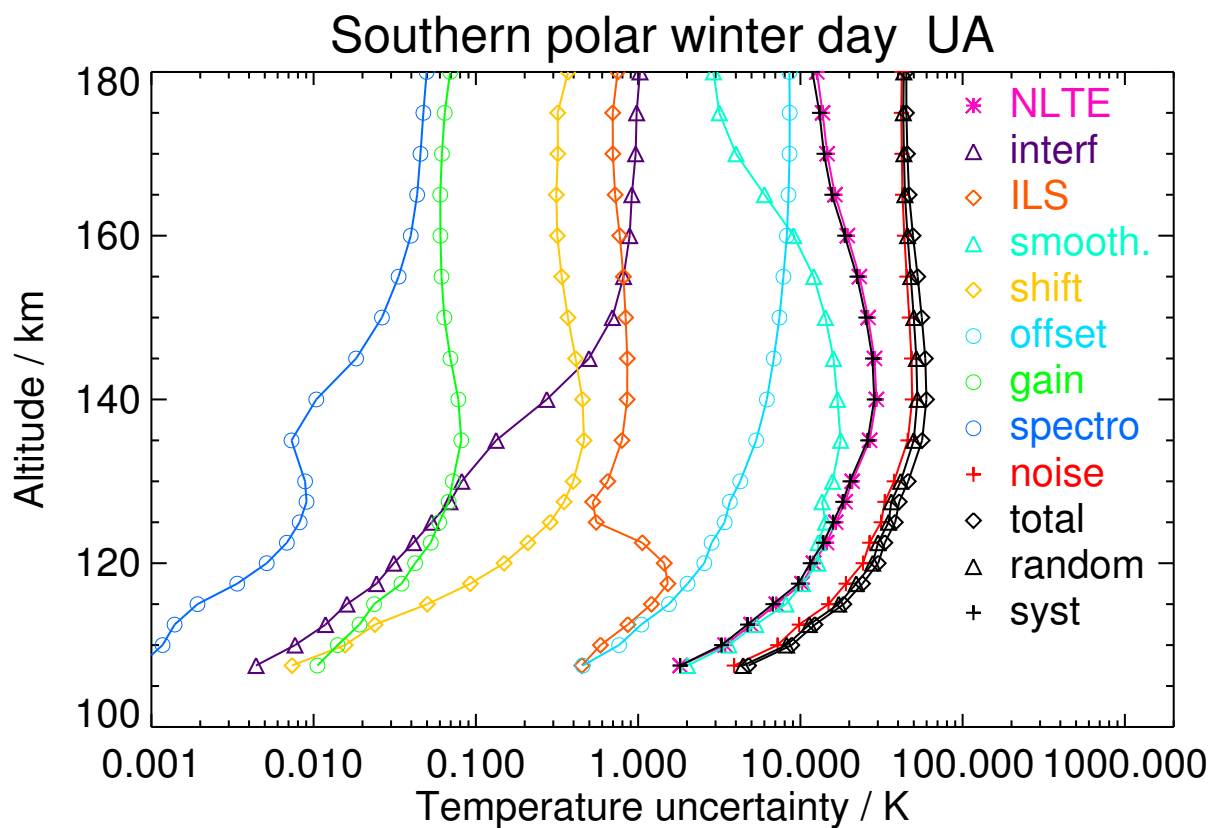

**Figure S231.** V8R\_TwNO\_662 Southern polar winter day, high solar activity

**Table S233.** Temperature error budget for Southern polar winter night, high solar activity. All uncertainties are  $1\sigma$ .

| altitude (km) | mean target (K) | NLTE (K) | interf (K) | ILS (K) | smooth. (K) | shift (K) | offset (K) | gain (K) | spectro (K) | noise (K) | random (K) | syst (K) | total (K) |
|---------------|-----------------|----------|------------|---------|-------------|-----------|------------|----------|-------------|-----------|------------|----------|-----------|
| 110           | 284.58          | 4.26     | <0.01      | 0.65    | 4.17        | 0.05      | 0.76       | 0.04     | <0.01       | 8.38      | 9.66       | 3.67     | 10.33     |
| 120           | 400.76          | 13.85    | 0.01       | 1.43    | 11.71       | 0.21      | 2.34       | 0.06     | <0.01       | 22.52     | 25.87      | 13.21    | 29.05     |
| 130           | 505.67          | 21.98    | 0.03       | 0.61    | 14.67       | 0.43      | 3.56       | 0.09     | <0.01       | 34.67     | 38.41      | 20.95    | 43.75     |
| 140           | 563.29          | 29.79    | 0.06       | 0.80    | 16.56       | 0.52      | 5.02       | 0.07     | <0.01       | 46.71     | 50.66      | 28.33    | 58.05     |
| 150           | 614.89          | 26.17    | 0.09       | 0.89    | 15.11       | 0.53      | 5.92       | 0.05     | 0.02        | 46.27     | 49.76      | 24.78    | 55.59     |
| 160           | 656.57          | 19.08    | 0.11       | 0.88    | 10.79       | 0.53      | 6.40       | 0.04     | 0.03        | 42.60     | 44.85      | 18.06    | 48.35     |
| 170           | 690.91          | 14.08    | 0.11       | 0.91    | 5.67        | 0.58      | 6.89       | 0.04     | 0.03        | 41.37     | 42.67      | 13.03    | 44.61     |
| 180           | 710.04          | 11.88    | 0.08       | 0.96    | 4.66        | 0.64      | 6.84       | 0.04     | 0.04        | 40.44     | 41.62      | 10.67    | 42.97     |

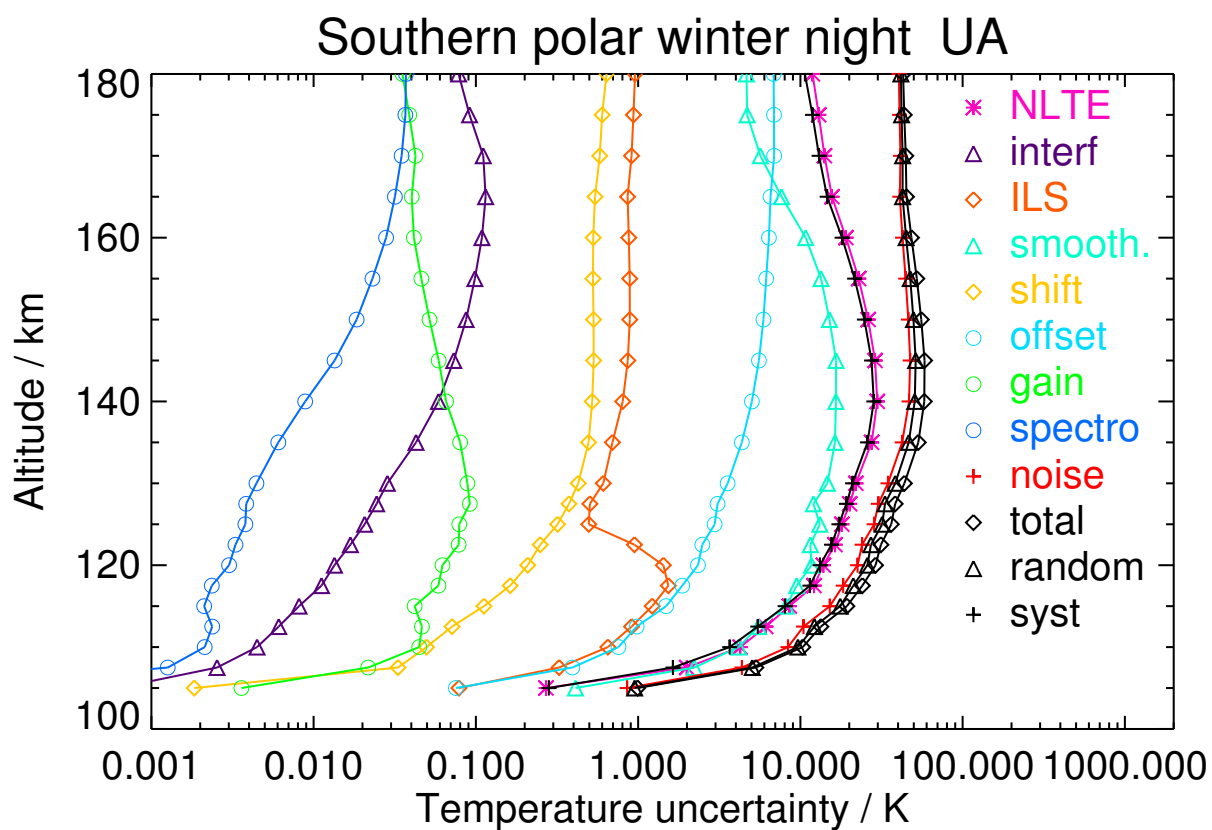

**Figure S232.** V8R\_TwNO\_662 Southern polar winter night, high solar activity

**Table S234.** Temperature error budget for Southern polar spring day, high solar activity. All uncertainties are  $1\sigma$ .

| altitude (km) | mean target (K) | NLTE (K) | interf (K) | ILS (K) | smooth. (K) | shift (K) | offset (K) | gain (K) | spectro (K) | noise (K) | random (K) | syst (K) | total (K) |
|---------------|-----------------|----------|------------|---------|-------------|-----------|------------|----------|-------------|-----------|------------|----------|-----------|
| 110           | 319.17          | 11.84    | 0.02       | 1.77    | 4.09        | 0.17      | 0.82       | 0.05     | <0.01       | 8.89      | 10.82      | 11.08    | 15.49     |
| 120           | 462.60          | 28.85    | 0.05       | 4.53    | 8.04        | 0.38      | 1.42       | 0.06     | <0.01       | 19.27     | 22.54      | 27.98    | 35.93     |
| 130           | 556.10          | 22.24    | 0.16       | 0.79    | 8.86        | 0.54      | 1.64       | 0.04     | <0.01       | 30.29     | 32.41      | 21.08    | 38.66     |
| 140           | 627.35          | 37.31    | 0.48       | 0.56    | 9.24        | 0.84      | 2.24       | 0.04     | <0.01       | 41.25     | 42.88      | 36.70    | 56.44     |
| 150           | 719.03          | 43.98    | 0.92       | 0.74    | 8.89        | 0.89      | 2.58       | 0.10     | <0.01       | 40.25     | 42.83      | 42.53    | 60.35     |
| 160           | 794.84          | 36.12    | 1.61       | 0.78    | 6.85        | 0.68      | 3.45       | 0.12     | 0.02        | 34.86     | 37.71      | 34.05    | 50.81     |
| 170           | 850.49          | 26.89    | 2.27       | 1.19    | 3.53        | 0.66      | 4.88       | 0.17     | 0.02        | 31.23     | 33.29      | 25.16    | 41.73     |
| 180           | 903.43          | 30.10    | 2.91       | 1.93    | 1.34        | 1.29      | 6.17       | 0.21     | 0.03        | 34.29     | 37.03      | 27.64    | 46.21     |

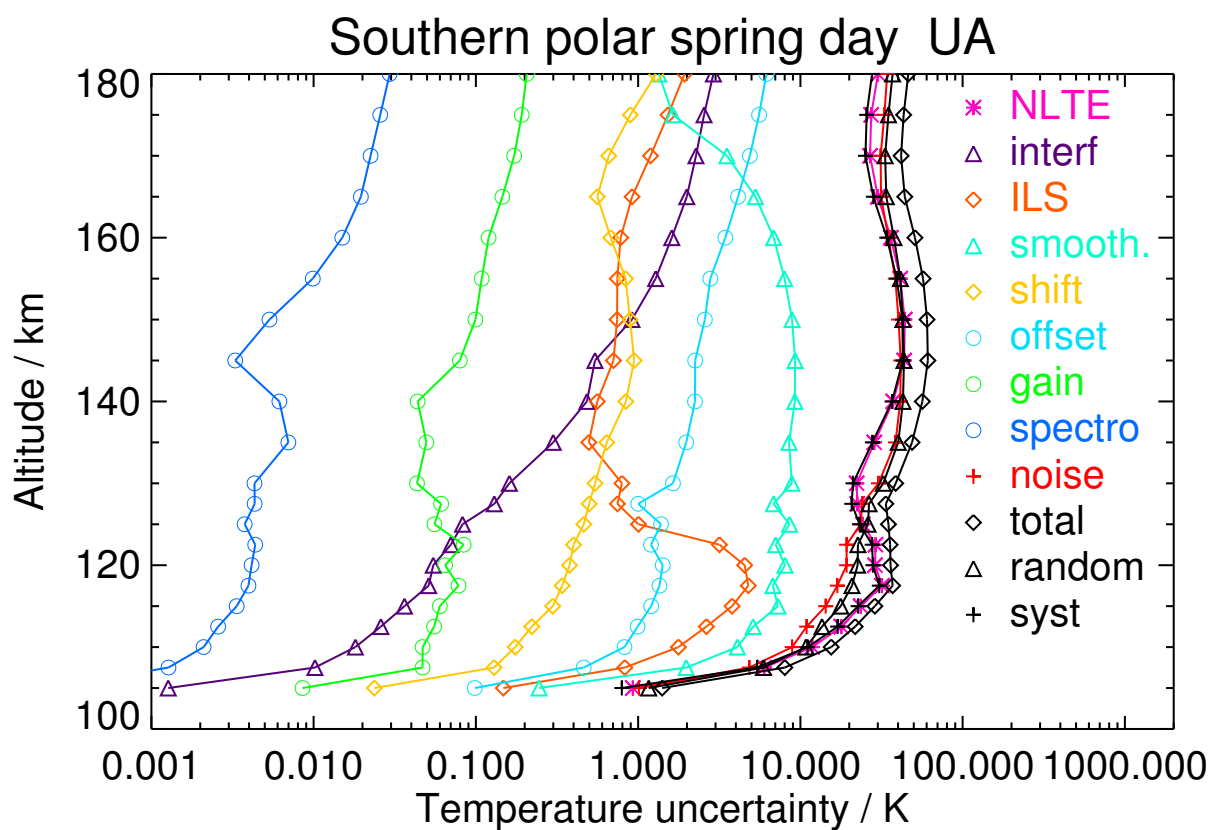

**Figure S233.** V8R\_TwNO\_662 Southern polar spring day, high solar activity

**Table S235.** Temperature error budget for Southern polar spring night, high solar activity. All uncertainties are  $1\sigma$ .

| altitude (km) | mean target (K) | NLTE (K) | interf (K) | ILS (K) | smooth. (K) | shift (K) | offset (K) | gain (K) | spectro (K) | noise (K) | random (K) | syst (K) | total (K) |
|---------------|-----------------|----------|------------|---------|-------------|-----------|------------|----------|-------------|-----------|------------|----------|-----------|
| 110           | 300.01          | 6.16     | 0.01       | 1.00    | 3.69        | 0.04      | 0.81       | 0.04     | <0.01       | 8.55      | 9.96       | 5.21     | 11.24     |
| 120           | 429.58          | 18.30    | 0.04       | 2.07    | 10.31       | 0.18      | 2.15       | 0.08     | 0.01        | 21.73     | 25.40      | 16.65    | 30.37     |
| 130           | 537.02          | 21.56    | 0.06       | 0.70    | 12.69       | 0.47      | 3.13       | 0.07     | 0.02        | 33.80     | 36.84      | 20.53    | 42.18     |
| 140           | 590.34          | 32.21    | 0.31       | 0.62    | 13.97       | 0.58      | 4.37       | 0.07     | 0.01        | 46.06     | 49.18      | 30.90    | 58.08     |
| 150           | 676.52          | 32.74    | 0.84       | 0.79    | 12.47       | 0.62      | 5.63       | 0.09     | 0.02        | 45.39     | 48.66      | 30.88    | 57.63     |
| 160           | 740.67          | 24.49    | 1.17       | 0.92    | 8.57        | 0.49      | 6.78       | 0.10     | 0.02        | 41.65     | 43.94      | 22.92    | 49.56     |
| 170           | 796.00          | 18.83    | 1.40       | 1.07    | 3.95        | 0.64      | 7.77       | 0.10     | 0.03        | 41.26     | 43.01      | 16.95    | 46.23     |
| 180           | 845.98          | 19.83    | 1.52       | 1.28    | 2.35        | 0.88      | 7.89       | 0.11     | 0.04        | 41.34     | 43.62      | 16.51    | 46.64     |

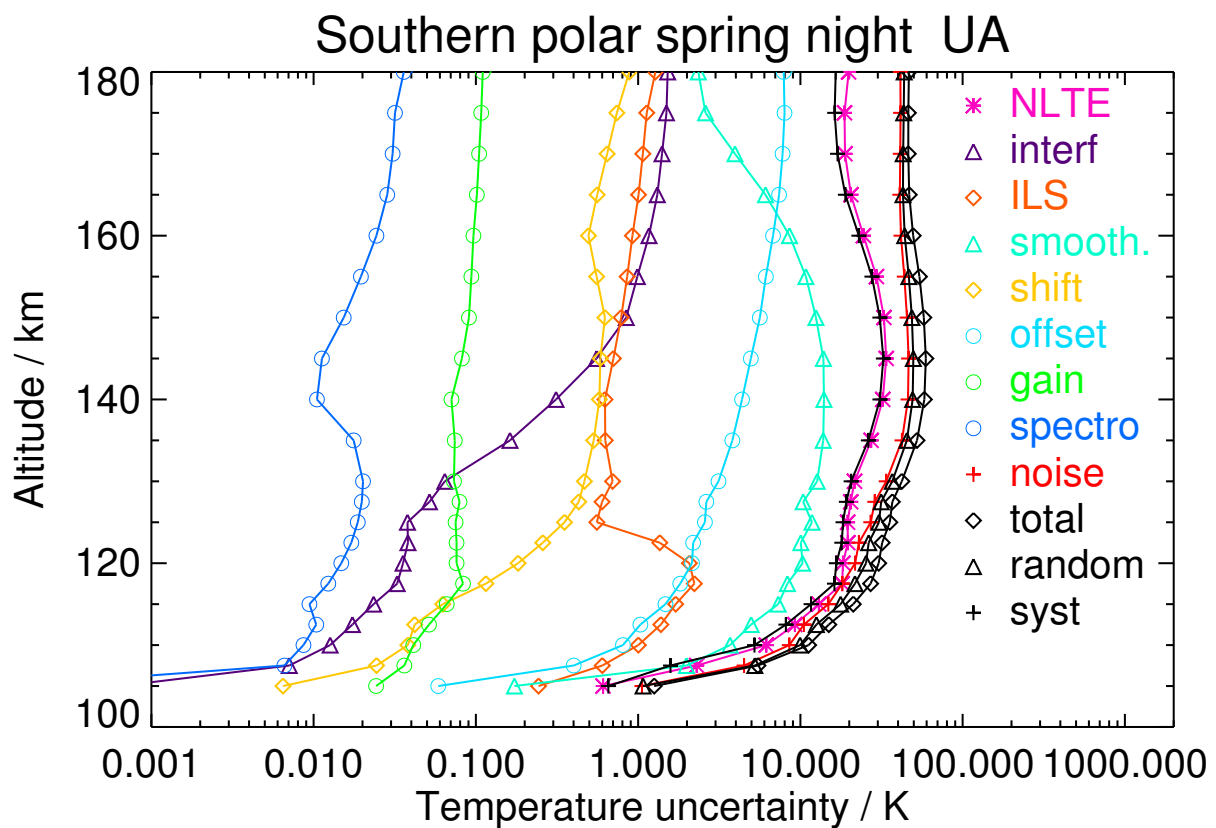

**Figure S234.** V8R\_TwNO\_662 Southern polar spring night, high solar activity

**Table S236.** Temperature error budget for Southern polar summer day, high solar activity. All uncertainties are  $1\sigma$ .

| altitude (km) | mean target (K) | NLTE (K) | interf (K) | ILS (K) | smooth. (K) | shift (K) | offset (K) | gain (K) | spectro (K) | noise (K) | random (K) | syst (K) | total (K) |
|---------------|-----------------|----------|------------|---------|-------------|-----------|------------|----------|-------------|-----------|------------|----------|-----------|
| 110           | 359.88          | 12.74    | 0.02       | 3.33    | 4.18        | 0.22      | 0.81       | 0.06     | <0.01       | 8.78      | 11.04      | 12.12    | 16.39     |
| 120           | 434.52          | 25.47    | 0.07       | 6.16    | 8.37        | 0.20      | 1.52       | 0.09     | <0.01       | 18.09     | 21.48      | 24.99    | 32.95     |
| 130           | 520.87          | 23.53    | 0.17       | 1.08    | 10.09       | 0.47      | 1.77       | 0.05     | <0.01       | 29.09     | 31.90      | 22.11    | 38.81     |
| 140           | 604.94          | 29.58    | 0.75       | 0.86    | 9.60        | 1.05      | 2.31       | 0.07     | <0.01       | 39.72     | 41.93      | 28.18    | 50.53     |
| 150           | 674.31          | 37.70    | 0.95       | 1.14    | 9.96        | 1.29      | 2.56       | 0.11     | 0.01        | 39.02     | 42.03      | 35.87    | 55.26     |
| 160           | 753.75          | 29.24    | 0.89       | 1.20    | 8.04        | 0.87      | 3.18       | 0.10     | 0.02        | 34.21     | 36.83      | 27.33    | 45.86     |
| 170           | 816.26          | 19.62    | 1.38       | 1.41    | 4.18        | 0.52      | 4.46       | 0.12     | 0.03        | 30.02     | 31.91      | 17.59    | 36.44     |
| 180           | 869.88          | 22.90    | 1.87       | 1.98    | 1.70        | 1.03      | 5.73       | 0.15     | 0.04        | 33.10     | 35.33      | 20.40    | 40.80     |

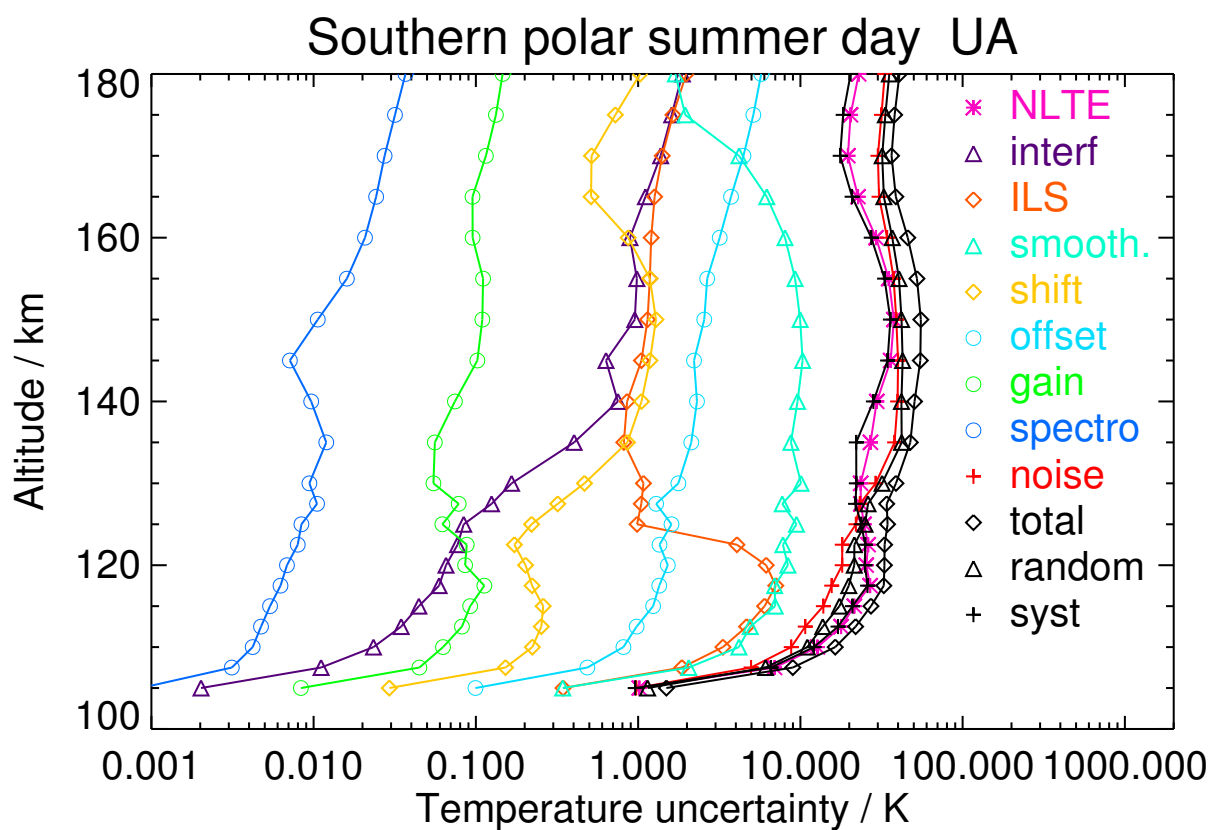

**Figure S235.** V8R\_TwNO\_662 Southern polar summer day, high solar activity



**Table S237.** Temperature error budget for Southern polar summer night, high solar activity. All uncertainties are  $1\sigma$ .

| altitude (km) | mean target (K) | NLTE (K) | interf (K) | ILS (K) | smooth. (K) | shift (K) | offset (K) | gain (K) | spectro (K) | noise (K) | random (K) | syst (K) | total (K) |
|---------------|-----------------|----------|------------|---------|-------------|-----------|------------|----------|-------------|-----------|------------|----------|-----------|
| 110           | 311.72          | 6.85     | 0.02       | 1.23    | 3.59        | 0.28      | 0.83       | 0.04     | <0.01       | 8.08      | 9.97       | 5.29     | 11.29     |
| 120           | 395.78          | 15.79    | 0.08       | 2.57    | 11.27       | 0.22      | 2.43       | 0.07     | 0.01        | 23.06     | 26.93      | 13.98    | 30.34     |
| 130           | 499.08          | 18.91    | 0.12       | 0.81    | 14.25       | 0.37      | 3.59       | 0.08     | 0.02        | 35.24     | 38.74      | 17.77    | 42.62     |
| 140           | 554.60          | 27.43    | 0.50       | 0.71    | 15.03       | 0.55      | 4.77       | 0.08     | 0.01        | 45.25     | 49.07      | 25.32    | 55.22     |
| 150           | 659.02          | 29.04    | 0.90       | 0.85    | 12.57       | 0.57      | 5.72       | 0.06     | 0.01        | 43.74     | 47.57      | 26.19    | 54.30     |
| 160           | 732.70          | 21.09    | 1.30       | 0.94    | 8.01        | 0.48      | 6.79       | 0.08     | 0.02        | 39.38     | 41.93      | 18.72    | 45.92     |
| 170           | 782.65          | 14.77    | 1.59       | 1.08    | 3.99        | 0.57      | 7.56       | 0.11     | 0.03        | 38.84     | 40.53      | 12.71    | 42.47     |
| 180           | 821.27          | 14.97    | 1.71       | 1.23    | 2.43        | 0.82      | 7.93       | 0.11     | 0.03        | 39.23     | 41.47      | 10.82    | 42.86     |

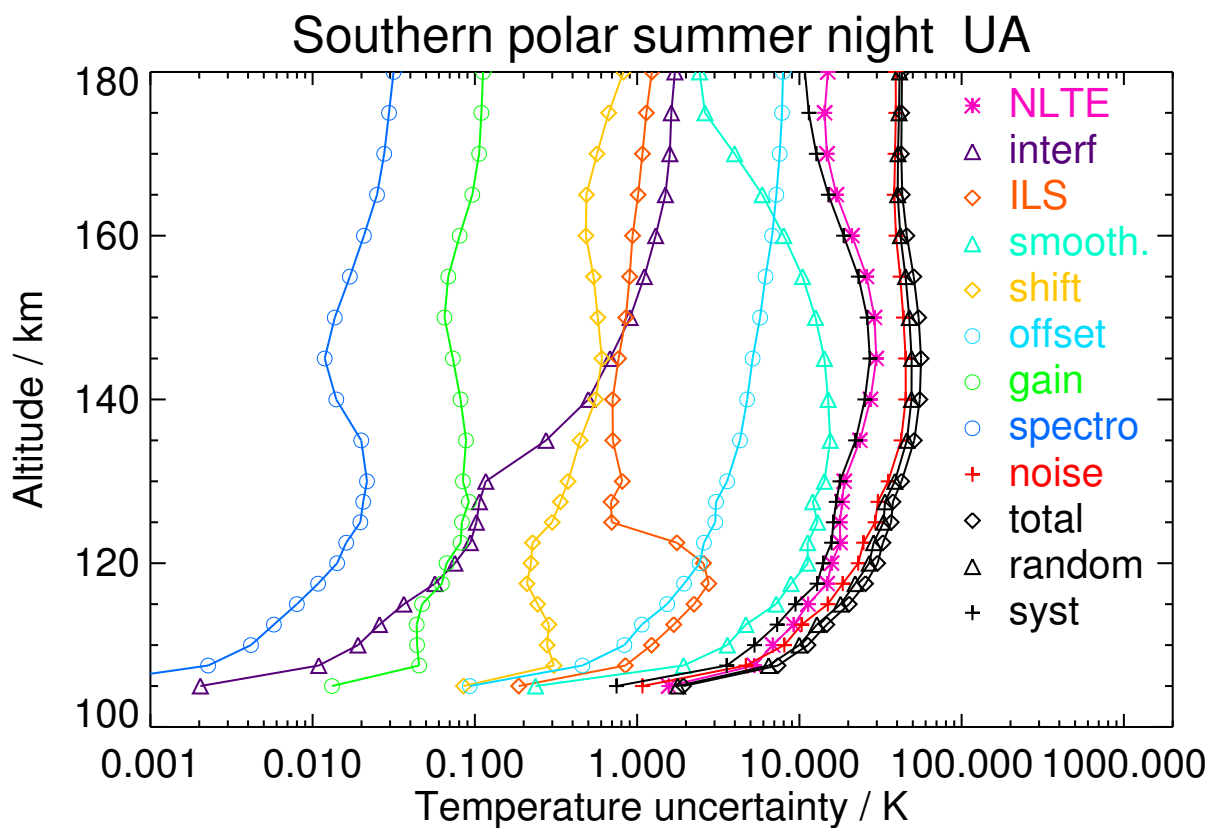

**Figure S236.** V8R\_TwNO\_662 Southern polar summer night, high solar activity

**Table S238.** Temperature error budget for Southern polar autumn day, high solar activity. All uncertainties are  $1\sigma$ .

| altitude (km) | mean target (K) | NLTE (K) | interf (K) | ILS (K) | smooth. (K) | shift (K) | offset (K) | gain (K) | spectro (K) | noise (K) | random (K) | syst (K) | total (K) |
|---------------|-----------------|----------|------------|---------|-------------|-----------|------------|----------|-------------|-----------|------------|----------|-----------|
| 110           | 272.22          | 4.17     | <0.01      | 0.57    | 4.13        | 0.02      | 0.83       | 0.03     | <0.01       | 7.94      | 9.12       | 3.93     | 9.93      |
| 120           | 390.62          | 12.47    | 0.02       | 1.40    | 11.88       | 0.17      | 2.33       | 0.05     | <0.01       | 22.77     | 26.14      | 11.81    | 28.68     |
| 130           | 485.62          | 19.78    | 0.05       | 0.56    | 16.03       | 0.35      | 3.69       | 0.07     | <0.01       | 35.57     | 39.54      | 19.08    | 43.90     |
| 140           | 542.70          | 29.37    | 0.24       | 0.62    | 18.02       | 0.39      | 5.50       | 0.07     | <0.01       | 47.76     | 51.88      | 28.42    | 59.15     |
| 150           | 609.81          | 28.90    | 0.50       | 0.72    | 16.14       | 0.36      | 6.60       | 0.07     | 0.01        | 46.58     | 50.36      | 27.83    | 57.53     |
| 160           | 679.26          | 22.95    | 0.66       | 0.80    | 10.94       | 0.32      | 7.54       | 0.06     | 0.02        | 43.22     | 45.68      | 22.04    | 50.72     |
| 170           | 730.60          | 17.54    | 0.69       | 0.84    | 4.89        | 0.35      | 8.01       | 0.06     | 0.02        | 41.78     | 43.15      | 16.76    | 46.29     |
| 180           | 770.53          | 15.79    | 0.84       | 0.99    | 3.13        | 0.43      | 8.27       | 0.06     | 0.03        | 41.91     | 43.21      | 14.78    | 45.67     |

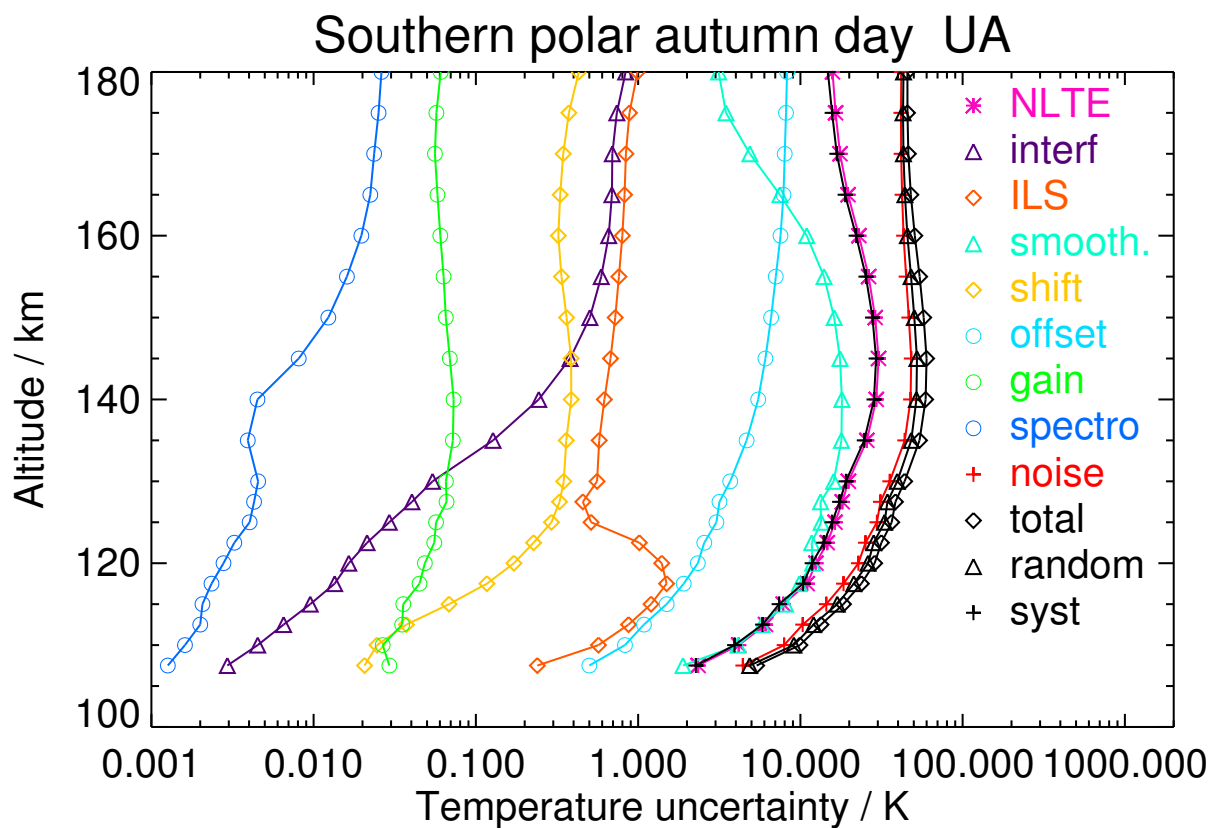

**Figure S237.** V8R\_TwNO\_662 Southern polar autumn day, high solar activity

**Table S239.** Temperature error budget for Southern polar autumn night, high solar activity. All uncertainties are  $1\sigma$ .

| altitude (km) | mean target (K) | NLTE (K) | interf (K) | ILS (K) | smooth. (K) | shift (K) | offset (K) | gain (K) | spectro (K) | noise (K) | random (K) | syst (K) | total (K) |
|---------------|-----------------|----------|------------|---------|-------------|-----------|------------|----------|-------------|-----------|------------|----------|-----------|
| 110           | 266.84          | 3.87     | <0.01      | 0.50    | 3.67        | 0.02      | 0.68       | 0.03     | <0.01       | 7.79      | 8.86       | 3.36     | 9.48      |
| 120           | 400.85          | 13.54    | 0.02       | 1.11    | 11.79       | 0.16      | 2.41       | 0.04     | <0.01       | 23.26     | 26.67      | 12.62    | 29.50     |
| 130           | 516.87          | 21.24    | 0.05       | 0.40    | 13.85       | 0.37      | 3.72       | 0.05     | <0.01       | 35.20     | 38.43      | 20.48    | 43.54     |
| 140           | 566.81          | 29.62    | 0.18       | 0.53    | 16.13       | 0.40      | 5.44       | 0.06     | <0.01       | 47.38     | 51.03      | 28.45    | 58.42     |
| 150           | 630.76          | 26.66    | 0.40       | 0.65    | 14.38       | 0.36      | 6.57       | 0.05     | 0.01        | 46.81     | 50.15      | 25.24    | 56.15     |
| 160           | 697.58          | 20.23    | 0.58       | 0.69    | 9.70        | 0.37      | 7.20       | 0.06     | 0.02        | 42.99     | 45.23      | 18.95    | 49.04     |
| 170           | 750.90          | 15.79    | 0.71       | 0.72    | 4.45        | 0.47      | 7.67       | 0.06     | 0.02        | 40.88     | 42.29      | 14.56    | 44.72     |
| 180           | 791.63          | 14.90    | 0.89       | 0.88    | 3.16        | 0.60      | 8.11       | 0.07     | 0.02        | 41.25     | 42.64      | 13.53    | 44.73     |

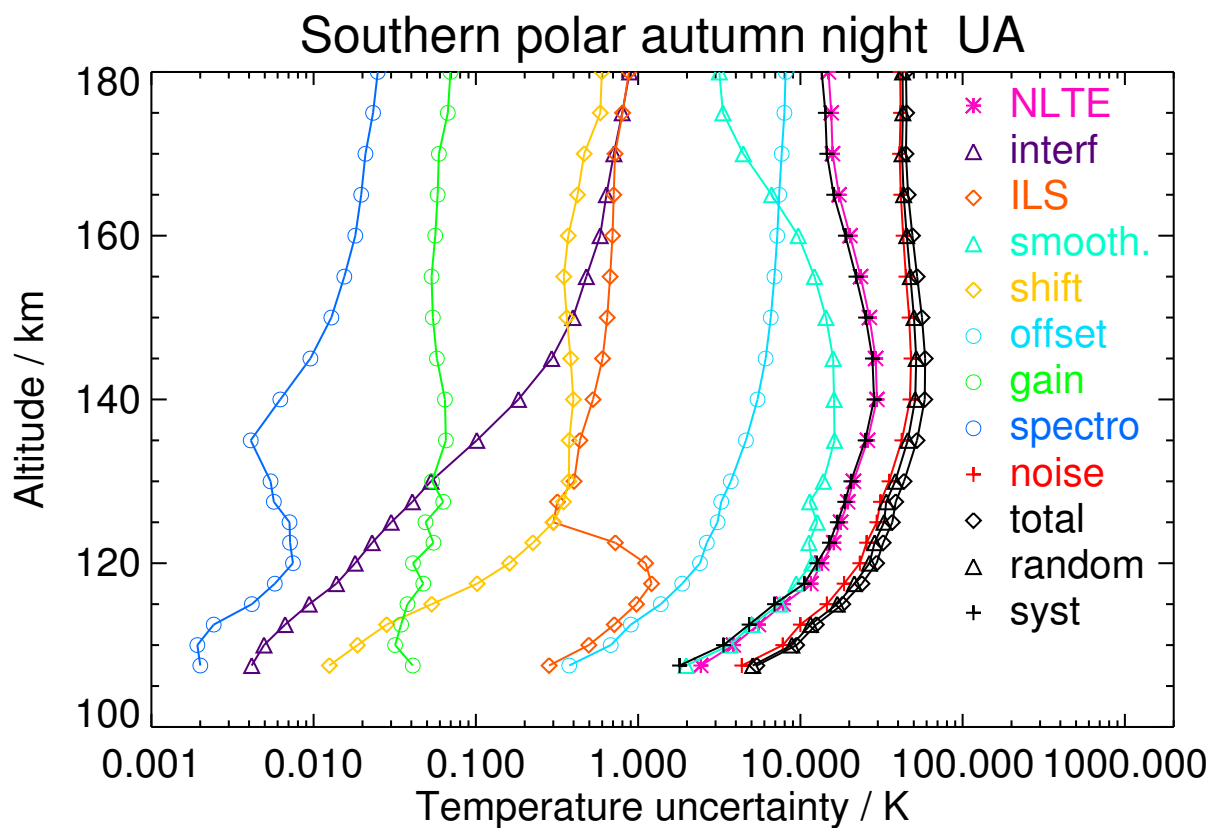

**Figure S238.** V8R\_TwNO\_662 Southern polar autumn night, high solar activity
